# Supplementary material for: Forged in Iron: Molecular Insights into Iron Tolerance in Hermetia illucens
Source: Research Square preprint supplement (doi:10.21203/rs.3.rs-7904328/v1), 2025-11-25
Supplement: Supplementary file 1 [file 3d65d9693724b4ef951c6d55.xlsx]

## Sheet: All deteced Proteins
Checked	Protein FDR Confidence: Combined	Master	Accession	Description	Exp. q-value: Combined	Sum PEP Score	Coverage [%]	# Peptides	# PSMs	# Unique Peptides	# AAs	MW [kDa]	calc. pI	Score Mascot: Mascot	# Peptides (by Search Engine): Mascot	# Razor Peptides	Abundance Ratio: (10 mM FAC) / (100 mM FAC)	Abundance Ratio: (10 mM FAC) / (CNTRL)	Abundance Ratio: (100 mM FAC) / (CNTRL)	Abundance Ratio P-Value: (10 mM FAC) / (100 mM FAC)	Abundance Ratio P-Value: (10 mM FAC) / (CNTRL)	Abundance Ratio P-Value: (100 mM FAC) / (CNTRL)	Abundances (Grouped): 10 mM FAC	Abundances (Grouped): 100 mM FAC	Abundances (Grouped): CNTRL	Abundances (Grouped) CV [%]: 10 mM FAC	Abundances (Grouped) CV [%]: 100 mM FAC	Abundances (Grouped) CV [%]: CNTRL	Found in Sample Group: 10 mM FAC	Found in Sample Group: 100 mM FAC	Found in Sample Group: CNTRL	# Protein Groups	Modifications
FALSE	High	Master Protein	A0A7R8Z362	Twitchin OS=Hermetia illucens OX=343691 GN=HERILL_LOCUS16416 PE=3 SV=1	0	1537.15	32	228	1099	228	8949	1000.4	6.35	31197	228	0	0.956	1.058	1.107	0.965341	0.560163	0.708245	106	110.9	100.2	6.72	13.28	9.46	High	High	High	1	Phospho [S1021; T6188]
	Checked	Confidence	Annotated Sequence	Modifications	Contaminant	# Protein Groups	# Proteins	# PSMs	Master Protein Accessions	Positions in Master Proteins	Modifications in Master Proteins	# Missed Cleavages	Theo. MH+ [Da]	Abundance Ratio: (10 mM FAC) / (100 mM FAC)	Abundance Ratio: (10 mM FAC) / (CNTRL)	Abundance Ratio: (100 mM FAC) / (CNTRL)	Abundances (Grouped): 10 mM FAC	Abundances (Grouped): 100 mM FAC	Abundances (Grouped): CNTRL	Abundances (Grouped) CV [%]: 10 mM FAC	Abundances (Grouped) CV [%]: 100 mM FAC	Abundances (Grouped) CV [%]: CNTRL	Quan Info	Found in Sample: F1: 128C, Sample, 5, 10 mM FAC	Found in Sample: F1: 129N, Sample, 6, 10 mM FAC	Found in Sample: F1: 129C, Sample, 7, 10 mM FAC	Found in Sample: F1: 130N, Sample, 8, 10 mM FAC	Found in Sample: F2: 128C, Sample, 5, 10 mM FAC	Found in Sample: F2: 129N, Sample, 6, 10 mM FAC	Found in Sample: F2: 129C, Sample, 7, 10 mM FAC	Found in Sample: F2: 130N, Sample, 8, 10 mM FAC	Found in Sample: F3: 128C, Sample, 5, 10 mM FAC	Found in Sample: F3: 129N, Sample, 6, 10 mM FAC	Found in Sample: F3: 129C, Sample, 7, 10 mM FAC	Found in Sample: F3: 130N, Sample, 8, 10 mM FAC	Found in Sample: F1: 130C, Sample, 9, 100 mM FAC	Found in Sample: F1: 131N, Sample, 10, 100 mM FAC	Found in Sample: F1: 131C, Sample, 11, 100 mM FAC	Found in Sample: F1: 132N, Sample, 12, 100 mM FAC	Found in Sample: F2: 130C, Sample, 9, 100 mM FAC	Found in Sample: F2: 131N, Sample, 10, 100 mM FAC	Found in Sample: F2: 131C, Sample, 11, 100 mM FAC	Found in Sample: F2: 132N, Sample, 12, 100 mM FAC	Found in Sample: F3: 130C, Sample, 9, 100 mM FAC	Found in Sample: F3: 131N, Sample, 10, 100 mM FAC	Found in Sample: F3: 131C, Sample, 11, 100 mM FAC	Found in Sample: F3: 132N, Sample, 12, 100 mM FAC	Found in Sample: F1: 126, Control, 1, CNTRL	Found in Sample: F1: 127N, Control, 2, CNTRL
	FALSE	High	[K].GVSEIIEGGR.[F]	1xTMTpro [N-Term]	FALSE	1	2	6	A0A7R8Z362	A0A7R8Z362 [1537-1546]		0	1320.74	1.277	1.134	0.888	105.6	82.7	93.1	17.32	28.97	23.72		High	High	High	High	High	High	High	High	High	High	High	High	High	High	High	High	High	High	High	High	High	High	High	High	High	High
	FALSE	High	[K].GPFEPEEVR.[S]	1xTMTpro [N-Term]	FALSE	1	2	6	A0A7R8Z362	A0A7R8Z362 [2407-2415]		0	1363.72	0.925	1.257	1.359	124.4	134.6	99	15.12	16.1	13.48		High	High	High	High	High	High	High	High	High	High	High	High	High	High	High	High	High	High	High	High	High	High	High	High	High	High
	FALSE	High	[K].SSIQTDEER.[T]	1xTMTpro [N-Term]	FALSE	1	2	1	A0A7R8Z362	A0A7R8Z362 [1062-1070]		0	1368.69	1.267	1.328	1.048	142.1	112.1	106.9	22.22	8.32	17.12		n/a	n/a	n/a	n/a	n/a	n/a	n/a	n/a	High	High	High	High	n/a	n/a	n/a	n/a	n/a	n/a	n/a	n/a	High	High	High	High	n/a	n/a
	FALSE	High	[K].DPGAADGGTYR.[C]	1xTMTpro [N-Term]	FALSE	1	2	3	A0A7R8Z362	A0A7R8Z362 [503-513]		0	1383.68	1.272	1.531	1.203	155.3	122.1	101.4	14.29	25.66	20.06		High	High	High	High	High	High	High	High	High	High	High	High	High	High	High	High	High	High	High	High	High	High	High	High	High	High
	FALSE	High	[R].DDVPLTTTDR.[L]	1xTMTpro [N-Term]	FALSE	1	2	3	A0A7R8Z362	A0A7R8Z362 [2643-2652]		0	1436.76	0.916	1.174	1.282	117.8	128.6	100.3	7.4	23.82	14.81		High	High	High	High	High	High	High	High	High	High	High	High	High	High	High	High	High	High	High	High	High	High	High	High	High	High
	FALSE	High	[K].GQPVATDDNTR.[I]	1xTMTpro [N-Term]	FALSE	1	2	6	A0A7R8Z362	A0A7R8Z362 [3537-3547]		0	1477.76	0.886	1.168	1.318	118.4	133.6	101.4	17.13	20.43	20.94		High	High	High	High	High	High	High	High	High	High	High	High	High	High	High	High	High	High	High	High	High	High	High	High	High	High
	FALSE	High	[R].SDSGEYTLSAR.[N]	1xTMTpro [N-Term]	FALSE	1	2	3	A0A7R8Z362	A0A7R8Z362 [5336-5346]		0	1489.75	0.704	0.758	1.077	72.6	103.1	95.7	18.8	37.97	17.9		High	High	High	High	High	High	High	High	High	High	High	High	High	High	High	High	High	High	High	High	High	High	High	High	High	High
	FALSE	High	[K].SDFTATEFDR.[K]	1xTMTpro [N-Term]	FALSE	1	2	3	A0A7R8Z362	A0A7R8Z362 [1182-1191]		0	1492.72	0.878	0.549	0.626	54	61.5	98.3	47.51	51.12	35.94		High	High	High	High	High	High	High	High	High	High	High	High	High	High	High	High	High	High	High	High	High	High	High	High	High	High
	FALSE	High	[K].FNGEPIVPDER.[I]	1xTMTpro [N-Term]	FALSE	1	2	5	A0A7R8Z362	A0A7R8Z362 [1950-1960]		0	1576.83	0.902	1.171	1.297	106.3	117.8	90.8	13.13	15	28.23		High	High	High	High	High	High	High	High	High	High	High	High	High	High	High	High	High	High	High	High	High	High	High	High	High	High
	FALSE	High	[K].FNGEPIVPDER.[I]	1xTMTpro [N-Term]; 1xDeamidated [N2]	FALSE	1	2	13	A0A7R8Z362	A0A7R8Z362 [1950-1960]		0	1577.81	0.942	1.183	1.257	116.4	123.6	98.4	4.13	18.37	11.92		High	High	High	High	High	High	High	High	High	High	High	High	High	High	High	High	High	High	High	High	High	High	High	High	High	High
	FALSE	High	[R].VSTETNDEK.[T]	1xTMTpro [N-Term]; 1xTMTpro [K9]	FALSE	1	2	6	A0A7R8Z362	A0A7R8Z362 [6206-6214]		0	1630.88	0.801	1.132	1.413	112	139.9	99	12.9	23.4	14.48		High	High	High	High	High	High	High	High	High	High	High	High	High	High	High	High	High	High	High	High	High	High	High	High	High	High
	FALSE	High	[R].VSTETNDEK.[T]	1xTMTpro [N-Term]; 1xDeamidated [N6]; 1xTMTpro [K9]	FALSE	1	2	8	A0A7R8Z362	A0A7R8Z362 [6206-6214]		0	1631.86	0.816	1.233	1.512	126	154.5	102.2	9.92	17.21	11.34		High	High	High	High	High	High	High	High	High	High	High	High	High	High	High	High	High	High	High	High	High	High	High	High	High	High
	FALSE	High	[K].EVEVAVSDGK.[V]	1xTMTpro [N-Term]; 1xTMTpro [K10]	FALSE	1	2	5	A0A7R8Z362	A0A7R8Z362 [2055-2064]		0	1640.94	1.18	1.356	1.149	131.6	111.5	97	11.26	13.27	10.28		High	High	High	High	High	High	High	High	High	High	High	High	High	High	High	High	High	High	High	High	High	High	High	High	High	High
	FALSE	High	[K].EETIIEDGK.[V]	1xTMTpro [N-Term]; 1xTMTpro [K9]	FALSE	1	2	6	A0A7R8Z362	A0A7R8Z362 [1049-1057]		0	1641.92	1.809	1.418	0.784	141.5	78.2	99.8	23.64	10.39	9.12		High	High	High	High	High	High	High	High	High	High	High	High	High	High	High	High	High	High	High	High	High	High	High	High	High	High
	FALSE	High	[K].ISNGQGEDVK.[D]	1xTMTpro [N-Term]; 1xDeamidated [N3]; 1xTMTpro [K10]	FALSE	1	2	5	A0A7R8Z362	A0A7R8Z362 [2084-2093]		0	1655.91	1.031	1.163	1.128	118.2	114.6	101.7	16.03	14.44	13.56		High	High	High	High	High	High	High	High	High	High	High	High	High	High	High	High	High	High	High	High	High	High	High	High	High	High
	FALSE	High	[K].EVGPDDGHVK.[Y]	1xTMTpro [N-Term]; 1xTMTpro [K10]	FALSE	1	2	2	A0A7R8Z362	A0A7R8Z362 [7381-7390]		0	1660.92	1.036	1.148	1.108	117.3	113.2	102.2	10.88	16.89	21.53		n/a	n/a	n/a	n/a	High	High	High	High	High	High	High	High	n/a	n/a	n/a	n/a	High	High	High	High	High	High	High	High	n/a	n/a
	FALSE	High	[K].AGNSEPSEASK.[N]	1xTMTpro [N-Term]; 1xTMTpro [K11]	FALSE	1	2	9	A0A7R8Z362	A0A7R8Z362 [4658-4668]		0	1684.9	0.775	1.218	1.572	121.8	157.1	99.9	22.85	21.11	12.36		High	High	High	High	High	High	High	High	High	High	High	High	High	High	High	High	High	High	High	High	High	High	High	High	High	High
	FALSE	High	[K].AGNSEPSEASK.[N]	1xTMTpro [N-Term]; 1xDeamidated [N3]; 1xTMTpro [K11]	FALSE	1	2	7	A0A7R8Z362	A0A7R8Z362 [4658-4668]		0	1685.88	0.74	1.141	1.543	113.1	153	99.1	23.27	26.31	14.17		High	High	High	High	High	High	High	High	High	High	High	High	High	High	High	High	High	High	High	High	High	High	High	High	High	High
	FALSE	High	[K].GDNLQIDSEDYR.[T]	1xTMTpro [N-Term]	FALSE	1	2	3	A0A7R8Z362	A0A7R8Z362 [4133-4144]		0	1728.84	1.258	1.149	0.913	121.2	96.3	105.5	14.75	16.14	17.23		High	High	High	High	High	High	High	High	High	High	High	High	High	High	High	High	High	High	High	High	High	High	High	High	High	High
	FALSE	High	[R].IENEDYNTK.[L]	1xTMTpro [N-Term]; 1xTMTpro [K9]	FALSE	1	2	3	A0A7R8Z362	A0A7R8Z362 [3251-3259]		0	1733.92	0.847	0.936	1.104	92.4	109.1	98.8	25.54	31.62	22.28		High	High	High	High	High	High	High	High	High	High	High	High	High	High	High	High	High	High	High	High	High	High	High	High	High	High
	FALSE	High	[R].SDEQLKEDGR.[T]	1xTMTpro [N-Term]; 1xTMTpro [K6]	FALSE	1	2	1	A0A7R8Z362	A0A7R8Z362 [45-54]		1	1784.96	1.59	1.136	0.715	111.5	70.1	98.2	9.77	28.32	22.07		High	High	High	High	n/a	n/a	n/a	n/a	n/a	n/a	n/a	n/a	High	High	High	High	n/a	n/a	n/a	n/a	n/a	n/a	n/a	n/a	High	High
	FALSE	High	[K].GGNSDPSDPSEK.[V]	1xTMTpro [N-Term]; 1xTMTpro [K12]	FALSE	1	2	7	A0A7R8Z362	A0A7R8Z362 [5543-5554]		0	1797.91	0.955	1.043	1.092	105	110	100.7	24.65	23.81	21.92		High	High	High	High	High	High	High	High	High	High	High	High	High	High	High	High	High	High	High	High	High	High	High	High	High	High
	FALSE	High	[K].DDGEITCDSGK.[L]	1xTMTpro [N-Term]; 1xCarbamidomethyl [C7]; 1xTMTpro [K11]	FALSE	1	2	1	A0A7R8Z362	A0A7R8Z362 [1982-1992]		0	1804.89	0.91	1.137	1.249	111.9	122.9	98.4	21.47	38.79	45.39		High	High	High	High	n/a	n/a	n/a	n/a	n/a	n/a	n/a	n/a	High	High	High	High	n/a	n/a	n/a	n/a	n/a	n/a	n/a	n/a	High	High
	FALSE	High	[K].ACDWDFDEEAFR.[N]	1xTMTpro [N-Term]; 1xCarbamidomethyl [C2]	FALSE	1	2	6	A0A7R8Z362	A0A7R8Z362 [8192-8203]		0	1864.81	0.818	1.227	1.501	126.7	155	103.3	28.69	29.81	30.34		High	High	High	High	High	High	High	High	High	High	High	High	High	High	High	High	High	High	High	High	High	High	High	High	High	High
	FALSE	High	[R].ADNLIEGHDYNFR.[V]	1xTMTpro [N-Term]	FALSE	1	2	2	A0A7R8Z362	A0A7R8Z362 [5424-5436]		0	1867.93	0.894	1.204	1.346	120.6	134.8	100.2	20.27	17.64	9.75		High	High	High	High	High	High	High	High	n/a	n/a	n/a	n/a	High	High	High	High	High	High	High	High	n/a	n/a	n/a	n/a	High	High
	FALSE	High	[K].CAEVEGDVTTGK.[V]	1xCarbamidomethyl [C1]; 1xTMTpro [N-Term]; 1xTMTpro [K12]	FALSE	1	2	3	A0A7R8Z362	A0A7R8Z362 [5218-5229]		0	1873.98	0.739	0.783	1.059	78.8	106.7	100.7	20.23	36.53	24.9		High	High	High	High	High	High	High	High	n/a	n/a	n/a	n/a	High	High	High	High	High	High	High	High	n/a	n/a	n/a	n/a	High	High
	FALSE	High	[K].DVFGEDADEYVCR.[A]	1xTMTpro [N-Term]; 1xCarbamidomethyl [C12]	FALSE	1	2	6	A0A7R8Z362	A0A7R8Z362 [7701-7713]		0	1878.85	0.919	1.437	1.563	144.1	156.8	100.3	22.06	35.4	25.85		High	High	High	High	High	High	High	High	High	High	High	High	High	High	High	High	High	High	High	High	High	High	High	High	High	High
	FALSE	High	[K].LEINEVQDTDK.[G]	1xTMTpro [N-Term]; 1xTMTpro [K11]	FALSE	1	2	5	A0A7R8Z362	A0A7R8Z362 [701-711]		0	1912.05	2.249	1.41	0.627	145.1	64.5	102.9	11.67	19.8	17.88		High	High	High	High	High	High	High	High	High	High	High	High	High	High	High	High	High	High	High	High	High	High	High	High	High	High
	FALSE	High	[R].SDPSETSTSVSTK.[A]	1xTMTpro [N-Term]; 1xTMTpro [K13]	FALSE	1	2	7	A0A7R8Z362	A0A7R8Z362 [7910-7922]		0	1934.02	0.81	1.014	1.252	103.9	128.3	102.5	11.53	12.18	14.9		High	High	High	High	High	High	High	High	High	High	High	High	High	High	High	High	High	High	High	High	High	High	High	High	High	High
	FALSE	High	[R].VPDLTENEEYEFR.[I]	1xTMTpro [N-Term]	FALSE	1	2	7	A0A7R8Z362	A0A7R8Z362 [5524-5536]		0	1944.95	0.914	1.213	1.327	113.9	124.6	93.9	10.01	23.7	26.76		High	High	High	High	High	High	High	High	High	High	High	High	High	High	High	High	High	High	High	High	High	High	High	High	High	High
	FALSE	High	[K].EWSHGDDMVINNDR.[V]	1xTMTpro [N-Term]	FALSE	1	2	6	A0A7R8Z362	A0A7R8Z362 [5303-5316]		0	1991.92	0.91	1.378	1.515	133.7	147	97	19.85	26.3	12.28		High	High	High	High	High	High	High	High	High	High	High	High	High	High	High	High	High	High	High	High	High	High	High	High	High	High
	FALSE	High	[K].EWSHGDDMVINNDR.[V]	1xTMTpro [N-Term]; 1xDeamidated [N]	FALSE	1	2	5	A0A7R8Z362	A0A7R8Z362 [5303-5316]		0	1992.9	0.762	1.463	1.921	149.2	195.9	102	15.03	27.68	15.64		High	High	High	High	High	High	High	High	High	High	High	High	High	High	High	High	High	High	High	High	High	High	High	High	High	High
	FALSE	High	[K].EWSHGDDMVINNDR.[V]	1xTMTpro [N-Term]; 1xOxidation [M8]	FALSE	1	2	4	A0A7R8Z362	A0A7R8Z362 [5303-5316]		0	2007.91	0.873	1.078	1.234	112.7	129.1	104.6	33.24	34.82	20.02		High	High	High	High	High	High	High	High	High	High	High	High	High	High	High	High	High	High	High	High	High	High	High	High	High	High
	FALSE	High	[K].GTAPNLDEGVEYEFR.[V]	1xTMTpro [N-Term]	FALSE	1	2	4	A0A7R8Z362	A0A7R8Z362 [4342-4356]		0	2000.99	0.938	1.051	1.12	107.6	114.7	102.4	18.22	28.1	19.43		High	High	High	High	High	High	High	High	High	High	High	High	High	High	High	High	High	High	High	High	High	High	High	High	High	High
	FALSE	High	[K].EGESEPLETLEGIVAR.[N]	1xTMTpro [N-Term]	FALSE	1	2	14	A0A7R8Z362	A0A7R8Z362 [2483-2498]		0	2033.07	1.124	1.29	1.148	131.7	117.2	102.1	7.88	16	9.82		High	High	High	High	High	High	High	High	High	High	High	High	High	High	High	High	High	High	High	High	High	High	High	High	High	High
	FALSE	High	[K].AVNAIGESEPLEAPK.[S]	1xTMTpro [N-Term]; 1xTMTpro [K15]	FALSE	1	2	5	A0A7R8Z362	A0A7R8Z362 [5733-5747]		0	2133.2	0.9	1.171	1.3	118.8	131.9	101.5	24.24	18.32	13.31		High	High	High	High	High	High	High	High	High	High	High	High	High	High	High	High	High	High	High	High	High	High	High	High	High	High
	FALSE	High	[K].AVNAIGESEPLEAPK.[S]	1xTMTpro [N-Term]; 1xDeamidated [N3]; 1xTMTpro [K15]	FALSE	1	2	9	A0A7R8Z362	A0A7R8Z362 [5733-5747]		0	2134.19	0.856	1.136	1.327	115.7	135.2	101.8	23.47	24.62	13.78		High	High	High	High	High	High	High	High	High	High	High	High	High	High	High	High	High	High	High	High	High	High	High	High	High	High
	FALSE	High	[R].GDSGEYTVTATNSSGK.[D]	1xTMTpro [N-Term]; 1xTMTpro [K16]	FALSE	1	2	6	A0A7R8Z362	A0A7R8Z362 [4745-4760]		0	2182.11	0.984	1.353	1.375	131.4	133.6	97.2	13.17	20.76	14.69		High	High	High	High	High	High	High	High	High	High	High	High	High	High	High	High	High	High	High	High	High	High	High	High	High	High
	FALSE	High	[R].GDSGEYTVTATNSSGK.[D]	1xTMTpro [N-Term]; 1xDeamidated [N12]; 1xTMTpro [K16]	FALSE	1	2	4	A0A7R8Z362	A0A7R8Z362 [4745-4760]		0	2183.1	0.928	1.472	1.587	145	156.3	98.5	9.94	17.09	12.37		High	High	High	High	High	High	High	High	High	High	High	High	High	High	High	High	High	High	High	High	High	High	High	High	High	High
	FALSE	High	[K].TAATVPELTEGQEYEFR.[I]	1xTMTpro [N-Term]	FALSE	1	2	8	A0A7R8Z362	A0A7R8Z362 [5815-5831]		0	2245.13	0.862	1.06	1.23	104.8	121.6	98.8	5.22	11.48	12.46		High	High	High	High	High	High	High	High	High	High	High	High	High	High	High	High	High	High	High	High	High	High	High	High	High	High
	FALSE	High	[K].TAATVPELTEGQEYEFR.[I]	1xTMTpro [N-Term]; 1xDeamidated [Q12]	FALSE	1	2	1	A0A7R8Z362	A0A7R8Z362 [5815-5831]		0	2246.11	1.052	1.14	1.083	98.3	93.4	86.3	33.02	26.63	40.4		n/a	n/a	n/a	n/a	n/a	n/a	n/a	n/a	High	High	High	High	n/a	n/a	n/a	n/a	n/a	n/a	n/a	n/a	High	High	High	High	n/a	n/a
	FALSE	High	[R].EGEVIESGGHYNVEVK.[E]	1xTMTpro [N-Term]; 1xTMTpro [K16]	FALSE	1	2	4	A0A7R8Z362	A0A7R8Z362 [7772-7787]		0	2354.25	0.807	1.211	1.5	121.7	150.8	100.5	42.78	27.54	18.12		High	High	High	High	High	High	High	High	High	High	High	High	High	High	High	High	High	High	High	High	High	High	High	High	High	High
	FALSE	High	[K].EGESEPLETEHSIIAK.[N]	1xTMTpro [N-Term]; 1xTMTpro [K16]	FALSE	1	2	4	A0A7R8Z362	A0A7R8Z362 [3672-3687]		0	2377.27	0.843	1.088	1.291	113.5	134.7	104.3	19.28	20.81	15.28		High	High	High	High	High	High	High	High	High	High	High	High	High	High	High	High	High	High	High	High	High	High	High	High	High	High
	FALSE	High	[R].VMAENQYGQSEPAETEQPIR.[A]	1xTMTpro [N-Term]	FALSE	1	2	13	A0A7R8Z362	A0A7R8Z362 [6722-6741]		0	2581.25	0.887	1.202	1.355	116.3	131.1	96.8	24.27	25.26	25.16		High	High	High	High	High	High	High	High	High	High	High	High	High	High	High	High	High	High	High	High	High	High	High	High	High	High
	FALSE	High	[R].VMAENQYGQSEPAETEQPIR.[A]	1xTMTpro [N-Term]; 1xOxidation [M2]	FALSE	1	2	9	A0A7R8Z362	A0A7R8Z362 [6722-6741]		0	2597.25	0.826	1.378	1.668	138.4	167.6	100.5	12.82	24.87	19.36		High	High	High	High	High	High	High	High	High	High	High	High	High	High	High	High	High	High	High	High	High	High	High	High	High	High
	FALSE	High	[K].AVNAEGESEPLVTESATTAK.[N]	1xTMTpro [N-Term]; 1xTMTpro [K20]	FALSE	1	2	8	A0A7R8Z362	A0A7R8Z362 [3963-3982]		0	2612.39	0.935	1.306	1.397	131.3	140.5	100.6	14.43	24.64	14.97		High	High	High	High	High	High	High	High	High	High	High	High	High	High	High	High	High	High	High	High	High	High	High	High	High	High
	FALSE	High	[K].AVNAEGESEPLVTESATTAK.[N]	1xTMTpro [N-Term]; 1xDeamidated [N3]; 1xTMTpro [K20]	FALSE	1	2	9	A0A7R8Z362	A0A7R8Z362 [3963-3982]		0	2613.38	0.873	1.293	1.48	127.6	146.2	98.8	13.1	25.71	10.93		High	High	High	High	High	High	High	High	High	High	High	High	High	High	High	High	High	High	High	High	High	High	High	High	High	High
	FALSE	High	[K].AVNEEGESEPLETESAIVAK.[N]	1xTMTpro [N-Term]; 1xTMTpro [K20]	FALSE	1	2	12	A0A7R8Z362	A0A7R8Z362 [3373-3392]		0	2710.43	0.869	1.285	1.478	129.3	148.8	100.7	27.79	31.38	16.29		High	High	High	High	High	High	High	High	High	High	High	High	High	High	High	High	High	High	High	High	High	High	High	High	High	High
	FALSE	High	[K].AVNEEGESEPLETESAIVAK.[N]	1xTMTpro [N-Term]; 1xDeamidated [N3]; 1xTMTpro [K20]	FALSE	1	2	1	A0A7R8Z362	A0A7R8Z362 [3373-3392]		0	2711.41	0.892	1.256	1.409	126.9	142.3	101	30.65	38.67	14.35		n/a	n/a	n/a	n/a	n/a	n/a	n/a	n/a	High	High	High	High	n/a	n/a	n/a	n/a	n/a	n/a	n/a	n/a	High	High	High	High	n/a	n/a
	FALSE	High	[K].AINEEGESEPLETDGSIIAK.[N]	1xTMTpro [N-Term]; 1xTMTpro [K20]	FALSE	1	2	11	A0A7R8Z362	A0A7R8Z362 [3076-3095]		0	2710.43	0.915	1.165	1.273	116.3	127.2	99.9	24.63	31.52	20.81		High	High	High	High	High	High	High	High	High	High	High	High	High	High	High	High	High	High	High	High	High	High	High	High	High	High
	FALSE	High	[K].AINEEGESEPLETDGSIIAK.[N]	1xTMTpro [N-Term]; 1xDeamidated [N3]; 1xTMTpro [K20]	FALSE	1	2	4	A0A7R8Z362	A0A7R8Z362 [3076-3095]		0	2711.41	1.098	1.146	1.044	114.4	104.2	99.9	14.88	17.23	12.94		n/a	n/a	n/a	n/a	High	High	High	High	High	High	High	High	n/a	n/a	n/a	n/a	High	High	High	High	High	High	High	High	n/a	n/a
	FALSE	High	[R].GDSGTYTLTAENINGSDTADVK.[V]	1xTMTpro [N-Term]; 1xTMTpro [K22]	FALSE	1	2	2	A0A7R8Z362	A0A7R8Z362 [5039-5060]		0	2837.43	0.775	0.795	1.026	74.6	96.2	93.8	23.62	9.34	26.1		High	High	High	High	n/a	n/a	n/a	n/a	High	High	High	High	High	High	High	High	n/a	n/a	n/a	n/a	High	High	High	High	High	High
	FALSE	High	[R].GDSGTYTLTAENINGSDTADVK.[V]	1xTMTpro [N-Term]; 1xDeamidated [N14]; 1xTMTpro [K22]	FALSE	1	2	10	A0A7R8Z362	A0A7R8Z362 [5039-5060]		0	2838.41	0.908	0.889	0.979	86.6	95.4	97.4	22.56	12.22	20.01		High	High	High	High	High	High	High	High	High	High	High	High	High	High	High	High	High	High	High	High	High	High	High	High	High	High
	FALSE	High	[R].VSAVNAEGESEPLEADHSIVAK.[N]	1xTMTpro [N-Term]; 1xTMTpro [K22]	FALSE	1	2	6	A0A7R8Z362	A0A7R8Z362 [4256-4277]		0	2860.52	0.875	1.122	1.282	114.6	130.9	102.1	19	27.88	16.59		High	High	High	High	High	High	High	High	High	High	High	High	High	High	High	High	High	High	High	High	High	High	High	High	High	High
	FALSE	High	[K].ACETTSPTPAATVNGLVEGNEYQFR.[V]	1xTMTpro [N-Term]; 1xCarbamidomethyl [C2]; 1xDeamidated [N14]	FALSE	1	2	6	A0A7R8Z362	A0A7R8Z362 [4627-4651]		0	3017.45	1.029	0.937	0.91	92.6	90	98.8	11.26	20.33	13.84		High	High	High	High	High	High	High	High	High	High	High	High	High	High	High	High	High	High	High	High	High	High	High	High	High	High
	FALSE	High	[K].SDGGAPIEK.[Y]	1xTMTpro [N-Term]; 1xTMTpro [K9]	FALSE	1	2	3	A0A7R8Z362	A0A7R8Z362 [3718-3726]		0	1481.85	1.061	1.307	1.232	131.7	124.1	100.8	21.86	25.55	13.72		High	High	High	High	High	High	High	High	High	High	High	High	High	High	High	High	High	High	High	High	High	High	High	High	High	High
	FALSE	High	[K].ESSASSSVK.[I]	1xTMTpro [N-Term]; 1xTMTpro [K9]	FALSE	1	2	5	A0A7R8Z362	A0A7R8Z362 [7622-7630]		0	1489.84	0.876	1.407	1.606	139.8	159.6	99.4	9.79	24.53	12.36		High	High	High	High	High	High	High	High	High	High	High	High	High	High	High	High	High	High	High	High	High	High	High	High	High	High
	FALSE	High	[K].ISGEPPPTK.[S]	1xTMTpro [N-Term]; 1xTMTpro [K9]	FALSE	1	2	7	A0A7R8Z362	A0A7R8Z362 [4113-4121]		0	1533.91	0.875	1.165	1.331	116.8	133.5	100.2	12.98	20.54	8.67		High	High	High	High	High	High	High	High	High	High	High	High	High	High	High	High	High	High	High	High	High	High	High	High	High	High
	FALSE	High	[R].GWTDAATVPGDR.[T]	1xTMTpro [N-Term]	FALSE	1	2	5	A0A7R8Z362	A0A7R8Z362 [3738-3749]		0	1549.79	0.791	1.141	1.443	105.1	132.9	92.1	15.24	29.03	20.77		High	High	High	High	High	High	High	High	High	High	High	High	High	High	High	High	High	High	High	High	High	High	High	High	High	High
	FALSE	High	[R].EITTTFDGTTAR.[L]	1xTMTpro [N-Term]	FALSE	1	2	3	A0A7R8Z362	A0A7R8Z362 [791-802]		0	1616.85	1.766	0.89	0.504	85.5	48.4	96	25.8	18.39	28.21		High	High	High	High	High	High	High	High	High	High	High	High	High	High	High	High	High	High	High	High	High	High	High	High	High	High
	FALSE	High	[R].HPFDPPGAPGAPR.[G]	1xTMTpro [N-Term]	FALSE	1	2	3	A0A7R8Z362	A0A7R8Z362 [6744-6756]		0	1619.86	0.845	1.253	1.482	123.3	145.9	98.4	22.18	24.56	19.93		High	High	High	High	High	High	High	High	High	High	High	High	High	High	High	High	High	High	High	High	High	High	High	High	High	High
	FALSE	High	[K].GLTEGHEYQFR.[V]	1xTMTpro [N-Term]	FALSE	1	2	5	A0A7R8Z362	A0A7R8Z362 [3063-3073]		0	1640.84	1.011	0.859	0.85	83.4	82.5	97	24.37	27.73	23.67		High	High	High	High	High	High	High	High	High	High	High	High	High	High	High	High	High	High	High	High	High	High	High	High	High	High
	FALSE	High	[K].AGPSEPSDVSK.[S]	1xTMTpro [N-Term]; 1xTMTpro [K11]	FALSE	1	2	3	A0A7R8Z362	A0A7R8Z362 [3773-3783]		0	1681.93	0.824	1.255	1.523	121.6	147.5	96.9	19.5	33.29	16.28		High	High	High	High	High	High	High	High	High	High	High	High	High	High	High	High	High	High	High	High	High	High	High	High	High	High
	FALSE	High	[R].IDNVDYNTK.[F]	1xTMTpro [N-Term]; 1xTMTpro [K9]	FALSE	1	2	3	A0A7R8Z362	A0A7R8Z362 [3548-3556]		0	1689.93	0.814	0.884	1.086	90.9	111.8	102.9	19.9	21.74	27.75		n/a	n/a	n/a	n/a	High	High	High	High	High	High	High	High	n/a	n/a	n/a	n/a	High	High	High	High	High	High	High	High	n/a	n/a
	FALSE	High	[K].ITDVEYNTK.[L]	1xTMTpro [N-Term]; 1xTMTpro [K9]	FALSE	1	2	5	A0A7R8Z362	A0A7R8Z362 [5022-5030]		0	1690.95	0.749	1.113	1.486	108.3	144.6	97.3	24.21	25.29	13.55		High	High	High	High	High	High	High	High	High	High	High	High	High	High	High	High	High	High	High	High	High	High	High	High	High	High
	FALSE	High	[K].ITDVEYNTK.[L]	1xTMTpro [N-Term]; 1xDeamidated [N7]; 1xTMTpro [K9]	FALSE	1	2	2	A0A7R8Z362	A0A7R8Z362 [5022-5030]		0	1691.93	0.789	1.132	1.436	112.4	142.5	99.2	14.18	30.25	12.79		n/a	n/a	n/a	n/a	High	High	High	High	High	High	High	High	n/a	n/a	n/a	n/a	High	High	High	High	High	High	High	High	n/a	n/a
	FALSE	High	[R].EGEPIYLDVK.[V]	1xTMTpro [N-Term]; 1xTMTpro [K10]	FALSE	1	2	3	A0A7R8Z362	A0A7R8Z362 [4398-4407]		0	1771.01	0.705	0.852	1.208	81.2	115.2	95.3	23.95	21.65	20.94		High	High	High	High	High	High	High	High	High	High	High	High	High	High	High	High	High	High	High	High	High	High	High	High	High	High
	FALSE	High	[R].TSPTDTELDVK.[G]	1xTMTpro [N-Term]; 1xTMTpro [K11]	FALSE	1	2	3	A0A7R8Z362	A0A7R8Z362 [3052-3062]		0	1814	0.688	0.76	1.105	75.7	110.1	99.6	25	34.32	32.87		High	High	High	High	High	High	High	High	High	High	High	High	High	High	High	High	High	High	High	High	High	High	High	High	High	High
	FALSE	High	[R].DMTVIAGDDFK.[I]	1xTMTpro [N-Term]; 1xTMTpro [K11]	FALSE	1	2	6	A0A7R8Z362	A0A7R8Z362 [6860-6870]		0	1819.98	0.933	1.249	1.338	123.8	132.7	99.1	14.66	14.74	7.9		High	High	High	High	High	High	High	High	High	High	High	High	High	High	High	High	High	High	High	High	High	High	High	High	High	High
	FALSE	High	[R].DMTVIAGDDFK.[I]	1xTMTpro [N-Term]; 1xOxidation [M2]; 1xTMTpro [K11]	FALSE	1	2	2	A0A7R8Z362	A0A7R8Z362 [6860-6870]		0	1835.97	0.792	1.168	1.474	115.2	145.5	98.7	23.03	20.45	12.07		High	High	High	High	High	High	High	High	n/a	n/a	n/a	n/a	High	High	High	High	High	High	High	High	n/a	n/a	n/a	n/a	High	High
	FALSE	High	[K].GESQPVIECPK.[E]	1xTMTpro [N-Term]; 1xCarbamidomethyl [C9]; 1xTMTpro [K11]	FALSE	1	2	3	A0A7R8Z362	A0A7R8Z362 [2004-2014]		0	1852.01	1.2	1.28	1.066	128.2	106.8	100.1	11.1	21.92	23.95		High	High	High	High	High	High	High	High	High	High	High	High	High	High	High	High	High	High	High	High	High	High	High	High	High	High
	FALSE	High	[K].SPEADVTGLTEGK.[D]	1xTMTpro [N-Term]; 1xTMTpro [K13]	FALSE	1	2	4	A0A7R8Z362	A0A7R8Z362 [3943-3955]		0	1912.05	1.353	1.613	1.192	154	113.8	95.5	20.7	19.22	16.35		High	High	High	High	High	High	High	High	High	High	High	High	High	High	High	High	High	High	High	High	High	High	High	High	High	High
	FALSE	High	[K].YVPQPVDISTDSVYDR.[Y]	1xTMTpro [N-Term]	FALSE	1	2	6	A0A7R8Z362	A0A7R8Z362 [7965-7980]		0	2158.1	0.957	1.091	1.14	108.4	113.2	99.3	6.33	4.04	11.68		High	High	High	High	High	High	High	High	High	High	High	High	High	High	High	High	High	High	High	High	High	High	High	High	High	High
	FALSE	High	[R].ITAENELGSDTAIIK.[I]	1xTMTpro [N-Term]; 1xTMTpro [K15]	FALSE	1	2	9	A0A7R8Z362	A0A7R8Z362 [7808-7822]		0	2183.24	0.972	1.127	1.16	112.5	115.8	99.9	7.43	16.05	7.53		High	High	High	High	High	High	High	High	High	High	High	High	High	High	High	High	High	High	High	High	High	High	High	High	High	High
	FALSE	High	[R].ITAENELGSDTAIIK.[I]	1xTMTpro [N-Term]; 1xDeamidated [N5]; 1xTMTpro [K15]	FALSE	1	2	6	A0A7R8Z362	A0A7R8Z362 [7808-7822]		0	2184.23	0.898	1.066	1.186	109.7	122.1	102.9	15.37	20.05	12.94		High	High	High	High	High	High	High	High	High	High	High	High	High	High	High	High	High	High	High	High	High	High	High	High	High	High
	FALSE	High	[K].VAGEPAPDVAWQHNGK.[T]	1xTMTpro [N-Term]; 1xTMTpro [K16]	FALSE	1	2	6	A0A7R8Z362	A0A7R8Z362 [4408-4423]		0	2284.23	0.787	0.977	1.241	97.3	123.6	99.6	12.25	24.29	18.51		High	High	High	High	High	High	High	High	High	High	High	High	High	High	High	High	High	High	High	High	High	High	High	High	High	High
	FALSE	High	[K].VAGEPAPDVAWQHNGK.[T]	1xTMTpro [N-Term]; 1xDeamidated [N14]; 1xTMTpro [K16]	FALSE	1	2	8	A0A7R8Z362	A0A7R8Z362 [4408-4423]		0	2285.22	0.86	1.042	1.212	102.2	118.8	98.1	17.38	25.24	13.52		High	High	High	High	High	High	High	High	High	High	High	High	High	High	High	High	High	High	High	High	High	High	High	High	High	High
	FALSE	High	[K].AGSSEPSEPTDNHLCK.[H]	1xTMTpro [N-Term]; 1xCarbamidomethyl [C15]; 1xTMTpro [K16]	FALSE	1	2	5	A0A7R8Z362	A0A7R8Z362 [2584-2599]		0	2337.16	0.939	1.303	1.388	130	138.4	99.7	22.34	23.81	33.81		High	High	High	High	High	High	High	High	High	High	High	High	High	High	High	High	High	High	High	High	High	High	High	High	High	High
	FALSE	High	[R].LEKGDNLQIDSEDYR.[T]	1xTMTpro [N-Term]; 1xTMTpro [K3]	FALSE	1	2	1	A0A7R8Z362	A0A7R8Z362 [4130-4144]		1	2403.26	0.892	0.853	0.956	85.7	96.1	100.5	13.37	23.93	22.29		n/a	n/a	n/a	n/a	High	High	High	High	n/a	n/a	n/a	n/a	n/a	n/a	n/a	n/a	High	High	High	High	n/a	n/a	n/a	n/a	n/a	n/a
	FALSE	High	[K].LELQDPQLEDSGLYK.[C]	1xTMTpro [N-Term]; 1xTMTpro [K15]	FALSE	1	2	8	A0A7R8Z362	A0A7R8Z362 [603-617]		0	2356.29	1.764	1.279	0.725	131.8	74.7	103	14.52	17.18	14.89		High	High	High	High	High	High	High	High	High	High	High	High	High	High	High	High	High	High	High	High	High	High	High	High	High	High
	FALSE	High	[K].LELQDPQLEDSGLYK.[C]	1xTMTpro [N-Term]; 1xDeamidated [Q7]; 1xTMTpro [K15]	FALSE	1	2	1	A0A7R8Z362	A0A7R8Z362 [603-617]		0	2357.27	1.469	1.311	0.892	120.3	81.9	91.8	12.06	5.98	16.63		n/a	n/a	n/a	n/a	High	High	High	High	n/a	n/a	n/a	n/a	n/a	n/a	n/a	n/a	High	High	High	High	n/a	n/a	n/a	n/a	n/a	n/a
	FALSE	High	[R].ATEPNAEVTGLTPGGEYK.[F]	1xTMTpro [N-Term]; 1xTMTpro [K18]	FALSE	1	2	6	A0A7R8Z362	A0A7R8Z362 [4826-4843]		0	2442.3	1.132	1.225	1.083	123.1	108.8	100.5	9.89	15.52	15.08		High	High	High	High	High	High	High	High	High	High	High	High	High	High	High	High	High	High	High	High	High	High	High	High	High	High
	FALSE	High	[R].ATEPNAEVTGLTPGGEYK.[F]	1xTMTpro [N-Term]; 1xDeamidated [N5]; 1xTMTpro [K18]	FALSE	1	2	1	A0A7R8Z362	A0A7R8Z362 [4826-4843]		0	2443.28										No Quan Values	n/a	n/a	n/a	n/a	High	High	High	High	n/a	n/a	n/a	n/a	n/a	n/a	n/a	n/a	High	High	High	High	n/a	n/a	n/a	n/a	n/a	n/a
	FALSE	High	[K].AVNKEGESEPLETLEGIVAR.[N]	1xTMTpro [N-Term]; 1xTMTpro [K4]	FALSE	1	2	9	A0A7R8Z362	A0A7R8Z362 [2479-2498]		1	2749.52	1.198	1.068	0.891	108.1	90.2	101.2	17.4	34.54	16.68		High	High	High	High	High	High	High	High	High	High	High	High	High	High	High	High	High	High	High	High	High	High	High	High	High	High
	FALSE	High	[K].AVNKEGESEPLETLEGIVAR.[N]	1xTMTpro [N-Term]; 1xDeamidated [N3]; 1xTMTpro [K4]	FALSE	1	2	1	A0A7R8Z362	A0A7R8Z362 [2479-2498]		1	2750.51	1.054	1.071	1.016	106.8	101.3	99.7	15.65	21.27	17		n/a	n/a	n/a	n/a	High	High	High	High	n/a	n/a	n/a	n/a	n/a	n/a	n/a	n/a	High	High	High	High	n/a	n/a	n/a	n/a	n/a	n/a
	FALSE	High	[R].AENQYGVGEPLSMDEPVLAK.[Y]	1xTMTpro [N-Term]; 1xTMTpro [K20]	FALSE	1	2	4	A0A7R8Z362	A0A7R8Z362 [7020-7039]		0	2755.45	1.21	1.077	0.89	103.7	85.7	96.2	11.16	6.27	25.49		High	High	High	High	High	High	High	High	n/a	n/a	n/a	n/a	High	High	High	High	High	High	High	High	n/a	n/a	n/a	n/a	High	High
	FALSE	High	[R].AENQYGVGEPLSMDEPVLAK.[Y]	1xTMTpro [N-Term]; 1xDeamidated [Q4]; 1xTMTpro [K20]	FALSE	1	2	1	A0A7R8Z362	A0A7R8Z362 [7020-7039]		0	2756.43	1.245	1.028	0.826	96	77.1	93.4	16.38	14.67	22.23		n/a	n/a	n/a	n/a	n/a	n/a	n/a	n/a	High	High	High	High	n/a	n/a	n/a	n/a	n/a	n/a	n/a	n/a	High	High	High	High	n/a	n/a
	FALSE	High	[R].AENQYGVGEPLSMDEPVLAK.[Y]	1xTMTpro [N-Term]; 1xOxidation [M13]; 1xTMTpro [K20]	FALSE	1	2	3	A0A7R8Z362	A0A7R8Z362 [7020-7039]		0	2771.44	0.978	1.053	1.076	110.6	113.1	105.1	12.72	24.92	18.44		High	High	High	High	High	High	High	High	High	High	High	High	High	High	High	High	High	High	High	High	High	High	High	High	High	High
	FALSE	High	[R].VSAVNAEGESAPLVADETIVAK.[N]	1xTMTpro [N-Term]; 1xTMTpro [K22]	FALSE	1	2	9	A0A7R8Z362	A0A7R8Z362 [4846-4867]		0	2778.54	1.117	1.094	0.979	108.8	97.3	99.4	8.11	5.66	10.48		High	High	High	High	High	High	High	High	High	High	High	High	High	High	High	High	High	High	High	High	High	High	High	High	High	High
	FALSE	High	[R].VSAVNAEGESAPLVADETIVAK.[N]	1xTMTpro [N-Term]; 1xDeamidated [N5]; 1xTMTpro [K22]	FALSE	1	2	7	A0A7R8Z362	A0A7R8Z362 [4846-4867]		0	2779.52	1.101	1.109	1.008	111	100.9	100.1	3.97	7.3	8.1		High	High	High	High	High	High	High	High	High	High	High	High	High	High	High	High	High	High	High	High	High	High	High	High	High	High
	FALSE	High	[K].WDKPEDDGGEPIEHYLVER.[M]	1xTMTpro [N-Term]; 1xTMTpro [K3]	FALSE	1	2	4	A0A7R8Z362	A0A7R8Z362 [3909-3927]		0	2892.47	1.394	0.817	0.586	69.2	49.7	84.7	31.92	32.36	47.34		High	High	High	High	High	High	High	High	High	High	High	High	High	High	High	High	High	High	High	High	High	High	High	High	High	High
	FALSE	High	[K].DPYDEPLKPGTPEVTDYDNK.[S]	1xTMTpro [N-Term]; 2xTMTpro [K8; K20]	FALSE	1	2	1	A0A7R8Z362	A0A7R8Z362 [2799-2818]		0	3205.67										No Quan Values	n/a	n/a	n/a	n/a	n/a	n/a	n/a	n/a	High	High	High	High	n/a	n/a	n/a	n/a	n/a	n/a	n/a	n/a	High	High	High	High	n/a	n/a
	FALSE	High	[K].NPFDEPGAPGQPEATDWDKDHVDLR.[W]	1xTMTpro [N-Term]; 1xTMTpro [K19]	FALSE	1	2	5	A0A7R8Z362	A0A7R8Z362 [4278-4302]		1	3414.68	0.843	1.111	1.318	110.9	131.6	99.8	12.74	25.02	10.92		High	High	High	High	High	High	High	High	High	High	High	High	High	High	High	High	High	High	High	High	High	High	High	High	High	High
	FALSE	High	[K].NEFGESNANLNLNIEAEPEPEGDGPEFVEKPR.[I]	1xTMTpro [N-Term]; 1xTMTpro [K30]	FALSE	1	2	2	A0A7R8Z362	A0A7R8Z362 [518-549]		0	4150.05	1.454	0.914	0.628	86.9	59.7	95.1	25.73	19.82	16.41		High	High	High	High	n/a	n/a	n/a	n/a	High	High	High	High	High	High	High	High	n/a	n/a	n/a	n/a	High	High	High	High	High	High
	FALSE	High	[K].NEFGESNANLNLNIEAEPEPEGDGPEFVEKPR.[I]	1xTMTpro [N-Term]; 1xDeamidated [N13]; 1xTMTpro [K30]	FALSE	1	2	1	A0A7R8Z362	A0A7R8Z362 [518-549]		0	4151.03										No Quan Values	n/a	n/a	n/a	n/a	High	High	High	High	n/a	n/a	n/a	n/a	n/a	n/a	n/a	n/a	High	High	High	High	n/a	n/a	n/a	n/a	n/a	n/a
	FALSE	High	[K].TLLHIDQSTR.[Q]	1xTMTpro [N-Term]	FALSE	1	2	3	A0A7R8Z362	A0A7R8Z362 [6215-6224]		0	1487.85	0.867	0.688	0.794	70.3	81.1	102.2	6.94	8.74	17.04		High	High	High	High	High	High	High	High	High	High	High	High	High	High	High	High	High	High	High	High	High	High	High	High	High	High
	FALSE	High	[R].QIDGFAPTFTK.[K]	1xTMTpro [N-Term]; 1xTMTpro [K11]	FALSE	1	2	4	A0A7R8Z362	A0A7R8Z362 [113-123]		0	1833.04	2.29	1.057	0.462	107.6	47	101.8	18.07	18.64	15.17		High	High	High	High	High	High	High	High	High	High	High	High	High	High	High	High	High	High	High	High	High	High	High	High	High	High
	FALSE	High	[R].EQSGPYQIK.[I]	1xTMTpro [N-Term]; 1xTMTpro [K9]	FALSE	1	2	6	A0A7R8Z362	A0A7R8Z362 [2075-2083]		0	1657.94	1.076	0.879	0.817	87.1	80.9	99	30.42	18.19	12.22		High	High	High	High	High	High	High	High	High	High	High	High	High	High	High	High	High	High	High	High	High	High	High	High	High	High
	FALSE	High	[K].AGLSPPSDPSK.[V]	1xTMTpro [N-Term]; 1xTMTpro [K11]	FALSE	1	2	3	A0A7R8Z362	A0A7R8Z362 [2884-2894]		0	1663.95	1.017	0.906	0.89	92.7	91.1	102.3	14.56	33.27	20.02		High	High	High	High	High	High	High	High	High	High	High	High	High	High	High	High	High	High	High	High	High	High	High	High	High	High
	FALSE	High	[R].DTTISAGTALK.[F]	1xTMTpro [N-Term]; 1xTMTpro [K11]	FALSE	1	2	3	A0A7R8Z362	A0A7R8Z362 [4688-4698]		0	1685.99	0.929	1.063	1.144	102.7	110.6	96.7	25.11	6.02	9.2		High	High	High	High	n/a	n/a	n/a	n/a	High	High	High	High	High	High	High	High	n/a	n/a	n/a	n/a	High	High	High	High	High	High
	FALSE	High	[K].NPSGFDTATINVR.[V]	1xTMTpro [N-Term]	FALSE	1	2	6	A0A7R8Z362	A0A7R8Z362 [6632-6644]		0	1695.9	0.949	0.766	0.807	74.2	78.1	96.8	28.83	16.35	18.62		High	High	High	High	High	High	High	High	High	High	High	High	High	High	High	High	High	High	High	High	High	High	High	High	High	High
	FALSE	High	[K].GPLEVSDVTAK.[G]	1xTMTpro [N-Term]; 1xTMTpro [K11]	FALSE	1	2	8	A0A7R8Z362	A0A7R8Z362 [2705-2715]		0	1724.01	1.321	1.365	1.033	139	105.2	101.8	17.22	9.99	12.25		High	High	High	High	High	High	High	High	High	High	High	High	High	High	High	High	High	High	High	High	High	High	High	High	High	High
	FALSE	High	[R].VFAQNEAGLSK.[E]	1xTMTpro [N-Term]; 1xTMTpro [K11]	FALSE	1	2	5	A0A7R8Z362	A0A7R8Z362 [7611-7621]		0	1772.02	0.916	0.935	1.021	93	101.5	99.4	13.83	14.87	9.36		High	High	High	High	High	High	High	High	High	High	High	High	High	High	High	High	High	High	High	High	High	High	High	High	High	High
	FALSE	High	[R].WVPVGDCADTSIR.[A]	1xTMTpro [N-Term]; 1xCarbamidomethyl [C7]	FALSE	1	2	5	A0A7R8Z362	A0A7R8Z362 [5411-5423]		0	1779.9	0.938	0.864	0.921	90.2	96.1	104.4	15.08	19.12	15.56		High	High	High	High	High	High	High	High	High	High	High	High	High	High	High	High	High	High	High	High	High	High	High	High	High	High
	FALSE	High	[K].AISSSEIMDLK.[Y]	1xTMTpro [N-Term]; 1xTMTpro [K11]	FALSE	1	2	6	A0A7R8Z362	A0A7R8Z362 [8688-8698]		0	1802.02	0.972	1.076	1.108	108.3	111.5	100.7	10.79	7.88	3.86		High	High	High	High	High	High	High	High	High	High	High	High	High	High	High	High	High	High	High	High	High	High	High	High	High	High
	FALSE	High	[K].AISSSEIMDLK.[Y]	1xTMTpro [N-Term]; 1xOxidation [M8]; 1xTMTpro [K11]	FALSE	1	2	2	A0A7R8Z362	A0A7R8Z362 [8688-8698]		0	1818.02	0.968	0.981	1.013	96.3	99.4	98.1	14.46	13.67	10.79		n/a	n/a	n/a	n/a	High	High	High	High	High	High	High	High	n/a	n/a	n/a	n/a	High	High	High	High	High	High	High	High	n/a	n/a
	FALSE	High	[K].YTVTASNEFGK.[D]	1xTMTpro [N-Term]; 1xTMTpro [K11]	FALSE	1	2	6	A0A7R8Z362	A0A7R8Z362 [6230-6240]		0	1825	1.042	1.09	1.046	107	102.7	98.2	15.01	13.08	7.51		High	High	High	High	High	High	High	High	High	High	High	High	High	High	High	High	High	High	High	High	High	High	High	High	High	High
	FALSE	High	[K].ALDVPAGQCNAK.[V]	1xTMTpro [N-Term]; 1xCarbamidomethyl [C9]; 1xTMTpro [K12]	FALSE	1	2	1	A0A7R8Z362	A0A7R8Z362 [4921-4932]		0	1852.02	0.756	0.976	1.29	93.1	123.1	95.4	10.12	44.29	30.7		n/a	n/a	n/a	n/a	n/a	n/a	n/a	n/a	High	High	High	High	n/a	n/a	n/a	n/a	n/a	n/a	n/a	n/a	High	High	High	High	n/a	n/a
	FALSE	High	[K].WSVDVSGEPAPK.[L]	1xTMTpro [N-Term]; 1xTMTpro [K12]	FALSE	1	2	5	A0A7R8Z362	A0A7R8Z362 [2625-2636]		0	1880.04	0.915	1.052	1.15	104.8	114.5	99.6	9.56	18.54	12.35		High	High	High	High	High	High	High	High	High	High	High	High	High	High	High	High	High	High	High	High	High	High	High	High	High	High
	FALSE	High	[K].VILSNSSGTVESK.[A]	1xTMTpro [N-Term]; 1xTMTpro [K13]	FALSE	1	2	4	A0A7R8Z362	A0A7R8Z362 [2381-2393]		0	1929.11	0.931	0.939	1.008	93.2	100.1	99.3	9.86	8.31	3.16		High	High	High	High	High	High	High	High	High	High	High	High	High	High	High	High	High	High	High	High	High	High	High	High	High	High
	FALSE	High	[K].VILSNSSGTVESK.[A]	1xTMTpro [N-Term]; 1xDeamidated [N5]; 1xTMTpro [K13]	FALSE	1	2	2	A0A7R8Z362	A0A7R8Z362 [2381-2393]		0	1930.1	1.057	1.366	1.292	133.7	126.4	97.8	12.54	11.05	13.28		High	High	High	High	n/a	n/a	n/a	n/a	High	High	High	High	High	High	High	High	n/a	n/a	n/a	n/a	High	High	High	High	High	High
	FALSE	High	[R].SDPLTSESPVVAK.[N]	1xTMTpro [N-Term]; 1xTMTpro [K13]	FALSE	1	2	2	A0A7R8Z362	A0A7R8Z362 [6038-6050]		0	1938.1	0.858	1.22	1.421	121.9	142	99.9	5.46	21.9	15.75		n/a	n/a	n/a	n/a	High	High	High	High	High	High	High	High	n/a	n/a	n/a	n/a	High	High	High	High	High	High	High	High	n/a	n/a
	FALSE	High	[K].VPNLLENHEYEFR.[V]	1xTMTpro [N-Term]	FALSE	1	2	7	A0A7R8Z362	A0A7R8Z362 [6810-6822]		0	1964.02	1.199	1.067	0.89	107.8	89.9	101	11.45	7.04	4.7		High	High	High	High	High	High	High	High	High	High	High	High	High	High	High	High	High	High	High	High	High	High	High	High	High	High
	FALSE	High	[K].VEDVFAEGCTLK.[W]	1xTMTpro [N-Term]; 1xCarbamidomethyl [C9]; 1xTMTpro [K12]	FALSE	1	2	4	A0A7R8Z362	A0A7R8Z362 [5076-5087]		0	1976.07	0.907	0.872	0.962	84.5	93.2	96.9	13.88	24.05	19.73		High	High	High	High	High	High	High	High	High	High	High	High	High	High	High	High	High	High	High	High	High	High	High	High	High	High
	FALSE	High	[K].NVTIDNVDYHTK.[M]	1xTMTpro [N-Term]; 1xTMTpro [K12]	FALSE	1	2	3	A0A7R8Z362	A0A7R8Z362 [4725-4736]		0	2027.11	0.941	1.034	1.1	106.5	113.2	102.9	5.67	12.89	11.1		High	High	High	High	High	High	High	High	n/a	n/a	n/a	n/a	High	High	High	High	High	High	High	High	n/a	n/a	n/a	n/a	High	High
	FALSE	High	[K].NVTIDNVDYHTK.[M]	1xTMTpro [N-Term]; 1xDeamidated [N6]; 1xTMTpro [K12]	FALSE	1	2	1	A0A7R8Z362	A0A7R8Z362 [4725-4736]		0	2028.09	0.833	0.978	1.175	102.9	123.6	105.2	12.46	16.05	16.75		n/a	n/a	n/a	n/a	High	High	High	High	n/a	n/a	n/a	n/a	n/a	n/a	n/a	n/a	High	High	High	High	n/a	n/a	n/a	n/a	n/a	n/a
	FALSE	High	[K].NPFDEPGKPGNLR.[A]	1xTMTpro [N-Term]; 1xTMTpro [K8]	FALSE	1	2	5	A0A7R8Z362	A0A7R8Z362 [4868-4880]		0	2049.14	0.782	1.087	1.39	108	138.1	99.4	9.22	17.79	4.39		High	High	High	High	High	High	High	High	High	High	High	High	High	High	High	High	High	High	High	High	High	High	High	High	High	High
	FALSE	High	[K].FDANIIGEPAPTVEWR.[F]	1xTMTpro [N-Term]	FALSE	1	2	3	A0A7R8Z362	A0A7R8Z362 [4699-4714]		0	2119.11	0.942	1.162	1.233	111.3	118.1	95.8	19.55	8.28	7.87		High	High	High	High	High	High	High	High	High	High	High	High	High	High	High	High	High	High	High	High	High	High	High	High	High	High
	FALSE	High	[K].SSSLSLSTSSDVGSTK.[K]	1xTMTpro [N-Term]; 1xTMTpro [K16]	FALSE	1	2	3	A0A7R8Z362	A0A7R8Z362 [8600-8615]		0	2151.16	0.823	0.738	0.896	70.6	85.8	95.8	11.1	17.79	14.95		High	High	High	High	High	High	High	High	High	High	High	High	High	High	High	High	High	High	High	High	High	High	High	High	High	High
	FALSE	High	[K].AVETQGPTCTGVVPK.[L]	1xTMTpro [N-Term]; 1xCarbamidomethyl [C9]; 1xTMTpro [K15]	FALSE	1	2	4	A0A7R8Z362	A0A7R8Z362 [3447-3461]		0	2152.19	0.936	0.851	0.909	84.9	90.8	99.8	16.26	19.39	12.3		High	High	High	High	High	High	High	High	High	High	High	High	High	High	High	High	High	High	High	High	High	High	High	High	High	High
	FALSE	High	[K].EVPADAFQATVDGLK.[E]	1xTMTpro [N-Term]; 1xTMTpro [K15]	FALSE	1	2	2	A0A7R8Z362	A0A7R8Z362 [2257-2271]		0	2169.2	1.098	0.938	0.855	87.5	79.7	93.3	8.77	4.81	24.04		High	High	High	High	High	High	High	High	n/a	n/a	n/a	n/a	High	High	High	High	High	High	High	High	n/a	n/a	n/a	n/a	High	High
	FALSE	High	[R].GTWTDAGMSTTTAHDVSR.[L]	1xTMTpro [N-Term]	FALSE	1	2	3	A0A7R8Z362	A0A7R8Z362 [5703-5720]		0	2198.05	0.849	1.018	1.199	98.3	115.8	96.5	18.23	28.16	16.5		High	High	High	High	High	High	High	High	High	High	High	High	High	High	High	High	High	High	High	High	High	High	High	High	High	High
	FALSE	High	[K].GPLEVSDVTAEGVHLK.[W]	1xTMTpro [N-Term]; 1xTMTpro [K16]	FALSE	1	2	6	A0A7R8Z362	A0A7R8Z362 [3893-3908]		0	2259.28	1.34	1.449	1.081	142.1	106	98	18.12	16.42	10.16		High	High	High	High	High	High	High	High	High	High	High	High	High	High	High	High	High	High	High	High	High	High	High	High	High	High
	FALSE	High	[K].NPYNAPDTPGKPEFR.[D]	1xTMTpro [N-Term]; 1xTMTpro [K11]	FALSE	1	2	8	A0A7R8Z362	A0A7R8Z362 [3983-3997]		0	2311.23	0.901	1.082	1.201	106	117.7	98	22.01	19.64	10.28		High	High	High	High	High	High	High	High	High	High	High	High	High	High	High	High	High	High	High	High	High	High	High	High	High	High
	FALSE	High	[R].LEITNVVNGDKGEYR.[A]	1xTMTpro [N-Term]; 1xDeamidated [N8]; 1xTMTpro [K11]	FALSE	1	2	5	A0A7R8Z362	A0A7R8Z362 [288-302]		1	2316.27	1.319	1.057	0.802	104.3	79.1	98.7	12.4	11.98	5.71		High	High	High	High	High	High	High	High	High	High	High	High	High	High	High	High	High	High	High	High	High	High	High	High	High	High
	FALSE	High	[K].LNKDPVPGNDYNDDR.[V]	1xTMTpro [N-Term]; 1xTMTpro [K3]	FALSE	1	2	2	A0A7R8Z362	A0A7R8Z362 [6105-6119]		1	2340.21	0.89	1.122	1.261	110.6	124.3	98.6	27.87	20.48	34.48		n/a	n/a	n/a	n/a	High	High	High	High	High	High	High	High	n/a	n/a	n/a	n/a	High	High	High	High	High	High	High	High	n/a	n/a
	FALSE	High	[K].STSVGEDLYELTLEIK.[D]	1xTMTpro [N-Term]; 1xTMTpro [K16]	FALSE	1	2	3	A0A7R8Z362	A0A7R8Z362 [487-502]		0	2405.33	1.426	0.975	0.683	94.1	66	96.6	15.09	24.5	9.51		High	High	High	High	High	High	High	High	High	High	High	High	High	High	High	High	High	High	High	High	High	High	High	High	High	High
	FALSE	High	[R].VMAVNENGMGPPLEGLNPIR.[A]	1xTMTpro [N-Term]	FALSE	1	2	2	A0A7R8Z362	A0A7R8Z362 [7510-7529]		0	2412.27	1.184	0.951	0.804	97.9	82.7	102.9	7	6.41	6.97		n/a	n/a	n/a	n/a	High	High	High	High	High	High	High	High	n/a	n/a	n/a	n/a	High	High	High	High	High	High	High	High	n/a	n/a
	FALSE	High	[R].VMAVNENGMGPPLEGLNPIR.[A]	1xTMTpro [N-Term]; 1xDeamidated [N7]	FALSE	1	2	21	A0A7R8Z362	A0A7R8Z362 [7510-7529]		0	2413.25	1.125	0.965	0.858	96.9	86.2	100.4	7.25	15.36	5.16		High	High	High	High	High	High	High	High	High	High	High	High	High	High	High	High	High	High	High	High	High	High	High	High	High	High
	FALSE	High	[R].VMAVNENGMGPPLEGLNPIR.[A]	1xTMTpro [N-Term]; 2xDeamidated [N5; N7]	FALSE	1	2	1	A0A7R8Z362	A0A7R8Z362 [7510-7529]		0	2414.24										No Quan Values	n/a	n/a	n/a	n/a	n/a	n/a	n/a	n/a	High	High	High	High	n/a	n/a	n/a	n/a	n/a	n/a	n/a	n/a	High	High	High	High	n/a	n/a
	FALSE	High	[R].VMAVNENGMGPPLEGLNPIR.[A]	1xTMTpro [N-Term]; 1xOxidation [M2]; 1xDeamidated [N7]	FALSE	1	2	1	A0A7R8Z362	A0A7R8Z362 [7510-7529]		0	2429.25	1.051	0.832	0.792	85.4	81.3	102.7	8.79	14.37	12.7		n/a	n/a	n/a	n/a	High	High	High	High	n/a	n/a	n/a	n/a	n/a	n/a	n/a	n/a	High	High	High	High	n/a	n/a	n/a	n/a	n/a	n/a
	FALSE	High	[R].EPHAEINNLVPGQEYK.[F]	1xTMTpro [N-Term]; 1xTMTpro [K16]	FALSE	1	2	3	A0A7R8Z362	A0A7R8Z362 [4238-4253]		0	2446.32	0.986	1.128	1.144	111.7	113.3	99	14.29	15.35	2.52		High	High	High	High	High	High	High	High	High	High	High	High	High	High	High	High	High	High	High	High	High	High	High	High	High	High
	FALSE	High	[R].AVNAAGPGEPSDCTPPITAK.[A]	1xTMTpro [N-Term]; 1xCarbamidomethyl [C13]; 1xTMTpro [K20]	FALSE	1	2	2	A0A7R8Z362	A0A7R8Z362 [4948-4967]		0	2561.35	1.09	0.954	0.876	96.1	88.2	100.7	3.48	5.69	16.75		High	High	High	High	High	High	High	High	n/a	n/a	n/a	n/a	High	High	High	High	High	High	High	High	n/a	n/a	n/a	n/a	High	High
	FALSE	High	[K].LVLEVELQDQTAPADWK.[F]	1xTMTpro [N-Term]; 1xTMTpro [K17]	FALSE	1	2	3	A0A7R8Z362	A0A7R8Z362 [1933-1949]		0	2563.43	1.151	1.071	0.931	105.5	91.7	98.5	9.29	5.31	4.42		High	High	High	High	High	High	High	High	n/a	n/a	n/a	n/a	High	High	High	High	High	High	High	High	n/a	n/a	n/a	n/a	High	High
	FALSE	High	[K].LEINEVQDTDKGSYK.[V]	1xTMTpro [N-Term]; 2xTMTpro [K11; K15]	FALSE	1	2	4	A0A7R8Z362	A0A7R8Z362 [701-715]		1	2651.47	2.645	1.281	0.484	116.4	44	90.8	28.72	29.19	20.29		High	High	High	High	High	High	High	High	High	High	High	High	High	High	High	High	High	High	High	High	High	High	High	High	High	High
	FALSE	High	[K].VVFTNEAGTDESSAQITVTK.[K]	1xTMTpro [N-Term]; 1xTMTpro [K20]	FALSE	1	2	8	A0A7R8Z362	A0A7R8Z362 [818-837]		0	2705.45	1.541	1.111	0.721	110.4	71.7	99.3	3.4	7.66	6.61		High	High	High	High	High	High	High	High	High	High	High	High	High	High	High	High	High	High	High	High	High	High	High	High	High	High
	FALSE	High	[K].WSPPSDDGGQPVENYVVEK.[M]	1xTMTpro [N-Term]; 1xTMTpro [K19]	FALSE	1	2	8	A0A7R8Z362	A0A7R8Z362 [5088-5106]		0	2711.38	0.592	1.037	1.75	103.6	174.9	99.9	20.93	33.85	9.27		High	High	High	High	High	High	High	High	High	High	High	High	High	High	High	High	High	High	High	High	High	High	High	High	High	High
	FALSE	High	[K].WSPPSDDGGQPVENYVVEK.[M]	1xTMTpro [N-Term]; 1xDeamidated [Q10]; 1xTMTpro [K19]	FALSE	1	2	1	A0A7R8Z362	A0A7R8Z362 [5088-5106]		0	2712.36	1.116	1.038	0.93	103.3	92.6	99.5	13.37	15	13.58		n/a	n/a	n/a	n/a	High	High	High	High	n/a	n/a	n/a	n/a	n/a	n/a	n/a	n/a	High	High	High	High	n/a	n/a	n/a	n/a	n/a	n/a
	FALSE	High	[K].DVNIIMQDVPTPPQDVDVK.[E]	1xTMTpro [N-Term]; 1xTMTpro [K19]	FALSE	1	2	9	A0A7R8Z362	A0A7R8Z362 [2094-2112]		0	2731.48	1.016	1.264	1.244	127.6	125.6	101	11.29	6.89	17.06		High	High	High	High	High	High	High	High	High	High	High	High	High	High	High	High	High	High	High	High	High	High	High	High	High	High
	FALSE	High	[K].DVNIIMQDVPTPPQDVDVK.[E]	1xTMTpro [N-Term]; 1xDeamidated [Q7]; 1xTMTpro [K19]	FALSE	1	2	2	A0A7R8Z362	A0A7R8Z362 [2094-2112]		0	2732.47										No Quan Values	High	High	High	High	n/a	n/a	n/a	n/a	High	High	High	High	High	High	High	High	n/a	n/a	n/a	n/a	High	High	High	High	High	High
	FALSE	High	[K].KPLDDGGEPIDGYLVEK.[F]	1xTMTpro [N-Term]; 2xTMTpro [K1; K17]	FALSE	1	2	5	A0A7R8Z362	A0A7R8Z362 [4501-4517]		0	2757.55	0.941	0.95	1.009	95.6	101.5	100.6	16.23	24.93	17.21		High	High	High	High	High	High	High	High	High	High	High	High	High	High	High	High	High	High	High	High	High	High	High	High	High	High
	FALSE	High	[K].WNPPLDDGGVPVDHYLIEK.[M]	1xTMTpro [N-Term]; 1xTMTpro [K19]	FALSE	1	2	6	A0A7R8Z362	A0A7R8Z362 [4204-4222]		0	2772.49	1.339	0.994	0.742	93.7	69.9	94.2	10.57	13.99	22.16		High	High	High	High	High	High	High	High	High	High	High	High	High	High	High	High	High	High	High	High	High	High	High	High	High	High
	FALSE	High	[K].STEPEASITGLQEGKPYK.[F]	1xTMTpro [N-Term]; 2xTMTpro [K15; K18]	FALSE	1	2	1	A0A7R8Z362	A0A7R8Z362 [3646-3663]		0	2847.59	1.079	0.903	0.836	85.4	79.1	94.6	15.87	13.1	22.15		n/a	n/a	n/a	n/a	High	High	High	High	n/a	n/a	n/a	n/a	n/a	n/a	n/a	n/a	High	High	High	High	n/a	n/a	n/a	n/a	n/a	n/a
	FALSE	High	[K].VTVVDVPTPPEGPIRPEEVTK.[N]	1xTMTpro [N-Term]; 1xTMTpro [K21]	FALSE	1	2	5	A0A7R8Z362	A0A7R8Z362 [5358-5378]		0	2867.64	0.817	1.136	1.391	110.7	135.4	97.4	20.39	26.89	16.88		High	High	High	High	High	High	High	High	High	High	High	High	High	High	High	High	High	High	High	High	High	High	High	High	High	High
	FALSE	High	[R].IIAVNQAGQSEPSEPSDMIMAK.[A]	1xTMTpro [N-Term]; 1xTMTpro [K22]	FALSE	1	2	9	A0A7R8Z362	A0A7R8Z362 [5832-5853]		0	2924.54	0.898	1.044	1.163	103.8	115.5	99.4	6.97	13.29	9		High	High	High	High	High	High	High	High	High	High	High	High	High	High	High	High	High	High	High	High	High	High	High	High	High	High
	FALSE	High	[R].AGEPINIDIPLSGAPTPTVEWQK.[A]	1xTMTpro [N-Term]; 1xTMTpro [K23]	FALSE	1	2	6	A0A7R8Z362	A0A7R8Z362 [6173-6195]		0	3041.68	1.224	0.86	0.702	82.4	67.3	95.9	30.01	34.99	19.03		High	High	High	High	High	High	High	High	High	High	High	High	High	High	High	High	High	High	High	High	High	High	High	High	High	High
	FALSE	High	[R].AGEPINIDIPLSGAPTPTVEWQK.[A]	1xTMTpro [N-Term]; 1xPhospho [T16]; 1xTMTpro [K23]	FALSE	1	2	6	A0A7R8Z362	A0A7R8Z362 [6173-6195]	A0A7R8Z362 1xPhospho [T6188]	0	3121.65	1.318	0.833	0.632	82.3	62.4	98.8	35.92	9.42	18.46		High	High	High	High	High	High	High	High	High	High	High	High	High	High	High	High	High	High	High	High	High	High	High	High	High	High
	FALSE	High	[R].TSPTDTELDVKGLTEGHEYQFR.[V]	1xTMTpro [N-Term]; 1xTMTpro [K11]	FALSE	1	2	1	A0A7R8Z362	A0A7R8Z362 [3052-3073]		1	3131.61	0.849	0.972	1.144	98.9	116.4	101.7	12.31	16.23	17.21		High	High	High	High	n/a	n/a	n/a	n/a	n/a	n/a	n/a	n/a	High	High	High	High	n/a	n/a	n/a	n/a	n/a	n/a	n/a	n/a	High	High
	FALSE	High	[R].GDSGEYTVTATNSSGKDTVTIK.[V]	1xTMTpro [N-Term]; 2xTMTpro [K16; K22]	FALSE	1	2	2	A0A7R8Z362	A0A7R8Z362 [4745-4766]		1	3143.69	1.032	1.352	1.31	118.7	114.9	87.7	49.1	67.39	27.81		n/a	n/a	n/a	n/a	High	High	High	High	High	High	High	High	n/a	n/a	n/a	n/a	High	High	High	High	High	High	High	High	n/a	n/a
	FALSE	High	[R].GDSGEYTVTATNSSGKDTVTIK.[V]	1xTMTpro [N-Term]; 1xDeamidated [N12]; 2xTMTpro [K16; K22]	FALSE	1	2	2	A0A7R8Z362	A0A7R8Z362 [4745-4766]		1	3144.67	0.882	1.064	1.206	107.9	122.4	101.4	26	30.14	11.38		n/a	n/a	n/a	n/a	High	High	High	High	High	High	High	High	n/a	n/a	n/a	n/a	High	High	High	High	High	High	High	High	n/a	n/a
	FALSE	High	[K].WDKPEDDGGAPIDYYEIEK.[L]	1xTMTpro [N-Term]; 2xTMTpro [K3; K19]	FALSE	1	2	6	A0A7R8Z362	A0A7R8Z362 [3614-3632]		0	3152.62	0.923	0.833	0.902	87.4	94.7	105	19.36	20.05	20.05		High	High	High	High	High	High	High	High	High	High	High	High	High	High	High	High	High	High	High	High	High	High	High	High	High	High
	FALSE	High	[R].VKAVNEEGESEPLETESAIVAK.[N]	1xTMTpro [N-Term]; 2xTMTpro [K2; K22]	FALSE	1	2	4	A0A7R8Z362	A0A7R8Z362 [3371-3392]		1	3241.8	0.948	1.298	1.37	129.3	136.5	99.6	21.55	17.8	16.01		High	High	High	High	High	High	High	High	High	High	High	High	High	High	High	High	High	High	High	High	High	High	High	High	High	High
	FALSE	High	[R].VKAINEEGESEPLETDGSIIAK.[N]	1xTMTpro [N-Term]; 2xTMTpro [K2; K22]	FALSE	1	2	2	A0A7R8Z362	A0A7R8Z362 [3074-3095]		1	3241.8	0.807	1.053	1.304	99.7	123.5	94.7	19.98	16.52	15.94		High	High	High	High	High	High	High	High	n/a	n/a	n/a	n/a	High	High	High	High	High	High	High	High	n/a	n/a	n/a	n/a	High	High
	FALSE	High	[K].VTEVGDDFVHLEWEKPEYDGGAR.[I]	1xTMTpro [N-Term]; 1xTMTpro [K15]	FALSE	1	2	2	A0A7R8Z362	A0A7R8Z362 [7545-7567]		0	3256.64	0.969	1.252	1.292	123.8	127.7	98.8	5.98	16.35	8.93		High	High	High	High	n/a	n/a	n/a	n/a	n/a	n/a	n/a	n/a	High	High	High	High	n/a	n/a	n/a	n/a	n/a	n/a	n/a	n/a	High	High
	FALSE	High	[K].STSVGEDLYELTLEIKDPGAADGGTYR.[C]	1xTMTpro [N-Term]; 1xTMTpro [K16]	FALSE	1	2	3	A0A7R8Z362	A0A7R8Z362 [487-513]		1	3465.79	1.55	1.054	0.68	97.1	62.7	92.2	22.41	7.58	21.28		High	High	High	High	High	High	High	High	High	High	High	High	High	High	High	High	High	High	High	High	High	High	High	High	High	High
	FALSE	High	[K].ISNGQGEDVKDVNIIMQDVPTPPQDVDVK.[E]	1xTMTpro [N-Term]; 1xDeamidated [N3]; 2xTMTpro [K10; K29]	FALSE	1	2	8	A0A7R8Z362	A0A7R8Z362 [2084-2112]		1	4064.17	1.215	1.161	0.956	112.6	92.7	97	22.75	21.79	8.75		High	High	High	High	High	High	High	High	High	High	High	High	High	High	High	High	High	High	High	High	High	High	High	High	High	High
	FALSE	High	[K].ISNGQGEDVKDVNIIMQDVPTPPQDVDVK.[E]	1xTMTpro [N-Term]; 2xTMTpro [K10; K29]; 2xDeamidated [Q17; N/Q]	FALSE	1	2	2	A0A7R8Z362	A0A7R8Z362 [2084-2112]		1	4065.15										No Quan Values	n/a	n/a	n/a	n/a	n/a	n/a	n/a	n/a	High	High	High	High	n/a	n/a	n/a	n/a	n/a	n/a	n/a	n/a	High	High	High	High	n/a	n/a
	FALSE	High	[K].IGGLTPGHK.[Y]	1xTMTpro [N-Term]; 1xTMTpro [K9]	FALSE	1	2	4	A0A7R8Z362	A0A7R8Z362 [5129-5137]		0	1487.92	0.798	0.92	1.153	91.8	115	99.8	18.44	10.87	12.67		High	High	High	High	High	High	High	High	High	High	High	High	High	High	High	High	High	High	High	High	High	High	High	High	High	High
	FALSE	High	[R].DIGGALWVK.[C]	1xTMTpro [N-Term]; 1xTMTpro [K9]	FALSE	1	2	1	A0A7R8Z362	A0A7R8Z362 [7186-7194]		0	1566.95	1.227	1.211	0.987	120.6	98.3	99.6	21.7	14.61	9.85		n/a	n/a	n/a	n/a	n/a	n/a	n/a	n/a	High	High	High	High	n/a	n/a	n/a	n/a	n/a	n/a	n/a	n/a	High	High	High	High	n/a	n/a
	FALSE	High	[R].LSDTVAPMGK.[Y]	1xTMTpro [N-Term]; 1xTMTpro [K10]	FALSE	1	2	2	A0A7R8Z362	A0A7R8Z362 [7255-7264]		0	1626.94	0.887	1.076	1.212	104.6	117.8	97.2	3.48	19.05	12.52		High	High	High	High	n/a	n/a	n/a	n/a	High	High	High	High	High	High	High	High	n/a	n/a	n/a	n/a	High	High	High	High	High	High
	FALSE	High	[R].SQTGQYTIK.[A]	1xTMTpro [N-Term]; 1xTMTpro [K9]	FALSE	1	2	3	A0A7R8Z362	A0A7R8Z362 [4155-4163]		0	1633.94	0.576	0.684	1.186	66.3	115	97	26.39	46.58	37.13		High	High	High	High	High	High	High	High	High	High	High	High	High	High	High	High	High	High	High	High	High	High	High	High	High	High
	FALSE	High	[R].YVGDDYYFVINR.[V]	1xTMTpro [N-Term]	FALSE	1	2	2	A0A7R8Z362	A0A7R8Z362 [8354-8365]		0	1827.92	1.144	0.946	0.827	97.5	85.2	103	10.91	13.6	23.84		High	High	High	High	n/a	n/a	n/a	n/a	High	High	High	High	High	High	High	High	n/a	n/a	n/a	n/a	High	High	High	High	High	High
	FALSE	High	[R].TVIIECTVASK.[F]	1xTMTpro [N-Term]; 1xCarbamidomethyl [C6]; 1xTMTpro [K11]	FALSE	1	2	2	A0A7R8Z362	A0A7R8Z362 [655-665]		0	1829.07	1.217	0.929	0.763	92.4	75.9	99.4	3.98	13.46	9.24		High	High	High	High	High	High	High	High	n/a	n/a	n/a	n/a	High	High	High	High	High	High	High	High	n/a	n/a	n/a	n/a	High	High
	FALSE	High	[K].APFDPPGPPGVPK.[V]	1xTMTpro [N-Term]; 1xTMTpro [K13]	FALSE	1	2	7	A0A7R8Z362	A0A7R8Z362 [7532-7544]		0	1884.09	0.995	1.225	1.231	124.3	124.9	101.4	16.86	13.84	7.65		High	High	High	High	High	High	High	High	High	High	High	High	High	High	High	High	High	High	High	High	High	High	High	High	High	High
	FALSE	High	[M].GVAEDFAPSFIK.[K]	1xTMTpro [N-Term]; 1xTMTpro [K12]	FALSE	1	2	8	A0A7R8Z362	A0A7R8Z362 [2-13]		0	1889.07	1.747	1.192	0.682	117.7	67.4	98.7	17.17	14.76	2.45		High	High	High	High	High	High	High	High	High	High	High	High	High	High	High	High	High	High	High	High	High	High	High	High	High	High
	FALSE	High	[R].IIPNDSGTLITMK.[C]	1xTMTpro [N-Term]; 1xTMTpro [K13]	FALSE	1	2	3	A0A7R8Z362	A0A7R8Z362 [445-457]		0	2011.18	1.717	1.175	0.684	111.4	64.9	94.8	24.09	14.04	14.8		High	High	High	High	High	High	High	High	High	High	High	High	High	High	High	High	High	High	High	High	High	High	High	High	High	High
	FALSE	High	[K].SDGGAPITGYVIEK.[K]	1xTMTpro [N-Term]; 1xTMTpro [K14]	FALSE	1	2	1	A0A7R8Z362	A0A7R8Z362 [3126-3139]		0	2015.13	1.07	0.866	0.81	88.3	82.5	101.9	4.15	11.98	16.03		n/a	n/a	n/a	n/a	High	High	High	High	n/a	n/a	n/a	n/a	n/a	n/a	n/a	n/a	High	High	High	High	n/a	n/a	n/a	n/a	n/a	n/a
	FALSE	High	[K].YPFTVPDPPGQPK.[V]	1xTMTpro [N-Term]; 1xTMTpro [K13]	FALSE	1	2	2	A0A7R8Z362	A0A7R8Z362 [7040-7052]		0	2051.15	1.017	1.09	1.072	102.2	100.5	93.8	7.49	9.8	14.83		n/a	n/a	n/a	n/a	High	High	High	High	n/a	n/a	n/a	n/a	n/a	n/a	n/a	n/a	High	High	High	High	n/a	n/a	n/a	n/a	n/a	n/a
	FALSE	High	[K].FDPDTGIWLPVGK.[S]	1xTMTpro [N-Term]; 1xTMTpro [K13]	FALSE	1	2	5	A0A7R8Z362	A0A7R8Z362 [4518-4530]		0	2053.16	0.872	0.873	1.001	89.2	102.2	102.1	12.42	19.02	21.33		High	High	High	High	High	High	High	High	High	High	High	High	High	High	High	High	High	High	High	High	High	High	High	High	High	High
	FALSE	High	[R].WVPAGETDGPVTSLK.[I]	1xTMTpro [N-Term]; 1xTMTpro [K15]	FALSE	1	2	6	A0A7R8Z362	A0A7R8Z362 [5114-5128]		0	2165.21	0.735	0.99	1.346	97.2	132.2	98.2	36.81	21.02	16.21		High	High	High	High	High	High	High	High	High	High	High	High	High	High	High	High	High	High	High	High	High	High	High	High	High	High
	FALSE	High	[R].YDILEEIGTGAFGVVHR.[C]	1xTMTpro [N-Term]	FALSE	1	2	6	A0A7R8Z362	A0A7R8Z362 [7981-7997]		0	2180.17	0.93	0.86	0.925	90.9	97.7	105.7	14.22	5.96	13.31		High	High	High	High	High	High	High	High	High	High	High	High	High	High	High	High	High	High	High	High	High	High	High	High	High	High
	FALSE	High	[R].IFQNLTDDSASLVMK.[N]	1xTMTpro [N-Term]; 1xTMTpro [K15]	FALSE	1	2	3	A0A7R8Z362	A0A7R8Z362 [6602-6616]		0	2290.26	0.639	0.816	1.277	77.8	121.7	95.3	22.08	61.57	40.36		High	High	High	High	High	High	High	High	High	High	High	High	High	High	High	High	High	High	High	High	High	High	High	High	High	High
	FALSE	High	[R].IFQNLTDDSASLVMK.[N]	1xTMTpro [N-Term]; 1xDeamidated [N/Q]; 1xTMTpro [K15]	FALSE	1	2	4	A0A7R8Z362	A0A7R8Z362 [6602-6616]		0	2291.24	1.23	1.207	0.981	106.5	86.6	88.2	31.42	9.08	34.8		High	High	High	High	High	High	High	High	n/a	n/a	n/a	n/a	High	High	High	High	High	High	High	High	n/a	n/a	n/a	n/a	High	High
	FALSE	High	[K].WPAPISNGGSPIIGYDVER.[R]	1xTMTpro [N-Term]; 1xDeamidated [N7]	FALSE	1	2	1	A0A7R8Z362	A0A7R8Z362 [6076-6094]		0	2333.21	0.98	1.068	1.09	105.9	108	99.2	4.21	11.74	7.7		High	High	High	High	n/a	n/a	n/a	n/a	n/a	n/a	n/a	n/a	High	High	High	High	n/a	n/a	n/a	n/a	n/a	n/a	n/a	n/a	High	High
	FALSE	High	[K].IYYSGDQPMDVTLTK.[D]	1xTMTpro [N-Term]; 1xTMTpro [K15]	FALSE	1	2	7	A0A7R8Z362	A0A7R8Z362 [7363-7377]		0	2339.24	1.084	1.035	0.954	95.2	87.8	92.1	25.35	5.82	21.68		High	High	High	High	High	High	High	High	High	High	High	High	High	High	High	High	High	High	High	High	High	High	High	High	High	High
	FALSE	High	[K].IYYSGDQPMDVTLTK.[D]	1xTMTpro [N-Term]; 1xOxidation [M9]; 1xTMTpro [K15]	FALSE	1	2	1	A0A7R8Z362	A0A7R8Z362 [7363-7377]		0	2355.24	1.016	0.972	0.956	95.7	94.1	98.4	7.15	8.4	16.99		High	High	High	High	n/a	n/a	n/a	n/a	n/a	n/a	n/a	n/a	High	High	High	High	n/a	n/a	n/a	n/a	n/a	n/a	n/a	n/a	High	High
	FALSE	High	[K].DLSHIVQGLTENQEYLFR.[V]	1xTMTpro [N-Term]	FALSE	1	2	3	A0A7R8Z362	A0A7R8Z362 [7492-7509]		0	2466.29	1.039	0.901	0.867	81.7	78.6	90.7	17.45	19.73	22.26		High	High	High	High	High	High	High	High	High	High	High	High	High	High	High	High	High	High	High	High	High	High	High	High	High	High
	FALSE	High	[R].GIESTEDSITIAWTKPR.[H]	1xTMTpro [N-Term]; 1xTMTpro [K15]	FALSE	1	2	17	A0A7R8Z362	A0A7R8Z362 [6757-6773]		0	2512.39	0.976	1.178	1.208	116.5	119.4	98.9	12.32	18.3	6.65		High	High	High	High	High	High	High	High	High	High	High	High	High	High	High	High	High	High	High	High	High	High	High	High	High	High
	FALSE	High	[R].WIPAGECGPNDDSFTFK.[G]	1xTMTpro [N-Term]; 1xCarbamidomethyl [C7]; 1xTMTpro [K17]	FALSE	1	2	6	A0A7R8Z362	A0A7R8Z362 [2449-2465]		0	2549.26	1.006	0.91	0.905	91.1	90.6	100.1	15.93	20.07	16.85		High	High	High	High	High	High	High	High	High	High	High	High	High	High	High	High	High	High	High	High	High	High	High	High	High	High
	FALSE	High	[R].WIPAGECGPNDDSFTFK.[G]	1xTMTpro [N-Term]; 1xCarbamidomethyl [C7]; 1xDeamidated [N10]; 1xTMTpro [K17]	FALSE	1	2	2	A0A7R8Z362	A0A7R8Z362 [2449-2465]		0	2550.25	0.981	0.969	0.988	96	97.9	99.1	13.38	12.92	14.8		n/a	n/a	n/a	n/a	n/a	n/a	n/a	n/a	High	High	High	High	n/a	n/a	n/a	n/a	n/a	n/a	n/a	n/a	High	High	High	High	n/a	n/a
	FALSE	High	[R].IENEDYNTKLTLLNTTR.[G]	1xTMTpro [N-Term]; 1xTMTpro [K9]	FALSE	1	2	3	A0A7R8Z362	A0A7R8Z362 [3251-3267]		1	2646.46	1.16	2.352	2.027	232.6	200.5	98.9	38.78	27.36	36.73		High	High	High	High	High	High	High	High	High	High	High	High	High	High	High	High	High	High	High	High	High	High	High	High	High	High
	FALSE	High	[R].AGQTFEWDVPVIGEPPPSK.[E]	1xTMTpro [N-Term]; 1xTMTpro [K19]	FALSE	1	2	7	A0A7R8Z362	A0A7R8Z362 [5284-5302]		0	2662.44	0.902	1.012	1.121	97.8	108.4	96.6	11.56	9.59	14.77		High	High	High	High	High	High	High	High	High	High	High	High	High	High	High	High	High	High	High	High	High	High	High	High	High	High
	FALSE	High	[R].VTAINSEGDSEPLETLVGVVAK.[D]	1xTMTpro [N-Term]; 1xTMTpro [K22]	FALSE	1	2	3	A0A7R8Z362	A0A7R8Z362 [2777-2798]		0	2836.58	1.091	0.954	0.874	94.5	86.6	99	5.15	9.83	29.09		High	High	High	High	n/a	n/a	n/a	n/a	High	High	High	High	High	High	High	High	n/a	n/a	n/a	n/a	High	High	High	High	High	High
	FALSE	High	[R].AVNAAGPGAPSEASKPVITKPR.[K]	1xTMTpro [N-Term]; 2xTMTpro [K15; K20]	FALSE	1	2	1	A0A7R8Z362	A0A7R8Z362 [4359-4380]		0	3030.79	0.753	0.977	1.297	98.6	131	101	23.64	22.98	18.57		n/a	n/a	n/a	n/a	High	High	High	High	n/a	n/a	n/a	n/a	n/a	n/a	n/a	n/a	High	High	High	High	n/a	n/a	n/a	n/a	n/a	n/a
	FALSE	High	[R].VAAENIYGVSEPLEGKPVVAK.[S]	1xTMTpro [N-Term]; 2xTMTpro [K16; K21]	FALSE	1	2	4	A0A7R8Z362	A0A7R8Z362 [6327-6347]		0	3082.8	1.042	0.863	0.828	89.4	85.8	103.6	36.29	33.98	18.81		High	High	High	High	High	High	High	High	High	High	High	High	High	High	High	High	High	High	High	High	High	High	High	High	High	High
	FALSE	High	[K].NPFDPPAPPGLPELEDWNEHMVK.[L]	1xTMTpro [N-Term]; 1xTMTpro [K23]	FALSE	1	2	8	A0A7R8Z362	A0A7R8Z362 [3393-3415]		0	3237.65	0.757	1.023	1.352	103.6	136.9	101.2	11.18	16.19	10.48		High	High	High	High	High	High	High	High	High	High	High	High	High	High	High	High	High	High	High	High	High	High	High	High	High	High
	FALSE	High	[R].LPGDKEPPEFDVTGLNPGSEYK.[F]	1xTMTpro [N-Term]; 2xTMTpro [K5; K22]	FALSE	1	2	3	A0A7R8Z362	A0A7R8Z362 [2753-2774]		1	3301.78	0.968	1.33	1.374	133.6	138	100.4	11.14	15.44	16.27		High	High	High	High	High	High	High	High	High	High	High	High	High	High	High	High	High	High	High	High	High	High	High	High	High	High
	FALSE	High	[R].AVNKAGPSEPSEQTNWHTAKPR.[F]	1xTMTpro [N-Term]; 2xTMTpro [K4; K20]	FALSE	1	2	2	A0A7R8Z362	A0A7R8Z362 [3474-3495]		1	3317.82	0.779	1.007	1.292	97.2	124.8	96.6	42.66	29.54	36.18		High	High	High	High	High	High	High	High	n/a	n/a	n/a	n/a	High	High	High	High	High	High	High	High	n/a	n/a	n/a	n/a	High	High
	FALSE	High	[R].AVNKAGPSEPSEQTNWHTAKPR.[F]	1xTMTpro [N-Term]; 2xTMTpro [K4; K20]; 1xDeamidated [Q13]	FALSE	1	2	1	A0A7R8Z362	A0A7R8Z362 [3474-3495]		1	3318.8	0.78	0.957	1.226	98.3	126	102.8	36.43	26.39	37.44		n/a	n/a	n/a	n/a	n/a	n/a	n/a	n/a	High	High	High	High	n/a	n/a	n/a	n/a	n/a	n/a	n/a	n/a	High	High	High	High	n/a	n/a
	FALSE	High	[R].FGGWEKALEVPASVTSARVPDLTENEEYEFR.[I]	1xTMTpro [N-Term]; 1xTMTpro [K6]	FALSE	1	2	1	A0A7R8Z362	A0A7R8Z362 [5506-5536]		2	4135.13	0.869	0.943	1.085	92.1	105.9	97.6	12.08	14.58	9.25		High	High	High	High	n/a	n/a	n/a	n/a	n/a	n/a	n/a	n/a	High	High	High	High	n/a	n/a	n/a	n/a	n/a	n/a	n/a	n/a	High	High
	FALSE	High	[R].AGQTFEWDVPVIGEPPPSKEWSHGDDMVINNDR.[V]	1xTMTpro [N-Term]; 1xTMTpro [K19]	FALSE	1	2	3	A0A7R8Z362	A0A7R8Z362 [5284-5316]		1	4331.13	0.872	0.972	1.114	98.4	112.8	101.3	8.4	22.5	17.09		High	High	High	High	High	High	High	High	High	High	High	High	High	High	High	High	High	High	High	High	High	High	High	High	High	High
	FALSE	High	[R].VIAVNEVGPSDPSKPSNPIVIEEQPNKPCMDLGGVR.[D]	1xTMTpro [N-Term]; 2xTMTpro [K14; K27]; 1xCarbamidomethyl [C29]	FALSE	1	2	1	A0A7R8Z362	A0A7R8Z362 [6527-6562]		0	4755.56	1.205	1.066	0.885	106.5	88.4	99.9	11.06	14.64	3.18		n/a	n/a	n/a	n/a	n/a	n/a	n/a	n/a	High	High	High	High	n/a	n/a	n/a	n/a	n/a	n/a	n/a	n/a	High	High	High	High	n/a	n/a
	FALSE	High	[R].VIAVNEVGPSDPSKPSNPIVIEEQPNKPCMDLGGVR.[D]	1xTMTpro [N-Term]; 2xTMTpro [K14; K27]; 1xDeamidated [N17]; 1xCarbamidomethyl [C29]	FALSE	1	2	1	A0A7R8Z362	A0A7R8Z362 [6527-6562]		0	4756.55	1.163	1.081	0.929	110.8	95.3	102.5	16.13	15.13	20.14		n/a	n/a	n/a	n/a	n/a	n/a	n/a	n/a	High	High	High	High	n/a	n/a	n/a	n/a	n/a	n/a	n/a	n/a	High	High	High	High	n/a	n/a
	FALSE	High	[R].VIAVNEVGPSDPSKPSNPIVIEEQPNKPCMDLGGVR.[D]	1xTMTpro [N-Term]; 2xTMTpro [K14; K27]; 2xDeamidated [N17; Q24]; 1xCarbamidomethyl [C29]	FALSE	1	2	1	A0A7R8Z362	A0A7R8Z362 [6527-6562]		0	4757.53										No Quan Values	High	High	High	High	n/a	n/a	n/a	n/a	n/a	n/a	n/a	n/a	High	High	High	High	n/a	n/a	n/a	n/a	n/a	n/a	n/a	n/a	High	High
	FALSE	High	[R].IFAVNAAGR.[S]	1xTMTpro [N-Term]	FALSE	1	2	3	A0A7R8Z362	A0A7R8Z362 [7220-7228]		0	1222.72	0.672	0.589	0.876	53.2	79.2	90.4	17.35	23.32	41.96		n/a	n/a	n/a	n/a	High	High	High	High	High	High	High	High	n/a	n/a	n/a	n/a	High	High	High	High	High	High	High	High	n/a	n/a
	FALSE	High	[K].LIDFGLATK.[L]	1xTMTpro [N-Term]; 1xTMTpro [K9]	FALSE	1	2	10	A0A7R8Z362	A0A7R8Z362 [8120-8128]		0	1585.98	0.775	0.838	1.082	83.2	107.3	99.2	39.35	14.62	18.11		High	High	High	High	High	High	High	High	High	High	High	High	High	High	High	High	High	High	High	High	High	High	High	High	High	High
	FALSE	High	[K].FNVPSPPGTPTVVK.[V]	1xTMTpro [N-Term]; 1xTMTpro [K14]	FALSE	1	2	11	A0A7R8Z362	A0A7R8Z362 [7143-7156]		0	2048.2	1.457	1.172	0.805	117.7	80.8	100.4	32.6	30.13	10.98		High	High	High	High	High	High	High	High	High	High	High	High	High	High	High	High	High	High	High	High	High	High	High	High	High	High
	FALSE	High	[K].NAAGFSKPSPPSLK.[F]	1xTMTpro [N-Term]; 2xTMTpro [K7; K14]	FALSE	1	2	5	A0A7R8Z362	A0A7R8Z362 [7123-7136]		0	2313.37	0.698	0.722	1.033	72.5	103.8	100.5	51.35	28.59	9.32		High	High	High	High	High	High	High	High	High	High	High	High	High	High	High	High	High	High	High	High	High	High	High	High	High	High
	FALSE	High	[R].AKAPFDPPGPPGVPK.[V]	1xTMTpro [N-Term]; 2xTMTpro [K2; K15]	FALSE	1	2	1	A0A7R8Z362	A0A7R8Z362 [7530-7544]		1	2387.43										No Quan Values	High	High	High	High	n/a	n/a	n/a	n/a	n/a	n/a	n/a	n/a	High	High	High	High	n/a	n/a	n/a	n/a	n/a	n/a	n/a	n/a	High	High
	FALSE	High	[R].LGWTIPVEASPRPTYK.[W]	1xTMTpro [N-Term]; 1xTMTpro [K16]	FALSE	1	2	1	A0A7R8Z362	A0A7R8Z362 [5582-5597]		0	2423.39	1.304	0.778	0.597	75	57.5	96.4	28.27	31.9	28.68		n/a	n/a	n/a	n/a	High	High	High	High	n/a	n/a	n/a	n/a	n/a	n/a	n/a	n/a	High	High	High	High	n/a	n/a	n/a	n/a	n/a	n/a
	FALSE	High	[R].FGGWEKALEVPASVTSAR.[V]	1xTMTpro [N-Term]; 1xTMTpro [K6]	FALSE	1	2	2	A0A7R8Z362	A0A7R8Z362 [5506-5523]		1	2513.4	0.77	1.625	2.11	151.5	196.7	93.2	34.15	22.77	22.47		High	High	High	High	n/a	n/a	n/a	n/a	n/a	n/a	n/a	n/a	High	High	High	High	n/a	n/a	n/a	n/a	n/a	n/a	n/a	n/a	High	High
	FALSE	High	[K].GKFNVPSPPGTPTVVK.[V]	1xTMTpro [N-Term]; 2xTMTpro [K2; K16]	FALSE	1	2	2	A0A7R8Z362	A0A7R8Z362 [7141-7156]		1	2537.53	1.375	1.212	0.882	117.5	85.5	96.9	35.21	23.93	7.08		High	High	High	High	High	High	High	High	n/a	n/a	n/a	n/a	High	High	High	High	High	High	High	High	n/a	n/a	n/a	n/a	High	High
	FALSE	High	[K].FLVVLDLDDVIETDAGLYK.[V]	1xTMTpro [N-Term]; 1xTMTpro [K19]	FALSE	1	2	2	A0A7R8Z362	A0A7R8Z362 [67-85]		0	2746.54	1.424	0.967	0.679	97.7	68.6	101	4.94	13.56	12.59		High	High	High	High	n/a	n/a	n/a	n/a	n/a	n/a	n/a	n/a	High	High	High	High	n/a	n/a	n/a	n/a	n/a	n/a	n/a	n/a	High	High
	FALSE	High	[K].YIEQPIKPAPPPIVTIK.[Q]	1xTMTpro [N-Term]; 2xTMTpro [K7; K17]	FALSE	1	2	5	A0A7R8Z362	A0A7R8Z362 [8541-8557]		0	2816.75	1.286	0.746	0.58	72.9	56.7	97.7	58.9	76.32	39.72		High	High	High	High	High	High	High	High	High	High	High	High	High	High	High	High	High	High	High	High	High	High	High	High	High	High
	FALSE	High	[K].IKWPAPISNGGSPIIGYDVER.[R]	1xTMTpro [N-Term]; 1xTMTpro [K2]	FALSE	1	2	3	A0A7R8Z362	A0A7R8Z362 [6074-6094]		1	2877.61	1.066	0.933	0.875	96.3	90.4	103.2	13.82	8.96	19.13		High	High	High	High	High	High	High	High	High	High	High	High	High	High	High	High	High	High	High	High	High	High	High	High	High	High
	FALSE	High	[R].EVGSSTWVR.[V]	1xTMTpro [N-Term]	FALSE	1	2	2	A0A7R8Z362	A0A7R8Z362 [7577-7585]		0	1324.72	0.943	1.007	1.068	100.4	106.4	99.7	15.17	25.19	14.96		n/a	n/a	n/a	n/a	High	High	High	High	High	High	High	High	n/a	n/a	n/a	n/a	High	High	High	High	High	High	High	High	n/a	n/a
	FALSE	High	[K].VTNVEEGHEYEFR.[V]	1xTMTpro [N-Term]	FALSE	1	2	2	A0A7R8Z362	A0A7R8Z362 [3754-3766]		0	1912.94	0.907	1.124	1.239	113.3	124.9	100.8	14.17	23.46	16.17		n/a	n/a	n/a	n/a	High	High	High	High	High	High	High	High	n/a	n/a	n/a	n/a	High	High	High	High	High	High	High	High	n/a	n/a
	FALSE	High	[K].SDIPEMTVDGLTPGHEYK.[F]	1xTMTpro [N-Term]; 1xTMTpro [K18]	FALSE	1	2	2	A0A7R8Z362	A0A7R8Z362 [4531-4548]		0	2597.34	0.827	0.801	0.968	84.1	101.7	105	14.01	31.12	21.55		n/a	n/a	n/a	n/a	High	High	High	High	High	High	High	High	n/a	n/a	n/a	n/a	High	High	High	High	High	High	High	High	n/a	n/a
	FALSE	High	[K].TLLEDLIVHAGK.[R]	1xTMTpro [N-Term]; 1xTMTpro [K12]	FALSE	1	2	2	A0A7R8Z362	A0A7R8Z362 [5569-5580]		0	1917.17	1.059	1.059	1	109.3	103.2	103.2	73.88	27.51	7.45		n/a	n/a	n/a	n/a	High	High	High	High	High	High	High	High	n/a	n/a	n/a	n/a	High	High	High	High	High	High	High	High	n/a	n/a
	FALSE	High	[R].AVNKAGPGVPSDPTQPHIAR.[A]	1xTMTpro [N-Term]; 1xTMTpro [K4]	FALSE	1	2	2	A0A7R8Z362	A0A7R8Z362 [5245-5264]		1	2620.48	0.798	0.743	0.931	64.4	80.7	86.7	18.93	26.09	29.38		n/a	n/a	n/a	n/a	High	High	High	High	High	High	High	High	n/a	n/a	n/a	n/a	High	High	High	High	High	High	High	High	n/a	n/a
	FALSE	High	[K].YGQDTAEIEINVISKPGKPEGPLEVSDIHK.[E]	1xTMTpro [N-Term]; 1xDeamidated [N11]; 3xTMTpro [K15; K18; K30]	FALSE	1	2	1	A0A7R8Z362	A0A7R8Z362 [4463-4492]		0	4481.49										No Quan Values	n/a	n/a	n/a	n/a	High	High	High	High	n/a	n/a	n/a	n/a	n/a	n/a	n/a	n/a	High	High	High	High	n/a	n/a	n/a	n/a	n/a	n/a
	FALSE	High	[K].LWLDGLIGR.[K]	1xTMTpro [N-Term]	FALSE	1	2	2	A0A7R8Z362	A0A7R8Z362 [6159-6167]		0	1346.81	0.889	0.725	0.815	69.9	78.6	96.5	28.69	37.93	53.16		n/a	n/a	n/a	n/a	High	High	High	High	High	High	High	High	n/a	n/a	n/a	n/a	High	High	High	High	High	High	High	High	n/a	n/a
	FALSE	High	[K].AGEVPGNQTDGVVDGLK.[E]	1xTMTpro [N-Term]; 1xTMTpro [K17]	FALSE	1	2	1	A0A7R8Z362	A0A7R8Z362 [2853-2869]		0	2264.24	1.138	1.018	0.895	100.3	88.1	98.5	17.75	23.53	15.12		n/a	n/a	n/a	n/a	n/a	n/a	n/a	n/a	High	High	High	High	n/a	n/a	n/a	n/a	n/a	n/a	n/a	n/a	High	High	High	High	n/a	n/a
	FALSE	High	[K].KPGEPEPVSESEEESVK.[E]	1xTMTpro [N-Term]; 2xTMTpro [K1; K17]; 1xPhospho [S9]	FALSE	1	2	1	A0A7R8Z362	A0A7R8Z362 [1013-1029]	A0A7R8Z362 1xPhospho [S1021]	0	2849.46	1.254	1.275	1.017	125	99.7	98	8.31	8.99	18.17		n/a	n/a	n/a	n/a	n/a	n/a	n/a	n/a	High	High	High	High	n/a	n/a	n/a	n/a	n/a	n/a	n/a	n/a	High	High	High	High	n/a	n/a
	FALSE	High	[K].VSGEPAPTTR.[W]	1xTMTpro [N-Term]	FALSE	1	2	3	A0A7R8Z362	A0A7R8Z362 [4997-5006]		0	1318.73	0.802	1.095	1.364	108.6	135.3	99.2	23.88	18.18	13.4		High	High	High	High	High	High	High	High	High	High	High	High	High	High	High	High	High	High	High	High	High	High	High	High	High	High
	FALSE	High	[R].ENDMSTWIR.[V]	1xTMTpro [N-Term]	FALSE	1	2	1	A0A7R8Z362	A0A7R8Z362 [7869-7877]		0	1455.72	1.065	1.102	1.034	112.3	105.4	101.9	12.21	19.23	7.08		High	High	High	High	n/a	n/a	n/a	n/a	n/a	n/a	n/a	n/a	High	High	High	High	n/a	n/a	n/a	n/a	n/a	n/a	n/a	n/a	High	High
	FALSE	High	[K].IEDMVNGDK.[K]	1xTMTpro [N-Term]; 1xDeamidated [N6]; 1xTMTpro [K9]	FALSE	1	2	1	A0A7R8Z362	A0A7R8Z362 [987-995]		0	1629.86	1.952	1.663	0.852	163.4	83.7	98.3	6.7	25.03	15.61		n/a	n/a	n/a	n/a	n/a	n/a	n/a	n/a	High	High	High	High	n/a	n/a	n/a	n/a	n/a	n/a	n/a	n/a	High	High	High	High	n/a	n/a
	FALSE	High	[K].AAEVPATECK.[G]	1xTMTpro [N-Term]; 1xCarbamidomethyl [C9]; 1xTMTpro [K10]	FALSE	1	2	3	A0A7R8Z362	A0A7R8Z362 [4332-4341]		0	1683.92	0.896	0.837	0.934	85.4	95.3	101.9	21.43	23.38	7.88		High	High	High	High	High	High	High	High	High	High	High	High	High	High	High	High	High	High	High	High	High	High	High	High	High	High
	FALSE	High	[K].RENDMSTWIR.[V]	1xTMTpro [N-Term]	FALSE	1	2	2	A0A7R8Z362	A0A7R8Z362 [7868-7877]		1	1611.82	1.103	1.095	0.993	106.9	97	97.6	8.36	5.07	12.69		High	High	High	High	High	High	High	High	n/a	n/a	n/a	n/a	High	High	High	High	High	High	High	High	n/a	n/a	n/a	n/a	High	High
	FALSE	High	[R].VFAQNEAGLSK.[E]	1xTMTpro [N-Term]; 1xDeamidated [Q4]; 1xTMTpro [K11]	FALSE	1	2	2	A0A7R8Z362	A0A7R8Z362 [7611-7621]		0	1773	1.303	1.269	0.973	129	98.9	101.6	26.49	20.33	9.92		n/a	n/a	n/a	n/a	High	High	High	High	High	High	High	High	n/a	n/a	n/a	n/a	High	High	High	High	High	High	High	High	n/a	n/a
	FALSE	High	[K].MDIGGDWVK.[V]	1xTMTpro [N-Term]; 1xTMTpro [K9]	FALSE	1	2	3	A0A7R8Z362	A0A7R8Z362 [6985-6993]		0	1628.9	0.794	0.966	1.217	87.6	110.4	90.7	35.31	18.69	31.7		High	High	High	High	High	High	High	High	High	High	High	High	High	High	High	High	High	High	High	High	High	High	High	High	High	High
	FALSE	High	[K].NSYIFEIVK.[C]	1xTMTpro [N-Term]; 1xTMTpro [K9]	FALSE	1	2	1	A0A7R8Z362	A0A7R8Z362 [8908-8916]		0	1721.01	0.899	1.063	1.182	95.2	105.9	89.6	29.27	10.21	21.29		n/a	n/a	n/a	n/a	n/a	n/a	n/a	n/a	High	High	High	High	n/a	n/a	n/a	n/a	n/a	n/a	n/a	n/a	High	High	High	High	n/a	n/a
	FALSE	High	[R].IIPNDSGTLITMK.[C]	1xTMTpro [N-Term]; 1xOxidation [M12]; 1xTMTpro [K13]	FALSE	1	2	4	A0A7R8Z362	A0A7R8Z362 [445-457]		0	2027.17	1.219	0.984	0.807	96.2	78.9	97.7	14.02	5.43	10.56		High	High	High	High	High	High	High	High	High	High	High	High	High	High	High	High	High	High	High	High	High	High	High	High	High	High
	FALSE	High	[R].IFQNLTDDSASLVMK.[N]	1xTMTpro [N-Term]; 2xDeamidated [Q3; N4]; 1xTMTpro [K15]	FALSE	1	2	1	A0A7R8Z362	A0A7R8Z362 [6602-6616]		0	2292.23										No Quan Values	n/a	n/a	n/a	n/a	n/a	n/a	n/a	n/a	High	High	High	High	n/a	n/a	n/a	n/a	n/a	n/a	n/a	n/a	High	High	High	High	n/a	n/a
	FALSE	High	[K].IYYSGDQPMDVTLTK.[D]	1xTMTpro [N-Term]; 1xDeamidated [Q7]; 1xOxidation [M9]; 1xTMTpro [K15]	FALSE	1	2	1	A0A7R8Z362	A0A7R8Z362 [7363-7377]		0	2356.22	1.124	1.092	0.971	109.1	97	99.9	21.7	9.71	6.79		n/a	n/a	n/a	n/a	High	High	High	High	n/a	n/a	n/a	n/a	n/a	n/a	n/a	n/a	High	High	High	High	n/a	n/a	n/a	n/a	n/a	n/a
	FALSE	High	[K].TEGPECELK.[V]	1xTMTpro [N-Term]; 1xCarbamidomethyl [C6]; 1xTMTpro [K9]	FALSE	1	2	3	A0A7R8Z362	A0A7R8Z362 [2556-2564]		0	1670.89	1.071	1.281	1.196	121.9	113.7	95.1	28.83	24.1	20.9		High	High	High	High	High	High	High	High	High	High	High	High	High	High	High	High	High	High	High	High	High	High	High	High	High	High
	FALSE	High	[R].YGGEPEPECK.[W]	1xTMTpro [N-Term]; 1xCarbamidomethyl [C9]; 1xTMTpro [K10]	FALSE	1	2	2	A0A7R8Z362	A0A7R8Z362 [2331-2340]		0	1773.9	1.008	1.075	1.066	112.2	111.3	104.4	11	34.58	31.08		n/a	n/a	n/a	n/a	High	High	High	High	High	High	High	High	n/a	n/a	n/a	n/a	High	High	High	High	High	High	High	High	n/a	n/a
	FALSE	High	[R].IISENNGK.[L]	1xTMTpro [N-Term]; 1xDeamidated [N6]; 1xTMTpro [K8]	FALSE	1	2	3	A0A7R8Z362	A0A7R8Z362 [550-557]		0	1483.86	2.041	0.947	0.464	90.2	44.2	95.2	41.44	16.71	20.22		High	High	High	High	High	High	High	High	High	High	High	High	High	High	High	High	High	High	High	High	High	High	High	High	High	High
	FALSE	High	[K].TEHTGTYK.[V]	1xTMTpro [N-Term]; 1xTMTpro [K8]	FALSE	1	2	3	A0A7R8Z362	A0A7R8Z362 [810-817]		0	1544.86	1.803	1.077	0.597	105.3	58.4	97.8	22.01	25.03	14.36		n/a	n/a	n/a	n/a	High	High	High	High	High	High	High	High	n/a	n/a	n/a	n/a	High	High	High	High	High	High	High	High	n/a	n/a
	FALSE	High	[K].LEEGQQYK.[F]	1xTMTpro [N-Term]; 1xTMTpro [K8]	FALSE	1	2	6	A0A7R8Z362	A0A7R8Z362 [3462-3469]		0	1602.9	0.812	1.016	1.25	102.3	125.9	100.7	33.1	24.38	24.99		High	High	High	High	High	High	High	High	High	High	High	High	High	High	High	High	High	High	High	High	High	High	High	High	High	High
	FALSE	High	[K].GIYTVTAK.[N]	1xTMTpro [N-Term]; 1xTMTpro [K8]	FALSE	1	2	4	A0A7R8Z362	A0A7R8Z362 [3863-3870]		0	1460.9	1.03	1.1	1.068	110.6	107.4	100.6	16.48	14.73	2.46		High	High	High	High	High	High	High	High	High	High	High	High	High	High	High	High	High	High	High	High	High	High	High	High	High	High
	FALSE	High	[K].FSPDWVEVAK.[T]	1xTMTpro [N-Term]; 1xTMTpro [K10]	FALSE	1	2	1	A0A7R8Z362	A0A7R8Z362 [2546-2555]		0	1786	0.862	1.054	1.224	107.2	124.5	101.7	15.77	21.25	21.79		High	High	High	High	n/a	n/a	n/a	n/a	n/a	n/a	n/a	n/a	High	High	High	High	n/a	n/a	n/a	n/a	n/a	n/a	n/a	n/a	High	High
	FALSE	High	[R].TNLNPISVK.[V]	1xTMTpro [N-Term]; 1xTMTpro [K9]	FALSE	1	2	1	A0A7R8Z362	A0A7R8Z362 [3504-3512]		0	1593.98	1.418	0.942	0.664	96.1	67.7	102	30.86	31.09	20.25		n/a	n/a	n/a	n/a	High	High	High	High	n/a	n/a	n/a	n/a	n/a	n/a	n/a	n/a	High	High	High	High	n/a	n/a	n/a	n/a	n/a	n/a
	FALSE	High	[R].ATGNIFAAK.[F]	1xTMTpro [N-Term]; 1xTMTpro [K9]	FALSE	1	2	1	A0A7R8Z362	A0A7R8Z362 [8002-8010]		0	1500.9	0.79	1.173	1.484	116.5	147.4	99.4	16.27	28.72	14.52		n/a	n/a	n/a	n/a	High	High	High	High	n/a	n/a	n/a	n/a	n/a	n/a	n/a	n/a	High	High	High	High	n/a	n/a	n/a	n/a	n/a	n/a
	FALSE	High	[R].QSEDGGNITFECR.[C]	1xTMTpro [N-Term]; 1xCarbamidomethyl [C12]	FALSE	1	2	1	A0A7R8Z362	A0A7R8Z362 [236-248]		0	1816.85	1.348	0.997	0.739	101.6	75.4	101.9	23.24	23.28	36.82		High	High	High	High	n/a	n/a	n/a	n/a	n/a	n/a	n/a	n/a	High	High	High	High	n/a	n/a	n/a	n/a	n/a	n/a	n/a	n/a	High	High
	FALSE	High	[R].IIPNDSGTLITMK.[C]	1xTMTpro [N-Term]; 1xDeamidated [N4]; 1xTMTpro [K13]	FALSE	1	2	2	A0A7R8Z362	A0A7R8Z362 [445-457]		0	2012.16	1.434	1.197	0.835	116.7	81.3	97.5	14.17	6.86	11.76		High	High	High	High	High	High	High	High	n/a	n/a	n/a	n/a	High	High	High	High	High	High	High	High	n/a	n/a	n/a	n/a	High	High
	FALSE	High	[K].EGEEYNFR.[V]	1xTMTpro [N-Term]	FALSE	1	2	1	A0A7R8Z362	A0A7R8Z362 [6519-6526]		0	1347.65	1.04	1.13	1.086	116.6	112.1	103.2	19.15	15.09	13.42		n/a	n/a	n/a	n/a	n/a	n/a	n/a	n/a	High	High	High	High	n/a	n/a	n/a	n/a	n/a	n/a	n/a	n/a	High	High	High	High	n/a	n/a
	FALSE	High	[K].YNHAVVPR.[L]	1xTMTpro [N-Term]	FALSE	1	2	3	A0A7R8Z362	A0A7R8Z362 [6011-6018]		0	1259.72	0.922	1.066	1.156	107.1	116.2	100.5	11.89	8.57	9.44		High	High	High	High	High	High	High	High	High	High	High	High	High	High	High	High	High	High	High	High	High	High	High	High	High	High
	FALSE	High	[K].QAVETPGK.[Q]	1xTMTpro [N-Term]; 1xTMTpro [K8]	FALSE	1	2	3	A0A7R8Z362	A0A7R8Z362 [1202-1209]		0	1437.86	1.124	0.884	0.786	89.9	79.9	101.7	39.6	58.44	29.01		High	High	High	High	High	High	High	High	High	High	High	High	High	High	High	High	High	High	High	High	High	High	High	High	High	High
	FALSE	High	[K].LLISDSVR.[K]	1xTMTpro [N-Term]	FALSE	1	2	3	A0A7R8Z362	A0A7R8Z362 [2963-2970]		0	1206.74	0.762	0.649	0.852	64	84	98.5	32.67	18.17	37.56		High	High	High	High	High	High	High	High	n/a	n/a	n/a	n/a	High	High	High	High	High	High	High	High	n/a	n/a	n/a	n/a	High	High
	FALSE	High	[K].INQPSTPLR.[D]	1xTMTpro [N-Term]	FALSE	1	2	1	A0A7R8Z362	A0A7R8Z362 [1485-1493]		0	1329.78	0.792	1.334	1.686	127.6	161.2	95.6	11.96	21.24	15.48		n/a	n/a	n/a	n/a	n/a	n/a	n/a	n/a	High	High	High	High	n/a	n/a	n/a	n/a	n/a	n/a	n/a	n/a	High	High	High	High	n/a	n/a
	FALSE	High	[K].MSLELDQK.[L]	1xTMTpro [N-Term]; 1xTMTpro [K8]	FALSE	1	2	3	A0A7R8Z362	A0A7R8Z362 [274-281]		0	1571.9	1.334	0.838	0.628	82.8	62	98.7	24.18	10.49	10.82		High	High	High	High	High	High	High	High	n/a	n/a	n/a	n/a	High	High	High	High	High	High	High	High	n/a	n/a	n/a	n/a	High	High
	FALSE	High	[K].DLSTSDSR.[V]	1xTMTpro [N-Term]	FALSE	1	2	3	A0A7R8Z362	A0A7R8Z362 [2347-2354]		0	1184.61	0.945	1.27	1.344	130.2	137.8	102.5	13.57	22.81	19.44		High	High	High	High	High	High	High	High	High	High	High	High	High	High	High	High	High	High	High	High	High	High	High	High	High	High
	FALSE	High	[K].TQPIGDNK.[F]	1xTMTpro [N-Term]; 1xTMTpro [K8]	FALSE	1	2	3	A0A7R8Z362	A0A7R8Z362 [59-66]		0	1480.86	1.392	1.149	0.825	108.5	78	94.5	12.98	22.88	14.25		High	High	High	High	n/a	n/a	n/a	n/a	High	High	High	High	High	High	High	High	n/a	n/a	n/a	n/a	High	High	High	High	High	High
	FALSE	High	[R].AENHYGSR.[E]	1xTMTpro [N-Term]	FALSE	1	2	3	A0A7R8Z362	A0A7R8Z362 [8378-8385]		0	1237.62	0.77	0.906	1.177	87.5	113.7	96.6	52.26	18.33	24.79		High	High	High	High	High	High	High	High	High	High	High	High	High	High	High	High	High	High	High	High	High	High	High	High	High	High
	FALSE	High	[K].EGNQYEFR.[I]	1xTMTpro [N-Term]	FALSE	1	2	3	A0A7R8Z362	A0A7R8Z362 [2272-2279]		0	1346.67	0.814	1.193	1.465	118.2	145.1	99	13.02	25.21	13.58		High	High	High	High	High	High	High	High	High	High	High	High	High	High	High	High	High	High	High	High	High	High	High	High	High	High
	FALSE	High	[K].SFELISTLK.[K]	1xTMTpro [N-Term]; 1xTMTpro [K9]	FALSE	1	2	2	A0A7R8Z362	A0A7R8Z362 [761-769]		0	1646	1.836	0.916	0.499	96	52.3	104.9	31.89	34.98	19.21		n/a	n/a	n/a	n/a	High	High	High	High	High	High	High	High	n/a	n/a	n/a	n/a	High	High	High	High	High	High	High	High	n/a	n/a
	FALSE	High	[K].QPEQGVLK.[N]	1xTMTpro [N-Term]; 1xTMTpro [K8]	FALSE	1	2	2	A0A7R8Z362	A0A7R8Z362 [1210-1217]		0	1506.91	1.283	1.241	0.967	124.2	96.9	100.1	32.24	34.7	20.47		n/a	n/a	n/a	n/a	High	High	High	High	High	High	High	High	n/a	n/a	n/a	n/a	High	High	High	High	High	High	High	High	n/a	n/a
	FALSE	High	[K].VTDAGQYR.[C]	1xTMTpro [N-Term]	FALSE	1	2	1	A0A7R8Z362	A0A7R8Z362 [1891-1898]		0	1213.65	0.921	1.269	1.378	126.3	137.2	99.6	6.97	14.81	17.74		n/a	n/a	n/a	n/a	n/a	n/a	n/a	n/a	High	High	High	High	n/a	n/a	n/a	n/a	n/a	n/a	n/a	n/a	High	High	High	High	n/a	n/a
	FALSE	High	[R].QIDGFAPTFTK.[K]	1xGln->pyro-Glu [N-Term]; 1xTMTpro [K11]	FALSE	1	2	6	A0A7R8Z362	A0A7R8Z362 [113-123]		0	1511.81	1.401	1.111	0.793	112.6	80.4	101.3	21.7	18.78	9.76		High	High	High	High	High	High	High	High	High	High	High	High	High	High	High	High	High	High	High	High	High	High	High	High	High	High
	FALSE	High	[K].TIPSAGTK.[R]	1xTMTpro [N-Term]; 1xTMTpro [K8]	FALSE	1	2	2	A0A7R8Z362	A0A7R8Z362 [4424-4431]		0	1382.85	0.877	1.123	1.28	111.7	127.4	99.5	12.09	21.38	5.16		High	High	High	High	n/a	n/a	n/a	n/a	High	High	High	High	High	High	High	High	n/a	n/a	n/a	n/a	High	High	High	High	High	High
	FALSE	High	[K].LDPNEVVK.[I]	1xTMTpro [N-Term]; 1xTMTpro [K8]	FALSE	1	2	3	A0A7R8Z362	A0A7R8Z362 [8129-8136]		0	1521.91	1.043	1.219	1.169	123	118	100.9	42.67	18.01	8.41		High	High	High	High	High	High	High	High	High	High	High	High	High	High	High	High	High	High	High	High	High	High	High	High	High	High
	FALSE	High	[K].TSTDQEPK.[K]	1xTMTpro [N-Term]; 1xTMTpro [K8]	FALSE	1	1	2	A0A7R8Z362	A0A7R8Z362 [1272-1279]		0	1513.84	0.885	0.937	1.059	92.4	104.4	98.6	19.54	37.32	12.55		High	High	High	High	High	High	High	High	n/a	n/a	n/a	n/a	High	High	High	High	High	High	High	High	n/a	n/a	n/a	n/a	High	High
	FALSE	High	[R].GNSGTYK.[I]	1xTMTpro [N-Term]; 1xTMTpro [K7]	FALSE	1	2	3	A0A7R8Z362	A0A7R8Z362 [3268-3274]		0	1334.76	0.743	0.862	1.161	87.9	118.3	102	41.31	30.64	30.74		High	High	High	High	High	High	High	High	High	High	High	High	High	High	High	High	High	High	High	High	High	High	High	High	High	High
	FALSE	High	[K].NPFDPPAPPGLPELEDWNEHMVK.[L]	1xTMTpro [N-Term]; 1xDeamidated [N18]; 1xOxidation [M21]; 1xTMTpro [K23]	FALSE	1	2	1	A0A7R8Z362	A0A7R8Z362 [3393-3415]		0	3254.63										No Quan Values	n/a	n/a	n/a	n/a	High	High	High	High	n/a	n/a	n/a	n/a	n/a	n/a	n/a	n/a	High	High	High	High	n/a	n/a	n/a	n/a	n/a	n/a
	FALSE	High	[R].NFMINVK.[V]	1xTMTpro [N-Term]; 1xTMTpro [K7]	FALSE	1	2	3	A0A7R8Z362	A0A7R8Z362 [5275-5281]		0	1473.87	0.533	0.741	1.389	71.8	134.6	97	3.57	9.82	9.61		High	High	High	High	High	High	High	High	High	High	High	High	High	High	High	High	High	High	High	High	High	High	High	High	High	High
	FALSE	High	[K].GGNSDPSDPSEK.[V]	1xTMTpro [N-Term]; 1xDeamidated [N3]; 1xTMTpro [K12]	FALSE	1	2	2	A0A7R8Z362	A0A7R8Z362 [5543-5554]		0	1798.9	0.888	0.959	1.081	97.2	109.5	101.4	17.02	29.81	16.39		High	High	High	High	n/a	n/a	n/a	n/a	n/a	n/a	n/a	n/a	High	High	High	High	n/a	n/a	n/a	n/a	n/a	n/a	n/a	n/a	High	High
	FALSE	High	[K].GDPDWGELK.[E]	1xTMTpro [N-Term]; 1xTMTpro [K9]	FALSE	1	2	2	A0A7R8Z362	A0A7R8Z362 [1617-1625]		0	1624.88	0.796	1.278	1.607	123	154.6	96.2	28.39	48.07	18.42		n/a	n/a	n/a	n/a	High	High	High	High	High	High	High	High	n/a	n/a	n/a	n/a	High	High	High	High	High	High	High	High	n/a	n/a
	FALSE	High	[R].LTYSSAK.[T]	1xTMTpro [N-Term]; 1xTMTpro [K7]	FALSE	1	2	5	A0A7R8Z362	A0A7R8Z362 [803-809]		0	1377.82	1.719	0.872	0.507	85.9	50	98.6	31.65	24.62	18.66		High	High	High	High	High	High	High	High	High	High	High	High	High	High	High	High	High	High	High	High	High	High	High	High	High	High
	FALSE	High	[K].IKWPAPISNGGSPIIGYDVER.[R]	1xTMTpro [N-Term]; 1xTMTpro [K2]; 1xDeamidated [N9]	FALSE	1	2	2	A0A7R8Z362	A0A7R8Z362 [6074-6094]		1	2878.6	1.242	1.017	0.819	92.7	74.6	91.1	14.84	20.78	24.58		n/a	n/a	n/a	n/a	High	High	High	High	High	High	High	High	n/a	n/a	n/a	n/a	High	High	High	High	High	High	High	High	n/a	n/a
	FALSE	High	[R].VDNVPYNSK.[F]	1xTMTpro [N-Term]; 1xTMTpro [K9]	FALSE	1	2	1	A0A7R8Z362	A0A7R8Z362 [4433-4441]		0	1643.92	0.891	0.744	0.835	69.5	78	93.4	10.81	14.05	34.5		n/a	n/a	n/a	n/a	n/a	n/a	n/a	n/a	High	High	High	High	n/a	n/a	n/a	n/a	n/a	n/a	n/a	n/a	High	High	High	High	n/a	n/a
	FALSE	High	[K].GENVVIK.[I]	1xTMTpro [N-Term]; 1xTMTpro [K7]	FALSE	1	2	3	A0A7R8Z362	A0A7R8Z362 [7750-7756]		0	1366.85	0.889	1.362	1.531	135	151.9	99.2	11.68	11.6	22.34		High	High	High	High	High	High	High	High	High	High	High	High	High	High	High	High	High	High	High	High	High	High	High	High	High	High
	FALSE	High	[R].EITNGAR.[Y]	1xTMTpro [N-Term]; 1xDeamidated [N4]	FALSE	1	2	2	A0A7R8Z362	A0A7R8Z362 [7679-7685]		0	1065.59	0.859	1.056	1.229	100.8	117.3	95.5	22.62	18.91	22.1		High	High	High	High	n/a	n/a	n/a	n/a	High	High	High	High	High	High	High	High	n/a	n/a	n/a	n/a	High	High	High	High	High	High
	FALSE	High	[RK].TNILEVK.[IT]	1xTMTpro [N-Term]; 1xTMTpro [K7]	FALSE	1	3	12	A0A7R8Z362	A0A7R8Z362 [4978-4984]		0	1424.9	0.699	0.825	1.18	82.8	118.4	100.4	9.99	17.22	13.85		High	High	High	High	High	High	High	High	High	High	High	High	High	High	High	High	High	High	High	High	High	High	High	High	High	High
	FALSE	High	[K].TTFILQK.[V]	1xTMTpro [N-Term]; 1xTMTpro [K7]	FALSE	1	2	3	A0A7R8Z362	A0A7R8Z362 [3850-3856]		0	1458.92	0.675	0.749	1.11	72.8	108	97.3	37.75	14.12	13.35		High	High	High	High	High	High	High	High	High	High	High	High	High	High	High	High	High	High	High	High	High	High	High	High	High	High
	FALSE	High	[R].SDGGQYR.[L]	1xTMTpro [N-Term]	FALSE	1	2	1	A0A7R8Z362	A0A7R8Z362 [6621-6627]		0	1086.55	0.97	0.89	0.918	92.5	95.3	103.9	23.31	12.98	24.42		n/a	n/a	n/a	n/a	High	High	High	High	n/a	n/a	n/a	n/a	n/a	n/a	n/a	n/a	High	High	High	High	n/a	n/a	n/a	n/a	n/a	n/a
	FALSE	High	[R].NVSEEAK.[D]	1xTMTpro [N-Term]; 1xTMTpro [K7]	FALSE	1	2	1	A0A7R8Z362	A0A7R8Z362 [8204-8210]		0	1384.79	0.758	0.993	1.309	99.5	131.2	100.2	15.6	23.06	13.36		n/a	n/a	n/a	n/a	n/a	n/a	n/a	n/a	High	High	High	High	n/a	n/a	n/a	n/a	n/a	n/a	n/a	n/a	High	High	High	High	n/a	n/a
	FALSE	High	[K].QSPIEAK.[L]	1xTMTpro [N-Term]; 1xTMTpro [K7]	FALSE	1	2	2	A0A7R8Z362	A0A7R8Z362 [2037-2043]		0	1380.83	0.868	0.897	1.033	89.9	103.6	100.3	30.71	8.86	5.58		High	High	High	High	n/a	n/a	n/a	n/a	High	High	High	High	High	High	High	High	n/a	n/a	n/a	n/a	High	High	High	High	High	High
	FALSE	High	[R].QICEGVK.[H]	1xTMTpro [N-Term]; 1xCarbamidomethyl [C3]; 1xTMTpro [K7]	FALSE	1	2	2	A0A7R8Z362	A0A7R8Z362 [8085-8091]		0	1441.83	0.673	1.026	1.525	103.7	154.1	101.1	39.29	28.41	31.74		High	High	High	High	High	High	High	High	n/a	n/a	n/a	n/a	High	High	High	High	High	High	High	High	n/a	n/a	n/a	n/a	High	High
	FALSE	High	[K].DLQGCLK.[L]	1xTMTpro [N-Term]; 1xCarbamidomethyl [C5]; 1xTMTpro [K7]	FALSE	1	2	2	A0A7R8Z362	A0A7R8Z362 [1786-1792]		0	1441.83	1.22	1.116	0.915	115.4	94.6	103.4	25.64	11.55	16.47		High	High	High	High	High	High	High	High	n/a	n/a	n/a	n/a	High	High	High	High	High	High	High	High	n/a	n/a	n/a	n/a	High	High
	FALSE	High	[K].MDTATGK.[W]	1xTMTpro [N-Term]; 1xTMTpro [K7]	FALSE	1	2	2	A0A7R8Z362	A0A7R8Z362 [2740-2746]		0	1331.75	0.679	0.997	1.468	96.7	142.3	97	26.64	25.45	22.42		n/a	n/a	n/a	n/a	High	High	High	High	High	High	High	High	n/a	n/a	n/a	n/a	High	High	High	High	High	High	High	High	n/a	n/a
	FALSE	High	[K].SQQLIEK.[D]	1xTMTpro [N-Term]; 1xTMTpro [K7]	FALSE	1	2	3	A0A7R8Z362	A0A7R8Z362 [1836-1842]		0	1453.89	1.151	1.194	1.037	119.6	103.9	100.2	26.91	16.41	14.85		High	High	High	High	High	High	High	High	High	High	High	High	High	High	High	High	High	High	High	High	High	High	High	High	High	High
	FALSE	High	[K].TEEVGIK.[K]	1xTMTpro [N-Term]; 1xTMTpro [K7]	FALSE	1	2	3	A0A7R8Z362	A0A7R8Z362 [997-1003]		0	1383.83	2.566	1.097	0.428	103.9	40.5	94.7	31.85	40.15	13.54		High	High	High	High	High	High	High	High	High	High	High	High	High	High	High	High	High	High	High	High	High	High	High	High	High	High
	FALSE	High	[K].LYIPAIK.[R]	1xTMTpro [N-Term]; 1xTMTpro [K7]	FALSE	1	2	3	A0A7R8Z362	A0A7R8Z362 [4147-4153]		0	1425.93	0.845	0.77	0.911	76.6	90.6	99.4	45.43	19.9	19.21		High	High	High	High	High	High	High	High	High	High	High	High	High	High	High	High	High	High	High	High	High	High	High	High	High	High
	FALSE	High	[R].GNSGTYK.[I]	1xTMTpro [N-Term]; 1xDeamidated [N2]; 1xTMTpro [K7]	FALSE	1	2	1	A0A7R8Z362	A0A7R8Z362 [3268-3274]		0	1335.74	0.727	0.839	1.154	85.7	117.9	102.2	30.76	28.21	27.78		n/a	n/a	n/a	n/a	n/a	n/a	n/a	n/a	High	High	High	High	n/a	n/a	n/a	n/a	n/a	n/a	n/a	n/a	High	High	High	High	n/a	n/a
	FALSE	High	[K].ATVTGLK.[E]	1xTMTpro [N-Term]; 1xTMTpro [K7]	FALSE	1	2	2	A0A7R8Z362	A0A7R8Z362 [3160-3166]		0	1297.83	0.975	0.908	0.932	95.3	97.8	104.9	13.94	24.89	12.46		n/a	n/a	n/a	n/a	High	High	High	High	High	High	High	High	n/a	n/a	n/a	n/a	High	High	High	High	High	High	High	High	n/a	n/a
	FALSE	High	[K].IENEDYK.[T]	1xTMTpro [N-Term]; 1xTMTpro [K7]	FALSE	1	2	3	A0A7R8Z362	A0A7R8Z362 [3843-3849]		0	1518.83	0.75	1.168	1.558	114.9	153.2	98.4	25.51	23.76	22.43		High	High	High	High	High	High	High	High	n/a	n/a	n/a	n/a	High	High	High	High	High	High	High	High	n/a	n/a	n/a	n/a	High	High
	FALSE	High	[K].IVNEDYR.[T]	1xTMTpro [N-Term]	FALSE	1	2	3	A0A7R8Z362	A0A7R8Z362 [5319-5325]		0	1212.65	0.578	0.627	1.086	58.7	101.7	93.7	68.96	34.06	38.79		High	High	High	High	High	High	High	High	High	High	High	High	High	High	High	High	High	High	High	High	High	High	High	High	High	High
	FALSE	High	[K].LVIMECK.[V]	1xTMTpro [N-Term]; 1xCarbamidomethyl [C6]; 1xTMTpro [K7]	FALSE	1	2	3	A0A7R8Z362	A0A7R8Z362 [558-564]		0	1500.88	1.777	0.898	0.505	80.3	45.2	89.4	52.73	12.61	24.48		High	High	High	High	High	High	High	High	High	High	High	High	High	High	High	High	High	High	High	High	High	High	High	High	High	High
FALSE	High	Master Protein	A0A7R8YU89	Myosin motor domain-containing protein OS=Hermetia illucens OX=343691 GN=HERILL_LOCUS8711 PE=3 SV=1	0	888.361	61	92	1252	92	1292	149.1	5.47	30543	92	0	0.883	1.15	1.303	0.985438	0.765351	0.851962	105	118.9	91.3	27.34	29.96	46.02	High	High	High	1
	Checked	Confidence	Annotated Sequence	Modifications	Contaminant	# Protein Groups	# Proteins	# PSMs	Master Protein Accessions	Positions in Master Proteins	Modifications in Master Proteins	# Missed Cleavages	Theo. MH+ [Da]	Abundance Ratio: (10 mM FAC) / (100 mM FAC)	Abundance Ratio: (10 mM FAC) / (CNTRL)	Abundance Ratio: (100 mM FAC) / (CNTRL)	Abundances (Grouped): 10 mM FAC	Abundances (Grouped): 100 mM FAC	Abundances (Grouped): CNTRL	Abundances (Grouped) CV [%]: 10 mM FAC	Abundances (Grouped) CV [%]: 100 mM FAC	Abundances (Grouped) CV [%]: CNTRL	Quan Info	Found in Sample: F1: 128C, Sample, 5, 10 mM FAC	Found in Sample: F1: 129N, Sample, 6, 10 mM FAC	Found in Sample: F1: 129C, Sample, 7, 10 mM FAC	Found in Sample: F1: 130N, Sample, 8, 10 mM FAC	Found in Sample: F2: 128C, Sample, 5, 10 mM FAC	Found in Sample: F2: 129N, Sample, 6, 10 mM FAC	Found in Sample: F2: 129C, Sample, 7, 10 mM FAC	Found in Sample: F2: 130N, Sample, 8, 10 mM FAC	Found in Sample: F3: 128C, Sample, 5, 10 mM FAC	Found in Sample: F3: 129N, Sample, 6, 10 mM FAC	Found in Sample: F3: 129C, Sample, 7, 10 mM FAC	Found in Sample: F3: 130N, Sample, 8, 10 mM FAC	Found in Sample: F1: 130C, Sample, 9, 100 mM FAC	Found in Sample: F1: 131N, Sample, 10, 100 mM FAC	Found in Sample: F1: 131C, Sample, 11, 100 mM FAC	Found in Sample: F1: 132N, Sample, 12, 100 mM FAC	Found in Sample: F2: 130C, Sample, 9, 100 mM FAC	Found in Sample: F2: 131N, Sample, 10, 100 mM FAC	Found in Sample: F2: 131C, Sample, 11, 100 mM FAC	Found in Sample: F2: 132N, Sample, 12, 100 mM FAC	Found in Sample: F3: 130C, Sample, 9, 100 mM FAC	Found in Sample: F3: 131N, Sample, 10, 100 mM FAC	Found in Sample: F3: 131C, Sample, 11, 100 mM FAC	Found in Sample: F3: 132N, Sample, 12, 100 mM FAC	Found in Sample: F1: 126, Control, 1, CNTRL	Found in Sample: F1: 127N, Control, 2, CNTRL
	FALSE	High	[R].AQLELSQVR.[Q]	1xTMTpro [N-Term]	FALSE	1	2	9	A0A7R8YU89	A0A7R8YU89 [892-900]		0	1347.79	0.73	0.814	1.114	69.5	95.2	85.4	14.64	31.13	63.12		High	High	High	High	High	High	High	High	High	High	High	High	High	High	High	High	High	High	High	High	High	High	High	High	High	High
	FALSE	High	[R].AQLELSQVR.[Q]	1xTMTpro [N-Term]; 1xDeamidated [Q7]	FALSE	1	2	4	A0A7R8YU89	A0A7R8YU89 [892-900]		0	1348.78	5.403	2.774	0.513	172.9	32	62.3	103.96	15.84	100.28		High	High	High	High	High	High	High	High	High	High	High	High	High	High	High	High	High	High	High	High	High	High	High	High	High	High
	FALSE	High	[K].DLLDQIGEGGR.[N]	1xTMTpro [N-Term]	FALSE	1	2	21	A0A7R8YU89	A0A7R8YU89 [842-852]		0	1476.8	0.955	1.249	1.308	123.6	129.4	99	25.15	43.77	34.86		High	High	High	High	High	High	High	High	High	High	High	High	High	High	High	High	High	High	High	High	High	High	High	High	High	High
	FALSE	High	[K].DLLDQIGEGGR.[N]	1xTMTpro [N-Term]; 1xDeamidated [Q5]	FALSE	1	2	6	A0A7R8YU89	A0A7R8YU89 [842-852]		0	1477.78	2.909	3.449	1.185	330	113.4	95.7	101.79	24.96	24.83		High	High	High	High	High	High	High	High	High	High	High	High	High	High	High	High	High	High	High	High	High	High	High	High	High	High
	FALSE	High	[R].NLEHDLDNLR.[E]	1xTMTpro [N-Term]	FALSE	1	2	20	A0A7R8YU89	A0A7R8YU89 [666-675]		0	1542.82	1.014	0.918	0.905	88.6	87.3	96.5	12.53	11.41	33.43		High	High	High	High	High	High	High	High	High	High	High	High	High	High	High	High	High	High	High	High	High	High	High	High	High	High
	FALSE	High	[R].NLEHDLDNLR.[E]	1xDeamidated [N1]; 1xTMTpro [N-Term]	FALSE	1	2	5	A0A7R8YU89	A0A7R8YU89 [666-675]		0	1543.8	0.78	1.355	1.737	128.5	164.7	94.8	5.25	32.14	19.84		High	High	High	High	High	High	High	High	High	High	High	High	High	High	High	High	High	High	High	High	High	High	High	High	High	High
	FALSE	High	[K].LTQEAVADLER.[N]	1xTMTpro [N-Term]	FALSE	1	2	29	A0A7R8YU89	A0A7R8YU89 [364-374]		0	1548.86	0.724	1.074	1.484	107.6	148.7	100.2	14.52	36.91	33.99		High	High	High	High	High	High	High	High	High	High	High	High	High	High	High	High	High	High	High	High	High	High	High	High	High	High
	FALSE	High	[K].LTQEAVADLER.[N]	1xTMTpro [N-Term]; 1xDeamidated [Q3]	FALSE	1	2	5	A0A7R8YU89	A0A7R8YU89 [364-374]		0	1549.84	3.861	4.129	1.07	286.4	74.2	69.3	76.18	30.33	81.11		High	High	High	High	n/a	n/a	n/a	n/a	High	High	High	High	High	High	High	High	n/a	n/a	n/a	n/a	High	High	High	High	High	High
	FALSE	High	[K].ELTFQSEEDR.[K]	1xTMTpro [N-Term]	FALSE	1	2	3	A0A7R8YU89	A0A7R8YU89 [1180-1189]		0	1557.77	0.958	0.845	0.883	66.5	69.4	78.6	25.94	18.56	60.21		n/a	n/a	n/a	n/a	High	High	High	High	High	High	High	High	n/a	n/a	n/a	n/a	High	High	High	High	High	High	High	High	n/a	n/a
	FALSE	High	[R].ANAIANAAEK.[K]	1xTMTpro [N-Term]; 1xTMTpro [K10]	FALSE	1	2	8	A0A7R8YU89	A0A7R8YU89 [766-775]		0	1580.93	0.83	1.132	1.364	110	132.5	97.2	22.52	24.93	25.64		High	High	High	High	High	High	High	High	High	High	High	High	High	High	High	High	High	High	High	High	High	High	High	High	High	High
	FALSE	High	[R].ANAIANAAEK.[K]	1xTMTpro [N-Term]; 1xDeamidated [N]; 1xTMTpro [K10]	FALSE	1	2	24	A0A7R8YU89	A0A7R8YU89 [766-775]		0	1581.91	0.976	1.212	1.242	120.6	123.6	99.5	18.5	27.1	24.77		High	High	High	High	High	High	High	High	High	High	High	High	High	High	High	High	High	High	High	High	High	High	High	High	High	High
	FALSE	High	[K].AQQELEEAEER.[A]	1xTMTpro [N-Term]	FALSE	1	2	1	A0A7R8YU89	A0A7R8YU89 [1230-1240]		0	1635.81	0.67	1.126	1.68	113.6	169.5	100.9	9.99	37.92	14.52		High	High	High	High	n/a	n/a	n/a	n/a	n/a	n/a	n/a	n/a	High	High	High	High	n/a	n/a	n/a	n/a	n/a	n/a	n/a	n/a	High	High
	FALSE	High	[R].ELENELDGEQR.[R]	1xTMTpro [N-Term]	FALSE	1	2	8	A0A7R8YU89	A0A7R8YU89 [1152-1162]		0	1635.81	0.781	1.328	1.7	130.4	166.9	98.2	30.36	30.62	15.2		High	High	High	High	High	High	High	High	High	High	High	High	High	High	High	High	High	High	High	High	High	High	High	High	High	High
	FALSE	High	[K].DIQTALEEEQR.[A]	1xTMTpro [N-Term]	FALSE	1	2	12	A0A7R8YU89	A0A7R8YU89 [983-993]		0	1635.85	0.755	1.351	1.789	126.8	168	93.9	26.04	41.24	42.41		High	High	High	High	High	High	High	High	High	High	High	High	High	High	High	High	High	High	High	High	High	High	High	High	High	High
	FALSE	High	[R].ADMAEQAISK.[F]	1xTMTpro [N-Term]; 1xTMTpro [K10]	FALSE	1	2	5	A0A7R8YU89	A0A7R8YU89 [1241-1250]		0	1671.92	2.396	0.918	0.383	71	29.6	77.3	35.73	52.56	70.04		High	High	High	High	High	High	High	High	High	High	High	High	High	High	High	High	High	High	High	High	High	High	High	High	High	High
	FALSE	High	[R].ADMAEQAISK.[F]	1xTMTpro [N-Term]; 1xDeamidated [Q6]; 1xTMTpro [K10]	FALSE	1	2	3	A0A7R8YU89	A0A7R8YU89 [1241-1250]		0	1672.91	3.154	2.939	0.932	195.5	62	66.5	65.5	22.79	70.69		High	High	High	High	High	High	High	High	High	High	High	High	High	High	High	High	High	High	High	High	High	High	High	High	High	High
	FALSE	High	[R].ADMAEQAISK.[F]	1xTMTpro [N-Term]; 1xOxidation [M3]; 1xTMTpro [K10]	FALSE	1	2	5	A0A7R8YU89	A0A7R8YU89 [1241-1250]		0	1687.92	1.207	0.846	0.701	76.8	63.6	90.8	9.04	10.85	35.62		High	High	High	High	High	High	High	High	High	High	High	High	High	High	High	High	High	High	High	High	High	High	High	High	High	High
	FALSE	High	[R].ANALQNELEESR.[T]	1xTMTpro [N-Term]	FALSE	1	2	8	A0A7R8YU89	A0A7R8YU89 [1009-1020]		0	1677.87	0.775	1.168	1.507	97.3	125.6	83.3	23.18	35.94	57.75		High	High	High	High	High	High	High	High	High	High	High	High	High	High	High	High	High	High	High	High	High	High	High	High	High	High
	FALSE	High	[R].ANALQNELEESR.[T]	1xTMTpro [N-Term]; 1xDeamidated [N]	FALSE	1	2	12	A0A7R8YU89	A0A7R8YU89 [1009-1020]		0	1678.86	0.803	1.393	1.735	126.1	157	90.5	21.85	35.45	42.34		High	High	High	High	High	High	High	High	High	High	High	High	High	High	High	High	High	High	High	High	High	High	High	High	High	High
	FALSE	High	[R].LDEAEANALK.[G]	1xTMTpro [N-Term]; 1xTMTpro [K10]	FALSE	1	2	6	A0A7R8YU89	A0A7R8YU89 [1128-1137]		0	1681.96	0.833	1.172	1.406	109.8	131.8	93.7	18.87	30.38	29.53		High	High	High	High	High	High	High	High	High	High	High	High	High	High	High	High	High	High	High	High	High	High	High	High	High	High
	FALSE	High	[R].LDEAEANALK.[G]	1xTMTpro [N-Term]; 1xDeamidated [N7]; 1xTMTpro [K10]	FALSE	1	2	23	A0A7R8YU89	A0A7R8YU89 [1128-1137]		0	1682.95	0.82	1.235	1.505	116.4	141.9	94.3	24.06	33.44	41.36		High	High	High	High	High	High	High	High	High	High	High	High	High	High	High	High	High	High	High	High	High	High	High	High	High	High
	FALSE	High	[K].QLQHTLNEVQGK.[L]	1xGln->pyro-Glu [N-Term]; 1xTMTpro [K12]	FALSE	1	2	3	A0A7R8YU89	A0A7R8YU89 [582-593]		0	1681.92	1.302	0.953	0.732	70.2	54	73.7	31.6	6.04	72.92		High	High	High	High	High	High	High	High	High	High	High	High	High	High	High	High	High	High	High	High	High	High	High	High	High	High
	FALSE	High	[K].QLQHTLNEVQGK.[L]	1xGln->pyro-Glu [N-Term]; 1xDeamidated [N7]; 1xTMTpro [K12]	FALSE	1	2	1	A0A7R8YU89	A0A7R8YU89 [582-593]		0	1682.9	1.706	0.834	0.489	71.8	42.1	86.1	38.58	31.69	55.57		n/a	n/a	n/a	n/a	n/a	n/a	n/a	n/a	High	High	High	High	n/a	n/a	n/a	n/a	n/a	n/a	n/a	n/a	High	High	High	High	n/a	n/a
	FALSE	High	[K].QLQHTLNEVQGK.[L]	1xTMTpro [N-Term]; 1xTMTpro [K12]	FALSE	1	2	6	A0A7R8YU89	A0A7R8YU89 [582-593]		0	2003.15	1.138	0.854	0.75	62.3	54.8	73	38.24	22.44	79.11		High	High	High	High	High	High	High	High	High	High	High	High	High	High	High	High	High	High	High	High	High	High	High	High	High	High
	FALSE	High	[K].QLQHTLNEVQGK.[L]	1xTMTpro [N-Term]; 1xDeamidated [N/Q]; 1xTMTpro [K12]	FALSE	1	2	5	A0A7R8YU89	A0A7R8YU89 [582-593]		0	2004.14	1.651	0.79	0.478	71	43	89.9	32.95	47.39	57.23		High	High	High	High	High	High	High	High	High	High	High	High	High	High	High	High	High	High	High	High	High	High	High	High	High	High
	FALSE	High	[R].SEELEEAKR.[K]	1xTMTpro [N-Term]; 1xTMTpro [K8]	FALSE	1	2	3	A0A7R8YU89	A0A7R8YU89 [714-722]		1	1698.95	0.802	1.29	1.608	121.7	151.7	94.3	37.51	51.74	51.41		n/a	n/a	n/a	n/a	High	High	High	High	High	High	High	High	n/a	n/a	n/a	n/a	High	High	High	High	High	High	High	High	n/a	n/a
	FALSE	High	[K].LEDEQSVVGK.[L]	1xTMTpro [N-Term]; 1xTMTpro [K10]	FALSE	1	2	7	A0A7R8YU89	A0A7R8YU89 [397-406]		0	1711.97	0.83	1.086	1.308	108.1	130.2	99.6	20.83	31.83	15.74		High	High	High	High	High	High	High	High	High	High	High	High	High	High	High	High	High	High	High	High	High	High	High	High	High	High
	FALSE	High	[R].EQVEEEGEGK.[A]	1xTMTpro [N-Term]; 1xTMTpro [K10]	FALSE	1	2	6	A0A7R8YU89	A0A7R8YU89 [676-685]		0	1741.91	0.713	1.653	2.317	157	220.1	95	48.25	46.35	45.23		High	High	High	High	High	High	High	High	High	High	High	High	High	High	High	High	High	High	High	High	High	High	High	High	High	High
	FALSE	High	[R].IEELEEEVEAER.[Q]	1xTMTpro [N-Term]	FALSE	1	2	9	A0A7R8YU89	A0A7R8YU89 [418-429]		0	1778.9	0.742	1.316	1.773	128.6	173.2	97.7	27.51	44.14	38.42		High	High	High	High	High	High	High	High	High	High	High	High	High	High	High	High	High	High	High	High	High	High	High	High	High	High
	FALSE	High	[K].TGEELQAAEDK.[I]	1xTMTpro [N-Term]; 1xTMTpro [K11]	FALSE	1	2	6	A0A7R8YU89	A0A7R8YU89 [309-319]		0	1798.97	0.688	1.448	2.104	134.8	195.9	93.1	54.98	44.23	53.79		High	High	High	High	High	High	High	High	High	High	High	High	High	High	High	High	High	High	High	High	High	High	High	High	High	High
	FALSE	High	[R].RANALQNELEESR.[T]	1xTMTpro [N-Term]	FALSE	1	2	2	A0A7R8YU89	A0A7R8YU89 [1008-1020]		1	1833.97	0.94	1.106	1.176	57.6	61.2	52	19.16	27.16	101.67		n/a	n/a	n/a	n/a	High	High	High	High	High	High	High	High	n/a	n/a	n/a	n/a	High	High	High	High	High	High	High	High	n/a	n/a
	FALSE	High	[R].RANALQNELEESR.[T]	1xTMTpro [N-Term]; 1xDeamidated [N]	FALSE	1	2	4	A0A7R8YU89	A0A7R8YU89 [1008-1020]		1	1834.96	0.749	1.167	1.559	99.1	132.4	84.9	20.03	34.97	37.45		High	High	High	High	High	High	High	High	High	High	High	High	High	High	High	High	High	High	High	High	High	High	High	High	High	High
	FALSE	High	[R].QLEEAESQVSQLSK.[I]	1xGln->pyro-Glu [N-Term]; 1xTMTpro [K14]	FALSE	1	2	9	A0A7R8YU89	A0A7R8YU89 [621-634]		0	1862.97	0.955	0.69	0.723	54	56.6	78.3	34.24	37.26	74.19		High	High	High	High	High	High	High	High	High	High	High	High	High	High	High	High	High	High	High	High	High	High	High	High	High	High
	FALSE	High	[R].QLEEAESQVSQLSK.[I]	1xGln->pyro-Glu [N-Term]; 1xDeamidated [Q]; 1xTMTpro [K14]	FALSE	1	2	3	A0A7R8YU89	A0A7R8YU89 [621-634]		0	1863.95	1.727	2.021	1.171	176.3	102.1	87.2	79.13	24.52	37.38		High	High	High	High	High	High	High	High	High	High	High	High	High	High	High	High	High	High	High	High	High	High	High	High	High	High
	FALSE	High	[R].QLEEAESQVSQLSK.[I]	1xGln->pyro-Glu [N-Term]; 2xDeamidated [Q8; Q11]; 1xTMTpro [K14]	FALSE	1	2	2	A0A7R8YU89	A0A7R8YU89 [621-634]		0	1864.93	1.479	2.069	1.399	206.4	139.6	99.8	66.12	18.51	19.36		n/a	n/a	n/a	n/a	High	High	High	High	High	High	High	High	n/a	n/a	n/a	n/a	High	High	High	High	High	High	High	High	n/a	n/a
	FALSE	High	[R].QLEEAESQVSQLSK.[I]	1xTMTpro [N-Term]; 1xTMTpro [K14]	FALSE	1	2	11	A0A7R8YU89	A0A7R8YU89 [621-634]		0	2184.2	0.911	0.688	0.756	58.6	64.3	85.1	24.41	30.63	59.69		High	High	High	High	High	High	High	High	High	High	High	High	High	High	High	High	High	High	High	High	High	High	High	High	High	High
	FALSE	High	[R].QLEEAESQVSQLSK.[I]	1xDeamidated [Q]; 1xTMTpro [N-Term]; 1xTMTpro [K14]	FALSE	1	2	10	A0A7R8YU89	A0A7R8YU89 [621-634]		0	2185.18	1.672	1.713	1.025	112.3	67.2	65.6	97.74	18.74	70.4		High	High	High	High	High	High	High	High	High	High	High	High	High	High	High	High	High	High	High	High	High	High	High	High	High	High
	FALSE	High	[R].QLEEAESQVSQLSK.[I]	2xDeamidated [Q1; Q]; 1xTMTpro [N-Term]; 1xTMTpro [K14]	FALSE	1	2	6	A0A7R8YU89	A0A7R8YU89 [621-634]		0	2186.17	2.016	3.069	1.522	232.2	115.1	75.6	150.33	49.12	58.94		High	High	High	High	High	High	High	High	High	High	High	High	High	High	High	High	High	High	High	High	High	High	High	High	High	High
	FALSE	High	[R].QLEEAESQVSQLSK.[I]	3xDeamidated [Q1; Q8; Q11]; 1xTMTpro [N-Term]; 1xTMTpro [K14]	FALSE	1	2	5	A0A7R8YU89	A0A7R8YU89 [621-634]		0	2187.15	1.064	1.639	1.541	156.7	147.3	95.6	110.23	25.23	16.96		High	High	High	High	High	High	High	High	High	High	High	High	High	High	High	High	High	High	High	High	High	High	High	High	High	High
	FALSE	High	[K].GAYEEGQEQLEAVR.[R]	1xTMTpro [N-Term]	FALSE	1	2	73	A0A7R8YU89	A0A7R8YU89 [817-830]		0	1882.95	0.748	1.457	1.948	143.2	191.4	98.3	23.82	35.53	19.03		High	High	High	High	High	High	High	High	High	High	High	High	High	High	High	High	High	High	High	High	High	High	High	High	High	High
	FALSE	High	[R].VRELENELDGEQR.[R]	1xTMTpro [N-Term]	FALSE	1	2	5	A0A7R8YU89	A0A7R8YU89 [1150-1162]		1	1890.98	0.87	0.893	1.026	81	93.1	90.8	31.82	47.65	39.48		High	High	High	High	n/a	n/a	n/a	n/a	High	High	High	High	High	High	High	High	n/a	n/a	n/a	n/a	High	High	High	High	High	High
	FALSE	High	[R].VRELENELDGEQR.[R]	1xTMTpro [N-Term]; 1xDeamidated [N6]	FALSE	1	2	6	A0A7R8YU89	A0A7R8YU89 [1150-1162]		1	1891.97	0.939	1.121	1.193	105.7	112.6	94.3	28.28	48.2	40.57		High	High	High	High	High	High	High	High	High	High	High	High	High	High	High	High	High	High	High	High	High	High	High	High	High	High
	FALSE	High	[R].AEQDHAQTQEK.[L]	1xTMTpro [N-Term]; 1xTMTpro [K11]	FALSE	1	2	13	A0A7R8YU89	A0A7R8YU89 [1102-1112]		0	1893	0.753	1.511	2.008	140.2	186.2	92.7	26.37	42.31	49.51		High	High	High	High	High	High	High	High	High	High	High	High	High	High	High	High	High	High	High	High	High	High	High	High	High	High
	FALSE	High	[R].QIEEAEEIAALNLAK.[F]	1xGln->pyro-Glu [N-Term]; 1xTMTpro [K15]	FALSE	1	2	5	A0A7R8YU89	A0A7R8YU89 [1212-1226]		0	1929.05	1.145	0.523	0.456	27.2	23.8	52.1	75.74	40.05	118.14		High	High	High	High	High	High	High	High	High	High	High	High	High	High	High	High	High	High	High	High	High	High	High	High	High	High
	FALSE	High	[R].QIEEAEEIAALNLAK.[F]	1xGln->pyro-Glu [N-Term]; 1xDeamidated [N12]; 1xTMTpro [K15]	FALSE	1	2	3	A0A7R8YU89	A0A7R8YU89 [1212-1226]		0	1930.03	1.455	1.125	0.773	93.8	64.5	83.4	41.61	11.13	58.8		High	High	High	High	High	High	High	High	n/a	n/a	n/a	n/a	High	High	High	High	High	High	High	High	n/a	n/a	n/a	n/a	High	High
	FALSE	High	[R].QIEEAEEIAALNLAK.[F]	1xTMTpro [N-Term]; 1xTMTpro [K15]	FALSE	1	2	11	A0A7R8YU89	A0A7R8YU89 [1212-1226]		0	2250.28	1.497	0.713	0.477	41.2	27.6	57.8	53.51	38.35	103.55		High	High	High	High	High	High	High	High	High	High	High	High	High	High	High	High	High	High	High	High	High	High	High	High	High	High
	FALSE	High	[R].QIEEAEEIAALNLAK.[F]	1xTMTpro [N-Term]; 1xDeamidated [N12]; 1xTMTpro [K15]	FALSE	1	2	3	A0A7R8YU89	A0A7R8YU89 [1212-1226]		0	2251.27	1.415	1.038	0.734	90.5	64	87.2	23.99	6.59	40.75		High	High	High	High	High	High	High	High	High	High	High	High	High	High	High	High	High	High	High	High	High	High	High	High	High	High
	FALSE	High	[K].LEQTLDELEDSLER.[E]	1xTMTpro [N-Term]	FALSE	1	2	17	A0A7R8YU89	A0A7R8YU89 [330-343]		0	1994.02	0.838	1.118	1.335	110.3	131.7	98.6	27.78	37.18	33.08		High	High	High	High	High	High	High	High	High	High	High	High	High	High	High	High	High	High	High	High	High	High	High	High	High	High
	FALSE	High	[K].GAYEEGQEQLEAVRR.[E]	1xTMTpro [N-Term]	FALSE	1	2	4	A0A7R8YU89	A0A7R8YU89 [817-831]		1	2039.05	1.087	1.075	0.989	90.5	83.2	84.2	44.17	80.18	66.65		High	High	High	High	High	High	High	High	High	High	High	High	High	High	High	High	High	High	High	High	High	High	High	High	High	High
	FALSE	High	[R].KAQQELEEAEER.[A]	1xTMTpro [N-Term]; 1xTMTpro [K1]	FALSE	1	2	8	A0A7R8YU89	A0A7R8YU89 [1229-1240]		1	2068.12	2.316	1.156	0.499	103.4	44.7	89.5	47	48.3	58.18		High	High	High	High	High	High	High	High	High	High	High	High	High	High	High	High	High	High	High	High	High	High	High	High	High	High
	FALSE	High	[R].KAQQELEEAEER.[A]	1xTMTpro [N-Term]; 1xTMTpro [K1]; 1xDeamidated [Q]	FALSE	1	2	2	A0A7R8YU89	A0A7R8YU89 [1229-1240]		1	2069.1	5.138	4.687	0.912	396.1	77.1	84.5	60.15	24.8	44.13		High	High	High	High	High	High	High	High	n/a	n/a	n/a	n/a	High	High	High	High	High	High	High	High	n/a	n/a	n/a	n/a	High	High
	FALSE	High	[R].IQEKEEEFENTR.[K]	1xTMTpro [N-Term]; 1xTMTpro [K4]	FALSE	1	2	2	A0A7R8YU89	A0A7R8YU89 [907-918]		1	2160.14	0.684	1.249	1.827	117.7	172.2	94.3	35.21	41.08	45.4		High	High	High	High	n/a	n/a	n/a	n/a	High	High	High	High	High	High	High	High	n/a	n/a	n/a	n/a	High	High	High	High	High	High
	FALSE	High	[R].DLEEANIQHESTLANLR.[K]	1xTMTpro [N-Term]	FALSE	1	2	8	A0A7R8YU89	A0A7R8YU89 [480-496]		0	2257.17	1.2	1.073	0.894	94.1	78.4	87.7	15.92	23.19	37.3		High	High	High	High	High	High	High	High	High	High	High	High	High	High	High	High	High	High	High	High	High	High	High	High	High	High
	FALSE	High	[R].LEEAGGATSAQIELNK.[K]	1xTMTpro [N-Term]; 1xTMTpro [K16]	FALSE	1	2	87	A0A7R8YU89	A0A7R8YU89 [453-468]		0	2239.24	1.019	1.07	1.05	104.8	102.8	97.9	14.81	20.29	16.25		High	High	High	High	High	High	High	High	High	High	High	High	High	High	High	High	High	High	High	High	High	High	High	High	High	High
	FALSE	High	[R].LEEAGGATSAQIELNK.[K]	1xTMTpro [N-Term]; 1xDeamidated [N/Q]; 1xTMTpro [K16]	FALSE	1	2	3	A0A7R8YU89	A0A7R8YU89 [453-468]		0	2240.23	1.082	0.9	0.832	89.1	82.4	99	16.87	32.04	21.91		High	High	High	High	n/a	n/a	n/a	n/a	n/a	n/a	n/a	n/a	High	High	High	High	n/a	n/a	n/a	n/a	n/a	n/a	n/a	n/a	High	High
	FALSE	High	[R].LEEAGGATSAQIELNK.[K]	1xTMTpro [N-Term]; 2xDeamidated [Q11; N15]; 1xTMTpro [K16]	FALSE	1	2	1	A0A7R8YU89	A0A7R8YU89 [453-468]		0	2241.21										No Quan Values	n/a	n/a	n/a	n/a	High	High	High	High	n/a	n/a	n/a	n/a	n/a	n/a	n/a	n/a	High	High	High	High	n/a	n/a	n/a	n/a	n/a	n/a
	FALSE	High	[R].NLNDEIAHQDELINK.[L]	1xTMTpro [N-Term]; 1xTMTpro [K15]	FALSE	1	2	14	A0A7R8YU89	A0A7R8YU89 [280-294]		0	2374.29	0.903	1.112	1.231	103	114	92.6	26.25	28.57	45.44		High	High	High	High	High	High	High	High	High	High	High	High	High	High	High	High	High	High	High	High	High	High	High	High	High	High
	FALSE	High	[R].NLNDEIAHQDELINK.[L]	1xTMTpro [N-Term]; 1xDeamidated [N]; 1xTMTpro [K15]	FALSE	1	2	20	A0A7R8YU89	A0A7R8YU89 [280-294]		0	2375.27	0.962	1.18	1.227	107.9	112.2	91.5	24.2	27.59	45.68		High	High	High	High	High	High	High	High	High	High	High	High	High	High	High	High	High	High	High	High	High	High	High	High	High	High
	FALSE	High	[R].NLNDEIAHQDELINK.[L]	1xTMTpro [N-Term]; 2xDeamidated [Q9; N14]; 1xTMTpro [K15]	FALSE	1	2	1	A0A7R8YU89	A0A7R8YU89 [280-294]		0	2376.25										No Quan Values	n/a	n/a	n/a	n/a	n/a	n/a	n/a	n/a	High	High	High	High	n/a	n/a	n/a	n/a	n/a	n/a	n/a	n/a	High	High	High	High	n/a	n/a
	FALSE	High	[K].HNDAVAEMAEQVDQLNK.[L]	1xTMTpro [N-Term]; 1xTMTpro [K17]	FALSE	1	2	15	A0A7R8YU89	A0A7R8YU89 [499-515]		0	2520.3	1.221	1.099	0.901	105.7	86.6	96.2	23.66	19.49	32.92		High	High	High	High	High	High	High	High	High	High	High	High	High	High	High	High	High	High	High	High	High	High	High	High	High	High
	FALSE	High	[K].HNDAVAEMAEQVDQLNK.[L]	1xTMTpro [N-Term]; 1xDeamidated [N/Q]; 1xTMTpro [K17]	FALSE	1	2	9	A0A7R8YU89	A0A7R8YU89 [499-515]		0	2521.28	1.177	1.278	1.086	125.7	106.8	98.3	21.18	19.94	23.75		High	High	High	High	High	High	High	High	High	High	High	High	High	High	High	High	High	High	High	High	High	High	High	High	High	High
	FALSE	High	[K].HNDAVAEMAEQVDQLNK.[L]	1xTMTpro [N-Term]; 2xDeamidated [N2; Q11]; 1xTMTpro [K17]	FALSE	1	2	1	A0A7R8YU89	A0A7R8YU89 [499-515]		0	2522.27										No Quan Values	n/a	n/a	n/a	n/a	n/a	n/a	n/a	n/a	High	High	High	High	n/a	n/a	n/a	n/a	n/a	n/a	n/a	n/a	High	High	High	High	n/a	n/a
	FALSE	High	[K].HNDAVAEMAEQVDQLNK.[L]	1xTMTpro [N-Term]; 1xOxidation [M8]; 1xTMTpro [K17]	FALSE	1	2	17	A0A7R8YU89	A0A7R8YU89 [499-515]		0	2536.3	1.301	1.082	0.831	102.4	78.7	94.7	27.63	26.08	39.44		High	High	High	High	High	High	High	High	High	High	High	High	High	High	High	High	High	High	High	High	High	High	High	High	High	High
	FALSE	High	[K].HNDAVAEMAEQVDQLNK.[L]	1xTMTpro [N-Term]; 1xOxidation [M8]; 1xDeamidated [Q11]; 1xTMTpro [K17]	FALSE	1	2	1	A0A7R8YU89	A0A7R8YU89 [499-515]		0	2537.28										No Quan Values	High	High	High	High	n/a	n/a	n/a	n/a	n/a	n/a	n/a	n/a	High	High	High	High	n/a	n/a	n/a	n/a	n/a	n/a	n/a	n/a	High	High
	FALSE	High	[R].NLEHDLDNLREQVEEEGEGK.[A]	1xTMTpro [N-Term]; 1xTMTpro [K20]	FALSE	1	2	10	A0A7R8YU89	A0A7R8YU89 [666-685]		1	2961.5	1.334	0.712	0.534	62	46.5	87	30.55	20.54	62.89		n/a	n/a	n/a	n/a	High	High	High	High	High	High	High	High	n/a	n/a	n/a	n/a	High	High	High	High	High	High	High	High	n/a	n/a
	FALSE	High	[R].NLEHDLDNLREQVEEEGEGK.[A]	1xTMTpro [N-Term]; 1xDeamidated [N/Q]; 1xTMTpro [K20]	FALSE	1	2	6	A0A7R8YU89	A0A7R8YU89 [666-685]		1	2962.49	1.262	1.098	0.87	98.5	78.1	89.7	14.8	16.21	47.62		High	High	High	High	n/a	n/a	n/a	n/a	High	High	High	High	High	High	High	High	n/a	n/a	n/a	n/a	High	High	High	High	High	High
	FALSE	High	[R].QAEQELADAHEQLNEISAQNASISAAK.[R]	1xGln->pyro-Glu [N-Term]; 1xDeamidated [N/Q]; 1xTMTpro [K27]	FALSE	1	2	9	A0A7R8YU89	A0A7R8YU89 [1032-1058]		0	3154.55	1	1.465	1.465	126.6	126.6	86.4	21.49	29.59	49.54		High	High	High	High	High	High	High	High	High	High	High	High	High	High	High	High	High	High	High	High	High	High	High	High	High	High
	FALSE	High	[R].QAEQELADAHEQLNEISAQNASISAAK.[R]	1xGln->pyro-Glu [N-Term]; 2xDeamidated [Q19; N20]; 1xTMTpro [K27]	FALSE	1	2	1	A0A7R8YU89	A0A7R8YU89 [1032-1058]		0	3155.53	0.978	1.138	1.163	120.9	123.6	106.3	11.32	18.31	18.08		n/a	n/a	n/a	n/a	n/a	n/a	n/a	n/a	High	High	High	High	n/a	n/a	n/a	n/a	n/a	n/a	n/a	n/a	High	High	High	High	n/a	n/a
	FALSE	High	[R].QAEQELADAHEQLNEISAQNASISAAK.[R]	1xTMTpro [N-Term]; 1xTMTpro [K27]	FALSE	1	2	3	A0A7R8YU89	A0A7R8YU89 [1032-1058]		0	3474.8	1.113	1.005	0.903	75.1	67.5	74.8	11.34	5.19	55.78		High	High	High	High	n/a	n/a	n/a	n/a	High	High	High	High	High	High	High	High	n/a	n/a	n/a	n/a	High	High	High	High	High	High
	FALSE	High	[R].QAEQELADAHEQLNEISAQNASISAAK.[R]	1xTMTpro [N-Term]; 1xDeamidated [N/Q]; 1xTMTpro [K27]	FALSE	1	2	10	A0A7R8YU89	A0A7R8YU89 [1032-1058]		0	3475.78	1.281	1.343	1.049	115.7	90.4	86.1	66.6	18.73	36.95		High	High	High	High	High	High	High	High	High	High	High	High	High	High	High	High	High	High	High	High	High	High	High	High	High	High
	FALSE	High	[R].QAEQELADAHEQLNEISAQNASISAAK.[R]	1xTMTpro [N-Term]; 2xDeamidated [N/Q]; 1xTMTpro [K27]	FALSE	1	2	5	A0A7R8YU89	A0A7R8YU89 [1032-1058]		0	3476.76	0.982	1.211	1.233	107.8	109.8	89.1	54.92	23.68	33.74		High	High	High	High	High	High	High	High	High	High	High	High	High	High	High	High	High	High	High	High	High	High	High	High	High	High
	FALSE	High	[K].LSIENSDLLR.[Q]	1xTMTpro [N-Term]	FALSE	1	2	3	A0A7R8YU89	A0A7R8YU89 [611-620]		0	1463.84	1.72	0.889	0.517	74.4	43.2	83.7	8.78	27.62	57.61		High	High	High	High	High	High	High	High	High	High	High	High	High	High	High	High	High	High	High	High	High	High	High	High	High	High
	FALSE	High	[K].LSIENSDLLR.[Q]	1xTMTpro [N-Term]; 1xDeamidated [N5]	FALSE	1	2	6	A0A7R8YU89	A0A7R8YU89 [611-620]		0	1464.82	1.475	0.9	0.61	81	54.9	90	6.93	12.01	47.1		High	High	High	High	High	High	High	High	High	High	High	High	High	High	High	High	High	High	High	High	High	High	High	High	High	High
	FALSE	High	[R].AGVLGQMEEFR.[D]	1xTMTpro [N-Term]	FALSE	1	2	6	A0A7R8YU89	A0A7R8YU89 [70-80]		0	1540.81	0.984	1.118	1.136	92.4	93.9	82.7	52.57	33.41	55.78		High	High	High	High	High	High	High	High	High	High	High	High	High	High	High	High	High	High	High	High	High	High	High	High	High	High
	FALSE	High	[R].TLNDFDASK.[K]	1xTMTpro [N-Term]; 1xTMTpro [K9]	FALSE	1	2	6	A0A7R8YU89	A0A7R8YU89 [600-608]		0	1618.89	1.757	0.827	0.471	70.8	40.3	85.6	15.77	56.65	63.3		High	High	High	High	High	High	High	High	High	High	High	High	High	High	High	High	High	High	High	High	High	High	High	High	High	High
	FALSE	High	[R].TLNDFDASK.[K]	1xTMTpro [N-Term]; 1xDeamidated [N3]; 1xTMTpro [K9]	FALSE	1	2	7	A0A7R8YU89	A0A7R8YU89 [600-608]		0	1619.88	1.499	0.89	0.593	77.6	51.8	87.2	8.89	38.68	56.54		High	High	High	High	High	High	High	High	High	High	High	High	High	High	High	High	High	High	High	High	High	High	High	High	High	High
	FALSE	High	[K].AQYFGELNDLR.[A]	1xTMTpro [N-Term]	FALSE	1	1	15	A0A7R8YU89	A0A7R8YU89 [553-563]		0	1629.86	1.135	0.724	0.637	60.6	53.4	83.8	17.46	25.01	60.87		High	High	High	High	High	High	High	High	High	High	High	High	High	High	High	High	High	High	High	High	High	High	High	High	High	High
	FALSE	High	[K].AQYFGELNDLR.[A]	1xTMTpro [N-Term]; 1xDeamidated [N8]	FALSE	1	1	7	A0A7R8YU89	A0A7R8YU89 [553-563]		0	1630.84	1.228	0.736	0.6	65.1	53	88.5	13.09	24.63	48.47		High	High	High	High	High	High	High	High	High	High	High	High	High	High	High	High	High	High	High	High	High	High	High	High	High	High
	FALSE	High	[K].GSLQEFQEK.[T]	1xTMTpro [N-Term]; 1xTMTpro [K9]	FALSE	1	2	12	A0A7R8YU89	A0A7R8YU89 [199-207]		0	1673.94	0.898	1.226	1.364	120.1	133.6	98	27.07	36.33	39.84		High	High	High	High	High	High	High	High	High	High	High	High	High	High	High	High	High	High	High	High	High	High	High	High	High	High
	FALSE	High	[R].AGVDHLSNEK.[A]	1xTMTpro [N-Term]; 1xTMTpro [K10]	FALSE	1	1	4	A0A7R8YU89	A0A7R8YU89 [564-573]		0	1677.94	1.899	1.38	0.726	124.9	65.8	90.5	58.04	28.88	52.4		High	High	High	High	High	High	High	High	High	High	High	High	High	High	High	High	High	High	High	High	High	High	High	High	High	High
	FALSE	High	[K].DIEDLELSVQK.[S]	1xTMTpro [N-Term]; 1xTMTpro [K11]	FALSE	1	2	15	A0A7R8YU89	A0A7R8YU89 [256-266]		0	1897.08	0.816	1.222	1.497	118.9	145.6	97.3	21.16	35.22	31.95		High	High	High	High	High	High	High	High	High	High	High	High	High	High	High	High	High	High	High	High	High	High	High	High	High	High
	FALSE	High	[R].LSVEVEDLQLEVDR.[A]	1xTMTpro [N-Term]	FALSE	1	2	22	A0A7R8YU89	A0A7R8YU89 [752-765]		0	1948.06	1.089	1.274	1.169	126.5	116.1	99.3	13.74	23.91	14.1		High	High	High	High	High	High	High	High	High	High	High	High	High	High	High	High	High	High	High	High	High	High	High	High	High	High
	FALSE	High	[K].VDDLAAELDASQK.[E]	1xTMTpro [N-Term]; 1xTMTpro [K13]	FALSE	1	2	10	A0A7R8YU89	A0A7R8YU89 [791-803]		0	1983.09	0.77	1.329	1.725	131.2	170.3	98.7	22.44	37.1	30.71		High	High	High	High	High	High	High	High	High	High	High	High	High	High	High	High	High	High	High	High	High	High	High	High	High	High
	FALSE	High	[K].VDDLAAELDASQK.[E]	1xTMTpro [N-Term]; 1xDeamidated [Q12]; 1xTMTpro [K13]	FALSE	1	2	4	A0A7R8YU89	A0A7R8YU89 [791-803]		0	1984.07	1.173	1.506	1.284	151.7	129.4	100.7	53.8	23.51	8.41		High	High	High	High	High	High	High	High	High	High	High	High	High	High	High	High	High	High	High	High	High	High	High	High	High	High
	FALSE	High	[R].ALDSMQASLEAEAK.[G]	1xTMTpro [N-Term]; 1xTMTpro [K14]	FALSE	1	2	6	A0A7R8YU89	A0A7R8YU89 [924-937]		0	2072.12	1.039	1.08	1.04	97.6	94	90.4	10.68	13.53	33.93		High	High	High	High	High	High	High	High	High	High	High	High	High	High	High	High	High	High	High	High	High	High	High	High	High	High
	FALSE	High	[R].ALDSMQASLEAEAK.[G]	1xTMTpro [N-Term]; 1xDeamidated [Q6]; 1xTMTpro [K14]	FALSE	1	2	1	A0A7R8YU89	A0A7R8YU89 [924-937]		0	2073.1										No Quan Values	High	High	High	High	n/a	n/a	n/a	n/a	n/a	n/a	n/a	n/a	High	High	High	High	n/a	n/a	n/a	n/a	n/a	n/a	n/a	n/a	High	High
	FALSE	High	[R].ALDSMQASLEAEAK.[G]	1xTMTpro [N-Term]; 1xOxidation [M5]; 1xTMTpro [K14]	FALSE	1	2	6	A0A7R8YU89	A0A7R8YU89 [924-937]		0	2088.11	1.141	1.069	0.937	92.1	80.7	86.1	21.26	20.52	54.41		High	High	High	High	High	High	High	High	High	High	High	High	High	High	High	High	High	High	High	High	High	High	High	High	High	High
	FALSE	High	[R].LAEAEETIESLNQK.[C]	1xTMTpro [N-Term]; 1xTMTpro [K14]	FALSE	1	2	21	A0A7R8YU89	A0A7R8YU89 [728-741]		0	2183.21	0.992	1.29	1.3	125.1	126.1	97	21.14	30.95	41.89		High	High	High	High	High	High	High	High	High	High	High	High	High	High	High	High	High	High	High	High	High	High	High	High	High	High
	FALSE	High	[R].LAEAEETIESLNQK.[C]	1xTMTpro [N-Term]; 1xDeamidated [N/Q]; 1xTMTpro [K14]	FALSE	1	2	22	A0A7R8YU89	A0A7R8YU89 [728-741]		0	2184.19	1.075	1.418	1.319	142.1	132.1	100.2	50.61	29.6	35.12		High	High	High	High	High	High	High	High	High	High	High	High	High	High	High	High	High	High	High	High	High	High	High	High	High	High
	FALSE	High	[R].LAEAEETIESLNQK.[C]	1xTMTpro [N-Term]; 2xDeamidated [N12; Q13]; 1xTMTpro [K14]	FALSE	1	2	1	A0A7R8YU89	A0A7R8YU89 [728-741]		0	2185.17										No Quan Values	n/a	n/a	n/a	n/a	High	High	High	High	n/a	n/a	n/a	n/a	n/a	n/a	n/a	n/a	High	High	High	High	n/a	n/a	n/a	n/a	n/a	n/a
	FALSE	High	[R].LKGAYEEGQEQLEAVR.[R]	1xTMTpro [N-Term]; 1xTMTpro [K2]	FALSE	1	2	14	A0A7R8YU89	A0A7R8YU89 [815-830]		1	2428.33	0.935	1.17	1.252	104.5	111.8	89.3	17.81	44.47	50		High	High	High	High	High	High	High	High	High	High	High	High	High	High	High	High	High	High	High	High	High	High	High	High	High	High
	FALSE	High	[K].AKLEQTLDELEDSLER.[E]	1xTMTpro [N-Term]; 1xTMTpro [K2]	FALSE	1	2	21	A0A7R8YU89	A0A7R8YU89 [328-343]		1	2497.36	0.843	1.337	1.585	133.8	158.7	100.1	28.34	44.22	46.32		High	High	High	High	High	High	High	High	High	High	High	High	High	High	High	High	High	High	High	High	High	High	High	High	High	High
	FALSE	High	[K].LEADINELEIALDHANK.[A]	1xTMTpro [N-Term]; 1xTMTpro [K17]	FALSE	1	2	15	A0A7R8YU89	A0A7R8YU89 [949-965]		0	2516.39	1.141	1.012	0.887	88.2	77.3	87.1	40.6	23.26	57.84		High	High	High	High	High	High	High	High	High	High	High	High	High	High	High	High	High	High	High	High	High	High	High	High	High	High
	FALSE	High	[K].LEQTLDELEDSLEREK.[K]	1xTMTpro [N-Term]; 1xTMTpro [K16]	FALSE	1	2	4	A0A7R8YU89	A0A7R8YU89 [330-345]		1	2555.37	1.479	0.868	0.587	68.1	46	78.5	28.74	51.4	73.86		High	High	High	High	High	High	High	High	High	High	High	High	High	High	High	High	High	High	High	High	High	High	High	High	High	High
	FALSE	High	[K].TGEELQAAEDKINHLNK.[V]	1xTMTpro [N-Term]; 2xTMTpro [K11; K17]	FALSE	1	2	5	A0A7R8YU89	A0A7R8YU89 [309-325]		1	2822.58	0.78	0.938	1.202	88.6	113.6	94.5	40.99	48.74	52.94		High	High	High	High	High	High	High	High	High	High	High	High	High	High	High	High	High	High	High	High	High	High	High	High	High	High
	FALSE	High	[K].TGEELQAAEDKINHLNK.[V]	1xTMTpro [N-Term]; 2xTMTpro [K11; K17]; 1xDeamidated [N13]	FALSE	1	2	1	A0A7R8YU89	A0A7R8YU89 [309-325]		1	2823.57	0.653	1.017	1.558	98.8	151.3	97.1	46.45	49.47	56.78		n/a	n/a	n/a	n/a	n/a	n/a	n/a	n/a	High	High	High	High	n/a	n/a	n/a	n/a	n/a	n/a	n/a	n/a	High	High	High	High	n/a	n/a
	FALSE	High	[K].DELQAALEEAEAALEQEENK.[V]	1xTMTpro [N-Term]; 1xTMTpro [K20]	FALSE	1	2	1	A0A7R8YU89	A0A7R8YU89 [869-888]		0	2838.45	0.732	1.396	1.909	136.9	187.1	98	25.09	38.18	9.65		n/a	n/a	n/a	n/a	n/a	n/a	n/a	n/a	High	High	High	High	n/a	n/a	n/a	n/a	n/a	n/a	n/a	n/a	High	High	High	High	n/a	n/a
	FALSE	High	[K].DELQAALEEAEAALEQEENK.[V]	1xTMTpro [N-Term]; 1xDeamidated [Q16]; 1xTMTpro [K20]	FALSE	1	2	1	A0A7R8YU89	A0A7R8YU89 [869-888]		0	2839.43										No Quan Values	High	High	High	High	n/a	n/a	n/a	n/a	n/a	n/a	n/a	n/a	High	High	High	High	n/a	n/a	n/a	n/a	n/a	n/a	n/a	n/a	High	High
	FALSE	High	[R].ELEELGERLEEAGGATSAQIELNK.[K]	1xTMTpro [N-Term]; 1xTMTpro [K24]	FALSE	1	2	4	A0A7R8YU89	A0A7R8YU89 [445-468]		1	3194.7	1.954	0.889	0.455	71.3	36.5	80.2	27.75	68.22	76.05		High	High	High	High	High	High	High	High	High	High	High	High	High	High	High	High	High	High	High	High	High	High	High	High	High	High
	FALSE	High	[R].ELEELGERLEEAGGATSAQIELNK.[K]	1xTMTpro [N-Term]; 1xDeamidated [Q19]; 1xTMTpro [K24]	FALSE	1	2	1	A0A7R8YU89	A0A7R8YU89 [445-468]		1	3195.69										No Quan Values	n/a	n/a	n/a	n/a	n/a	n/a	n/a	n/a	High	High	High	High	n/a	n/a	n/a	n/a	n/a	n/a	n/a	n/a	High	High	High	High	n/a	n/a
	FALSE	High	[R].LEAEKDELQAALEEAEAALEQEENK.[V]	1xTMTpro [N-Term]; 2xTMTpro [K5; K25]; 1xDeamidated [Q]	FALSE	1	2	6	A0A7R8YU89	A0A7R8YU89 [864-888]		1	3713.94										No Quan Values	High	High	High	High	High	High	High	High	High	High	High	High	High	High	High	High	High	High	High	High	High	High	High	High	High	High
	FALSE	High	[K].KMQGETNQK.[T]	1xTMTpro [N-Term]; 2xTMTpro [K1; K9]	FALSE	1	2	2	A0A7R8YU89	A0A7R8YU89 [300-308]		1	1976.14	0.737	1.487	2.018	142.6	193.4	95.9	29.61	49.17	53.21		n/a	n/a	n/a	n/a	High	High	High	High	High	High	High	High	n/a	n/a	n/a	n/a	High	High	High	High	High	High	High	High	n/a	n/a
	FALSE	High	[K].LQAQKNDLENQLR.[D]	1xTMTpro [N-Term]; 1xTMTpro [K5]; 1xDeamidated [N6]	FALSE	1	2	1	A0A7R8YU89	A0A7R8YU89 [211-223]		1	2179.23										No Quan Values	n/a	n/a	n/a	n/a	High	High	High	High	n/a	n/a	n/a	n/a	n/a	n/a	n/a	n/a	High	High	High	High	n/a	n/a	n/a	n/a	n/a	n/a
	FALSE	High	[K].ATSVIINYINLPDDQYR.[L]	1xTMTpro [N-Term]; 1xDeamidated [N7]	FALSE	1	2	2	A0A7R8YU89	A0A7R8YU89 [44-60]		0	2300.21	1.065	1.072	1.007	104.8	98.4	97.7	11.13	8.45	6.58		High	High	High	High	n/a	n/a	n/a	n/a	High	High	High	High	High	High	High	High	n/a	n/a	n/a	n/a	High	High	High	High	High	High
	FALSE	High	[K].ATSVIINYINLPDDQYR.[L]	1xTMTpro [N-Term]; 2xDeamidated [N7; N10]	FALSE	1	2	1	A0A7R8YU89	A0A7R8YU89 [44-60]		0	2301.19										No Quan Values	n/a	n/a	n/a	n/a	High	High	High	High	n/a	n/a	n/a	n/a	n/a	n/a	n/a	n/a	High	High	High	High	n/a	n/a	n/a	n/a	n/a	n/a
	FALSE	High	[K].KDIEDLELSVQK.[S]	1xTMTpro [N-Term]; 2xTMTpro [K1; K12]	FALSE	1	2	2	A0A7R8YU89	A0A7R8YU89 [255-266]		1	2329.38	0.65	1.406	2.164	144.6	222.7	102.9	31.51	46.49	41.62		High	High	High	High	High	High	High	High	n/a	n/a	n/a	n/a	High	High	High	High	High	High	High	High	n/a	n/a	n/a	n/a	High	High
	FALSE	High	[K].LKVDDLAAELDASQK.[E]	1xTMTpro [N-Term]; 2xTMTpro [K2; K15]	FALSE	1	2	6	A0A7R8YU89	A0A7R8YU89 [789-803]		1	2528.48	1.176	1.025	0.871	99.7	84.8	97.3	38.27	32.72	46.61		High	High	High	High	High	High	High	High	High	High	High	High	High	High	High	High	High	High	High	High	High	High	High	High	High	High
	FALSE	High	[K].LKVDDLAAELDASQK.[E]	1xTMTpro [N-Term]; 2xTMTpro [K2; K15]; 1xDeamidated [Q14]	FALSE	1	2	2	A0A7R8YU89	A0A7R8YU89 [789-803]		1	2529.46	1.675	1.668	0.995	148.9	88.9	89.3	94.92	15.79	23.14		High	High	High	High	n/a	n/a	n/a	n/a	High	High	High	High	High	High	High	High	n/a	n/a	n/a	n/a	High	High	High	High	High	High
	FALSE	High	[K].NLADEVKDLLDQIGEGGR.[N]	1xTMTpro [N-Term]; 1xTMTpro [K7]	FALSE	1	2	7	A0A7R8YU89	A0A7R8YU89 [835-852]		1	2550.4	0.746	0.932	1.25	91	122	97.6	42.01	45.52	54.18		High	High	High	High	High	High	High	High	High	High	High	High	High	High	High	High	High	High	High	High	High	High	High	High	High	High
	FALSE	High	[R].LEEAGGATSAQIELNKK.[R]	1xTMTpro [N-Term]; 2xTMTpro [K16; K17]	FALSE	1	2	6	A0A7R8YU89	A0A7R8YU89 [453-469]		1	2671.54	0.875	0.927	1.059	90.6	103.5	97.7	39.03	37.34	47.98		High	High	High	High	High	High	High	High	High	High	High	High	High	High	High	High	High	High	High	High	High	High	High	High	High	High
	FALSE	High	[K].KLEADINELEIALDHANK.[A]	1xTMTpro [N-Term]; 2xTMTpro [K1; K18]	FALSE	1	2	17	A0A7R8YU89	A0A7R8YU89 [948-965]		1	2948.69	1.321	1.162	0.88	99.7	75.5	85.8	36.41	23.38	63.84		High	High	High	High	High	High	High	High	High	High	High	High	High	High	High	High	High	High	High	High	High	High	High	High	High	High
	FALSE	High	[K].KLEADINELEIALDHANK.[A]	1xTMTpro [N-Term]; 2xTMTpro [K1; K18]; 1xDeamidated [N7]	FALSE	1	2	6	A0A7R8YU89	A0A7R8YU89 [948-965]		1	2949.67	1.001	1.284	1.283	123.4	123.3	96.1	23.58	23.49	41.6		High	High	High	High	High	High	High	High	High	High	High	High	High	High	High	High	High	High	High	High	High	High	High	High	High	High
	FALSE	High	[K].KHNDAVAEMAEQVDQLNK.[L]	1xTMTpro [N-Term]; 2xTMTpro [K1; K18]	FALSE	1	2	6	A0A7R8YU89	A0A7R8YU89 [498-515]		1	2952.6	1.31	1.159	0.884	112.6	85.9	97.2	24.29	24.72	37.59		High	High	High	High	High	High	High	High	High	High	High	High	High	High	High	High	High	High	High	High	High	High	High	High	High	High
	FALSE	High	[K].KHNDAVAEMAEQVDQLNK.[L]	1xTMTpro [N-Term]; 2xTMTpro [K1; K18]; 1xDeamidated [N3]	FALSE	1	2	3	A0A7R8YU89	A0A7R8YU89 [498-515]		1	2953.59	1.376	1.281	0.931	123.8	90	96.6	8.18	16.01	25.46		High	High	High	High	High	High	High	High	High	High	High	High	High	High	High	High	High	High	High	High	High	High	High	High	High	High
	FALSE	High	[R].NLNDEIAHQDELINKLNK.[E]	1xTMTpro [N-Term]; 2xTMTpro [K15; K18]	FALSE	1	2	1	A0A7R8YU89	A0A7R8YU89 [280-297]		1	3033.71	1.205	1.504	1.248	112.3	93.2	74.7	23.77	26.64	64.82		High	High	High	High	n/a	n/a	n/a	n/a	n/a	n/a	n/a	n/a	High	High	High	High	n/a	n/a	n/a	n/a	n/a	n/a	n/a	n/a	High	High
	FALSE	High	[R].NLNDEIAHQDELINKLNK.[E]	1xTMTpro [N-Term]; 1xDeamidated [N14]; 2xTMTpro [K15; K18]	FALSE	1	2	1	A0A7R8YU89	A0A7R8YU89 [280-297]		1	3034.7	0.96	1.209	1.259	115.2	120	95.3	18.68	27.87	32.56		n/a	n/a	n/a	n/a	High	High	High	High	n/a	n/a	n/a	n/a	n/a	n/a	n/a	n/a	High	High	High	High	n/a	n/a	n/a	n/a	n/a	n/a
	FALSE	High	[K].AKLEQTLDELEDSLEREK.[K]	1xTMTpro [N-Term]; 2xTMTpro [K2; K18]	FALSE	1	2	2	A0A7R8YU89	A0A7R8YU89 [328-345]		2	3058.71	1.675	0.779	0.465	59.9	35.8	77	39.65	86.6	84.81		n/a	n/a	n/a	n/a	High	High	High	High	High	High	High	High	n/a	n/a	n/a	n/a	High	High	High	High	High	High	High	High	n/a	n/a
	FALSE	High	[K].TALLESLSSEK.[G]	1xTMTpro [N-Term]; 1xTMTpro [K11]	FALSE	1	2	12	A0A7R8YU89	A0A7R8YU89 [188-198]		0	1786.05	1.029	0.94	0.914	78.2	76	83.1	21.51	20.64	50.45		High	High	High	High	High	High	High	High	High	High	High	High	High	High	High	High	High	High	High	High	High	High	High	High	High	High
	FALSE	High	[K].ISLTTQLEDTKR.[L]	1xTMTpro [N-Term]; 1xTMTpro [K11]	FALSE	1	2	2	A0A7R8YU89	A0A7R8YU89 [637-648]		1	2013.18	1.485	0.607	0.409	37.1	25	61.1	63.96	56.22	92.26		High	High	High	High	High	High	High	High	n/a	n/a	n/a	n/a	High	High	High	High	High	High	High	High	n/a	n/a	n/a	n/a	High	High
	FALSE	High	[K].ISLTTQLEDTK.[R]	1xTMTpro [N-Term]; 1xTMTpro [K11]	FALSE	1	2	3	A0A7R8YU89	A0A7R8YU89 [637-647]		0	1857.08	1.606	0.711	0.443	53.1	33.1	74.7	44.76	51.43	68.75		n/a	n/a	n/a	n/a	High	High	High	High	High	High	High	High	n/a	n/a	n/a	n/a	High	High	High	High	High	High	High	High	n/a	n/a
	FALSE	High	[R].KLESELQTLHSDLDELLNEAK.[N]	1xTMTpro [N-Term]; 2xTMTpro [K1; K21]	FALSE	1	2	1	A0A7R8YU89	A0A7R8YU89 [1060-1080]		1	3337.87	1.227	0.867	0.706	43.9	35.8	50.6	30.53	38.9	114.07		n/a	n/a	n/a	n/a	n/a	n/a	n/a	n/a	High	High	High	High	n/a	n/a	n/a	n/a	n/a	n/a	n/a	n/a	High	High	High	High	n/a	n/a
	FALSE	High	[R].LSQEEDAR.[N]	1xTMTpro [N-Term]	FALSE	1	2	8	A0A7R8YU89	A0A7R8YU89 [229-236]		0	1251.65	0.658	1.024	1.556	101.3	153.8	98.9	14.63	37.33	34.9		High	High	High	High	High	High	High	High	High	High	High	High	High	High	High	High	High	High	High	High	High	High	High	High	High	High
	FALSE	High	[K].ADQEISGLK.[K]	1xTMTpro [N-Term]; 1xTMTpro [K9]	FALSE	1	2	1	A0A7R8YU89	A0A7R8YU89 [246-254]		0	1568.91	0.908	1.468	1.617	145.8	160.6	99.3	28.29	29.26	20.74		High	High	High	High	n/a	n/a	n/a	n/a	n/a	n/a	n/a	n/a	High	High	High	High	n/a	n/a	n/a	n/a	n/a	n/a	n/a	n/a	High	High
	FALSE	High	[R].EQLGISER.[R]	1xTMTpro [N-Term]	FALSE	1	2	14	A0A7R8YU89	A0A7R8YU89 [1000-1007]		0	1235.69	0.604	1.148	1.9	113.2	187.4	98.6	32.92	44.91	42.77		High	High	High	High	High	High	High	High	High	High	High	High	High	High	High	High	High	High	High	High	High	High	High	High	High	High
	FALSE	High	[R].ELEELGER.[L]	1xTMTpro [N-Term]	FALSE	1	2	11	A0A7R8YU89	A0A7R8YU89 [445-452]		0	1278.69	0.677	1.2	1.771	118.3	174.6	98.6	24.25	42.79	39.3		High	High	High	High	High	High	High	High	High	High	High	High	High	High	High	High	High	High	High	High	High	High	High	High	High	High
	FALSE	High	[K].ELEQTIQR.[K]	1xTMTpro [N-Term]	FALSE	1	2	24	A0A7R8YU89	A0A7R8YU89 [378-385]		0	1320.74	0.744	1.154	1.551	113.3	152.3	98.2	22.32	40.1	39.85		High	High	High	High	High	High	High	High	High	High	High	High	High	High	High	High	High	High	High	High	High	High	High	High	High	High
	FALSE	High	[R].SEELEEAK.[R]	1xTMTpro [N-Term]; 1xTMTpro [K8]	FALSE	1	2	9	A0A7R8YU89	A0A7R8YU89 [714-721]		0	1542.85	0.609	1.221	2.006	123.7	203.2	101.3	39.81	43.68	48.23		High	High	High	High	High	High	High	High	High	High	High	High	High	High	High	High	High	High	High	High	High	High	High	High	High	High
	FALSE	High	[R].AGVLGQMEEFR.[D]	1xTMTpro [N-Term]; 1xOxidation [M7]	FALSE	1	2	1	A0A7R8YU89	A0A7R8YU89 [70-80]		0	1556.81	0.771	1.156	1.499	113.2	146.9	98	25.82	37.38	32.82		High	High	High	High	n/a	n/a	n/a	n/a	n/a	n/a	n/a	n/a	High	High	High	High	n/a	n/a	n/a	n/a	n/a	n/a	n/a	n/a	High	High
	FALSE	High	[K].MQGETNQK.[T]	1xTMTpro [N-Term]; 1xTMTpro [K8]	FALSE	1	2	6	A0A7R8YU89	A0A7R8YU89 [301-308]		0	1543.84	0.591	1.163	1.969	110.3	186.7	94.8	20.5	44.11	57.35		High	High	High	High	High	High	High	High	High	High	High	High	High	High	High	High	High	High	High	High	High	High	High	High	High	High
	FALSE	High	[K].MQGETNQK.[T]	1xTMTpro [N-Term]; 1xDeamidated [N/Q]; 1xTMTpro [K8]	FALSE	1	2	6	A0A7R8YU89	A0A7R8YU89 [301-308]		0	1544.82	0.736	1.155	1.569	114.4	155.5	99.1	16.49	43.17	41.26		High	High	High	High	High	High	High	High	High	High	High	High	High	High	High	High	High	High	High	High	High	High	High	High	High	High
	FALSE	High	[K].ELEALNAK.[L]	1xTMTpro [N-Term]; 1xDeamidated [N6]; 1xTMTpro [K8]	FALSE	1	2	5	A0A7R8YU89	A0A7R8YU89 [175-182]		0	1496.88	1.116	1.095	0.982	94.4	84.6	86.2	26.07	27.39	55.46		High	High	High	High	High	High	High	High	High	High	High	High	High	High	High	High	High	High	High	High	High	High	High	High	High	High
	FALSE	High	[R].TLLEQADR.[G]	1xTMTpro [N-Term]	FALSE	1	2	5	A0A7R8YU89	A0A7R8YU89 [1021-1028]		0	1249.71	0.479	0.874	1.824	79.5	165.8	90.9	22.98	45.06	61.17		High	High	High	High	High	High	High	High	High	High	High	High	High	High	High	High	High	High	High	High	High	High	High	High	High	High
	FALSE	High	[K].ELEQTIQR.[K]	1xTMTpro [N-Term]; 1xDeamidated [Q4]	FALSE	1	2	2	A0A7R8YU89	A0A7R8YU89 [378-385]		0	1321.73	5.569	6.865	1.233	415.3	74.6	60.5	82.27	32.5	91.56		n/a	n/a	n/a	n/a	High	High	High	High	High	High	High	High	n/a	n/a	n/a	n/a	High	High	High	High	High	High	High	High	n/a	n/a
	FALSE	High	[K].ELEALNAK.[L]	1xTMTpro [N-Term]; 1xTMTpro [K8]	FALSE	1	2	3	A0A7R8YU89	A0A7R8YU89 [175-182]		0	1495.9	1.307	1.089	0.834	67.8	51.9	62.2	39.92	33.03	94.74		High	High	High	High	High	High	High	High	High	High	High	High	High	High	High	High	High	High	High	High	High	High	High	High	High	High
	FALSE	High	[R].AGVDHLSNEK.[A]	1xTMTpro [N-Term]; 1xDeamidated [N8]; 1xTMTpro [K10]	FALSE	1	1	1	A0A7R8YU89	A0A7R8YU89 [564-573]		0	1678.93	1.089	1.292	1.186	132.4	121.6	102.5	63.19	20.5	15.37		n/a	n/a	n/a	n/a	n/a	n/a	n/a	n/a	High	High	High	High	n/a	n/a	n/a	n/a	n/a	n/a	n/a	n/a	High	High	High	High	n/a	n/a
	FALSE	High	[R].LALQVIQR.[N]	1xTMTpro [N-Term]	FALSE	1	2	3	A0A7R8YU89	A0A7R8YU89 [112-119]		0	1244.8	0.868	0.853	0.983	62.9	72.4	73.7	11.63	38.22	89.22		High	High	High	High	High	High	High	High	High	High	High	High	High	High	High	High	High	High	High	High	High	High	High	High	High	High
	FALSE	High	[K].MQGETNQK.[T]	1xOxidation [M1]; 1xTMTpro [N-Term]; 1xTMTpro [K8]	FALSE	1	2	7	A0A7R8YU89	A0A7R8YU89 [301-308]		0	1559.83	0.619	0.987	1.594	94.2	152.2	95.4	24.16	44.27	51.48		High	High	High	High	High	High	High	High	High	High	High	High	High	High	High	High	High	High	High	High	High	High	High	High	High	High
	FALSE	High	[R].KALEQQIK.[E]	1xTMTpro [N-Term]; 2xTMTpro [K1; K8]	FALSE	1	2	5	A0A7R8YU89	A0A7R8YU89 [1115-1122]		1	1870.19	0.718	1.308	1.821	121.1	168.5	92.6	34.54	46.21	59.32		High	High	High	High	High	High	High	High	High	High	High	High	High	High	High	High	High	High	High	High	High	High	High	High	High	High
	FALSE	High	[K].YESDGVAR.[S]	1xTMTpro [N-Term]	FALSE	1	2	2	A0A7R8YU89	A0A7R8YU89 [706-713]		0	1200.62	0.606	1.242	2.05	134.4	221.9	108.2	31.46	47.36	38.08		n/a	n/a	n/a	n/a	High	High	High	High	High	High	High	High	n/a	n/a	n/a	n/a	High	High	High	High	High	High	High	High	n/a	n/a
	FALSE	High	[K].NDLENQLR.[D]	1xTMTpro [N-Term]	FALSE	1	2	11	A0A7R8YU89	A0A7R8YU89 [216-223]		0	1305.71	0.678	1.073	1.583	103.2	152.3	96.2	42.56	41.09	50.32		High	High	High	High	High	High	High	High	High	High	High	High	High	High	High	High	High	High	High	High	High	High	High	High	High	High
	FALSE	High	[K].NDLENQLR.[D]	1xDeamidated [N1]; 1xTMTpro [N-Term]	FALSE	1	2	7	A0A7R8YU89	A0A7R8YU89 [216-223]		0	1306.69	0.738	1.255	1.701	122.5	166	97.6	28.46	42.84	50.22		High	High	High	High	High	High	High	High	High	High	High	High	High	High	High	High	High	High	High	High	High	High	High	High	High	High
	FALSE	High	[R].NYSTELFR.[L]	1xTMTpro [N-Term]	FALSE	1	2	3	A0A7R8YU89	A0A7R8YU89 [807-814]		0	1333.71	0.666	0.768	1.154	62.3	93.5	81.1	19.16	24.11	70.69		High	High	High	High	High	High	High	High	High	High	High	High	High	High	High	High	High	High	High	High	High	High	High	High	High	High
	FALSE	High	[K].KAEDAFAK.[E]	1xTMTpro [N-Term]; 2xTMTpro [K1; K8]	FALSE	1	2	2	A0A7R8YU89	A0A7R8YU89 [161-168]		1	1792.08	0.722	1.628	2.254	149.4	206.8	91.8	31.97	42.65	43.14		High	High	High	High	High	High	High	High	n/a	n/a	n/a	n/a	High	High	High	High	High	High	High	High	n/a	n/a	n/a	n/a	High	High
	FALSE	High	[R].NIHEIEK.[A]	1xTMTpro [N-Term]; 1xTMTpro [K7]	FALSE	1	2	12	A0A7R8YU89	A0A7R8YU89 [853-859]		0	1490.88	0.52	0.959	1.842	93.9	180.4	97.9	32.4	47.99	47.03		High	High	High	High	High	High	High	High	High	High	High	High	High	High	High	High	High	High	High	High	High	High	High	High	High	High
	FALSE	High	[R].NIHEIEK.[A]	1xDeamidated [N1]; 1xTMTpro [N-Term]; 1xTMTpro [K7]	FALSE	1	2	5	A0A7R8YU89	A0A7R8YU89 [853-859]		0	1491.87	0.83	1.293	1.558	134	161.6	103.7	23.79	42.78	34.55		High	High	High	High	High	High	High	High	High	High	High	High	High	High	High	High	High	High	High	High	High	High	High	High	High	High
	FALSE	High	[K].AMVDAAR.[L]	1xTMTpro [N-Term]	FALSE	1	2	6	A0A7R8YU89	A0A7R8YU89 [1089-1095]		0	1037.57	0.414	0.585	1.411	51.6	124.6	88.3	66.05	43.11	64.72		High	High	High	High	High	High	High	High	High	High	High	High	High	High	High	High	High	High	High	High	High	High	High	High	High	High
	FALSE	High	[K].ANAEAQK.[N]	1xTMTpro [N-Term]; 1xTMTpro [K7]	FALSE	1	2	13	A0A7R8YU89	A0A7R8YU89 [966-972]		0	1339.78	0.71	1.425	2.007	132.4	186.5	92.9	30.17	49.13	55.06		High	High	High	High	High	High	High	High	High	High	High	High	High	High	High	High	High	High	High	High	High	High	High	High	High	High
	FALSE	High	[K].NLADEVK.[D]	1xTMTpro [N-Term]; 1xTMTpro [K7]	FALSE	1	2	10	A0A7R8YU89	A0A7R8YU89 [835-841]		0	1396.83	0.613	1.103	1.797	110.9	180.8	100.6	32.65	41.79	37.38		High	High	High	High	High	High	High	High	High	High	High	High	High	High	High	High	High	High	High	High	High	High	High	High	High	High
	FALSE	High	[R].NQLFQQK.[K]	1xTMTpro [N-Term]; 2xDeamidated [Q5; Q6]; 1xTMTpro [K7]	FALSE	1	2	4	A0A7R8YU89	A0A7R8YU89 [237-243]		0	1515.87	2.231	2.511	1.126	234.6	105.2	93.4	65.97	25.4	29.42		High	High	High	High	High	High	High	High	High	High	High	High	High	High	High	High	High	High	High	High	High	High	High	High	High	High
	FALSE	High	[R].LADEEAR.[E]	1xTMTpro [N-Term]	FALSE	1	2	3	A0A7R8YU89	A0A7R8YU89 [649-655]		0	1107.6	1.261	0.992	0.787	77.4	61.4	78	13.86	84.31	74.61		High	High	High	High	High	High	High	High	High	High	High	High	High	High	High	High	High	High	High	High	High	High	High	High	High	High
	FALSE	High	[R].HADAQK.[N]	1xTMTpro [N-Term]; 1xTMTpro [K6]	FALSE	1	2	4	A0A7R8YU89	A0A7R8YU89 [1164-1169]		0	1277.75	0.933	0.965	1.034	88.7	95.1	92	28.8	41.35	52.05		High	High	High	High	n/a	n/a	n/a	n/a	High	High	High	High	High	High	High	High	n/a	n/a	n/a	n/a	High	High	High	High	High	High
	FALSE	High	[R].NQLFQQK.[K]	1xTMTpro [N-Term]; 1xTMTpro [K7]	FALSE	1	2	12	A0A7R8YU89	A0A7R8YU89 [237-243]		0	1513.9	0.588	0.666	1.133	50.5	86	75.9	62.47	42.19	83.72		High	High	High	High	High	High	High	High	High	High	High	High	High	High	High	High	High	High	High	High	High	High	High	High	High	High
	FALSE	High	[K].ANAEAQK.[N]	1xTMTpro [N-Term]; 1xDeamidated [N2]; 1xTMTpro [K7]	FALSE	1	2	13	A0A7R8YU89	A0A7R8YU89 [966-972]		0	1340.77	0.668	1.456	2.18	142.5	213.4	97.9	31.66	38.25	41.82		High	High	High	High	High	High	High	High	High	High	High	High	High	High	High	High	High	High	High	High	High	High	High	High	High	High
	FALSE	High	[K].ALEQQIK.[E]	1xTMTpro [N-Term]; 1xTMTpro [K7]	FALSE	1	2	6	A0A7R8YU89	A0A7R8YU89 [1116-1122]		0	1437.89	0.787	1.318	1.675	123.6	157.1	93.8	22.63	42.73	48.35		High	High	High	High	High	High	High	High	High	High	High	High	High	High	High	High	High	High	High	High	High	High	High	High	High	High
	FALSE	High	[R].NQLFQQK.[K]	1xTMTpro [N-Term]; 1xDeamidated [N/Q]; 1xTMTpro [K7]	FALSE	1	2	6	A0A7R8YU89	A0A7R8YU89 [237-243]		0	1514.88	1.474	1.726	1.171	126.5	85.8	73.3	83.91	20.95	65.02		High	High	High	High	High	High	High	High	High	High	High	High	High	High	High	High	High	High	High	High	High	High	High	High	High	High
	FALSE	High	[K].INHLNK.[V]	1xTMTpro [N-Term]; 1xDeamidated [N2]; 1xTMTpro [K6]	FALSE	1	2	2	A0A7R8YU89	A0A7R8YU89 [320-325]		0	1347.82	0.78	1.51	1.936	141.6	181.6	93.8	42.56	38.66	51.03		High	High	High	High	n/a	n/a	n/a	n/a	High	High	High	High	High	High	High	High	n/a	n/a	n/a	n/a	High	High	High	High	High	High
	FALSE	High	[K].NLADEVK.[D]	1xDeamidated [N1]; 1xTMTpro [N-Term]; 1xTMTpro [K7]	FALSE	1	2	2	A0A7R8YU89	A0A7R8YU89 [835-841]		0	1397.81	0.862	1.583	1.837	157.4	182.6	99.4	29.5	40.73	38.7		High	High	High	High	n/a	n/a	n/a	n/a	High	High	High	High	High	High	High	High	n/a	n/a	n/a	n/a	High	High	High	High	High	High
FALSE	High	Master Protein	A0A7R8US28	Nesprin-1 OS=Hermetia illucens OX=343691 GN=HERILL_LOCUS8783 PE=3 SV=1	0	872.135	10	168	446	168	20731	2354.7	5.15	9914	168	0	1.148	1.023	0.892	0.0300319	0.862485	0.0677795	103.3	90	100.9	7.68	1.82	5.53	High	High	High	1	Phospho [S448; S450]
	Checked	Confidence	Annotated Sequence	Modifications	Contaminant	# Protein Groups	# Proteins	# PSMs	Master Protein Accessions	Positions in Master Proteins	Modifications in Master Proteins	# Missed Cleavages	Theo. MH+ [Da]	Abundance Ratio: (10 mM FAC) / (100 mM FAC)	Abundance Ratio: (10 mM FAC) / (CNTRL)	Abundance Ratio: (100 mM FAC) / (CNTRL)	Abundances (Grouped): 10 mM FAC	Abundances (Grouped): 100 mM FAC	Abundances (Grouped): CNTRL	Abundances (Grouped) CV [%]: 10 mM FAC	Abundances (Grouped) CV [%]: 100 mM FAC	Abundances (Grouped) CV [%]: CNTRL	Quan Info	Found in Sample: F1: 128C, Sample, 5, 10 mM FAC	Found in Sample: F1: 129N, Sample, 6, 10 mM FAC	Found in Sample: F1: 129C, Sample, 7, 10 mM FAC	Found in Sample: F1: 130N, Sample, 8, 10 mM FAC	Found in Sample: F2: 128C, Sample, 5, 10 mM FAC	Found in Sample: F2: 129N, Sample, 6, 10 mM FAC	Found in Sample: F2: 129C, Sample, 7, 10 mM FAC	Found in Sample: F2: 130N, Sample, 8, 10 mM FAC	Found in Sample: F3: 128C, Sample, 5, 10 mM FAC	Found in Sample: F3: 129N, Sample, 6, 10 mM FAC	Found in Sample: F3: 129C, Sample, 7, 10 mM FAC	Found in Sample: F3: 130N, Sample, 8, 10 mM FAC	Found in Sample: F1: 130C, Sample, 9, 100 mM FAC	Found in Sample: F1: 131N, Sample, 10, 100 mM FAC	Found in Sample: F1: 131C, Sample, 11, 100 mM FAC	Found in Sample: F1: 132N, Sample, 12, 100 mM FAC	Found in Sample: F2: 130C, Sample, 9, 100 mM FAC	Found in Sample: F2: 131N, Sample, 10, 100 mM FAC	Found in Sample: F2: 131C, Sample, 11, 100 mM FAC	Found in Sample: F2: 132N, Sample, 12, 100 mM FAC	Found in Sample: F3: 130C, Sample, 9, 100 mM FAC	Found in Sample: F3: 131N, Sample, 10, 100 mM FAC	Found in Sample: F3: 131C, Sample, 11, 100 mM FAC	Found in Sample: F3: 132N, Sample, 12, 100 mM FAC	Found in Sample: F1: 126, Control, 1, CNTRL	Found in Sample: F1: 127N, Control, 2, CNTRL
	FALSE	High	[K].QNLTETLEK.[R]	1xTMTpro [N-Term]; 1xTMTpro [K9]	FALSE	1	2	4	A0A7R8US28	A0A7R8US28 [6605-6613]		0	1683.98	1.035	1.052	1.017	106.3	102.7	101	8.51	15.48	11.53		High	High	High	High	High	High	High	High	High	High	High	High	High	High	High	High	High	High	High	High	High	High	High	High	High	High
	FALSE	High	[K].QLADDSLDAWTR.[F]	1xGln->pyro-Glu [N-Term]	FALSE	1	2	2	A0A7R8US28	A0A7R8US28 [7711-7722]		0	1373.63										No Quan Labels	High	High	High	High	High	High	High	High	n/a	n/a	n/a	n/a	High	High	High	High	High	High	High	High	n/a	n/a	n/a	n/a	High	High
	FALSE	High	[K].QLADDSLDAWTR.[F]	1xTMTpro [N-Term]	FALSE	1	2	2	A0A7R8US28	A0A7R8US28 [7711-7722]		0	1694.87	1.022	1.021	0.999	103.2	101	101.1	7.27	17.9	10.69		High	High	High	High	High	High	High	High	n/a	n/a	n/a	n/a	High	High	High	High	High	High	High	High	n/a	n/a	n/a	n/a	High	High
	FALSE	High	[K].LANLDDLEAR.[N]	1xTMTpro [N-Term]	FALSE	1	2	1	A0A7R8US28	A0A7R8US28 [18591-18600]		0	1433.79	1.272	1.104	0.868	107.8	84.7	97.6	13.64	19.67	18.77		High	High	High	High	n/a	n/a	n/a	n/a	n/a	n/a	n/a	n/a	High	High	High	High	n/a	n/a	n/a	n/a	n/a	n/a	n/a	n/a	High	High
	FALSE	High	[K].VEEHIEEIR.[Q]	1xTMTpro [N-Term]	FALSE	1	2	3	A0A7R8US28	A0A7R8US28 [8502-8510]		0	1457.79	1.564	1.243	0.795	122.6	78.4	98.6	34.65	29.93	27.82		High	High	High	High	High	High	High	High	High	High	High	High	High	High	High	High	High	High	High	High	High	High	High	High	High	High
	FALSE	High	[K].IIEEEQQLR.[A]	1xTMTpro [N-Term]	FALSE	1	2	1	A0A7R8US28	A0A7R8US28 [7944-7952]		0	1461.82	3.636	0.91	0.25	94.3	25.9	103.7	49.01	84.52	15.56		High	High	High	High	n/a	n/a	n/a	n/a	n/a	n/a	n/a	n/a	High	High	High	High	n/a	n/a	n/a	n/a	n/a	n/a	n/a	n/a	High	High
	FALSE	High	[R].LSQNVDDVLR.[I]	1xTMTpro [N-Term]	FALSE	1	2	3	A0A7R8US28	A0A7R8US28 [7898-7907]		0	1462.82	0.827	0.639	0.773	62.3	75.3	97.4	28.79	14.78	13.6		High	High	High	High	High	High	High	High	High	High	High	High	High	High	High	High	High	High	High	High	High	High	High	High	High	High
	FALSE	High	[R].LSQNVDDVLR.[I]	1xTMTpro [N-Term]; 1xDeamidated [Q3]	FALSE	1	2	1	A0A7R8US28	A0A7R8US28 [7898-7907]		0	1463.8	4.007	2.301	0.574	224.2	56	97.4	20.39	11.35	47.3		n/a	n/a	n/a	n/a	High	High	High	High	n/a	n/a	n/a	n/a	n/a	n/a	n/a	n/a	High	High	High	High	n/a	n/a	n/a	n/a	n/a	n/a
	FALSE	High	[R].SEDVDSILQR.[N]	1xTMTpro [N-Term]	FALSE	1	2	3	A0A7R8US28	A0A7R8US28 [1326-1335]		0	1465.78	0.988	1.036	1.049	102	103.2	98.5	10.4	21.56	14.17		High	High	High	High	High	High	High	High	High	High	High	High	High	High	High	High	High	High	High	High	High	High	High	High	High	High
	FALSE	High	[K].DLNADQDEIR.[I]	1xTMTpro [N-Term]	FALSE	1	2	1	A0A7R8US28	A0A7R8US28 [6083-6092]		0	1492.76	0.946	1.142	1.207	115.5	122.1	101.2	14.45	11.66	10.39		High	High	High	High	n/a	n/a	n/a	n/a	n/a	n/a	n/a	n/a	High	High	High	High	n/a	n/a	n/a	n/a	n/a	n/a	n/a	n/a	High	High
	FALSE	High	[K].EIILEEQALSR.[S]	1xTMTpro [N-Term]	FALSE	1	2	3	A0A7R8US28	A0A7R8US28 [1315-1325]		0	1604.92	0.987	1.329	1.346	136.1	137.8	102.4	18.54	18.99	8.74		High	High	High	High	High	High	High	High	High	High	High	High	High	High	High	High	High	High	High	High	High	High	High	High	High	High
	FALSE	High	[K].SVPADEQQTITR.[D]	1xTMTpro [N-Term]	FALSE	1	2	3	A0A7R8US28	A0A7R8US28 [1262-1273]		0	1648.88	0.941	1.229	1.307	134.4	142.9	109.4	11.42	21.49	30.24		High	High	High	High	High	High	High	High	n/a	n/a	n/a	n/a	High	High	High	High	High	High	High	High	n/a	n/a	n/a	n/a	High	High
	FALSE	High	[K].SSTEVVIDADGTR.[R]	1xTMTpro [N-Term]	FALSE	1	2	3	A0A7R8US28	A0A7R8US28 [17524-17536]		0	1653.86	1.707	1.288	0.754	127.9	74.9	99.3	13.83	17.51	19.79		High	High	High	High	High	High	High	High	High	High	High	High	High	High	High	High	High	High	High	High	High	High	High	High	High	High
	FALSE	High	[R].AEINQVSDAIMER.[Q]	1xTMTpro [N-Term]; 1xDeamidated [Q5]	FALSE	1	2	1	A0A7R8US28	A0A7R8US28 [2039-2051]		0	1780.91	2.468	2.088	0.846	206.5	83.7	98.9	43.58	9.42	34.31		n/a	n/a	n/a	n/a	High	High	High	High	n/a	n/a	n/a	n/a	n/a	n/a	n/a	n/a	High	High	High	High	n/a	n/a	n/a	n/a	n/a	n/a
	FALSE	High	[R].QQSSDGPSEQK.[M]	1xTMTpro [N-Term]; 1xTMTpro [K11]	FALSE	1	2	1	A0A7R8US28	A0A7R8US28 [18474-18484]		0	1798.94	1.791	0.976	0.545	94.4	52.7	96.7	41.29	40.59	8.35		n/a	n/a	n/a	n/a	High	High	High	High	n/a	n/a	n/a	n/a	n/a	n/a	n/a	n/a	High	High	High	High	n/a	n/a	n/a	n/a	n/a	n/a
	FALSE	High	[R].TEQVTETSEVK.[Q]	1xTMTpro [N-Term]; 1xTMTpro [K11]	FALSE	1	2	2	A0A7R8US28	A0A7R8US28 [10371-10381]		0	1859.03	0.842	1.17	1.39	119.4	141.8	102	17.14	25.21	18.94		High	High	High	High	n/a	n/a	n/a	n/a	High	High	High	High	High	High	High	High	n/a	n/a	n/a	n/a	High	High	High	High	High	High
	FALSE	High	[K].AELDNSGDEIDNLR.[I]	1xTMTpro [N-Term]	FALSE	1	2	3	A0A7R8US28	A0A7R8US28 [2633-2646]		0	1864.92	1.607	1.083	0.674	109.5	68.2	101.1	9.89	29.63	12.62		High	High	High	High	High	High	High	High	n/a	n/a	n/a	n/a	High	High	High	High	High	High	High	High	n/a	n/a	n/a	n/a	High	High
	FALSE	High	[K].NNEIVGDLDVLQDR.[Q]	1xTMTpro [N-Term]	FALSE	1	2	5	A0A7R8US28	A0A7R8US28 [3359-3372]		0	1904	1.302	1.588	1.219	160.2	123	100.9	6.58	26.94	13.71		High	High	High	High	High	High	High	High	High	High	High	High	High	High	High	High	High	High	High	High	High	High	High	High	High	High
	FALSE	High	[K].NNEIVGDLDVLQDR.[Q]	1xDeamidated [N]; 1xTMTpro [N-Term]	FALSE	1	2	2	A0A7R8US28	A0A7R8US28 [3359-3372]		0	1904.99	0.907	1.169	1.289	114.6	126.4	98.1	11.19	26.94	15.09		n/a	n/a	n/a	n/a	High	High	High	High	n/a	n/a	n/a	n/a	n/a	n/a	n/a	n/a	High	High	High	High	n/a	n/a	n/a	n/a	n/a	n/a
	FALSE	High	[K].YDDMSGDNNQVIER.[L]	1xTMTpro [N-Term]	FALSE	1	2	3	A0A7R8US28	A0A7R8US28 [2611-2624]		0	1959.9	1.46	1.348	0.924	139.6	95.7	103.5	27.3	15.46	12.79		High	High	High	High	High	High	High	High	High	High	High	High	High	High	High	High	High	High	High	High	High	High	High	High	High	High
	FALSE	High	[R].LESVTSSFNEQEEDLR.[K]	1xTMTpro [N-Term]	FALSE	1	2	4	A0A7R8US28	A0A7R8US28 [2576-2591]		0	2187.07	1.708	1.167	0.683	117.9	69	101	18.2	14.71	8.2		High	High	High	High	High	High	High	High	High	High	High	High	High	High	High	High	High	High	High	High	High	High	High	High	High	High
	FALSE	High	[K].DVPHEELVESVTEK.[E]	1xTMTpro [N-Term]; 1xTMTpro [K14]	FALSE	1	2	2	A0A7R8US28	A0A7R8US28 [13511-13524]		0	2219.21	1.315	1.255	0.954	130.3	99	103.8	20.09	30.87	13.5		High	High	High	High	n/a	n/a	n/a	n/a	High	High	High	High	High	High	High	High	n/a	n/a	n/a	n/a	High	High	High	High	High	High
	FALSE	High	[K].AVENLENQVNNHEK.[Y]	1xTMTpro [N-Term]; 1xTMTpro [K14]	FALSE	1	2	3	A0A7R8US28	A0A7R8US28 [5688-5701]		0	2246.2	1.04	1.165	1.119	119.6	114.9	102.7	15.3	13.62	8.55		High	High	High	High	High	High	High	High	High	High	High	High	High	High	High	High	High	High	High	High	High	High	High	High	High	High
	FALSE	High	[K].AVENLENQVNNHEK.[Y]	1xTMTpro [N-Term]; 1xDeamidated [N]; 1xTMTpro [K14]	FALSE	1	2	3	A0A7R8US28	A0A7R8US28 [5688-5701]		0	2247.19	0.66	1.104	1.673	113.1	171.5	102.5	37.86	44.31	12.66		n/a	n/a	n/a	n/a	High	High	High	High	High	High	High	High	n/a	n/a	n/a	n/a	High	High	High	High	High	High	High	High	n/a	n/a
	FALSE	High	[R].EEPLEQSPTEEVVTK.[E]	1xTMTpro [N-Term]; 1xTMTpro [K15]	FALSE	1	2	2	A0A7R8US28	A0A7R8US28 [13232-13246]		0	2323.25	0.816	0.955	1.169	98.5	120.6	103.2	15.71	12.99	16.31		n/a	n/a	n/a	n/a	High	High	High	High	High	High	High	High	n/a	n/a	n/a	n/a	High	High	High	High	High	High	High	High	n/a	n/a
	FALSE	High	[R].DTIQSTDLPDETVDTSK.[V]	1xTMTpro [N-Term]; 1xTMTpro [K17]	FALSE	1	2	3	A0A7R8US28	A0A7R8US28 [9599-9615]		0	2473.28	1.087	1.563	1.438	141.5	130.2	90.6	23.04	9.27	37		High	High	High	High	High	High	High	High	High	High	High	High	High	High	High	High	High	High	High	High	High	High	High	High	High	High
	FALSE	High	[K].TITTTTTESTDQIDEAPK.[V]	1xTMTpro [N-Term]; 1xTMTpro [K18]	FALSE	1	2	6	A0A7R8US28	A0A7R8US28 [11468-11485]		0	2560.35	1.465	1.201	0.82	120	81.9	99.9	19.32	12.89	12.12		High	High	High	High	High	High	High	High	High	High	High	High	High	High	High	High	High	High	High	High	High	High	High	High	High	High
	FALSE	High	[K].ILESEAPEGK.[K]	1xTMTpro [N-Term]; 1xTMTpro [K10]	FALSE	1	2	6	A0A7R8US28	A0A7R8US28 [5317-5326]		0	1680.97	1.384	0.945	0.683	96.7	69.9	102.3	22.4	19.96	10.56		High	High	High	High	High	High	High	High	High	High	High	High	High	High	High	High	High	High	High	High	High	High	High	High	High	High
	FALSE	High	[K].AQDWLNTIK.[S]	1xTMTpro [N-Term]; 1xTMTpro [K9]	FALSE	1	2	4	A0A7R8US28	A0A7R8US28 [3133-3141]		0	1696.99	1.011	0.859	0.85	85.6	84.7	99.6	14.66	21.85	2.27		High	High	High	High	High	High	High	High	High	High	High	High	High	High	High	High	High	High	High	High	High	High	High	High	High	High
	FALSE	High	[R].QWNEHEINLDR.[L]	1xTMTpro [N-Term]	FALSE	1	2	2	A0A7R8US28	A0A7R8US28 [4085-4095]		0	1757.89										No Quan Values	High	High	High	High	High	High	High	High	n/a	n/a	n/a	n/a	High	High	High	High	High	High	High	High	n/a	n/a	n/a	n/a	High	High
	FALSE	High	[KQ].ETITEIVETK.[E]	1xTMTpro [N-Term]; 1xTMTpro [K10]	FALSE	1	2	3	A0A7R8US28	A0A7R8US28 [16130-16139]; [16277-16286]		0	1771.03	1.502	1.294	0.862	135.3	90.1	104.5	24.25	18.46	36.16		High	High	High	High	High	High	High	High	High	High	High	High	High	High	High	High	High	High	High	High	High	High	High	High	High	High
	FALSE	High	[R].DINSHSDAIEK.[I]	1xTMTpro [N-Term]; 1xTMTpro [K11]	FALSE	1	2	2	A0A7R8US28	A0A7R8US28 [5645-5655]		0	1836.99	1.226	0.976	0.796	88.3	72	90.5	14.54	12.65	36.87		High	High	High	High	n/a	n/a	n/a	n/a	High	High	High	High	High	High	High	High	n/a	n/a	n/a	n/a	High	High	High	High	High	High
	FALSE	High	[R].ILEGTSPGEDSK.[V]	1xTMTpro [N-Term]; 1xTMTpro [K12]	FALSE	1	2	3	A0A7R8US28	A0A7R8US28 [3933-3944]		0	1841.01	1.006	0.928	0.923	93.4	92.8	100.6	19.12	10.32	22.26		High	High	High	High	High	High	High	High	High	High	High	High	High	High	High	High	High	High	High	High	High	High	High	High	High	High
	FALSE	High	[K].SYNNEISEQQAK.[L]	1xTMTpro [N-Term]; 1xTMTpro [K12]	FALSE	1	2	2	A0A7R8US28	A0A7R8US28 [1985-1996]		0	2019.06	0.978	0.977	0.999	104.3	106.7	106.8	31.25	18.3	24.01		High	High	High	High	n/a	n/a	n/a	n/a	High	High	High	High	High	High	High	High	n/a	n/a	n/a	n/a	High	High	High	High	High	High
	FALSE	High	[R].DLPTAMNEETAAIISR.[K]	1xTMTpro [N-Term]	FALSE	1	2	6	A0A7R8US28	A0A7R8US28 [707-722]		0	2036.07	1.111	0.986	0.887	95.8	86.2	97.1	11.4	15.85	19.07		High	High	High	High	High	High	High	High	High	High	High	High	High	High	High	High	High	High	High	High	High	High	High	High	High	High
	FALSE	High	[R].DISQLQDDYAVLESR.[C]	1xTMTpro [N-Term]	FALSE	1	2	3	A0A7R8US28	A0A7R8US28 [19151-19165]		0	2056.05	1.362	1.184	0.87	121.8	89.4	102.9	23.35	14.01	12.84		High	High	High	High	High	High	High	High	n/a	n/a	n/a	n/a	High	High	High	High	High	High	High	High	n/a	n/a	n/a	n/a	High	High
	FALSE	High	[R].DQTVNAPQPDSLEK.[V]	1xTMTpro [N-Term]; 1xTMTpro [K14]	FALSE	1	2	2	A0A7R8US28	A0A7R8US28 [1532-1545]		0	2150.16	1.073	1.124	1.048	117.4	109.5	104.4	7.04	15.97	16.21		n/a	n/a	n/a	n/a	High	High	High	High	High	High	High	High	n/a	n/a	n/a	n/a	High	High	High	High	High	High	High	High	n/a	n/a
	FALSE	High	[K].VADWLNEAEPSVAGEIR.[Y]	1xTMTpro [N-Term]	FALSE	1	2	2	A0A7R8US28	A0A7R8US28 [6783-6799]		0	2160.13										No Quan Values	n/a	n/a	n/a	n/a	High	High	High	High	High	High	High	High	n/a	n/a	n/a	n/a	High	High	High	High	High	High	High	High	n/a	n/a
	FALSE	High	[K].NIVNEVNSFEEFEK.[E]	1xTMTpro [N-Term]; 1xTMTpro [K14]	FALSE	1	2	3	A0A7R8US28	A0A7R8US28 [1428-1441]		0	2306.22	1.126	1.213	1.077	120.1	106.7	99	14.53	30.92	15.68		High	High	High	High	High	High	High	High	High	High	High	High	High	High	High	High	High	High	High	High	High	High	High	High	High	High
	FALSE	High	[K].NIVNEVNSFEEFEK.[E]	1xTMTpro [N-Term]; 1xDeamidated [N7]; 1xTMTpro [K14]	FALSE	1	2	2	A0A7R8US28	A0A7R8US28 [1428-1441]		0	2307.2	1.014	1.295	1.278	128.3	126.6	99.1	18.06	18.3	18.22		n/a	n/a	n/a	n/a	n/a	n/a	n/a	n/a	High	High	High	High	n/a	n/a	n/a	n/a	n/a	n/a	n/a	n/a	High	High	High	High	n/a	n/a
	FALSE	High	[K].LKEESSDLIQSSGETR.[I]	1xTMTpro [N-Term]; 1xTMTpro [K2]	FALSE	1	2	2	A0A7R8US28	A0A7R8US28 [4143-4158]		1	2387.29	1.392	0.953	0.685	100.4	72.1	105.4	30.46	20.31	20.79		High	High	High	High	High	High	High	High	n/a	n/a	n/a	n/a	High	High	High	High	High	High	High	High	n/a	n/a	n/a	n/a	High	High
	FALSE	High	[R].AQTGQISEINPESVEAK.[L]	1xTMTpro [N-Term]; 1xTMTpro [K17]	FALSE	1	2	3	A0A7R8US28	A0A7R8US28 [2070-2086]		0	2409.31										No Quan Values	High	High	High	High	High	High	High	High	High	High	High	High	High	High	High	High	High	High	High	High	High	High	High	High	High	High
	FALSE	High	[K].NIVNEVNSFEEFEKER.[V]	1xTMTpro [N-Term]; 1xTMTpro [K14]	FALSE	1	2	1	A0A7R8US28	A0A7R8US28 [1428-1443]		1	2591.36										No Quan Values	n/a	n/a	n/a	n/a	n/a	n/a	n/a	n/a	High	High	High	High	n/a	n/a	n/a	n/a	n/a	n/a	n/a	n/a	High	High	High	High	n/a	n/a
	FALSE	High	[K].NIVNEVNSFEEFEKER.[V]	1xTMTpro [N-Term]; 1xDeamidated [N7]; 1xTMTpro [K14]	FALSE	1	2	1	A0A7R8US28	A0A7R8US28 [1428-1443]		1	2592.34										No Quan Values	n/a	n/a	n/a	n/a	n/a	n/a	n/a	n/a	High	High	High	High	n/a	n/a	n/a	n/a	n/a	n/a	n/a	n/a	High	High	High	High	n/a	n/a
	FALSE	High	[K].LEEANKEIILEEQALSR.[S]	1xTMTpro [N-Term]; 1xTMTpro [K6]	FALSE	1	2	1	A0A7R8US28	A0A7R8US28 [1309-1325]		1	2593.47	1.123	1.05	0.935	107	95.3	101.9	18.65	32.52	12.18		n/a	n/a	n/a	n/a	n/a	n/a	n/a	n/a	High	High	High	High	n/a	n/a	n/a	n/a	n/a	n/a	n/a	n/a	High	High	High	High	n/a	n/a
	FALSE	High	[K].YTDIINEIEQSPATIEEK.[I]	1xTMTpro [N-Term]; 1xTMTpro [K18]	FALSE	1	2	5	A0A7R8US28	A0A7R8US28 [6993-7010]		0	2701.44	0.966	1.042	1.079	103.3	107	99.1	7.32	21.83	2.39		High	High	High	High	High	High	High	High	High	High	High	High	High	High	High	High	High	High	High	High	High	High	High	High	High	High
	FALSE	High	[R].IEALPTEVQQVETEIPAEK.[S]	1xTMTpro [N-Term]; 1xTMTpro [K19]	FALSE	1	2	2	A0A7R8US28	A0A7R8US28 [16341-16359]		0	2732.52	1.084	1.204	1.111	87.4	80.7	72.6	51.82	55.68	67.17		High	High	High	High	n/a	n/a	n/a	n/a	High	High	High	High	High	High	High	High	n/a	n/a	n/a	n/a	High	High	High	High	High	High
	FALSE	High	[K].SLTSCEEGIDNLPNESLEK.[M]	1xTMTpro [N-Term]; 1xCarbamidomethyl [C5]; 1xTMTpro [K19]	FALSE	1	2	2	A0A7R8US28	A0A7R8US28 [17195-17213]		0	2743.4	1.329	1.005	0.756	108.1	81.4	107.6	14.29	12.71	23.49		High	High	High	High	High	High	High	High	n/a	n/a	n/a	n/a	High	High	High	High	High	High	High	High	n/a	n/a	n/a	n/a	High	High
	FALSE	High	[K].EQVESVQITEVKDEEPK.[V]	1xTMTpro [N-Term]; 2xTMTpro [K12; K17]	FALSE	1	2	2	A0A7R8US28	A0A7R8US28 [10849-10865]		1	2899.61	2.576	1.355	0.526	130.2	50.5	96.1	39.44	63.09	26.16		High	High	High	High	n/a	n/a	n/a	n/a	High	High	High	High	High	High	High	High	n/a	n/a	n/a	n/a	High	High	High	High	High	High
	FALSE	High	[K].VPLDPVPTEEQVISEEVTTIK.[S]	1xTMTpro [N-Term]; 1xTMTpro [K21]	FALSE	1	2	5	A0A7R8US28	A0A7R8US28 [13553-13573]		0	2931.64	1.857	1.243	0.669	125.6	67.7	101.1	27.61	29.24	5.21		High	High	High	High	High	High	High	High	High	High	High	High	High	High	High	High	High	High	High	High	High	High	High	High	High	High
	FALSE	High	[K].VPLDPVPTEEQVISEEVTTIK.[S]	1xTMTpro [N-Term]; 1xDeamidated [Q11]; 1xTMTpro [K21]	FALSE	1	2	1	A0A7R8US28	A0A7R8US28 [13553-13573]		0	2932.63										No Quan Values	n/a	n/a	n/a	n/a	n/a	n/a	n/a	n/a	High	High	High	High	n/a	n/a	n/a	n/a	n/a	n/a	n/a	n/a	High	High	High	High	n/a	n/a
	FALSE	High	[K].TLDSLLSYATEEESAVEQK.[K]	1xTMTpro [N-Term]; 1xTMTpro [K19]	FALSE	1	2	1	A0A7R8US28	A0A7R8US28 [1466-1484]		0	2721.43	0.985	0.908	0.921	90.7	92	99.9	17.17	12.82	7.12		High	High	High	High	n/a	n/a	n/a	n/a	n/a	n/a	n/a	n/a	High	High	High	High	n/a	n/a	n/a	n/a	n/a	n/a	n/a	n/a	High	High
	FALSE	High	[K].EIDQHAPTITDLVNQGNEIENETDLHLK.[L]	1xTMTpro [N-Term]; 1xTMTpro [K28]	FALSE	1	2	8	A0A7R8US28	A0A7R8US28 [3279-3306]		0	3794.97	1.011	1.167	1.154	120	118.8	102.9	17.84	10.34	13.25		High	High	High	High	High	High	High	High	High	High	High	High	High	High	High	High	High	High	High	High	High	High	High	High	High	High
	FALSE	High	[K].EIDQHAPTITDLVNQGNEIENETDLHLK.[L]	1xTMTpro [N-Term]; 1xDeamidated [N/Q]; 1xTMTpro [K28]	FALSE	1	2	6	A0A7R8US28	A0A7R8US28 [3279-3306]		0	3795.95										No Quan Values	High	High	High	High	n/a	n/a	n/a	n/a	n/a	n/a	n/a	n/a	High	High	High	High	n/a	n/a	n/a	n/a	n/a	n/a	n/a	n/a	High	High
	FALSE	High	[R].LLEQINEVR.[Q]	1xTMTpro [N-Term]	FALSE	1	2	3	A0A7R8US28	A0A7R8US28 [5580-5588]		0	1417.83	1.171	0.996	0.85	89.9	76.7	90.3	4.53	6.32	24.02		High	High	High	High	High	High	High	High	High	High	High	High	High	High	High	High	High	High	High	High	High	High	High	High	High	High
	FALSE	High	[K].AGVLVEQTK.[D]	1xTMTpro [N-Term]; 1xTMTpro [K9]	FALSE	1	2	2	A0A7R8US28	A0A7R8US28 [3506-3514]		0	1552.96	0.556	0.969	1.743	93.1	167.6	96.2	14.06	26.67	16.62		High	High	High	High	High	High	High	High	n/a	n/a	n/a	n/a	High	High	High	High	High	High	High	High	n/a	n/a	n/a	n/a	High	High
	FALSE	High	[K].FNAWVDEAENR.[L]	1xTMTpro [N-Term]	FALSE	1	2	1	A0A7R8US28	A0A7R8US28 [7194-7204]		0	1654.81	1.208	0.864	0.715	86.5	71.6	100.1	10.17	19.66	6.08		High	High	High	High	n/a	n/a	n/a	n/a	n/a	n/a	n/a	n/a	High	High	High	High	n/a	n/a	n/a	n/a	n/a	n/a	n/a	n/a	High	High
	FALSE	High	[K].EAYDDLSSWIGR.[A]	1xTMTpro [N-Term]	FALSE	1	2	2	A0A7R8US28	A0A7R8US28 [4840-4851]		0	1715.86	1.126	0.848	0.753	84.2	74.8	99.4	13.14	19.41	8.99		High	High	High	High	High	High	High	High	n/a	n/a	n/a	n/a	High	High	High	High	High	High	High	High	n/a	n/a	n/a	n/a	High	High
	FALSE	High	[K].FENLQETVGK.[A]	1xTMTpro [N-Term]; 1xTMTpro [K10]	FALSE	1	2	2	A0A7R8US28	A0A7R8US28 [5678-5687]		0	1773	1.108	0.896	0.808	90.3	81.4	100.8	14.44	5.05	5.42		n/a	n/a	n/a	n/a	High	High	High	High	High	High	High	High	n/a	n/a	n/a	n/a	High	High	High	High	High	High	High	High	n/a	n/a
	FALSE	High	[R].LETAFDVAESK.[L]	1xTMTpro [N-Term]; 1xTMTpro [K11]	FALSE	1	2	2	A0A7R8US28	A0A7R8US28 [535-545]		0	1818.01	1.979	0.78	0.394	82.4	41.6	105.7	36.8	54.24	35.68		High	High	High	High	High	High	High	High	n/a	n/a	n/a	n/a	High	High	High	High	High	High	High	High	n/a	n/a	n/a	n/a	High	High
	FALSE	High	[K].VVINTEPNGAAK.[V]	1xTMTpro [N-Term]; 1xDeamidated [N8]; 1xTMTpro [K12]	FALSE	1	2	3	A0A7R8US28	A0A7R8US28 [5554-5565]		0	1822.06	1.474	1.139	0.772	113.2	76.8	99.5	37.42	30.04	11.57		High	High	High	High	High	High	High	High	High	High	High	High	High	High	High	High	High	High	High	High	High	High	High	High	High	High
	FALSE	High	[K].ELQANIEDLAK.[N]	1xTMTpro [N-Term]; 1xTMTpro [K11]	FALSE	1	2	2	A0A7R8US28	A0A7R8US28 [3348-3358]		0	1852.07	1.083	1.134	1.047	122.2	112.8	107.8	7.42	7.75	18.87		High	High	High	High	n/a	n/a	n/a	n/a	High	High	High	High	High	High	High	High	n/a	n/a	n/a	n/a	High	High	High	High	High	High
	FALSE	High	[K].SVDLESLANDAK.[D]	1xTMTpro [N-Term]; 1xTMTpro [K12]	FALSE	1	2	3	A0A7R8US28	A0A7R8US28 [6071-6082]		0	1870.04	1.088	1.221	1.122	124.2	114.1	101.7	12.17	15.16	6.46		High	High	High	High	High	High	High	High	High	High	High	High	High	High	High	High	High	High	High	High	High	High	High	High	High	High
	FALSE	High	[K].VVEIQDSLGEGK.[R]	1xTMTpro [N-Term]; 1xTMTpro [K12]	FALSE	1	2	3	A0A7R8US28	A0A7R8US28 [4018-4029]		0	1882.08	1.204	1.026	0.852	105	87.3	102.4	2.54	9.61	14.29		High	High	High	High	High	High	High	High	High	High	High	High	High	High	High	High	High	High	High	High	High	High	High	High	High	High
	FALSE	High	[K].EIDLPQIPDQK.[V]	1xTMTpro [N-Term]; 1xTMTpro [K11]	FALSE	1	2	2	A0A7R8US28	A0A7R8US28 [16215-16225]; [16362-16372]		0	1904.1	1.231	0.821	0.667	86.2	70	105	37.85	18.06	18.86		High	High	High	High	High	High	High	High	n/a	n/a	n/a	n/a	High	High	High	High	High	High	High	High	n/a	n/a	n/a	n/a	High	High
	FALSE	High	[R].NPQDTSLSEAYK.[Q]	1xTMTpro [N-Term]; 1xTMTpro [K12]	FALSE	1	2	1	A0A7R8US28	A0A7R8US28 [1367-1378]		0	1961.05	1.085	1.058	0.976	101.1	93.3	95.6	19.49	16.89	9.38		n/a	n/a	n/a	n/a	n/a	n/a	n/a	n/a	High	High	High	High	n/a	n/a	n/a	n/a	n/a	n/a	n/a	n/a	High	High	High	High	n/a	n/a
	FALSE	High	[R].NPQDTSLSEAYK.[Q]	1xTMTpro [N-Term]; 1xDeamidated [Q3]; 1xTMTpro [K12]	FALSE	1	2	2	A0A7R8US28	A0A7R8US28 [1367-1378]		0	1962.03	1.014	1.055	1.041	105.6	104.2	100.1	17.11	10.5	6.18		High	High	High	High	High	High	High	High	n/a	n/a	n/a	n/a	High	High	High	High	High	High	High	High	n/a	n/a	n/a	n/a	High	High
	FALSE	High	[K].VVETVTQVPQEK.[E]	1xTMTpro [N-Term]; 1xTMTpro [K12]	FALSE	1	2	2	A0A7R8US28	A0A7R8US28 [16180-16191]		0	1965.15										No Quan Values	High	High	High	High	n/a	n/a	n/a	n/a	High	High	High	High	High	High	High	High	n/a	n/a	n/a	n/a	High	High	High	High	High	High
	FALSE	High	[K].VIETITQVPQEK.[E]	1xTMTpro [N-Term]; 1xTMTpro [K12]	FALSE	1	2	1	A0A7R8US28	A0A7R8US28 [16327-16338]		0	1993.18	1.089	0.91	0.835	89.6	82.2	98.5	22.97	18.59	16.47		High	High	High	High	n/a	n/a	n/a	n/a	n/a	n/a	n/a	n/a	High	High	High	High	n/a	n/a	n/a	n/a	n/a	n/a	n/a	n/a	High	High
	FALSE	High	[K].IQGCEGSLATATDK.[G]	1xTMTpro [N-Term]; 1xCarbamidomethyl [C4]; 1xTMTpro [K14]	FALSE	1	2	3	A0A7R8US28	A0A7R8US28 [7021-7034]		0	2059.1	0.977	1.08	1.105	108.4	110.9	100.3	16.51	20.03	13.66		High	High	High	High	High	High	High	High	High	High	High	High	High	High	High	High	High	High	High	High	High	High	High	High	High	High
	FALSE	High	[K].ESVDTLFPGVEEPK.[V]	1xTMTpro [N-Term]; 1xTMTpro [K14]	FALSE	1	2	4	A0A7R8US28	A0A7R8US28 [16934-16947]		0	2155.18	1.3	1.193	0.918	120.6	92.8	101.1	6.09	7.6	8.82		High	High	High	High	High	High	High	High	High	High	High	High	High	High	High	High	High	High	High	High	High	High	High	High	High	High
	FALSE	High	[K].SEALDILSQTTFEK.[E]	1xTMTpro [N-Term]; 1xDeamidated [Q9]; 1xTMTpro [K14]	FALSE	1	2	3	A0A7R8US28	A0A7R8US28 [3142-3155]		0	2191.2	1.931	1.386	0.718	129.9	67.3	93.8	33.55	10.08	28.72		High	High	High	High	High	High	High	High	High	High	High	High	High	High	High	High	High	High	High	High	High	High	High	High	High	High
	FALSE	High	[K].FQEYEDTLDSIMK.[N]	1xTMTpro [N-Term]; 1xTMTpro [K13]	FALSE	1	2	6	A0A7R8US28	A0A7R8US28 [6231-6243]		0	2227.14	1.272	1.174	0.923	115.9	91.1	98.7	10.79	19.16	6.44		High	High	High	High	High	High	High	High	High	High	High	High	High	High	High	High	High	High	High	High	High	High	High	High	High	High
	FALSE	High	[K].ASDLQQALPASEISTK.[Y]	1xTMTpro [N-Term]; 1xDeamidated [Q]; 1xTMTpro [K16]	FALSE	1	2	6	A0A7R8US28	A0A7R8US28 [5237-5252]		0	2268.26	1.407	1.092	0.776	107	76	98	21.58	16.01	16.68		High	High	High	High	High	High	High	High	High	High	High	High	High	High	High	High	High	High	High	High	High	High	High	High	High	High
	FALSE	High	[K].TVQNEVPNTWTSAQEIR.[S]	1xTMTpro [N-Term]	FALSE	1	2	2	A0A7R8US28	A0A7R8US28 [3887-3903]		0	2277.18	1.196	1.027	0.859	102.1	85.4	99.4	19.42	10.75	3.96		n/a	n/a	n/a	n/a	High	High	High	High	High	High	High	High	n/a	n/a	n/a	n/a	High	High	High	High	High	High	High	High	n/a	n/a
	FALSE	High	[K].TVQNEVPNTWTSAQEIR.[S]	1xTMTpro [N-Term]; 1xDeamidated [N8]	FALSE	1	2	1	A0A7R8US28	A0A7R8US28 [3887-3903]		0	2278.16										No Quan Values	High	High	High	High	n/a	n/a	n/a	n/a	n/a	n/a	n/a	n/a	High	High	High	High	n/a	n/a	n/a	n/a	n/a	n/a	n/a	n/a	High	High
	FALSE	High	[K].ATEILDGCAVGGDMHK.[V]	1xTMTpro [N-Term]; 1xCarbamidomethyl [C8]; 1xTMTpro [K16]	FALSE	1	2	2	A0A7R8US28	A0A7R8US28 [5928-5943]		0	2282.18	1.094	1.406	1.286	137.4	125.7	97.7	23.61	19.74	8.34		High	High	High	High	n/a	n/a	n/a	n/a	High	High	High	High	High	High	High	High	n/a	n/a	n/a	n/a	High	High	High	High	High	High
	FALSE	High	[R].ISSTIAEEAEVSTVLK.[D]	1xTMTpro [N-Term]; 1xTMTpro [K16]	FALSE	1	2	1	A0A7R8US28	A0A7R8US28 [19051-19066]		0	2285.31	1.244	1.111	0.893	106.5	85.6	95.9	9.29	3.11	17.89		High	High	High	High	n/a	n/a	n/a	n/a	n/a	n/a	n/a	n/a	High	High	High	High	n/a	n/a	n/a	n/a	n/a	n/a	n/a	n/a	High	High
	FALSE	High	[K].ELPSESIVTVTEIIEK.[A]	1xTMTpro [N-Term]; 1xTMTpro [K16]	FALSE	1	2	3	A0A7R8US28	A0A7R8US28 [9837-9852]		0	2395.38	2.074	1.277	0.616	121.3	58.5	95	29.68	57.2	20.42		High	High	High	High	High	High	High	High	High	High	High	High	High	High	High	High	High	High	High	High	High	High	High	High	High	High
	FALSE	High	[R].VRDQTVNAPQPDSLEK.[V]	1xTMTpro [N-Term]; 1xTMTpro [K16]	FALSE	1	2	1	A0A7R8US28	A0A7R8US28 [1530-1545]		1	2405.33	1.03	0.996	0.967	95.5	92.7	95.9	14.97	7.58	14.44		n/a	n/a	n/a	n/a	n/a	n/a	n/a	n/a	High	High	High	High	n/a	n/a	n/a	n/a	n/a	n/a	n/a	n/a	High	High	High	High	n/a	n/a
	FALSE	High	[R].QDAEMSLQDQVIDLLK.[W]	1xTMTpro [N-Term]; 1xTMTpro [K16]	FALSE	1	2	6	A0A7R8US28	A0A7R8US28 [586-601]		0	2454.34	1.136	0.964	0.849	103.7	91.3	107.6	30.61	17.01	23.14		High	High	High	High	High	High	High	High	High	High	High	High	High	High	High	High	High	High	High	High	High	High	High	High	High	High
	FALSE	High	[R].QDAEMSLQDQVIDLLK.[W]	1xTMTpro [N-Term]; 1xOxidation [M5]; 1xTMTpro [K16]	FALSE	1	2	2	A0A7R8US28	A0A7R8US28 [586-601]		0	2470.34	1.063	0.937	0.881	93	87.5	99.3	14.31	0.85	5.36		High	High	High	High	High	High	High	High	n/a	n/a	n/a	n/a	High	High	High	High	High	High	High	High	n/a	n/a	n/a	n/a	High	High
	FALSE	High	[R].EILGELSQEIENAYEK.[L]	1xTMTpro [N-Term]; 1xTMTpro [K16]	FALSE	1	2	2	A0A7R8US28	A0A7R8US28 [7649-7664]		0	2473.33	1.022	1.016	0.994	105.9	103.6	104.2	15.24	7.53	9.58		High	High	High	High	n/a	n/a	n/a	n/a	High	High	High	High	High	High	High	High	n/a	n/a	n/a	n/a	High	High	High	High	High	High
	FALSE	High	[K].ELETGWNDTYTETVDHLK.[S]	1xTMTpro [N-Term]; 1xTMTpro [K18]	FALSE	1	2	4	A0A7R8US28	A0A7R8US28 [1593-1610]		0	2759.4	1.277	1.071	0.839	109.9	86.1	102.6	15.38	11.89	10.3		High	High	High	High	High	High	High	High	High	High	High	High	High	High	High	High	High	High	High	High	High	High	High	High	High	High
	FALSE	High	[R].AADVANIISNLDGQQVEEQMK.[S]	1xTMTpro [N-Term]; 1xTMTpro [K21]	FALSE	1	2	5	A0A7R8US28	A0A7R8US28 [6506-6526]		0	2881.52	0.999	0.866	0.867	85.6	85.7	98.9	14.53	26.33	18.01		High	High	High	High	High	High	High	High	High	High	High	High	High	High	High	High	High	High	High	High	High	High	High	High	High	High
	FALSE	High	[R].TSVSENSEWVIQQENAVDAFEK.[A]	1xTMTpro [N-Term]; 1xTMTpro [K22]	FALSE	1	2	3	A0A7R8US28	A0A7R8US28 [20038-20059]		0	3118.58	1.165	0.918	0.788	94.9	81.5	103.4	20.26	6.31	12.37		High	High	High	High	High	High	High	High	High	High	High	High	High	High	High	High	High	High	High	High	High	High	High	High	High	High
	FALSE	High	[R].TSVSENSEWVIQQENAVDAFEK.[A]	1xTMTpro [N-Term]; 1xDeamidated [Q]; 1xTMTpro [K22]	FALSE	1	2	2	A0A7R8US28	A0A7R8US28 [20038-20059]		0	3119.57	1.028	0.969	0.943	97	94.4	100.1	14.56	8.18	9.82		High	High	High	High	n/a	n/a	n/a	n/a	n/a	n/a	n/a	n/a	High	High	High	High	n/a	n/a	n/a	n/a	n/a	n/a	n/a	n/a	High	High
	FALSE	High	[K].KAEDMYNTLPTEMKDETELR.[L]	1xTMTpro [N-Term]; 2xTMTpro [K1; K14]	FALSE	1	2	2	A0A7R8US28	A0A7R8US28 [2385-2404]		2	3326.74	1.06	1.155	1.089	113.2	106.8	98	20.87	12.73	11.21		High	High	High	High	High	High	High	High	n/a	n/a	n/a	n/a	High	High	High	High	High	High	High	High	n/a	n/a	n/a	n/a	High	High
	FALSE	High	[K].KAEDMYNTLPTEMKDETELR.[L]	1xTMTpro [N-Term]; 2xTMTpro [K1; K14]; 1xDeamidated [N7]	FALSE	1	2	1	A0A7R8US28	A0A7R8US28 [2385-2404]		2	3327.73										No Quan Values	n/a	n/a	n/a	n/a	n/a	n/a	n/a	n/a	High	High	High	High	n/a	n/a	n/a	n/a	n/a	n/a	n/a	n/a	High	High	High	High	n/a	n/a
	FALSE	High	[K].TTIVTTVK.[T]	1xTMTpro [N-Term]; 1xTMTpro [K8]	FALSE	1	2	3	A0A7R8US28	A0A7R8US28 [10354-10361]		0	1470.94	1.449	1.007	0.695	106.2	73.3	105.5	24.53	24.81	18.96		High	High	High	High	High	High	High	High	High	High	High	High	High	High	High	High	High	High	High	High	High	High	High	High	High	High
	FALSE	High	[K].VIPGTVESGK.[V]	1xTMTpro [N-Term]; 1xTMTpro [K10]	FALSE	1	2	2	A0A7R8US28	A0A7R8US28 [4471-4480]		0	1594.97	1.583	0.786	0.496	82.9	52.3	105.5	39.58	30.47	12.82		n/a	n/a	n/a	n/a	High	High	High	High	High	High	High	High	n/a	n/a	n/a	n/a	High	High	High	High	High	High	High	High	n/a	n/a
	FALSE	High	[K].SYLEVGIVK.[W]	1xTMTpro [N-Term]; 1xTMTpro [K9]	FALSE	1	2	3	A0A7R8US28	A0A7R8US28 [5374-5382]		0	1615.99	1.242	0.963	0.775	91.5	73.7	95	24.74	22.87	12.88		High	High	High	High	High	High	High	High	High	High	High	High	High	High	High	High	High	High	High	High	High	High	High	High	High	High
	FALSE	High	[K].TLLDSLQQK.[R]	1xTMTpro [N-Term]; 1xTMTpro [K9]	FALSE	1	2	4	A0A7R8US28	A0A7R8US28 [7844-7852]		0	1654	0.997	0.905	0.908	84.5	84.8	93.5	4.43	11.36	13.64		High	High	High	High	High	High	High	High	High	High	High	High	High	High	High	High	High	High	High	High	High	High	High	High	High	High
	FALSE	High	[K].FGEGPLAEIK.[R]	1xTMTpro [N-Term]; 1xTMTpro [K10]	FALSE	1	2	2	A0A7R8US28	A0A7R8US28 [6714-6723]		0	1668.98	1.18	1.008	0.855	104.4	88.5	103.6	3.98	4.73	8.46		n/a	n/a	n/a	n/a	High	High	High	High	High	High	High	High	n/a	n/a	n/a	n/a	High	High	High	High	High	High	High	High	n/a	n/a
	FALSE	High	[R].LNTINEGIINIR.[K]	1xTMTpro [N-Term]	FALSE	1	2	2	A0A7R8US28	A0A7R8US28 [19069-19080]		0	1673.99	1.066	0.861	0.808	80.5	75.6	93.6	4.72	11.39	15.58		n/a	n/a	n/a	n/a	High	High	High	High	High	High	High	High	n/a	n/a	n/a	n/a	High	High	High	High	High	High	High	High	n/a	n/a
	FALSE	High	[R].LNQIQDLIK.[K]	1xTMTpro [N-Term]; 1xTMTpro [K9]	FALSE	1	2	7	A0A7R8US28	A0A7R8US28 [5092-5100]		0	1693.05	0.949	0.877	0.924	84	88.5	95.8	3.78	5.54	10.27		High	High	High	High	High	High	High	High	High	High	High	High	High	High	High	High	High	High	High	High	High	High	High	High	High	High
	FALSE	High	[R].IIELFEHAK.[A]	1xTMTpro [N-Term]; 1xTMTpro [K9]	FALSE	1	2	1	A0A7R8US28	A0A7R8US28 [737-745]		0	1708.03	0.886	0.789	0.891	77.4	87.4	98.1	19.99	18.35	29.21		High	High	High	High	n/a	n/a	n/a	n/a	n/a	n/a	n/a	n/a	High	High	High	High	n/a	n/a	n/a	n/a	n/a	n/a	n/a	n/a	High	High
	FALSE	High	[K].AEMDSWIQK.[A]	1xTMTpro [N-Term]; 1xTMTpro [K9]	FALSE	1	2	4	A0A7R8US28	A0A7R8US28 [5919-5927]		0	1715.93	1.122	1.027	0.916	104.6	93.2	101.8	3.77	10.12	6.25		High	High	High	High	High	High	High	High	High	High	High	High	High	High	High	High	High	High	High	High	High	High	High	High	High	High
	FALSE	High	[R].VVSLQDAADQLLR.[S]	1xTMTpro [N-Term]	FALSE	1	2	2	A0A7R8US28	A0A7R8US28 [20557-20569]		0	1731.99	1.323	0.96	0.726	94.6	71.5	98.5	5.11	9.22	6.2		High	High	High	High	n/a	n/a	n/a	n/a	High	High	High	High	High	High	High	High	n/a	n/a	n/a	n/a	High	High	High	High	High	High
	FALSE	High	[R].EFLLDLESHK.[N]	1xTMTpro [N-Term]; 1xTMTpro [K10]	FALSE	1	2	1	A0A7R8US28	A0A7R8US28 [20433-20442]		0	1839.05	1.139	0.758	0.665	76.3	66.9	100.7	22.67	37.69	5.37		High	High	High	High	n/a	n/a	n/a	n/a	n/a	n/a	n/a	n/a	High	High	High	High	n/a	n/a	n/a	n/a	n/a	n/a	n/a	n/a	High	High
	FALSE	High	[K].DLEYIEAIFK.[R]	1xTMTpro [N-Term]; 1xTMTpro [K10]	FALSE	1	2	5	A0A7R8US28	A0A7R8US28 [7506-7515]		0	1849.06	0.896	1.091	1.217	111.3	124.2	102.1	12.13	4.91	17.88		High	High	High	High	High	High	High	High	High	High	High	High	High	High	High	High	High	High	High	High	High	High	High	High	High	High
	FALSE	High	[K].AEIGQIQDWVK.[E]	1xTMTpro [N-Term]; 1xTMTpro [K11]	FALSE	1	2	7	A0A7R8US28	A0A7R8US28 [6558-6568]		0	1895.09	1.561	1.067	0.684	102	65.3	95.6	10.18	17.26	14.9		High	High	High	High	High	High	High	High	High	High	High	High	High	High	High	High	High	High	High	High	High	High	High	High	High	High
	FALSE	High	[K].EITVELPVDVAMK.[V]	1xTMTpro [N-Term]; 1xTMTpro [K13]	FALSE	1	2	3	A0A7R8US28	A0A7R8US28 [9467-9479]		0	2052.19	1.801	1.274	0.708	118.2	65.6	92.7	34.64	55.4	22.48		High	High	High	High	High	High	High	High	High	High	High	High	High	High	High	High	High	High	High	High	High	High	High	High	High	High
	FALSE	High	[K].ALVDMQQVVGEYK.[R]	1xTMTpro [N-Term]; 1xTMTpro [K13]	FALSE	1	2	2	A0A7R8US28	A0A7R8US28 [835-847]		0	2088.17	1.177	0.804	0.683	82	69.6	102	9.24	13.04	12.23		High	High	High	High	n/a	n/a	n/a	n/a	High	High	High	High	High	High	High	High	n/a	n/a	n/a	n/a	High	High	High	High	High	High
	FALSE	High	[K].IWPSLNNIEQEELGR.[E]	1xTMTpro [N-Term]	FALSE	1	2	1	A0A7R8US28	A0A7R8US28 [7249-7263]		0	2102.12	1.051	1.08	1.027	106.3	101.1	98.4	17.83	4.43	9.24		n/a	n/a	n/a	n/a	n/a	n/a	n/a	n/a	High	High	High	High	n/a	n/a	n/a	n/a	n/a	n/a	n/a	n/a	High	High	High	High	n/a	n/a
	FALSE	High	[R].YTNLPVLEEQLAK.[Y]	1xTMTpro [N-Term]; 1xTMTpro [K13]	FALSE	1	2	2	A0A7R8US28	A0A7R8US28 [6800-6812]		0	2126.24	1.49	0.757	0.508	74.9	50.3	98.9	34.6	33.33	6.78		High	High	High	High	High	High	High	High	n/a	n/a	n/a	n/a	High	High	High	High	High	High	High	High	n/a	n/a	n/a	n/a	High	High
	FALSE	High	[R].KSTSPAGIEAIEK.[E]	1xTMTpro [N-Term]; 2xTMTpro [K1; K13]	FALSE	1	2	2	A0A7R8US28	A0A7R8US28 [3617-3629]		1	2243.34	1.362	1.159	0.851	119.1	87.5	102.7	21.07	22.87	10.85		High	High	High	High	High	High	High	High	n/a	n/a	n/a	n/a	High	High	High	High	High	High	High	High	n/a	n/a	n/a	n/a	High	High
	FALSE	High	[K].ITETVTTITPVLTEK.[T]	1xTMTpro [N-Term]; 1xTMTpro [K15]	FALSE	1	2	2	A0A7R8US28	A0A7R8US28 [11133-11147]		0	2254.34	1.643	1.063	0.647	110	66.9	103.5	21.59	31.58	25.2		High	High	High	High	n/a	n/a	n/a	n/a	High	High	High	High	High	High	High	High	n/a	n/a	n/a	n/a	High	High	High	High	High	High
	FALSE	High	[K].VIQEDIPGMIAVTTIK.[T]	1xTMTpro [N-Term]; 1xTMTpro [K16]	FALSE	1	2	2	A0A7R8US28	A0A7R8US28 [10995-11010]		0	2336.38	0.989	1.043	1.055	98.1	99.1	94	17.24	15.86	13.88		High	High	High	High	n/a	n/a	n/a	n/a	High	High	High	High	High	High	High	High	n/a	n/a	n/a	n/a	High	High	High	High	High	High
	FALSE	High	[R].LPIEEVVISEYPTTTK.[D]	1xTMTpro [N-Term]; 1xTMTpro [K16]	FALSE	1	2	3	A0A7R8US28	A0A7R8US28 [13322-13337]		0	2427.39	1.263	1.242	0.984	119.8	94.9	96.5	14.12	12.64	14.75		High	High	High	High	n/a	n/a	n/a	n/a	High	High	High	High	High	High	High	High	n/a	n/a	n/a	n/a	High	High	High	High	High	High
	FALSE	High	[K].GLSWADILNQDAAPIEPK.[I]	1xTMTpro [N-Term]; 1xTMTpro [K18]	FALSE	1	2	1	A0A7R8US28	A0A7R8US28 [14045-14062]		0	2546.41	1.78	0.947	0.532	97.2	54.6	102.6	52.52	17.67	29.09		n/a	n/a	n/a	n/a	n/a	n/a	n/a	n/a	High	High	High	High	n/a	n/a	n/a	n/a	n/a	n/a	n/a	n/a	High	High	High	High	n/a	n/a
	FALSE	High	[K].GLSWADILNQDAAPIEPK.[I]	1xTMTpro [N-Term]; 2xDeamidated [N9; Q10]; 1xTMTpro [K18]	FALSE	1	2	1	A0A7R8US28	A0A7R8US28 [14045-14062]		0	2548.38										No Quan Values	High	High	High	High	n/a	n/a	n/a	n/a	n/a	n/a	n/a	n/a	High	High	High	High	n/a	n/a	n/a	n/a	n/a	n/a	n/a	n/a	High	High
	FALSE	High	[R].GILESLESNIDKETK.[E]	1xTMTpro [N-Term]; 2xTMTpro [K12; K15]	FALSE	1	2	1	A0A7R8US28	A0A7R8US28 [18711-18725]		1	2588.5	1.316	1.089	0.827	112.3	85.4	103.2	16.06	5.12	12.52		High	High	High	High	n/a	n/a	n/a	n/a	n/a	n/a	n/a	n/a	High	High	High	High	n/a	n/a	n/a	n/a	n/a	n/a	n/a	n/a	High	High
	FALSE	High	[K].NAIQEIIVEFEAQKPSYK.[E]	1xTMTpro [N-Term]; 2xTMTpro [K14; K18]	FALSE	1	2	5	A0A7R8US28	A0A7R8US28 [7437-7454]		0	3019.73	0.826	0.952	1.152	98.3	119	103.3	23.11	9.96	6.17		High	High	High	High	High	High	High	High	High	High	High	High	High	High	High	High	High	High	High	High	High	High	High	High	High	High
	FALSE	High	[K].KLQDQQDNLLSTSDDAFATSVR.[M]	1xTMTpro [N-Term]; 1xTMTpro [K1]	FALSE	1	2	1	A0A7R8US28	A0A7R8US28 [19644-19665]		1	3060.61	1.303	1.345	1.032	138	105.9	102.6	22.7	8.69	14.16		High	High	High	High	n/a	n/a	n/a	n/a	n/a	n/a	n/a	n/a	High	High	High	High	n/a	n/a	n/a	n/a	n/a	n/a	n/a	n/a	High	High
	FALSE	High	[K].WDEFETVIDSIDTWLK.[N]	1xTMTpro [N-Term]; 1xTMTpro [K16]	FALSE	1	2	3	A0A7R8US28	A0A7R8US28 [3233-3248]		0	2605.37	1.079	1.117	1.035	113.7	105.5	101.9	13.31	33.38	12.56		High	High	High	High	High	High	High	High	High	High	High	High	High	High	High	High	High	High	High	High	High	High	High	High	High	High
	FALSE	High	[K].IASEGTTADR.[N]	1xTMTpro [N-Term]	FALSE	1	2	1	A0A7R8US28	A0A7R8US28 [7038-7047]		0	1324.7	1.033	1.011	0.979	101.1	97.9	100	15.59	16.84	10.53		n/a	n/a	n/a	n/a	High	High	High	High	n/a	n/a	n/a	n/a	n/a	n/a	n/a	n/a	High	High	High	High	n/a	n/a	n/a	n/a	n/a	n/a
	FALSE	High	[K].ESENVLENQDLQR.[T]	1xTMTpro [N-Term]	FALSE	1	2	1	A0A7R8US28	A0A7R8US28 [17238-17250]		0	1877.95	1.337	1.152	0.861	118	88.2	102.4	5.59	15.86	15.58		n/a	n/a	n/a	n/a	n/a	n/a	n/a	n/a	High	High	High	High	n/a	n/a	n/a	n/a	n/a	n/a	n/a	n/a	High	High	High	High	n/a	n/a
	FALSE	High	[K].NIQDSAAALK.[D]	1xTMTpro [N-Term]; 1xTMTpro [K10]	FALSE	1	2	2	A0A7R8US28	A0A7R8US28 [19373-19382]		0	1638.97	1.314	1.061	0.808	106	80.7	99.9	18.99	6.67	21.49		n/a	n/a	n/a	n/a	High	High	High	High	High	High	High	High	n/a	n/a	n/a	n/a	High	High	High	High	High	High	High	High	n/a	n/a
	FALSE	High	[R].NISGSVSSLDSITQGSSSATDTK.[A]	1xTMTpro [N-Term]; 2xPhospho [S5; S7]; 1xDeamidated [Q14]; 1xTMTpro [K23]	FALSE	1	2	2	A0A7R8US28	A0A7R8US28 [444-466]	A0A7R8US28 2xPhospho [S448; S450]	0	3011.4	2.012	1.494	0.743	148.9	74	99.6	24.19	16.97	29.82		n/a	n/a	n/a	n/a	High	High	High	High	High	High	High	High	n/a	n/a	n/a	n/a	High	High	High	High	High	High	High	High	n/a	n/a
	FALSE	High	[R].TSEQEEPVSSTEVIVEPIEVPDKK.[E]	1xTMTpro [N-Term]; 2xTMTpro [K23; K24]	FALSE	1	2	1	A0A7R8US28	A0A7R8US28 [12493-12516]		1	3581.96	1.076	0.784	0.729	76.2	70.8	97.1	36.28	29.29	20.07		n/a	n/a	n/a	n/a	n/a	n/a	n/a	n/a	High	High	High	High	n/a	n/a	n/a	n/a	n/a	n/a	n/a	n/a	High	High	High	High	n/a	n/a
	FALSE	High	[K].KPEDEPKDTTTSVEVEEQVFDSEPAR.[V]	1xTMTpro [N-Term]; 2xTMTpro [K1; K7]	FALSE	1	2	1	A0A7R8US28	A0A7R8US28 [17794-17819]		1	3875	1.416	1.378	0.973	141.4	99.9	102.6	17.55	15.61	23.56		n/a	n/a	n/a	n/a	n/a	n/a	n/a	n/a	High	High	High	High	n/a	n/a	n/a	n/a	n/a	n/a	n/a	n/a	High	High	High	High	n/a	n/a
	FALSE	High	[K].KPEDEPKDTTTSVEVEEQVFDSEPAR.[V]	1xTMTpro [N-Term]; 2xTMTpro [K1; K7]; 1xDeamidated [Q18]	FALSE	1	2	1	A0A7R8US28	A0A7R8US28 [17794-17819]		1	3875.99										No Quan Values	n/a	n/a	n/a	n/a	High	High	High	High	n/a	n/a	n/a	n/a	n/a	n/a	n/a	n/a	High	High	High	High	n/a	n/a	n/a	n/a	n/a	n/a
	FALSE	High	[R].SLLASLPAELEER.[S]	1xTMTpro [N-Term]	FALSE	1	2	2	A0A7R8US28	A0A7R8US28 [7161-7173]		0	1731.98	0.778	0.657	0.845	67.5	86.8	102.7	19.42	17.83	10.25		n/a	n/a	n/a	n/a	High	High	High	High	High	High	High	High	n/a	n/a	n/a	n/a	High	High	High	High	High	High	High	High	n/a	n/a
	FALSE	High	[K].STSPAGIEAIEK.[E]	1xTMTpro [N-Term]; 1xTMTpro [K12]	FALSE	1	2	2	A0A7R8US28	A0A7R8US28 [3618-3629]		0	1811.04	1.589	1.185	0.745	123.9	77.9	104.6	26.57	20.02	15		n/a	n/a	n/a	n/a	High	High	High	High	High	High	High	High	n/a	n/a	n/a	n/a	High	High	High	High	High	High	High	High	n/a	n/a
	FALSE	High	[R].DLANLEMDFEK.[F]	1xTMTpro [N-Term]; 1xTMTpro [K11]	FALSE	1	2	2	A0A7R8US28	A0A7R8US28 [4057-4067]		0	1933.02	1.093	0.844	0.773	86.9	79.5	102.9	15.93	21.02	13.65		n/a	n/a	n/a	n/a	High	High	High	High	High	High	High	High	n/a	n/a	n/a	n/a	High	High	High	High	High	High	High	High	n/a	n/a
	FALSE	High	[R].FQDLDNDLQQK.[K]	1xTMTpro [N-Term]; 1xTMTpro [K11]	FALSE	1	2	2	A0A7R8US28	A0A7R8US28 [2137-2147]		0	1972.06	1.774	0.896	0.505	91.3	51.5	101.9	30.13	33.49	8.12		n/a	n/a	n/a	n/a	High	High	High	High	High	High	High	High	n/a	n/a	n/a	n/a	High	High	High	High	High	High	High	High	n/a	n/a
	FALSE	High	[R].SALGGQWQEIMR.[L]	1xTMTpro [N-Term]	FALSE	1	2	2	A0A7R8US28	A0A7R8US28 [19116-19127]		0	1679.89	0.983	0.849	0.864	83.9	85.4	98.8	7.87	11.32	14.14		n/a	n/a	n/a	n/a	High	High	High	High	High	High	High	High	n/a	n/a	n/a	n/a	High	High	High	High	High	High	High	High	n/a	n/a
	FALSE	High	[R].IESIQNSIVDSISSQDVPVDDKLNLLER.[E]	1xTMTpro [N-Term]; 1xTMTpro [K22]	FALSE	1	2	3	A0A7R8US28	A0A7R8US28 [18957-18984]		1	3735.03	1.6	0.981	0.613	98	61.2	99.9	26.91	21.03	4.57		n/a	n/a	n/a	n/a	High	High	High	High	High	High	High	High	n/a	n/a	n/a	n/a	High	High	High	High	High	High	High	High	n/a	n/a
	FALSE	High	[R].IESIQNSIVDSISSQDVPVDDKLNLLER.[E]	1xTMTpro [N-Term]; 1xDeamidated [Q15]; 1xTMTpro [K22]	FALSE	1	2	1	A0A7R8US28	A0A7R8US28 [18957-18984]		1	3736.01										No Quan Values	n/a	n/a	n/a	n/a	High	High	High	High	n/a	n/a	n/a	n/a	n/a	n/a	n/a	n/a	High	High	High	High	n/a	n/a	n/a	n/a	n/a	n/a
	FALSE	High	[K].EPEVITDTPATLQTEQPDIENK.[F]	1xTMTpro [N-Term]; 1xTMTpro [K22]	FALSE	1	2	1	A0A7R8US28	A0A7R8US28 [16844-16865]		0	3076.62	1.158	1.388	1.199	135.8	117.3	97.8	9.41	38.51	26.21		n/a	n/a	n/a	n/a	n/a	n/a	n/a	n/a	High	High	High	High	n/a	n/a	n/a	n/a	n/a	n/a	n/a	n/a	High	High	High	High	n/a	n/a
	FALSE	High	[R].TEYLTAVDEIR.[T]	1xTMTpro [N-Term]	FALSE	1	2	1	A0A7R8US28	A0A7R8US28 [7617-7627]		0	1613.87	0.841	0.722	0.859	67.6	80.4	93.6	26.7	21.7	21.11		n/a	n/a	n/a	n/a	n/a	n/a	n/a	n/a	High	High	High	High	n/a	n/a	n/a	n/a	n/a	n/a	n/a	n/a	High	High	High	High	n/a	n/a
	FALSE	High	[K].DIWPVNQDIGSSFDLK.[I]	1xTMTpro [N-Term]; 1xDeamidated [Q7]; 1xTMTpro [K16]	FALSE	1	2	1	A0A7R8US28	A0A7R8US28 [17889-17904]		0	2443.3										No Quan Values	n/a	n/a	n/a	n/a	n/a	n/a	n/a	n/a	High	High	High	High	n/a	n/a	n/a	n/a	n/a	n/a	n/a	n/a	High	High	High	High	n/a	n/a
	FALSE	High	[K].EEVPLSESK.[V]	1xTMTpro [N-Term]; 1xTMTpro [K9]	FALSE	1	2	1	A0A7R8US28	A0A7R8US28 [12893-12901]		0	1625.92	1.002	1.05	1.048	111.6	111.3	106.2	12.37	15.2	20.31		High	High	High	High	n/a	n/a	n/a	n/a	n/a	n/a	n/a	n/a	High	High	High	High	n/a	n/a	n/a	n/a	n/a	n/a	n/a	n/a	High	High
	FALSE	High	[K].ELEIDNVTEK.[V]	1xTMTpro [N-Term]; 1xTMTpro [K10]	FALSE	1	2	6	A0A7R8US28	A0A7R8US28 [4566-4575]		0	1798.01	1.656	1.334	0.805	137.5	83	103.1	21.72	25.49	19.91		High	High	High	High	High	High	High	High	High	High	High	High	High	High	High	High	High	High	High	High	High	High	High	High	High	High
	FALSE	High	[R].VDDLINDLR.[D]	1xTMTpro [N-Term]	FALSE	1	2	3	A0A7R8US28	A0A7R8US28 [346-354]		0	1376.77	1.532	0.893	0.583	85.3	55.7	95.5	25.54	18.39	22.31		High	High	High	High	High	High	High	High	High	High	High	High	High	High	High	High	High	High	High	High	High	High	High	High	High	High
	FALSE	High	[K].QAYQEIQDWFR.[K]	1xGln->pyro-Glu [N-Term]	FALSE	1	2	3	A0A7R8US28	A0A7R8US28 [5704-5714]		0	1466.67										No Quan Labels	High	High	High	High	High	High	High	High	High	High	High	High	High	High	High	High	High	High	High	High	High	High	High	High	High	High
	FALSE	High	[K].ESDLPQIPDQK.[V]	1xTMTpro [N-Term]; 1xTMTpro [K11]	FALSE	1	2	2	A0A7R8US28	A0A7R8US28 [16503-16513]		0	1878.05	1.108	1.531	1.382	149.9	135.3	97.9	21.33	20.31	26.21		High	High	High	High	n/a	n/a	n/a	n/a	High	High	High	High	High	High	High	High	n/a	n/a	n/a	n/a	High	High	High	High	High	High
	FALSE	High	[K].QVTVEVPTAGK.[I]	1xTMTpro [N-Term]; 1xTMTpro [K11]	FALSE	1	2	2	A0A7R8US28	A0A7R8US28 [9385-9395]		0	1737.04	0.894	0.875	0.98	87.7	98.1	100.2	18.74	25.01	22.89		High	High	High	High	n/a	n/a	n/a	n/a	High	High	High	High	High	High	High	High	n/a	n/a	n/a	n/a	High	High	High	High	High	High
	FALSE	High	[K].AVDELQQQLK.[G]	1xTMTpro [N-Term]; 1xTMTpro [K10]	FALSE	1	2	3	A0A7R8US28	A0A7R8US28 [6586-6595]		0	1780.05	1.246	1.007	0.808	99.8	80.1	99.2	17.93	15.3	13.64		High	High	High	High	High	High	High	High	High	High	High	High	High	High	High	High	High	High	High	High	High	High	High	High	High	High
	FALSE	High	[R].ELTPGQTVTPTK.[E]	1xTMTpro [N-Term]; 1xDeamidated [Q6]; 1xTMTpro [K12]	FALSE	1	2	2	A0A7R8US28	A0A7R8US28 [11343-11354]		0	1881.08	1.41	1.329	0.942	140.4	99.5	105.6	13.61	19.51	19		High	High	High	High	n/a	n/a	n/a	n/a	High	High	High	High	High	High	High	High	n/a	n/a	n/a	n/a	High	High	High	High	High	High
	FALSE	High	[K].DLLNQWNDFEK.[S]	1xTMTpro [N-Term]; 1xTMTpro [K11]	FALSE	1	2	2	A0A7R8US28	A0A7R8US28 [3654-3664]		0	2030.08	1.678	0.946	0.564	92	54.8	97.2	27.4	35.41	8.29		n/a	n/a	n/a	n/a	High	High	High	High	High	High	High	High	n/a	n/a	n/a	n/a	High	High	High	High	High	High	High	High	n/a	n/a
	FALSE	High	[K].NLSDQSDFLQYK.[A]	1xTMTpro [N-Term]; 1xTMTpro [K12]	FALSE	1	2	1	A0A7R8US28	A0A7R8US28 [5907-5918]		0	2066.1	1.083	0.837	0.773	83.8	77.4	100.1	20.59	15.93	2.69		n/a	n/a	n/a	n/a	High	High	High	High	n/a	n/a	n/a	n/a	n/a	n/a	n/a	n/a	High	High	High	High	n/a	n/a	n/a	n/a	n/a	n/a
	FALSE	High	[R].ILDELSAYIK.[I]	1xTMTpro [N-Term]; 1xTMTpro [K10]	FALSE	1	2	1	A0A7R8US28	A0A7R8US28 [7908-7917]		0	1773.07										No Quan Values	High	High	High	High	n/a	n/a	n/a	n/a	n/a	n/a	n/a	n/a	High	High	High	High	n/a	n/a	n/a	n/a	n/a	n/a	n/a	n/a	High	High
	FALSE	High	[K].AEADVETK.[K]	1xTMTpro [N-Term]; 1xTMTpro [K8]	FALSE	1	2	2	A0A7R8US28	A0A7R8US28 [14841-14848]		0	1470.83	0.769	1.2	1.561	116.9	152	97.4	24.31	25.62	12.72		n/a	n/a	n/a	n/a	High	High	High	High	High	High	High	High	n/a	n/a	n/a	n/a	High	High	High	High	High	High	High	High	n/a	n/a
	FALSE	High	[R].DLQNEWER.[I]	1xTMTpro [N-Term]	FALSE	1	2	4	A0A7R8US28	A0A7R8US28 [5137-5144]		0	1393.7	1.178	0.96	0.814	97.3	82.6	101.4	5.99	12.44	15.8		High	High	High	High	High	High	High	High	High	High	High	High	High	High	High	High	High	High	High	High	High	High	High	High	High	High
	FALSE	High	[K].EQEAEQTK.[L]	1xTMTpro [N-Term]; 1xTMTpro [K8]	FALSE	1	2	3	A0A7R8US28	A0A7R8US28 [15538-15545]		0	1570.86	2.461	1.244	0.506	128.4	52.2	103.2	45.85	44.48	11.47		High	High	High	High	High	High	High	High	High	High	High	High	High	High	High	High	High	High	High	High	High	High	High	High	High	High
	FALSE	High	[R].QNETEFEK.[L]	1xTMTpro [N-Term]; 1xTMTpro [K8]	FALSE	1	2	6	A0A7R8US28	A0A7R8US28 [4135-4142]		0	1632.87	0.851	0.938	1.102	92.7	108.9	98.8	13.94	11.27	14.97		High	High	High	High	High	High	High	High	High	High	High	High	High	High	High	High	High	High	High	High	High	High	High	High	High	High
	FALSE	High	[K].NTIEEQLK.[N]	1xTMTpro [N-Term]; 1xTMTpro [K8]	FALSE	1	2	3	A0A7R8US28	A0A7R8US28 [6197-6204]		0	1582.93	0.799	1.048	1.311	105.1	131.5	100.3	14.99	23.3	15.73		High	High	High	High	High	High	High	High	High	High	High	High	High	High	High	High	High	High	High	High	High	High	High	High	High	High
	FALSE	High	[K].NFIETTQK.[T]	1xTMTpro [N-Term]; 1xTMTpro [K8]	FALSE	1	2	3	A0A7R8US28	A0A7R8US28 [7564-7571]		0	1588.92	0.568	0.854	1.505	80.5	141.8	94.3	16.32	26.82	17.89		High	High	High	High	High	High	High	High	n/a	n/a	n/a	n/a	High	High	High	High	High	High	High	High	n/a	n/a	n/a	n/a	High	High
	FALSE	High	[K].VISEVQELPK.[T]	1xTMTpro [N-Term]; 1xTMTpro [K10]	FALSE	1	2	3	A0A7R8US28	A0A7R8US28 [10785-10794]		0	1750.06	1.404	1.036	0.738	105.4	75.1	101.7	10.83	12.41	8.37		High	High	High	High	High	High	High	High	High	High	High	High	High	High	High	High	High	High	High	High	High	High	High	High	High	High
	FALSE	High	[K].WSGLDEIAEK.[L]	1xTMTpro [N-Term]; 1xTMTpro [K10]	FALSE	1	2	1	A0A7R8US28	A0A7R8US28 [4302-4311]		0	1755.98	1.164	0.916	0.786	89.8	77.1	98.1	12.6	10.87	7.08		High	High	High	High	n/a	n/a	n/a	n/a	n/a	n/a	n/a	n/a	High	High	High	High	n/a	n/a	n/a	n/a	n/a	n/a	n/a	n/a	High	High
	FALSE	High	[K].EEIIIPQDSLLPITK.[G]	1xTMTpro [N-Term]; 1xTMTpro [K15]	FALSE	1	2	1	A0A7R8US28	A0A7R8US28 [14030-14044]		0	2317.39	1.381	1.052	0.762	101.2	73.3	96.2	17.59	34.42	12.72		n/a	n/a	n/a	n/a	High	High	High	High	n/a	n/a	n/a	n/a	n/a	n/a	n/a	n/a	High	High	High	High	n/a	n/a	n/a	n/a	n/a	n/a
	FALSE	High	[R].SGIGGDAR.[L]	1xTMTpro [N-Term]	FALSE	1	2	3	A0A7R8US28	A0A7R8US28 [7890-7897]		0	1036.57	1.573	1.019	0.648	101.3	64.4	99.4	29.79	33.8	5.27		High	High	High	High	High	High	High	High	High	High	High	High	High	High	High	High	High	High	High	High	High	High	High	High	High	High
	FALSE	High	[R].TLQQIPAK.[W]	1xTMTpro [N-Term]; 1xTMTpro [K8]	FALSE	1	2	2	A0A7R8US28	A0A7R8US28 [1397-1404]		0	1506.95	0.999	0.88	0.881	86	86.1	97.7	12.22	12.07	9.2		High	High	High	High	n/a	n/a	n/a	n/a	High	High	High	High	High	High	High	High	n/a	n/a	n/a	n/a	High	High	High	High	High	High
	FALSE	High	[K].DFVEWLEK.[A]	1xTMTpro [N-Term]; 1xTMTpro [K8]	FALSE	1	2	2	A0A7R8US28	A0A7R8US28 [901-908]		0	1673.94	0.939	1.321	1.406	130.1	138.5	98.5	6.59	22.39	10.6		n/a	n/a	n/a	n/a	High	High	High	High	High	High	High	High	n/a	n/a	n/a	n/a	High	High	High	High	High	High	High	High	n/a	n/a
	FALSE	High	[K].VNLLPNLPEK.[Q]	1xTMTpro [N-Term]; 1xTMTpro [K10]	FALSE	1	2	4	A0A7R8US28	A0A7R8US28 [4971-4980]		0	1745.08	1.419	1.014	0.715	101.1	71.3	99.7	20.47	21.27	7.55		High	High	High	High	High	High	High	High	High	High	High	High	High	High	High	High	High	High	High	High	High	High	High	High	High	High
	FALSE	High	[K].EGNMAEAK.[R]	1xTMTpro [N-Term]; 1xTMTpro [K8]	FALSE	1	2	1	A0A7R8US28	A0A7R8US28 [1796-1803]		0	1457.79	1.857	0.951	0.512	97.5	52.5	102.6	43.07	46.84	12.54		n/a	n/a	n/a	n/a	n/a	n/a	n/a	n/a	High	High	High	High	n/a	n/a	n/a	n/a	n/a	n/a	n/a	n/a	High	High	High	High	n/a	n/a
	FALSE	High	[R].ELSPEELEPLEEFMK.[E]	1xTMTpro [N-Term]; 1xTMTpro [K15]	FALSE	1	2	2	A0A7R8US28	A0A7R8US28 [8940-8954]		0	2428.28	0.729	0.866	1.187	85.8	117.6	99.1	20.34	21	17.34		High	High	High	High	High	High	High	High	n/a	n/a	n/a	n/a	High	High	High	High	High	High	High	High	n/a	n/a	n/a	n/a	High	High
	FALSE	High	[R].NVSTDLIK.[K]	1xTMTpro [N-Term]; 1xTMTpro [K8]	FALSE	1	2	1	A0A7R8US28	A0A7R8US28 [1652-1659]		0	1497.91	1.549	0.74	0.478	71.7	46.3	96.8	31.95	27.28	12.6		High	High	High	High	n/a	n/a	n/a	n/a	n/a	n/a	n/a	n/a	High	High	High	High	n/a	n/a	n/a	n/a	n/a	n/a	n/a	n/a	High	High
	FALSE	High	[R].QQTLEQIK.[Q]	1xTMTpro [N-Term]; 1xTMTpro [K8]	FALSE	1	2	1	A0A7R8US28	A0A7R8US28 [6152-6159]		0	1595.96	1.051	0.96	0.913	93.5	88.9	97.4	3.15	9.81	7.76		High	High	High	High	n/a	n/a	n/a	n/a	n/a	n/a	n/a	n/a	High	High	High	High	n/a	n/a	n/a	n/a	n/a	n/a	n/a	n/a	High	High
	FALSE	High	[K].VQEDTDTLK.[Q]	1xTMTpro [N-Term]; 1xTMTpro [K9]	FALSE	1	2	1	A0A7R8US28	A0A7R8US28 [5566-5574]		0	1656.93	0.999	1.246	1.247	124.6	124.7	100	5.45	15.63	14.21		n/a	n/a	n/a	n/a	n/a	n/a	n/a	n/a	High	High	High	High	n/a	n/a	n/a	n/a	n/a	n/a	n/a	n/a	High	High	High	High	n/a	n/a
	FALSE	High	[K].EIEAHLK.[K]	1xTMTpro [N-Term]; 1xTMTpro [K7]	FALSE	1	2	1	A0A7R8US28	A0A7R8US28 [7129-7135]		0	1447.88										No Quan Values	n/a	n/a	n/a	n/a	n/a	n/a	n/a	n/a	High	High	High	High	n/a	n/a	n/a	n/a	n/a	n/a	n/a	n/a	High	High	High	High	n/a	n/a
	FALSE	High	[R].LSAIQAIK.[N]	1xTMTpro [N-Term]; 1xTMTpro [K8]	FALSE	1	2	3	A0A7R8US28	A0A7R8US28 [6481-6488]		0	1451.94	1.168	0.837	0.717	80.7	69.1	96.4	21.07	23.63	16.52		High	High	High	High	High	High	High	High	High	High	High	High	High	High	High	High	High	High	High	High	High	High	High	High	High	High
	FALSE	High	[K].LQQAEEAK.[V]	1xTMTpro [N-Term]; 1xDeamidated [Q3]; 1xTMTpro [K8]	FALSE	1	2	1	A0A7R8US28	A0A7R8US28 [7797-7804]		0	1525.87	2.137	1.755	0.821	164.2	76.9	93.6	26.26	26.92	33.1		High	High	High	High	n/a	n/a	n/a	n/a	n/a	n/a	n/a	n/a	High	High	High	High	n/a	n/a	n/a	n/a	n/a	n/a	n/a	n/a	High	High
	FALSE	High	[K].VDEPDLSAPIR.[R]	1xTMTpro [N-Term]	FALSE	1	2	2	A0A7R8US28	A0A7R8US28 [8854-8864]		0	1515.83	1.738	1.181	0.68	121.4	69.8	102.8	27.64	23.08	12.59		High	High	High	High	High	High	High	High	n/a	n/a	n/a	n/a	High	High	High	High	High	High	High	High	n/a	n/a	n/a	n/a	High	High
	FALSE	High	[K].TPDVSPLEK.[A]	1xTMTpro [N-Term]; 1xTMTpro [K9]	FALSE	1	2	2	A0A7R8US28	A0A7R8US28 [11436-11444]		0	1593.93	0.756	1.033	1.366	106.6	141	103.2	9.81	22.45	22		High	High	High	High	n/a	n/a	n/a	n/a	High	High	High	High	High	High	High	High	n/a	n/a	n/a	n/a	High	High	High	High	High	High
	FALSE	High	[R].AIDDMNER.[R]	1xTMTpro [N-Term]	FALSE	1	2	1	A0A7R8US28	A0A7R8US28 [2253-2260]		0	1267.63	0.851	1.269	1.491	119.5	140.4	94.2	17.12	28.78	19.16		n/a	n/a	n/a	n/a	n/a	n/a	n/a	n/a	High	High	High	High	n/a	n/a	n/a	n/a	n/a	n/a	n/a	n/a	High	High	High	High	n/a	n/a
	FALSE	High	[R].EEDLPEAK.[K]	1xTMTpro [N-Term]; 1xTMTpro [K8]	FALSE	1	2	1	A0A7R8US28	A0A7R8US28 [12309-12316]		0	1538.86	1.104	1.065	0.965	100.9	91.4	94.7	22.51	33.34	20.3		High	High	High	High	n/a	n/a	n/a	n/a	n/a	n/a	n/a	n/a	High	High	High	High	n/a	n/a	n/a	n/a	n/a	n/a	n/a	n/a	High	High
	FALSE	High	[K].AMDTVPTDK.[Q]	1xTMTpro [N-Term]; 1xTMTpro [K9]	FALSE	1	2	3	A0A7R8US28	A0A7R8US28 [5975-5983]		0	1585.88	0.989	1.177	1.191	119.7	121.1	101.7	7	3.48	17.38		High	High	High	High	High	High	High	High	High	High	High	High	High	High	High	High	High	High	High	High	High	High	High	High	High	High
	FALSE	High	[K].VHLDDIDR.[K]	1xTMTpro [N-Term]	FALSE	1	2	4	A0A7R8US28	A0A7R8US28 [2422-2429]		0	1286.7	0.763	1.052	1.379	97.6	127.9	92.7	30.39	34.66	28.08		High	High	High	High	High	High	High	High	High	High	High	High	High	High	High	High	High	High	High	High	High	High	High	High	High	High
	FALSE	High	[K].LGPVEEQLK.[S]	1xTMTpro [N-Term]; 1xTMTpro [K9]	FALSE	1	2	1	A0A7R8US28	A0A7R8US28 [4371-4379]		0	1620.98	1.271	0.943	0.742	97.4	76.7	103.4	16.18	17.32	14.88		High	High	High	High	n/a	n/a	n/a	n/a	n/a	n/a	n/a	n/a	High	High	High	High	n/a	n/a	n/a	n/a	n/a	n/a	n/a	n/a	High	High
	FALSE	High	[K].AQELHNK.[L]	1xTMTpro [N-Term]; 1xTMTpro [K7]	FALSE	1	2	1	A0A7R8US28	A0A7R8US28 [6273-6279]		0	1447.85	1.036	1.022	0.986	100.9	97.4	98.7	9.92	8.43	10.61		High	High	High	High	n/a	n/a	n/a	n/a	n/a	n/a	n/a	n/a	High	High	High	High	n/a	n/a	n/a	n/a	n/a	n/a	n/a	n/a	High	High
	FALSE	High	[K].VSEECAK.[I]	1xTMTpro [N-Term]; 1xCarbamidomethyl [C5]; 1xTMTpro [K7]	FALSE	1	2	1	A0A7R8US28	A0A7R8US28 [3959-3965]		0	1430.78	1.085	1.161	1.07	119.4	110	102.8	55.02	42.57	47.66		n/a	n/a	n/a	n/a	High	High	High	High	n/a	n/a	n/a	n/a	n/a	n/a	n/a	n/a	High	High	High	High	n/a	n/a	n/a	n/a	n/a	n/a
	FALSE	High	[K].FTIALNDLK.[N]	1xTMTpro [N-Term]; 1xTMTpro [K9]	FALSE	1	2	1	A0A7R8US28	A0A7R8US28 [4068-4076]		0	1643										No Quan Values	n/a	n/a	n/a	n/a	n/a	n/a	n/a	n/a	High	High	High	High	n/a	n/a	n/a	n/a	n/a	n/a	n/a	n/a	High	High	High	High	n/a	n/a
	FALSE	High	[K].LQDSLAQK.[K]	1xTMTpro [N-Term]; 1xTMTpro [K8]	FALSE	1	2	1	A0A7R8US28	A0A7R8US28 [5410-5417]		0	1510.91	1.121	0.983	0.877	95.9	85.6	97.6	7.16	15.64	7.81		n/a	n/a	n/a	n/a	High	High	High	High	n/a	n/a	n/a	n/a	n/a	n/a	n/a	n/a	High	High	High	High	n/a	n/a	n/a	n/a	n/a	n/a
	FALSE	High	[K].FDEEVVK.[F]	1xTMTpro [N-Term]; 1xTMTpro [K7]	FALSE	1	2	1	A0A7R8US28	A0A7R8US28 [6707-6713]		0	1473.84	1.332	1.158	0.869	114	85.6	98.4	9.39	8.44	21.24		n/a	n/a	n/a	n/a	n/a	n/a	n/a	n/a	High	High	High	High	n/a	n/a	n/a	n/a	n/a	n/a	n/a	n/a	High	High	High	High	n/a	n/a
	FALSE	High	[RC].LIEEEIR.[VTA]	1xTMTpro [N-Term]	FALSE	1	2	1	A0A7R8US28	A0A7R8US28 [13722-13728]; [13931-13937]; [14165-14171]; [14414-14420]; [14642-14648]; [14880-14886]		0	1205.71	2.319	0.791	0.341	69.8	30.1	88.2	47.75	93.01	50.35		n/a	n/a	n/a	n/a	High	High	High	High	n/a	n/a	n/a	n/a	n/a	n/a	n/a	n/a	High	High	High	High	n/a	n/a	n/a	n/a	n/a	n/a
	FALSE	High	[K].GELSEMK.[T]	1xTMTpro [N-Term]; 1xTMTpro [K7]	FALSE	1	2	1	A0A7R8US28	A0A7R8US28 [6048-6054]		0	1401.79	0.817	1.259	1.541	132.8	162.5	105.5	26.02	25.14	12.46		n/a	n/a	n/a	n/a	n/a	n/a	n/a	n/a	High	High	High	High	n/a	n/a	n/a	n/a	n/a	n/a	n/a	n/a	High	High	High	High	n/a	n/a
	FALSE	High	[K].NLENVTK.[D]	1xTMTpro [N-Term]; 1xTMTpro [K7]	FALSE	1	2	2	A0A7R8US28	A0A7R8US28 [3784-3790]		0	1425.86	1.15	0.976	0.849	102.8	89.4	105.3	24.92	15.29	19.86		n/a	n/a	n/a	n/a	High	High	High	High	High	High	High	High	n/a	n/a	n/a	n/a	High	High	High	High	High	High	High	High	n/a	n/a
	FALSE	High	[K].AFPSEPANK.[M]	1xTMTpro [N-Term]; 1xTMTpro [K9]	FALSE	1	2	2	A0A7R8US28	A0A7R8US28 [1168-1176]		0	1568.89	0.871	1.013	1.164	108.3	124.4	106.8	25.63	17.96	16.05		n/a	n/a	n/a	n/a	High	High	High	High	High	High	High	High	n/a	n/a	n/a	n/a	High	High	High	High	High	High	High	High	n/a	n/a
	FALSE	High	[K].EVTELEK.[V]	1xTMTpro [N-Term]; 1xTMTpro [K7]	FALSE	1	2	3	A0A7R8US28	A0A7R8US28 [1700-1706]		0	1455.86	1.362	0.84	0.616	92.8	68.1	110.5	37.91	29.26	24.04		High	High	High	High	High	High	High	High	High	High	High	High	High	High	High	High	High	High	High	High	High	High	High	High	High	High
	FALSE	High	[K].AQQDYQK.[N]	1xTMTpro [N-Term]; 1xTMTpro [K7]	FALSE	1	2	2	A0A7R8US28	A0A7R8US28 [3986-3992]		0	1488.83	1.346	1.178	0.875	120.7	89.6	102.5	11.01	17.37	9.98		High	High	High	High	n/a	n/a	n/a	n/a	High	High	High	High	High	High	High	High	n/a	n/a	n/a	n/a	High	High	High	High	High	High
	FALSE	High	[K].QNLTETLEK.[R]	1xGln->pyro-Glu [N-Term]; 1xTMTpro [K9]	FALSE	1	2	3	A0A7R8US28	A0A7R8US28 [6605-6613]		0	1362.74	0.996	1.093	1.097	114.9	115.3	105.1	20.13	13.28	15.82		High	High	High	High	High	High	High	High	High	High	High	High	High	High	High	High	High	High	High	High	High	High	High	High	High	High
	FALSE	High	[K].IQEAADK.[I]	1xTMTpro [N-Term]; 1xTMTpro [K7]	FALSE	1	2	1	A0A7R8US28	A0A7R8US28 [7242-7248]		0	1382.81	0.738	1.034	1.4	103.9	140.7	100.5	32.57	30.78	21.29		n/a	n/a	n/a	n/a	n/a	n/a	n/a	n/a	High	High	High	High	n/a	n/a	n/a	n/a	n/a	n/a	n/a	n/a	High	High	High	High	n/a	n/a
FALSE	High	Master Protein	A0A7R8V9P1	Apolipophorin OS=Hermetia illucens OX=343691 GN=HERILL_LOCUS16349 PE=3 SV=1	0	735.084	30	111	777	111	3634	405.5	8.6	19343	111	0	0.873	0.818	0.936	0.458988	0.402088	0.993098	85.8	98.2	104.9	4.54	23.69	11.92	High	High	High	1
	Checked	Confidence	Annotated Sequence	Modifications	Contaminant	# Protein Groups	# Proteins	# PSMs	Master Protein Accessions	Positions in Master Proteins	Modifications in Master Proteins	# Missed Cleavages	Theo. MH+ [Da]	Abundance Ratio: (10 mM FAC) / (100 mM FAC)	Abundance Ratio: (10 mM FAC) / (CNTRL)	Abundance Ratio: (100 mM FAC) / (CNTRL)	Abundances (Grouped): 10 mM FAC	Abundances (Grouped): 100 mM FAC	Abundances (Grouped): CNTRL	Abundances (Grouped) CV [%]: 10 mM FAC	Abundances (Grouped) CV [%]: 100 mM FAC	Abundances (Grouped) CV [%]: CNTRL	Quan Info	Found in Sample: F1: 128C, Sample, 5, 10 mM FAC	Found in Sample: F1: 129N, Sample, 6, 10 mM FAC	Found in Sample: F1: 129C, Sample, 7, 10 mM FAC	Found in Sample: F1: 130N, Sample, 8, 10 mM FAC	Found in Sample: F2: 128C, Sample, 5, 10 mM FAC	Found in Sample: F2: 129N, Sample, 6, 10 mM FAC	Found in Sample: F2: 129C, Sample, 7, 10 mM FAC	Found in Sample: F2: 130N, Sample, 8, 10 mM FAC	Found in Sample: F3: 128C, Sample, 5, 10 mM FAC	Found in Sample: F3: 129N, Sample, 6, 10 mM FAC	Found in Sample: F3: 129C, Sample, 7, 10 mM FAC	Found in Sample: F3: 130N, Sample, 8, 10 mM FAC	Found in Sample: F1: 130C, Sample, 9, 100 mM FAC	Found in Sample: F1: 131N, Sample, 10, 100 mM FAC	Found in Sample: F1: 131C, Sample, 11, 100 mM FAC	Found in Sample: F1: 132N, Sample, 12, 100 mM FAC	Found in Sample: F2: 130C, Sample, 9, 100 mM FAC	Found in Sample: F2: 131N, Sample, 10, 100 mM FAC	Found in Sample: F2: 131C, Sample, 11, 100 mM FAC	Found in Sample: F2: 132N, Sample, 12, 100 mM FAC	Found in Sample: F3: 130C, Sample, 9, 100 mM FAC	Found in Sample: F3: 131N, Sample, 10, 100 mM FAC	Found in Sample: F3: 131C, Sample, 11, 100 mM FAC	Found in Sample: F3: 132N, Sample, 12, 100 mM FAC	Found in Sample: F1: 126, Control, 1, CNTRL	Found in Sample: F1: 127N, Control, 2, CNTRL
	FALSE	High	[R].LRNGLVAEER.[C]	1xTMTpro [N-Term]; 1xDeamidated [N3]	FALSE	1	1	1	A0A7R8V9P1	A0A7R8V9P1 [3605-3614]		1	1461.83	0.826	0.583	0.706	59.2	71.7	101.5	25.42	38.06	20.83		n/a	n/a	n/a	n/a	n/a	n/a	n/a	n/a	High	High	High	High	n/a	n/a	n/a	n/a	n/a	n/a	n/a	n/a	High	High	High	High	n/a	n/a
	FALSE	High	[K].IDLQEQLGDR.[K]	1xTMTpro [N-Term]	FALSE	1	1	9	A0A7R8V9P1	A0A7R8V9P1 [2020-2029]		0	1490.81	0.86	1.092	1.269	98.6	114.6	90.3	23.25	41.87	31.76		High	High	High	High	High	High	High	High	High	High	High	High	High	High	High	High	High	High	High	High	High	High	High	High	High	High
	FALSE	High	[R].TELTNECECR.[L]	1xTMTpro [N-Term]; 2xCarbamidomethyl [C7; C9]	FALSE	1	1	8	A0A7R8V9P1	A0A7R8V9P1 [3595-3604]		0	1615.74	0.897	0.877	0.978	88.1	98.2	100.4	12.7	33.58	26.48		High	High	High	High	High	High	High	High	High	High	High	High	High	High	High	High	High	High	High	High	High	High	High	High	High	High
	FALSE	High	[R].ANPPASGSFK.[W]	1xTMTpro [N-Term]; 1xTMTpro [K10]	FALSE	1	1	7	A0A7R8V9P1	A0A7R8V9P1 [1491-1500]		0	1583.9	0.748	0.847	1.132	93.3	124.7	110.2	22.25	32.91	23.41		High	High	High	High	High	High	High	High	High	High	High	High	High	High	High	High	High	High	High	High	High	High	High	High	High	High
	FALSE	High	[K].EIIDEISSDTSLR.[N]	1xTMTpro [N-Term]	FALSE	1	1	19	A0A7R8V9P1	A0A7R8V9P1 [2769-2781]		0	1781.95	0.899	0.954	1.061	95.4	106.2	100	29.34	47.86	24.32		High	High	High	High	High	High	High	High	High	High	High	High	High	High	High	High	High	High	High	High	High	High	High	High	High	High
	FALSE	High	[K].ETVHIPIGGR.[R]	1xTMTpro [N-Term]	FALSE	1	1	11	A0A7R8V9P1	A0A7R8V9P1 [1225-1234]		0	1382.81	1.193	0.89	0.746	90.4	75.8	101.6	7.54	14.13	6.41		High	High	High	High	High	High	High	High	High	High	High	High	High	High	High	High	High	High	High	High	High	High	High	High	High	High
	FALSE	High	[K].QEDNIVNILK.[G]	1xTMTpro [N-Term]; 1xTMTpro [K10]	FALSE	1	1	8	A0A7R8V9P1	A0A7R8V9P1 [784-793]		0	1794.06	1.063	0.759	0.714	78.1	73.5	102.9	13.91	23.44	10.99		High	High	High	High	High	High	High	High	High	High	High	High	High	High	High	High	High	High	High	High	High	High	High	High	High	High
	FALSE	High	[K].FYGSVEQLGDR.[K]	1xTMTpro [N-Term]	FALSE	1	1	4	A0A7R8V9P1	A0A7R8V9P1 [2174-2184]		0	1574.81	0.792	0.728	0.919	70.8	89.3	97.1	35.94	34.37	24.3		High	High	High	High	High	High	High	High	High	High	High	High	High	High	High	High	High	High	High	High	High	High	High	High	High	High
	FALSE	High	[K].DMLAGHGEAK.[W]	1xTMTpro [N-Term]; 1xTMTpro [K10]	FALSE	1	1	3	A0A7R8V9P1	A0A7R8V9P1 [1720-1729]		0	1636.9	0.851	0.941	1.106	105.1	123.5	111.6	17.25	36.1	27.2		High	High	High	High	High	High	High	High	High	High	High	High	High	High	High	High	High	High	High	High	High	High	High	High	High	High
	FALSE	High	[K].DMLAGHGEAK.[W]	1xTMTpro [N-Term]; 1xOxidation [M2]; 1xTMTpro [K10]	FALSE	1	1	4	A0A7R8V9P1	A0A7R8V9P1 [1720-1729]		0	1652.89	0.929	0.929	1	98.5	106	105.9	18.76	32.47	17.67		High	High	High	High	High	High	High	High	High	High	High	High	High	High	High	High	High	High	High	High	High	High	High	High	High	High
	FALSE	High	[K].IVAQDSQDGGK.[R]	1xTMTpro [N-Term]; 1xTMTpro [K11]	FALSE	1	1	7	A0A7R8V9P1	A0A7R8V9P1 [1408-1418]		0	1725.96	0.855	0.948	1.109	103.6	121.1	109.3	15.04	24.12	23.41		High	High	High	High	High	High	High	High	High	High	High	High	High	High	High	High	High	High	High	High	High	High	High	High	High	High
	FALSE	High	[R].DSTAEGYANAK.[L]	1xTMTpro [N-Term]; 1xTMTpro [K11]	FALSE	1	1	2	A0A7R8V9P1	A0A7R8V9P1 [1850-1860]		0	1734.92	0.817	0.92	1.126	45	55.1	48.9	28.07	30.35	110.62		High	High	High	High	High	High	High	High	n/a	n/a	n/a	n/a	High	High	High	High	High	High	High	High	n/a	n/a	n/a	n/a	High	High
	FALSE	High	[K].IVAQDSQDGGKR.[Y]	1xTMTpro [N-Term]; 1xTMTpro [K11]	FALSE	1	1	3	A0A7R8V9P1	A0A7R8V9P1 [1408-1419]		1	1882.06	0.906	0.882	0.973	88.7	97.9	100.5	22	40.77	24.79		High	High	High	High	High	High	High	High	n/a	n/a	n/a	n/a	High	High	High	High	High	High	High	High	n/a	n/a	n/a	n/a	High	High
	FALSE	High	[R].EVLSNGFVSGLVNER.[A]	1xTMTpro [N-Term]	FALSE	1	1	3	A0A7R8V9P1	A0A7R8V9P1 [511-525]		0	1924.05	1.076	0.785	0.73	78	72.5	99.4	15.91	34.08	9.17		High	High	High	High	High	High	High	High	High	High	High	High	High	High	High	High	High	High	High	High	High	High	High	High	High	High
	FALSE	High	[R].EVLSNGFVSGLVNER.[A]	1xTMTpro [N-Term]; 1xDeamidated [N5]	FALSE	1	1	7	A0A7R8V9P1	A0A7R8V9P1 [511-525]		0	1925.03	1.175	0.64	0.544	66.7	56.7	104.2	17.1	47.55	13.77		High	High	High	High	High	High	High	High	High	High	High	High	High	High	High	High	High	High	High	High	High	High	High	High	High	High
	FALSE	High	[K].IAGAYNDLTDQAK.[N]	1xTMTpro [N-Term]; 1xTMTpro [K13]	FALSE	1	1	6	A0A7R8V9P1	A0A7R8V9P1 [1074-1086]		0	1988.09	1.175	0.835	0.71	83.6	71.1	100.1	14.09	26.52	11.73		High	High	High	High	High	High	High	High	High	High	High	High	High	High	High	High	High	High	High	High	High	High	High	High	High	High
	FALSE	High	[K].IAGAYNDLTDQAK.[N]	1xTMTpro [N-Term]; 1xDeamidated [N6]; 1xTMTpro [K13]	FALSE	1	1	5	A0A7R8V9P1	A0A7R8V9P1 [1074-1086]		0	1989.08	1.108	0.894	0.807	88.6	80	99.2	13.94	26.01	22.41		High	High	High	High	High	High	High	High	High	High	High	High	High	High	High	High	High	High	High	High	High	High	High	High	High	High
	FALSE	High	[K].IAGAYNDLTDQAK.[N]	1xTMTpro [N-Term]; 2xDeamidated [N6; Q11]; 1xTMTpro [K13]	FALSE	1	1	1	A0A7R8V9P1	A0A7R8V9P1 [1074-1086]		0	1990.06										No Quan Values	n/a	n/a	n/a	n/a	High	High	High	High	n/a	n/a	n/a	n/a	n/a	n/a	n/a	n/a	High	High	High	High	n/a	n/a	n/a	n/a	n/a	n/a
	FALSE	High	[K].DSLPDFSALQETYER.[N]	1xTMTpro [N-Term]	FALSE	1	1	3	A0A7R8V9P1	A0A7R8V9P1 [2751-2765]		0	2075.03	1.348	0.772	0.573	66.2	49.1	85.8	22.29	62.91	52.1		High	High	High	High	High	High	High	High	High	High	High	High	High	High	High	High	High	High	High	High	High	High	High	High	High	High
	FALSE	High	[K].DSLPDFSALQETYER.[N]	1xTMTpro [N-Term]; 1xDeamidated [Q10]	FALSE	1	1	2	A0A7R8V9P1	A0A7R8V9P1 [2751-2765]		0	2076.01	3.263	2.312	0.708	213.8	65.5	92.5	29.65	13.47	39.21		High	High	High	High	High	High	High	High	n/a	n/a	n/a	n/a	High	High	High	High	High	High	High	High	n/a	n/a	n/a	n/a	High	High
	FALSE	High	[K].ISQEEVNDFESLK.[T]	1xTMTpro [N-Term]; 1xTMTpro [K13]	FALSE	1	1	12	A0A7R8V9P1	A0A7R8V9P1 [2976-2988]		0	2146.15	0.859	1.059	1.233	106.1	123.5	100.2	10.17	38.79	29.43		High	High	High	High	High	High	High	High	High	High	High	High	High	High	High	High	High	High	High	High	High	High	High	High	High	High
	FALSE	High	[K].ISQEEVNDFESLK.[T]	1xTMTpro [N-Term]; 1xDeamidated [N/Q]; 1xTMTpro [K13]	FALSE	1	1	10	A0A7R8V9P1	A0A7R8V9P1 [2976-2988]		0	2147.14	1.747	2.391	1.369	207.5	118.8	86.8	30.13	28.16	35.45		High	High	High	High	High	High	High	High	High	High	High	High	High	High	High	High	High	High	High	High	High	High	High	High	High	High
	FALSE	High	[K].GDLLDGTIDGNFNLGLPNGR.[Q]	1xTMTpro [N-Term]	FALSE	1	1	8	A0A7R8V9P1	A0A7R8V9P1 [1817-1836]		0	2362.23	0.923	1.008	1.091	99	107.2	98.2	13.89	16.05	12.4		High	High	High	High	High	High	High	High	High	High	High	High	High	High	High	High	High	High	High	High	High	High	High	High	High	High
	FALSE	High	[K].GDLLDGTIDGNFNLGLPNGR.[Q]	1xTMTpro [N-Term]; 1xDeamidated [N18]	FALSE	1	1	35	A0A7R8V9P1	A0A7R8V9P1 [1817-1836]		0	2363.22	0.862	0.821	0.952	80.5	93.3	98	23	24.57	10.21		High	High	High	High	High	High	High	High	High	High	High	High	High	High	High	High	High	High	High	High	High	High	High	High	High	High
	FALSE	High	[K].GDLLDGTIDGNFNLGLPNGR.[Q]	1xTMTpro [N-Term]; 2xDeamidated [N]	FALSE	1	1	15	A0A7R8V9P1	A0A7R8V9P1 [1817-1836]		0	2364.2	1.038	0.998	0.962	100.4	96.7	100.5	16.88	20.56	8.51		High	High	High	High	High	High	High	High	High	High	High	High	High	High	High	High	High	High	High	High	High	High	High	High	High	High
	FALSE	High	[K].GDLLDGTIDGNFNLGLPNGR.[Q]	1xTMTpro [N-Term]; 3xDeamidated [N11; N13; N18]	FALSE	1	1	1	A0A7R8V9P1	A0A7R8V9P1 [1817-1836]		0	2365.18										No Quan Values	n/a	n/a	n/a	n/a	High	High	High	High	n/a	n/a	n/a	n/a	n/a	n/a	n/a	n/a	High	High	High	High	n/a	n/a	n/a	n/a	n/a	n/a
	FALSE	High	[K].QAEDAKDSLPDFSALQETYER.[N]	1xGln->pyro-Glu [N-Term]; 1xTMTpro [K6]; 1xDeamidated [Q16]	FALSE	1	1	2	A0A7R8V9P1	A0A7R8V9P1 [2745-2765]		1	2701.28	1.468	1.579	1.075	152.5	103.8	96.6	18.19	20.4	31.63		High	High	High	High	n/a	n/a	n/a	n/a	High	High	High	High	High	High	High	High	n/a	n/a	n/a	n/a	High	High	High	High	High	High
	FALSE	High	[K].QAEDAKDSLPDFSALQETYER.[N]	1xTMTpro [N-Term]; 1xTMTpro [K6]	FALSE	1	1	2	A0A7R8V9P1	A0A7R8V9P1 [2745-2765]		1	3021.53	2.4	0.928	0.387	75.2	31.3	81	43.24	99.05	64.27		High	High	High	High	n/a	n/a	n/a	n/a	High	High	High	High	High	High	High	High	n/a	n/a	n/a	n/a	High	High	High	High	High	High
	FALSE	High	[K].QAEDAKDSLPDFSALQETYER.[N]	1xTMTpro [N-Term]; 1xTMTpro [K6]; 1xDeamidated [Q16]	FALSE	1	1	3	A0A7R8V9P1	A0A7R8V9P1 [2745-2765]		1	3022.51	3.781	2.239	0.592	213	56.3	95.1	37.7	22.04	47.96		High	High	High	High	High	High	High	High	High	High	High	High	High	High	High	High	High	High	High	High	High	High	High	High	High	High
	FALSE	High	[R].GLLGNGNNEPYDDFTLPNGK.[I]	1xTMTpro [N-Term]; 1xTMTpro [K20]	FALSE	1	1	4	A0A7R8V9P1	A0A7R8V9P1 [3193-3212]		0	2743.42	1.062	1.187	1.118	116.2	109.5	97.9	5.99	12.84	16.04		High	High	High	High	High	High	High	High	High	High	High	High	High	High	High	High	High	High	High	High	High	High	High	High	High	High
	FALSE	High	[R].GLLGNGNNEPYDDFTLPNGK.[I]	1xTMTpro [N-Term]; 1xDeamidated [N]; 1xTMTpro [K20]	FALSE	1	1	18	A0A7R8V9P1	A0A7R8V9P1 [3193-3212]		0	2744.4	0.986	0.956	0.97	101.9	103.4	106.6	13.7	18.9	25.9		High	High	High	High	High	High	High	High	High	High	High	High	High	High	High	High	High	High	High	High	High	High	High	High	High	High
	FALSE	High	[R].GLLGNGNNEPYDDFTLPNGK.[I]	1xTMTpro [N-Term]; 2xDeamidated [N]; 1xTMTpro [K20]	FALSE	1	1	39	A0A7R8V9P1	A0A7R8V9P1 [3193-3212]		0	2745.39	0.965	0.912	0.945	97.1	100.6	106.5	15.5	21.02	23.44		High	High	High	High	High	High	High	High	High	High	High	High	High	High	High	High	High	High	High	High	High	High	High	High	High	High
	FALSE	High	[R].GLLGNGNNEPYDDFTLPNGK.[I]	1xTMTpro [N-Term]; 3xDeamidated [N18; N]; 1xTMTpro [K20]	FALSE	1	1	19	A0A7R8V9P1	A0A7R8V9P1 [3193-3212]		0	2746.37	0.96	0.908	0.946	97.2	101.2	107	19.31	25.23	20.67		High	High	High	High	High	High	High	High	High	High	High	High	High	High	High	High	High	High	High	High	High	High	High	High	High	High
	FALSE	High	[K].MESSGHLLQPEAEDGIYDAK.[I]	1xTMTpro [N-Term]; 1xTMTpro [K20]	FALSE	1	1	2	A0A7R8V9P1	A0A7R8V9P1 [2000-2019]		0	2798.42	0.928	1.027	1.107	107	115.4	104.2	91.91	26.45	17.41		n/a	n/a	n/a	n/a	High	High	High	High	High	High	High	High	n/a	n/a	n/a	n/a	High	High	High	High	High	High	High	High	n/a	n/a
	FALSE	High	[R].VNFGSPELR.[N]	1xTMTpro [N-Term]	FALSE	1	1	3	A0A7R8V9P1	A0A7R8V9P1 [3532-3540]		0	1322.74	1.116	0.503	0.451	50.4	45.2	100.4	38.12	82.94	8.2		High	High	High	High	High	High	High	High	High	High	High	High	High	High	High	High	High	High	High	High	High	High	High	High	High	High
	FALSE	High	[K].MLDNIAGYR.[A]	1xTMTpro [N-Term]	FALSE	1	1	3	A0A7R8V9P1	A0A7R8V9P1 [1395-1403]		0	1356.73	0.875	0.415	0.474	36.9	42.2	89	59.4	37.5	28.2		High	High	High	High	High	High	High	High	High	High	High	High	High	High	High	High	High	High	High	High	High	High	High	High	High	High
	FALSE	High	[R].TAVVLGDAK.[K]	1xTMTpro [N-Term]; 1xTMTpro [K9]	FALSE	1	1	5	A0A7R8V9P1	A0A7R8V9P1 [3521-3529]		0	1481.92	0.838	0.482	0.575	46.4	55.4	96.4	27.58	59.55	9.35		High	High	High	High	High	High	High	High	High	High	High	High	High	High	High	High	High	High	High	High	High	High	High	High	High	High
	FALSE	High	[K].DGVVEVLIK.[H]	1xTMTpro [N-Term]; 1xTMTpro [K9]	FALSE	1	1	4	A0A7R8V9P1	A0A7R8V9P1 [1904-1912]		0	1579.99	0.807	0.837	1.036	88.3	109.4	105.6	26	21.62	18.14		High	High	High	High	High	High	High	High	n/a	n/a	n/a	n/a	High	High	High	High	High	High	High	High	n/a	n/a	n/a	n/a	High	High
	FALSE	High	[R].VSLSVETEK.[K]	1xTMTpro [N-Term]; 1xTMTpro [K9]	FALSE	1	1	3	A0A7R8V9P1	A0A7R8V9P1 [1278-1286]		0	1599.94	1.127	0.754	0.669	77.9	69.1	103.4	29.98	51.59	10.23		High	High	High	High	High	High	High	High	High	High	High	High	High	High	High	High	High	High	High	High	High	High	High	High	High	High
	FALSE	High	[K].GAGGAGFGIDMNVR.[T]	1xTMTpro [N-Term]	FALSE	1	1	6	A0A7R8V9P1	A0A7R8V9P1 [1448-1461]		0	1625.84	0.973	0.924	0.949	85.2	87.5	92.2	17.72	11.07	17.76		High	High	High	High	High	High	High	High	High	High	High	High	High	High	High	High	High	High	High	High	High	High	High	High	High	High
	FALSE	High	[K].LEEIQSAIK.[K]	1xTMTpro [N-Term]; 1xTMTpro [K9]	FALSE	1	1	4	A0A7R8V9P1	A0A7R8V9P1 [2921-2929]		0	1638.99	0.782	0.974	1.246	91.5	117	93.9	12.55	35.04	15.65		High	High	High	High	High	High	High	High	High	High	High	High	High	High	High	High	High	High	High	High	High	High	High	High	High	High
	FALSE	High	[R].ENLNSMAQK.[F]	1xTMTpro [N-Term]; 1xTMTpro [K9]	FALSE	1	1	1	A0A7R8V9P1	A0A7R8V9P1 [1021-1029]		0	1642.91	2.577	0.491	0.191	48.4	18.8	98.6	67.93	133.2	37.78		n/a	n/a	n/a	n/a	High	High	High	High	n/a	n/a	n/a	n/a	n/a	n/a	n/a	n/a	High	High	High	High	n/a	n/a	n/a	n/a	n/a	n/a
	FALSE	High	[R].AAIEQNFNK.[I]	1xTMTpro [N-Term]; 1xTMTpro [K9]	FALSE	1	1	2	A0A7R8V9P1	A0A7R8V9P1 [2729-2737]		0	1642.94	0.651	0.468	0.718	53.4	82	114.1	31.4	87.14	39.07		High	High	High	High	n/a	n/a	n/a	n/a	High	High	High	High	High	High	High	High	n/a	n/a	n/a	n/a	High	High	High	High	High	High
	FALSE	High	[R].LNSDASYTSGK.[T]	1xTMTpro [N-Term]; 1xTMTpro [K11]	FALSE	1	1	10	A0A7R8V9P1	A0A7R8V9P1 [2091-2101]		0	1750.95	0.813	0.721	0.887	73.5	90.5	102	33.55	38.81	24.94		High	High	High	High	High	High	High	High	High	High	High	High	High	High	High	High	High	High	High	High	High	High	High	High	High	High
	FALSE	High	[R].LNSDASYTSGK.[T]	1xTMTpro [N-Term]; 1xDeamidated [N2]; 1xTMTpro [K11]	FALSE	1	1	7	A0A7R8V9P1	A0A7R8V9P1 [2091-2101]		0	1751.93	0.775	0.757	0.977	76.7	98.9	101.3	30.92	37.63	23.59		High	High	High	High	High	High	High	High	High	High	High	High	High	High	High	High	High	High	High	High	High	High	High	High	High	High
	FALSE	High	[K].EHNMLPPQAK.[R]	1xTMTpro [N-Term]; 1xTMTpro [K10]	FALSE	1	1	4	A0A7R8V9P1	A0A7R8V9P1 [3619-3628]		0	1773	0.967	0.943	0.975	99	102.3	104.9	2.67	16.6	18.28		High	High	High	High	High	High	High	High	High	High	High	High	High	High	High	High	High	High	High	High	High	High	High	High	High	High
	FALSE	High	[K].EVEDLVQLVK.[Q]	1xTMTpro [N-Term]; 1xTMTpro [K10]	FALSE	1	1	9	A0A7R8V9P1	A0A7R8V9P1 [2903-2912]		0	1780.07	0.849	1.122	1.322	110.1	129.7	98.1	5.26	29.66	22.59		High	High	High	High	High	High	High	High	High	High	High	High	High	High	High	High	High	High	High	High	High	High	High	High	High	High
	FALSE	High	[R].AGTDNSIATIIK.[L]	1xTMTpro [N-Term]; 1xTMTpro [K12]	FALSE	1	1	7	A0A7R8V9P1	A0A7R8V9P1 [685-696]		0	1812.07	1.678	0.831	0.495	84.4	50.3	101.6	33.97	57.72	13.72		High	High	High	High	High	High	High	High	High	High	High	High	High	High	High	High	High	High	High	High	High	High	High	High	High	High
	FALSE	High	[R].AGTDNSIATIIK.[L]	1xTMTpro [N-Term]; 1xDeamidated [N5]; 1xTMTpro [K12]	FALSE	1	1	6	A0A7R8V9P1	A0A7R8V9P1 [685-696]		0	1813.06	1.475	0.777	0.527	82	55.6	105.6	29.7	45.87	16.15		High	High	High	High	High	High	High	High	High	High	High	High	High	High	High	High	High	High	High	High	High	High	High	High	High	High
	FALSE	High	[R].SQQQGNIVGFDK.[R]	1xTMTpro [N-Term]; 1xTMTpro [K12]	FALSE	1	1	6	A0A7R8V9P1	A0A7R8V9P1 [3508-3519]		0	1929.07	0.933	0.713	0.764	71.7	76.9	100.6	16.34	32.27	8.5		High	High	High	High	High	High	High	High	High	High	High	High	High	High	High	High	High	High	High	High	High	High	High	High	High	High
	FALSE	High	[R].SQQQGNIVGFDK.[R]	1xTMTpro [N-Term]; 1xDeamidated [Q2]; 1xTMTpro [K12]	FALSE	1	1	6	A0A7R8V9P1	A0A7R8V9P1 [3508-3519]		0	1930.05	2.17	1.602	0.739	148.3	68.3	92.6	26.93	8.86	28.58		High	High	High	High	High	High	High	High	High	High	High	High	High	High	High	High	High	High	High	High	High	High	High	High	High	High
	FALSE	High	[K].NILSGSAEYNMK.[H]	1xTMTpro [N-Term]; 1xTMTpro [K12]	FALSE	1	1	3	A0A7R8V9P1	A0A7R8V9P1 [2255-2266]		0	1935.05	0.577	0.62	1.074	62.4	108.1	100.7	21.74	17.61	12.06		High	High	High	High	High	High	High	High	High	High	High	High	High	High	High	High	High	High	High	High	High	High	High	High	High	High
	FALSE	High	[K].NILSGSAEYNMK.[H]	1xTMTpro [N-Term]; 1xDeamidated [N10]; 1xTMTpro [K12]	FALSE	1	1	3	A0A7R8V9P1	A0A7R8V9P1 [2255-2266]		0	1936.03	0.884	0.798	0.902	82.1	92.8	102.9	11.37	16.63	9.58		High	High	High	High	High	High	High	High	High	High	High	High	High	High	High	High	High	High	High	High	High	High	High	High	High	High
	FALSE	High	[K].NILSGSAEYNMK.[H]	1xTMTpro [N-Term]; 1xOxidation [M11]; 1xTMTpro [K12]	FALSE	1	1	1	A0A7R8V9P1	A0A7R8V9P1 [2255-2266]		0	1951.05										No Quan Values	High	High	High	High	n/a	n/a	n/a	n/a	n/a	n/a	n/a	n/a	High	High	High	High	n/a	n/a	n/a	n/a	n/a	n/a	n/a	n/a	High	High
	FALSE	High	[K].NNLEIGYGPDLK.[Y]	1xTMTpro [N-Term]; 1xTMTpro [K12]	FALSE	1	1	9	A0A7R8V9P1	A0A7R8V9P1 [1512-1523]		0	1941.09	0.82	0.736	0.897	81.2	99	110.3	10.61	39.78	22.76		High	High	High	High	High	High	High	High	High	High	High	High	High	High	High	High	High	High	High	High	High	High	High	High	High	High
	FALSE	High	[K].NNLEIGYGPDLK.[Y]	1xDeamidated [N]; 1xTMTpro [N-Term]; 1xTMTpro [K12]	FALSE	1	1	8	A0A7R8V9P1	A0A7R8V9P1 [1512-1523]		0	1942.08	0.941	0.831	0.883	89.5	95.1	107.8	14.11	30.33	17.02		High	High	High	High	High	High	High	High	High	High	High	High	High	High	High	High	High	High	High	High	High	High	High	High	High	High
	FALSE	High	[K].SDDANLILDYSVK.[M]	1xTMTpro [N-Term]; 1xTMTpro [K13]	FALSE	1	1	6	A0A7R8V9P1	A0A7R8V9P1 [1036-1048]		0	2061.14	1.03	0.696	0.675	67.9	65.9	97.6	24.49	43.1	9.04		High	High	High	High	High	High	High	High	High	High	High	High	High	High	High	High	High	High	High	High	High	High	High	High	High	High
	FALSE	High	[K].SNMLELLPDAQVK.[L]	1xTMTpro [N-Term]; 1xTMTpro [K13]	FALSE	1	1	10	A0A7R8V9P1	A0A7R8V9P1 [3124-3136]		0	2066.18	0.855	0.814	0.952	86.2	100.9	106	12.37	15.62	13.8		High	High	High	High	High	High	High	High	High	High	High	High	High	High	High	High	High	High	High	High	High	High	High	High	High	High
	FALSE	High	[K].SNMLELLPDAQVK.[L]	1xTMTpro [N-Term]; 1xDeamidated [N2]; 1xTMTpro [K13]	FALSE	1	1	6	A0A7R8V9P1	A0A7R8V9P1 [3124-3136]		0	2067.17	0.884	0.89	1.007	91.4	103.4	102.7	6.6	13.96	16.61		High	High	High	High	High	High	High	High	High	High	High	High	High	High	High	High	High	High	High	High	High	High	High	High	High	High
	FALSE	High	[K].SNMLELLPDAQVK.[L]	1xTMTpro [N-Term]; 1xOxidation [M3]; 1xTMTpro [K13]	FALSE	1	1	4	A0A7R8V9P1	A0A7R8V9P1 [3124-3136]		0	2082.18	0.916	0.905	0.989	95.6	104.5	105.7	28.13	31.31	28.56		High	High	High	High	High	High	High	High	High	High	High	High	High	High	High	High	High	High	High	High	High	High	High	High	High	High
	FALSE	High	[R].ATLAGTVNDIQENVK.[S]	1xTMTpro [N-Term]; 1xTMTpro [K15]	FALSE	1	1	6	A0A7R8V9P1	A0A7R8V9P1 [619-633]		0	2181.24	1.027	0.597	0.581	64.2	62.5	107.6	31.41	71.68	21.1		High	High	High	High	High	High	High	High	High	High	High	High	High	High	High	High	High	High	High	High	High	High	High	High	High	High
	FALSE	High	[R].ATLAGTVNDIQENVK.[S]	1xTMTpro [N-Term]; 1xDeamidated [N8]; 1xTMTpro [K15]	FALSE	1	1	8	A0A7R8V9P1	A0A7R8V9P1 [619-633]		0	2182.22	1.088	0.784	0.72	81.4	74.8	103.9	20.18	35.5	14.34		High	High	High	High	High	High	High	High	High	High	High	High	High	High	High	High	High	High	High	High	High	High	High	High	High	High
	FALSE	High	[R].AIEDGNSVIEHWLK.[T]	1xTMTpro [N-Term]; 1xTMTpro [K14]	FALSE	1	1	9	A0A7R8V9P1	A0A7R8V9P1 [1619-1632]		0	2219.23	0.984	0.888	0.902	86.4	87.8	97.3	14.29	18.27	15.46		High	High	High	High	High	High	High	High	High	High	High	High	High	High	High	High	High	High	High	High	High	High	High	High	High	High
	FALSE	High	[R].AIEDGNSVIEHWLK.[T]	1xTMTpro [N-Term]; 1xDeamidated [N6]; 1xTMTpro [K14]	FALSE	1	1	4	A0A7R8V9P1	A0A7R8V9P1 [1619-1632]		0	2220.22	1.013	0.771	0.762	76.6	75.7	99.3	12.74	26.42	12.44		High	High	High	High	High	High	High	High	High	High	High	High	High	High	High	High	High	High	High	High	High	High	High	High	High	High
	FALSE	High	[R].ANVYPETNCGYTLK.[L]	1xTMTpro [N-Term]; 1xCarbamidomethyl [C9]; 1xTMTpro [K14]	FALSE	1	1	4	A0A7R8V9P1	A0A7R8V9P1 [392-405]		0	2238.17	1.175	0.798	0.679	78.7	67	98.7	21.48	28.14	5.93		High	High	High	High	n/a	n/a	n/a	n/a	High	High	High	High	High	High	High	High	n/a	n/a	n/a	n/a	High	High	High	High	High	High
	FALSE	High	[K].KISQEEVNDFESLK.[T]	1xTMTpro [N-Term]; 2xTMTpro [K1; K14]	FALSE	1	1	5	A0A7R8V9P1	A0A7R8V9P1 [2975-2988]		1	2578.45	0.849	1.06	1.249	109.4	128.9	103.2	14.65	50.42	29.78		High	High	High	High	High	High	High	High	High	High	High	High	High	High	High	High	High	High	High	High	High	High	High	High	High	High
	FALSE	High	[K].KISQEEVNDFESLK.[T]	1xTMTpro [N-Term]; 2xTMTpro [K1; K14]; 1xDeamidated [N/Q]	FALSE	1	1	2	A0A7R8V9P1	A0A7R8V9P1 [2975-2988]		1	2579.44	1.822	1.915	1.051	179.9	98.7	93.9	39.06	24.42	22.7		High	High	High	High	High	High	High	High	n/a	n/a	n/a	n/a	High	High	High	High	High	High	High	High	n/a	n/a	n/a	n/a	High	High
	FALSE	High	[K].YIGNLDGLK.[Q]	1xTMTpro [N-Term]; 1xTMTpro [K9]	FALSE	1	1	4	A0A7R8V9P1	A0A7R8V9P1 [2931-2939]		0	1600.96	0.775	0.58	0.748	55	71	94.9	21.91	65.12	39.3		High	High	High	High	High	High	High	High	High	High	High	High	High	High	High	High	High	High	High	High	High	High	High	High	High	High
	FALSE	High	[K].LANCQAQTK.[K]	1xTMTpro [N-Term]; 1xCarbamidomethyl [C4]; 1xTMTpro [K9]	FALSE	1	1	2	A0A7R8V9P1	A0A7R8V9P1 [774-782]		0	1641.92	1.239	0.471	0.38	42.5	34.3	90.3	53.49	90.21	37.3		n/a	n/a	n/a	n/a	High	High	High	High	High	High	High	High	n/a	n/a	n/a	n/a	High	High	High	High	High	High	High	High	n/a	n/a
	FALSE	High	[K].TTWGTSASLK.[G]	1xTMTpro [N-Term]; 1xTMTpro [K10]	FALSE	1	1	13	A0A7R8V9P1	A0A7R8V9P1 [1633-1642]		0	1659.96	0.774	0.718	0.927	76.5	98.8	106.6	10.98	26.91	14.79		High	High	High	High	High	High	High	High	High	High	High	High	High	High	High	High	High	High	High	High	High	High	High	High	High	High
	FALSE	High	[K].WELLHPDGLVK.[N]	1xTMTpro [N-Term]; 1xTMTpro [K11]	FALSE	1	1	2	A0A7R8V9P1	A0A7R8V9P1 [1501-1511]		0	1915.13	0.61	0.657	1.077	65.1	106.8	99.1	37.33	23.42	25.04		n/a	n/a	n/a	n/a	High	High	High	High	High	High	High	High	n/a	n/a	n/a	n/a	High	High	High	High	High	High	High	High	n/a	n/a
	FALSE	High	[R].DYSIDIDLPFK.[K]	1xTMTpro [N-Term]; 1xTMTpro [K11]	FALSE	1	1	4	A0A7R8V9P1	A0A7R8V9P1 [1194-1204]		0	1934.08	2.619	2.397	0.915	94	35.9	39.2	86.08	131.31	123.53		n/a	n/a	n/a	n/a	High	High	High	High	High	High	High	High	n/a	n/a	n/a	n/a	High	High	High	High	High	High	High	High	n/a	n/a
	FALSE	High	[K].LAQGSLEFDIFK.[K]	1xTMTpro [N-Term]; 1xTMTpro [K12]	FALSE	1	1	16	A0A7R8V9P1	A0A7R8V9P1 [2512-2523]		0	1976.13	0.853	0.77	0.902	74.4	87.2	96.6	7.74	19.23	17.17		High	High	High	High	High	High	High	High	High	High	High	High	High	High	High	High	High	High	High	High	High	High	High	High	High	High
	FALSE	High	[R].VSLSVETEKK.[I]	1xTMTpro [N-Term]; 2xTMTpro [K9; K10]	FALSE	1	1	1	A0A7R8V9P1	A0A7R8V9P1 [1278-1287]		1	2032.25	1.544	0.671	0.435	69.2	44.8	103	33.58	60.86	8.07		n/a	n/a	n/a	n/a	n/a	n/a	n/a	n/a	High	High	High	High	n/a	n/a	n/a	n/a	n/a	n/a	n/a	n/a	High	High	High	High	n/a	n/a
	FALSE	High	[R].SQQQGNIVGFDKR.[T]	1xTMTpro [N-Term]; 1xTMTpro [K12]	FALSE	1	1	1	A0A7R8V9P1	A0A7R8V9P1 [3508-3520]		1	2085.17	0.651	0.412	0.632	42.4	65.1	102.9	32.27	51.24	22.85		High	High	High	High	n/a	n/a	n/a	n/a	n/a	n/a	n/a	n/a	High	High	High	High	n/a	n/a	n/a	n/a	n/a	n/a	n/a	n/a	High	High
	FALSE	High	[K].FVPSVNVDLNAQMK.[I]	1xTMTpro [N-Term]; 1xTMTpro [K14]	FALSE	1	1	16	A0A7R8V9P1	A0A7R8V9P1 [1148-1161]		0	2170.22	1.101	0.856	0.778	85.8	77.9	100.2	10.11	19.1	8.19		High	High	High	High	High	High	High	High	High	High	High	High	High	High	High	High	High	High	High	High	High	High	High	High	High	High
	FALSE	High	[K].FVPSVNVDLNAQMK.[I]	1xTMTpro [N-Term]; 1xDeamidated [N10]; 1xTMTpro [K14]	FALSE	1	1	3	A0A7R8V9P1	A0A7R8V9P1 [1148-1161]		0	2171.2	1.091	0.915	0.839	91.9	84.2	100.4	11.86	14.94	8.24		High	High	High	High	High	High	High	High	High	High	High	High	High	High	High	High	High	High	High	High	High	High	High	High	High	High
	FALSE	High	[K].FVPSVNVDLNAQMK.[I]	1xTMTpro [N-Term]; 1xOxidation [M13]; 1xTMTpro [K14]	FALSE	1	1	9	A0A7R8V9P1	A0A7R8V9P1 [1148-1161]		0	2186.21	1.008	0.83	0.823	83.5	82.8	100.5	6.19	14.98	6.44		High	High	High	High	High	High	High	High	High	High	High	High	High	High	High	High	High	High	High	High	High	High	High	High	High	High
	FALSE	High	[K].FVPSVNVDLNAQMK.[I]	1xTMTpro [N-Term]; 1xDeamidated [Q12]; 1xOxidation [M13]; 1xTMTpro [K14]	FALSE	1	1	1	A0A7R8V9P1	A0A7R8V9P1 [1148-1161]		0	2187.2										No Quan Values	High	High	High	High	n/a	n/a	n/a	n/a	n/a	n/a	n/a	n/a	High	High	High	High	n/a	n/a	n/a	n/a	n/a	n/a	n/a	n/a	High	High
	FALSE	High	[K].IGSNEYEPMILIAGK.[D]	1xTMTpro [N-Term]; 1xTMTpro [K15]	FALSE	1	1	3	A0A7R8V9P1	A0A7R8V9P1 [1378-1392]		0	2243.26	0.912	0.85	0.932	83	90.9	97.6	16.18	26.37	13.45		High	High	High	High	High	High	High	High	High	High	High	High	High	High	High	High	High	High	High	High	High	High	High	High	High	High
	FALSE	High	[K].IALENVYQIPSDVFGK.[Y]	1xTMTpro [N-Term]; 1xTMTpro [K16]	FALSE	1	1	11	A0A7R8V9P1	A0A7R8V9P1 [2432-2447]		0	2401.36	0.87	0.845	0.972	76.8	88.2	90.8	36.47	26.65	47.28		High	High	High	High	High	High	High	High	High	High	High	High	High	High	High	High	High	High	High	High	High	High	High	High	High	High
	FALSE	High	[K].IALENVYQIPSDVFGK.[Y]	1xTMTpro [N-Term]; 1xDeamidated [N/Q]; 1xTMTpro [K16]	FALSE	1	1	4	A0A7R8V9P1	A0A7R8V9P1 [2432-2447]		0	2402.35	2.46	2.203	0.895	209.6	85.2	95.2	58.67	11.14	7.59		High	High	High	High	High	High	High	High	High	High	High	High	High	High	High	High	High	High	High	High	High	High	High	High	High	High
	FALSE	High	[R].NIKEIIDEISSDTSLR.[N]	1xTMTpro [N-Term]; 1xTMTpro [K3]	FALSE	1	1	6	A0A7R8V9P1	A0A7R8V9P1 [2766-2781]		1	2441.37	0.939	0.65	0.693	56.2	59.9	86.4	29.51	48.87	41.06		High	High	High	High	High	High	High	High	High	High	High	High	High	High	High	High	High	High	High	High	High	High	High	High	High	High
	FALSE	High	[R].QENLEQMMEHYFGPK.[G]	1xTMTpro [N-Term]; 1xTMTpro [K15]	FALSE	1	1	2	A0A7R8V9P1	A0A7R8V9P1 [986-1000]		0	2489.24	0.974	1.086	1.115	96.5	99	88.8	32.75	27.88	42.92		High	High	High	High	n/a	n/a	n/a	n/a	High	High	High	High	High	High	High	High	n/a	n/a	n/a	n/a	High	High	High	High	High	High
	FALSE	High	[K].ILYSFQSEAAASFEQYK.[L]	1xTMTpro [N-Term]; 1xTMTpro [K17]	FALSE	1	1	3	A0A7R8V9P1	A0A7R8V9P1 [2560-2576]		0	2590.37	0.982	0.912	0.93	92.6	94.3	101.5	18.51	17.45	7.6		High	High	High	High	High	High	High	High	High	High	High	High	High	High	High	High	High	High	High	High	High	High	High	High	High	High
	FALSE	High	[K].IPAELQAHIADGEHIFTFDGR.[H]	1xTMTpro [N-Term]	FALSE	1	1	1	A0A7R8V9P1	A0A7R8V9P1 [3064-3084]		0	2641.37	1.324	1.051	0.794	104.3	78.8	99.2	10.91	38.72	7.49		High	High	High	High	n/a	n/a	n/a	n/a	n/a	n/a	n/a	n/a	High	High	High	High	n/a	n/a	n/a	n/a	n/a	n/a	n/a	n/a	High	High
	FALSE	High	[K].LNGQYSQNILDYDFAANFGK.[G]	1xTMTpro [N-Term]; 1xTMTpro [K20]	FALSE	1	1	3	A0A7R8V9P1	A0A7R8V9P1 [1561-1580]		0	2886.49	0.799	1.162	1.455	115.4	144.5	99.3	8.98	21.25	5.35		High	High	High	High	High	High	High	High	n/a	n/a	n/a	n/a	High	High	High	High	High	High	High	High	n/a	n/a	n/a	n/a	High	High
	FALSE	High	[K].LNGQYSQNILDYDFAANFGK.[G]	1xTMTpro [N-Term]; 1xDeamidated [N/Q]; 1xTMTpro [K20]	FALSE	1	1	6	A0A7R8V9P1	A0A7R8V9P1 [1561-1580]		0	2887.48	0.971	0.814	0.839	84.5	87.1	103.8	17.14	34.89	25.56		High	High	High	High	High	High	High	High	High	High	High	High	High	High	High	High	High	High	High	High	High	High	High	High	High	High
	FALSE	High	[K].LNGQYSQNILDYDFAANFGK.[G]	1xTMTpro [N-Term]; 2xDeamidated [N17; N/Q]; 1xTMTpro [K20]	FALSE	1	1	2	A0A7R8V9P1	A0A7R8V9P1 [1561-1580]		0	2888.46										No Quan Values	n/a	n/a	n/a	n/a	High	High	High	High	n/a	n/a	n/a	n/a	n/a	n/a	n/a	n/a	High	High	High	High	n/a	n/a	n/a	n/a	n/a	n/a
	FALSE	High	[K].FTYINTDGKDGVVEVLIK.[H]	1xTMTpro [N-Term]; 1xDeamidated [N5]; 2xTMTpro [K9; K18]	FALSE	1	1	1	A0A7R8V9P1	A0A7R8V9P1 [1895-1912]		1	2924.68	0.949	0.811	0.854	79.2	83.5	97.7	17.59	13.35	10.47		n/a	n/a	n/a	n/a	High	High	High	High	n/a	n/a	n/a	n/a	n/a	n/a	n/a	n/a	High	High	High	High	n/a	n/a	n/a	n/a	n/a	n/a
	FALSE	High	[K].MVETSFSGSGALLEHPVEFNLK.[I]	1xTMTpro [N-Term]; 1xTMTpro [K22]	FALSE	1	1	1	A0A7R8V9P1	A0A7R8V9P1 [1921-1942]		0	3000.6	0.834	1.093	1.309	110	131.8	100.7	21.92	31.62	5.89		High	High	High	High	n/a	n/a	n/a	n/a	n/a	n/a	n/a	n/a	High	High	High	High	n/a	n/a	n/a	n/a	n/a	n/a	n/a	n/a	High	High
	FALSE	High	[K].SITLTDKSNMLELLPDAQVK.[L]	1xTMTpro [N-Term]; 2xTMTpro [K7; K20]	FALSE	1	1	2	A0A7R8V9P1	A0A7R8V9P1 [3117-3136]		1	3128.81	1.076	1.13	1.051	110.8	103	98	21.18	33.06	12.05		n/a	n/a	n/a	n/a	High	High	High	High	High	High	High	High	n/a	n/a	n/a	n/a	High	High	High	High	High	High	High	High	n/a	n/a
	FALSE	High	[K].GQYKGDLLDGTIDGNFNLGLPNGR.[Q]	1xTMTpro [N-Term]; 1xTMTpro [K4]	FALSE	1	1	4	A0A7R8V9P1	A0A7R8V9P1 [1813-1836]		1	3142.68	0.783	1.049	1.34	102.9	131.5	98.1	38.3	33.29	17.91		High	High	High	High	High	High	High	High	High	High	High	High	High	High	High	High	High	High	High	High	High	High	High	High	High	High
	FALSE	High	[K].GQYKGDLLDGTIDGNFNLGLPNGR.[Q]	1xTMTpro [N-Term]; 1xTMTpro [K4]; 1xDeamidated [N22]	FALSE	1	1	3	A0A7R8V9P1	A0A7R8V9P1 [1813-1836]		1	3143.66	1.083	0.762	0.704	73.7	68	96.6	33.55	33.58	26		High	High	High	High	High	High	High	High	High	High	High	High	High	High	High	High	High	High	High	High	High	High	High	High	High	High
	FALSE	High	[K].LSFTGELSHVAK.[T]	1xTMTpro [N-Term]; 1xTMTpro [K12]	FALSE	1	1	3	A0A7R8V9P1	A0A7R8V9P1 [2468-2479]		0	1897.1	0.871	0.736	0.844	75.7	86.9	102.9	15.38	26.57	13.73		High	High	High	High	High	High	High	High	High	High	High	High	High	High	High	High	High	High	High	High	High	High	High	High	High	High
	FALSE	High	[K].NGVGDVTVLFNLK.[K]	1xTMTpro [N-Term]; 1xTMTpro [K13]	FALSE	1	1	4	A0A7R8V9P1	A0A7R8V9P1 [1732-1744]		0	1984.17	0.808	1.045	1.293	99.8	123.5	95.5	12.42	22.36	15.33		High	High	High	High	High	High	High	High	High	High	High	High	High	High	High	High	High	High	High	High	High	High	High	High	High	High
	FALSE	High	[R].GSFHTSTGSDVTVK.[I]	1xTMTpro [N-Term]; 1xTMTpro [K14]	FALSE	1	1	3	A0A7R8V9P1	A0A7R8V9P1 [1175-1188]		0	2031.1	0.998	0.929	0.93	97.8	98	105.3	13.82	10.51	14.94		High	High	High	High	High	High	High	High	High	High	High	High	High	High	High	High	High	High	High	High	High	High	High	High	High	High
	FALSE	High	[K].SLESINALLDKNPPK.[E]	1xTMTpro [N-Term]; 2xTMTpro [K11; K15]	FALSE	1	1	3	A0A7R8V9P1	A0A7R8V9P1 [724-738]		1	2551.53	1.145	0.904	0.789	88.4	77.2	97.8	40.19	87.09	30.5		High	High	High	High	n/a	n/a	n/a	n/a	High	High	High	High	High	High	High	High	n/a	n/a	n/a	n/a	High	High	High	High	High	High
	FALSE	High	[R].VKPMTVAGYIDLNSEQK.[L]	1xTMTpro [N-Term]; 2xTMTpro [K2; K17]	FALSE	1	1	3	A0A7R8V9P1	A0A7R8V9P1 [2495-2511]		0	2805.6	1.009	1.123	1.113	107.9	107	96.1	26.82	51.36	16.37		High	High	High	High	High	High	High	High	High	High	High	High	High	High	High	High	High	High	High	High	High	High	High	High	High	High
	FALSE	High	[R].KIALENVYQIPSDVFGK.[Y]	1xTMTpro [N-Term]; 2xTMTpro [K1; K17]	FALSE	1	1	3	A0A7R8V9P1	A0A7R8V9P1 [2431-2447]		1	2833.66	0.912	1.174	1.288	113.9	125	97	17.24	12.9	37.52		High	High	High	High	High	High	High	High	High	High	High	High	High	High	High	High	High	High	High	High	High	High	High	High	High	High
	FALSE	High	[K].IKLNGQYSQNILDYDFAANFGK.[G]	1xTMTpro [N-Term]; 2xTMTpro [K2; K22]	FALSE	1	1	2	A0A7R8V9P1	A0A7R8V9P1 [1559-1580]		1	3431.88	0.906	1.312	1.448	128.7	142	98.1	11.1	20.11	12.24		High	High	High	High	High	High	High	High	n/a	n/a	n/a	n/a	High	High	High	High	High	High	High	High	n/a	n/a	n/a	n/a	High	High
	FALSE	High	[R].TPENKEYVLKSQLLIQAGHYVASATVLNR.[A]	1xTMTpro [N-Term]; 2xTMTpro [K5; K10]	FALSE	1	1	2	A0A7R8V9P1	A0A7R8V9P1 [1462-1490]		2	4155.37	0.876	1.126	1.286	114.8	131	101.9	18.82	12.36	19.34		High	High	High	High	n/a	n/a	n/a	n/a	High	High	High	High	High	High	High	High	n/a	n/a	n/a	n/a	High	High	High	High	High	High
	FALSE	High	[K].NDDTELALYGQYEHNHDESK.[A]	1xTMTpro [N-Term]; 1xTMTpro [K20]	FALSE	1	1	1	A0A7R8V9P1	A0A7R8V9P1 [1351-1370]		0	2986.43	0.814	0.703	0.864	69.3	85.2	98.6	7.12	39	24.76		n/a	n/a	n/a	n/a	High	High	High	High	n/a	n/a	n/a	n/a	n/a	n/a	n/a	n/a	High	High	High	High	n/a	n/a	n/a	n/a	n/a	n/a
	FALSE	High	[R].DSHIPVDVPDK.[C]	1xTMTpro [N-Term]; 1xTMTpro [K11]	FALSE	1	1	2	A0A7R8V9P1	A0A7R8V9P1 [3300-3310]		0	1830.03	0.954	1.001	1.05	115.9	121.5	115.7	41.1	18.4	59.03		n/a	n/a	n/a	n/a	High	High	High	High	High	High	High	High	n/a	n/a	n/a	n/a	High	High	High	High	High	High	High	High	n/a	n/a
	FALSE	High	[K].QCANIEVR.[S]	1xTMTpro [N-Term]; 1xCarbamidomethyl [C2]	FALSE	1	1	13	A0A7R8V9P1	A0A7R8V9P1 [2344-2351]		0	1293.69	0.861	0.766	0.89	79.7	92.6	104	16.23	31.31	26.21		High	High	High	High	High	High	High	High	High	High	High	High	High	High	High	High	High	High	High	High	High	High	High	High	High	High
	FALSE	High	[K].LIGDYDADLK.[I]	1xTMTpro [N-Term]; 1xTMTpro [K10]	FALSE	1	1	3	A0A7R8V9P1	A0A7R8V9P1 [1595-1604]		0	1730.98	0.774	0.773	0.998	82.1	106	106.2	41.19	41.14	27.88		n/a	n/a	n/a	n/a	High	High	High	High	High	High	High	High	n/a	n/a	n/a	n/a	High	High	High	High	High	High	High	High	n/a	n/a
	FALSE	High	[K].SNMLELLPDAQVK.[L]	1xTMTpro [N-Term]; 2xDeamidated [N2; Q11]; 1xTMTpro [K13]	FALSE	1	1	1	A0A7R8V9P1	A0A7R8V9P1 [3124-3136]		0	2068.15										No Quan Values	High	High	High	High	n/a	n/a	n/a	n/a	n/a	n/a	n/a	n/a	High	High	High	High	n/a	n/a	n/a	n/a	n/a	n/a	n/a	n/a	High	High
	FALSE	High	[K].FTYINTDGK.[D]	1xTMTpro [N-Term]; 1xTMTpro [K9]	FALSE	1	1	2	A0A7R8V9P1	A0A7R8V9P1 [1895-1903]		0	1666.93	0.748	0.735	0.983	77.4	103.4	105.2	21.93	43.08	21.83		High	High	High	High	High	High	High	High	n/a	n/a	n/a	n/a	High	High	High	High	High	High	High	High	n/a	n/a	n/a	n/a	High	High
	FALSE	High	[R].KLGDSFETK.[T]	1xTMTpro [N-Term]; 2xTMTpro [K1; K9]	FALSE	1	1	1	A0A7R8V9P1	A0A7R8V9P1 [3318-3326]		1	1937.15	0.961	0.794	0.827	84.2	87.7	106	12.06	26.12	23.92		n/a	n/a	n/a	n/a	n/a	n/a	n/a	n/a	High	High	High	High	n/a	n/a	n/a	n/a	n/a	n/a	n/a	n/a	High	High	High	High	n/a	n/a
	FALSE	High	[K].LAQGSLEFDIFK.[K]	1xTMTpro [N-Term]; 1xDeamidated [Q3]; 1xTMTpro [K12]	FALSE	1	1	2	A0A7R8V9P1	A0A7R8V9P1 [2512-2523]		0	1977.12	1.418	1.093	0.77	108.7	76.6	99.5	15.35	11.05	11.43		n/a	n/a	n/a	n/a	High	High	High	High	High	High	High	High	n/a	n/a	n/a	n/a	High	High	High	High	High	High	High	High	n/a	n/a
	FALSE	High	[R].VKPMTVAGYIDLNSEQK.[L]	1xTMTpro [N-Term]; 2xTMTpro [K2; K17]; 1xDeamidated [N13]	FALSE	1	1	2	A0A7R8V9P1	A0A7R8V9P1 [2495-2511]		0	2806.58	1.038	1.164	1.121	114.4	110.2	98.2	29.24	58.48	21.4		n/a	n/a	n/a	n/a	High	High	High	High	High	High	High	High	n/a	n/a	n/a	n/a	High	High	High	High	High	High	High	High	n/a	n/a
	FALSE	High	[R].NGLVAEER.[C]	1xTMTpro [N-Term]	FALSE	1	1	5	A0A7R8V9P1	A0A7R8V9P1 [3607-3614]		0	1191.67	0.618	0.605	0.979	59.9	96.9	99	25.48	72.14	27.85		High	High	High	High	High	High	High	High	High	High	High	High	High	High	High	High	High	High	High	High	High	High	High	High	High	High
	FALSE	High	[K].FELGTAPK.[W]	1xTMTpro [N-Term]; 1xTMTpro [K8]	FALSE	1	1	6	A0A7R8V9P1	A0A7R8V9P1 [1322-1329]		0	1470.88	1.222	0.69	0.565	73.9	60.4	107	28.12	46.24	17.49		High	High	High	High	High	High	High	High	High	High	High	High	High	High	High	High	High	High	High	High	High	High	High	High	High	High
	FALSE	High	[K].IFLDALFR.[A]	1xTMTpro [N-Term]	FALSE	1	1	3	A0A7R8V9P1	A0A7R8V9P1 [677-684]		0	1298.78	1.21	0.662	0.547	59.5	49.1	89.8	25.21	55.97	53.44		High	High	High	High	High	High	High	High	High	High	High	High	High	High	High	High	High	High	High	High	High	High	High	High	High	High
	FALSE	High	[K].FSVVANLQGGK.[M]	1xTMTpro [N-Term]; 1xTMTpro [K11]	FALSE	1	1	1	A0A7R8V9P1	A0A7R8V9P1 [3104-3114]		0	1728.03	0.719	0.846	1.176	84.9	118	100.4	11.47	35.97	6.66		n/a	n/a	n/a	n/a	High	High	High	High	n/a	n/a	n/a	n/a	n/a	n/a	n/a	n/a	High	High	High	High	n/a	n/a	n/a	n/a	n/a	n/a
	FALSE	High	[K].TAINLNGK.[L]	1xTMTpro [N-Term]; 1xDeamidated [N6]; 1xTMTpro [K8]	FALSE	1	1	3	A0A7R8V9P1	A0A7R8V9P1 [2480-2487]		0	1439.87	0.747	0.599	0.802	60.3	80.8	100.7	15.11	33.93	13.14		High	High	High	High	High	High	High	High	High	High	High	High	High	High	High	High	High	High	High	High	High	High	High	High	High	High
	FALSE	High	[K].TLYVSLVK.[A]	1xTMTpro [N-Term]; 1xTMTpro [K8]	FALSE	1	1	2	A0A7R8V9P1	A0A7R8V9P1 [2989-2996]		0	1530.98	0.75	0.694	0.926	67.8	90.4	97.7	23.95	23.58	8.32		High	High	High	High	n/a	n/a	n/a	n/a	High	High	High	High	High	High	High	High	n/a	n/a	n/a	n/a	High	High	High	High	High	High
	FALSE	High	[R].NGLVAEER.[C]	1xDeamidated [N1]; 1xTMTpro [N-Term]	FALSE	1	1	6	A0A7R8V9P1	A0A7R8V9P1 [3607-3614]		0	1192.65	0.742	0.712	0.96	74	99.6	103.8	48.9	77.57	21.49		High	High	High	High	High	High	High	High	High	High	High	High	High	High	High	High	High	High	High	High	High	High	High	High	High	High
	FALSE	High	[R].AELHEDYK.[F]	1xTMTpro [N-Term]; 1xTMTpro [K8]	FALSE	1	1	2	A0A7R8V9P1	A0A7R8V9P1 [552-559]		0	1612.88	1.281	0.778	0.607	79.6	62.1	102.3	42.3	60.6	32.37		High	High	High	High	High	High	High	High	n/a	n/a	n/a	n/a	High	High	High	High	High	High	High	High	n/a	n/a	n/a	n/a	High	High
	FALSE	High	[K].LGDSFETK.[T]	1xTMTpro [N-Term]; 1xTMTpro [K8]	FALSE	1	1	6	A0A7R8V9P1	A0A7R8V9P1 [3319-3326]		0	1504.85	0.93	0.778	0.836	83.7	90	107.6	11.21	25.16	23.62		High	High	High	High	High	High	High	High	High	High	High	High	High	High	High	High	High	High	High	High	High	High	High	High	High	High
	FALSE	High	[K].LATNLNLK.[D]	1xTMTpro [N-Term]; 1xTMTpro [K8]	FALSE	1	1	2	A0A7R8V9P1	A0A7R8V9P1 [1127-1134]		0	1494.95	0.931	0.943	1.013	92.2	99	97.7	32.98	63.28	13.4		High	High	High	High	High	High	High	High	n/a	n/a	n/a	n/a	High	High	High	High	High	High	High	High	n/a	n/a	n/a	n/a	High	High
	FALSE	High	[R].QISGDINR.[K]	1xTMTpro [N-Term]	FALSE	1	1	7	A0A7R8V9P1	A0A7R8V9P1 [1837-1844]		0	1206.68	0.811	0.753	0.928	72.7	89.6	96.6	42.25	46.45	28.59		High	High	High	High	High	High	High	High	High	High	High	High	High	High	High	High	High	High	High	High	High	High	High	High	High	High
	FALSE	High	[K].HLPNNNNK.[M]	1xTMTpro [N-Term]; 1xDeamidated [N]; 1xTMTpro [K8]	FALSE	1	1	4	A0A7R8V9P1	A0A7R8V9P1 [1913-1920]		0	1559.88	0.668	0.814	1.218	82.9	124.1	101.9	40.38	38.12	22.17		High	High	High	High	High	High	High	High	High	High	High	High	High	High	High	High	High	High	High	High	High	High	High	High	High	High
	FALSE	High	[K].ISQEEVNDFESLK.[T]	1xTMTpro [N-Term]; 2xDeamidated [Q3; N7]; 1xTMTpro [K13]	FALSE	1	1	1	A0A7R8V9P1	A0A7R8V9P1 [2976-2988]		0	2148.12	1.572	1.931	1.229	174.3	110.9	90.3	35.29	17.69	30.23		n/a	n/a	n/a	n/a	n/a	n/a	n/a	n/a	High	High	High	High	n/a	n/a	n/a	n/a	n/a	n/a	n/a	n/a	High	High	High	High	n/a	n/a
	FALSE	High	[K].FQNNLESK.[K]	1xTMTpro [N-Term]; 1xDeamidated [N3]; 1xTMTpro [K8]	FALSE	1	1	1	A0A7R8V9P1	A0A7R8V9P1 [1546-1553]		0	1588.88	0.853	0.742	0.87	75.2	88.2	101.4	19.23	19.93	12.81		n/a	n/a	n/a	n/a	High	High	High	High	n/a	n/a	n/a	n/a	n/a	n/a	n/a	n/a	High	High	High	High	n/a	n/a	n/a	n/a	n/a	n/a
	FALSE	High	[R].LVDLYHK.[F]	1xTMTpro [N-Term]; 1xTMTpro [K7]	FALSE	1	1	3	A0A7R8V9P1	A0A7R8V9P1 [1888-1894]		0	1495.91	0.911	0.932	1.023	76.2	83.6	81.7	28.29	33.89	60.37		High	High	High	High	High	High	High	High	High	High	High	High	High	High	High	High	High	High	High	High	High	High	High	High	High	High
	FALSE	High	[K].QFIESLPK.[L]	1xTMTpro [N-Term]; 1xTMTpro [K8]	FALSE	1	1	1	A0A7R8V9P1	A0A7R8V9P1 [2913-2920]		0	1569.95	0.57	0.883	1.548	78.8	138.3	89.3	23.19	49.64	26.37		n/a	n/a	n/a	n/a	n/a	n/a	n/a	n/a	High	High	High	High	n/a	n/a	n/a	n/a	n/a	n/a	n/a	n/a	High	High	High	High	n/a	n/a
	FALSE	High	[K].FQNNLESK.[K]	1xTMTpro [N-Term]; 1xTMTpro [K8]	FALSE	1	1	5	A0A7R8V9P1	A0A7R8V9P1 [1546-1553]		0	1587.9	0.754	0.733	0.972	76.9	101.9	104.8	25.41	26.57	15.03		High	High	High	High	High	High	High	High	High	High	High	High	High	High	High	High	High	High	High	High	High	High	High	High	High	High
	FALSE	High	[K].SNMLELLPDAQVK.[L]	1xTMTpro [N-Term]; 1xOxidation [M3]; 1xDeamidated [Q11]; 1xTMTpro [K13]	FALSE	1	1	1	A0A7R8V9P1	A0A7R8V9P1 [3124-3136]		0	2083.16	0.937	0.892	0.951	94.7	101	106.1	24.03	22.79	17.43		n/a	n/a	n/a	n/a	High	High	High	High	n/a	n/a	n/a	n/a	n/a	n/a	n/a	n/a	High	High	High	High	n/a	n/a	n/a	n/a	n/a	n/a
	FALSE	High	[K].HLPNNNNK.[M]	1xTMTpro [N-Term]; 1xTMTpro [K8]	FALSE	1	1	4	A0A7R8V9P1	A0A7R8V9P1 [1913-1920]		0	1558.89	0.872	0.859	0.984	94.6	108.4	110.1	22.84	42.51	28.02		High	High	High	High	High	High	High	High	High	High	High	High	High	High	High	High	High	High	High	High	High	High	High	High	High	High
	FALSE	High	[R].SHEAAGK.[Q]	1xTMTpro [N-Term]; 1xTMTpro [K7]	FALSE	1	1	7	A0A7R8V9P1	A0A7R8V9P1 [1007-1013]		0	1307.76	0.851	1.16	1.364	112	131.6	96.5	10.38	30.73	33.2		High	High	High	High	High	High	High	High	High	High	High	High	High	High	High	High	High	High	High	High	High	High	High	High	High	High
	FALSE	High	[R].DEKNDQGK.[Y]	1xTMTpro [N-Term]; 2xTMTpro [K3; K8]	FALSE	1	1	1	A0A7R8V9P1	A0A7R8V9P1 [2067-2074]		1	1846.05	0.758	0.791	1.044	82.2	108.5	103.9	18.99	49.55	34.19		n/a	n/a	n/a	n/a	High	High	High	High	n/a	n/a	n/a	n/a	n/a	n/a	n/a	n/a	High	High	High	High	n/a	n/a	n/a	n/a	n/a	n/a
	FALSE	High	[K].QEDNIVNILK.[G]	1xGln->pyro-Glu [N-Term]; 1xTMTpro [K10]	FALSE	1	1	2	A0A7R8V9P1	A0A7R8V9P1 [784-793]		0	1472.83	1.195	0.831	0.695	84.7	70.9	102	14.56	37.41	10.54		n/a	n/a	n/a	n/a	High	High	High	High	High	High	High	High	n/a	n/a	n/a	n/a	High	High	High	High	High	High	High	High	n/a	n/a
	FALSE	High	[K].LCFEHPR.[V]	1xTMTpro [N-Term]; 1xCarbamidomethyl [C2]	FALSE	1	1	4	A0A7R8V9P1	A0A7R8V9P1 [2488-2494]		0	1262.66	0.878	0.714	0.813	65.4	74.5	91.6	35.09	21.36	25.83		High	High	High	High	High	High	High	High	High	High	High	High	High	High	High	High	High	High	High	High	High	High	High	High	High	High
	FALSE	High	[K].IVSCEDKK.[Q]	1xTMTpro [N-Term]; 1xCarbamidomethyl [C4]; 2xTMTpro [K7; K8]	FALSE	1	1	2	A0A7R8V9P1	A0A7R8V9P1 [2336-2343]		1	1891.11	0.861	0.804	0.934	93.2	108.3	115.9	29.11	35	32.36		High	High	High	High	n/a	n/a	n/a	n/a	High	High	High	High	High	High	High	High	n/a	n/a	n/a	n/a	High	High	High	High	High	High
	FALSE	High	[R].VQVIQSK.[D]	1xTMTpro [N-Term]; 1xTMTpro [K7]	FALSE	1	1	6	A0A7R8V9P1	A0A7R8V9P1 [409-415]		0	1409.9	1.064	0.724	0.681	75.6	71	104.4	22.88	18.59	17.65		High	High	High	High	High	High	High	High	High	High	High	High	High	High	High	High	High	High	High	High	High	High	High	High	High	High
	FALSE	High	[R].GENANGK.[F]	1xTMTpro [N-Term]; 1xDeamidated [N5]; 1xTMTpro [K7]	FALSE	1	1	6	A0A7R8V9P1	A0A7R8V9P1 [1707-1713]		0	1298.72	0.802	0.84	1.048	91.6	114.2	109	33.73	46.18	27.48		High	High	High	High	High	High	High	High	High	High	High	High	High	High	High	High	High	High	High	High	High	High	High	High	High	High
	FALSE	High	[K].NTQGSTK.[V]	1xDeamidated [N1]; 1xTMTpro [N-Term]; 1xTMTpro [K7]	FALSE	1	1	1	A0A7R8V9P1	A0A7R8V9P1 [1683-1689]		0	1344.76	0.889	0.969	1.089	108.2	121.7	111.7	20.88	44.37	30.45		n/a	n/a	n/a	n/a	High	High	High	High	n/a	n/a	n/a	n/a	n/a	n/a	n/a	n/a	High	High	High	High	n/a	n/a	n/a	n/a	n/a	n/a
	FALSE	High	[R].SLLTQFK.[T]	1xTMTpro [N-Term]; 1xTMTpro [K7]	FALSE	1	1	2	A0A7R8V9P1	A0A7R8V9P1 [3000-3006]		0	1444.9	1.508	0.508	0.337	41.8	27.7	82.2	36.67	123.99	42.73		High	High	High	High	n/a	n/a	n/a	n/a	High	High	High	High	High	High	High	High	n/a	n/a	n/a	n/a	High	High	High	High	High	High
	FALSE	High	[K].DDSVQHK.[L]	1xTMTpro [N-Term]; 1xTMTpro [K7]	FALSE	1	1	1	A0A7R8V9P1	A0A7R8V9P1 [2359-2365]		0	1436.8										No Quan Values	n/a	n/a	n/a	n/a	High	High	High	High	n/a	n/a	n/a	n/a	n/a	n/a	n/a	n/a	High	High	High	High	n/a	n/a	n/a	n/a	n/a	n/a
	FALSE	High	[R].NIVDFYK.[R]	1xTMTpro [N-Term]; 1xTMTpro [K7]	FALSE	1	1	3	A0A7R8V9P1	A0A7R8V9P1 [2782-2788]		0	1506.88	0.63	0.715	1.135	68.4	108.6	95.7	36.25	76.57	26.08		High	High	High	High	High	High	High	High	High	High	High	High	High	High	High	High	High	High	High	High	High	High	High	High	High	High
	FALSE	High	[R].SITLAEK.[D]	1xTMTpro [N-Term]; 1xTMTpro [K7]	FALSE	1	1	4	A0A7R8V9P1	A0A7R8V9P1 [2352-2358]		0	1369.85	0.707	0.841	1.189	95.3	134.8	113.4	18.32	35.73	31.04		High	High	High	High	High	High	High	High	High	High	High	High	High	High	High	High	High	High	High	High	High	High	High	High	High	High
	FALSE	High	[RK].LLETELK.[ED]	1xTMTpro [N-Term]; 1xTMTpro [K7]	FALSE	1	2	5	A0A7R8V9P1	A0A7R8V9P1 [697-703]		0	1453.91	1.135	0.8	0.705	82.7	72.9	103.3	28.4	53.76	25.84		High	High	High	High	High	High	High	High	High	High	High	High	High	High	High	High	High	High	High	High	High	High	High	High	High	High
	FALSE	High	[K].IFADFSK.[Q]	1xTMTpro [N-Term]; 1xTMTpro [K7]	FALSE	1	1	2	A0A7R8V9P1	A0A7R8V9P1 [2881-2887]		0	1435.84	0.45	0.436	0.97	42.8	95.1	98.1	39.2	35.14	11.96		n/a	n/a	n/a	n/a	High	High	High	High	High	High	High	High	n/a	n/a	n/a	n/a	High	High	High	High	High	High	High	High	n/a	n/a
	FALSE	High	[R].GENANGK.[F]	1xTMTpro [N-Term]; 1xTMTpro [K7]	FALSE	1	1	2	A0A7R8V9P1	A0A7R8V9P1 [1707-1713]		0	1297.74	0.719	0.883	1.228	92.1	128.2	104.4	41.6	40.96	36.82		High	High	High	High	n/a	n/a	n/a	n/a	High	High	High	High	High	High	High	High	n/a	n/a	n/a	n/a	High	High	High	High	High	High
	FALSE	High	[K].VNEEGIK.[D]	1xTMTpro [N-Term]; 1xTMTpro [K7]	FALSE	1	1	6	A0A7R8V9P1	A0A7R8V9P1 [2704-2710]		0	1396.83	1.503	0.962	0.64	95.3	63.4	99.1	29.71	58.85	25.18		High	High	High	High	High	High	High	High	High	High	High	High	High	High	High	High	High	High	High	High	High	High	High	High	High	High
	FALSE	High	[K].IVSCEDK.[K]	1xTMTpro [N-Term]; 1xCarbamidomethyl [C4]; 1xTMTpro [K7]	FALSE	1	1	4	A0A7R8V9P1	A0A7R8V9P1 [2336-2342]		0	1458.81	0.798	0.785	0.984	85.3	106.8	108.6	30.07	39.7	28.57		n/a	n/a	n/a	n/a	High	High	High	High	High	High	High	High	n/a	n/a	n/a	n/a	High	High	High	High	High	High	High	High	n/a	n/a
	FALSE	High	[R].NIESEFK.[V]	1xTMTpro [N-Term]; 1xTMTpro [K7]	FALSE	1	1	4	A0A7R8V9P1	A0A7R8V9P1 [2320-2326]		0	1474.84	0.79	0.781	0.989	81.6	103.4	104.6	9.86	28.08	24.4		High	High	High	High	High	High	High	High	High	High	High	High	High	High	High	High	High	High	High	High	High	High	High	High	High	High
	FALSE	High	[R].GENANGK.[F]	1xTMTpro [N-Term]; 2xDeamidated [N3; N5]; 1xTMTpro [K7]	FALSE	1	1	3	A0A7R8V9P1	A0A7R8V9P1 [1707-1713]		0	1299.7	0.818	0.934	1.141	99.6	121.6	106.6	36.84	39.24	23.72		High	High	High	High	High	High	High	High	High	High	High	High	High	High	High	High	High	High	High	High	High	High	High	High	High	High
	FALSE	High	[K].HLPNNNNK.[M]	1xTMTpro [N-Term]; 2xDeamidated [N6; N]; 1xTMTpro [K8]	FALSE	1	1	2	A0A7R8V9P1	A0A7R8V9P1 [1913-1920]		0	1560.86	0.935	0.869	0.929	95.8	102.4	110.2	25.64	43.28	26.18		High	High	High	High	n/a	n/a	n/a	n/a	n/a	n/a	n/a	n/a	High	High	High	High	n/a	n/a	n/a	n/a	n/a	n/a	n/a	n/a	High	High
	FALSE	High	[K].LYDVIQK.[E]	1xTMTpro [N-Term]; 1xTMTpro [K7]	FALSE	1	1	2	A0A7R8V9P1	A0A7R8V9P1 [2896-2902]		0	1486.91	0.701	0.847	1.208	82.2	117.2	97	29.8	41.37	21.39		High	High	High	High	High	High	High	High	n/a	n/a	n/a	n/a	High	High	High	High	High	High	High	High	n/a	n/a	n/a	n/a	High	High
	FALSE	High	[K].TQFQSYK.[M]	1xTMTpro [N-Term]; 1xTMTpro [K7]	FALSE	1	1	3	A0A7R8V9P1	A0A7R8V9P1 [1993-1999]		0	1509.86	0.587	0.412	0.703	40.7	69.4	98.8	33.09	28.66	13.01		High	High	High	High	High	High	High	High	High	High	High	High	High	High	High	High	High	High	High	High	High	High	High	High	High	High
	FALSE	High	[R].SLAMDVK.[F]	1xTMTpro [N-Term]; 1xTMTpro [K7]	FALSE	1	1	4	A0A7R8V9P1	A0A7R8V9P1 [1872-1878]		0	1371.82	0.724	0.675	0.932	58.9	81.3	87.3	58.99	49.27	33.95		High	High	High	High	High	High	High	High	High	High	High	High	High	High	High	High	High	High	High	High	High	High	High	High	High	High
	FALSE	High	[K].SITLTDK.[S]	1xTMTpro [N-Term]; 1xTMTpro [K7]	FALSE	1	1	3	A0A7R8V9P1	A0A7R8V9P1 [3117-3123]		0	1385.85	0.763	0.776	1.017	81	106.2	104.5	7.02	21.53	13.09		n/a	n/a	n/a	n/a	High	High	High	High	High	High	High	High	n/a	n/a	n/a	n/a	High	High	High	High	High	High	High	High	n/a	n/a
	FALSE	High	[K].GADGLCK.[E]	1xTMTpro [N-Term]; 1xCarbamidomethyl [C6]; 1xTMTpro [K7]	FALSE	1	1	3	A0A7R8V9P1	A0A7R8V9P1 [3242-3248]		0	1328.75	1.596	1.31	0.82	135.1	84.6	103.2	26.16	59.12	35.82		High	High	High	High	High	High	High	High	High	High	High	High	High	High	High	High	High	High	High	High	High	High	High	High	High	High
	FALSE	High	[K].VNEEGIK.[D]	1xTMTpro [N-Term]; 1xDeamidated [N2]; 1xTMTpro [K7]	FALSE	1	1	1	A0A7R8V9P1	A0A7R8V9P1 [2704-2710]		0	1397.81	0.897	1.065	1.187	112.1	124.9	105.2	10.89	19.59	19.91		High	High	High	High	n/a	n/a	n/a	n/a	n/a	n/a	n/a	n/a	High	High	High	High	n/a	n/a	n/a	n/a	n/a	n/a	n/a	n/a	High	High
FALSE	High	Master Protein	A0A7R8YUM2	Fatty acid synthase OS=Hermetia illucens OX=343691 GN=HERILL_LOCUS8760 PE=4 SV=1	0	681.035	40	83	635	83	2416	264.8	6.54	16549	83	0	1.233	0.959	0.777	0.510046	0.549665	0.119382	94.5	76.6	98.5	14.93	15.92	6.74	High	High	High	1	Phospho [T2113; S2115; S2120]
	Checked	Confidence	Annotated Sequence	Modifications	Contaminant	# Protein Groups	# Proteins	# PSMs	Master Protein Accessions	Positions in Master Proteins	Modifications in Master Proteins	# Missed Cleavages	Theo. MH+ [Da]	Abundance Ratio: (10 mM FAC) / (100 mM FAC)	Abundance Ratio: (10 mM FAC) / (CNTRL)	Abundance Ratio: (100 mM FAC) / (CNTRL)	Abundances (Grouped): 10 mM FAC	Abundances (Grouped): 100 mM FAC	Abundances (Grouped): CNTRL	Abundances (Grouped) CV [%]: 10 mM FAC	Abundances (Grouped) CV [%]: 100 mM FAC	Abundances (Grouped) CV [%]: CNTRL	Quan Info	Found in Sample: F1: 128C, Sample, 5, 10 mM FAC	Found in Sample: F1: 129N, Sample, 6, 10 mM FAC	Found in Sample: F1: 129C, Sample, 7, 10 mM FAC	Found in Sample: F1: 130N, Sample, 8, 10 mM FAC	Found in Sample: F2: 128C, Sample, 5, 10 mM FAC	Found in Sample: F2: 129N, Sample, 6, 10 mM FAC	Found in Sample: F2: 129C, Sample, 7, 10 mM FAC	Found in Sample: F2: 130N, Sample, 8, 10 mM FAC	Found in Sample: F3: 128C, Sample, 5, 10 mM FAC	Found in Sample: F3: 129N, Sample, 6, 10 mM FAC	Found in Sample: F3: 129C, Sample, 7, 10 mM FAC	Found in Sample: F3: 130N, Sample, 8, 10 mM FAC	Found in Sample: F1: 130C, Sample, 9, 100 mM FAC	Found in Sample: F1: 131N, Sample, 10, 100 mM FAC	Found in Sample: F1: 131C, Sample, 11, 100 mM FAC	Found in Sample: F1: 132N, Sample, 12, 100 mM FAC	Found in Sample: F2: 130C, Sample, 9, 100 mM FAC	Found in Sample: F2: 131N, Sample, 10, 100 mM FAC	Found in Sample: F2: 131C, Sample, 11, 100 mM FAC	Found in Sample: F2: 132N, Sample, 12, 100 mM FAC	Found in Sample: F3: 130C, Sample, 9, 100 mM FAC	Found in Sample: F3: 131N, Sample, 10, 100 mM FAC	Found in Sample: F3: 131C, Sample, 11, 100 mM FAC	Found in Sample: F3: 132N, Sample, 12, 100 mM FAC	Found in Sample: F1: 126, Control, 1, CNTRL	Found in Sample: F1: 127N, Control, 2, CNTRL
	FALSE	High	[R].FAEEVVADNR.[C]	1xTMTpro [N-Term]	FALSE	1	1	8	A0A7R8YUM2	A0A7R8YUM2 [5-14]		0	1453.76	1.377	0.816	0.592	84	61	103	26.53	15.64	39.04		High	High	High	High	High	High	High	High	High	High	High	High	High	High	High	High	High	High	High	High	High	High	High	High	High	High
	FALSE	High	[R].AFDDSGAGYVR.[S]	1xTMTpro [N-Term]	FALSE	1	1	11	A0A7R8YUM2	A0A7R8YUM2 [246-256]		0	1461.73	0.988	0.85	0.861	89	90.1	104.7	31.8	13.04	16.39		High	High	High	High	High	High	High	High	High	High	High	High	High	High	High	High	High	High	High	High	High	High	High	High	High	High
	FALSE	High	[R].EVVECMDTK.[R]	1xTMTpro [N-Term]; 1xCarbamidomethyl [C5]; 1xTMTpro [K9]	FALSE	1	1	6	A0A7R8YUM2	A0A7R8YUM2 [513-521]		0	1718.89	1.181	0.838	0.71	87.9	74.4	104.8	13.65	42.67	30.13		High	High	High	High	High	High	High	High	High	High	High	High	High	High	High	High	High	High	High	High	High	High	High	High	High	High
	FALSE	High	[K].ELQTAEDENK.[F]	1xTMTpro [N-Term]; 1xTMTpro [K10]	FALSE	1	1	5	A0A7R8YUM2	A0A7R8YUM2 [1349-1358]		0	1784.95	1.027	1.245	1.212	133.4	129.9	107.1	17.43	20.27	30.41		High	High	High	High	High	High	High	High	High	High	High	High	High	High	High	High	High	High	High	High	High	High	High	High	High	High
	FALSE	High	[K].DEDAFLAGHNIDGR.[I]	1xTMTpro [N-Term]	FALSE	1	1	4	A0A7R8YUM2	A0A7R8YUM2 [897-910]		0	1833.91	0.971	1.204	1.24	123.3	126.9	102.4	10.83	13.89	21.54		High	High	High	High	High	High	High	High	High	High	High	High	High	High	High	High	High	High	High	High	High	High	High	High	High	High
	FALSE	High	[K].NLFEGVDMVNDDPR.[R]	1xTMTpro [N-Term]	FALSE	1	1	9	A0A7R8YUM2	A0A7R8YUM2 [55-68]		0	1924.94	1.466	0.854	0.583	85.9	58.6	100.6	30.26	41.16	17.82		High	High	High	High	High	High	High	High	High	High	High	High	High	High	High	High	High	High	High	High	High	High	High	High	High	High
	FALSE	High	[K].NLFEGVDMVNDDPR.[R]	1xTMTpro [N-Term]; 1xDeamidated [N]	FALSE	1	1	7	A0A7R8YUM2	A0A7R8YUM2 [55-68]		0	1925.92	1.187	1.05	0.884	102.9	86.7	98.1	8.46	14.4	25.2		High	High	High	High	High	High	High	High	High	High	High	High	High	High	High	High	High	High	High	High	High	High	High	High	High	High
	FALSE	High	[K].NLFEGVDMVNDDPR.[R]	1xTMTpro [N-Term]; 1xOxidation [M8]	FALSE	1	1	9	A0A7R8YUM2	A0A7R8YUM2 [55-68]		0	1940.93	1.094	1.009	0.922	98.4	90	97.5	6.02	5.18	17.36		High	High	High	High	High	High	High	High	High	High	High	High	High	High	High	High	High	High	High	High	High	High	High	High	High	High
	FALSE	High	[R].DGLLENQTEQDFK.[T]	1xTMTpro [N-Term]; 1xTMTpro [K13]	FALSE	1	1	11	A0A7R8YUM2	A0A7R8YUM2 [1895-1907]		0	2145.13	1.09	1.064	0.976	110.8	101.7	104.2	3.84	6.8	21.78		High	High	High	High	High	High	High	High	High	High	High	High	High	High	High	High	High	High	High	High	High	High	High	High	High	High
	FALSE	High	[R].DGLLENQTEQDFK.[T]	1xTMTpro [N-Term]; 1xDeamidated [N6]; 1xTMTpro [K13]	FALSE	1	1	6	A0A7R8YUM2	A0A7R8YUM2 [1895-1907]		0	2146.12	1.054	1.045	0.992	109.7	104.1	105	5.33	14.08	26.63		High	High	High	High	High	High	High	High	High	High	High	High	High	High	High	High	High	High	High	High	High	High	High	High	High	High
	FALSE	High	[K].ELEGSAGGTVSPAPVSPSK.[S]	1xTMTpro [N-Term]; 1xTMTpro [K19]	FALSE	1	1	6	A0A7R8YUM2	A0A7R8YUM2 [2105-2123]		0	2378.31	1.294	1.035	0.8	100.7	77.8	97.3	20.28	14.12	16.13		High	High	High	High	High	High	High	High	High	High	High	High	High	High	High	High	High	High	High	High	High	High	High	High	High	High
	FALSE	High	[K].ELEGSAGGTVSPAPVSPSK.[S]	1xTMTpro [N-Term]; 1xPhospho [S/T]; 1xTMTpro [K19]	FALSE	1	1	7	A0A7R8YUM2	A0A7R8YUM2 [2105-2123]	A0A7R8YUM2 1xPhospho [S/T]	0	2458.27	1.048	1.191	1.137	118.4	113	99.4	16.69	5.41	13.77		High	High	High	High	High	High	High	High	High	High	High	High	High	High	High	High	High	High	High	High	High	High	High	High	High	High
	FALSE	High	[K].ELEGSAGGTVSPAPVSPSK.[S]	1xTMTpro [N-Term]; 2xPhospho [S16; S/T]; 1xTMTpro [K19]	FALSE	1	1	8	A0A7R8YUM2	A0A7R8YUM2 [2105-2123]	A0A7R8YUM2 2xPhospho [S2120; S/T]	0	2538.24	1.018	1.539	1.512	157	154.3	102.1	15.52	14.72	16.16		High	High	High	High	High	High	High	High	High	High	High	High	High	High	High	High	High	High	High	High	High	High	High	High	High	High
	FALSE	High	[K].ILTVEGNHR.[T]	1xTMTpro [N-Term]	FALSE	1	1	6	A0A7R8YUM2	A0A7R8YUM2 [2387-2395]		0	1342.78	1.044	0.818	0.783	81.4	78	99.6	26.71	11.13	9.44		High	High	High	High	High	High	High	High	n/a	n/a	n/a	n/a	High	High	High	High	High	High	High	High	n/a	n/a	n/a	n/a	High	High
	FALSE	High	[K].ILTVEGNHR.[T]	1xTMTpro [N-Term]; 1xDeamidated [N7]	FALSE	1	1	4	A0A7R8YUM2	A0A7R8YUM2 [2387-2395]		0	1343.76	1.049	0.952	0.907	93.1	88.7	97.9	14.64	13.01	8.4		High	High	High	High	High	High	High	High	High	High	High	High	High	High	High	High	High	High	High	High	High	High	High	High	High	High
	FALSE	High	[K].EQGITFPDGR.[M]	1xTMTpro [N-Term]	FALSE	1	1	8	A0A7R8YUM2	A0A7R8YUM2 [290-299]		0	1423.75	1.184	0.934	0.789	93.2	78.8	99.8	23.58	15.39	18.73		High	High	High	High	High	High	High	High	High	High	High	High	High	High	High	High	High	High	High	High	High	High	High	High	High	High
	FALSE	High	[R].DTSFEQLIMR.[E]	1xTMTpro [N-Term]	FALSE	1	1	3	A0A7R8YUM2	A0A7R8YUM2 [1644-1653]		0	1543.81	0.812	1.003	1.235	90.5	111.4	90.2	23.31	31.54	38.77		High	High	High	High	High	High	High	High	High	High	High	High	High	High	High	High	High	High	High	High	High	High	High	High	High	High
	FALSE	High	[R].DTSFEQLIMR.[E]	1xTMTpro [N-Term]; 1xDeamidated [Q6]	FALSE	1	1	1	A0A7R8YUM2	A0A7R8YUM2 [1644-1653]		0	1544.79	2.089	1.478	0.707	111.4	53.3	75.4	48.13	8.18	64.12		High	High	High	High	n/a	n/a	n/a	n/a	n/a	n/a	n/a	n/a	High	High	High	High	n/a	n/a	n/a	n/a	n/a	n/a	n/a	n/a	High	High
	FALSE	High	[R].NFDVVMTPQEIR.[Q]	1xTMTpro [N-Term]	FALSE	1	1	21	A0A7R8YUM2	A0A7R8YUM2 [2085-2096]		0	1752.93	1.121	0.792	0.707	77.3	69	97.6	18.59	16.33	7.92		High	High	High	High	High	High	High	High	High	High	High	High	High	High	High	High	High	High	High	High	High	High	High	High	High	High
	FALSE	High	[R].NFDVVMTPQEIR.[Q]	1xDeamidated [N1]; 1xTMTpro [N-Term]	FALSE	1	1	2	A0A7R8YUM2	A0A7R8YUM2 [2085-2096]		0	1753.91	1.034	1.095	1.059	104.6	101.2	95.5	10.77	9.12	14.48		n/a	n/a	n/a	n/a	High	High	High	High	High	High	High	High	n/a	n/a	n/a	n/a	High	High	High	High	High	High	High	High	n/a	n/a
	FALSE	High	[R].NFDVVMTPQEIR.[Q]	1xTMTpro [N-Term]; 1xOxidation [M6]	FALSE	1	1	6	A0A7R8YUM2	A0A7R8YUM2 [2085-2096]		0	1768.92	0.991	0.734	0.741	72.8	73.4	99.1	15.9	10.98	2.8		High	High	High	High	High	High	High	High	High	High	High	High	High	High	High	High	High	High	High	High	High	High	High	High	High	High
	FALSE	High	[R].GVDLVLNSLADEK.[L]	1xTMTpro [N-Term]; 1xTMTpro [K13]	FALSE	1	1	10	A0A7R8YUM2	A0A7R8YUM2 [1659-1671]		0	1981.15	1.318	0.925	0.702	89.3	67.7	96.5	14.2	29.43	4.63		High	High	High	High	High	High	High	High	High	High	High	High	High	High	High	High	High	High	High	High	High	High	High	High	High	High
	FALSE	High	[R].GVDLVLNSLADEK.[L]	1xTMTpro [N-Term]; 1xDeamidated [N7]; 1xTMTpro [K13]	FALSE	1	1	6	A0A7R8YUM2	A0A7R8YUM2 [1659-1671]		0	1982.13	1.182	0.991	0.839	99.5	84.2	100.3	7.44	14.4	6.31		High	High	High	High	High	High	High	High	High	High	High	High	High	High	High	High	High	High	High	High	High	High	High	High	High	High
	FALSE	High	[K].NLFEGVDMVNDDPRR.[W]	1xTMTpro [N-Term]	FALSE	1	1	6	A0A7R8YUM2	A0A7R8YUM2 [55-69]		1	2081.04	1.503	0.854	0.568	84	55.9	98.3	26.57	20.86	13.35		High	High	High	High	High	High	High	High	High	High	High	High	High	High	High	High	High	High	High	High	High	High	High	High	High	High
	FALSE	High	[K].NLFEGVDMVNDDPRR.[W]	1xTMTpro [N-Term]; 1xDeamidated [N10]	FALSE	1	1	6	A0A7R8YUM2	A0A7R8YUM2 [55-69]		1	2082.02	1.773	1.142	0.644	120.5	68	105.5	74.22	22.46	14.94		High	High	High	High	n/a	n/a	n/a	n/a	High	High	High	High	High	High	High	High	n/a	n/a	n/a	n/a	High	High	High	High	High	High
	FALSE	High	[K].NLFEGVDMVNDDPRR.[W]	2xDeamidated [N1; N10]; 1xTMTpro [N-Term]	FALSE	1	1	1	A0A7R8YUM2	A0A7R8YUM2 [55-69]		1	2083.01										No Quan Values	n/a	n/a	n/a	n/a	High	High	High	High	n/a	n/a	n/a	n/a	n/a	n/a	n/a	n/a	High	High	High	High	n/a	n/a	n/a	n/a	n/a	n/a
	FALSE	High	[K].NLFEGVDMVNDDPRR.[W]	1xTMTpro [N-Term]; 1xOxidation [M8]	FALSE	1	1	5	A0A7R8YUM2	A0A7R8YUM2 [55-69]		1	2097.04	1.287	0.831	0.646	80.8	62.8	97.3	21.67	23.85	13.25		High	High	High	High	High	High	High	High	High	High	High	High	High	High	High	High	High	High	High	High	High	High	High	High	High	High
	FALSE	High	[K].LEADYGLSEVCQK.[D]	1xTMTpro [N-Term]; 1xCarbamidomethyl [C11]; 1xTMTpro [K13]	FALSE	1	1	4	A0A7R8YUM2	A0A7R8YUM2 [2371-2383]		0	2120.12	1.105	0.865	0.782	87	78.7	100.7	18.55	16.08	28.67		High	High	High	High	High	High	High	High	High	High	High	High	High	High	High	High	High	High	High	High	High	High	High	High	High	High
	FALSE	High	[K].LEADYGLSEVCQK.[D]	1xTMTpro [N-Term]; 1xCarbamidomethyl [C11]; 1xDeamidated [Q12]; 1xTMTpro [K13]	FALSE	1	1	1	A0A7R8YUM2	A0A7R8YUM2 [2371-2383]		0	2121.1	1.166	0.941	0.807	94	80.6	99.9	17.48	9.99	30.62		n/a	n/a	n/a	n/a	n/a	n/a	n/a	n/a	High	High	High	High	n/a	n/a	n/a	n/a	n/a	n/a	n/a	n/a	High	High	High	High	n/a	n/a
	FALSE	High	[K].KELQTAEDENK.[F]	1xTMTpro [N-Term]; 2xTMTpro [K1; K11]	FALSE	1	1	1	A0A7R8YUM2	A0A7R8YUM2 [1348-1358]		1	2217.25	1.069	1.551	1.451	155	145	99.9	11.66	40.54	42.07		High	High	High	High	n/a	n/a	n/a	n/a	n/a	n/a	n/a	n/a	High	High	High	High	n/a	n/a	n/a	n/a	n/a	n/a	n/a	n/a	High	High
	FALSE	High	[R].TNTDGQKEQGITFPDGR.[M]	1xTMTpro [N-Term]; 1xTMTpro [K7]	FALSE	1	1	1	A0A7R8YUM2	A0A7R8YUM2 [283-299]		1	2472.3	1.547	0.629	0.407	61	39.4	96.9	39.05	60	25.36		n/a	n/a	n/a	n/a	High	High	High	High	n/a	n/a	n/a	n/a	n/a	n/a	n/a	n/a	High	High	High	High	n/a	n/a	n/a	n/a	n/a	n/a
	FALSE	High	[R].GVQVAIDTNDVTTSEGCK.[K]	1xTMTpro [N-Term]; 1xCarbamidomethyl [C17]; 1xTMTpro [K18]	FALSE	1	1	4	A0A7R8YUM2	A0A7R8YUM2 [1854-1871]		0	2502.3	0.855	1.232	1.441	129.9	151.8	105.4	32.69	24.81	30.74		High	High	High	High	High	High	High	High	High	High	High	High	High	High	High	High	High	High	High	High	High	High	High	High	High	High
	FALSE	High	[R].EEGFILLDEVQSNYEK.[N]	1xTMTpro [N-Term]; 1xTMTpro [K16]	FALSE	1	1	25	A0A7R8YUM2	A0A7R8YUM2 [1278-1293]		0	2521.33	1.156	0.837	0.724	88	76.1	105.1	16	21.53	14.9		High	High	High	High	High	High	High	High	High	High	High	High	High	High	High	High	High	High	High	High	High	High	High	High	High	High
	FALSE	High	[R].EEGFILLDEVQSNYEK.[N]	1xTMTpro [N-Term]; 1xDeamidated [N/Q]; 1xTMTpro [K16]	FALSE	1	1	6	A0A7R8YUM2	A0A7R8YUM2 [1278-1293]		0	2522.32	1.213	0.871	0.718	92.4	76.2	106.1	14.75	16	17.27		High	High	High	High	High	High	High	High	High	High	High	High	High	High	High	High	High	High	High	High	High	High	High	High	High	High
	FALSE	High	[R].EEGFILLDEVQSNYEK.[N]	1xTMTpro [N-Term]; 2xDeamidated [Q11; N13]; 1xTMTpro [K16]	FALSE	1	1	1	A0A7R8YUM2	A0A7R8YUM2 [1278-1293]		0	2523.3	1.227	1.089	0.887	102	83.1	93.6	6.26	11.78	17.08		n/a	n/a	n/a	n/a	n/a	n/a	n/a	n/a	High	High	High	High	n/a	n/a	n/a	n/a	n/a	n/a	n/a	n/a	High	High	High	High	n/a	n/a
	FALSE	High	[R].YVFVPQSNGSDLSENPEK.[A]	1xTMTpro [N-Term]; 1xTMTpro [K18]	FALSE	1	1	5	A0A7R8YUM2	A0A7R8YUM2 [1142-1159]		0	2618.36	0.985	1.056	1.072	92	93.4	87.1	24.65	20.38	28.43		High	High	High	High	High	High	High	High	High	High	High	High	High	High	High	High	High	High	High	High	High	High	High	High	High	High
	FALSE	High	[R].YVFVPQSNGSDLSENPEK.[A]	1xTMTpro [N-Term]; 1xDeamidated [N/Q]; 1xTMTpro [K18]	FALSE	1	1	15	A0A7R8YUM2	A0A7R8YUM2 [1142-1159]		0	2619.34	1.431	1.215	0.849	102.4	71.5	84.2	51.67	48.84	60.02		High	High	High	High	High	High	High	High	High	High	High	High	High	High	High	High	High	High	High	High	High	High	High	High	High	High
	FALSE	High	[R].YVFVPQSNGSDLSENPEK.[A]	1xTMTpro [N-Term]; 2xDeamidated [Q6; N8]; 1xTMTpro [K18]	FALSE	1	1	6	A0A7R8YUM2	A0A7R8YUM2 [1142-1159]		0	2620.33	1.66	1.446	0.871	121.5	73.2	84.1	54.58	19.59	38.07		High	High	High	High	High	High	High	High	High	High	High	High	High	High	High	High	High	High	High	High	High	High	High	High	High	High
	FALSE	High	[K].SLATTCVASR.[N]	1xTMTpro [N-Term]; 1xCarbamidomethyl [C6]	FALSE	1	1	3	A0A7R8YUM2	A0A7R8YUM2 [1540-1549]		0	1369.74	0.752	0.77	1.024	76.3	101.4	99.1	34.22	18.77	2.33		High	High	High	High	High	High	High	High	High	High	High	High	High	High	High	High	High	High	High	High	High	High	High	High	High	High
	FALSE	High	[R].GYDYSGMFR.[G]	1xTMTpro [N-Term]	FALSE	1	1	12	A0A7R8YUM2	A0A7R8YUM2 [1023-1031]		0	1399.66	1.281	0.932	0.727	91.8	71.7	98.5	10.11	17.83	6.96		High	High	High	High	High	High	High	High	High	High	High	High	High	High	High	High	High	High	High	High	High	High	High	High	High	High
	FALSE	High	[R].SGTQLPPSLER.[Y]	1xTMTpro [N-Term]	FALSE	1	1	9	A0A7R8YUM2	A0A7R8YUM2 [1131-1141]		0	1488.83	1.089	0.991	0.909	97.9	89.9	98.9	25.19	14.75	10.62		High	High	High	High	High	High	High	High	High	High	High	High	High	High	High	High	High	High	High	High	High	High	High	High	High	High
	FALSE	High	[K].SIQDTDLAK.[G]	1xTMTpro [N-Term]; 1xTMTpro [K9]	FALSE	1	1	2	A0A7R8YUM2	A0A7R8YUM2 [641-649]		0	1598.92	0.949	0.979	1.032	97.6	102.8	99.6	13.78	2.07	19.68		High	High	High	High	High	High	High	High	n/a	n/a	n/a	n/a	High	High	High	High	High	High	High	High	n/a	n/a	n/a	n/a	High	High
	FALSE	High	[K].EELPLNPLEK.[D]	1xTMTpro [N-Term]; 1xTMTpro [K10]	FALSE	1	1	3	A0A7R8YUM2	A0A7R8YUM2 [994-1003]		0	1790.06	0.663	1.235	1.864	117	176.6	94.8	45.58	56.87	11.8		High	High	High	High	High	High	High	High	High	High	High	High	High	High	High	High	High	High	High	High	High	High	High	High	High	High
	FALSE	High	[R].LPESSSIDEFK.[K]	1xTMTpro [N-Term]; 1xTMTpro [K11]	FALSE	1	1	4	A0A7R8YUM2	A0A7R8YUM2 [43-53]		0	1860.02	1.667	0.553	0.332	58	34.8	104.9	41.81	88.96	17.18		High	High	High	High	High	High	High	High	High	High	High	High	High	High	High	High	High	High	High	High	High	High	High	High	High	High
	FALSE	High	[R].LPESSSIDEFKK.[N]	1xTMTpro [N-Term]; 2xTMTpro [K11; K12]	FALSE	1	1	1	A0A7R8YUM2	A0A7R8YUM2 [43-54]		1	2292.33	1.627	0.479	0.295	48.3	29.7	100.9	56.76	107.37	22.8		n/a	n/a	n/a	n/a	n/a	n/a	n/a	n/a	High	High	High	High	n/a	n/a	n/a	n/a	n/a	n/a	n/a	n/a	High	High	High	High	n/a	n/a
	FALSE	High	[R].TILTEDDSVSMIVDILK.[G]	1xTMTpro [N-Term]; 1xTMTpro [K17]	FALSE	1	1	28	A0A7R8YUM2	A0A7R8YUM2 [2396-2412]		0	2500.41	1.446	0.914	0.632	91	62.9	99.6	32.99	29.27	23.79		High	High	High	High	High	High	High	High	High	High	High	High	High	High	High	High	High	High	High	High	High	High	High	High	High	High
	FALSE	High	[R].TILTEDDSVSMIVDILK.[G]	1xTMTpro [N-Term]; 1xOxidation [M11]; 1xTMTpro [K17]	FALSE	1	1	6	A0A7R8YUM2	A0A7R8YUM2 [2396-2412]		0	2516.4	1.484	0.916	0.618	90.3	60.9	98.5	25.19	18.77	24.54		High	High	High	High	High	High	High	High	High	High	High	High	High	High	High	High	High	High	High	High	High	High	High	High	High	High
	FALSE	High	[K].FGSENQSGETLVDVNLSK.[D]	1xTMTpro [N-Term]; 1xTMTpro [K18]	FALSE	1	1	3	A0A7R8YUM2	A0A7R8YUM2 [879-896]		0	2532.34	0.85	1.152	1.355	117.1	137.8	101.7	16.08	10.34	17.25		High	High	High	High	High	High	High	High	n/a	n/a	n/a	n/a	High	High	High	High	High	High	High	High	n/a	n/a	n/a	n/a	High	High
	FALSE	High	[K].FGSENQSGETLVDVNLSK.[D]	1xTMTpro [N-Term]; 1xDeamidated [N]; 1xTMTpro [K18]	FALSE	1	1	2	A0A7R8YUM2	A0A7R8YUM2 [879-896]		0	2533.33	0.919	1.036	1.128	104.9	114.2	101.2	7.02	4.63	10.57		High	High	High	High	n/a	n/a	n/a	n/a	High	High	High	High	High	High	High	High	n/a	n/a	n/a	n/a	High	High	High	High	High	High
	FALSE	High	[R].LLLETTHEAIIDAGVNPQDIR.[G]	1xTMTpro [N-Term]	FALSE	1	1	28	A0A7R8YUM2	A0A7R8YUM2 [113-133]		0	2622.44	1.184	0.927	0.784	92.2	77.9	99.4	4.73	9.9	10.98		High	High	High	High	High	High	High	High	High	High	High	High	High	High	High	High	High	High	High	High	High	High	High	High	High	High
	FALSE	High	[R].LLLETTHEAIIDAGVNPQDIR.[G]	1xTMTpro [N-Term]; 1xDeamidated [N16]	FALSE	1	1	1	A0A7R8YUM2	A0A7R8YUM2 [113-133]		0	2623.43										No Quan Values	n/a	n/a	n/a	n/a	n/a	n/a	n/a	n/a	High	High	High	High	n/a	n/a	n/a	n/a	n/a	n/a	n/a	n/a	High	High	High	High	n/a	n/a
	FALSE	High	[K].LAADALPGDLAQQDCVLGLEFAGR.[D]	1xTMTpro [N-Term]; 1xCarbamidomethyl [C15]	FALSE	1	1	11	A0A7R8YUM2	A0A7R8YUM2 [1502-1525]		0	2804.46	1.072	0.799	0.745	80.8	75.3	101.1	5.58	6.78	14.65		High	High	High	High	High	High	High	High	High	High	High	High	High	High	High	High	High	High	High	High	High	High	High	High	High	High
	FALSE	High	[K].LAADALPGDLAQQDCVLGLEFAGR.[D]	1xTMTpro [N-Term]; 1xDeamidated [Q]; 1xCarbamidomethyl [C15]	FALSE	1	1	6	A0A7R8YUM2	A0A7R8YUM2 [1502-1525]		0	2805.44	2.137	1.849	0.865	184.2	86.2	99.7	19.93	24.6	23.47		High	High	High	High	High	High	High	High	High	High	High	High	High	High	High	High	High	High	High	High	High	High	High	High	High	High
	FALSE	High	[R].GVQVAIDTNDVTTSEGCKK.[L]	1xTMTpro [N-Term]; 1xCarbamidomethyl [C17]; 2xTMTpro [K18; K19]	FALSE	1	1	3	A0A7R8YUM2	A0A7R8YUM2 [1854-1872]		1	2934.6	1.259	0.479	0.381	54.7	43.5	114.1	21.09	32.61	38.37		High	High	High	High	High	High	High	High	High	High	High	High	High	High	High	High	High	High	High	High	High	High	High	High	High	High
	FALSE	High	[R].ETYEEIGLNPAEVVYVEAHGTGTK.[V]	1xTMTpro [N-Term]; 1xTMTpro [K24]	FALSE	1	1	3	A0A7R8YUM2	A0A7R8YUM2 [307-330]		0	3214.68	1.297	0.96	0.74	91.9	70.8	95.7	20.75	19.98	17.06		High	High	High	High	n/a	n/a	n/a	n/a	High	High	High	High	High	High	High	High	n/a	n/a	n/a	n/a	High	High	High	High	High	High
	FALSE	High	[K].FGSENQSGETLVDVNLSKDEDAFLAGHNIDGR.[I]	1xTMTpro [N-Term]; 1xTMTpro [K18]	FALSE	1	1	15	A0A7R8YUM2	A0A7R8YUM2 [879-910]		1	4043.02	1.584	0.923	0.582	92.5	58.4	100.3	39.63	45.64	13.04		High	High	High	High	High	High	High	High	High	High	High	High	High	High	High	High	High	High	High	High	High	High	High	High	High	High
	FALSE	High	[K].FGSENQSGETLVDVNLSKDEDAFLAGHNIDGR.[I]	1xTMTpro [N-Term]; 1xDeamidated [N]; 1xTMTpro [K18]	FALSE	1	1	10	A0A7R8YUM2	A0A7R8YUM2 [879-910]		1	4044.01	1.402	0.938	0.669	92.6	66	98.7	24.79	28.81	9.86		High	High	High	High	High	High	High	High	High	High	High	High	High	High	High	High	High	High	High	High	High	High	High	High	High	High
	FALSE	High	[K].FGSENQSGETLVDVNLSKDEDAFLAGHNIDGR.[I]	1xTMTpro [N-Term]; 2xDeamidated [N5; N15]; 1xTMTpro [K18]	FALSE	1	1	4	A0A7R8YUM2	A0A7R8YUM2 [879-910]		1	4044.99										No Quan Values	High	High	High	High	High	High	High	High	High	High	High	High	High	High	High	High	High	High	High	High	High	High	High	High	High	High
	FALSE	High	[K].FGSENQSGETLVDVNLSKDEDAFLAGHNIDGR.[I]	1xTMTpro [N-Term]; 3xDeamidated [Q6; N15; N28]; 1xTMTpro [K18]	FALSE	1	1	2	A0A7R8YUM2	A0A7R8YUM2 [879-910]		1	4045.98										No Quan Values	n/a	n/a	n/a	n/a	High	High	High	High	High	High	High	High	n/a	n/a	n/a	n/a	High	High	High	High	High	High	High	High	n/a	n/a
	FALSE	High	[R].IYSTILNVR.[T]	1xTMTpro [N-Term]	FALSE	1	1	2	A0A7R8YUM2	A0A7R8YUM2 [274-282]		0	1382.83	0.751	0.989	1.317	91.6	121.9	92.6	23.84	39.58	19.97		High	High	High	High	High	High	High	High	n/a	n/a	n/a	n/a	High	High	High	High	High	High	High	High	n/a	n/a	n/a	n/a	High	High
	FALSE	High	[R].LNMLSPDGTCR.[A]	1xTMTpro [N-Term]; 1xCarbamidomethyl [C10]	FALSE	1	1	2	A0A7R8YUM2	A0A7R8YUM2 [235-245]		0	1567.79	1.094	0.688	0.629	67.3	61.5	97.8	12.85	16.13	10.97		High	High	High	High	n/a	n/a	n/a	n/a	High	High	High	High	High	High	High	High	n/a	n/a	n/a	n/a	High	High	High	High	High	High
	FALSE	High	[K].DLMGLEVFNK.[S]	1xTMTpro [N-Term]; 1xTMTpro [K10]	FALSE	1	1	5	A0A7R8YUM2	A0A7R8YUM2 [541-550]		0	1774.01	1.116	0.927	0.831	99	88.7	106.7	56.64	50.25	50.47		High	High	High	High	High	High	High	High	High	High	High	High	High	High	High	High	High	High	High	High	High	High	High	High	High	High
	FALSE	High	[R].MYFIQNPSAEK.[F]	1xTMTpro [N-Term]; 1xTMTpro [K11]	FALSE	1	1	5	A0A7R8YUM2	A0A7R8YUM2 [1390-1400]		0	1936.05	0.858	0.926	1.079	92.3	107.5	99.6	16.87	11.55	13.64		High	High	High	High	High	High	High	High	High	High	High	High	High	High	High	High	High	High	High	High	High	High	High	High	High	High
	FALSE	High	[R].YHDNNLEFLLTNVGK.[L]	1xTMTpro [N-Term]; 1xTMTpro [K15]	FALSE	1	1	2	A0A7R8YUM2	A0A7R8YUM2 [820-834]		0	2385.31	0.998	1.114	1.116	110	110.2	98.7	21.65	41.6	23.57		High	High	High	High	n/a	n/a	n/a	n/a	High	High	High	High	High	High	High	High	n/a	n/a	n/a	n/a	High	High	High	High	High	High
	FALSE	High	[K].VGDPQEVNSITDFFCK.[D]	1xTMTpro [N-Term]; 1xCarbamidomethyl [C15]; 1xTMTpro [K16]	FALSE	1	1	4	A0A7R8YUM2	A0A7R8YUM2 [331-346]		0	2464.27	0.876	0.595	0.679	62.4	71.2	104.9	21.58	22.16	20.68		High	High	High	High	High	High	High	High	High	High	High	High	High	High	High	High	High	High	High	High	High	High	High	High	High	High
	FALSE	High	[R].WISSSIPESAWNTPIAK.[Q]	1xTMTpro [N-Term]; 1xTMTpro [K17]	FALSE	1	1	16	A0A7R8YUM2	A0A7R8YUM2 [744-760]		0	2495.38	1.4	1.014	0.725	106.1	75.8	104.6	30.33	26.09	11.49		High	High	High	High	High	High	High	High	High	High	High	High	High	High	High	High	High	High	High	High	High	High	High	High	High	High
	FALSE	High	[R].WISSSIPESAWNTPIAK.[Q]	1xTMTpro [N-Term]; 1xDeamidated [N12]; 1xTMTpro [K17]	FALSE	1	1	2	A0A7R8YUM2	A0A7R8YUM2 [744-760]		0	2496.36	1.093	0.987	0.902	99.7	91.2	101	15.83	14.03	3.77		n/a	n/a	n/a	n/a	n/a	n/a	n/a	n/a	High	High	High	High	n/a	n/a	n/a	n/a	n/a	n/a	n/a	n/a	High	High	High	High	n/a	n/a
	FALSE	High	[K].VLIAMEEGVIPANLHYK.[N]	1xTMTpro [N-Term]; 1xTMTpro [K17]	FALSE	1	1	3	A0A7R8YUM2	A0A7R8YUM2 [376-392]		0	2505.44	0.945	1.123	1.188	107.1	113.3	95.3	26.26	30.04	9.04		High	High	High	High	High	High	High	High	High	High	High	High	High	High	High	High	High	High	High	High	High	High	High	High	High	High
	FALSE	High	[R].GVDLVLNSLADEKLQASVR.[C]	1xTMTpro [N-Term]; 1xTMTpro [K13]	FALSE	1	1	4	A0A7R8YUM2	A0A7R8YUM2 [1659-1677]		1	2635.53	1.099	1.322	1.204	130.4	118.7	98.6	13.38	16.05	11.49		High	High	High	High	High	High	High	High	High	High	High	High	High	High	High	High	High	High	High	High	High	High	High	High	High	High
	FALSE	High	[K].NGAVRPLPTTVFNEQQVEQAFR.[F]	1xTMTpro [N-Term]	FALSE	1	1	2	A0A7R8YUM2	A0A7R8YUM2 [1739-1760]		0	2805.5	1.198	1.214	1.013	110.6	92.3	91.1	25.47	44.77	22.05		High	High	High	High	n/a	n/a	n/a	n/a	High	High	High	High	High	High	High	High	n/a	n/a	n/a	n/a	High	High	High	High	High	High
	FALSE	High	[K].NGAVRPLPTTVFNEQQVEQAFR.[F]	1xDeamidated [N]; 1xTMTpro [N-Term]	FALSE	1	1	4	A0A7R8YUM2	A0A7R8YUM2 [1739-1760]		0	2806.48	1.125	0.999	0.888	87.1	77.4	87.1	20.66	39.98	32.18		High	High	High	High	High	High	High	High	High	High	High	High	High	High	High	High	High	High	High	High	High	High	High	High	High	High
	FALSE	High	[K].LETSGDTPTLQVEHAYINAITK.[G]	1xTMTpro [N-Term]; 1xTMTpro [K22]	FALSE	1	1	3	A0A7R8YUM2	A0A7R8YUM2 [1434-1455]		0	3009.64	1.017	1.363	1.341	129.5	127.4	95	25.53	38.6	25.06		High	High	High	High	High	High	High	High	High	High	High	High	High	High	High	High	High	High	High	High	High	High	High	High	High	High
	FALSE	High	[K].LETSGDTPTLQVEHAYINAITK.[G]	1xTMTpro [N-Term]; 1xDeamidated [N18]; 1xTMTpro [K22]	FALSE	1	1	1	A0A7R8YUM2	A0A7R8YUM2 [1434-1455]		0	3010.62	1.139	1.19	1.045	119.9	105.3	100.8	13.62	16.48	4.45		High	High	High	High	n/a	n/a	n/a	n/a	n/a	n/a	n/a	n/a	High	High	High	High	n/a	n/a	n/a	n/a	n/a	n/a	n/a	n/a	High	High
	FALSE	High	[K].IKDEDLEQFDQQFFNVHQK.[Q]	1xTMTpro [N-Term]; 2xTMTpro [K2; K19]	FALSE	1	1	3	A0A7R8YUM2	A0A7R8YUM2 [84-102]		1	3320.77	0.912	0.795	0.872	77	84.5	96.9	35.55	73.49	36.78		High	High	High	High	High	High	High	High	High	High	High	High	High	High	High	High	High	High	High	High	High	High	High	High	High	High
	FALSE	High	[K].IKDEDLEQFDQQFFNVHQK.[Q]	1xTMTpro [N-Term]; 2xTMTpro [K2; K19]; 1xDeamidated [Q11]	FALSE	1	1	1	A0A7R8YUM2	A0A7R8YUM2 [84-102]		1	3321.76	2.925	1.451	0.496	129.4	44.2	89.1	54.92	15.38	62.28		n/a	n/a	n/a	n/a	n/a	n/a	n/a	n/a	High	High	High	High	n/a	n/a	n/a	n/a	n/a	n/a	n/a	n/a	High	High	High	High	n/a	n/a
	FALSE	High	[K].IKDEDLEQFDQQFFNVHQK.[Q]	1xTMTpro [N-Term]; 2xTMTpro [K2; K19]; 2xDeamidated [Q]	FALSE	1	1	3	A0A7R8YUM2	A0A7R8YUM2 [84-102]		1	3322.74	2.322	1.792	0.772	176.2	75.9	98.3	46.64	11.39	23.74		n/a	n/a	n/a	n/a	High	High	High	High	n/a	n/a	n/a	n/a	n/a	n/a	n/a	n/a	High	High	High	High	n/a	n/a	n/a	n/a	n/a	n/a
	FALSE	High	[R].NADSLLAQNILGIIEGEPTLASDVVVASAK.[N]	1xTMTpro [N-Term]; 1xDeamidated [N/Q]; 1xTMTpro [K30]	FALSE	1	1	2	A0A7R8YUM2	A0A7R8YUM2 [1192-1221]		0	3618.01	1.125	0.991	0.881	100.7	89.5	101.6	23.05	13.98	34.57		High	High	High	High	n/a	n/a	n/a	n/a	n/a	n/a	n/a	n/a	High	High	High	High	n/a	n/a	n/a	n/a	n/a	n/a	n/a	n/a	High	High
	FALSE	High	[K].LETSGDTPTLQVEHAYINAITKGDLSSLK.[W]	1xTMTpro [N-Term]; 2xTMTpro [K22; K29]	FALSE	1	1	1	A0A7R8YUM2	A0A7R8YUM2 [1434-1462]		1	4014.22	1.1	1.106	1.005	113	102.7	102.1	15.61	6.44	10.75		High	High	High	High	n/a	n/a	n/a	n/a	n/a	n/a	n/a	n/a	High	High	High	High	n/a	n/a	n/a	n/a	n/a	n/a	n/a	n/a	High	High
	FALSE	High	[K].LETSGDTPTLQVEHAYINAITKGDLSSLK.[W]	1xTMTpro [N-Term]; 1xDeamidated [N18]; 2xTMTpro [K22; K29]	FALSE	1	1	1	A0A7R8YUM2	A0A7R8YUM2 [1434-1462]		1	4015.21										No Quan Values	n/a	n/a	n/a	n/a	High	High	High	High	n/a	n/a	n/a	n/a	n/a	n/a	n/a	n/a	High	High	High	High	n/a	n/a	n/a	n/a	n/a	n/a
	FALSE	High	[R].QASGFPGTAIQWGAIGDTGLVIENLGDNDTVIGGTLPQR.[M]	1xTMTpro [N-Term]	FALSE	1	1	2	A0A7R8YUM2	A0A7R8YUM2 [1967-2005]		0	4243.2	0.836	1.04	1.244	103.6	123.9	99.6	19.82	8.03	7.69		n/a	n/a	n/a	n/a	High	High	High	High	High	High	High	High	n/a	n/a	n/a	n/a	High	High	High	High	High	High	High	High	n/a	n/a
	FALSE	High	[K].LSAAGVFAK.[A]	1xTMTpro [N-Term]; 1xTMTpro [K9]	FALSE	1	1	4	A0A7R8YUM2	A0A7R8YUM2 [697-705]		0	1471.91	0.632	0.964	1.525	87.2	138	90.5	30.41	51.47	33.71		High	High	High	High	High	High	High	High	High	High	High	High	High	High	High	High	High	High	High	High	High	High	High	High	High	High
	FALSE	High	[K].TPLLIGSVK.[S]	1xTMTpro [N-Term]; 1xTMTpro [K9]	FALSE	1	1	1	A0A7R8YUM2	A0A7R8YUM2 [350-358]		0	1536	2.202	1.134	0.515	112.2	51	99	55.66	64.06	7.73		n/a	n/a	n/a	n/a	High	High	High	High	n/a	n/a	n/a	n/a	n/a	n/a	n/a	n/a	High	High	High	High	n/a	n/a	n/a	n/a	n/a	n/a
	FALSE	High	[K].NLIVVSTQK.[V]	1xTMTpro [N-Term]; 1xTMTpro [K9]	FALSE	1	1	9	A0A7R8YUM2	A0A7R8YUM2 [1302-1310]		0	1610.01	1.248	0.98	0.785	95	76.1	96.9	25.12	25.06	10.81		High	High	High	High	High	High	High	High	High	High	High	High	High	High	High	High	High	High	High	High	High	High	High	High	High	High
	FALSE	High	[R].ALGGGATSLSLIK.[R]	1xTMTpro [N-Term]; 1xTMTpro [K13]	FALSE	1	1	2	A0A7R8YUM2	A0A7R8YUM2 [806-818]		0	1796.11	0.76	1.09	1.435	109	143.4	99.9	13.54	33.72	11.45		High	High	High	High	High	High	High	High	n/a	n/a	n/a	n/a	High	High	High	High	High	High	High	High	n/a	n/a	n/a	n/a	High	High
	FALSE	High	[K].LFAAGAQPNVSK.[L]	1xTMTpro [N-Term]; 1xTMTpro [K12]	FALSE	1	1	12	A0A7R8YUM2	A0A7R8YUM2 [835-846]		0	1811.07	1.275	0.811	0.637	78.9	61.9	97.3	37.58	41.87	13.99		High	High	High	High	High	High	High	High	High	High	High	High	High	High	High	High	High	High	High	High	High	High	High	High	High	High
	FALSE	High	[K].KVVIQLTEK.[N]	1xTMTpro [N-Term]; 2xTMTpro [K1; K9]	FALSE	1	1	3	A0A7R8YUM2	A0A7R8YUM2 [1330-1338]		1	1970.28	1.043	1.042	1	107.2	102.8	102.9	21.27	24.87	19.72		High	High	High	High	High	High	High	High	High	High	High	High	High	High	High	High	High	High	High	High	High	High	High	High	High	High
	FALSE	High	[K].SVTLIKPTENYAK.[L]	1xTMTpro [N-Term]; 2xTMTpro [K6; K13]	FALSE	1	1	1	A0A7R8YUM2	A0A7R8YUM2 [2358-2370]		0	2376.43	0.494	0.932	1.886	82.8	167.7	88.9	48.64	63.2	48.93		n/a	n/a	n/a	n/a	High	High	High	High	n/a	n/a	n/a	n/a	n/a	n/a	n/a	n/a	High	High	High	High	n/a	n/a	n/a	n/a	n/a	n/a
	FALSE	High	[R].QLTFGALKELEGSAGGTVSPAPVSPSK.[S]	1xTMTpro [N-Term]; 2xTMTpro [K8; K27]	FALSE	1	1	1	A0A7R8YUM2	A0A7R8YUM2 [2097-2123]		1	3541.01	1.506	1.133	0.752	114.3	75.9	100.9	30.65	70.91	17.59		n/a	n/a	n/a	n/a	n/a	n/a	n/a	n/a	High	High	High	High	n/a	n/a	n/a	n/a	n/a	n/a	n/a	n/a	High	High	High	High	n/a	n/a
	FALSE	High	[R].QLTFGALKELEGSAGGTVSPAPVSPSK.[S]	1xDeamidated [Q1]; 1xTMTpro [N-Term]; 2xTMTpro [K8; K27]	FALSE	1	1	3	A0A7R8YUM2	A0A7R8YUM2 [2097-2123]		1	3541.99	1.366	1.213	0.888	105.8	77.4	87.2	34.13	68.77	29.6		High	High	High	High	High	High	High	High	High	High	High	High	High	High	High	High	High	High	High	High	High	High	High	High	High	High
	FALSE	High	[R].TYMHPEKTYIVVGGLGGFGLELSHWMVSR.[G]	1xTMTpro [N-Term]; 1xTMTpro [K7]	FALSE	1	1	1	A0A7R8YUM2	A0A7R8YUM2 [1797-1825]		1	3873.05										No Quan Values	High	High	High	High	n/a	n/a	n/a	n/a	n/a	n/a	n/a	n/a	High	High	High	High	n/a	n/a	n/a	n/a	n/a	n/a	n/a	n/a	High	High
	FALSE	High	[K].ILIHAGTGGVGQAAISVALHHGLTVFTTVGSQEK.[R]	1xTMTpro [N-Term]; 1xTMTpro [K34]	FALSE	1	1	1	A0A7R8YUM2	A0A7R8YUM2 [1590-1623]		0	3978.24	0.99	1.105	1.116	111	112.1	100.4	18.21	8.38	6.05		High	High	High	High	n/a	n/a	n/a	n/a	n/a	n/a	n/a	n/a	High	High	High	High	n/a	n/a	n/a	n/a	n/a	n/a	n/a	n/a	High	High
	FALSE	High	[R].TVDAVQDLLEDAEAHK.[D]	1xTMTpro [N-Term]; 1xTMTpro [K16]	FALSE	1	1	2	A0A7R8YUM2	A0A7R8YUM2 [461-476]		0	2362.27	0.839	1.233	1.469	131.8	157.1	106.9	31.02	12.07	24.04		n/a	n/a	n/a	n/a	High	High	High	High	High	High	High	High	n/a	n/a	n/a	n/a	High	High	High	High	High	High	High	High	n/a	n/a
	FALSE	High	[K].NALESTEEQNEAYALAYFGMVLGNMDYGGVAR.[L]	1xTMTpro [N-Term]	FALSE	1	1	1	A0A7R8YUM2	A0A7R8YUM2 [2271-2302]		0	3787.79	1.205	1.197	0.994	113.4	94.2	94.7	13.79	10.64	13.03		n/a	n/a	n/a	n/a	High	High	High	High	n/a	n/a	n/a	n/a	n/a	n/a	n/a	n/a	High	High	High	High	n/a	n/a	n/a	n/a	n/a	n/a
	FALSE	High	[K].SNAPNDSK.[K]	1xTMTpro [N-Term]; 1xTMTpro [K8]	FALSE	1	1	11	A0A7R8YUM2	A0A7R8YUM2 [2152-2159]		0	1440.79	1.543	1.274	0.825	118.9	77	93.3	50.74	55.06	43.37		High	High	High	High	High	High	High	High	High	High	High	High	High	High	High	High	High	High	High	High	High	High	High	High	High	High
	FALSE	High	[K].DLMGLEVFNK.[S]	1xTMTpro [N-Term]; 1xOxidation [M3]; 1xTMTpro [K10]	FALSE	1	1	3	A0A7R8YUM2	A0A7R8YUM2 [541-550]		0	1790	1.203	1.117	0.928	114.6	95.3	102.6	41.24	43.12	47.96		High	High	High	High	High	High	High	High	High	High	High	High	High	High	High	High	High	High	High	High	High	High	High	High	High	High
	FALSE	High	[R].MYFIQNPSAEK.[F]	1xTMTpro [N-Term]; 1xDeamidated [Q5]; 1xTMTpro [K11]	FALSE	1	1	1	A0A7R8YUM2	A0A7R8YUM2 [1390-1400]		0	1937.03	0.911	0.872	0.958	84.8	93.1	97.2	21.18	10.36	12.52		n/a	n/a	n/a	n/a	n/a	n/a	n/a	n/a	High	High	High	High	n/a	n/a	n/a	n/a	n/a	n/a	n/a	n/a	High	High	High	High	n/a	n/a
	FALSE	High	[R].MYFIQNPSAEK.[F]	1xOxidation [M1]; 1xTMTpro [N-Term]; 1xTMTpro [K11]	FALSE	1	1	4	A0A7R8YUM2	A0A7R8YUM2 [1390-1400]		0	1952.04	1.05	0.884	0.842	88.3	84.1	99.9	12.85	15.01	7.23		High	High	High	High	n/a	n/a	n/a	n/a	High	High	High	High	High	High	High	High	n/a	n/a	n/a	n/a	High	High	High	High	High	High
	FALSE	High	[K].VGDPQEVNSITDFFCK.[D]	1xTMTpro [N-Term]; 1xDeamidated [N8]; 1xCarbamidomethyl [C15]; 1xTMTpro [K16]	FALSE	1	1	1	A0A7R8YUM2	A0A7R8YUM2 [331-346]		0	2465.25										No Quan Values	High	High	High	High	n/a	n/a	n/a	n/a	n/a	n/a	n/a	n/a	High	High	High	High	n/a	n/a	n/a	n/a	n/a	n/a	n/a	n/a	High	High
	FALSE	High	[R].IMAMVTAK.[S]	1xTMTpro [N-Term]; 1xTMTpro [K8]	FALSE	1	1	6	A0A7R8YUM2	A0A7R8YUM2 [1532-1539]		0	1472.88	1.043	0.884	0.848	78.4	75.2	88.7	18.87	19.92	32.17		High	High	High	High	High	High	High	High	High	High	High	High	High	High	High	High	High	High	High	High	High	High	High	High	High	High
	FALSE	High	[R].GYSVVTNK.[S]	1xTMTpro [N-Term]; 1xTMTpro [K8]	FALSE	1	1	3	A0A7R8YUM2	A0A7R8YUM2 [500-507]		0	1475.87	1.46	1.153	0.789	115.5	79.1	100.2	24.88	24.57	9.13		High	High	High	High	High	High	High	High	High	High	High	High	High	High	High	High	High	High	High	High	High	High	High	High	High	High
	FALSE	High	[K].VVIQLTEK.[N]	1xTMTpro [N-Term]; 1xTMTpro [K8]	FALSE	1	1	5	A0A7R8YUM2	A0A7R8YUM2 [1331-1338]		0	1537.98	1.234	0.688	0.558	69	55.9	100.2	17.42	29.37	13.2		High	High	High	High	High	High	High	High	High	High	High	High	High	High	High	High	High	High	High	High	High	High	High	High	High	High
	FALSE	High	[K].NPNPDLYGLIEGK.[L]	1xTMTpro [N-Term]; 1xTMTpro [K13]	FALSE	1	1	2	A0A7R8YUM2	A0A7R8YUM2 [393-405]		0	2038.15	1.023	0.975	0.953	98	95.8	100.5	23.4	45.14	10.73		n/a	n/a	n/a	n/a	High	High	High	High	High	High	High	High	n/a	n/a	n/a	n/a	High	High	High	High	High	High	High	High	n/a	n/a
	FALSE	High	[R].QLTFGALK.[E]	1xTMTpro [N-Term]; 1xTMTpro [K8]	FALSE	1	1	3	A0A7R8YUM2	A0A7R8YUM2 [2097-2104]		0	1485.93	0.816	0.494	0.605	39.8	48.8	80.7	21	57.84	63.81		High	High	High	High	High	High	High	High	High	High	High	High	High	High	High	High	High	High	High	High	High	High	High	High	High	High
	FALSE	High	[R].ISFTFDFK.[G]	1xTMTpro [N-Term]; 1xTMTpro [K8]	FALSE	1	1	5	A0A7R8YUM2	A0A7R8YUM2 [176-183]		0	1612.92	0.786	0.637	0.811	60.2	76.6	94.5	6.99	10.51	18.11		High	High	High	High	High	High	High	High	High	High	High	High	High	High	High	High	High	High	High	High	High	High	High	High	High	High
	FALSE	High	[K].VGWDHSQR.[W]	1xTMTpro [N-Term]	FALSE	1	1	4	A0A7R8YUM2	A0A7R8YUM2 [866-873]		0	1288.67	1.183	0.914	0.773	89.4	75.6	97.8	24.06	16.54	13.66		High	High	High	High	High	High	High	High	High	High	High	High	High	High	High	High	High	High	High	High	High	High	High	High	High	High
	FALSE	High	[K].SAGWGTFR.[H]	1xTMTpro [N-Term]	FALSE	1	1	7	A0A7R8YUM2	A0A7R8YUM2 [1423-1430]		0	1185.63	0.804	0.754	0.937	76.3	94.9	101.2	25.92	19.99	8.57		High	High	High	High	High	High	High	High	High	High	High	High	High	High	High	High	High	High	High	High	High	High	High	High	High	High
	FALSE	High	[K].SLPVYMYK.[D]	1xTMTpro [N-Term]; 1xTMTpro [K8]	FALSE	1	1	4	A0A7R8YUM2	A0A7R8YUM2 [1100-1107]		0	1608.93	0.795	0.991	1.248	95.6	120.3	96.5	22.1	43.27	16.85		High	High	High	High	High	High	High	High	High	High	High	High	High	High	High	High	High	High	High	High	High	High	High	High	High	High
	FALSE	High	[K].SNAPNDSK.[K]	1xTMTpro [N-Term]; 1xDeamidated [N5]; 1xTMTpro [K8]	FALSE	1	1	4	A0A7R8YUM2	A0A7R8YUM2 [2152-2159]		0	1441.78	1.375	1.269	0.923	125.4	91.2	98.8	36.99	39.13	30.79		High	High	High	High	High	High	High	High	High	High	High	High	High	High	High	High	High	High	High	High	High	High	High	High	High	High
	FALSE	High	[K].FYQEQLNK.[D]	1xTMTpro [N-Term]; 1xTMTpro [K8]	FALSE	1	1	2	A0A7R8YUM2	A0A7R8YUM2 [1407-1414]		0	1677.95	0.84	0.571	0.679	60.8	72.4	106.6	12.6	15.35	17.04		High	High	High	High	n/a	n/a	n/a	n/a	High	High	High	High	High	High	High	High	n/a	n/a	n/a	n/a	High	High	High	High	High	High
	FALSE	High	[R].GYSVVTNK.[S]	1xTMTpro [N-Term]; 1xDeamidated [N7]; 1xTMTpro [K8]	FALSE	1	1	1	A0A7R8YUM2	A0A7R8YUM2 [500-507]		0	1476.86	1.072	1.038	0.969	105.6	98.6	101.7	10.22	3.65	8.03		High	High	High	High	n/a	n/a	n/a	n/a	n/a	n/a	n/a	n/a	High	High	High	High	n/a	n/a	n/a	n/a	n/a	n/a	n/a	n/a	High	High
	FALSE	High	[R].DVMLSSGK.[L]	1xTMTpro [N-Term]; 1xTMTpro [K8]	FALSE	1	1	6	A0A7R8YUM2	A0A7R8YUM2 [1494-1501]		0	1444.83	1.26	0.937	0.743	95.4	75.7	101.9	27.35	28.96	4.94		High	High	High	High	High	High	High	High	High	High	High	High	High	High	High	High	High	High	High	High	High	High	High	High	High	High
	FALSE	High	[K].DLICNVLK.[S]	1xTMTpro [N-Term]; 1xCarbamidomethyl [C4]; 1xTMTpro [K8]	FALSE	1	1	1	A0A7R8YUM2	A0A7R8YUM2 [1415-1422]		0	1582.95	1.124	0.715	0.636	71.5	63.7	100	13.91	10.44	39.52		n/a	n/a	n/a	n/a	n/a	n/a	n/a	n/a	High	High	High	High	n/a	n/a	n/a	n/a	n/a	n/a	n/a	n/a	High	High	High	High	n/a	n/a
	FALSE	High	[K].NLFEGVDMVNDDPR.[R]	2xDeamidated [N1; N10]; 1xTMTpro [N-Term]	FALSE	1	1	1	A0A7R8YUM2	A0A7R8YUM2 [55-68]		0	1926.91										No Quan Values	High	High	High	High	n/a	n/a	n/a	n/a	n/a	n/a	n/a	n/a	High	High	High	High	n/a	n/a	n/a	n/a	n/a	n/a	n/a	n/a	High	High
	FALSE	High	[R].IMAMVTAK.[S]	1xTMTpro [N-Term]; 1xOxidation [M4]; 1xTMTpro [K8]	FALSE	1	1	4	A0A7R8YUM2	A0A7R8YUM2 [1532-1539]		0	1488.88	0.987	0.846	0.857	84.1	85.2	99.4	12.36	8.72	11.72		High	High	High	High	High	High	High	High	High	High	High	High	High	High	High	High	High	High	High	High	High	High	High	High	High	High
	FALSE	High	[R].GTPMLNSK.[V]	1xTMTpro [N-Term]; 1xTMTpro [K8]	FALSE	1	1	2	A0A7R8YUM2	A0A7R8YUM2 [858-865]		0	1455.85	1.342	0.923	0.688	92.5	68.9	100.1	31.92	27.61	5.19		High	High	High	High	High	High	High	High	n/a	n/a	n/a	n/a	High	High	High	High	High	High	High	High	n/a	n/a	n/a	n/a	High	High
	FALSE	High	[K].YIADAGPK.[L]	1xTMTpro [N-Term]; 1xTMTpro [K8]	FALSE	1	1	4	A0A7R8YUM2	A0A7R8YUM2 [718-725]		0	1442.85	1.314	0.959	0.73	97.2	74	101.4	25.25	18.37	15.44		High	High	High	High	High	High	High	High	High	High	High	High	High	High	High	High	High	High	High	High	High	High	High	High	High	High
	FALSE	High	[R].GTPMLNSK.[V]	1xTMTpro [N-Term]; 1xDeamidated [N6]; 1xTMTpro [K8]	FALSE	1	1	2	A0A7R8YUM2	A0A7R8YUM2 [858-865]		0	1456.83	1.578	0.996	0.631	104.1	66	104.5	33.16	33.28	11.44		High	High	High	High	n/a	n/a	n/a	n/a	High	High	High	High	High	High	High	High	n/a	n/a	n/a	n/a	High	High	High	High	High	High
	FALSE	High	[R].TNTDGQK.[E]	1xTMTpro [N-Term]; 1xTMTpro [K7]	FALSE	1	1	6	A0A7R8YUM2	A0A7R8YUM2 [283-289]		0	1371.77	1.189	0.798	0.671	81	68.1	101.5	40.92	18.32	20.61		High	High	High	High	High	High	High	High	High	High	High	High	High	High	High	High	High	High	High	High	High	High	High	High	High	High
	FALSE	High	[K].VTEVVEK.[L]	1xTMTpro [N-Term]; 1xTMTpro [K7]	FALSE	1	1	7	A0A7R8YUM2	A0A7R8YUM2 [690-696]		0	1411.87	1.33	0.963	0.724	95.8	72	99.5	42.14	36.91	16.64		High	High	High	High	High	High	High	High	High	High	High	High	High	High	High	High	High	High	High	High	High	High	High	High	High	High
	FALSE	High	[K].SGLPLSK.[N]	1xTMTpro [N-Term]; 1xTMTpro [K7]	FALSE	1	1	3	A0A7R8YUM2	A0A7R8YUM2 [1006-1012]		0	1309.83	1.226	0.952	0.777	96	78.3	100.9	26.33	37.02	16.03		High	High	High	High	High	High	High	High	High	High	High	High	High	High	High	High	High	High	High	High	High	High	High	High	High	High
	FALSE	High	[K].LLEASNK.[L]	1xTMTpro [N-Term]; 1xTMTpro [K7]	FALSE	1	1	6	A0A7R8YUM2	A0A7R8YUM2 [1873-1879]		0	1382.85	0.982	0.748	0.762	78.4	79.8	104.7	35.68	11.77	20.77		High	High	High	High	High	High	High	High	High	High	High	High	High	High	High	High	High	High	High	High	High	High	High	High	High	High
	FALSE	High	[K].GDLSSLK.[W]	1xTMTpro [N-Term]; 1xTMTpro [K7]	FALSE	1	1	4	A0A7R8YUM2	A0A7R8YUM2 [1456-1462]		0	1327.81	1.292	1.19	0.921	122.3	94.7	102.7	6.37	4.56	16.39		High	High	High	High	High	High	High	High	High	High	High	High	High	High	High	High	High	High	High	High	High	High	High	High	High	High
	FALSE	High	[K].LVTAIPR.[T]	1xTMTpro [N-Term]	FALSE	1	1	5	A0A7R8YUM2	A0A7R8YUM2 [1790-1796]		0	1073.7	0.705	0.397	0.563	40.2	57	101.2	70.18	19.24	17.82		High	High	High	High	High	High	High	High	High	High	High	High	High	High	High	High	High	High	High	High	High	High	High	High	High	High
	FALSE	High	[R].TYMHPEK.[T]	1xTMTpro [N-Term]; 1xTMTpro [K7]	FALSE	1	1	2	A0A7R8YUM2	A0A7R8YUM2 [1797-1803]		0	1513.83	1.004	0.682	0.679	69	68.8	101.3	37.75	20.83	10.26		High	High	High	High	High	High	High	High	n/a	n/a	n/a	n/a	High	High	High	High	High	High	High	High	n/a	n/a	n/a	n/a	High	High
FALSE	High	Master Protein	A0A7R8UHI6	Titin OS=Hermetia illucens OX=343691 GN=HERILL_LOCUS3797 PE=3 SV=1	0	658.748	28	93	267	93	21740	2473.6	5.03	5907	93	0	1.312	1.143	0.872	0.131921	0.655231	0.448177	115.1	87.7	100.6	20.96	7.19	6.21	High	High	High	1	Phospho [T13131; S14300; S17064]
	Checked	Confidence	Annotated Sequence	Modifications	Contaminant	# Protein Groups	# Proteins	# PSMs	Master Protein Accessions	Positions in Master Proteins	Modifications in Master Proteins	# Missed Cleavages	Theo. MH+ [Da]	Abundance Ratio: (10 mM FAC) / (100 mM FAC)	Abundance Ratio: (10 mM FAC) / (CNTRL)	Abundance Ratio: (100 mM FAC) / (CNTRL)	Abundances (Grouped): 10 mM FAC	Abundances (Grouped): 100 mM FAC	Abundances (Grouped): CNTRL	Abundances (Grouped) CV [%]: 10 mM FAC	Abundances (Grouped) CV [%]: 100 mM FAC	Abundances (Grouped) CV [%]: CNTRL	Quan Info	Found in Sample: F1: 128C, Sample, 5, 10 mM FAC	Found in Sample: F1: 129N, Sample, 6, 10 mM FAC	Found in Sample: F1: 129C, Sample, 7, 10 mM FAC	Found in Sample: F1: 130N, Sample, 8, 10 mM FAC	Found in Sample: F2: 128C, Sample, 5, 10 mM FAC	Found in Sample: F2: 129N, Sample, 6, 10 mM FAC	Found in Sample: F2: 129C, Sample, 7, 10 mM FAC	Found in Sample: F2: 130N, Sample, 8, 10 mM FAC	Found in Sample: F3: 128C, Sample, 5, 10 mM FAC	Found in Sample: F3: 129N, Sample, 6, 10 mM FAC	Found in Sample: F3: 129C, Sample, 7, 10 mM FAC	Found in Sample: F3: 130N, Sample, 8, 10 mM FAC	Found in Sample: F1: 130C, Sample, 9, 100 mM FAC	Found in Sample: F1: 131N, Sample, 10, 100 mM FAC	Found in Sample: F1: 131C, Sample, 11, 100 mM FAC	Found in Sample: F1: 132N, Sample, 12, 100 mM FAC	Found in Sample: F2: 130C, Sample, 9, 100 mM FAC	Found in Sample: F2: 131N, Sample, 10, 100 mM FAC	Found in Sample: F2: 131C, Sample, 11, 100 mM FAC	Found in Sample: F2: 132N, Sample, 12, 100 mM FAC	Found in Sample: F3: 130C, Sample, 9, 100 mM FAC	Found in Sample: F3: 131N, Sample, 10, 100 mM FAC	Found in Sample: F3: 131C, Sample, 11, 100 mM FAC	Found in Sample: F3: 132N, Sample, 12, 100 mM FAC	Found in Sample: F1: 126, Control, 1, CNTRL	Found in Sample: F1: 127N, Control, 2, CNTRL
	FALSE	High	[R].DLQDGHEYLIR.[I]	1xTMTpro [N-Term]	FALSE	1	1	3	A0A7R8UHI6	A0A7R8UHI6 [21645-21655]		0	1662.88	1.178	0.896	0.76	90.4	76.8	101	13.2	10.1	14.49		High	High	High	High	High	High	High	High	High	High	High	High	High	High	High	High	High	High	High	High	High	High	High	High	High	High
	FALSE	High	[K].DQEGTYEVIAR.[N]	1xTMTpro [N-Term]	FALSE	1	1	1	A0A7R8UHI6	A0A7R8UHI6 [18241-18251]; [20316-20326]		0	1584.82	1.121	1.267	1.13	132.4	118.1	104.5	14.63	24.66	10.96		n/a	n/a	n/a	n/a	n/a	n/a	n/a	n/a	High	High	High	High	n/a	n/a	n/a	n/a	n/a	n/a	n/a	n/a	High	High	High	High	n/a	n/a
	FALSE	High	[K].VTEEAADEFK.[V]	1xTMTpro [N-Term]; 1xTMTpro [K10]	FALSE	1	1	3	A0A7R8UHI6	A0A7R8UHI6 [16752-16761]; [18939-18948]		0	1746.94	2.622	1.222	0.466	126.2	48.1	103.3	42.73	38.12	26.75		High	High	High	High	High	High	High	High	High	High	High	High	High	High	High	High	High	High	High	High	High	High	High	High	High	High
	FALSE	High	[K].SEDVEEGATIK.[R]	1xTMTpro [N-Term]; 1xTMTpro [K11]	FALSE	1	1	6	A0A7R8UHI6	A0A7R8UHI6 [17678-17688]		0	1785.97	0.676	1.128	1.668	113.5	167.8	100.6	24.97	37.62	18		High	High	High	High	High	High	High	High	High	High	High	High	High	High	High	High	High	High	High	High	High	High	High	High	High	High
	FALSE	High	[K].EQETENVTIK.[K]	1xTMTpro [N-Term]; 1xTMTpro [K10]	FALSE	1	1	3	A0A7R8UHI6	A0A7R8UHI6 [17380-17389]; [19472-19481]		0	1799	1.151	1.191	1.034	120	104.2	100.8	18.78	19.44	14.26		High	High	High	High	High	High	High	High	High	High	High	High	High	High	High	High	High	High	High	High	High	High	High	High	High	High
	FALSE	High	[K].TEEAADELVIK.[K]	1xTMTpro [N-Term]; 1xTMTpro [K11]	FALSE	1	1	3	A0A7R8UHI6	A0A7R8UHI6 [17469-17479]; [17543-17553]; [19561-19571]		0	1826.04	0.55	0.707	1.286	71.8	130.6	101.5	78.36	37.36	22.87		High	High	High	High	High	High	High	High	High	High	High	High	High	High	High	High	High	High	High	High	High	High	High	High	High	High
	FALSE	High	[K].TPEDQVAEEVTIK.[K]	1xTMTpro [N-Term]; 1xTMTpro [K13]	FALSE	1	1	1	A0A7R8UHI6	A0A7R8UHI6 [17270-17282]; [19362-19374]		0	2067.15										No Quan Values	High	High	High	High	n/a	n/a	n/a	n/a	n/a	n/a	n/a	n/a	High	High	High	High	n/a	n/a	n/a	n/a	n/a	n/a	n/a	n/a	High	High
	FALSE	High	[K].AQYVDEGTNVILECR.[L]	1xTMTpro [N-Term]; 1xCarbamidomethyl [C14]	FALSE	1	1	2	A0A7R8UHI6	A0A7R8UHI6 [18180-18194]; [20255-20269]		0	2071.04	0.969	1.164	1.201	116.5	120.2	100.1	18.24	21.9	12.08		High	High	High	High	n/a	n/a	n/a	n/a	High	High	High	High	High	High	High	High	n/a	n/a	n/a	n/a	High	High	High	High	High	High
	FALSE	High	[R].NQVGISDALETEDK.[I]	1xTMTpro [N-Term]; 1xTMTpro [K14]	FALSE	1	1	4	A0A7R8UHI6	A0A7R8UHI6 [21458-21471]		0	2127.14	1.26	1.157	0.918	112.9	89.6	97.6	10.59	16.47	12.66		High	High	High	High	High	High	High	High	High	High	High	High	High	High	High	High	High	High	High	High	High	High	High	High	High	High
	FALSE	High	[R].DDSITYDEDSLTVK.[K]	1xTMTpro [N-Term]; 1xTMTpro [K14]	FALSE	1	1	3	A0A7R8UHI6	A0A7R8UHI6 [17915-17928]; [19990-20003]		0	2209.14	1.274	1.373	1.078	138	108.3	100.5	45.3	9.17	9.29		High	High	High	High	High	High	High	High	High	High	High	High	High	High	High	High	High	High	High	High	High	High	High	High	High	High
	FALSE	High	[R].NEIGLSEALESDEPYK.[V]	1xTMTpro [N-Term]; 1xTMTpro [K16]	FALSE	1	1	4	A0A7R8UHI6	A0A7R8UHI6 [21660-21675]		0	2402.26	1.288	1.079	0.838	103.8	80.6	96.2	15.61	11.83	8.96		High	High	High	High	High	High	High	High	n/a	n/a	n/a	n/a	High	High	High	High	High	High	High	High	n/a	n/a	n/a	n/a	High	High
	FALSE	High	[R].NEIGLSEALESDEPYK.[V]	1xDeamidated [N1]; 1xTMTpro [N-Term]; 1xTMTpro [K16]	FALSE	1	1	1	A0A7R8UHI6	A0A7R8UHI6 [21660-21675]		0	2403.24										No Quan Values	n/a	n/a	n/a	n/a	n/a	n/a	n/a	n/a	High	High	High	High	n/a	n/a	n/a	n/a	n/a	n/a	n/a	n/a	High	High	High	High	n/a	n/a
	FALSE	High	[R].VIAENPVGASEPIESDAITVR.[R]	1xTMTpro [N-Term]	FALSE	1	1	5	A0A7R8UHI6	A0A7R8UHI6 [21355-21375]		0	2471.33	1.587	1.234	0.777	121.9	76.8	98.8	29.84	34	21.86		High	High	High	High	High	High	High	High	High	High	High	High	High	High	High	High	High	High	High	High	High	High	High	High	High	High
	FALSE	High	[R].VIAENPVGASEPIESDAITVR.[R]	1xTMTpro [N-Term]; 1xDeamidated [N5]	FALSE	1	1	1	A0A7R8UHI6	A0A7R8UHI6 [21355-21375]		0	2472.32										No Quan Values	n/a	n/a	n/a	n/a	High	High	High	High	n/a	n/a	n/a	n/a	n/a	n/a	n/a	n/a	High	High	High	High	n/a	n/a	n/a	n/a	n/a	n/a
	FALSE	High	[K].DYTITEPEEDTPLSETPDIR.[K]	1xTMTpro [N-Term]	FALSE	1	1	2	A0A7R8UHI6	A0A7R8UHI6 [12442-12461]		0	2625.27	0.867	1.433	1.653	136.2	157.1	95	12.37	30.38	12.79		High	High	High	High	High	High	High	High	n/a	n/a	n/a	n/a	High	High	High	High	High	High	High	High	n/a	n/a	n/a	n/a	High	High
	FALSE	High	[K].EPEEITEAPTTQEEIPEQEK.[L]	1xTMTpro [N-Term]; 1xTMTpro [K20]	FALSE	1	1	2	A0A7R8UHI6	A0A7R8UHI6 [16241-16260]		0	2935.49	0.83	1.411	1.701	147.7	178	104.6	22.71	36.34	39.78		High	High	High	High	High	High	High	High	n/a	n/a	n/a	n/a	High	High	High	High	High	High	High	High	n/a	n/a	n/a	n/a	High	High
	FALSE	High	[K].QDEESSEYQPQTDQHTPVEK.[T]	1xTMTpro [N-Term]; 1xTMTpro [K20]	FALSE	1	1	2	A0A7R8UHI6	A0A7R8UHI6 [16118-16137]		0	2983.44	0.791	1.403	1.773	134	169.4	95.5	34.87	25.72	30.58		High	High	High	High	n/a	n/a	n/a	n/a	High	High	High	High	High	High	High	High	n/a	n/a	n/a	n/a	High	High	High	High	High	High
	FALSE	High	[K].KVEDIQDEELPQESPIEEEEK.[V]	1xTMTpro [N-Term]; 2xTMTpro [K1; K21]	FALSE	1	1	2	A0A7R8UHI6	A0A7R8UHI6 [15954-15974]		1	3425.8	1.155	1.558	1.349	148.2	128.4	95.2	42.82	27.46	39.37		High	High	High	High	n/a	n/a	n/a	n/a	n/a	n/a	n/a	n/a	High	High	High	High	n/a	n/a	n/a	n/a	n/a	n/a	n/a	n/a	High	High
	FALSE	High	[K].KVEDIQDEELPQESPIEEEEK.[V]	1xTMTpro [N-Term]; 2xTMTpro [K1; K21]; 1xDeamidated [Q12]	FALSE	1	1	1	A0A7R8UHI6	A0A7R8UHI6 [15954-15974]		1	3426.78										No Quan Values	n/a	n/a	n/a	n/a	n/a	n/a	n/a	n/a	High	High	High	High	n/a	n/a	n/a	n/a	n/a	n/a	n/a	n/a	High	High	High	High	n/a	n/a
	FALSE	High	[R].ESTTSSYTK.[L]	1xTMTpro [N-Term]; 1xTMTpro [K9]	FALSE	1	1	3	A0A7R8UHI6	A0A7R8UHI6 [21422-21430]		0	1611.87	1.027	1.019	0.993	101.1	98.5	99.2	15.63	9.27	12.76		High	High	High	High	High	High	High	High	High	High	High	High	High	High	High	High	High	High	High	High	High	High	High	High	High	High
	FALSE	High	[K].VVDEDAGDYTIK.[L]	1xTMTpro [N-Term]; 1xTMTpro [K12]	FALSE	1	1	3	A0A7R8UHI6	A0A7R8UHI6 [20964-20975]		0	1933.04	1.091	1.163	1.066	117.1	107.2	100.6	12.92	8.84	10.52		High	High	High	High	High	High	High	High	High	High	High	High	High	High	High	High	High	High	High	High	High	High	High	High	High	High
	FALSE	High	[K].EGLAAESTDTYLK.[S]	1xTMTpro [N-Term]; 1xTMTpro [K13]	FALSE	1	1	3	A0A7R8UHI6	A0A7R8UHI6 [1249-1261]		0	2006.09	1.117	0.872	0.781	90.1	80.6	103.3	14.17	16.49	17.41		High	High	High	High	High	High	High	High	High	High	High	High	High	High	High	High	High	High	High	High	High	High	High	High	High	High
	FALSE	High	[K].SVVEEAESELVIK.[K]	1xTMTpro [N-Term]; 1xTMTpro [K13]	FALSE	1	1	1	A0A7R8UHI6	A0A7R8UHI6 [17396-17408]; [19488-19500]		0	2040.17										No Quan Values	High	High	High	High	n/a	n/a	n/a	n/a	n/a	n/a	n/a	n/a	High	High	High	High	n/a	n/a	n/a	n/a	n/a	n/a	n/a	n/a	High	High
	FALSE	High	[K].LTESEAPESAEDFVVK.[L]	1xTMTpro [N-Term]; 1xTMTpro [K16]	FALSE	1	1	3	A0A7R8UHI6	A0A7R8UHI6 [16952-16967]; [19079-19094]		0	2359.25	1.621	1.033	0.637	101.6	62.7	98.3	15.15	36.54	32.65		High	High	High	High	High	High	High	High	High	High	High	High	High	High	High	High	High	High	High	High	High	High	High	High	High	High
	FALSE	High	[KL].VEELPEQVTVFETVTK.[E]	1xTMTpro [N-Term]; 1xTMTpro [K16]	FALSE	1	1	6	A0A7R8UHI6	A0A7R8UHI6 [2184-2199]; [2329-2344]; [2474-2489]; [2619-2634]; [2764-2779]; [2909-2924]; [3054-3069]; [3199-3214]; [3344-3359]; [3489-3504]; [3634-3649]; [3779-3794]; [3924-3939]; [4069-4084]; [4214-4229]; [4359-4374]; [4504-4519]; [4649-4664]; [4794-4809]; [4939-4954]; [5084-5099]; [5374-5389]; [5519-5534]; [5590-5605]; [5664-5679]; [6080-6095]; [6225-6240]; [6370-6385]; [6515-6530]; [6660-6675]…		0	2456.38	1.833	0.958	0.523	98.3	53.6	102.5	27.42	31.55	9.63		High	High	High	High	High	High	High	High	High	High	High	High	High	High	High	High	High	High	High	High	High	High	High	High	High	High
	FALSE	High	[KL].VEELPEQVTVFETVTK.[E]	1xTMTpro [N-Term]; 1xDeamidated [Q7]; 1xTMTpro [K16]	FALSE	1	1	6	A0A7R8UHI6	A0A7R8UHI6 [2184-2199]; [2329-2344]; [2474-2489]; [2619-2634]; [2764-2779]; [2909-2924]; [3054-3069]; [3199-3214]; [3344-3359]; [3489-3504]; [3634-3649]; [3779-3794]; [3924-3939]; [4069-4084]; [4214-4229]; [4359-4374]; [4504-4519]; [4649-4664]; [4794-4809]; [4939-4954]; [5084-5099]; [5374-5389]; [5519-5534]; [5590-5605]; [5664-5679]; [6080-6095]; [6225-6240]; [6370-6385]; [6515-6530]; [6660-6675]…		0	2457.36	2.587	2.144	0.829	196.9	76.1	91.8	37.47	13.13	25.61		High	High	High	High	High	High	High	High	High	High	High	High	High	High	High	High	High	High	High	High	High	High	High	High	High	High
	FALSE	High	[K].EVPVEEDVPVSVEELPK.[Q]	1xTMTpro [N-Term]; 1xTMTpro [K17]	FALSE	1	1	4	A0A7R8UHI6	A0A7R8UHI6 [15332-15348]		0	2502.38	1.279	1.267	0.991	117.9	92.2	93.1	33.58	53.71	35.1		High	High	High	High	High	High	High	High	High	High	High	High	High	High	High	High	High	High	High	High	High	High	High	High	High	High
	FALSE	High	[K].IETIEEDEMAPVTTVTVK.[E]	1xTMTpro [N-Term]; 1xTMTpro [K18]	FALSE	1	1	3	A0A7R8UHI6	A0A7R8UHI6 [9407-9424]		0	2613.42	1.719	1.336	0.777	136.8	79.6	102.5	28.8	17.65	6.29		High	High	High	High	High	High	High	High	n/a	n/a	n/a	n/a	High	High	High	High	High	High	High	High	n/a	n/a	n/a	n/a	High	High
	FALSE	High	[K].TPEGTQFEPSEFETDSTK.[L]	1xTMTpro [N-Term]; 1xTMTpro [K18]	FALSE	1	1	2	A0A7R8UHI6	A0A7R8UHI6 [12841-12858]		0	2638.3	1.151	1.098	0.954	114.6	99.6	104.4	18.71	19.54	35.93		High	High	High	High	High	High	High	High	n/a	n/a	n/a	n/a	High	High	High	High	High	High	High	High	n/a	n/a	n/a	n/a	High	High
	FALSE	High	[K].VVEPAPEEVVEEEVAEVTIK.[K]	1xTMTpro [N-Term]; 1xTMTpro [K20]	FALSE	1	1	3	A0A7R8UHI6	A0A7R8UHI6 [17481-17500]		0	2803.55	1.112	1.03	0.927	84.6	76.1	82.2	43.02	28.99	32.53		High	High	High	High	High	High	High	High	High	High	High	High	High	High	High	High	High	High	High	High	High	High	High	High	High	High
	FALSE	High	[K].ELVPEEKPEEVADVTVK.[K]	1xTMTpro [N-Term]; 2xTMTpro [K7; K17]	FALSE	1	1	1	A0A7R8UHI6	A0A7R8UHI6 [17339-17355]		0	2823.62	1.344	1.313	0.977	126.9	94.4	96.7	20.13	39.22	14.34		High	High	High	High	n/a	n/a	n/a	n/a	n/a	n/a	n/a	n/a	High	High	High	High	n/a	n/a	n/a	n/a	n/a	n/a	n/a	n/a	High	High
	FALSE	High	[K].VVEQAPEEVIEEEVADVTIK.[K]	1xTMTpro [N-Term]; 1xTMTpro [K20]	FALSE	1	1	4	A0A7R8UHI6	A0A7R8UHI6 [17555-17574]; [19647-19666]		0	2834.55	1.196	1.145	0.958	111	92.8	96.9	25	21.62	10.59		High	High	High	High	High	High	High	High	High	High	High	High	High	High	High	High	High	High	High	High	High	High	High	High	High	High
	FALSE	High	[K].VVEQTPEEVVEEEVAEVTIK.[K]	1xTMTpro [N-Term]; 1xTMTpro [K20]	FALSE	1	1	4	A0A7R8UHI6	A0A7R8UHI6 [19573-19592]		0	2864.56	1.413	1.249	0.883	93.6	66.3	75	51.18	68.74	79.36		High	High	High	High	High	High	High	High	High	High	High	High	High	High	High	High	High	High	High	High	High	High	High	High	High	High
	FALSE	High	[K].ENIAIDQQEIPSYVAEDAFK.[S]	1xTMTpro [N-Term]; 1xTMTpro [K20]	FALSE	1	1	2	A0A7R8UHI6	A0A7R8UHI6 [381-400]		0	2888.52	1.151	0.911	0.791	94.4	82	103.7	11.43	25.43	14.24		High	High	High	High	High	High	High	High	n/a	n/a	n/a	n/a	High	High	High	High	High	High	High	High	n/a	n/a	n/a	n/a	High	High
	FALSE	High	[K].ENIAIDQQEIPSYVAEDAFK.[S]	1xTMTpro [N-Term]; 1xDeamidated [Q]; 1xTMTpro [K20]	FALSE	1	1	3	A0A7R8UHI6	A0A7R8UHI6 [381-400]		0	2889.5	1.704	1.1	0.645	115.9	68	105.4	23.29	29.23	22.34		High	High	High	High	n/a	n/a	n/a	n/a	n/a	n/a	n/a	n/a	High	High	High	High	n/a	n/a	n/a	n/a	n/a	n/a	n/a	n/a	High	High
	FALSE	High	[K].ENIAIDQQEIPSYVAEDAFK.[S]	1xTMTpro [N-Term]; 2xDeamidated [Q7; Q8]; 1xTMTpro [K20]	FALSE	1	1	2	A0A7R8UHI6	A0A7R8UHI6 [381-400]		0	2890.49										No Quan Values	n/a	n/a	n/a	n/a	High	High	High	High	High	High	High	High	n/a	n/a	n/a	n/a	High	High	High	High	High	High	High	High	n/a	n/a
	FALSE	High	[K].EQPDIEDESIVEEIHEVTIK.[E]	1xTMTpro [N-Term]; 1xTMTpro [K20]	FALSE	1	1	1	A0A7R8UHI6	A0A7R8UHI6 [17056-17075]		0	2960.56										No Quan Values	n/a	n/a	n/a	n/a	High	High	High	High	n/a	n/a	n/a	n/a	n/a	n/a	n/a	n/a	High	High	High	High	n/a	n/a	n/a	n/a	n/a	n/a
	FALSE	High	[K].IETVEEDDKAPVTTVTVEEAK.[K]	1xTMTpro [N-Term]; 2xTMTpro [K9; K21]	FALSE	1	1	3	A0A7R8UHI6	A0A7R8UHI6 [4401-4421]; [5126-5146]		1	3215.77	5.515	1.075	0.195	110.7	20.1	103	68.37	79.5	31.87		High	High	High	High	High	High	High	High	High	High	High	High	High	High	High	High	High	High	High	High	High	High	High	High	High	High
	FALSE	High	[K].IETVEEDDKAPVTTVTVEQVK.[K]	1xTMTpro [N-Term]; 2xTMTpro [K9; K21]; 1xDeamidated [Q19]	FALSE	1	1	1	A0A7R8UHI6	A0A7R8UHI6 [8007-8027]		1	3243.8	13.113	1.919	0.146	174.3	13.3	90.8	58.87	135.62	19.52		High	High	High	High	n/a	n/a	n/a	n/a	n/a	n/a	n/a	n/a	High	High	High	High	n/a	n/a	n/a	n/a	n/a	n/a	n/a	n/a	High	High
	FALSE	High	[K].IETVEEDDKAPVTTVTVEEVK.[K]	1xTMTpro [N-Term]; 2xTMTpro [K9; K21]	FALSE	1	1	2	A0A7R8UHI6	A0A7R8UHI6 [2081-2101]; [2226-2246]; [2371-2391]; [2516-2536]; [2661-2681]; [2806-2826]; [2951-2971]; [3096-3116]; [3241-3261]; [3386-3406]; [3531-3551]; [3676-3696]; [4111-4131]; [4256-4276]; [4546-4566]; [4691-4711]; [4981-5001]; [5271-5291]; [5416-5436]; [5561-5581]; [5706-5726]; [5851-5871]; [5977-5997]; [6122-6142]; [6267-6287]; [6412-6432]; [6557-6577]; [6702-6722]; [6847-6867]; [6992-7012]…		1	3243.8	5.386	1.779	0.33	166.2	30.8	93.4	50.79	87.39	17.07		High	High	High	High	n/a	n/a	n/a	n/a	High	High	High	High	High	High	High	High	n/a	n/a	n/a	n/a	High	High	High	High	High	High
	FALSE	High	[K].IETVEEDDKAPVTTVTIEEVK.[K]	1xTMTpro [N-Term]; 2xTMTpro [K9; K21]	FALSE	1	1	1	A0A7R8UHI6	A0A7R8UHI6 [9912-9932]		1	3257.82	1.309	1.173	0.897	120.5	92	102.7	15.58	8.84	12.62		n/a	n/a	n/a	n/a	High	High	High	High	n/a	n/a	n/a	n/a	n/a	n/a	n/a	n/a	High	High	High	High	n/a	n/a	n/a	n/a	n/a	n/a
	FALSE	High	[R].TELPKDELEQVEMPSQPEDEEK.[T]	1xTMTpro [N-Term]; 2xTMTpro [K5; K22]	FALSE	1	1	1	A0A7R8UHI6	A0A7R8UHI6 [16543-16564]		1	3512.81	1.562	1.236	0.792	125.5	80.4	101.5	46.2	34.58	22.38		n/a	n/a	n/a	n/a	n/a	n/a	n/a	n/a	High	High	High	High	n/a	n/a	n/a	n/a	n/a	n/a	n/a	n/a	High	High	High	High	n/a	n/a
	FALSE	High	[K].KPEEEEALVEELPEQVTVLETVTK.[E]	1xTMTpro [N-Term]; 2xTMTpro [K1; K24]	FALSE	1	1	1	A0A7R8UHI6	A0A7R8UHI6 [4712-4735]		0	3652.04	2.127	1.261	0.593	134.4	63.2	106.6	33.24	9.42	19.31		n/a	n/a	n/a	n/a	n/a	n/a	n/a	n/a	High	High	High	High	n/a	n/a	n/a	n/a	n/a	n/a	n/a	n/a	High	High	High	High	n/a	n/a
	FALSE	High	[K].KPEEEEALVEELPEQVTVLETVTK.[E]	1xTMTpro [N-Term]; 2xTMTpro [K1; K24]; 1xDeamidated [Q15]	FALSE	1	1	1	A0A7R8UHI6	A0A7R8UHI6 [4712-4735]		0	3653.02										No Quan Values	High	High	High	High	n/a	n/a	n/a	n/a	n/a	n/a	n/a	n/a	High	High	High	High	n/a	n/a	n/a	n/a	n/a	n/a	n/a	n/a	High	High
	FALSE	High	[K].KPEDEETLVEELPEQVTVLETVTK.[E]	1xTMTpro [N-Term]; 2xTMTpro [K1; K24]	FALSE	1	1	1	A0A7R8UHI6	A0A7R8UHI6 [3552-3575]		0	3668.03	2.331	1.251	0.536	132.3	56.8	105.8	33.94	31.67	20.07		n/a	n/a	n/a	n/a	High	High	High	High	n/a	n/a	n/a	n/a	n/a	n/a	n/a	n/a	High	High	High	High	n/a	n/a	n/a	n/a	n/a	n/a
	FALSE	High	[K].KPEEEQTLVEELPEQVTVLETVTK.[E]	1xTMTpro [N-Term]; 2xTMTpro [K1; K24]	FALSE	1	1	4	A0A7R8UHI6	A0A7R8UHI6 [2102-2125]; [2247-2270]; [2392-2415]; [3117-3140]; [3407-3430]; [3987-4010]; [4277-4300]; [5437-5460]; [5727-5750]; [6288-6311]; [7448-7471]; [7883-7906]; [8318-8341]; [8608-8631]; [8753-8776]; [8898-8921]; [9043-9066]		0	3681.07	7.334	1.404	0.191	136.7	18.6	97.3	60.41	117.4	21.92		High	High	High	High	High	High	High	High	High	High	High	High	High	High	High	High	High	High	High	High	High	High	High	High	High	High
	FALSE	High	[K].KPEEEQTLVEELPEQVTVLETVTK.[E]	1xTMTpro [N-Term]; 2xTMTpro [K1; K24]; 1xDeamidated [Q]	FALSE	1	1	5	A0A7R8UHI6	A0A7R8UHI6 [2102-2125]; [2247-2270]; [2392-2415]; [3117-3140]; [3407-3430]; [3987-4010]; [4277-4300]; [5437-5460]; [5727-5750]; [6288-6311]; [7448-7471]; [7883-7906]; [8318-8341]; [8608-8631]; [8753-8776]; [8898-8921]; [9043-9066]		0	3682.05	3.566	1.381	0.387	133.7	37.5	96.8	42.88	46.32	10.83		High	High	High	High	High	High	High	High	High	High	High	High	High	High	High	High	High	High	High	High	High	High	High	High	High	High
	FALSE	High	[K].KPEEEQTLVEELPEQVTVLETVTK.[E]	1xTMTpro [N-Term]; 2xTMTpro [K1; K24]; 2xDeamidated [Q6; Q15]	FALSE	1	1	1	A0A7R8UHI6	A0A7R8UHI6 [2102-2125]; [2247-2270]; [2392-2415]; [3117-3140]; [3407-3430]; [3987-4010]; [4277-4300]; [5437-5460]; [5727-5750]; [6288-6311]; [7448-7471]; [7883-7906]; [8318-8341]; [8608-8631]; [8753-8776]; [8898-8921]; [9043-9066]		0	3683.03										No Quan Values	High	High	High	High	n/a	n/a	n/a	n/a	n/a	n/a	n/a	n/a	High	High	High	High	n/a	n/a	n/a	n/a	n/a	n/a	n/a	n/a	High	High
	FALSE	High	[K].KPEEEETLVEELPQQVTVLETVTK.[E]	1xTMTpro [N-Term]; 2xTMTpro [K1; K24]; 1xDeamidated [Q]	FALSE	1	1	2	A0A7R8UHI6	A0A7R8UHI6 [2972-2995]		0	3682.05	3.994	1.448	0.362	142.3	35.6	98.3	49.88	61.95	11.09		High	High	High	High	High	High	High	High	n/a	n/a	n/a	n/a	High	High	High	High	High	High	High	High	n/a	n/a	n/a	n/a	High	High
	FALSE	High	[K].KPEEEETLVEELPQQVTVLETVTK.[E]	1xTMTpro [N-Term]; 2xTMTpro [K1; K24]; 2xDeamidated [Q14; Q15]	FALSE	1	1	3	A0A7R8UHI6	A0A7R8UHI6 [2972-2995]		0	3683.03										No Quan Values	High	High	High	High	High	High	High	High	n/a	n/a	n/a	n/a	High	High	High	High	High	High	High	High	n/a	n/a	n/a	n/a	High	High
	FALSE	High	[K].KPEEEETLVEELPEQVTVLETITK.[E]	1xTMTpro [N-Term]; 2xTMTpro [K1; K24]	FALSE	1	1	7	A0A7R8UHI6	A0A7R8UHI6 [6868-6891]; [7593-7616]; [9428-9451]		0	3696.07	4.826	1.317	0.273	128.1	26.5	97.3	50.25	76.36	6.96		High	High	High	High	High	High	High	High	High	High	High	High	High	High	High	High	High	High	High	High	High	High	High	High	High	High
	FALSE	High	[K].KPEEEETLVEELPEQVTVLETITK.[E]	1xTMTpro [N-Term]; 2xTMTpro [K1; K24]; 1xDeamidated [Q15]	FALSE	1	1	2	A0A7R8UHI6	A0A7R8UHI6 [6868-6891]; [7593-7616]; [9428-9451]		0	3697.05										No Quan Values	n/a	n/a	n/a	n/a	High	High	High	High	High	High	High	High	n/a	n/a	n/a	n/a	High	High	High	High	High	High	High	High	n/a	n/a
	FALSE	High	[K].DAPVSVEELPEEVETVQVLDEEEKPK.[T]	1xTMTpro [N-Term]; 2xTMTpro [K24; K26]	FALSE	1	1	4	A0A7R8UHI6	A0A7R8UHI6 [15353-15378]		0	3850.07	1.917	0.904	0.472	92.2	48.1	102	43.95	24.97	23.26		High	High	High	High	High	High	High	High	High	High	High	High	High	High	High	High	High	High	High	High	High	High	High	High	High	High
	FALSE	High	[K].EVPVGEEVPVSVEELPEEVETVQVLDEEEKPK.[T]	1xTMTpro [N-Term]; 2xTMTpro [K30; K32]	FALSE	1	1	2	A0A7R8UHI6	A0A7R8UHI6 [15794-15825]		0	4502.41	2.06	1.233	0.598	111.6	54.2	90.5	55.46	31.73	36.79		High	High	High	High	n/a	n/a	n/a	n/a	High	High	High	High	High	High	High	High	n/a	n/a	n/a	n/a	High	High	High	High	High	High
	FALSE	High	[K].EVPVEEEVPVSVEELPEEVETVQVLDEEEKPK.[T]	1xTMTpro [N-Term]; 2xTMTpro [K30; K32]	FALSE	1	1	2	A0A7R8UHI6	A0A7R8UHI6 [13255-13286]; [13543-13574]; [13687-13718]; [14468-14499]; [14612-14643]; [14756-14787]; [14900-14931]; [15044-15075]; [15188-15219]; [15650-15681]		0	4574.43	5.289	1.399	0.264	136.7	25.9	97.8	50.42	74.32	5.77		High	High	High	High	High	High	High	High	n/a	n/a	n/a	n/a	High	High	High	High	High	High	High	High	n/a	n/a	n/a	n/a	High	High
	FALSE	High	[K].EVPVEEEVPVSVEELPEEVETVQVLDEEEKPK.[T]	1xTMTpro [N-Term]; 1xDeamidated [Q23]; 2xTMTpro [K30; K32]	FALSE	1	1	2	A0A7R8UHI6	A0A7R8UHI6 [13255-13286]; [13543-13574]; [13687-13718]; [14468-14499]; [14612-14643]; [14756-14787]; [14900-14931]; [15044-15075]; [15188-15219]; [15650-15681]		0	4575.42	2.205	1.594	0.723	172.7	78.3	108.3	38.98	47.72	23.13		n/a	n/a	n/a	n/a	High	High	High	High	n/a	n/a	n/a	n/a	n/a	n/a	n/a	n/a	High	High	High	High	n/a	n/a	n/a	n/a	n/a	n/a
	FALSE	High	[K].EVPVEEEVPVSVEELPEEVETVEVLDEEEKPK.[K]	1xTMTpro [N-Term]; 2xTMTpro [K30; K32]	FALSE	1	1	3	A0A7R8UHI6	A0A7R8UHI6 [13111-13142]		0	4575.42	2.341	1.559	0.666	168	71.8	107.7	51.42	58.2	21.04		n/a	High	High	High	High	High	High	High	High	High	High	High	High	High	n/a	High	High	High	High	High	n/a	High	High	High	High	High
	FALSE	High	[K].ETPIEEETPVSIEELPQEVETTQVIDEEEKPK.[T]	1xTMTpro [N-Term]; 2xTMTpro [K30; K32]	FALSE	1	1	1	A0A7R8UHI6	A0A7R8UHI6 [14324-14355]		0	4607.42	2.542	1.205	0.474	122.1	48	101.3	43.08	59.34	31.75		High	High	High	High	n/a	n/a	n/a	n/a	n/a	n/a	n/a	n/a	High	High	High	High	n/a	n/a	n/a	n/a	n/a	n/a	n/a	n/a	High	High
	FALSE	High	[K].ETPIEEETPVSIEELPQEVETTQVIDEEEKPK.[T]	1xTMTpro [N-Term]; 1xDeamidated [Q17]; 2xTMTpro [K30; K32]	FALSE	1	1	4	A0A7R8UHI6	A0A7R8UHI6 [14324-14355]		0	4608.4	1.877	1.281	0.683	130.3	69.4	101.7	43.91	38.11	25.98		High	High	High	High	High	High	High	High	High	High	High	High	High	High	High	High	High	High	High	High	High	High	High	High	High	High
	FALSE	High	[K].ETPIEEETPVSIEELPQEVETTQVIDEEEKPK.[T]	1xTMTpro [N-Term]; 2xDeamidated [Q17; Q23]; 2xTMTpro [K30; K32]	FALSE	1	1	1	A0A7R8UHI6	A0A7R8UHI6 [14324-14355]		0	4609.39										No Quan Values	n/a	n/a	n/a	n/a	High	High	High	High	n/a	n/a	n/a	n/a	n/a	n/a	n/a	n/a	High	High	High	High	n/a	n/a	n/a	n/a	n/a	n/a
	FALSE	High	[K].AEEAIEVPEAIEEKPVQPTLPAEEEVPESYEVTLK.[E]	1xTMTpro [N-Term]; 2xTMTpro [K14; K35]	FALSE	1	1	1	A0A7R8UHI6	A0A7R8UHI6 [17126-17160]		0	4805.57	1.487	1.251	0.841	117.9	79.3	94.3	22.45	14.93	20.97		n/a	n/a	n/a	n/a	High	High	High	High	n/a	n/a	n/a	n/a	n/a	n/a	n/a	n/a	High	High	High	High	n/a	n/a	n/a	n/a	n/a	n/a
	FALSE	High	[K].SLIEQEIPK.[T]	1xTMTpro [N-Term]; 1xTMTpro [K9]	FALSE	1	1	6	A0A7R8UHI6	A0A7R8UHI6 [13218-13226]; [13362-13370]; [13506-13514]; [13650-13658]; [13794-13802]; [14431-14439]; [14575-14583]; [14719-14727]; [14863-14871]; [15007-15015]; [15151-15159]; [15454-15462]; [15613-15621]; [15757-15765]; [15901-15909]		0	1665.01	1.102	0.852	0.773	82.1	74.5	96.4	43.36	16.74	9.06		High	High	High	High	High	High	High	High	High	High	High	High	High	High	High	High	High	High	High	High	High	High	High	High	High	High
	FALSE	High	[K].EVPIEEVPVLVK.[E]	1xTMTpro [N-Term]; 1xTMTpro [K12]	FALSE	1	1	3	A0A7R8UHI6	A0A7R8UHI6 [15938-15949]		0	1959.2	1.172	0.794	0.678	73.9	63.1	93	54.61	18.16	23.45		High	High	High	High	High	High	High	High	High	High	High	High	High	High	High	High	High	High	High	High	High	High	High	High	High	High
	FALSE	High	[K].EAVIGFEELTQK.[N]	1xTMTpro [N-Term]; 1xDeamidated [Q11]; 1xTMTpro [K12]	FALSE	1	1	3	A0A7R8UHI6	A0A7R8UHI6 [761-772]		0	1973.11	3.587	1.792	0.5	183.2	51.1	102.2	39.95	11.13	50.85		High	High	High	High	High	High	High	High	High	High	High	High	High	High	High	High	High	High	High	High	High	High	High	High	High	High
	FALSE	High	[K].LTSDEASAELVIK.[K]	1xTMTpro [N-Term]; 1xTMTpro [K13]	FALSE	1	1	1	A0A7R8UHI6	A0A7R8UHI6 [17696-17708]; [19771-19783]		0	1984.15	0.847	0.911	1.075	88.4	104.4	97	16.69	9.72	10.11		High	High	High	High	n/a	n/a	n/a	n/a	n/a	n/a	n/a	n/a	High	High	High	High	n/a	n/a	n/a	n/a	n/a	n/a	n/a	n/a	High	High
	FALSE	High	[R].LEELPEQVTVLK.[T]	1xTMTpro [N-Term]; 1xTMTpro [K12]	FALSE	1	1	6	A0A7R8UHI6	A0A7R8UHI6 [1965-1976]		0	2006.2	1.477	0.923	0.625	93	63	100.8	22.64	26.22	12.89		High	High	High	High	High	High	High	High	High	High	High	High	High	High	High	High	High	High	High	High	High	High	High	High	High	High
	FALSE	High	[R].KVVDEDAGDYTIK.[L]	1xTMTpro [N-Term]; 2xTMTpro [K1; K13]	FALSE	1	1	2	A0A7R8UHI6	A0A7R8UHI6 [20963-20975]		1	2365.34	1.387	1.204	0.869	118.6	85.5	98.5	14.17	21.66	11.53		High	High	High	High	n/a	n/a	n/a	n/a	High	High	High	High	High	High	High	High	n/a	n/a	n/a	n/a	High	High	High	High	High	High
	FALSE	High	[K].KEETQTEEVTIVK.[K]	1xTMTpro [N-Term]; 2xTMTpro [K1; K13]	FALSE	1	1	2	A0A7R8UHI6	A0A7R8UHI6 [16771-16783]; [18958-18970]		1	2446.42	1.307	1.448	1.108	141.7	108.4	97.8	32.35	35.38	19.61		High	High	High	High	High	High	High	High	n/a	n/a	n/a	n/a	High	High	High	High	High	High	High	High	n/a	n/a	n/a	n/a	High	High
	FALSE	High	[K].IEELPEQVTVIETITK.[E]	1xTMTpro [N-Term]; 1xTMTpro [K16]	FALSE	1	1	3	A0A7R8UHI6	A0A7R8UHI6 [9295-9310]		0	2450.42	1.913	1.341	0.701	131.9	68.9	98.3	19.51	25.72	13.43		High	High	High	High	High	High	High	High	High	High	High	High	High	High	High	High	High	High	High	High	High	High	High	High	High	High
	FALSE	High	[K].KSVVEEAESELVIK.[K]	1xTMTpro [N-Term]; 2xTMTpro [K1; K14]	FALSE	1	1	2	A0A7R8UHI6	A0A7R8UHI6 [17395-17408]; [19487-19500]		1	2472.47	0.392	0.668	1.703	57.9	147.6	86.7	50.76	35.36	44.19		High	High	High	High	High	High	High	High	n/a	n/a	n/a	n/a	High	High	High	High	High	High	High	High	n/a	n/a	n/a	n/a	High	High
	FALSE	High	[K].IETVEEDDKAPVTTVTVK.[E]	1xTMTpro [N-Term]; 2xTMTpro [K9; K18]	FALSE	1	1	1	A0A7R8UHI6	A0A7R8UHI6 [3821-3838]; [3966-3983]; [4836-4853]		1	2886.65	2.406	1.033	0.429	103.1	42.9	99.9	55.01	15	26.59		High	High	High	High	n/a	n/a	n/a	n/a	n/a	n/a	n/a	n/a	High	High	High	High	n/a	n/a	n/a	n/a	n/a	n/a	n/a	n/a	High	High
	FALSE	High	[K].KEVPVEEDVPVSVEELPK.[Q]	1xTMTpro [N-Term]; 2xTMTpro [K1; K18]	FALSE	1	1	1	A0A7R8UHI6	A0A7R8UHI6 [15331-15348]		1	2934.69	1.001	1.192	1.191	113.3	113.3	95.1	10.44	32.76	20.3		High	High	High	High	n/a	n/a	n/a	n/a	n/a	n/a	n/a	n/a	High	High	High	High	n/a	n/a	n/a	n/a	n/a	n/a	n/a	n/a	High	High
	FALSE	High	[K].IETVEEDDQKPVTTVTVEK.[V]	1xTMTpro [N-Term]; 2xTMTpro [K10; K19]	FALSE	1	1	2	A0A7R8UHI6	A0A7R8UHI6 [9478-9496]		0	3072.71	2.242	1.229	0.548	124.1	55.3	101	35.77	27	6.57		High	High	High	High	n/a	n/a	n/a	n/a	High	High	High	High	High	High	High	High	n/a	n/a	n/a	n/a	High	High	High	High	High	High
	FALSE	High	[K].KPEEEQPLVEELPEQVTVLETVTK.[E]	1xTMTpro [N-Term]; 2xTMTpro [K1; K24]; 1xDeamidated [Q15]	FALSE	1	1	1	A0A7R8UHI6	A0A7R8UHI6 [4567-4590]; [6723-6746]; [7303-7326]; [8028-8051]		0	3678.06	1.572	0.976	0.621	98.5	62.6	100.9	33.8	18.18	17.52		High	High	High	High	n/a	n/a	n/a	n/a	n/a	n/a	n/a	n/a	High	High	High	High	n/a	n/a	n/a	n/a	n/a	n/a	n/a	n/a	High	High
	FALSE	High	[K].KPEEEQPLVEELPEQVTVLETVTK.[E]	1xTMTpro [N-Term]; 2xTMTpro [K1; K24]; 2xDeamidated [Q6; Q15]	FALSE	1	1	1	A0A7R8UHI6	A0A7R8UHI6 [4567-4590]; [6723-6746]; [7303-7326]; [8028-8051]		0	3679.04	2.242	1.286	0.574	122.3	54.5	95.1	45.75	40.19	21.12		n/a	n/a	n/a	n/a	n/a	n/a	n/a	n/a	High	High	High	High	n/a	n/a	n/a	n/a	n/a	n/a	n/a	n/a	High	High	High	High	n/a	n/a
	FALSE	High	[K].KPEEEETLVEELPEQITVLETVTK.[E]	1xTMTpro [N-Term]; 2xTMTpro [K1; K24]	FALSE	1	1	1	A0A7R8UHI6	A0A7R8UHI6 [5292-5315]; [5998-6021]		0	3696.07	1.632	0.952	0.583	95.7	58.6	100.5	39.1	30.27	11.94		High	High	High	High	n/a	n/a	n/a	n/a	n/a	n/a	n/a	n/a	High	High	High	High	n/a	n/a	n/a	n/a	n/a	n/a	n/a	n/a	High	High
	FALSE	High	[K].KPEEEETLVEELPEQITVLETVTK.[E]	1xTMTpro [N-Term]; 2xTMTpro [K1; K24]; 1xDeamidated [Q15]	FALSE	1	1	1	A0A7R8UHI6	A0A7R8UHI6 [5292-5315]; [5998-6021]		0	3697.05										No Quan Values	n/a	n/a	n/a	n/a	High	High	High	High	n/a	n/a	n/a	n/a	n/a	n/a	n/a	n/a	High	High	High	High	n/a	n/a	n/a	n/a	n/a	n/a
	FALSE	High	[K].IETVEEDDQKPVTTVTIEEAPKPEK.[V]	1xTMTpro [N-Term]; 3xTMTpro [K10; K22; K25]	FALSE	1	1	1	A0A7R8UHI6	A0A7R8UHI6 [2007-2031]; [4327-4351]; [5052-5076]; [6048-6072]		0	4042.26	7.471	2.066	0.277	180.4	24.1	87.3	59.68	117.46	46.34		n/a	n/a	n/a	n/a	High	High	High	High	n/a	n/a	n/a	n/a	n/a	n/a	n/a	n/a	High	High	High	High	n/a	n/a	n/a	n/a	n/a	n/a
	FALSE	High	[K].IIVEVEEVTFTK.[K]	1xTMTpro [N-Term]; 1xTMTpro [K12]	FALSE	1	1	2	A0A7R8UHI6	A0A7R8UHI6 [18457-18468]; [20532-20543]		0	2015.19	1.103	1.008	0.914	98.7	89.5	98	15.63	8.49	8.43		High	High	High	High	High	High	High	High	n/a	n/a	n/a	n/a	High	High	High	High	High	High	High	High	n/a	n/a	n/a	n/a	High	High
	FALSE	High	[K].LTVEEPIVDFTLK.[L]	1xTMTpro [N-Term]; 1xTMTpro [K13]	FALSE	1	1	2	A0A7R8UHI6	A0A7R8UHI6 [18687-18699]		0	2112.24	1.018	0.669	0.657	66.3	65.1	99.2	19.78	19.39	6.49		High	High	High	High	High	High	High	High	n/a	n/a	n/a	n/a	High	High	High	High	High	High	High	High	n/a	n/a	n/a	n/a	High	High
	FALSE	High	[K].IEELPEQVTVFETITK.[E]	1xTMTpro [N-Term]; 1xTMTpro [K16]	FALSE	1	1	3	A0A7R8UHI6	A0A7R8UHI6 [10015-10030]; [10305-10320]; [10450-10465]; [10740-10755]; [11030-11045]; [11465-11480]; [11610-11625]		0	2484.41	2.761	1.063	0.385	107.5	38.9	101.1	44.81	63.05	10.41		High	High	High	High	High	High	High	High	High	High	High	High	High	High	High	High	High	High	High	High	High	High	High	High	High	High
	FALSE	High	[R].SIAVNEIGPSPPSPLSPTIK.[I]	1xTMTpro [N-Term]; 1xTMTpro [K20]	FALSE	1	1	4	A0A7R8UHI6	A0A7R8UHI6 [21067-21086]		0	2612.52	0.983	0.752	0.765	74.5	75.8	99	10.03	8.37	10.38		High	High	High	High	High	High	High	High	High	High	High	High	High	High	High	High	High	High	High	High	High	High	High	High	High	High
	FALSE	High	[R].ESSLADILEGIPPTFSK.[K]	1xTMTpro [N-Term]; 1xTMTpro [K17]	FALSE	1	1	3	A0A7R8UHI6	A0A7R8UHI6 [18160-18176]; [20235-20251]		0	2412.35	1.258	1.046	0.832	105.7	84.1	101.1	8.23	12	4.5		High	High	High	High	High	High	High	High	High	High	High	High	High	High	High	High	High	High	High	High	High	High	High	High	High	High
	FALSE	High	[K].DIPEDTTDEIK.[L]	1xTMTpro [N-Term]; 1xTMTpro [K11]	FALSE	1	1	2	A0A7R8UHI6	A0A7R8UHI6 [16611-16621]; [18798-18808]		0	1884.01	1.41	1.253	0.889	120.2	85.3	95.9	22.4	10.76	13.03		n/a	n/a	n/a	n/a	High	High	High	High	High	High	High	High	n/a	n/a	n/a	n/a	High	High	High	High	High	High	High	High	n/a	n/a
	FALSE	High	[K].LETPKEPEEITEAPTTQEEIPEQEK.[L]	1xTMTpro [N-Term]; 2xTMTpro [K5; K25]; 1xDeamidated [Q17]	FALSE	1	1	1	A0A7R8UHI6	A0A7R8UHI6 [16236-16260]		1	3809										No Quan Values	n/a	n/a	n/a	n/a	High	High	High	High	n/a	n/a	n/a	n/a	n/a	n/a	n/a	n/a	High	High	High	High	n/a	n/a	n/a	n/a	n/a	n/a
	FALSE	High	[EDK].EETLVEELPEQVTVLETVTK.[E]	1xTMTpro [N-Term]; 1xTMTpro [K20]	FALSE	1	1	1	A0A7R8UHI6	A0A7R8UHI6 [2541-2560]; [2686-2705]; [2831-2850]; [3266-3285]; [3556-3575]; [3701-3720]; [3846-3865]; [4136-4155]; [4426-4445]; [4861-4880]; [5006-5025]; [5151-5170]; [6147-6166]; [6582-6601]; [7017-7036]; [7742-7761]; [8467-8486]; [9937-9956]; [10082-10101]; [10227-10246]; [10372-10391]; [10517-10536]; [10662-10681]; [10807-10826]; [10952-10971]; [11097-11116]; [11242-11261]; [11387-11406]; [115…		0	2894.61	1.72	0.791	0.46	67.2	39.1	85	41.13	15.28	51.05		n/a	n/a	n/a	n/a	High	High	High	High	n/a	n/a	n/a	n/a	n/a	n/a	n/a	n/a	High	High	High	High	n/a	n/a	n/a	n/a	n/a	n/a
	FALSE	High	[R].LVVHDATEDDEAEYSCVAANAHTK.[S]	1xTMTpro [N-Term]; 1xCarbamidomethyl [C16]; 1xTMTpro [K24]	FALSE	1	1	1	A0A7R8UHI6	A0A7R8UHI6 [18753-18776]; [20866-20889]		0	3253.59	0.993	0.94	0.947	95.9	96.6	102	15.68	20.42	22.31		n/a	n/a	n/a	n/a	High	High	High	High	n/a	n/a	n/a	n/a	n/a	n/a	n/a	n/a	High	High	High	High	n/a	n/a	n/a	n/a	n/a	n/a
	FALSE	High	[K].KPEEEETLVEELPEQVTVLETVTK.[E]	1xTMTpro [N-Term]; 2xTMTpro [K1; K24]	FALSE	1	1	5	A0A7R8UHI6	A0A7R8UHI6 [2537-2560]; [2682-2705]; [2827-2850]; [3262-3285]; [3697-3720]; [3842-3865]; [4132-4155]; [4422-4445]; [4857-4880]; [5002-5025]; [5147-5170]; [6143-6166]; [6578-6601]; [7013-7036]; [7738-7761]; [8463-8486]; [10078-10101]; [10223-10246]; [10368-10391]; [10513-10536]; [10658-10681]; [10803-10826]; [10948-10971]; [11093-11116]; [11238-11261]; [11383-11406]; [11528-11551]; [11673-11696]		0	3682.05	7.745	2.439	0.315	237.1	30.6	97.2	52.95	36.92	40.09		n/a	n/a	n/a	n/a	High	High	High	High	High	High	High	High	n/a	n/a	n/a	n/a	High	High	High	High	High	High	High	High	n/a	n/a
	FALSE	High	[K].KPEEEETLVEELPEQVTVLETVTK.[E]	1xTMTpro [N-Term]; 2xTMTpro [K1; K24]; 1xDeamidated [Q15]	FALSE	1	1	5	A0A7R8UHI6	A0A7R8UHI6 [2537-2560]; [2682-2705]; [2827-2850]; [3262-3285]; [3697-3720]; [3842-3865]; [4132-4155]; [4422-4445]; [4857-4880]; [5002-5025]; [5147-5170]; [6143-6166]; [6578-6601]; [7013-7036]; [7738-7761]; [8463-8486]; [10078-10101]; [10223-10246]; [10368-10391]; [10513-10536]; [10658-10681]; [10803-10826]; [10948-10971]; [11093-11116]; [11238-11261]; [11383-11406]; [11528-11551]; [11673-11696]		0	3683.03	2.894	1.441	0.498	139.7	48.3	97	43.2	38.47	14.08		n/a	n/a	n/a	n/a	n/a	n/a	n/a	n/a	High	High	High	High	n/a	n/a	n/a	n/a	n/a	n/a	n/a	n/a	High	High	High	High	n/a	n/a
	FALSE	High	[K].EVPVEEEVPVSVEELPEEIETVQVIDEEEKPK.[T]	1xTMTpro [N-Term]; 2xTMTpro [K30; K32]	FALSE	1	1	1	A0A7R8UHI6	A0A7R8UHI6 [13831-13862]		0	4588.45	3.687	1.271	0.345	132.8	36	104.5	47.09	62.09	13.4		n/a	n/a	n/a	n/a	n/a	n/a	n/a	n/a	High	High	High	High	n/a	n/a	n/a	n/a	n/a	n/a	n/a	n/a	High	High	High	High	n/a	n/a
	FALSE	High	[K].EVPVEEEVPVSVEELPEEIETVQVIDEEEKPK.[T]	1xTMTpro [N-Term]; 1xDeamidated [Q23]; 2xTMTpro [K30; K32]	FALSE	1	1	1	A0A7R8UHI6	A0A7R8UHI6 [13831-13862]		0	4589.43										No Quan Values	n/a	n/a	n/a	n/a	High	High	High	High	n/a	n/a	n/a	n/a	n/a	n/a	n/a	n/a	High	High	High	High	n/a	n/a	n/a	n/a	n/a	n/a
	FALSE	High	[K].KPEEEETLVEELPEQVTILETVTK.[E]	1xTMTpro [N-Term]; 2xTMTpro [K1; K24]	FALSE	1	1	1	A0A7R8UHI6	A0A7R8UHI6 [6433-6456]		0	3696.07										No Quan Values	n/a	n/a	n/a	n/a	High	High	High	High	n/a	n/a	n/a	n/a	n/a	n/a	n/a	n/a	High	High	High	High	n/a	n/a	n/a	n/a	n/a	n/a
	FALSE	High	[K].IETVEEDDQKPVTTVTVEEGPKPK.[G]	1xTMTpro [N-Term]; 1xDeamidated [Q9]; 3xTMTpro [K10; K22; K24]	FALSE	1	1	1	A0A7R8UHI6	A0A7R8UHI6 [9093-9116]		0	3886.17										No Quan Values	n/a	n/a	n/a	n/a	n/a	n/a	n/a	n/a	High	High	High	High	n/a	n/a	n/a	n/a	n/a	n/a	n/a	n/a	High	High	High	High	n/a	n/a
	FALSE	High	[R].ELPMEVIVVESK.[S]	1xTMTpro [N-Term]; 1xTMTpro [K12]	FALSE	1	1	1	A0A7R8UHI6	A0A7R8UHI6 [12197-12208]		0	1981.15	1.268	0.885	0.697	87.8	69.2	99.2	9.93	21.79	17.07		n/a	n/a	n/a	n/a	High	High	High	High	n/a	n/a	n/a	n/a	n/a	n/a	n/a	n/a	High	High	High	High	n/a	n/a	n/a	n/a	n/a	n/a
	FALSE	High	[K].KPEEEQTLVEELPEQVTVVEIVTK.[E]	1xTMTpro [N-Term]; 2xTMTpro [K1; K24]; 1xDeamidated [Q15]	FALSE	1	1	2	A0A7R8UHI6	A0A7R8UHI6 [8173-8196]		0	3680.07	1.801	1.141	0.633	117.2	65.1	102.8	25.19	12.08	16.56		n/a	n/a	n/a	n/a	n/a	n/a	n/a	n/a	High	High	High	High	n/a	n/a	n/a	n/a	n/a	n/a	n/a	n/a	High	High	High	High	n/a	n/a
	FALSE	High	[K].DETAEEVTVK.[K]	1xTMTpro [N-Term]; 1xTMTpro [K10]	FALSE	1	1	3	A0A7R8UHI6	A0A7R8UHI6 [17451-17460]; [17599-17608]; [19543-19552]; [19691-19700]		0	1728.95	1.06	1.134	1.069	119.8	113	105.6	16.63	20.94	25.05		High	High	High	High	High	High	High	High	High	High	High	High	High	High	High	High	High	High	High	High	High	High	High	High	High	High
	FALSE	High	[K].TPEDQVAEEVTIK.[K]	1xTMTpro [N-Term]; 1xDeamidated [Q5]; 1xTMTpro [K13]	FALSE	1	1	1	A0A7R8UHI6	A0A7R8UHI6 [17270-17282]; [19362-19374]		0	2068.13	1.029	1.337	1.299	129.2	125.5	96.6	17.39	22.09	20.69		n/a	n/a	n/a	n/a	n/a	n/a	n/a	n/a	High	High	High	High	n/a	n/a	n/a	n/a	n/a	n/a	n/a	n/a	High	High	High	High	n/a	n/a
	FALSE	High	[K].IEELPEQVTVFETVTK.[E]	1xTMTpro [N-Term]; 1xDeamidated [Q7]; 1xTMTpro [K16]	FALSE	1	1	2	A0A7R8UHI6	A0A7R8UHI6 [9510-9525]; [10160-10175]; [10595-10610]; [10885-10900]; [11175-11190]; [11320-11335]		0	2471.38	1.702	1.677	0.985	154	90.5	91.8	39.51	11.06	21.41		High	High	High	High	n/a	n/a	n/a	n/a	High	High	High	High	High	High	High	High	n/a	n/a	n/a	n/a	High	High	High	High	High	High
	FALSE	High	[K].TPEEEENEIVK.[L]	1xTMTpro [N-Term]; 1xTMTpro [K11]	FALSE	1	1	2	A0A7R8UHI6	A0A7R8UHI6 [14130-14140]		0	1925.04	1.427	1.481	1.038	147.3	103.2	99.5	58.52	23.56	25.91		n/a	n/a	n/a	n/a	High	High	High	High	High	High	High	High	n/a	n/a	n/a	n/a	High	High	High	High	High	High	High	High	n/a	n/a
	FALSE	High	[K].VVEQAPEEVIEEEVADVTIK.[K]	1xTMTpro [N-Term]; 1xDeamidated [Q4]; 1xTMTpro [K20]	FALSE	1	1	1	A0A7R8UHI6	A0A7R8UHI6 [17555-17574]; [19647-19666]		0	2835.54										No Quan Values	n/a	n/a	n/a	n/a	High	High	High	High	n/a	n/a	n/a	n/a	n/a	n/a	n/a	n/a	High	High	High	High	n/a	n/a	n/a	n/a	n/a	n/a
	FALSE	High	[K].EQPDIEDESIVEEIHEVTIK.[E]	1xTMTpro [N-Term]; 1xPhospho [S9]; 1xTMTpro [K20]	FALSE	1	1	1	A0A7R8UHI6	A0A7R8UHI6 [17056-17075]	A0A7R8UHI6 1xPhospho [S17064]	0	3040.53	0.908	1.714	1.887	170.3	187.4	99.3	25.23	15.29	12.91		High	High	High	High	n/a	n/a	n/a	n/a	n/a	n/a	n/a	n/a	High	High	High	High	n/a	n/a	n/a	n/a	n/a	n/a	n/a	n/a	High	High
	FALSE	High	[R].ELPEQVAVFETIAK.[D]	1xTMTpro [N-Term]; 1xDeamidated [Q5]; 1xTMTpro [K14]	FALSE	1	1	1	A0A7R8UHI6	A0A7R8UHI6 [11828-11841]		0	2183.25	1.551	1.198	0.773	113.2	73	94.5	29	18.34	30.3		n/a	n/a	n/a	n/a	n/a	n/a	n/a	n/a	High	High	High	High	n/a	n/a	n/a	n/a	n/a	n/a	n/a	n/a	High	High	High	High	n/a	n/a
	FALSE	High	[LK].VEELPEQITVLETVTK.[E]	1xTMTpro [N-Term]; 1xTMTpro [K16]	FALSE	1	1	2	A0A7R8UHI6	A0A7R8UHI6 [5300-5315]; [5809-5824]; [6006-6021]		0	2436.41	1.515	1.018	0.672	104.2	68.8	102.4	31.38	23.47	5.68		n/a	n/a	n/a	n/a	High	High	High	High	High	High	High	High	n/a	n/a	n/a	n/a	High	High	High	High	High	High	High	High	n/a	n/a
	FALSE	High	[K].TDLEQYEK.[T]	1xTMTpro [N-Term]; 1xTMTpro [K8]	FALSE	1	1	3	A0A7R8UHI6	A0A7R8UHI6 [13371-13378]; [13515-13522]; [14440-14447]; [14584-14591]; [14728-14735]; [14872-14879]; [15016-15023]; [15160-15167]; [15463-15470]; [15622-15629]; [15910-15917]		0	1633.89	0.497	0.765	1.539	74.3	149.4	97.1	34.92	38.32	21.33		High	High	High	High	High	High	High	High	High	High	High	High	High	High	High	High	High	High	High	High	High	High	High	High	High	High
	FALSE	High	[K].IETIEEDGK.[I]	1xTMTpro [N-Term]; 1xTMTpro [K9]	FALSE	1	1	1	A0A7R8UHI6	A0A7R8UHI6 [11942-11950]		0	1641.92										No Quan Values	n/a	n/a	n/a	n/a	High	High	High	High	n/a	n/a	n/a	n/a	n/a	n/a	n/a	n/a	High	High	High	High	n/a	n/a	n/a	n/a	n/a	n/a
	FALSE	High	[KE].VPEETHK.[LVI]	1xTMTpro [N-Term]; 1xTMTpro [K7]	FALSE	1	1	2	A0A7R8UHI6	A0A7R8UHI6 [2032-2038]; [2757-2763]; [3192-3198]; [3337-3343]; [3482-3488]; [3627-3633]; [3772-3778]; [3917-3923]; [4062-4068]; [4207-4213]; [4352-4358]; [4497-4503]; [4642-4648]; [4787-4793]; [4932-4938]; [5077-5083]; [5222-5228]; [5367-5373]; [5657-5663]; [5802-5808]; [5928-5934]; [6073-6079]; [6218-6224]; [6508-6514]; [6798-6804]; [7378-7384]; [7523-7529]; [8103-8109]; [8393-8399]; [8538-8544]…		0	1447.84	0.99	1.507	1.522	134.7	136	89.4	30.26	19.88	34.94		n/a	n/a	n/a	n/a	High	High	High	High	High	High	High	High	n/a	n/a	n/a	n/a	High	High	High	High	High	High	High	High	n/a	n/a
	FALSE	High	[K].TEVEEKPK.[K]	1xTMTpro [N-Term]; 2xTMTpro [K6; K8]	FALSE	1	1	2	A0A7R8UHI6	A0A7R8UHI6 [13091-13098]; [13235-13242]; [13379-13386]; [13523-13530]; [13667-13674]; [13811-13818]; [14448-14455]; [14592-14599]; [14736-14743]; [14880-14887]; [15024-15031]; [15168-15175]; [15312-15319]; [15471-15478]; [15630-15637]; [15774-15781]		0	1872.13	0.876	1.254	1.432	119.5	136.5	95.3	23.53	37.01	14.91		n/a	n/a	n/a	n/a	High	High	High	High	High	High	High	High	n/a	n/a	n/a	n/a	High	High	High	High	High	High	High	High	n/a	n/a
	FALSE	High	[K].EQVEDVQITLK.[K]	1xTMTpro [N-Term]; 1xTMTpro [K11]	FALSE	1	1	2	A0A7R8UHI6	A0A7R8UHI6 [17219-17229]		0	1910.11	1.037	1.05	1.013	104.2	100.5	99.2	11.57	6.72	4.35		n/a	n/a	n/a	n/a	High	High	High	High	High	High	High	High	n/a	n/a	n/a	n/a	High	High	High	High	High	High	High	High	n/a	n/a
	FALSE	High	[K].EVPVEEEVPVSVEELPEEVETVEVLDEEEKPK.[K]	1xTMTpro [N-Term]; 1xPhospho [T21]; 2xTMTpro [K30; K32]	FALSE	1	1	1	A0A7R8UHI6	A0A7R8UHI6 [13111-13142]	A0A7R8UHI6 1xPhospho [T13131]	0	4655.38										No Quan Values	High	High	High	High	n/a	n/a	n/a	n/a	n/a	n/a	n/a	n/a	High	High	High	High	n/a	n/a	n/a	n/a	n/a	n/a	n/a	n/a	High	High
	FALSE	High	[K].IEELPEQVTVFETITK.[E]	1xTMTpro [N-Term]; 1xDeamidated [Q7]; 1xTMTpro [K16]	FALSE	1	1	1	A0A7R8UHI6	A0A7R8UHI6 [10015-10030]; [10305-10320]; [10450-10465]; [10740-10755]; [11030-11045]; [11465-11480]; [11610-11625]		0	2485.39										No Quan Values	n/a	n/a	n/a	n/a	n/a	n/a	n/a	n/a	High	High	High	High	n/a	n/a	n/a	n/a	n/a	n/a	n/a	n/a	High	High	High	High	n/a	n/a
	FALSE	High	[K].DDVDEYIK.[SA]	1xTMTpro [N-Term]; 1xTMTpro [K8]	FALSE	1	1	1	A0A7R8UHI6	A0A7R8UHI6 [13210-13217]; [13354-13361]; [13498-13505]; [13642-13649]; [13786-13793]; [14567-14574]; [14711-14718]; [14855-14862]; [14999-15006]; [15143-15150]; [15287-15294]; [15446-15453]; [15605-15612]; [15749-15756]; [15893-15900]		0	1604.87	0.989	0.834	0.843	84.8	85.7	101.7	36.82	14.57	11.4		High	High	High	High	n/a	n/a	n/a	n/a	n/a	n/a	n/a	n/a	High	High	High	High	n/a	n/a	n/a	n/a	n/a	n/a	n/a	n/a	High	High
	FALSE	High	[K].SSSPEPDSQDEK.[T]	1xTMTpro [N-Term]; 1xPhospho [S3]; 1xTMTpro [K12]	FALSE	1	1	1	A0A7R8UHI6	A0A7R8UHI6 [14298-14309]	A0A7R8UHI6 1xPhospho [S14300]	0	1993.92	2.047	1.25	0.611	126.5	61.8	101.2	18.34	32.51	7.62		High	High	High	High	n/a	n/a	n/a	n/a	n/a	n/a	n/a	n/a	High	High	High	High	n/a	n/a	n/a	n/a	n/a	n/a	n/a	n/a	High	High
	FALSE	High	[K].TDLEQYEK.[T]	1xTMTpro [N-Term]; 1xDeamidated [Q5]; 1xTMTpro [K8]	FALSE	1	1	3	A0A7R8UHI6	A0A7R8UHI6 [13371-13378]; [13515-13522]; [14440-14447]; [14584-14591]; [14728-14735]; [14872-14879]; [15016-15023]; [15160-15167]; [15463-15470]; [15622-15629]; [15910-15917]		0	1634.88	1.341	2.217	1.653	201.7	150.4	91	22.26	38.27	27.81		High	High	High	High	High	High	High	High	n/a	n/a	n/a	n/a	High	High	High	High	High	High	High	High	n/a	n/a	n/a	n/a	High	High
	FALSE	High	[K].TELEQYEK.[V]	1xTMTpro [N-Term]; 1xDeamidated [Q5]; 1xTMTpro [K8]	FALSE	1	1	1	A0A7R8UHI6	A0A7R8UHI6 [16085-16092]		0	1648.89	1.129	2.069	1.833	181.8	161	87.9	20.84	37.1	27.25		High	High	High	High	n/a	n/a	n/a	n/a	n/a	n/a	n/a	n/a	High	High	High	High	n/a	n/a	n/a	n/a	n/a	n/a	n/a	n/a	High	High
	FALSE	High	[R].NVEEATK.[L]	1xTMTpro [N-Term]; 1xTMTpro [K7]	FALSE	1	1	2	A0A7R8UHI6	A0A7R8UHI6 [12719-12725]		0	1398.81	1.037	0.974	0.94	94.4	91.1	96.9	8.87	29.76	12.5		n/a	n/a	n/a	n/a	High	High	High	High	High	High	High	High	n/a	n/a	n/a	n/a	High	High	High	High	High	High	High	High	n/a	n/a
	FALSE	High	[K].TTTQDGK.[T]	1xTMTpro [N-Term]; 1xTMTpro [K7]	FALSE	1	1	2	A0A7R8UHI6	A0A7R8UHI6 [1977-1983]		0	1358.78	1.041	0.916	0.88	95.9	92.1	104.6	28.59	32.31	34.48		High	High	High	High	High	High	High	High	n/a	n/a	n/a	n/a	High	High	High	High	High	High	High	High	n/a	n/a	n/a	n/a	High	High
	FALSE	High	[K].TDLEEYEK.[T]	1xTMTpro [N-Term]; 1xTMTpro [K8]	FALSE	1	1	1	A0A7R8UHI6	A0A7R8UHI6 [13227-13234]; [13659-13666]; [13803-13810]; [15304-15311]; [15766-15773]		0	1634.88	1.331	2.354	1.769	212.9	160	90.4	21.03	41.25	28.58		n/a	n/a	n/a	n/a	n/a	n/a	n/a	n/a	High	High	High	High	n/a	n/a	n/a	n/a	n/a	n/a	n/a	n/a	High	High	High	High	n/a	n/a
FALSE	High	Master Protein	A0A7R8UGW0	Ig-like domain-containing protein OS=Hermetia illucens OX=343691 GN=HERILL_LOCUS3798 PE=4 SV=1	0	579.43	17	104	367	104	7325	832.2	5.68	9354	104	0	0.906	1.146	1.264	0.981244	0.671807	0.778498	109.8	121.2	95.8	16.97	25.97	20.59	High	High	High	1	Phospho [S6189]
	Checked	Confidence	Annotated Sequence	Modifications	Contaminant	# Protein Groups	# Proteins	# PSMs	Master Protein Accessions	Positions in Master Proteins	Modifications in Master Proteins	# Missed Cleavages	Theo. MH+ [Da]	Abundance Ratio: (10 mM FAC) / (100 mM FAC)	Abundance Ratio: (10 mM FAC) / (CNTRL)	Abundance Ratio: (100 mM FAC) / (CNTRL)	Abundances (Grouped): 10 mM FAC	Abundances (Grouped): 100 mM FAC	Abundances (Grouped): CNTRL	Abundances (Grouped) CV [%]: 10 mM FAC	Abundances (Grouped) CV [%]: 100 mM FAC	Abundances (Grouped) CV [%]: CNTRL	Quan Info	Found in Sample: F1: 128C, Sample, 5, 10 mM FAC	Found in Sample: F1: 129N, Sample, 6, 10 mM FAC	Found in Sample: F1: 129C, Sample, 7, 10 mM FAC	Found in Sample: F1: 130N, Sample, 8, 10 mM FAC	Found in Sample: F2: 128C, Sample, 5, 10 mM FAC	Found in Sample: F2: 129N, Sample, 6, 10 mM FAC	Found in Sample: F2: 129C, Sample, 7, 10 mM FAC	Found in Sample: F2: 130N, Sample, 8, 10 mM FAC	Found in Sample: F3: 128C, Sample, 5, 10 mM FAC	Found in Sample: F3: 129N, Sample, 6, 10 mM FAC	Found in Sample: F3: 129C, Sample, 7, 10 mM FAC	Found in Sample: F3: 130N, Sample, 8, 10 mM FAC	Found in Sample: F1: 130C, Sample, 9, 100 mM FAC	Found in Sample: F1: 131N, Sample, 10, 100 mM FAC	Found in Sample: F1: 131C, Sample, 11, 100 mM FAC	Found in Sample: F1: 132N, Sample, 12, 100 mM FAC	Found in Sample: F2: 130C, Sample, 9, 100 mM FAC	Found in Sample: F2: 131N, Sample, 10, 100 mM FAC	Found in Sample: F2: 131C, Sample, 11, 100 mM FAC	Found in Sample: F2: 132N, Sample, 12, 100 mM FAC	Found in Sample: F3: 130C, Sample, 9, 100 mM FAC	Found in Sample: F3: 131N, Sample, 10, 100 mM FAC	Found in Sample: F3: 131C, Sample, 11, 100 mM FAC	Found in Sample: F3: 132N, Sample, 12, 100 mM FAC	Found in Sample: F1: 126, Control, 1, CNTRL	Found in Sample: F1: 127N, Control, 2, CNTRL
	FALSE	High	[R].AVNNYGEDR.[T]	1xTMTpro [N-Term]	FALSE	1	1	3	A0A7R8UGW0	A0A7R8UGW0 [3889-3897]		0	1341.67	0.773	1.321	1.71	135.2	175	102.3	32.14	45.08	28.84		High	High	High	High	High	High	High	High	High	High	High	High	High	High	High	High	High	High	High	High	High	High	High	High	High	High
	FALSE	High	[R].AVNNYGEDR.[T]	1xTMTpro [N-Term]; 1xDeamidated [N3]	FALSE	1	1	1	A0A7R8UGW0	A0A7R8UGW0 [3889-3897]		0	1342.66	0.723	1.325	1.832	130.5	180.6	98.5	33	40.46	16.89		High	High	High	High	n/a	n/a	n/a	n/a	n/a	n/a	n/a	n/a	High	High	High	High	n/a	n/a	n/a	n/a	n/a	n/a	n/a	n/a	High	High
	FALSE	High	[R].AEDAGSYTVR.[A]	1xTMTpro [N-Term]	FALSE	1	1	5	A0A7R8UGW0	A0A7R8UGW0 [820-829]		0	1372.7	0.695	1.08	1.553	104.5	150.4	96.8	43.29	37.02	31.28		High	High	High	High	High	High	High	High	High	High	High	High	High	High	High	High	High	High	High	High	High	High	High	High	High	High
	FALSE	High	[K].LSYLEDESR.[F]	1xTMTpro [N-Term]	FALSE	1	1	3	A0A7R8UGW0	A0A7R8UGW0 [1938-1946]		0	1415.73	1.55	0.9	0.58	71.2	46	79.2	23.44	47.53	64.2		High	High	High	High	High	High	High	High	High	High	High	High	High	High	High	High	High	High	High	High	High	High	High	High	High	High
	FALSE	High	[K].EVVGDLEITR.[N]	1xTMTpro [N-Term]	FALSE	1	1	1	A0A7R8UGW0	A0A7R8UGW0 [4357-4366]		0	1434.81	1.683	1.407	0.836	118.5	70.4	84.2	43.57	50.9	55.47		n/a	n/a	n/a	n/a	High	High	High	High	n/a	n/a	n/a	n/a	n/a	n/a	n/a	n/a	High	High	High	High	n/a	n/a	n/a	n/a	n/a	n/a
	FALSE	High	[R].LEPVGDTTMR.[I]	1xTMTpro [N-Term]	FALSE	1	1	2	A0A7R8UGW0	A0A7R8UGW0 [916-925]		0	1422.76	0.484	1.106	2.285	107.6	222.4	97.3	49.54	44.25	37.11		High	High	High	High	n/a	n/a	n/a	n/a	High	High	High	High	High	High	High	High	n/a	n/a	n/a	n/a	High	High	High	High	High	High
	FALSE	High	[R].VEPVNDPTLR.[I]	1xTMTpro [N-Term]	FALSE	1	1	2	A0A7R8UGW0	A0A7R8UGW0 [3703-3712]		0	1443.81	0.878	1.289	1.468	131	149.2	101.6	27.22	41.59	22.61		High	High	High	High	n/a	n/a	n/a	n/a	High	High	High	High	High	High	High	High	n/a	n/a	n/a	n/a	High	High	High	High	High	High
	FALSE	High	[K].IQTLEDSLVR.[T]	1xTMTpro [N-Term]	FALSE	1	1	3	A0A7R8UGW0	A0A7R8UGW0 [3381-3390]		0	1477.85	1.842	0.978	0.531	73.9	40.1	75.5	42.54	25.83	67.2		High	High	High	High	High	High	High	High	High	High	High	High	High	High	High	High	High	High	High	High	High	High	High	High	High	High
	FALSE	High	[K].CSANLVVEER.[R]	1xCarbamidomethyl [C1]; 1xTMTpro [N-Term]	FALSE	1	1	3	A0A7R8UGW0	A0A7R8UGW0 [4480-4489]		0	1480.77	0.714	1.022	1.43	103.8	145.4	101.6	24.59	27.16	12.79		High	High	High	High	High	High	High	High	High	High	High	High	High	High	High	High	High	High	High	High	High	High	High	High	High	High
	FALSE	High	[R].EGENVHFEAR.[L]	1xTMTpro [N-Term]	FALSE	1	1	3	A0A7R8UGW0	A0A7R8UGW0 [3418-3427]		0	1491.75	0.659	1.31	1.987	127.2	193	97.1	44.48	47.32	41.64		High	High	High	High	High	High	High	High	High	High	High	High	High	High	High	High	High	High	High	High	High	High	High	High	High	High
	FALSE	High	[R].AEDAGQYTVVAR.[N]	1xTMTpro [N-Term]	FALSE	1	1	3	A0A7R8UGW0	A0A7R8UGW0 [1093-1104]		0	1583.83	0.753	1.259	1.672	128	169.9	101.6	41.99	41.78	34.63		High	High	High	High	High	High	High	High	High	High	High	High	High	High	High	High	High	High	High	High	High	High	High	High	High	High
	FALSE	High	[K].IQETDQALQDR.[Y]	1xTMTpro [N-Term]	FALSE	1	1	2	A0A7R8UGW0	A0A7R8UGW0 [2870-2880]		0	1620.85	0.921	1.55	1.683	155.8	169.2	100.6	35.67	38.88	10.78		High	High	High	High	n/a	n/a	n/a	n/a	High	High	High	High	High	High	High	High	n/a	n/a	n/a	n/a	High	High	High	High	High	High
	FALSE	High	[R].IEEVQVVEEQR.[D]	1xTMTpro [N-Term]	FALSE	1	1	3	A0A7R8UGW0	A0A7R8UGW0 [6202-6212]		0	1661.9	1.55	1.136	0.733	109.6	70.7	96.5	31.06	30.18	10.85		High	High	High	High	High	High	High	High	High	High	High	High	High	High	High	High	High	High	High	High	High	High	High	High	High	High
	FALSE	High	[R].IEEIDETTK.[Q]	1xTMTpro [N-Term]; 1xTMTpro [K9]	FALSE	1	1	4	A0A7R8UGW0	A0A7R8UGW0 [1550-1558]		0	1685.95	0.717	1.613	2.25	160.4	223.8	99.5	34.71	46.61	30.81		High	High	High	High	High	High	High	High	High	High	High	High	High	High	High	High	High	High	High	High	High	High	High	High	High	High
	FALSE	High	[K].EEVEEIPEK.[G]	1xTMTpro [N-Term]; 1xTMTpro [K9]	FALSE	1	1	4	A0A7R8UGW0	A0A7R8UGW0 [5970-5978]		0	1709.95	0.974	1.658	1.702	160.3	164.6	96.7	10.67	21.91	13.63		High	High	High	High	High	High	High	High	High	High	High	High	High	High	High	High	High	High	High	High	High	High	High	High	High	High
	FALSE	High	[K].YECVAVNSGGEAR.[C]	1xTMTpro [N-Term]; 1xCarbamidomethyl [C3]	FALSE	1	1	3	A0A7R8UGW0	A0A7R8UGW0 [4570-4582]		0	1715.83	0.705	1.381	1.96	141.2	200.4	102.3	15.89	33.96	36.49		High	High	High	High	High	High	High	High	High	High	High	High	High	High	High	High	High	High	High	High	High	High	High	High	High	High
	FALSE	High	[R].NITATETTEVEHR.[G]	1xTMTpro [N-Term]	FALSE	1	1	6	A0A7R8UGW0	A0A7R8UGW0 [4367-4379]		0	1804.94	1.14	1.363	1.195	134.5	118	98.7	32.94	21.28	9.13		High	High	High	High	High	High	High	High	High	High	High	High	High	High	High	High	High	High	High	High	High	High	High	High	High	High
	FALSE	High	[R].NITATETTEVEHR.[G]	1xDeamidated [N1]; 1xTMTpro [N-Term]	FALSE	1	1	1	A0A7R8UGW0	A0A7R8UGW0 [4367-4379]		0	1805.92										No Quan Values	n/a	n/a	n/a	n/a	High	High	High	High	n/a	n/a	n/a	n/a	n/a	n/a	n/a	n/a	High	High	High	High	n/a	n/a	n/a	n/a	n/a	n/a
	FALSE	High	[K].YVNPEDSGTYTCR.[A]	1xTMTpro [N-Term]; 1xCarbamidomethyl [C12]	FALSE	1	1	1	A0A7R8UGW0	A0A7R8UGW0 [1757-1769]		0	1865.87										No Quan Values	High	High	High	High	n/a	n/a	n/a	n/a	n/a	n/a	n/a	n/a	High	High	High	High	n/a	n/a	n/a	n/a	n/a	n/a	n/a	n/a	High	High
	FALSE	High	[K].STVTGDLEIPEQQR.[Y]	1xTMTpro [N-Term]	FALSE	1	1	2	A0A7R8UGW0	A0A7R8UGW0 [849-862]		0	1876.99	1.363	0.953	0.7	95.6	70.2	100.3	22.6	8.01	20.57		High	High	High	High	High	High	High	High	n/a	n/a	n/a	n/a	High	High	High	High	High	High	High	High	n/a	n/a	n/a	n/a	High	High
	FALSE	High	[K].STVTGDLEIPEQQR.[Y]	1xTMTpro [N-Term]; 1xDeamidated [Q12]	FALSE	1	1	3	A0A7R8UGW0	A0A7R8UGW0 [849-862]		0	1877.98	2.607	2.599	0.997	248	95.1	95.4	32.98	21.77	34.96		High	High	High	High	High	High	High	High	High	High	High	High	High	High	High	High	High	High	High	High	High	High	High	High	High	High
	FALSE	High	[K].EGIIEQTQHPK.[G]	1xTMTpro [N-Term]; 1xDeamidated [Q8]; 1xTMTpro [K11]	FALSE	1	1	1	A0A7R8UGW0	A0A7R8UGW0 [2991-3001]		0	1889.06	1.606	2.049	1.276	200	124.5	97.6	37.13	23.46	9.3		n/a	n/a	n/a	n/a	n/a	n/a	n/a	n/a	High	High	High	High	n/a	n/a	n/a	n/a	n/a	n/a	n/a	n/a	High	High	High	High	n/a	n/a
	FALSE	High	[K].EGIIEQTQHPK.[G]	1xTMTpro [N-Term]; 2xDeamidated [Q6; Q8]; 1xTMTpro [K11]	FALSE	1	1	2	A0A7R8UGW0	A0A7R8UGW0 [2991-3001]		0	1890.05	2.237	3.022	1.351	285.8	127.8	94.6	52.14	29.39	12.7		High	High	High	High	n/a	n/a	n/a	n/a	High	High	High	High	High	High	High	High	n/a	n/a	n/a	n/a	High	High	High	High	High	High
	FALSE	High	[R].REEEELEVTQPPR.[F]	1xTMTpro [N-Term]	FALSE	1	1	4	A0A7R8UGW0	A0A7R8UGW0 [1816-1828]		1	1916	0.743	1.271	1.709	119.1	160.2	93.7	48.04	51.46	39.94		High	High	High	High	High	High	High	High	High	High	High	High	High	High	High	High	High	High	High	High	High	High	High	High	High	High
	FALSE	High	[R].ATNEYGEAVTTATMR.[V]	1xTMTpro [N-Term]	FALSE	1	1	2	A0A7R8UGW0	A0A7R8UGW0 [3481-3495]		0	1918.95	0.75	1.431	1.908	149.2	198.9	104.3	41.23	43.38	26.63		High	High	High	High	n/a	n/a	n/a	n/a	High	High	High	High	High	High	High	High	n/a	n/a	n/a	n/a	High	High	High	High	High	High
	FALSE	High	[R].ATNEYGEAVTTATMR.[V]	1xTMTpro [N-Term]; 1xDeamidated [N3]	FALSE	1	1	1	A0A7R8UGW0	A0A7R8UGW0 [3481-3495]		0	1919.93	0.682	1.489	2.185	156.4	229.4	105	39.82	43.63	29.97		n/a	n/a	n/a	n/a	High	High	High	High	n/a	n/a	n/a	n/a	n/a	n/a	n/a	n/a	High	High	High	High	n/a	n/a	n/a	n/a	n/a	n/a
	FALSE	High	[R].EEILTDEEQPNPPR.[F]	1xTMTpro [N-Term]	FALSE	1	1	6	A0A7R8UGW0	A0A7R8UGW0 [3667-3680]		0	1971	0.621	1.061	1.707	108	173.8	101.8	31.61	47.29	22.04		High	High	High	High	High	High	High	High	High	High	High	High	High	High	High	High	High	High	High	High	High	High	High	High	High	High
	FALSE	High	[R].EEILTDEEQPNPPR.[F]	1xTMTpro [N-Term]; 1xDeamidated [Q9]	FALSE	1	1	1	A0A7R8UGW0	A0A7R8UGW0 [3667-3680]		0	1971.98	0.667	0.973	1.459	106.4	159.6	109.4	33.33	47.56	20.94		n/a	n/a	n/a	n/a	n/a	n/a	n/a	n/a	High	High	High	High	n/a	n/a	n/a	n/a	n/a	n/a	n/a	n/a	High	High	High	High	n/a	n/a
	FALSE	High	[K].REEILTDEEQPNPPR.[F]	1xTMTpro [N-Term]	FALSE	1	1	5	A0A7R8UGW0	A0A7R8UGW0 [3666-3680]		1	2127.1	0.753	1.166	1.549	121.9	161.9	104.5	25.74	37.1	14.37		High	High	High	High	High	High	High	High	High	High	High	High	High	High	High	High	High	High	High	High	High	High	High	High	High	High
	FALSE	High	[K].TEQPVPTEEEKPTDSADVK.[Q]	1xTMTpro [N-Term]; 2xTMTpro [K11; K19]	FALSE	1	1	1	A0A7R8UGW0	A0A7R8UGW0 [5611-5629]		0	3012.62	0.707	1.481	2.093	124.8	176.4	84.3	42.39	45.95	48.05		n/a	n/a	n/a	n/a	High	High	High	High	n/a	n/a	n/a	n/a	n/a	n/a	n/a	n/a	High	High	High	High	n/a	n/a	n/a	n/a	n/a	n/a
	FALSE	High	[R].SDVVTETQNEQSMEQIQMLEDSSR.[R]	1xTMTpro [N-Term]	FALSE	1	1	6	A0A7R8UGW0	A0A7R8UGW0 [1256-1279]		0	3088.44	0.971	0.94	0.968	92.6	95.4	98.5	19.09	15.96	16.11		High	High	High	High	n/a	n/a	n/a	n/a	High	High	High	High	High	High	High	High	n/a	n/a	n/a	n/a	High	High	High	High	High	High
	FALSE	High	[R].SDVVTETQNEQSMEQIQMLEDSSR.[R]	1xTMTpro [N-Term]; 1xDeamidated [N/Q]	FALSE	1	1	9	A0A7R8UGW0	A0A7R8UGW0 [1256-1279]		0	3089.42	1.245	1.546	1.242	143.9	115.6	93.1	30.63	24.71	23.69		High	High	High	High	High	High	High	High	High	High	High	High	High	High	High	High	High	High	High	High	High	High	High	High	High	High
	FALSE	High	[R].SDVVTETQNEQSMEQIQMLEDSSR.[R]	1xTMTpro [N-Term]; 1xOxidation [M]	FALSE	1	1	6	A0A7R8UGW0	A0A7R8UGW0 [1256-1279]		0	3104.43	0.87	1.106	1.271	113	129.9	102.2	27.1	35.96	8.53		High	High	High	High	High	High	High	High	High	High	High	High	High	High	High	High	High	High	High	High	High	High	High	High	High	High
	FALSE	High	[R].SDVVTETQNEQSMEQIQMLEDSSR.[R]	1xTMTpro [N-Term]; 1xOxidation [M13]; 1xDeamidated [Q]	FALSE	1	1	3	A0A7R8UGW0	A0A7R8UGW0 [1256-1279]		0	3105.42	1.17	1.348	1.152	131.6	112.5	97.7	16.74	19.73	11.79		High	High	High	High	High	High	High	High	n/a	n/a	n/a	n/a	High	High	High	High	High	High	High	High	n/a	n/a	n/a	n/a	High	High
	FALSE	High	[R].EEVTTQPETEETEVEEFKK.[E]	1xTMTpro [N-Term]; 2xTMTpro [K18; K19]	FALSE	1	1	1	A0A7R8UGW0	A0A7R8UGW0 [6231-6249]		1	3194.68	0.974	1.055	1.082	99.1	101.7	94	34.51	37.15	45.97		n/a	n/a	n/a	n/a	n/a	n/a	n/a	n/a	High	High	High	High	n/a	n/a	n/a	n/a	n/a	n/a	n/a	n/a	High	High	High	High	n/a	n/a
	FALSE	High	[R].IGQAQSSIR.[L]	1xTMTpro [N-Term]	FALSE	1	1	3	A0A7R8UGW0	A0A7R8UGW0 [1908-1916]		0	1263.73	0.629	1.186	1.885	93	147.8	78.4	35.79	45.53	65.38		High	High	High	High	High	High	High	High	High	High	High	High	High	High	High	High	High	High	High	High	High	High	High	High	High	High
	FALSE	High	[K].IQYLEDTSR.[Y]	1xTMTpro [N-Term]	FALSE	1	1	2	A0A7R8UGW0	A0A7R8UGW0 [1404-1412]		0	1428.77	1.268	0.93	0.733	73.7	58.1	79.3	21.73	17.98	60.92		High	High	High	High	n/a	n/a	n/a	n/a	High	High	High	High	High	High	High	High	n/a	n/a	n/a	n/a	High	High	High	High	High	High
	FALSE	High	[R].LEPMGDPTMR.[V]	1xTMTpro [N-Term]	FALSE	1	1	1	A0A7R8UGW0	A0A7R8UGW0 [1184-1193]		0	1450.74	0.667	1.255	1.881	126.9	190.1	101.1	32.34	40.47	16.58		n/a	n/a	n/a	n/a	n/a	n/a	n/a	n/a	High	High	High	High	n/a	n/a	n/a	n/a	n/a	n/a	n/a	n/a	High	High	High	High	n/a	n/a
	FALSE	High	[R].ATNLYGMDETR.[A]	1xTMTpro [N-Term]	FALSE	1	1	3	A0A7R8UGW0	A0A7R8UGW0 [4033-4043]		0	1574.78	0.917	0.954	1.04	85.3	92.9	89.3	22.59	13.88	36.94		High	High	High	High	High	High	High	High	High	High	High	High	High	High	High	High	High	High	High	High	High	High	High	High	High	High
	FALSE	High	[R].DVNQYEGGK.[I]	1xTMTpro [N-Term]; 1xTMTpro [K9]	FALSE	1	1	2	A0A7R8UGW0	A0A7R8UGW0 [628-636]		0	1617.87	0.832	1.462	1.757	138.3	166.2	94.6	16.39	22.7	19.52		High	High	High	High	n/a	n/a	n/a	n/a	High	High	High	High	High	High	High	High	n/a	n/a	n/a	n/a	High	High	High	High	High	High
	FALSE	High	[K].AEVPEQPVVK.[K]	1xTMTpro [N-Term]; 1xTMTpro [K10]	FALSE	1	1	3	A0A7R8UGW0	A0A7R8UGW0 [6029-6038]		0	1704.02	1.029	1.245	1.21	121.1	117.7	97.3	9.67	22.49	15.69		High	High	High	High	High	High	High	High	High	High	High	High	High	High	High	High	High	High	High	High	High	High	High	High	High	High
	FALSE	High	[K].VEELEAYQK.[S]	1xTMTpro [N-Term]; 1xTMTpro [K9]	FALSE	1	1	2	A0A7R8UGW0	A0A7R8UGW0 [867-875]		0	1716.97	1.422	1.081	0.76	105.9	74.5	97.9	36.2	15.45	14.84		High	High	High	High	High	High	High	High	n/a	n/a	n/a	n/a	High	High	High	High	High	High	High	High	n/a	n/a	n/a	n/a	High	High
	FALSE	High	[R].DDDSAIYTCK.[A]	1xTMTpro [N-Term]; 1xCarbamidomethyl [C9]; 1xTMTpro [K10]	FALSE	1	1	1	A0A7R8UGW0	A0A7R8UGW0 [2692-2701]		0	1795.9	0.519	1.534	2.956	146.7	282.6	95.6	33.81	42.4	17.43		High	High	High	High	n/a	n/a	n/a	n/a	n/a	n/a	n/a	n/a	High	High	High	High	n/a	n/a	n/a	n/a	n/a	n/a	n/a	n/a	High	High
	FALSE	High	[R].VTSSAGQVESSAK.[L]	1xTMTpro [N-Term]; 1xTMTpro [K13]	FALSE	1	1	5	A0A7R8UGW0	A0A7R8UGW0 [4782-4794]		0	1859.04	0.976	1.322	1.354	127.6	130.7	96.5	4.93	30.76	14.36		High	High	High	High	High	High	High	High	High	High	High	High	High	High	High	High	High	High	High	High	High	High	High	High	High	High
	FALSE	High	[K].ASIQLDTQHPEGMR.[R]	1xTMTpro [N-Term]	FALSE	1	1	3	A0A7R8UGW0	A0A7R8UGW0 [2455-2468]		0	1886.97	0.933	0.801	0.859	79.5	85.2	99.2	37.92	22.85	28.56		High	High	High	High	High	High	High	High	High	High	High	High	High	High	High	High	High	High	High	High	High	High	High	High	High	High
	FALSE	High	[R].GMAQNYEESLEK.[T]	1xTMTpro [N-Term]; 1xDeamidated [Q4]; 1xTMTpro [K12]	FALSE	1	1	2	A0A7R8UGW0	A0A7R8UGW0 [4306-4317]		0	2008.02	1.7	1.593	0.937	135.5	79.7	85	29.19	11.23	44.65		n/a	n/a	n/a	n/a	High	High	High	High	High	High	High	High	n/a	n/a	n/a	n/a	High	High	High	High	High	High	High	High	n/a	n/a
	FALSE	High	[K].GAEGLEGIQNLEESLR.[R]	1xTMTpro [N-Term]	FALSE	1	1	10	A0A7R8UGW0	A0A7R8UGW0 [3002-3017]		0	2019.07	1.244	0.988	0.794	93	74.8	94.2	41.22	46.94	32.3		High	High	High	High	High	High	High	High	High	High	High	High	High	High	High	High	High	High	High	High	High	High	High	High	High	High
	FALSE	High	[K].GAEGLEGIQNLEESLR.[R]	1xTMTpro [N-Term]; 1xDeamidated [N/Q]	FALSE	1	1	3	A0A7R8UGW0	A0A7R8UGW0 [3002-3017]		0	2020.05										No Quan Values	High	High	High	High	High	High	High	High	High	High	High	High	High	High	High	High	High	High	High	High	High	High	High	High	High	High
	FALSE	High	[R].ISEAFPEDEGTYK.[C]	1xTMTpro [N-Term]; 1xTMTpro [K13]	FALSE	1	1	6	A0A7R8UGW0	A0A7R8UGW0 [4668-4680]		0	2094.09	0.959	1.23	1.283	125.7	131.1	102.2	12.67	22.06	14.56		High	High	High	High	High	High	High	High	High	High	High	High	High	High	High	High	High	High	High	High	High	High	High	High	High	High
	FALSE	High	[K].YVQEIPESTQPPEFK.[T]	1xTMTpro [N-Term]; 1xTMTpro [K15]	FALSE	1	1	5	A0A7R8UGW0	A0A7R8UGW0 [881-895]		0	2400.29	1.151	1.038	0.902	103.1	89.6	99.4	37.35	18.96	19.05		High	High	High	High	High	High	High	High	High	High	High	High	High	High	High	High	High	High	High	High	High	High	High	High	High	High
	FALSE	High	[K].DVALIEEVVEHTAEEK.[L]	1xTMTpro [N-Term]; 1xTMTpro [K16]	FALSE	1	1	8	A0A7R8UGW0	A0A7R8UGW0 [6150-6165]		0	2419.32	2.772	1.285	0.463	136.8	49.4	106.5	40.82	45.07	16.25		High	High	High	High	High	High	High	High	High	High	High	High	High	High	High	High	High	High	High	High	High	High	High	High	High	High
	FALSE	High	[R].ELERPTTSQTAGPPTPVAEPPK.[F]	1xTMTpro [N-Term]; 1xDeamidated [Q9]; 1xTMTpro [K22]	FALSE	1	1	2	A0A7R8UGW0	A0A7R8UGW0 [3246-3267]		0	2912.59	1.883	1.607	0.854	158.7	84.3	98.8	79.24	25.99	40.97		n/a	n/a	n/a	n/a	High	High	High	High	High	High	High	High	n/a	n/a	n/a	n/a	High	High	High	High	High	High	High	High	n/a	n/a
	FALSE	High	[R].LGEAISTATMR.[I]	1xTMTpro [N-Term]	FALSE	1	1	5	A0A7R8UGW0	A0A7R8UGW0 [834-844]		0	1453.8	0.852	0.917	1.077	86.5	101.6	94.3	6.61	26.22	23.83		High	High	High	High	High	High	High	High	High	High	High	High	High	High	High	High	High	High	High	High	High	High	High	High	High	High
	FALSE	High	[K].IEPVTDSNLK.[V]	1xTMTpro [N-Term]; 1xTMTpro [K10]	FALSE	1	1	1	A0A7R8UGW0	A0A7R8UGW0 [1451-1460]		0	1724.01	0.864	1.154	1.335	116.1	134.3	100.6	16.95	10.65	13.27		High	High	High	High	n/a	n/a	n/a	n/a	n/a	n/a	n/a	n/a	High	High	High	High	n/a	n/a	n/a	n/a	n/a	n/a	n/a	n/a	High	High
	FALSE	High	[R].VEPQNDLTMK.[I]	1xTMTpro [N-Term]; 1xTMTpro [K10]	FALSE	1	1	2	A0A7R8UGW0	A0A7R8UGW0 [1050-1059]		0	1782.99	0.835	1.398	1.676	131.6	157.7	94.1	24.71	34.47	33.23		High	High	High	High	High	High	High	High	n/a	n/a	n/a	n/a	High	High	High	High	High	High	High	High	n/a	n/a	n/a	n/a	High	High
	FALSE	High	[R].SIILDTQHPDGLEK.[I]	1xTMTpro [N-Term]; 1xTMTpro [K14]	FALSE	1	1	5	A0A7R8UGW0	A0A7R8UGW0 [2189-2202]		0	2174.23	1.239	1.049	0.847	102.1	82.4	97.3	39.77	42.98	25.82		High	High	High	High	High	High	High	High	High	High	High	High	High	High	High	High	High	High	High	High	High	High	High	High	High	High
	FALSE	High	[K].FVEPQYDIEEISK.[S]	1xTMTpro [N-Term]; 1xDeamidated [Q5]; 1xTMTpro [K13]	FALSE	1	1	4	A0A7R8UGW0	A0A7R8UGW0 [1145-1157]		0	2206.18	3.821	2.899	0.759	291.2	76.2	100.5	41.38	7.95	4.73		High	High	High	High	High	High	High	High	High	High	High	High	High	High	High	High	High	High	High	High	High	High	High	High	High	High
	FALSE	High	[R].FEVEFDGEPLPTVK.[W]	1xTMTpro [N-Term]; 1xTMTpro [K14]	FALSE	1	1	9	A0A7R8UGW0	A0A7R8UGW0 [4416-4429]		0	2215.21	0.978	1.176	1.202	112	114.5	95.3	3.69	18.32	10.96		High	High	High	High	High	High	High	High	High	High	High	High	High	High	High	High	High	High	High	High	High	High	High	High	High	High
	FALSE	High	[K].GSIISEPQHPEGLEK.[I]	1xTMTpro [N-Term]; 1xTMTpro [K15]	FALSE	1	1	1	A0A7R8UGW0	A0A7R8UGW0 [2321-2335]		0	2229.24	1.098	1.305	1.188	127.8	116.4	98	36.22	52.1	25.18		High	High	High	High	n/a	n/a	n/a	n/a	n/a	n/a	n/a	n/a	High	High	High	High	n/a	n/a	n/a	n/a	n/a	n/a	n/a	n/a	High	High
	FALSE	High	[K].GSIISEPQHPEGLEK.[I]	1xTMTpro [N-Term]; 1xDeamidated [Q8]; 1xTMTpro [K15]	FALSE	1	1	1	A0A7R8UGW0	A0A7R8UGW0 [2321-2335]		0	2230.22										No Quan Values	n/a	n/a	n/a	n/a	High	High	High	High	n/a	n/a	n/a	n/a	n/a	n/a	n/a	n/a	High	High	High	High	n/a	n/a	n/a	n/a	n/a	n/a
	FALSE	High	[K].SAISGEPLLPESWEK.[I]	1xTMTpro [N-Term]; 1xTMTpro [K15]	FALSE	1	1	8	A0A7R8UGW0	A0A7R8UGW0 [2587-2601]		0	2251.25	1.171	1.026	0.876	95.4	81.5	93	35.08	18.79	31.31		High	High	High	High	High	High	High	High	High	High	High	High	High	High	High	High	High	High	High	High	High	High	High	High	High	High
	FALSE	High	[R].AEPQDQPISPPSFITELR.[G]	1xTMTpro [N-Term]	FALSE	1	1	1	A0A7R8UGW0	A0A7R8UGW0 [2215-2232]		0	2329.24	1.032	1.037	1.004	103.1	99.9	99.5	23	14.49	6.2		n/a	n/a	n/a	n/a	n/a	n/a	n/a	n/a	High	High	High	High	n/a	n/a	n/a	n/a	n/a	n/a	n/a	n/a	High	High	High	High	n/a	n/a
	FALSE	High	[R].LSETQPLHLEGTVEPK.[E]	1xTMTpro [N-Term]; 1xTMTpro [K16]	FALSE	1	1	3	A0A7R8UGW0	A0A7R8UGW0 [2907-2922]		0	2386.35	0.693	1.138	1.643	106	153	93.2	9.98	40.69	21.32		High	High	High	High	High	High	High	High	High	High	High	High	High	High	High	High	High	High	High	High	High	High	High	High	High	High
	FALSE	High	[K].HGIISETQLPAGMTAEK.[L]	1xTMTpro [N-Term]; 1xTMTpro [K17]	FALSE	1	1	3	A0A7R8UGW0	A0A7R8UGW0 [3775-3791]		0	2391.32										No Quan Values	High	High	High	High	High	High	High	High	High	High	High	High	High	High	High	High	High	High	High	High	High	High	High	High	High	High
	FALSE	High	[R].ESVQEEIITQAPVFTMPVR.[D]	1xTMTpro [N-Term]	FALSE	1	1	5	A0A7R8UGW0	A0A7R8UGW0 [1683-1701]		0	2478.32	1.079	0.997	0.924	94.8	87.8	95.1	8.81	4.49	16.55		High	High	High	High	n/a	n/a	n/a	n/a	High	High	High	High	High	High	High	High	n/a	n/a	n/a	n/a	High	High	High	High	High	High
	FALSE	High	[R].ESVQEEIITQAPVFTMPVR.[D]	1xTMTpro [N-Term]; 1xDeamidated [Q10]	FALSE	1	1	5	A0A7R8UGW0	A0A7R8UGW0 [1683-1701]		0	2479.31	1	0.967	0.967	95.4	95.4	98.7	20.81	20.69	14.68		High	High	High	High	High	High	High	High	High	High	High	High	High	High	High	High	High	High	High	High	High	High	High	High	High	High
	FALSE	High	[R].ASDSGWYQCTAQNVAGSTATR.[A]	1xTMTpro [N-Term]; 1xCarbamidomethyl [C9]	FALSE	1	1	2	A0A7R8UGW0	A0A7R8UGW0 [538-558]		0	2535.19	0.831	0.686	0.825	59	70.9	86	15.09	4.32	38.9		High	High	High	High	n/a	n/a	n/a	n/a	High	High	High	High	High	High	High	High	n/a	n/a	n/a	n/a	High	High	High	High	High	High
	FALSE	High	[R].ITTDEFTPQQYAEVEDINLLK.[L]	1xTMTpro [N-Term]; 1xDeamidated [Q]; 1xTMTpro [K21]	FALSE	1	1	3	A0A7R8UGW0	A0A7R8UGW0 [5227-5247]		0	3076.62	0.878	0.615	0.7	61.2	69.7	99.5	13.33	23.07	34.8		High	High	High	High	High	High	High	High	n/a	n/a	n/a	n/a	High	High	High	High	High	High	High	High	n/a	n/a	n/a	n/a	High	High
	FALSE	High	[K].GTASTSGTLK.[C]	1xTMTpro [N-Term]; 1xTMTpro [K10]	FALSE	1	1	4	A0A7R8UGW0	A0A7R8UGW0 [2838-2847]		0	1530.9	0.75	1.979	2.637	213.4	284.4	107.8	49.81	50.91	26.29		High	High	High	High	High	High	High	High	High	High	High	High	High	High	High	High	High	High	High	High	High	High	High	High	High	High
	FALSE	High	[K].ANLILDSQLPR.[G]	1xTMTpro [N-Term]	FALSE	1	1	3	A0A7R8UGW0	A0A7R8UGW0 [3362-3372]		0	1543.91	1.058	0.965	0.912	93.5	88.4	96.9	28.68	8.97	20.22		High	High	High	High	High	High	High	High	High	High	High	High	High	High	High	High	High	High	High	High	High	High	High	High	High	High
	FALSE	High	[K].APVLVEPLK.[N]	1xTMTpro [N-Term]; 1xTMTpro [K9]	FALSE	1	1	3	A0A7R8UGW0	A0A7R8UGW0 [4608-4616]		0	1574.02	1.008	1.23	1.22	125.4	124.3	101.9	8.95	9.67	12.35		High	High	High	High	High	High	High	High	High	High	High	High	High	High	High	High	High	High	High	High	High	High	High	High	High	High
	FALSE	High	[R].SIILESQLPK.[G]	1xTMTpro [N-Term]; 1xTMTpro [K10]	FALSE	1	1	1	A0A7R8UGW0	A0A7R8UGW0 [3501-3510]		0	1736.08	1.063	0.82	0.771	77.5	72.9	94.5	30.59	28.94	36.42		n/a	n/a	n/a	n/a	High	High	High	High	n/a	n/a	n/a	n/a	n/a	n/a	n/a	n/a	High	High	High	High	n/a	n/a	n/a	n/a	n/a	n/a
	FALSE	High	[R].SIILESQLPK.[G]	1xTMTpro [N-Term]; 1xDeamidated [Q7]; 1xTMTpro [K10]	FALSE	1	1	4	A0A7R8UGW0	A0A7R8UGW0 [3501-3510]		0	1737.07	1.901	1.534	0.807	137.5	72.3	89.6	41.01	8.64	20.32		High	High	High	High	High	High	High	High	High	High	High	High	High	High	High	High	High	High	High	High	High	High	High	High	High	High
	FALSE	High	[K].LIEGSDALFTAK.[V]	1xTMTpro [N-Term]; 1xTMTpro [K12]	FALSE	1	1	3	A0A7R8UGW0	A0A7R8UGW0 [268-279]		0	1873.09	0.786	0.93	1.184	79.2	100.8	85.1	20.36	25.4	42.69		High	High	High	High	High	High	High	High	High	High	High	High	High	High	High	High	High	High	High	High	High	High	High	High	High	High
	FALSE	High	[R].IEWLVNGNPVK.[T]	1xTMTpro [N-Term]; 1xTMTpro [K11]	FALSE	1	1	4	A0A7R8UGW0	A0A7R8UGW0 [1327-1337]		0	1877.11	0.846	1.141	1.349	110.4	130.5	96.8	15.05	32	14.92		High	High	High	High	High	High	High	High	High	High	High	High	High	High	High	High	High	High	High	High	High	High	High	High	High	High
	FALSE	High	[R].IEWLVNGNPVK.[T]	1xTMTpro [N-Term]; 1xDeamidated [N6]; 1xTMTpro [K11]	FALSE	1	1	8	A0A7R8UGW0	A0A7R8UGW0 [1327-1337]		0	1878.1	0.726	0.883	1.216	95.5	131.5	108.1	27.68	48.09	28.52		High	High	High	High	High	High	High	High	High	High	High	High	High	High	High	High	High	High	High	High	High	High	High	High	High	High
	FALSE	High	[R].SETLMQMEAAIK.[K]	1xTMTpro [N-Term]; 1xTMTpro [K12]	FALSE	1	1	2	A0A7R8UGW0	A0A7R8UGW0 [3923-3934]		0	1960.07	1.021	0.842	0.825	69.1	67.7	82.2	22.97	5.3	46.33		High	High	High	High	High	High	High	High	n/a	n/a	n/a	n/a	High	High	High	High	High	High	High	High	n/a	n/a	n/a	n/a	High	High
	FALSE	High	[R].SLGPAHPPQIQTK.[Q]	1xTMTpro [N-Term]; 1xTMTpro [K13]	FALSE	1	1	4	A0A7R8UGW0	A0A7R8UGW0 [250-262]		0	1982.17	0.657	1.113	1.696	107.7	164	96.7	64.24	39.42	20.72		High	High	High	High	High	High	High	High	High	High	High	High	High	High	High	High	High	High	High	High	High	High	High	High	High	High
	FALSE	High	[K].GGVYLDSLQPDSLPK.[I]	1xTMTpro [N-Term]; 1xTMTpro [K15]	FALSE	1	1	2	A0A7R8UGW0	A0A7R8UGW0 [3229-3243]		0	2197.24	1.139	0.842	0.739	80.5	70.7	95.6	11.57	6.43	20.42		High	High	High	High	n/a	n/a	n/a	n/a	High	High	High	High	High	High	High	High	n/a	n/a	n/a	n/a	High	High	High	High	High	High
	FALSE	High	[K].FECQLAPVGDPNMK.[V]	1xTMTpro [N-Term]; 1xCarbamidomethyl [C3]; 1xTMTpro [K14]	FALSE	1	1	1	A0A7R8UGW0	A0A7R8UGW0 [3976-3989]		0	2214.15										No Quan Values	High	High	High	High	n/a	n/a	n/a	n/a	n/a	n/a	n/a	n/a	High	High	High	High	n/a	n/a	n/a	n/a	n/a	n/a	n/a	n/a	High	High
	FALSE	High	[K].VTVPESQESLPTITALK.[D]	1xTMTpro [N-Term]; 1xTMTpro [K17]	FALSE	1	1	2	A0A7R8UGW0	A0A7R8UGW0 [4698-4714]		0	2421.41	1.118	0.995	0.89	98.7	88.3	99.1	14.81	10.83	8.16		High	High	High	High	High	High	High	High	n/a	n/a	n/a	n/a	High	High	High	High	High	High	High	High	n/a	n/a	n/a	n/a	High	High
	FALSE	High	[R].YIEKVEELEAYQK.[S]	1xTMTpro [N-Term]; 2xTMTpro [K4; K13]	FALSE	1	1	1	A0A7R8UGW0	A0A7R8UGW0 [863-875]		1	2554.46	2.262	0.947	0.419	81.4	36	86	42.28	34.13	54.52		n/a	n/a	n/a	n/a	High	High	High	High	n/a	n/a	n/a	n/a	n/a	n/a	n/a	n/a	High	High	High	High	n/a	n/a	n/a	n/a	n/a	n/a
	FALSE	High	[K].LLEQPTLQEEKPVDWR.[K]	1xTMTpro [N-Term]; 1xTMTpro [K11]	FALSE	1	1	3	A0A7R8UGW0	A0A7R8UGW0 [5429-5444]		0	2589.45	1.024	0.974	0.951	86.9	84.9	89.3	34.84	26.62	30.41		High	High	High	High	High	High	High	High	High	High	High	High	High	High	High	High	High	High	High	High	High	High	High	High	High	High
	FALSE	High	[K].GGVIPPNFIQTIQTSTVTTGQLAR.[F]	1xTMTpro [N-Term]; 1xDeamidated [N/Q]	FALSE	1	1	4	A0A7R8UGW0	A0A7R8UGW0 [4495-4518]		0	2804.55	1.022	1.099	1.076	109.3	107	99.4	24.12	4.89	8.06		High	High	High	High	High	High	High	High	n/a	n/a	n/a	n/a	High	High	High	High	High	High	High	High	n/a	n/a	n/a	n/a	High	High
	FALSE	High	[R].DQETGEIQK.[V]	1xTMTpro [N-Term]; 1xTMTpro [K9]	FALSE	1	1	2	A0A7R8UGW0	A0A7R8UGW0 [5206-5214]		0	1655.91	0.82	1.335	1.627	132.7	161.8	99.4	14.04	24.24	25.28		n/a	n/a	n/a	n/a	High	High	High	High	High	High	High	High	n/a	n/a	n/a	n/a	High	High	High	High	High	High	High	High	n/a	n/a
	FALSE	High	[K].SGEAVSSVAMK.[V]	1xTMTpro [N-Term]; 1xTMTpro [K11]	FALSE	1	1	1	A0A7R8UGW0	A0A7R8UGW0 [2572-2582]		0	1673.94	0.819	1.121	1.37	103.4	126.3	92.2	57.72	41.87	39.67		n/a	n/a	n/a	n/a	n/a	n/a	n/a	n/a	High	High	High	High	n/a	n/a	n/a	n/a	n/a	n/a	n/a	n/a	High	High	High	High	n/a	n/a
	FALSE	High	[K].LGTVQTQATLK.[V]	1xTMTpro [N-Term]; 1xTMTpro [K11]	FALSE	1	1	1	A0A7R8UGW0	A0A7R8UGW0 [4687-4697]		0	1768.08	0.913	0.847	0.928	74.1	81.1	87.4	16.57	31.22	36.74		n/a	n/a	n/a	n/a	n/a	n/a	n/a	n/a	High	High	High	High	n/a	n/a	n/a	n/a	n/a	n/a	n/a	n/a	High	High	High	High	n/a	n/a
	FALSE	High	[R].FVTQIQDQTNLVEMQTTK.[F]	1xTMTpro [N-Term]; 1xDeamidated [N/Q]; 1xTMTpro [K18]	FALSE	1	1	3	A0A7R8UGW0	A0A7R8UGW0 [3958-3975]		0	2733.46										No Quan Values	n/a	n/a	n/a	n/a	High	High	High	High	High	High	High	High	n/a	n/a	n/a	n/a	High	High	High	High	High	High	High	High	n/a	n/a
	FALSE	High	[R].SSVGEAMASTDLR.[V]	1xTMTpro [N-Term]	FALSE	1	1	1	A0A7R8UGW0	A0A7R8UGW0 [4169-4181]		0	1627.83	0.849	1.045	1.23	91.7	108	87.8	18.87	21.03	31.65		n/a	n/a	n/a	n/a	n/a	n/a	n/a	n/a	High	High	High	High	n/a	n/a	n/a	n/a	n/a	n/a	n/a	n/a	High	High	High	High	n/a	n/a
	FALSE	High	[R].AVNLVGSDETSCDLVCR.[S]	1xTMTpro [N-Term]; 2xCarbamidomethyl [C12; C16]	FALSE	1	1	1	A0A7R8UGW0	A0A7R8UGW0 [1504-1520]		0	2199.07	0.875	0.933	1.066	85.4	97.6	91.5	25.41	27.84	20.95		n/a	n/a	n/a	n/a	n/a	n/a	n/a	n/a	High	High	High	High	n/a	n/a	n/a	n/a	n/a	n/a	n/a	n/a	High	High	High	High	n/a	n/a
	FALSE	High	[R].AVNLVGSDETSCDLVCR.[S]	1xTMTpro [N-Term]; 1xDeamidated [N3]; 2xCarbamidomethyl [C12; C16]	FALSE	1	1	1	A0A7R8UGW0	A0A7R8UGW0 [1504-1520]		0	2200.05	0.834	0.971	1.164	94.8	113.6	97.6	12.37	17.72	11.05		n/a	n/a	n/a	n/a	n/a	n/a	n/a	n/a	High	High	High	High	n/a	n/a	n/a	n/a	n/a	n/a	n/a	n/a	High	High	High	High	n/a	n/a
	FALSE	High	[K].SLYTNGYSYTSVEEEFR.[V]	1xTMTpro [N-Term]; 1xDeamidated [N5]	FALSE	1	1	1	A0A7R8UGW0	A0A7R8UGW0 [197-213]		0	2350.1	1.617	1.451	0.898	140.3	86.8	96.7	40.6	18.48	24.21		n/a	n/a	n/a	n/a	n/a	n/a	n/a	n/a	High	High	High	High	n/a	n/a	n/a	n/a	n/a	n/a	n/a	n/a	High	High	High	High	n/a	n/a
	FALSE	High	[R].LQPVGDPTMR.[I]	1xTMTpro [N-Term]	FALSE	1	1	5	A0A7R8UGW0	A0A7R8UGW0 [1317-1326]		0	1417.78	0.675	1.253	1.855	120.6	178.6	96.2	25.14	41.04	7.99		High	High	High	High	High	High	High	High	High	High	High	High	High	High	High	High	High	High	High	High	High	High	High	High	High	High
	FALSE	High	[R].LTPVTDPDLK.[V]	1xTMTpro [N-Term]; 1xTMTpro [K10]	FALSE	1	1	4	A0A7R8UGW0	A0A7R8UGW0 [3290-3299]		0	1707.02	1.107	1.07	0.966	100.5	90.8	94	33.13	37.55	41.15		High	High	High	High	High	High	High	High	High	High	High	High	High	High	High	High	High	High	High	High	High	High	High	High	High	High
	FALSE	High	[R].VEPINDPNLK.[I]	1xTMTpro [N-Term]; 1xTMTpro [K10]	FALSE	1	1	3	A0A7R8UGW0	A0A7R8UGW0 [2116-2125]		0	1747.02	0.77	1.035	1.345	108.1	140.5	104.4	31.04	39.74	19.38		High	High	High	High	High	High	High	High	High	High	High	High	High	High	High	High	High	High	High	High	High	High	High	High	High	High
	FALSE	High	[R].QVQPETAKPEEAPQIPWAR.[G]	1xTMTpro [N-Term]; 1xTMTpro [K8]	FALSE	1	1	1	A0A7R8UGW0	A0A7R8UGW0 [5701-5719]		0	2783.53	1.215	0.973	0.801	96.1	79.1	98.8	29.49	28.46	6.43		High	High	High	High	n/a	n/a	n/a	n/a	n/a	n/a	n/a	n/a	High	High	High	High	n/a	n/a	n/a	n/a	n/a	n/a	n/a	n/a	High	High
	FALSE	High	[R].EEVTTQPETEETEVEEFK.[K]	1xTMTpro [N-Term]; 1xTMTpro [K18]	FALSE	1	1	1	A0A7R8UGW0	A0A7R8UGW0 [6231-6248]		0	2762.38	0.763	1.299	1.704	133.6	175.2	102.8	42.38	44.49	43.25		n/a	n/a	n/a	n/a	High	High	High	High	n/a	n/a	n/a	n/a	n/a	n/a	n/a	n/a	High	High	High	High	n/a	n/a	n/a	n/a	n/a	n/a
	FALSE	High	[R].GMEGGLEK.[I]	1xTMTpro [N-Term]; 1xTMTpro [K8]	FALSE	1	1	3	A0A7R8UGW0	A0A7R8UGW0 [3373-3380]		0	1428.8	1.388	1.159	0.835	98.6	71.1	85.1	56.57	40.16	55.91		High	High	High	High	High	High	High	High	High	High	High	High	High	High	High	High	High	High	High	High	High	High	High	High	High	High
	FALSE	High	[R].LIPVGDPTLK.[V]	1xTMTpro [N-Term]; 1xTMTpro [K10]	FALSE	1	1	5	A0A7R8UGW0	A0A7R8UGW0 [2383-2392]		0	1661.05	0.806	1.269	1.575	131.6	163.3	103.7	36.82	38.26	29.56		High	High	High	High	High	High	High	High	High	High	High	High	High	High	High	High	High	High	High	High	High	High	High	High	High	High
	FALSE	High	[R].SIVNIIQR.[E]	1xTMTpro [N-Term]	FALSE	1	1	3	A0A7R8UGW0	A0A7R8UGW0 [707-714]		0	1246.78	1.128	1.247	1.106	132.7	117.6	106.4	27.31	28.51	32.03		High	High	High	High	High	High	High	High	High	High	High	High	High	High	High	High	High	High	High	High	High	High	High	High	High	High
	FALSE	High	[R].VYPPPQFIIPLR.[D]	1xTMTpro [N-Term]	FALSE	1	1	4	A0A7R8UGW0	A0A7R8UGW0 [616-627]		0	1744.05	0.932	0.97	1.041	94.1	100.9	96.9	15.52	16.17	10.56		High	High	High	High	High	High	High	High	High	High	High	High	High	High	High	High	High	High	High	High	High	High	High	High	High	High
	FALSE	High	[K].QPEQTTVQPQQPSISGVLGTTSTEEAK.[S]	1xTMTpro [N-Term]; 2xDeamidated [Q10; Q11]; 1xTMTpro [K27]	FALSE	1	1	1	A0A7R8UGW0	A0A7R8UGW0 [5001-5027]		0	3451.79	3.481	1.389	0.399	155.5	44.7	111.9	49.44	62.1	42.92		n/a	n/a	n/a	n/a	n/a	n/a	n/a	n/a	High	High	High	High	n/a	n/a	n/a	n/a	n/a	n/a	n/a	n/a	High	High	High	High	n/a	n/a
	FALSE	High	[R].DQGTYTCK.[A]	1xTMTpro [N-Term]; 1xCarbamidomethyl [C7]; 1xTMTpro [K8]	FALSE	1	1	1	A0A7R8UGW0	A0A7R8UGW0 [2964-2971]		0	1580.82	0.682	1.036	1.519	116.3	170.6	112.3	55.09	53.43	35.16		n/a	n/a	n/a	n/a	High	High	High	High	n/a	n/a	n/a	n/a	n/a	n/a	n/a	n/a	High	High	High	High	n/a	n/a	n/a	n/a	n/a	n/a
	FALSE	High	[K].GMEGTIDR.[I]	1xTMTpro [N-Term]	FALSE	1	1	1	A0A7R8UGW0	A0A7R8UGW0 [3511-3518]		0	1182.61	1.217	1.366	1.122	111.3	91.4	81.5	46.04	37.34	55.17		n/a	n/a	n/a	n/a	n/a	n/a	n/a	n/a	High	High	High	High	n/a	n/a	n/a	n/a	n/a	n/a	n/a	n/a	High	High	High	High	n/a	n/a
	FALSE	High	[R].AVGTPIPR.[I]	1xTMTpro [N-Term]	FALSE	1	1	3	A0A7R8UGW0	A0A7R8UGW0 [497-504]		0	1114.69	0.911	1.119	1.229	104.8	115.1	93.7	27.58	26.78	24.61		High	High	High	High	High	High	High	High	High	High	High	High	High	High	High	High	High	High	High	High	High	High	High	High	High	High
	FALSE	High	[R].VFENEQAR.[F]	1xTMTpro [N-Term]	FALSE	1	1	2	A0A7R8UGW0	A0A7R8UGW0 [4408-4415]		0	1296.69	0.938	1.009	1.075	99.2	105.7	98.3	17.26	27.03	15.14		High	High	High	High	High	High	High	High	n/a	n/a	n/a	n/a	High	High	High	High	High	High	High	High	n/a	n/a	n/a	n/a	High	High
	FALSE	High	[R].IDQLEQPR.[I]	1xTMTpro [N-Term]	FALSE	1	1	3	A0A7R8UGW0	A0A7R8UGW0 [2736-2743]		0	1302.73	1.232	0.829	0.673	71.7	58.2	86.5	23.53	50.08	53.79		High	High	High	High	High	High	High	High	High	High	High	High	High	High	High	High	High	High	High	High	High	High	High	High	High	High
	FALSE	High	[K].IEWFVNGK.[A]	1xTMTpro [N-Term]; 1xDeamidated [N6]; 1xTMTpro [K8]	FALSE	1	1	2	A0A7R8UGW0	A0A7R8UGW0 [2126-2133]		0	1601.92	0.937	0.845	0.902	77.1	82.3	91.2	13.24	16.11	28.56		n/a	n/a	n/a	n/a	High	High	High	High	High	High	High	High	n/a	n/a	n/a	n/a	High	High	High	High	High	High	High	High	n/a	n/a
	FALSE	High	[K].NEAGVATTR.[T]	1xTMTpro [N-Term]	FALSE	1	1	2	A0A7R8UGW0	A0A7R8UGW0 [6410-6418]		0	1222.67	1.326	1.288	0.971	120.2	90.6	93.3	39.59	6	15.08		High	High	High	High	High	High	High	High	n/a	n/a	n/a	n/a	High	High	High	High	High	High	High	High	n/a	n/a	n/a	n/a	High	High
	FALSE	High	[R].LHVETPK.[T]	1xTMTpro [N-Term]; 1xTMTpro [K7]	FALSE	1	1	3	A0A7R8UGW0	A0A7R8UGW0 [561-567]		0	1431.88	0.87	1.054	1.211	92.9	106.7	88.1	37.51	28.27	36.36		High	High	High	High	High	High	High	High	High	High	High	High	High	High	High	High	High	High	High	High	High	High	High	High	High	High
	FALSE	High	[K].ALPPVFTK.[A]	1xTMTpro [N-Term]; 1xTMTpro [K8]	FALSE	1	1	6	A0A7R8UGW0	A0A7R8UGW0 [372-379]		0	1480.94	1.335	1.198	0.898	117	87.6	97.6	11.76	34.11	11.54		High	High	High	High	High	High	High	High	High	High	High	High	High	High	High	High	High	High	High	High	High	High	High	High	High	High
	FALSE	High	[R].SSYESDFK.[L]	1xTMTpro [N-Term]; 1xTMTpro [K8]	FALSE	1	1	3	A0A7R8UGW0	A0A7R8UGW0 [235-242]		0	1570.82	0.671	1.121	1.672	110.3	164.5	98.4	26.41	35.08	18.63		High	High	High	High	High	High	High	High	High	High	High	High	High	High	High	High	High	High	High	High	High	High	High	High	High	High
	FALSE	High	[R].LKEASLDEQPDTLVAER.[I]	1xTMTpro [N-Term]; 1xTMTpro [K2]; 1xPhospho [S5]	FALSE	1	1	3	A0A7R8UGW0	A0A7R8UGW0 [6185-6201]	A0A7R8UGW0 1xPhospho [S6189]	1	2602.36	1.156	0.877	0.759	75.9	65.7	86.5	40.67	31.01	37.38		High	High	High	High	High	High	High	High	High	High	High	High	High	High	High	High	High	High	High	High	High	High	High	High	High	High
	FALSE	High	[R].LIPVGDPK.[L]	1xTMTpro [N-Term]; 1xTMTpro [K8]	FALSE	1	1	3	A0A7R8UGW0	A0A7R8UGW0 [1717-1724]		0	1446.92	0.878	0.988	1.125	84.3	96.1	85.4	11.19	24.72	38.79		High	High	High	High	High	High	High	High	High	High	High	High	High	High	High	High	High	High	High	High	High	High	High	High	High	High
	FALSE	High	[R].LIPTDDPK.[L]	1xTMTpro [N-Term]; 1xTMTpro [K8]	FALSE	1	1	2	A0A7R8UGW0	A0A7R8UGW0 [3428-3435]		0	1506.9	0.582	1.05	1.803	103.2	177.2	98.3	34.21	48.52	43.02		n/a	n/a	n/a	n/a	High	High	High	High	High	High	High	High	n/a	n/a	n/a	n/a	High	High	High	High	High	High	High	High	n/a	n/a
	FALSE	High	[K].EQIVAPK.[F]	1xTMTpro [N-Term]; 1xTMTpro [K7]	FALSE	1	1	6	A0A7R8UGW0	A0A7R8UGW0 [469-475]		0	1392.87	1.212	1.272	1.05	121.7	100.5	95.7	16.36	10.79	17.27		High	High	High	High	High	High	High	High	High	High	High	High	High	High	High	High	High	High	High	High	High	High	High	High	High	High
	FALSE	High	[R].GQVSTPK.[K]	1xTMTpro [N-Term]; 1xTMTpro [K7]	FALSE	1	1	6	A0A7R8UGW0	A0A7R8UGW0 [3798-3804]		0	1324.81	0.877	0.999	1.138	101.2	115.3	101.3	45.55	55.57	27.42		High	High	High	High	High	High	High	High	High	High	High	High	High	High	High	High	High	High	High	High	High	High	High	High	High	High
	FALSE	High	[R].LEPVGDTTMR.[I]	1xTMTpro [N-Term]; 1xOxidation [M9]	FALSE	1	1	2	A0A7R8UGW0	A0A7R8UGW0 [916-925]		0	1438.75	0.61	1.176	1.928	117.5	192.6	99.9	43.67	41.36	16.96		High	High	High	High	High	High	High	High	n/a	n/a	n/a	n/a	High	High	High	High	High	High	High	High	n/a	n/a	n/a	n/a	High	High
	FALSE	High	[R].QETELEK.[T]	1xTMTpro [N-Term]; 1xTMTpro [K7]	FALSE	1	1	1	A0A7R8UGW0	A0A7R8UGW0 [4213-4219]		0	1484.85	0.733	1.369	1.868	134.3	183.3	98.1	10.65	29.4	6.7		High	High	High	High	n/a	n/a	n/a	n/a	n/a	n/a	n/a	n/a	High	High	High	High	n/a	n/a	n/a	n/a	n/a	n/a	n/a	n/a	High	High
	FALSE	High	[R].NIHLECR.[L]	1xTMTpro [N-Term]; 1xCarbamidomethyl [C6]	FALSE	1	1	3	A0A7R8UGW0	A0A7R8UGW0 [1177-1183]		0	1245.67	0.607	1.085	1.789	103	169.7	94.9	35.39	44.9	12.54		High	High	High	High	High	High	High	High	High	High	High	High	High	High	High	High	High	High	High	High	High	High	High	High	High	High
FALSE	High	Master Protein	A0A7R8UQY8	Calponin-homology (CH) domain-containing protein OS=Hermetia illucens OX=343691 GN=HERILL_LOCUS7323 PE=3 SV=1	0	424.464	34	66	294	64	2416	260.7	6.19	8040	66	2	0.998	1.057	1.058	0.851915	0.530718	0.83997	105.4	105.5	99.7	7.04	6.83	6.71	High	High	High	1
	Checked	Confidence	Annotated Sequence	Modifications	Contaminant	# Protein Groups	# Proteins	# PSMs	Master Protein Accessions	Positions in Master Proteins	Modifications in Master Proteins	# Missed Cleavages	Theo. MH+ [Da]	Abundance Ratio: (10 mM FAC) / (100 mM FAC)	Abundance Ratio: (10 mM FAC) / (CNTRL)	Abundance Ratio: (100 mM FAC) / (CNTRL)	Abundances (Grouped): 10 mM FAC	Abundances (Grouped): 100 mM FAC	Abundances (Grouped): CNTRL	Abundances (Grouped) CV [%]: 10 mM FAC	Abundances (Grouped) CV [%]: 100 mM FAC	Abundances (Grouped) CV [%]: CNTRL	Quan Info	Found in Sample: F1: 128C, Sample, 5, 10 mM FAC	Found in Sample: F1: 129N, Sample, 6, 10 mM FAC	Found in Sample: F1: 129C, Sample, 7, 10 mM FAC	Found in Sample: F1: 130N, Sample, 8, 10 mM FAC	Found in Sample: F2: 128C, Sample, 5, 10 mM FAC	Found in Sample: F2: 129N, Sample, 6, 10 mM FAC	Found in Sample: F2: 129C, Sample, 7, 10 mM FAC	Found in Sample: F2: 130N, Sample, 8, 10 mM FAC	Found in Sample: F3: 128C, Sample, 5, 10 mM FAC	Found in Sample: F3: 129N, Sample, 6, 10 mM FAC	Found in Sample: F3: 129C, Sample, 7, 10 mM FAC	Found in Sample: F3: 130N, Sample, 8, 10 mM FAC	Found in Sample: F1: 130C, Sample, 9, 100 mM FAC	Found in Sample: F1: 131N, Sample, 10, 100 mM FAC	Found in Sample: F1: 131C, Sample, 11, 100 mM FAC	Found in Sample: F1: 132N, Sample, 12, 100 mM FAC	Found in Sample: F2: 130C, Sample, 9, 100 mM FAC	Found in Sample: F2: 131N, Sample, 10, 100 mM FAC	Found in Sample: F2: 131C, Sample, 11, 100 mM FAC	Found in Sample: F2: 132N, Sample, 12, 100 mM FAC	Found in Sample: F3: 130C, Sample, 9, 100 mM FAC	Found in Sample: F3: 131N, Sample, 10, 100 mM FAC	Found in Sample: F3: 131C, Sample, 11, 100 mM FAC	Found in Sample: F3: 132N, Sample, 12, 100 mM FAC	Found in Sample: F1: 126, Control, 1, CNTRL	Found in Sample: F1: 127N, Control, 2, CNTRL
	FALSE	High	[R].EAGDGAVTCR.[I]	1xTMTpro [N-Term]; 1xCarbamidomethyl [C9]	FALSE	1	1	3	A0A7R8UQY8	A0A7R8UQY8 [1444-1453]		0	1339.66	0.733	1.105	1.507	102.1	139.3	92.4	27.93	39.14	25.71		High	High	High	High	High	High	High	High	High	High	High	High	High	High	High	High	High	High	High	High	High	High	High	High	High	High
	FALSE	High	[K].THVENTFSVDTR.[N]	1xTMTpro [N-Term]	FALSE	2	3	1	A0A7R8UQY8; A0A7R8Z1E6	A0A7R8UQY8 [1832-1843]; A0A7R8Z1E6 [61-72]		0	1709.88										No Quan Values	n/a	n/a	n/a	n/a	High	High	High	High	n/a	n/a	n/a	n/a	n/a	n/a	n/a	n/a	High	High	High	High	n/a	n/a	n/a	n/a	n/a	n/a
	FALSE	High	[K].THVENTFSVDTR.[N]	1xTMTpro [N-Term]; 1xDeamidated [N5]	FALSE	2	3	3	A0A7R8UQY8; A0A7R8Z1E6	A0A7R8UQY8 [1832-1843]; A0A7R8Z1E6 [61-72]		0	1710.86	0.928	1.231	1.326	126	135.7	102.4	21.4	26.3	13.7	Shared	High	High	High	High	High	High	High	High	High	High	High	High	High	High	High	High	High	High	High	High	High	High	High	High	High	High
	FALSE	High	[K].YNGEHVQGSPYR.[F]	1xTMTpro [N-Term]; 1xDeamidated [N2]	FALSE	1	3	10	A0A7R8UQY8	A0A7R8UQY8 [1615-1626]		0	1711.84	1.148	0.938	0.818	95.2	82.9	101.4	17.16	27.79	10.25		High	High	High	High	High	High	High	High	High	High	High	High	High	High	High	High	High	High	High	High	High	High	High	High	High	High
	FALSE	High	[K].VSMDCTEVEEGYK.[V]	1xTMTpro [N-Term]; 1xCarbamidomethyl [C5]; 1xTMTpro [K13]	FALSE	1	2	3	A0A7R8UQY8	A0A7R8UQY8 [2242-2254]		0	2155.05	1.39	0.939	0.676	96.4	69.4	102.7	18.64	12.49	20.97		High	High	High	High	High	High	High	High	High	High	High	High	High	High	High	High	High	High	High	High	High	High	High	High	High	High
	FALSE	High	[K].VSMDCTEVEEGYK.[V]	1xTMTpro [N-Term]; 1xOxidation [M3]; 1xCarbamidomethyl [C5]; 1xTMTpro [K13]	FALSE	1	2	3	A0A7R8UQY8	A0A7R8UQY8 [2242-2254]		0	2171.05	1.281	0.951	0.743	95	74.1	99.8	8.08	14.66	18.19		High	High	High	High	High	High	High	High	High	High	High	High	High	High	High	High	High	High	High	High	High	High	High	High	High	High
	FALSE	High	[R].VNGSESTPK.[Q]	1xTMTpro [N-Term]; 1xDeamidated [N2]; 1xTMTpro [K9]	FALSE	1	1	4	A0A7R8UQY8	A0A7R8UQY8 [134-142]		0	1527.85	0.78	1.422	1.824	146.6	188.1	103.1	10.18	19.95	24.8		High	High	High	High	High	High	High	High	High	High	High	High	High	High	High	High	High	High	High	High	High	High	High	High	High	High
	FALSE	High	[K].DGSCDVSYK.[V]	1xTMTpro [N-Term]; 1xCarbamidomethyl [C4]; 1xTMTpro [K9]	FALSE	1	2	4	A0A7R8UQY8	A0A7R8UQY8 [2062-2070]		0	1638.83	0.719	1.279	1.779	134	186.4	104.8	20.68	49.26	32.01		High	High	High	High	High	High	High	High	High	High	High	High	High	High	High	High	High	High	High	High	High	High	High	High	High	High
	FALSE	High	[K].VTVIHEETK.[A]	1xTMTpro [N-Term]; 1xTMTpro [K9]	FALSE	1	1	4	A0A7R8UQY8	A0A7R8UQY8 [781-789]		0	1663.99	1.064	1.236	1.162	137	128.8	110.9	10.19	15.01	23.26		High	High	High	High	High	High	High	High	High	High	High	High	High	High	High	High	High	High	High	High	High	High	High	High	High	High
	FALSE	High	[R].DLAEDAQWK.[K]	1xTMTpro [N-Term]; 1xTMTpro [K9]	FALSE	1	1	5	A0A7R8UQY8	A0A7R8UQY8 [6-14]		0	1683.92	1.178	1.107	0.939	118.7	100.8	107.3	13.87	41.86	18.49		High	High	High	High	High	High	High	High	High	High	High	High	High	High	High	High	High	High	High	High	High	High	High	High	High	High
	FALSE	High	[K].EEGVHELAVK.[Y]	1xTMTpro [N-Term]; 1xTMTpro [K10]	FALSE	1	3	2	A0A7R8UQY8	A0A7R8UQY8 [1605-1614]		0	1718.99	1.024	0.797	0.779	79.6	77.7	99.8	36.01	37.61	5.1		High	High	High	High	n/a	n/a	n/a	n/a	High	High	High	High	High	High	High	High	n/a	n/a	n/a	n/a	High	High	High	High	High	High
	FALSE	High	[R].EVGEHQVSVK.[R]	1xTMTpro [N-Term]; 1xTMTpro [K10]	FALSE	1	2	5	A0A7R8UQY8	A0A7R8UQY8 [1785-1794]		0	1719.99	1.506	1.266	0.841	123.2	81.8	97.3	16.6	14.6	16.62		High	High	High	High	High	High	High	High	High	High	High	High	High	High	High	High	High	High	High	High	High	High	High	High	High	High
	FALSE	High	[K].VNVYGPGIEHGEVR.[E]	1xTMTpro [N-Term]	FALSE	1	1	6	A0A7R8UQY8	A0A7R8UQY8 [1225-1238]		0	1829.98	0.972	0.992	1.02	99.5	102.3	100.3	21.02	13.02	7.01		High	High	High	High	High	High	High	High	High	High	High	High	High	High	High	High	High	High	High	High	High	High	High	High	High	High
	FALSE	High	[R].DAVPVTEVGSQCK.[L]	1xTMTpro [N-Term]; 1xCarbamidomethyl [C12]; 1xTMTpro [K13]	FALSE	2	3	3	A0A7R8UQY8; A0A7R8Z1E6	A0A7R8UQY8 [1921-1933]; A0A7R8Z1E6 [150-162]		0	1998.08	1.132	1.364	1.205	139.2	123	102.1	14.48	20.82	18.75	Shared	High	High	High	High	High	High	High	High	High	High	High	High	High	High	High	High	High	High	High	High	High	High	High	High	High	High
	FALSE	High	[K].AVESVEEITSTTK.[T]	1xTMTpro [N-Term]; 1xTMTpro [K13]	FALSE	1	1	6	A0A7R8UQY8	A0A7R8UQY8 [1506-1518]		0	2002.12	1.137	1.018	0.896	100.2	88.1	98.4	13.45	15.02	10.54		High	High	High	High	High	High	High	High	High	High	High	High	High	High	High	High	High	High	High	High	High	High	High	High	High	High
	FALSE	High	[K].IHTEGAGEGVPEVK.[I]	1xTMTpro [N-Term]; 1xTMTpro [K14]	FALSE	1	1	6	A0A7R8UQY8	A0A7R8UQY8 [483-496]		0	2031.14	0.835	1.093	1.309	113	135.4	103.4	22.13	21.93	14.94		High	High	High	High	High	High	High	High	High	High	High	High	High	High	High	High	High	High	High	High	High	High	High	High	High	High
	FALSE	High	[R].ITSDSGSEILDIDVIEK.[D]	1xTMTpro [N-Term]; 1xTMTpro [K17]	FALSE	1	1	9	A0A7R8UQY8	A0A7R8UQY8 [1454-1470]		0	2442.35	1.1	1.105	1.004	118.2	107.4	107	4.11	17.57	23.37		High	High	High	High	High	High	High	High	High	High	High	High	High	High	High	High	High	High	High	High	High	High	High	High	High	High
	FALSE	High	[K].DAVQNASEAMGLADDWLNVR.[Q]	1xTMTpro [N-Term]	FALSE	1	1	5	A0A7R8UQY8	A0A7R8UQY8 [193-212]		0	2479.22	1.297	0.861	0.663	92.1	71	107.1	18.69	38.27	21.74		High	High	High	High	High	High	High	High	n/a	n/a	n/a	n/a	High	High	High	High	High	High	High	High	n/a	n/a	n/a	n/a	High	High
	FALSE	High	[K].DAVQNASEAMGLADDWLNVR.[Q]	1xTMTpro [N-Term]; 1xDeamidated [N]	FALSE	1	1	3	A0A7R8UQY8	A0A7R8UQY8 [193-212]		0	2480.2	2.023	0.907	0.448	97.2	48	107.1	32.05	50.19	28.87		High	High	High	High	High	High	High	High	High	High	High	High	High	High	High	High	High	High	High	High	High	High	High	High	High	High
	FALSE	High	[K].DAVQNASEAMGLADDWLNVR.[Q]	1xTMTpro [N-Term]; 1xOxidation [M10]	FALSE	1	1	1	A0A7R8UQY8	A0A7R8UQY8 [193-212]		0	2495.22	0.878	1.206	1.374	111.6	127.2	92.6	13.29	26.76	18.03		High	High	High	High	n/a	n/a	n/a	n/a	n/a	n/a	n/a	n/a	High	High	High	High	n/a	n/a	n/a	n/a	n/a	n/a	n/a	n/a	High	High
	FALSE	High	[K].LADEGAQETSSVIVETVPK.[I]	1xTMTpro [N-Term]; 1xTMTpro [K19]	FALSE	1	2	9	A0A7R8UQY8	A0A7R8UQY8 [2290-2308]		0	2581.42	1.424	1.128	0.792	112.5	79	99.8	25.99	19.08	10.77		High	High	High	High	High	High	High	High	High	High	High	High	High	High	High	High	High	High	High	High	High	High	High	High	High	High
	FALSE	High	[K].LADEGAQETSSVIVETVPK.[I]	1xTMTpro [N-Term]; 1xDeamidated [Q7]; 1xTMTpro [K19]	FALSE	1	2	2	A0A7R8UQY8	A0A7R8UQY8 [2290-2308]		0	2582.41	2.276	1.345	0.591	128.5	56.4	95.5	46.88	59.15	16.42		n/a	n/a	n/a	n/a	n/a	n/a	n/a	n/a	High	High	High	High	n/a	n/a	n/a	n/a	n/a	n/a	n/a	n/a	High	High	High	High	n/a	n/a
	FALSE	High	[K].TTEQLQNNISQSITETTELK.[Y]	1xTMTpro [N-Term]; 1xTMTpro [K20]	FALSE	1	1	3	A0A7R8UQY8	A0A7R8UQY8 [1536-1555]		0	2886.56	0.691	0.536	0.776	52.7	76.2	98.2	12.38	45.51	34.45		High	High	High	High	High	High	High	High	High	High	High	High	High	High	High	High	High	High	High	High	High	High	High	High	High	High
	FALSE	High	[K].TTEQLQNNISQSITETTELK.[Y]	1xTMTpro [N-Term]; 1xDeamidated [Q11]; 1xTMTpro [K20]	FALSE	1	1	6	A0A7R8UQY8	A0A7R8UQY8 [1536-1555]		0	2887.54	1.926	1.097	0.569	115	59.7	104.9	23.69	5.02	36.81		High	High	High	High	High	High	High	High	High	High	High	High	High	High	High	High	High	High	High	High	High	High	High	High	High	High
	FALSE	High	[K].TTEQLQNNISQSITETTELK.[Y]	1xTMTpro [N-Term]; 2xDeamidated [Q11; N/Q]; 1xTMTpro [K20]	FALSE	1	1	6	A0A7R8UQY8	A0A7R8UQY8 [1536-1555]		0	2888.52	2.151	1.816	0.844	178.7	83.1	98.4	21.17	24.01	35.96		High	High	High	High	High	High	High	High	High	High	High	High	High	High	High	High	High	High	High	High	High	High	High	High	High	High
	FALSE	High	[R].DGSCDVEYLPVEPGEYDITIK.[F]	1xTMTpro [N-Term]; 1xCarbamidomethyl [C4]; 1xTMTpro [K21]	FALSE	1	1	2	A0A7R8UQY8	A0A7R8UQY8 [1181-1201]		0	3007.51	1.698	1.049	0.618	104.3	61.5	99.4	33.13	7.57	16.64		High	High	High	High	n/a	n/a	n/a	n/a	High	High	High	High	High	High	High	High	n/a	n/a	n/a	n/a	High	High	High	High	High	High
	FALSE	High	[K].IGSNVEPSK.[L]	1xTMTpro [N-Term]; 1xTMTpro [K9]	FALSE	1	1	6	A0A7R8UQY8	A0A7R8UQY8 [1057-1065]		0	1538.9	0.896	1.019	1.137	99.8	111.4	97.9	15.06	14.43	17.01		High	High	High	High	High	High	High	High	High	High	High	High	High	High	High	High	High	High	High	High	High	High	High	High	High	High
	FALSE	High	[K].AGEADINVSIK.[H]	1xTMTpro [N-Term]; 1xTMTpro [K11]	FALSE	1	1	4	A0A7R8UQY8	A0A7R8UQY8 [1350-1360]		0	1725	0.948	1.18	1.245	119.4	126	101.2	12.74	14.94	7.33		High	High	High	High	High	High	High	High	High	High	High	High	High	High	High	High	High	High	High	High	High	High	High	High	High	High
	FALSE	High	[K].VYISPEVGDAHK.[M]	1xTMTpro [N-Term]; 1xTMTpro [K12]	FALSE	1	2	3	A0A7R8UQY8	A0A7R8UQY8 [2095-2106]		0	1923.08										No Quan Values	High	High	High	High	High	High	High	High	High	High	High	High	High	High	High	High	High	High	High	High	High	High	High	High	High	High
	FALSE	High	[K].GAGTGGLSLAIEGPSEAR.[M]	1xTMTpro [N-Term]	FALSE	1	1	3	A0A7R8UQY8	A0A7R8UQY8 [1156-1173]		0	1947.05	1.518	0.853	0.562	84	55.4	98.5	35.41	34.79	15.46		High	High	High	High	High	High	High	High	High	High	High	High	High	High	High	High	High	High	High	High	High	High	High	High	High	High
	FALSE	High	[R].EAGGGSLAISVEGPSK.[A]	1xTMTpro [N-Term]; 1xTMTpro [K16]	FALSE	1	2	9	A0A7R8UQY8	A0A7R8UQY8 [2037-2052]		0	2067.16	1.514	1.267	0.837	128.5	84.9	101.5	17.22	6.06	9.85		High	High	High	High	High	High	High	High	High	High	High	High	High	High	High	High	High	High	High	High	High	High	High	High	High	High
	FALSE	High	[K].IVNIDSSDIVDCK.[L]	1xTMTpro [N-Term]; 1xCarbamidomethyl [C12]; 1xTMTpro [K13]	FALSE	1	1	3	A0A7R8UQY8	A0A7R8UQY8 [92-104]		0	2086.13	1.368	0.836	0.611	88.8	64.9	106.2	17.11	17.1	16.54		High	High	High	High	High	High	High	High	High	High	High	High	High	High	High	High	High	High	High	High	High	High	High	High	High	High
	FALSE	High	[R].GVPEVIIIDPANHK.[T]	1xTMTpro [N-Term]; 1xTMTpro [K14]	FALSE	1	1	6	A0A7R8UQY8	A0A7R8UQY8 [392-405]		0	2110.25	1.226	1.035	0.845	101.1	82.5	97.6	8.7	20.76	11.86		High	High	High	High	High	High	High	High	High	High	High	High	High	High	High	High	High	High	High	High	High	High	High	High	High	High
	FALSE	High	[R].GVPEVIIIDPANHK.[T]	1xTMTpro [N-Term]; 1xDeamidated [N12]; 1xTMTpro [K14]	FALSE	1	1	4	A0A7R8UQY8	A0A7R8UQY8 [392-405]		0	2111.24	1.181	1.134	0.96	112	94.8	98.8	10.56	9.84	8.92		High	High	High	High	High	High	High	High	High	High	High	High	High	High	High	High	High	High	High	High	High	High	High	High	High	High
	FALSE	High	[K].GVVDVTIIGPNGVAEK.[A]	1xTMTpro [N-Term]; 1xTMTpro [K16]	FALSE	1	1	3	A0A7R8UQY8	A0A7R8UQY8 [292-307]		0	2176.28	0.942	0.957	1.016	98.2	104.3	102.7	10.58	6.39	12.03		High	High	High	High	High	High	High	High	High	High	High	High	High	High	High	High	High	High	High	High	High	High	High	High	High	High
	FALSE	High	[K].GVVDVTIIGPNGVAEK.[A]	1xTMTpro [N-Term]; 1xDeamidated [N11]; 1xTMTpro [K16]	FALSE	1	1	14	A0A7R8UQY8	A0A7R8UQY8 [292-307]		0	2177.27	1.087	1.135	1.045	113.2	104.2	99.7	7.48	11.5	7.75		High	High	High	High	High	High	High	High	High	High	High	High	High	High	High	High	High	High	High	High	High	High	High	High	High	High
	FALSE	High	[K].LINHNINNLETDLSDGLR.[L]	1xTMTpro [N-Term]	FALSE	1	1	1	A0A7R8UQY8	A0A7R8UQY8 [31-48]		0	2355.26	1.045	0.897	0.858	86.8	83	96.7	16.61	31.61	12.34		High	High	High	High	n/a	n/a	n/a	n/a	n/a	n/a	n/a	n/a	High	High	High	High	n/a	n/a	n/a	n/a	n/a	n/a	n/a	n/a	High	High
	FALSE	High	[K].LINHNINNLETDLSDGLR.[L]	1xTMTpro [N-Term]; 1xDeamidated [N7]	FALSE	1	1	1	A0A7R8UQY8	A0A7R8UQY8 [31-48]		0	2356.24	0.988	1.028	1.041	107.6	108.9	104.6	26.37	39.22	12.6		High	High	High	High	n/a	n/a	n/a	n/a	n/a	n/a	n/a	n/a	High	High	High	High	n/a	n/a	n/a	n/a	n/a	n/a	n/a	n/a	High	High
	FALSE	High	[K].DGTVTVTYLPTAPGEYK.[I]	1xTMTpro [N-Term]; 1xTMTpro [K17]	FALSE	1	2	6	A0A7R8UQY8	A0A7R8UQY8 [1686-1702]		0	2420.32	0.969	0.914	0.943	91.9	94.8	100.5	21.54	11.96	4.37		High	High	High	High	High	High	High	High	High	High	High	High	High	High	High	High	High	High	High	High	High	High	High	High	High	High
	FALSE	High	[R].NQISVGSCSEVTLPGAITDADLR.[S]	1xTMTpro [N-Term]; 1xCarbamidomethyl [C8]	FALSE	1	2	4	A0A7R8UQY8	A0A7R8UQY8 [1729-1751]		0	2707.39	0.915	0.998	1.091	100.1	109.4	100.3	7.26	18.2	6.78		High	High	High	High	High	High	High	High	High	High	High	High	High	High	High	High	High	High	High	High	High	High	High	High	High	High
	FALSE	High	[K].IVAPSNTEDDCFIQAIDADMYSVR.[F]	1xTMTpro [N-Term]; 1xCarbamidomethyl [C11]	FALSE	1	2	3	A0A7R8UQY8	A0A7R8UQY8 [2140-2163]		0	3034.45	1.165	0.999	0.858	93.9	80.6	94	17.93	8.73	16.39		High	High	High	High	High	High	High	High	n/a	n/a	n/a	n/a	High	High	High	High	High	High	High	High	n/a	n/a	n/a	n/a	High	High
	FALSE	High	[K].IEQIEDGTYAVTFVPDECGPYK.[L]	1xTMTpro [N-Term]; 1xCarbamidomethyl [C18]; 1xTMTpro [K22]	FALSE	1	1	2	A0A7R8UQY8	A0A7R8UQY8 [1371-1392]		0	3139.58	0.943	0.938	0.994	91.6	97.1	97.6	11.57	4.01	9.82		High	High	High	High	n/a	n/a	n/a	n/a	High	High	High	High	High	High	High	High	n/a	n/a	n/a	n/a	High	High	High	High	High	High
	FALSE	High	[K].IEQIEDGTYAVTFVPDECGPYK.[L]	1xTMTpro [N-Term]; 1xDeamidated [Q3]; 1xCarbamidomethyl [C18]; 1xTMTpro [K22]	FALSE	1	1	1	A0A7R8UQY8	A0A7R8UQY8 [1371-1392]		0	3140.56										No Quan Values	n/a	n/a	n/a	n/a	High	High	High	High	n/a	n/a	n/a	n/a	n/a	n/a	n/a	n/a	High	High	High	High	n/a	n/a	n/a	n/a	n/a	n/a
	FALSE	High	[K].LENVSVALK.[F]	1xTMTpro [N-Term]; 1xTMTpro [K9]	FALSE	1	1	3	A0A7R8UQY8	A0A7R8UQY8 [75-83]		0	1580.99	1.321	0.898	0.68	85	64.4	94.7	27	27.33	22.79		High	High	High	High	High	High	High	High	n/a	n/a	n/a	n/a	High	High	High	High	High	High	High	High	n/a	n/a	n/a	n/a	High	High
	FALSE	High	[R].MPSGNIGVSFTPR.[E]	1xTMTpro [N-Term]	FALSE	1	2	5	A0A7R8UQY8	A0A7R8UQY8 [1772-1784]		0	1666.89	0.842	0.79	0.938	80.1	95.1	101.4	38.96	42.17	21.5		High	High	High	High	High	High	High	High	High	High	High	High	High	High	High	High	High	High	High	High	High	High	High	High	High	High
	FALSE	High	[K].IVPGSSNEVFK.[I]	1xTMTpro [N-Term]; 1xTMTpro [K11]	FALSE	1	1	3	A0A7R8UQY8	A0A7R8UQY8 [1082-1092]		0	1785.04	0.849	1.273	1.499	111.8	131.6	87.8	33.88	21.68	26.09		High	High	High	High	High	High	High	High	High	High	High	High	High	High	High	High	High	High	High	High	High	High	High	High	High	High
	FALSE	High	[R].IYVGVPLDPSK.[V]	1xTMTpro [N-Term]; 1xTMTpro [K11]	FALSE	1	1	7	A0A7R8UQY8	A0A7R8UQY8 [737-747]		0	1796.08	0.893	0.962	1.077	90.1	100.8	93.6	27.12	8.5	14.7		High	High	High	High	High	High	High	High	High	High	High	High	High	High	High	High	High	High	High	High	High	High	High	High	High	High
	FALSE	High	[K].VFVSNPVDVSK.[I]	1xTMTpro [N-Term]; 1xTMTpro [K11]	FALSE	1	1	4	A0A7R8UQY8	A0A7R8UQY8 [833-843]		0	1799.06	0.876	1.021	1.165	94.8	108.1	92.8	27.56	9.44	18.08		High	High	High	High	High	High	High	High	High	High	High	High	High	High	High	High	High	High	High	High	High	High	High	High	High	High
	FALSE	High	[K].VSVSGPGIQPSGVSINR.[S]	1xTMTpro [N-Term]	FALSE	1	1	3	A0A7R8UQY8	A0A7R8UQY8 [362-378]		0	1958.1	1.025	0.715	0.697	62.9	61.4	88	13.34	37.12	37.1		High	High	High	High	High	High	High	High	High	High	High	High	High	High	High	High	High	High	High	High	High	High	High	High	High	High
	FALSE	High	[K].WGDDHIPGSPFK.[I]	1xTMTpro [N-Term]; 1xTMTpro [K12]	FALSE	1	2	4	A0A7R8UQY8	A0A7R8UQY8 [2402-2413]		0	1964.05	1.14	0.824	0.723	80.3	70.5	97.4	21.87	23.83	9.29		High	High	High	High	High	High	High	High	High	High	High	High	High	High	High	High	High	High	High	High	High	High	High	High	High	High
	FALSE	High	[K].GAGAGGLSLAVEGPSK.[A]	1xTMTpro [N-Term]; 1xTMTpro [K16]	FALSE	1	2	3	A0A7R8UQY8	A0A7R8UQY8 [1661-1676]		0	1979.14	0.955	0.709	0.743	63.8	66.8	89.9	29.73	20.92	31.12		High	High	High	High	High	High	High	High	High	High	High	High	High	High	High	High	High	High	High	High	High	High	High	High	High	High
	FALSE	High	[K].FGGQNVPNGSFAIK.[A]	1xTMTpro [N-Term]; 1xDeamidated [N8]; 1xTMTpro [K14]	FALSE	1	1	5	A0A7R8UQY8	A0A7R8UQY8 [1492-1505]		0	2045.13	0.947	0.852	0.899	81.7	86.2	95.9	26.81	9.15	19.13		High	High	High	High	High	High	High	High	High	High	High	High	High	High	High	High	High	High	High	High	High	High	High	High	High	High
	FALSE	High	[K].LPLPSTGGNVVAEVK.[M]	1xTMTpro [N-Term]; 1xTMTpro [K15]	FALSE	1	1	7	A0A7R8UQY8	A0A7R8UQY8 [1564-1578]		0	2089.25	0.788	1.132	1.436	110.6	140.3	97.8	25.15	22.71	16.08		High	High	High	High	High	High	High	High	High	High	High	High	High	High	High	High	High	High	High	High	High	High	High	High	High	High
	FALSE	High	[K].KAGEADINVSIK.[H]	1xTMTpro [N-Term]; 2xTMTpro [K1; K12]	FALSE	1	1	1	A0A7R8UQY8	A0A7R8UQY8 [1349-1360]		1	2157.31	0.971	1.464	1.508	152.3	156.8	104	10.17	23.23	15.78		High	High	High	High	n/a	n/a	n/a	n/a	n/a	n/a	n/a	n/a	High	High	High	High	n/a	n/a	n/a	n/a	n/a	n/a	n/a	n/a	High	High
	FALSE	High	[R].IPELPINNFTTDWTSGK.[A]	1xTMTpro [N-Term]; 1xDeamidated [N]; 1xTMTpro [K17]	FALSE	1	1	4	A0A7R8UQY8	A0A7R8UQY8 [153-169]		0	2542.37	1.211	0.88	0.727	86.5	71.4	98.3	22.8	30.87	7.6		High	High	High	High	n/a	n/a	n/a	n/a	High	High	High	High	High	High	High	High	n/a	n/a	n/a	n/a	High	High	High	High	High	High
	FALSE	High	[K].VGVTISNSEGKPIENLK.[V]	1xTMTpro [N-Term]; 2xTMTpro [K11; K17]	FALSE	1	1	2	A0A7R8UQY8	A0A7R8UQY8 [1257-1273]		0	2697.6	0.727	1.218	1.675	122.6	168.5	100.6	12.48	15.84	19.17		High	High	High	High	High	High	High	High	n/a	n/a	n/a	n/a	High	High	High	High	High	High	High	High	n/a	n/a	n/a	n/a	High	High
	FALSE	High	[K].LNSVHIPGSPFR.[I]	1xTMTpro [N-Term]	FALSE	1	2	5	A0A7R8UQY8	A0A7R8UQY8 [2178-2189]		0	1627.92	0.972	0.847	0.871	85.1	87.5	100.5	13.11	9.5	7.09		High	High	High	High	High	High	High	High	High	High	High	High	High	High	High	High	High	High	High	High	High	High	High	High	High	High
	FALSE	High	[K].AVGALVDACAPGLCPDWDIWDPK.[D]	1xTMTpro [N-Term]; 2xCarbamidomethyl [C9; C14]; 1xTMTpro [K23]	FALSE	1	1	1	A0A7R8UQY8	A0A7R8UQY8 [170-192]		0	3134.59	1.1	1.051	0.955	106.2	96.5	101.1	10.9	13.59	10		n/a	n/a	n/a	n/a	High	High	High	High	n/a	n/a	n/a	n/a	n/a	n/a	n/a	n/a	High	High	High	High	n/a	n/a	n/a	n/a	n/a	n/a
	FALSE	High	[K].FLEEEHIK.[I]	1xTMTpro [N-Term]; 1xTMTpro [K8]	FALSE	1	1	1	A0A7R8UQY8	A0A7R8UQY8 [84-91]		0	1652.95	1.966	0.88	0.448	86	43.8	97.7	37.99	44.36	7.21		n/a	n/a	n/a	n/a	n/a	n/a	n/a	n/a	High	High	High	High	n/a	n/a	n/a	n/a	n/a	n/a	n/a	n/a	High	High	High	High	n/a	n/a
	FALSE	High	[K].IIGPGGANQTVMVTK.[V]	1xTMTpro [N-Term]; 1xTMTpro [K15]	FALSE	1	1	1	A0A7R8UQY8	A0A7R8UQY8 [497-511]		0	2094.22	1.12	1.134	1.012	109.3	97.6	96.4	24.57	24.22	20.73		n/a	n/a	n/a	n/a	n/a	n/a	n/a	n/a	High	High	High	High	n/a	n/a	n/a	n/a	n/a	n/a	n/a	n/a	High	High	High	High	n/a	n/a
	FALSE	High	[K].DFGAHLVK.[A]	1xTMTpro [N-Term]; 1xTMTpro [K8]	FALSE	1	2	4	A0A7R8UQY8	A0A7R8UQY8 [2007-2014]		0	1494.89	1.1	1.113	1.012	111.4	101.2	100.1	14.37	18.71	3.58		High	High	High	High	High	High	High	High	High	High	High	High	High	High	High	High	High	High	High	High	High	High	High	High	High	High
	FALSE	High	[K].NSGVVLPHFK.[S]	1xTMTpro [N-Term]; 1xTMTpro [K10]	FALSE	1	2	3	A0A7R8UQY8	A0A7R8UQY8 [2315-2324]		0	1706.02	1.421	0.93	0.655	85.3	60	91.7	24.59	23.16	19.18		High	High	High	High	High	High	High	High	High	High	High	High	High	High	High	High	High	High	High	High	High	High	High	High	High	High
	FALSE	High	[K].NSGVVLPHFK.[S]	1xDeamidated [N1]; 1xTMTpro [N-Term]; 1xTMTpro [K10]	FALSE	1	2	2	A0A7R8UQY8	A0A7R8UQY8 [2315-2324]		0	1707.01										No Quan Values	n/a	n/a	n/a	n/a	High	High	High	High	High	High	High	High	n/a	n/a	n/a	n/a	High	High	High	High	High	High	High	High	n/a	n/a
	FALSE	High	[R].GLQATGVR.[V]	1xTMTpro [N-Term]	FALSE	1	1	4	A0A7R8UQY8	A0A7R8UQY8 [467-474]		0	1105.66	0.932	1.169	1.254	115.1	123.5	98.5	26.21	21.93	11.47		High	High	High	High	High	High	High	High	High	High	High	High	High	High	High	High	High	High	High	High	High	High	High	High	High	High
	FALSE	High	[R].LLNWIHTR.[I]	1xTMTpro [N-Term]	FALSE	1	1	2	A0A7R8UQY8	A0A7R8UQY8 [145-152]		0	1356.81	0.94	0.699	0.743	64.1	68.2	91.8	14.7	13.51	26.95		High	High	High	High	n/a	n/a	n/a	n/a	High	High	High	High	High	High	High	High	n/a	n/a	n/a	n/a	High	High	High	High	High	High
	FALSE	High	[R].FTPLLPGDYYCSIK.[Y]	1xTMTpro [N-Term]; 1xCarbamidomethyl [C11]; 1xTMTpro [K14]	FALSE	1	2	2	A0A7R8UQY8	A0A7R8UQY8 [2257-2270]		0	2282.24	0.893	1.008	1.128	96.4	107.9	95.6	7.87	20.54	11.26		High	High	High	High	n/a	n/a	n/a	n/a	High	High	High	High	High	High	High	High	n/a	n/a	n/a	n/a	High	High	High	High	High	High
	FALSE	High	[K].AFGPGLQK.[N]	1xTMTpro [N-Term]; 1xTMTpro [K8]	FALSE	1	1	3	A0A7R8UQY8	A0A7R8UQY8 [653-660]		0	1425.87	0.887	1.044	1.177	104.1	117.3	99.6	49.95	17.41	13.17		High	High	High	High	High	High	High	High	High	High	High	High	High	High	High	High	High	High	High	High	High	High	High	High	High	High
	FALSE	High	[R].HIPDSPYK.[V]	1xTMTpro [N-Term]; 1xTMTpro [K8]	FALSE	1	2	7	A0A7R8UQY8	A0A7R8UQY8 [2087-2094]		0	1564.9	1.085	1.006	0.927	99.2	91.4	98.6	16	10.31	9.42		High	High	High	High	High	High	High	High	High	High	High	High	High	High	High	High	High	High	High	High	High	High	High	High	High	High
	FALSE	High	[K].VDKPLIEDNR.[D]	1xTMTpro [N-Term]; 1xTMTpro [K3]	FALSE	1	2	1	A0A7R8UQY8	A0A7R8UQY8 [1584-1593]		0	1807.06	0.956	1.526	1.596	146.3	153	95.9	13.75	19.49	23.31		High	High	High	High	n/a	n/a	n/a	n/a	n/a	n/a	n/a	n/a	High	High	High	High	n/a	n/a	n/a	n/a	n/a	n/a	n/a	n/a	High	High
	FALSE	High	[K].VTGEGSNR.[Q]	1xTMTpro [N-Term]	FALSE	1	2	2	A0A7R8UQY8	A0A7R8UQY8 [1904-1911]		0	1123.6	0.967	1.157	1.197	111	114.7	95.9	17.53	21.86	20.63		High	High	High	High	High	High	High	High	n/a	n/a	n/a	n/a	High	High	High	High	High	High	High	High	n/a	n/a	n/a	n/a	High	High
	FALSE	High	[K].VAPISDAR.[K]	1xTMTpro [N-Term]	FALSE	1	1	3	A0A7R8UQY8	A0A7R8UQY8 [452-459]		0	1132.66	1.059	0.815	0.77	75.3	71.1	92.4	37.68	8.18	18.49		High	High	High	High	High	High	High	High	High	High	High	High	High	High	High	High	High	High	High	High	High	High	High	High	High	High
	FALSE	High	[R].WANEHLK.[L]	1xTMTpro [N-Term]; 1xTMTpro [K7]	FALSE	1	1	1	A0A7R8UQY8	A0A7R8UQY8 [24-30]		0	1505.87	1.034	0.52	0.503	45.3	43.8	87.2	44.55	42.66	26.5		n/a	n/a	n/a	n/a	High	High	High	High	n/a	n/a	n/a	n/a	n/a	n/a	n/a	n/a	High	High	High	High	n/a	n/a	n/a	n/a	n/a	n/a
	FALSE	High	[R].AYGPGLEK.[G]	1xTMTpro [N-Term]; 1xTMTpro [K8]	FALSE	1	1	1	A0A7R8UQY8	A0A7R8UQY8 [1134-1141]		0	1442.85	0.876	1.182	1.35	114.8	131.1	97.1	31.19	26.1	22.01		n/a	n/a	n/a	n/a	High	High	High	High	n/a	n/a	n/a	n/a	n/a	n/a	n/a	n/a	High	High	High	High	n/a	n/a	n/a	n/a	n/a	n/a
	FALSE	High	[R].EVGEHQVSVK.[R]	1xTMTpro [N-Term]; 1xDeamidated [Q6]; 1xTMTpro [K10]	FALSE	1	2	2	A0A7R8UQY8	A0A7R8UQY8 [1785-1794]		0	1720.97	1.113	1.208	1.085	116.3	104.5	96.3	11.81	6.74	20.82		n/a	n/a	n/a	n/a	High	High	High	High	n/a	n/a	n/a	n/a	n/a	n/a	n/a	n/a	High	High	High	High	n/a	n/a	n/a	n/a	n/a	n/a
	FALSE	High	[R].TDFHPELVK.[A]	1xTMTpro [N-Term]; 1xTMTpro [K9]	FALSE	1	1	2	A0A7R8UQY8	A0A7R8UQY8 [644-652]		0	1693.98	0.938	1.07	1.141	105.9	112.9	99	28.87	13.12	14.09		High	High	High	High	High	High	High	High	n/a	n/a	n/a	n/a	High	High	High	High	High	High	High	High	n/a	n/a	n/a	n/a	High	High
	FALSE	High	[R].VNGSESTPK.[Q]	1xTMTpro [N-Term]; 1xTMTpro [K9]	FALSE	1	1	1	A0A7R8UQY8	A0A7R8UQY8 [134-142]		0	1526.87	0.581	1.069	1.838	110.7	190.5	103.6	13.14	23.8	21.53		High	High	High	High	n/a	n/a	n/a	n/a	n/a	n/a	n/a	n/a	High	High	High	High	n/a	n/a	n/a	n/a	n/a	n/a	n/a	n/a	High	High
	FALSE	High	[R].VGDEADFK.[I]	1xTMTpro [N-Term]; 1xTMTpro [K8]	FALSE	1	1	3	A0A7R8UQY8	A0A7R8UQY8 [475-482]		0	1488.82	0.719	1.1	1.53	101.5	141.2	92.3	27	26.55	18.46		High	High	High	High	High	High	High	High	High	High	High	High	High	High	High	High	High	High	High	High	High	High	High	High	High	High
	FALSE	High	[R].GNIVPSK.[I]	1xTMTpro [N-Term]; 1xTMTpro [K7]	FALSE	1	1	2	A0A7R8UQY8	A0A7R8UQY8 [1075-1081]		0	1322.83	0.807	1.235	1.532	110.9	137.4	89.7	34.24	25.1	25.65		High	High	High	High	High	High	High	High	n/a	n/a	n/a	n/a	High	High	High	High	High	High	High	High	n/a	n/a	n/a	n/a	High	High
	FALSE	High	[K].VVGDTQK.[K]	1xTMTpro [N-Term]; 1xTMTpro [K7]	FALSE	1	1	2	A0A7R8UQY8	A0A7R8UQY8 [1326-1332]		0	1354.82	0.685	0.872	1.274	87.2	127.3	99.9	24.16	32.72	4.89		n/a	n/a	n/a	n/a	High	High	High	High	High	High	High	High	n/a	n/a	n/a	n/a	High	High	High	High	High	High	High	High	n/a	n/a
	FALSE	High	[K].VSGSGLK.[E]	1xTMTpro [N-Term]; 1xTMTpro [K7]	FALSE	1	2	1	A0A7R8UQY8	A0A7R8UQY8 [1822-1828]		0	1255.79	0.867	1.085	1.252	106.7	123.1	98.3	11.71	18.63	19.34		n/a	n/a	n/a	n/a	High	High	High	High	n/a	n/a	n/a	n/a	n/a	n/a	n/a	n/a	High	High	High	High	n/a	n/a	n/a	n/a	n/a	n/a
FALSE	High	Master Protein	A0A7R8YSF5	Spectrin alpha chain OS=Hermetia illucens OX=343691 GN=HERILL_LOCUS5532 PE=3 SV=1	0	418.734	27	59	263	59	2439	281.2	5.26	6785	59	0	1.123	1.014	0.902	0.160289	0.999976	0.161862	101.5	90.4	100.1	7.48	8.03	1.87	High	High	High	1
	Checked	Confidence	Annotated Sequence	Modifications	Contaminant	# Protein Groups	# Proteins	# PSMs	Master Protein Accessions	Positions in Master Proteins	Modifications in Master Proteins	# Missed Cleavages	Theo. MH+ [Da]	Abundance Ratio: (10 mM FAC) / (100 mM FAC)	Abundance Ratio: (10 mM FAC) / (CNTRL)	Abundance Ratio: (100 mM FAC) / (CNTRL)	Abundances (Grouped): 10 mM FAC	Abundances (Grouped): 100 mM FAC	Abundances (Grouped): CNTRL	Abundances (Grouped) CV [%]: 10 mM FAC	Abundances (Grouped) CV [%]: 100 mM FAC	Abundances (Grouped) CV [%]: CNTRL	Quan Info	Found in Sample: F1: 128C, Sample, 5, 10 mM FAC	Found in Sample: F1: 129N, Sample, 6, 10 mM FAC	Found in Sample: F1: 129C, Sample, 7, 10 mM FAC	Found in Sample: F1: 130N, Sample, 8, 10 mM FAC	Found in Sample: F2: 128C, Sample, 5, 10 mM FAC	Found in Sample: F2: 129N, Sample, 6, 10 mM FAC	Found in Sample: F2: 129C, Sample, 7, 10 mM FAC	Found in Sample: F2: 130N, Sample, 8, 10 mM FAC	Found in Sample: F3: 128C, Sample, 5, 10 mM FAC	Found in Sample: F3: 129N, Sample, 6, 10 mM FAC	Found in Sample: F3: 129C, Sample, 7, 10 mM FAC	Found in Sample: F3: 130N, Sample, 8, 10 mM FAC	Found in Sample: F1: 130C, Sample, 9, 100 mM FAC	Found in Sample: F1: 131N, Sample, 10, 100 mM FAC	Found in Sample: F1: 131C, Sample, 11, 100 mM FAC	Found in Sample: F1: 132N, Sample, 12, 100 mM FAC	Found in Sample: F2: 130C, Sample, 9, 100 mM FAC	Found in Sample: F2: 131N, Sample, 10, 100 mM FAC	Found in Sample: F2: 131C, Sample, 11, 100 mM FAC	Found in Sample: F2: 132N, Sample, 12, 100 mM FAC	Found in Sample: F3: 130C, Sample, 9, 100 mM FAC	Found in Sample: F3: 131N, Sample, 10, 100 mM FAC	Found in Sample: F3: 131C, Sample, 11, 100 mM FAC	Found in Sample: F3: 132N, Sample, 12, 100 mM FAC	Found in Sample: F1: 126, Control, 1, CNTRL	Found in Sample: F1: 127N, Control, 2, CNTRL
	FALSE	High	[K].LIQDGHPER.[D]	1xTMTpro [N-Term]	FALSE	1	1	6	A0A7R8YSF5	A0A7R8YSF5 [218-226]		0	1368.76	0.84	0.952	1.133	95.2	113.3	100	52.16	19.87	22.58		High	High	High	High	High	High	High	High	High	High	High	High	High	High	High	High	High	High	High	High	High	High	High	High	High	High
	FALSE	High	[K].VSTLGDEAQR.[L]	1xTMTpro [N-Term]	FALSE	1	1	3	A0A7R8YSF5	A0A7R8YSF5 [314-323]		0	1379.74	1.34	1.167	0.871	117.1	87.4	100.3	7.6	15.25	10.28		High	High	High	High	High	High	High	High	High	High	High	High	High	High	High	High	High	High	High	High	High	High	High	High	High	High
	FALSE	High	[K].DVAGAEALLER.[H]	1xTMTpro [N-Term]	FALSE	1	1	5	A0A7R8YSF5	A0A7R8YSF5 [395-405]		0	1447.81	1.269	0.985	0.776	94.6	74.6	96	9.79	17.09	18.2		High	High	High	High	High	High	High	High	High	High	High	High	High	High	High	High	High	High	High	High	High	High	High	High	High	High
	FALSE	High	[K].EELNEAWQR.[L]	1xTMTpro [N-Term]	FALSE	1	1	3	A0A7R8YSF5	A0A7R8YSF5 [234-242]		0	1478.76	0.801	1.196	1.492	122	152.2	102	18.19	24.91	12.83		High	High	High	High	High	High	High	High	High	High	High	High	High	High	High	High	High	High	High	High	High	High	High	High	High	High
	FALSE	High	[K].AINGHEEK.[I]	1xTMTpro [N-Term]; 1xDeamidated [N3]; 1xTMTpro [K8]	FALSE	1	1	9	A0A7R8YSF5	A0A7R8YSF5 [1455-1462]		0	1506.84	1.16	1.111	0.958	112.5	97	101.3	8.57	29.17	16.13		High	High	High	High	High	High	High	High	High	High	High	High	High	High	High	High	High	High	High	High	High	High	High	High	High	High
	FALSE	High	[R].DLDDEAAWIR.[E]	1xTMTpro [N-Term]	FALSE	1	1	6	A0A7R8YSF5	A0A7R8YSF5 [795-804]		0	1507.77	0.971	1.316	1.356	136.3	140.3	103.5	10.43	33.42	15.1		High	High	High	High	High	High	High	High	High	High	High	High	High	High	High	High	High	High	High	High	High	High	High	High	High	High
[truncated: 19,621 more rows]
[truncated: 18 more columns]

## Sheet: Protein comparison
Accession	Description	CNTRL	10 mM FAC	100 mM FAC	C 10 100	Exp. q-value: Combined	Sum PEP Score	Coverage [%]	# Peptides	# PSMs	# Unique Peptides	# AAs	MW [kDa]	calc. pI	Score Mascot: Mascot	# Peptides (by Search Engine): Mascot	# Razor Peptides	Abundance Ratio: (10 mM FAC) / (CNTRL)	Abundance Ratio: (100 mM FAC) / (CNTRL)	Abundance Ratio: (10 mM FAC) / (100 mM FAC)	Abundance Ratio P-Value: (10 mM FAC) / (CNTRL)	Abundance Ratio P-Value: (100 mM FAC) / (CNTRL)	Abundance Ratio P-Value: (10 mM FAC) / (100 mM FAC)	Abundances (Grouped) CV [%]: CNTRL	Abundances (Grouped) CV [%]: 10 mM FAC	Abundances (Grouped) CV [%]: 100 mM FAC	Modifications
[truncated: 170 more rows]
