# Supplementary material for: Forged in Iron: Molecular Insights into Iron Tolerance in Hermetia illucens
Source: Research Square preprint supplement (doi:10.21203/rs.3.rs-7904328/v1), 2025-11-25
Supplement: Supplementary file 2 [file 5e227c0826e96312427362bf.docx]

*T. First1*, H. Walt2, V. Ciaravolo3, S. Arena3, A. Scaloni3, F. Missirli4, F. Meyer2, F.G Hoffmann2, J.J.A. Van Loon5, D.G.A.B. Oonincx6, V. Fogliano1 and M. Mishyna1*

1Wageningen University and Research, Food Quality and Design group, Bornse Weilanden 9, 6708 WG Wageningen, the Netherlands; 2Department of Biochemistry, Nutrition, and Health Promotion, 39762 MS Mississippi State University, Mississippi State, MS, USA; 3Proteomics and Mass Spectrometry Laboratory, ISPAAM, National Research Council, Portici, 80055, Italy; 4Department of Physiology, Biophysics and Neuroscience, Center for Research and Advanced Studies (Cinvestav), 07360 Mexico City, Mexico; 5Wageningen University and Research, Animal Nutrition Group, De Elst 1, 6708 WD Wageningen, the Netherlands; 6Wageningen University and Research, Laboratory of Entomology, Droevendaalsesteeg 1, 6708 PB Wageningen, the Netherlands; [*tomer.first@wur.nl](mailto:*tomer.first@wur.nl);

Supplementary Figures

**Figure S1.** Phylogeny of RSL1D1 homologs. 100% bootstrap support suggests a shared evolutionary origin of vertebrate RSLD1 and putative arthropod homologs identified using BLASTp. Hydra and sea anemone sequences were used as outgroups. The scale bar represents the number of amino acid substitutions per site.
