# Supplementary material for: Forged in Iron: Molecular Insights into Iron Tolerance in Hermetia illucens
Source: Research Square preprint supplement (doi:10.21203/rs.3.rs-7904328/v1), 2025-11-25
Supplement: Supplementary file 3 [file e0373ea81a2872b4b6bbdb2a.xlsx]

## Sheet: All genes
Gene	D0_Control_rep1	D0_Control_rep2	D0_Control_rep3	D0_Control_rep4	D2_Control_rep1	D2_Control_rep2	D2_Control_rep3	D2_Control_rep4	D2_mM10_rep1	D2_mM10_rep2	D2_mM10_rep3	D2_mM10_rep4	D2_mM100_rep1	D2_mM100_rep2	D2_mM100_rep3	D2_mM100_rep4	D7_Control_rep1	D7_Control_rep2	D7_Control_rep3	D7_Control_rep4	D7_mM10_rep1	D7_mM10_rep2	D7_mM10_rep3	D7_mM10_rep4	D7_mM100_rep1	D7_mM100_rep2	D7_mM100_rep3	D7_mM100_rep4	#query	seed_ortholog	evalue	score	eggNOG_OGs	max_annot_lvl	COG_category	Description	Preferred_name	GOs	EC	KEGG_ko	KEGG_Pathway	KEGG_Module	KEGG_Reaction	KEGG_rclass	BRITE	KEGG_TC	CAZy	BiGG_Reaction	PFAMs
LOC119646121	8934.14	2195.52	2072.03	4688.51	3535	3774.34	1831.25	1290.02	3079.21	3529.27	4391.31	4291.58	2080.63	5250.96	2362.46	3410.01	2215.11	2274.75	1767.16	1717.66	1567.72	2020.37	3029.25	1987.56	1760.02	2034.53	1634.11	1768.93	XP_037906169.1	7213.XP_004533331.1	0	904	KOG2489@1|root,KOG2489@2759|Eukaryota,38BC2@33154|Opisthokonta,3B9SD@33208|Metazoa,3CZJN@33213|Bilateria,41XRZ@6656|Arthropoda,3SIIG@50557|Insecta,44XKB@7147|Diptera	33208|Metazoa	S	Cleft lip and palate transmembrane protein 1 (CLPTM1)	CLPTM1	GO:0002682,GO:0002694,GO:0005575,GO:0005623,GO:0005886,GO:0005887,GO:0007275,GO:0008150,GO:0009897,GO:0009986,GO:0016020,GO:0016021,GO:0031224,GO:0031226,GO:0032501,GO:0032502,GO:0033081,GO:0044425,GO:0044459,GO:0044464,GO:0045580,GO:0045595,GO:0045619,GO:0048856,GO:0050789,GO:0050793,GO:0050794,GO:0050863,GO:0050865,GO:0051239,GO:0051249,GO:0065007,GO:0071944,GO:0098552,GO:1902105,GO:1903706,GO:…	-	-	-	-	-	-	-	-	-	-	CLPTM1
LOC119646123	76.2312	71.7218	65.4435	756.457	88.0674	270.545	121.338	73.6171	82.8987	69.2317	1083.35	32.1881	127.598	1038.45	125.647	68.5032	33.131	58.1943	117.34	70.6308	37.8626	31.3748	64.0698	62.5042	49.4128	46.7	60.9001	74.298	XP_037902399.1	7165.AGAP007672-PA	0	896	28N19@1|root,2QUK7@2759|Eukaryota,38HHN@33154|Opisthokonta,3BCH4@33208|Metazoa,3CRT4@33213|Bilateria,41XHM@6656|Arthropoda,3SI23@50557|Insecta,456BT@7147|Diptera,45EUY@7148|Nematocera	33208|Metazoa	O	Lipase	PNLIP	GO:0003008,GO:0003674,GO:0003824,GO:0004620,GO:0004806,GO:0005488,GO:0005509,GO:0005575,GO:0005576,GO:0005615,GO:0005622,GO:0005623,GO:0005737,GO:0006629,GO:0006643,GO:0006644,GO:0006664,GO:0006793,GO:0006796,GO:0006810,GO:0006869,GO:0006950,GO:0006952,GO:0006968,GO:0007275,GO:0007586,GO:0008150,GO:0008152,GO:0009056,GO:0009395,GO:0009605,GO:0009719,GO:0009725,GO:0009791,GO:0009987,GO:0009991,GO:…	3.1.1.3	ko:K14073,ko:K14074,ko:K14075	ko00561,ko01100,ko04972,ko04975,ko04977,map00561,map01100,map04972,map04975,map04977	M00098	R02250,R02687	RC00020,RC00037,RC00041,RC00094	ko00000,ko00001,ko00002,ko01000	-	-	-	Lipase,PLAT
LOC119646124	1.40401	13.9724	10.0519	2.89914	24.1524	7.33915	12.3774	15.6829	6.5862	11.1756	0	7.04729	4.96937	8.56934	6.91268	15.2697	8.67204	33.307	20.2355	14.7542	10.5781	3.40221	21.7138	17.1368	4.16962	25.0333	42.9844	33.8586	XP_037902402.1	7227.FBpp0293057	0	1132	KOG4367@1|root,KOG4367@2759|Eukaryota,38CDR@33154|Opisthokonta,3BAS5@33208|Metazoa,3D01J@33213|Bilateria,41U0M@6656|Arthropoda,3SHIT@50557|Insecta,44X8H@7147|Diptera,45WMA@7214|Drosophilidae	33208|Metazoa	O	Zinc ion binding	TRIM67	GO:0000149,GO:0000902,GO:0000904,GO:0001505,GO:0001654,GO:0003674,GO:0003824,GO:0004842,GO:0005102,GO:0005488,GO:0005515,GO:0005575,GO:0005622,GO:0005623,GO:0005737,GO:0005829,GO:0005856,GO:0006464,GO:0006508,GO:0006511,GO:0006807,GO:0006810,GO:0006836,GO:0006887,GO:0006928,GO:0006935,GO:0007154,GO:0007165,GO:0007166,GO:0007267,GO:0007268,GO:0007269,GO:0007275,GO:0007399,GO:0007409,GO:0007411,GO:…	-	ko:K10649	-	-	-	-	ko00000,ko04121,ko04131	-	-	-	SPRY,fn3,zf-B_box,zf-C3HC4,zf-C3HC4_3,zf-RING_UBOX
LOC119646126	274.991	123.588	101.007	247.003	146.964	152.247	138.182	102.385	143.303	171.192	144.051	114.149	95.7785	292.303	125.695	120.579	53.7797	109.812	92.1223	79.5732	78.9937	71.4682	94.9503	85.6254	59.8487	89.6888	97.1436	125.68	XP_037902404.1	7176.CPIJ001068-PA	8.54e-45	167	2CZ5T@1|root,2S8KP@2759|Eukaryota,3A8XS@33154|Opisthokonta,3CPMD@33208|Metazoa,3DAKY@33213|Bilateria,42149@6656|Arthropoda,3SPGE@50557|Insecta,459AY@7147|Diptera	33208|Metazoa	S	Ubiquitin-2 like Rad60 SUMO-like	-	-	-	-	-	-	-	-	-	-	-	-	Rad60-SLD
LOC119646127	1137.58	395.532	227.811	733.882	315.495	384.351	330.315	226.671	266.944	408.837	405.522	458.754	175.216	835.545	257.643	237.288	273.19	356.562	273.536	228.1	254.869	278.022	395.511	241.86	346.885	198.302	272.022	314.579	XP_037902405.1	7220.FBpp0133650	1.3e-94	276	COG5126@1|root,KOG0027@2759|Eukaryota,3A3NR@33154|Opisthokonta,3BSDV@33208|Metazoa,3D8SZ@33213|Bilateria,41YQ4@6656|Arthropoda,3SM10@50557|Insecta,452QZ@7147|Diptera,45Q6R@7214|Drosophilidae	33208|Metazoa	T	Calcium ion binding	-	-	-	ko:K02183	ko04014,ko04015,ko04016,ko04020,ko04022,ko04024,ko04070,ko04114,ko04218,ko04261,ko04270,ko04371,ko04626,ko04713,ko04720,ko04722,ko04728,ko04740,ko04744,ko04745,ko04750,ko04910,ko04912,ko04915,ko04916,ko04921,ko04922,ko04924,ko04925,ko04970,ko04971,ko05010,ko05031,ko05034,ko05133,ko05152,ko05167,ko05200,ko05214,ko05418,map04014,map04015,map04016,map04020,map04022,map04024,map04070,map04114,map0421…	-	-	-	ko00000,ko00001,ko01009,ko03036,ko04131,ko04147	-	-	-	EF-hand_7,EF-hand_8
LOC119646131	27.9893	29.9455	66.7214	12.9987	0	32.9104	44.0517	46.056	37.2642	40.4864	84.3074	30.7182	56.1103	43.7625	48.6848	97.5337	161.328	54.8816	35.9252	108.741	138.353	80.1721	32.7449	54.0485	88.0699	57.2667	63.7136	184.56	XP_037902408.1	7159.AAEL017445-PA	1.01e-109	355	KOG3802@1|root,KOG3802@2759|Eukaryota,38I27@33154|Opisthokonta,3BAPQ@33208|Metazoa,3CW0C@33213|Bilateria,41VU8@6656|Arthropoda,3SICV@50557|Insecta,44XB1@7147|Diptera,45DEY@7148|Nematocera	33208|Metazoa	K	Found in Pit-Oct-Unc transcription factors	POU2F1	GO:0000902,GO:0000904,GO:0000976,GO:0000977,GO:0000978,GO:0000979,GO:0000981,GO:0000982,GO:0000983,GO:0000987,GO:0001012,GO:0001046,GO:0001047,GO:0001067,GO:0001077,GO:0001221,GO:0001223,GO:0001228,GO:0001654,GO:0001709,GO:0001889,GO:0002088,GO:0002089,GO:0002682,GO:0002683,GO:0002697,GO:0002698,GO:0002700,GO:0002701,GO:0002759,GO:0002784,GO:0002785,GO:0002786,GO:0002787,GO:0002805,GO:0002806,GO:…	-	ko:K09364	-	-	-	-	ko00000,ko03000,ko03021	-	-	-	Homeobox,Pou
LOC119646132	109.15	121.859	232.516	77.9963	6.94463	78.0108	119.821	122.462	104.347	72.882	63.4526	76.3621	80.0461	86.4596	121.709	75.2661	79.9415	98.2833	152.084	88.1844	57.9769	62.1221	74.6028	91.8895	146.24	136.715	110.749	66.8949	XP_037902409.1	7370.XP_005192053.1	5.21e-182	582	COG5535@1|root,KOG2179@2759|Eukaryota,38BBG@33154|Opisthokonta,3BEHR@33208|Metazoa,3CT44@33213|Bilateria,41XH6@6656|Arthropoda,3SGEZ@50557|Insecta,44WXY@7147|Diptera	33208|Metazoa	L	Damaged DNA binding. It is involved in the biological process described with nucleotide-excision repair	XPC	GO:0000003,GO:0000075,GO:0000077,GO:0000109,GO:0000111,GO:0000217,GO:0000278,GO:0000280,GO:0000404,GO:0000405,GO:0000710,GO:0000715,GO:0003674,GO:0003676,GO:0003677,GO:0003684,GO:0003690,GO:0003697,GO:0005488,GO:0005575,GO:0005622,GO:0005623,GO:0005634,GO:0005654,GO:0005730,GO:0005737,GO:0005739,GO:0005829,GO:0005886,GO:0006139,GO:0006259,GO:0006281,GO:0006289,GO:0006294,GO:0006298,GO:0006310,GO:…	-	ko:K10838	ko03420,map03420	-	-	-	ko00000,ko00001,ko03400	-	-	-	BHD_1,BHD_2,BHD_3,Rad4
LOC119646133	359.341	409.75	569.334	343.768	450.784	388.736	410.424	438.292	742.905	836.315	378.6	459.987	572.806	424.747	362.168	695.059	363.372	268.078	271.751	394.23	251.603	346.121	217.691	333.379	236.008	357.603	410.446	353.771	XP_037902410.1	7370.XP_005177455.1	0	907	COG1132@1|root,KOG0058@2759|Eukaryota,38F7P@33154|Opisthokonta,3BCBZ@33208|Metazoa,3CREB@33213|Bilateria,41WP1@6656|Arthropoda,3SHCX@50557|Insecta,451MZ@7147|Diptera	33208|Metazoa	Q	It is involved in the biological process described with transmembrane transport	ABCB8	GO:0000166,GO:0003674,GO:0003824,GO:0005215,GO:0005488,GO:0005524,GO:0005575,GO:0005622,GO:0005623,GO:0005634,GO:0005730,GO:0005737,GO:0005739,GO:0005740,GO:0005743,GO:0005783,GO:0005886,GO:0006810,GO:0008144,GO:0008150,GO:0009892,GO:0009987,GO:0010468,GO:0010605,GO:0010608,GO:0010629,GO:0012505,GO:0015399,GO:0015405,GO:0016020,GO:0016021,GO:0016246,GO:0016441,GO:0016458,GO:0016462,GO:0016787,GO:…	-	ko:K05655	ko02010,map02010	-	-	-	ko00000,ko00001,ko02000	3.A.1.201	-	-	ABC_membrane,ABC_tran
LOC119646134	34.3676	75.7464	18.1841	1942.16	0	797.525	596.829	30.774	13.561	8.28807	2494.83	0.898313	11.8602	3403.39	185.41	10.2183	0	0	4.90208	0	0	0	5.23057	0.922013	0	7.56353	4.6581	9.26656	XP_037902413.1	7244.FBpp0235600	4.09e-297	843	COG5640@1|root,KOG3627@2759|Eukaryota,39IVY@33154|Opisthokonta,3BFZ7@33208|Metazoa,3CYQ6@33213|Bilateria,41TD5@6656|Arthropoda,3SGIV@50557|Insecta,44X8Q@7147|Diptera,45P1B@7214|Drosophilidae	33208|Metazoa	O	serine-type endopeptidase activity. It is involved in the biological process described with proteolysis	-	GO:0003674,GO:0003824,GO:0004175,GO:0004252,GO:0006508,GO:0006807,GO:0008150,GO:0008152,GO:0008233,GO:0008236,GO:0016787,GO:0017171,GO:0019538,GO:0043170,GO:0044238,GO:0070011,GO:0071704,GO:0140096,GO:1901564	-	-	-	-	-	-	-	-	-	-	Trypsin
LOC119646135	5.69884	49.6863	65.5271	30.8803	22.9794	35.6524	77.9228	62.451	81.3335	83.6148	100.56	53.5999	107.58	99.4841	86.9589	148.717	179.57	117.433	91.8477	131.112	107.9	187.674	59.5988	168.528	207.737	5.64264	104.04	138.65	XP_037902419.1	7159.AAEL017229-PA	6.63e-134	435	KOG1721@1|root,KOG1721@2759|Eukaryota,38D4Z@33154|Opisthokonta,3BAJ6@33208|Metazoa,3CY6F@33213|Bilateria,41VR6@6656|Arthropoda,3SJ8U@50557|Insecta,44ZEM@7147|Diptera,45FJC@7148|Nematocera	33208|Metazoa	K	Zinc finger, C2H2 type	MECOM	GO:0000122,GO:0000902,GO:0000904,GO:0000976,GO:0000977,GO:0000981,GO:0001012,GO:0001067,GO:0001228,GO:0001655,GO:0001701,GO:0001776,GO:0001780,GO:0001932,GO:0001933,GO:0002262,GO:0002376,GO:0002520,GO:0002682,GO:0002683,GO:0002761,GO:0002762,GO:0003674,GO:0003676,GO:0003677,GO:0003690,GO:0003700,GO:0003712,GO:0003713,GO:0003824,GO:0005488,GO:0005515,GO:0005575,GO:0005622,GO:0005623,GO:0005634,GO:…	-	ko:K04462,ko:K22410	ko04010,ko04714,ko05200,ko05220,map04010,map04714,map05200,map05220	-	-	-	ko00000,ko00001,ko03000	-	-	-	zf-C2H2,zf-C2H2_6
LOC119646137	607.002	409.48	579.038	959.13	271.295	426.246	364.325	202.628	1013.92	608.856	536.238	1227.6	468.195	729.633	412.416	932.373	167.153	200.481	175.847	221.118	214.574	198.644	253.021	237.965	290.116	308.866	310.426	219.927	XP_037902421.1	136037.KDR07029	1.29e-126	377	28UV5@1|root,2R1K6@2759|Eukaryota,39WEK@33154|Opisthokonta,3BFIN@33208|Metazoa,3CZQB@33213|Bilateria,41W39@6656|Arthropoda,3SJE0@50557|Insecta	33208|Metazoa	S	regulation of mRNA processing	PTCD2	GO:0001655,GO:0001822,GO:0001889,GO:0003007,GO:0003205,GO:0003206,GO:0003208,GO:0003229,GO:0003231,GO:0005575,GO:0005622,GO:0005623,GO:0005737,GO:0005739,GO:0006996,GO:0007005,GO:0007275,GO:0007507,GO:0007517,GO:0008150,GO:0009653,GO:0009887,GO:0009888,GO:0009987,GO:0010468,GO:0014706,GO:0016043,GO:0019219,GO:0019222,GO:0030154,GO:0031323,GO:0032501,GO:0032502,GO:0042692,GO:0043226,GO:0043227,GO:…	-	ko:K17711	-	-	-	-	ko00000,ko03029	-	-	-	MRP-S27
LOC119646138	44.6864	111.837	68.0209	163.223	173.014	96.2322	71.3028	84.6497	63.7798	76.9769	79.5232	129.068	66.8738	120.559	58.3476	79.1059	74.1286	44.6882	70.5978	48.6076	65.8369	60.0819	82.1221	67.5937	83.118	54.5447	64.5042	62.0383	XP_037902422.1	7176.CPIJ003712-PA	2.13e-115	347	KOG1982@1|root,KOG1982@2759|Eukaryota,38R3W@33154|Opisthokonta,3BI6C@33208|Metazoa,3CZR9@33213|Bilateria,41YSY@6656|Arthropoda,3SMAI@50557|Insecta,4535G@7147|Diptera,45DB5@7148|Nematocera	33208|Metazoa	L	RAI1 like PD-(D/E)XK nuclease	DXO	GO:0000003,GO:0000287,GO:0000578,GO:0000956,GO:0003002,GO:0003006,GO:0003674,GO:0003676,GO:0003723,GO:0003729,GO:0003824,GO:0004518,GO:0004527,GO:0005488,GO:0005575,GO:0005622,GO:0005623,GO:0005634,GO:0005737,GO:0005829,GO:0005886,GO:0006139,GO:0006396,GO:0006401,GO:0006402,GO:0006725,GO:0006807,GO:0006996,GO:0007028,GO:0007049,GO:0007275,GO:0007276,GO:0007281,GO:0007292,GO:0007293,GO:0007308,GO:…	-	ko:K14845	-	-	-	-	ko00000,ko03009,ko03021	-	-	-	RAI1
LOC119646139	713.514	203.506	188.566	313.446	451.492	578.593	250.87	282.144	259.263	405.153	519.897	1063.29	289.793	431.017	397.99	400.906	376.457	338.359	318.276	287.257	367.357	426.317	567.636	447.93	429.727	379.978	418.148	390.754	XP_037902424.1	7217.FBpp0114693	2.53e-56	201	2DJWY@1|root,2S61H@2759|Eukaryota,3A5YU@33154|Opisthokonta,3BTRR@33208|Metazoa,3D98S@33213|Bilateria,420H4@6656|Arthropoda,3SNQP@50557|Insecta,452YF@7147|Diptera,45SI2@7214|Drosophilidae	33208|Metazoa	S	Mab-21	-	-	2.7.7.86	ko:K17834	ko04623,map04623	-	-	-	ko00000,ko00001,ko01000	-	-	-	Mab-21
LOC119646140	62.6083	12.4475	2.6912	17.3499	1.7184	41.3992	46.6139	2.08278	9.12578	1.01509	91.8733	14.0713	0.827055	222.967	35.3683	3.0744	2.90873	5.11569	0	0	2.63057	0	3.67786	0	1.66491	6.48987	8.36373	24.1611	XP_037902425.1	7230.FBpp0171896	2.5e-45	159	2E59B@1|root,2SC3E@2759|Eukaryota,3AC58@33154|Opisthokonta,3BVG0@33208|Metazoa,3DCVQ@33213|Bilateria,421TA@6656|Arthropoda,3SPA2@50557|Insecta,454H9@7147|Diptera,45WXI@7214|Drosophilidae	33208|Metazoa	S	DM4/DM12 family	-	-	-	-	-	-	-	-	-	-	-	-	DM4_12
LOC119646141	0	5.56568	66.0275	3163.04	199.406	1056.5	254.528	141.218	175.568	53.657	2457.51	74.6104	223.656	1092.77	132.076	145.147	14.534	24.2528	250.197	25.0029	10.5381	1.13084	108.368	39.6418	12.4643	7.39157	79.6548	7.25237	XP_037902426.1	7159.AAEL012090-PA	1.48e-126	392	2C3BG@1|root,2QW2N@2759|Eukaryota,39VF8@33154|Opisthokonta,3BDNW@33208|Metazoa,3D3Z5@33213|Bilateria,41TI7@6656|Arthropoda,3SK3Q@50557|Insecta,45501@7147|Diptera,45FQP@7148|Nematocera	33208|Metazoa	O	Insect cuticle protein	-	-	-	-	-	-	-	-	-	-	-	-	Chitin_bind_4
LOC119646142	3530.44	1365.77	1420.39	2688.11	6945.51	3739.73	2806.41	3154.13	1585.37	2926.08	3070.2	2707.76	1869.96	4074.54	2361.08	1523.75	2812.52	2106.71	1236.09	2303.56	1676.24	2319.14	3455.21	2250.39	2741.21	2231.66	2263.69	2030.37	XP_037902427.1	7245.FBpp0256694	2.83e-240	671	COG1454@1|root,KOG3857@2759|Eukaryota,38EFC@33154|Opisthokonta,3BCTE@33208|Metazoa,3CT5M@33213|Bilateria,41YGY@6656|Arthropoda,3SJKG@50557|Insecta,45093@7147|Diptera,45PR1@7214|Drosophilidae	33208|Metazoa	E	Metal ion binding. It is involved in the biological process described with oxidation-reduction process	ADHFE1	GO:0003674,GO:0003824,GO:0004022,GO:0005575,GO:0005622,GO:0005623,GO:0005737,GO:0005739,GO:0005759,GO:0005829,GO:0006082,GO:0006103,GO:0006520,GO:0006536,GO:0006538,GO:0006539,GO:0006807,GO:0008150,GO:0008152,GO:0009056,GO:0009063,GO:0009064,GO:0009065,GO:0009987,GO:0016054,GO:0016491,GO:0016614,GO:0016616,GO:0019752,GO:0031974,GO:0043226,GO:0043227,GO:0043229,GO:0043231,GO:0043233,GO:0043436,GO:…	1.1.99.24	ko:K11173	-	-	-	-	ko00000,ko01000	-	-	-	Fe-ADH
LOC119646144	57.3126	157.176	53.2231	92.4424	32.9283	138.911	101.275	31.3755	77.8536	42.5275	206.497	43.8936	49.5249	252.913	161.249	36.097	34.8838	62.554	175.963	45.6131	84.2999	49.7906	90.205	58.5694	43.2145	42.5098	102.427	99.9222	XP_037902430.1	7213.XP_004537387.1	1.85e-194	558	COG0666@1|root,KOG0504@2759|Eukaryota,38G50@33154|Opisthokonta,3BEMZ@33208|Metazoa,3CRKX@33213|Bilateria,41TR3@6656|Arthropoda,3SGF3@50557|Insecta,450EI@7147|Diptera	33208|Metazoa	S	Sterile alpha motif.	USH1G	GO:0001894,GO:0001895,GO:0001917,GO:0003008,GO:0003674,GO:0005488,GO:0005515,GO:0005575,GO:0005622,GO:0005623,GO:0005737,GO:0005768,GO:0005769,GO:0005815,GO:0005829,GO:0005856,GO:0005886,GO:0005929,GO:0007275,GO:0007399,GO:0007423,GO:0007600,GO:0007605,GO:0008092,GO:0008150,GO:0009653,GO:0009790,GO:0009887,GO:0009987,GO:0012505,GO:0015629,GO:0015630,GO:0016020,GO:0016043,GO:0022008,GO:0030030,GO:…	-	ko:K21878	-	-	-	-	ko00000,ko03036	-	-	-	Ank_2,Ank_4,SAM_1
LOC119646146	53.1887	174.831	297.915	44.7754	45.1585	42.6654	165.651	157.031	173.907	114.376	110.173	96.5461	153.482	72.5874	180.156	194.31	130.813	107.214	173.655	117.549	112.01	124.191	63.6634	134.224	149.558	122.847	120.604	149.915	XP_037902431.1	7370.XP_005174906.1	0	1865	KOG4833@1|root,KOG4833@2759|Eukaryota,38ETV@33154|Opisthokonta,3BES7@33208|Metazoa,3CZUR@33213|Bilateria,41UG2@6656|Arthropoda,3SINM@50557|Insecta,45282@7147|Diptera	33208|Metazoa	S	Nucleoporin subcomplex protein binding to Pom34	NUP188	GO:0001667,GO:0003674,GO:0005198,GO:0005575,GO:0005622,GO:0005623,GO:0005634,GO:0005635,GO:0005643,GO:0006403,GO:0006405,GO:0006406,GO:0006606,GO:0006611,GO:0006810,GO:0006886,GO:0006913,GO:0006928,GO:0006996,GO:0006997,GO:0006999,GO:0008104,GO:0008150,GO:0008152,GO:0009987,GO:0010467,GO:0010631,GO:0012505,GO:0015031,GO:0015833,GO:0015931,GO:0016032,GO:0016043,GO:0016477,GO:0017038,GO:0017056,GO:…	-	ko:K14311	ko03013,map03013	M00427	-	-	ko00000,ko00001,ko00002,ko03019	1.I.1	-	-	Nup188
LOC119646147	3195.25	733.476	659.618	1622.18	3407.42	2161.04	874.391	1047.91	1038.86	1627.43	1153.45	2239.52	848.215	1752.23	852.122	1078.29	1014.55	524.9	607.471	860.266	823.809	812.954	1746.99	869.995	879.622	767.82	762.168	781.308	XP_037902432.1	7213.XP_004522037.1	1.28e-77	243	KOG2629@1|root,KOG2629@2759|Eukaryota,38HJ0@33154|Opisthokonta,3BGMV@33208|Metazoa,3CS0N@33213|Bilateria,420MC@6656|Arthropoda,3SN75@50557|Insecta,44XKY@7147|Diptera	33208|Metazoa	MOU	It is involved in the biological process described with protein import into peroxisome matrix, docking	PEX14	GO:0000226,GO:0001650,GO:0003674,GO:0003712,GO:0003714,GO:0005102,GO:0005488,GO:0005515,GO:0005575,GO:0005622,GO:0005623,GO:0005634,GO:0005730,GO:0005737,GO:0005777,GO:0005778,GO:0006355,GO:0006464,GO:0006605,GO:0006625,GO:0006807,GO:0006810,GO:0006886,GO:0006928,GO:0006996,GO:0007010,GO:0007017,GO:0007018,GO:0007031,GO:0008017,GO:0008092,GO:0008104,GO:0008150,GO:0008152,GO:0009889,GO:0009890,GO:…	-	ko:K13343	ko04146,map04146	-	-	-	ko00000,ko00001,ko04131	3.A.20.1	-	-	Pex14_N
LOC119646149	962.137	1885.91	2245.72	2222.87	1295.08	1612.25	2257.55	2396.48	2233.24	1654.65	2546.9	1125.95	2131.11	1664.45	1984.31	2185.52	2846.69	3141.77	3135.82	3226.81	2524.81	2540.65	1940.65	2565.27	1741.13	1943.33	1930.27	2224.15	XP_037902440.1	7159.AAEL007826-PA	0	1263	COG0664@1|root,KOG0614@2759|Eukaryota,3AH8Y@33154|Opisthokonta,3BA35@33208|Metazoa,3CRYY@33213|Bilateria,41U72@6656|Arthropoda,3SK1N@50557|Insecta,450M8@7147|Diptera,45FUN@7148|Nematocera	33208|Metazoa	T	Extension to Ser/Thr-type protein kinases	PRKG1	GO:0000166,GO:0001669,GO:0001764,GO:0003008,GO:0003012,GO:0003013,GO:0003018,GO:0003298,GO:0003300,GO:0003301,GO:0003674,GO:0003824,GO:0004672,GO:0004674,GO:0004690,GO:0004692,GO:0005246,GO:0005488,GO:0005515,GO:0005575,GO:0005622,GO:0005623,GO:0005634,GO:0005654,GO:0005737,GO:0005794,GO:0005829,GO:0005886,GO:0006109,GO:0006464,GO:0006468,GO:0006793,GO:0006796,GO:0006807,GO:0006873,GO:0006874,GO:…	2.7.11.12	ko:K07376	ko04022,ko04270,ko04540,ko04611,ko04713,ko04714,ko04730,ko04740,ko04923,ko04970,map04022,map04270,map04540,map04611,map04713,map04714,map04730,map04740,map04923,map04970	M00694	-	-	ko00000,ko00001,ko00002,ko01000,ko01001	-	-	-	PKcGMP_CC,Pkinase,cNMP_binding
LOC119646151	445.869	453.385	425.768	262.884	365.608	335.08	346.079	441.311	359.456	247.073	240.808	219.472	352.461	248.638	352.36	311.816	345.931	302.562	396.2	319.33	343.772	332.758	307.111	227.975	305	352.108	289.837	353.75	XP_037902448.1	7159.AAEL003519-PA	1.17e-50	195	KOG4343@1|root,KOG4343@2759|Eukaryota,38I3I@33154|Opisthokonta,3BCGY@33208|Metazoa,3CTNZ@33213|Bilateria,41ZIT@6656|Arthropoda,3SMNS@50557|Insecta,44XW7@7147|Diptera,45HFZ@7148|Nematocera	33208|Metazoa	K	bZIP transcription factor	ATF6	GO:0000139,GO:0000976,GO:0000977,GO:0000978,GO:0000981,GO:0000982,GO:0000987,GO:0001012,GO:0001067,GO:0001077,GO:0001228,GO:0001654,GO:0003008,GO:0003674,GO:0003676,GO:0003677,GO:0003690,GO:0003700,GO:0003712,GO:0003713,GO:0005488,GO:0005515,GO:0005575,GO:0005622,GO:0005623,GO:0005634,GO:0005635,GO:0005654,GO:0005737,GO:0005783,GO:0005789,GO:0005794,GO:0005829,GO:0006139,GO:0006351,GO:0006355,GO:…	-	ko:K09049,ko:K09054	ko04022,ko04141,ko04151,ko04211,ko04261,ko04668,ko04728,ko04911,ko04915,ko04918,ko04925,ko04926,ko04927,ko04934,ko05010,ko05030,ko05031,ko05034,ko05161,ko05203,map04022,map04141,map04151,map04211,map04261,map04668,map04728,map04911,map04915,map04918,map04925,map04926,map04927,map04934,map05010,map05030,map05031,map05034,map05161,map05203	-	-	-	ko00000,ko00001,ko03000	-	-	-	bZIP_1
LOC119646152	2111.02	1574.85	1176.47	1168.98	806.554	721.453	969.189	963.578	784.438	796.582	953.023	622.266	963.284	1231.31	988.579	807.259	913.31	844.123	788.088	870.745	857.543	858.976	573.451	856.717	1116.67	832.978	856.813	1497.36	XP_037902451.1	7213.XP_004526293.1	4.64e-234	665	KOG1565@1|root,KOG1565@2759|Eukaryota,38CRR@33154|Opisthokonta,3B9IY@33208|Metazoa,3CT1E@33213|Bilateria,41U9H@6656|Arthropoda,3SJ4N@50557|Insecta,44Z41@7147|Diptera	33208|Metazoa	O	calcium ion binding. It is involved in the biological process described with proteolysis	Mmp1	GO:0001838,GO:0002009,GO:0002164,GO:0002165,GO:0002168,GO:0003007,GO:0003143,GO:0003144,GO:0005575,GO:0005623,GO:0006950,GO:0007155,GO:0007275,GO:0007399,GO:0007413,GO:0007417,GO:0007419,GO:0007424,GO:0007444,GO:0007503,GO:0007505,GO:0007507,GO:0007552,GO:0007560,GO:0007561,GO:0007591,GO:0008037,GO:0008038,GO:0008150,GO:0009611,GO:0009653,GO:0009790,GO:0009791,GO:0009886,GO:0009887,GO:0009888,GO:…	3.4.24.80	ko:K07763,ko:K07994	ko04657,ko04668,ko04912,ko04926,map04657,map04668,map04912,map04926	-	-	-	ko00000,ko00001,ko01000,ko01002	-	-	-	Hemopexin,PG_binding_1,Peptidase_M10
LOC119646153	1201.08	750.312	664.071	785.777	884.268	847.848	664.644	679.344	723.934	847.732	733.185	941.213	681.931	832.201	565.454	857.109	609.017	580.937	629.424	693.682	628.107	684.572	669.645	599.317	770.491	856.962	598.737	643.76	XP_037902452.1	7159.AAEL018281-PA	8.88e-188	526	KOG1734@1|root,KOG1734@2759|Eukaryota,38G1N@33154|Opisthokonta,3B9BB@33208|Metazoa,3CW5T@33213|Bilateria,41W07@6656|Arthropoda,3SJ9Q@50557|Insecta,450G2@7147|Diptera,45CVW@7148|Nematocera	33208|Metazoa	O	Ring finger	RNF121	GO:0000139,GO:0003674,GO:0003824,GO:0004842,GO:0005488,GO:0005575,GO:0005622,GO:0005623,GO:0005737,GO:0005783,GO:0005789,GO:0005794,GO:0006464,GO:0006508,GO:0006511,GO:0006807,GO:0006928,GO:0006950,GO:0006986,GO:0007154,GO:0007165,GO:0008150,GO:0008152,GO:0008270,GO:0009056,GO:0009057,GO:0009987,GO:0010033,GO:0010243,GO:0010498,GO:0012505,GO:0016020,GO:0016477,GO:0016528,GO:0016529,GO:0016567,GO:…	-	ko:K15698	-	-	-	-	ko00000,ko04121	-	-	-	zf-RING_2
LOC119646154	1637.54	1219.07	761.194	919.094	788.009	861.467	663.362	492.703	1007.77	593.894	622.139	1248.04	870.879	915.439	1140.65	985.043	396.366	647.903	2639.06	753.356	459.025	434.863	2075.52	983.082	580.355	724.006	1594.16	734.776	XP_037902453.1	7165.AGAP008664-PA	2.35e-165	473	COG1087@1|root,KOG1371@2759|Eukaryota,38C46@33154|Opisthokonta,3BFFH@33208|Metazoa,3CTIM@33213|Bilateria,41UUG@6656|Arthropoda,3SFN0@50557|Insecta,4564F@7147|Diptera,45FUB@7148|Nematocera	33208|Metazoa	Q	Udp-glucose 4-epimerase	-	GO:0000003,GO:0002119,GO:0002164,GO:0003006,GO:0003674,GO:0003824,GO:0003974,GO:0003978,GO:0005975,GO:0005996,GO:0006012,GO:0006950,GO:0006952,GO:0007275,GO:0007548,GO:0008150,GO:0008152,GO:0008406,GO:0009605,GO:0009607,GO:0009617,GO:0009653,GO:0009790,GO:0009791,GO:0009792,GO:0009887,GO:0009966,GO:0009968,GO:0010646,GO:0010648,GO:0016853,GO:0016854,GO:0016857,GO:0019318,GO:0022414,GO:0023051,GO:…	5.1.3.2	ko:K01784	ko00052,ko00520,ko01100,map00052,map00520,map01100	M00361,M00362,M00632	R00291,R02984	RC00289	ko00000,ko00001,ko00002,ko01000	-	-	-	Epimerase,GDP_Man_Dehyd
LOC119646156	58.5591	19.4143	14.1353	60.669	20.7077	17.0455	9.67686	10.4384	9.11272	26.346	17.6135	11.417	7.43303	43.7271	10.4094	12.2882	7.26758	5.10842	16.7421	5.90156	2.63209	11.3675	23.7768	9.01527	20.7846	24.9761	8.35024	4.02744	XP_037902455.1	7370.XP_005189376.1	9.88e-78	249	KOG2356@1|root,KOG2356@2759|Eukaryota,38GQ0@33154|Opisthokonta,3BHYU@33208|Metazoa,3CUEQ@33213|Bilateria,41ZIS@6656|Arthropoda,3SKXW@50557|Insecta,453XC@7147|Diptera	33208|Metazoa	KT	nucleic acid binding. It is involved in the biological process described with	METTL4	GO:0003674,GO:0003824,GO:0005575,GO:0005622,GO:0005623,GO:0005634,GO:0006139,GO:0006259,GO:0006304,GO:0006305,GO:0006306,GO:0006725,GO:0006807,GO:0008150,GO:0008152,GO:0008168,GO:0008757,GO:0009007,GO:0009008,GO:0009987,GO:0016740,GO:0016741,GO:0032259,GO:0032775,GO:0034641,GO:0043170,GO:0043226,GO:0043227,GO:0043229,GO:0043231,GO:0043412,GO:0043414,GO:0044237,GO:0044238,GO:0044260,GO:0044424,GO:…	-	-	-	-	-	-	-	-	-	-	MT-A70
LOC119646157	83.9923	152.564	138.179	41.8865	34.7443	43.8861	93.4037	135.059	88.6087	55.6679	90.9627	43.8837	89.9413	29.8897	94.6061	92.9307	72.6738	108.489	143.721	83.7431	117.286	106.105	40.0102	86.478	89.7329	98.8273	172.179	99.1391	NA	NA	NA	NA	NA	NA	NA	NA	NA	NA	NA	NA	NA	NA	NA	NA	NA	NA	NA	NA	NA
LOC119646158	20.9967	229.177	272.308	30.3317	71.2183	84.1133	126.885	190.539	161.484	68.827	60.9249	88.646	132.851	32.0243	166.946	113.667	167.15	187.623	201.205	227.738	172.63	152.401	99.125	190.074	101.366	153.325	197.971	226.486	XP_037902458.1	7213.XP_004526329.1	1.04e-100	370	COG5244@1|root,KOG4568@2759|Eukaryota,38C49@33154|Opisthokonta,3B97D@33208|Metazoa,3CT1N@33213|Bilateria,4204S@6656|Arthropoda,3SNIC@50557|Insecta,44YI3@7147|Diptera	33208|Metazoa	Z	microtubule anchoring	CEP350	GO:0005575,GO:0005622,GO:0005623,GO:0005737,GO:0005813,GO:0005814,GO:0005815,GO:0005856,GO:0015630,GO:0043226,GO:0043228,GO:0043229,GO:0043232,GO:0044422,GO:0044424,GO:0044430,GO:0044444,GO:0044446,GO:0044450,GO:0044464	-	ko:K16768	-	-	-	-	ko00000,ko03036	-	-	-	CAP_GLY,DUF4378
LOC119646159	54.138	37.9317	92.7569	128.7	119.851	60.845	62.3927	123.688	99.5933	130.032	9.30057	207.652	117.503	10.6643	23.5504	82.2414	0	2.55887	173.253	4.45393	0	0	9.22446	0	0	0	49.4468	0	XP_037902459.1	7370.XP_005190597.1	1.05e-07	54.7	2C51N@1|root,2T2AN@2759|Eukaryota,3AVBD@33154|Opisthokonta,3C3FV@33208|Metazoa,3DK8J@33213|Bilateria,4239P@6656|Arthropoda,3SRYT@50557|Insecta,454V4@7147|Diptera	33208|Metazoa	S	Odorant binding protein	Obp19d	GO:0003008,GO:0003674,GO:0005488,GO:0005549,GO:0005550,GO:0005575,GO:0005576,GO:0005615,GO:0007600,GO:0007606,GO:0007608,GO:0008150,GO:0032501,GO:0044421,GO:0050877	-	-	-	-	-	-	-	-	-	-	PBP_GOBP
LOC119646161	861.26	833.175	973.034	1245.13	734.814	812.389	872.214	624.756	938.509	1050.45	1086.25	1139.73	749.716	1106.27	714.585	950.806	982.57	794.221	1092.3	1040.35	872.878	553.601	1148.54	878.788	726.498	797.03	572.237	513.998	XP_037902462.1	43151.ADAC007876-PA	6.61e-178	505	COG5029@1|root,KOG0367@2759|Eukaryota,38GDH@33154|Opisthokonta,3BFI7@33208|Metazoa,3D18G@33213|Bilateria,41Y4M@6656|Arthropoda,3SJR8@50557|Insecta,45133@7147|Diptera,45ET8@7148|Nematocera	33208|Metazoa	O	Geranylgeranyl transferase type-1 subunit beta	PGGT1B	GO:0003674,GO:0003824,GO:0004659,GO:0004661,GO:0004662,GO:0005488,GO:0005515,GO:0005575,GO:0005622,GO:0005623,GO:0005953,GO:0006464,GO:0006807,GO:0007275,GO:0007507,GO:0008150,GO:0008152,GO:0008270,GO:0008284,GO:0008318,GO:0009790,GO:0009888,GO:0009889,GO:0009890,GO:0009892,GO:0009987,GO:0010033,GO:0010556,GO:0010558,GO:0010605,GO:0016740,GO:0016765,GO:0018342,GO:0018344,GO:0019222,GO:0019538,GO:…	2.5.1.59	ko:K11713	-	-	-	-	ko00000,ko01000,ko01006	-	-	-	Prenyltrans
LOC119646162	5498.68	922.392	621.955	4054.8	2547.6	2313.76	666.724	697.709	742.386	1290.83	2033.78	1800.28	607.09	3151.94	686.446	514.502	540.567	567.759	547.487	594.481	519.601	584.682	2236.54	729.683	1022	947.545	647.837	687.317	XP_037902463.1	7176.CPIJ010483-PA	7.04e-69	211	COG5162@1|root,KOG3423@2759|Eukaryota,3A6XY@33154|Opisthokonta,3BREK@33208|Metazoa,3D88B@33213|Bilateria,41ZWD@6656|Arthropoda,3SN7D@50557|Insecta,453Y8@7147|Diptera,45I64@7148|Nematocera	33208|Metazoa	K	TFIID is a multimeric protein complex that plays a central role in mediating promoter responses to various activators and repressors	TAF10	GO:0000082,GO:0000123,GO:0000124,GO:0000125,GO:0000278,GO:0000428,GO:0001889,GO:0003674,GO:0003676,GO:0003677,GO:0003712,GO:0003713,GO:0005102,GO:0005488,GO:0005515,GO:0005575,GO:0005622,GO:0005623,GO:0005634,GO:0005654,GO:0005667,GO:0005669,GO:0005737,GO:0006139,GO:0006325,GO:0006351,GO:0006352,GO:0006355,GO:0006357,GO:0006366,GO:0006367,GO:0006464,GO:0006473,GO:0006475,GO:0006508,GO:0006725,GO:…	5.3.3.2	ko:K01823,ko:K03134	ko00900,ko01100,ko01110,ko01130,ko03022,ko05168,map00900,map01100,map01110,map01130,map03022,map05168	M00095,M00096,M00364,M00365,M00366,M00367	R01123	RC00455	ko00000,ko00001,ko00002,ko01000,ko03021,ko03036	-	-	-	TFIID_30kDa
LOC119646164	80.1003	147.627	138.31	82.1559	44.7055	111.263	110.676	130.79	108.13	74.6964	94.612	87.8654	129.494	56.6363	109.077	92.1589	137.669	176.034	155.676	94.197	122.392	84.6749	93.0492	92.6887	122.885	96.4935	146.579	101.463	XP_037902466.1	7220.FBpp0140465	7.77e-89	293	KOG1721@1|root,KOG1721@2759|Eukaryota,3AKZ4@33154|Opisthokonta,3C0KF@33208|Metazoa,3DGM6@33213|Bilateria,422JF@6656|Arthropoda,3SQHT@50557|Insecta,44YZW@7147|Diptera,45SK0@7214|Drosophilidae	33208|Metazoa	S	nucleic acid binding	-	GO:0000976,GO:0001067,GO:0003674,GO:0003676,GO:0003677,GO:0003690,GO:0003700,GO:0005488,GO:0005575,GO:0005622,GO:0005623,GO:0005634,GO:0006355,GO:0008150,GO:0009889,GO:0010468,GO:0010556,GO:0019219,GO:0019222,GO:0031323,GO:0031326,GO:0043226,GO:0043227,GO:0043229,GO:0043231,GO:0043565,GO:0044212,GO:0044424,GO:0044464,GO:0050789,GO:0050794,GO:0051171,GO:0051252,GO:0060255,GO:0065007,GO:0080090,GO:…	-	-	-	-	-	-	-	-	-	-	zf-AD,zf-C2H2,zf-C2H2_4,zf-C2H2_6,zf-met
LOC119646166	210.947	276.595	306.472	577.774	126.383	330.153	344.246	323.018	157.373	205.586	591.528	151.887	239.404	565.506	320.293	153.604	273.258	316.629	260.892	210.546	230.459	372.704	170.537	322.622	291.726	253.271	220.815	282.816	XP_037902470.1	43151.ADAC007605-PA	4.77e-147	436	KOG1479@1|root,KOG1479@2759|Eukaryota,39721@33154|Opisthokonta,3BBIR@33208|Metazoa,3CYY8@33213|Bilateria,41URQ@6656|Arthropoda,3SJZW@50557|Insecta,44YE2@7147|Diptera,45E2S@7148|Nematocera	33208|Metazoa	F	Equilibrative nucleoside transporter	SLC29A1	GO:0001666,GO:0001678,GO:0003008,GO:0003674,GO:0005215,GO:0005337,GO:0005575,GO:0005622,GO:0005623,GO:0005634,GO:0005730,GO:0005886,GO:0005887,GO:0006139,GO:0006725,GO:0006807,GO:0006810,GO:0006863,GO:0006950,GO:0007154,GO:0007165,GO:0007166,GO:0007267,GO:0007268,GO:0007275,GO:0007589,GO:0007595,GO:0008150,GO:0008152,GO:0008283,GO:0009628,GO:0009719,GO:0009725,GO:0009743,GO:0009746,GO:0009749,GO:…	-	ko:K15014	-	-	-	-	ko00000,ko02000	2.A.57.1	-	-	Nucleoside_tran
LOC119646167	476.559	1283.99	1683.86	728.153	1494.43	1201.08	2008.18	2197.73	1777.76	1697.19	1496.59	1202.83	2626.1	906.9	2185.28	1967.81	2358.48	2706.05	2925.04	2611.63	2324.47	2509.99	1812.55	2856.7	1994.22	3128.8	3004.82	2810.53	XP_037902473.1	7213.XP_004526327.1	1.68e-234	688	KOG4091@1|root,KOG4091@2759|Eukaryota,38FS2@33154|Opisthokonta,3BCA7@33208|Metazoa,3CSZ6@33213|Bilateria,41VGK@6656|Arthropoda,3SFMH@50557|Insecta,44Z1S@7147|Diptera	33208|Metazoa	K	CP2 transcription factor	gem	GO:0003674,GO:0003676,GO:0003677,GO:0003700,GO:0005488,GO:0005575,GO:0005622,GO:0005623,GO:0005634,GO:0006355,GO:0006357,GO:0008150,GO:0009889,GO:0010468,GO:0010556,GO:0019219,GO:0019222,GO:0031323,GO:0031326,GO:0043226,GO:0043227,GO:0043229,GO:0043231,GO:0043565,GO:0044424,GO:0044464,GO:0050789,GO:0050794,GO:0051171,GO:0051252,GO:0060255,GO:0065007,GO:0080090,GO:0097159,GO:0140110,GO:1901363,GO:…	-	ko:K09275	-	-	-	-	ko00000,ko03000	-	-	-	CP2
LOC119646168	22.3643	40.3339	35.0321	77.9984	12.1301	28.0252	14.9706	27.1907	53.0071	24.3019	51.8378	57.9402	35.4934	65.0947	39.6154	45.3132	39.2443	33.1922	40.698	29.4299	23.7088	44.138	80.1901	34.2411	59.005	27.7245	35.6602	35.4559	XP_037902475.1	7159.AAEL001784-PA	1.41e-90	284	COG0590@1|root,KOG2771@2759|Eukaryota,38EK3@33154|Opisthokonta,3BGQN@33208|Metazoa,3CX5T@33213|Bilateria,41ZN2@6656|Arthropoda,3SMRV@50557|Insecta,4503Z@7147|Diptera,45GP1@7148|Nematocera	33208|Metazoa	A	Cytidine and deoxycytidylate deaminase zinc-binding region	ADAT3	GO:0005575,GO:0005622,GO:0005623,GO:0005634,GO:0005654,GO:0006139,GO:0006725,GO:0006807,GO:0008150,GO:0008152,GO:0009451,GO:0009987,GO:0016070,GO:0031974,GO:0031981,GO:0034641,GO:0043170,GO:0043226,GO:0043227,GO:0043229,GO:0043231,GO:0043233,GO:0043412,GO:0044237,GO:0044238,GO:0044422,GO:0044424,GO:0044428,GO:0044446,GO:0044464,GO:0046483,GO:0070013,GO:0071704,GO:0090304,GO:1901360	-	ko:K15442	-	-	-	-	ko00000,ko03016	-	-	-	dCMP_cyt_deam_1
LOC119646170	605.146	231.601	184.436	316.345	498.758	294.648	139.878	200.425	156.572	216.844	290.182	121.194	179.216	234.637	173.497	167.427	188.957	141.757	126.765	128.351	115.814	114.8	279.812	171.288	186.228	111.927	131.325	157.877	XP_037902476.1	7217.FBpp0120828	1.27e-143	416	COG5152@1|root,KOG1813@2759|Eukaryota,38BQR@33154|Opisthokonta,3BHF3@33208|Metazoa,3CSXG@33213|Bilateria,41XPT@6656|Arthropoda,3SKMX@50557|Insecta,44X5K@7147|Diptera,45S4P@7214|Drosophilidae	33208|Metazoa	O	Zinc ion binding	RNF113A	GO:0000375,GO:0000377,GO:0000398,GO:0003674,GO:0003824,GO:0004842,GO:0005488,GO:0005575,GO:0005622,GO:0005623,GO:0005634,GO:0005681,GO:0005684,GO:0006139,GO:0006396,GO:0006397,GO:0006464,GO:0006725,GO:0006807,GO:0007275,GO:0007399,GO:0008150,GO:0008152,GO:0008270,GO:0008380,GO:0009987,GO:0010467,GO:0010468,GO:0016070,GO:0016071,GO:0016074,GO:0016567,GO:0016740,GO:0019219,GO:0019222,GO:0019538,GO:…	-	ko:K13127,ko:K15696	-	-	-	-	ko00000,ko03041,ko04121	-	-	-	zf-C3HC4_3,zf-CCCH
LOC119646171	2.79398	161.23	231.033	23.111	105.607	182.741	301.985	289.564	278.302	216.727	225.904	142.229	317.83	90.6942	333.492	383.242	470.933	571.976	398.517	438.764	329.227	523.378	215.225	483.934	323.31	284.7	349.055	416.569	NA	NA	NA	NA	NA	NA	NA	NA	NA	NA	NA	NA	NA	NA	NA	NA	NA	NA	NA	NA	NA
LOC119646172	298.52	481.477	564.835	366.899	186.522	226.496	332.6	347.726	478.81	319.147	258.17	308.234	346.836	295.458	424.831	526.859	308.144	256.679	351.651	303.772	313.271	307.79	266.845	271.333	240.252	283.934	303.615	343.166	XP_037902478.1	7213.XP_004536748.1	1.35e-153	442	KOG0131@1|root,KOG0131@2759|Eukaryota,38C32@33154|Opisthokonta,3BGP3@33208|Metazoa,3CRYJ@33213|Bilateria,41V2G@6656|Arthropoda,3SI2E@50557|Insecta,44XD3@7147|Diptera	33208|Metazoa	A	nucleic acid binding	SF3B4	GO:0000375,GO:0000377,GO:0000398,GO:0003674,GO:0003676,GO:0003723,GO:0003729,GO:0005488,GO:0005515,GO:0005575,GO:0005622,GO:0005623,GO:0005634,GO:0005654,GO:0005681,GO:0005686,GO:0005689,GO:0006139,GO:0006396,GO:0006397,GO:0006725,GO:0006807,GO:0008150,GO:0008152,GO:0008380,GO:0009987,GO:0010467,GO:0016070,GO:0016071,GO:0030532,GO:0031974,GO:0031981,GO:0032991,GO:0034641,GO:0043170,GO:0043226,GO:…	-	ko:K07951,ko:K12831	ko03040,map03040	M00352	-	-	ko00000,ko00001,ko00002,ko03036,ko03041,ko04031,ko04147	-	-	-	RRM_1
LOC119646173	12.567	6.2474	1.34982	0	0	4.88521	0	7.09608	1.66357	1.01766	0.807048	13.2267	0.829218	2.13993	2.08722	1.54153	18.9592	0	5.99755	36.6553	3.95809	2.28968	4.60397	10.8641	16.6928	0	0	0.807762	XP_037902481.1	7217.FBpp0119973	9.37e-52	175	COG2032@1|root,KOG0441@2759|Eukaryota,38VQQ@33154|Opisthokonta,3C60E@33208|Metazoa,3DM29@33213|Bilateria,4256N@6656|Arthropoda,3SRHS@50557|Insecta,454AF@7147|Diptera,45PYU@7214|Drosophilidae	33208|Metazoa	P	ion binding. It is involved in the biological process described with	CUSOD1	GO:0000302,GO:0000303,GO:0000305,GO:0003674,GO:0003824,GO:0004784,GO:0005488,GO:0005507,GO:0005575,GO:0005576,GO:0005615,GO:0005622,GO:0005623,GO:0005737,GO:0006801,GO:0006950,GO:0006979,GO:0008150,GO:0008152,GO:0008270,GO:0009636,GO:0009987,GO:0010035,GO:0016209,GO:0016491,GO:0016721,GO:0019430,GO:0033554,GO:0034599,GO:0034614,GO:0042221,GO:0043167,GO:0043169,GO:0044237,GO:0044421,GO:0044424,GO:…	1.15.1.1	ko:K04565	ko04146,ko04213,ko05014,ko05016,ko05020,map04146,map04213,map05014,map05016,map05020	-	-	-	ko00000,ko00001,ko01000	-	-	-	Sod_Cu
LOC119646175	1676.78	1869.14	2185.43	4792.02	3099.58	1537.39	1983.4	1641.6	871.089	1789.41	2188.71	1924.25	2884.43	2220.98	1111.95	1460.39	2446.52	10096	254.8	2578.76	9253.39	9043.29	214.553	5805.47	3672.6	17410.5	2613.55	11600.2	XP_037902486.1	136037.KDR14962	8.37e-105	328	COG3325@1|root,KOG2806@2759|Eukaryota,38BJK@33154|Opisthokonta,3BA7Q@33208|Metazoa,3CS5K@33213|Bilateria,41V8B@6656|Arthropoda,3SI9U@50557|Insecta	33208|Metazoa	G	It is involved in the biological process described with carbohydrate metabolic process	CHIA	GO:0001817,GO:0001819,GO:0002376,GO:0002532,GO:0002791,GO:0002793,GO:0003674,GO:0003796,GO:0003824,GO:0004553,GO:0004568,GO:0005488,GO:0005515,GO:0005575,GO:0005576,GO:0005615,GO:0005622,GO:0005623,GO:0005737,GO:0005975,GO:0005976,GO:0006022,GO:0006026,GO:0006030,GO:0006032,GO:0006037,GO:0006040,GO:0006807,GO:0006950,GO:0006952,GO:0006954,GO:0006955,GO:0007275,GO:0007586,GO:0007591,GO:0008061,GO:…	3.2.1.14	ko:K01183	ko00520,ko01100,map00520,map01100	-	R01206,R02334	RC00467	ko00000,ko00001,ko01000	-	GH18	-	CBM_14,Glyco_hydro_18,LysM,Self-incomp_S1
LOC119646176	236.434	590.327	670.533	186.326	1528.93	915.339	1219.23	2234.26	351.142	291.548	261.404	234.362	1067.06	205.997	1203.01	433.164	518.894	442.929	1121.96	595.397	835.326	290.403	606.129	749.567	221.03	379.696	692.594	382.011	XP_037902487.1	7213.XP_004536316.1	1.37e-195	614	28Q03@1|root,2QWNT@2759|Eukaryota,39TTV@33154|Opisthokonta,3B9GV@33208|Metazoa,3D108@33213|Bilateria,420X0@6656|Arthropoda,3SZ5X@50557|Insecta,45113@7147|Diptera	33208|Metazoa	-	-	-	-	-	-	-	-	-	-	-	-	-	-	-
LOC119646177	58.7611	75.1866	41.7825	38.9983	22.5623	4.87536	23.7859	28.2561	28.1575	23.2831	40.0856	17.5551	27.2334	26.6838	27.8158	35.329	24.7092	62.5459	92.2012	52.922	44.7972	59.8846	62.7937	54.0549	31.5755	60.0484	67.5141	58.8333	XP_037902488.1	121225.PHUM037390-PA	2.8e-149	432	KOG3913@1|root,KOG3913@2759|Eukaryota,38FGN@33154|Opisthokonta,3BA3V@33208|Metazoa,3CS34@33213|Bilateria,41V6U@6656|Arthropoda,3SHI0@50557|Insecta,3E816@33342|Paraneoptera	33208|Metazoa	T	Ligand for members of the frizzled family of seven transmembrane receptors	-	GO:0001664,GO:0003674,GO:0005102,GO:0005109,GO:0005488,GO:0005515,GO:0005575,GO:0005576,GO:0005615,GO:0007154,GO:0007165,GO:0007166,GO:0007267,GO:0007275,GO:0007399,GO:0008150,GO:0009987,GO:0016055,GO:0022008,GO:0023052,GO:0030154,GO:0030182,GO:0032501,GO:0032502,GO:0044421,GO:0045165,GO:0048699,GO:0048731,GO:0048856,GO:0048869,GO:0050789,GO:0050794,GO:0050896,GO:0051716,GO:0065007,GO:0198738,GO:…	-	ko:K00182,ko:K00408,ko:K00444,ko:K00572	ko04150,ko04310,ko04360,ko04390,ko04550,ko04916,ko04919,ko04934,ko05165,ko05166,ko05200,ko05205,ko05217,ko05224,ko05225,ko05226,map04150,map04310,map04360,map04390,map04550,map04916,map04919,map04934,map05165,map05166,map05200,map05205,map05217,map05224,map05225,map05226	M00677	-	-	ko00000,ko00001,ko00002,ko00536	-	-	-	wnt
LOC119646179	13.9247	2.7692	3.36421	7.22456	0	4.86961	0	1.04254	3.31556	9.12656	0	1.7575	0	19.1968	0.693629	1.53648	7.26748	0	0	0	5.26092	15.9565	9.16834	0	2.49519	3.70371	0	7.2462	NA	NA	NA	NA	NA	NA	NA	NA	NA	NA	NA	NA	NA	NA	NA	NA	NA	NA	NA	NA	NA
LOC119646180	53708.6	24894.7	4368.89	650.755	2156.33	794.552	9176.57	5117.22	3645.47	99.7649	1506.04	103.954	789.222	1898.62	15731.3	61.4171	4015.08	11120.8	4960.21	3798.68	4762.71	19107.1	10188.7	19678.4	11635.2	16227.5	13001	29236.1	NA	NA	NA	NA	NA	NA	NA	NA	NA	NA	NA	NA	NA	NA	NA	NA	NA	NA	NA	NA	NA
LOC119646183	4345.11	1804.38	1377.03	956.235	6002.36	2937.7	1261.2	968.429	1183.71	2880.94	2255.6	2456.86	1913.95	3135.27	1758.96	1780.27	8674.52	10256	5453.02	3449.9	3042.5	4798.03	9165.43	10638.4	2621.74	6390.27	2972.79	5065	XP_037902493.1	7370.XP_005181035.1	1.62e-202	570	COG0075@1|root,KOG2862@2759|Eukaryota,38BJD@33154|Opisthokonta,3BC61@33208|Metazoa,3CYZ6@33213|Bilateria,41WJQ@6656|Arthropoda,3SIYP@50557|Insecta,44Y0I@7147|Diptera	33208|Metazoa	E	It is involved in the biological process described with metabolic process	AGXT	GO:0000096,GO:0000098,GO:0001505,GO:0003674,GO:0003824,GO:0004760,GO:0005102,GO:0005488,GO:0005515,GO:0005575,GO:0005622,GO:0005623,GO:0005737,GO:0005739,GO:0005759,GO:0005777,GO:0005782,GO:0005829,GO:0006081,GO:0006082,GO:0006090,GO:0006520,GO:0006522,GO:0006524,GO:0006534,GO:0006544,GO:0006545,GO:0006605,GO:0006625,GO:0006790,GO:0006807,GO:0006810,GO:0006811,GO:0006820,GO:0006835,GO:0006886,GO:…	2.6.1.44,2.6.1.45,2.6.1.51	ko:K00830	ko00250,ko00260,ko00630,ko00680,ko01100,ko01110,ko01120,ko01130,ko01200,ko04146,map00250,map00260,map00630,map00680,map01100,map01110,map01120,map01130,map01200,map04146	M00346,M00532	R00369,R00372,R00585,R00588	RC00006,RC00008,RC00018	ko00000,ko00001,ko00002,ko01000,ko01007	-	-	-	Aminotran_5
LOC119646184	1688.72	827.555	649.284	1128.11	257.896	556.727	370.636	328.208	846.512	534.75	604.191	930.658	477.172	744.736	580.088	831.765	360.468	397.072	434.396	335.749	372.667	292.349	591.987	329.841	474.586	429.846	404.46	433.48	XP_037902494.1	7213.XP_004537576.1	5.78e-264	734	KOG0289@1|root,KOG0289@2759|Eukaryota,38CRU@33154|Opisthokonta,3BF9F@33208|Metazoa,3CV5N@33213|Bilateria,41TS8@6656|Arthropoda,3SHG1@50557|Insecta,44WXJ@7147|Diptera	33208|Metazoa	S	Ubiquitin-protein transferase activity. It is involved in the biological process described with protein ubiquitination	PRPF19	GO:0000075,GO:0000077,GO:0000209,GO:0000244,GO:0000245,GO:0000349,GO:0000375,GO:0000377,GO:0000381,GO:0000387,GO:0000393,GO:0000398,GO:0000726,GO:0000974,GO:0001701,GO:0001824,GO:0001832,GO:0001833,GO:0003674,GO:0003824,GO:0004842,GO:0005488,GO:0005515,GO:0005575,GO:0005622,GO:0005623,GO:0005634,GO:0005654,GO:0005681,GO:0005684,GO:0005694,GO:0005737,GO:0005811,GO:0006139,GO:0006259,GO:0006281,GO:…	2.3.2.27	ko:K10599	ko03040,ko04120,map03040,map04120	M00353,M00355	-	-	ko00000,ko00001,ko00002,ko01000,ko03041,ko03400,ko04121	-	-	-	Prp19,U-box,WD40
LOC119646185	2260.24	556.344	1655.28	2481.5	1781.45	2958.51	8003.18	7143.94	992.224	1176.61	3454.65	1755.76	648.783	2448	5583.07	3114.32	1748.55	1720.88	768.48	1341.97	895.672	2187.58	695.263	4229.65	665.674	301.271	638.847	1332.82	XP_037902495.1	7370.XP_005190408.1	0	912	2C4CE@1|root,2S0I4@2759|Eukaryota,3A3A1@33154|Opisthokonta,3BR3C@33208|Metazoa,3D8Y6@33213|Bilateria,42AUZ@6656|Arthropoda,3SQWF@50557|Insecta,44YBZ@7147|Diptera	33208|Metazoa	E	Oxidoreductase activity. It is involved in the biological process described with metabolic process	PPO1	GO:0002376,GO:0003674,GO:0003824,GO:0004097,GO:0004497,GO:0004503,GO:0005575,GO:0005576,GO:0006082,GO:0006520,GO:0006570,GO:0006582,GO:0006583,GO:0006584,GO:0006725,GO:0006807,GO:0006950,GO:0006952,GO:0006955,GO:0006959,GO:0007599,GO:0008150,GO:0008152,GO:0009058,GO:0009072,GO:0009605,GO:0009607,GO:0009611,GO:0009617,GO:0009620,GO:0009712,GO:0009987,GO:0016491,GO:0016679,GO:0016682,GO:0016705,GO:…	1.14.18.1	ko:K00505	ko00350,ko00950,ko00965,ko01100,ko01110,ko04916,map00350,map00950,map00965,map01100,map01110,map04916	M00042	R00731,R02078,R02363,R02383,R04693,R04884	RC00046,RC00150,RC00180	ko00000,ko00001,ko00002,ko01000	-	-	-	Hemocyanin_C,Hemocyanin_M,Hemocyanin_N
LOC119646187	11.1923	82.8422	94.3468	80.8855	29.5034	39.0026	74.881	75.3483	72.8785	43.5296	35.0759	38.6213	60.244	28.8184	52.154	55.2975	58.1393	37.0171	58.673	52.9233	36.8916	61.017	70.0764	38.7395	47.3635	50.8106	43.9982	54.8034	XP_037902498.1	7213.XP_004527468.1	0	1243	COG0199@1|root,COG1643@1|root,KOG0922@2759|Eukaryota,KOG1741@2759|Eukaryota,38BD3@33154|Opisthokonta,3B9GM@33208|Metazoa,3CV48@33213|Bilateria,41YEP@6656|Arthropoda,3SK6Y@50557|Insecta,44YVW@7147|Diptera	33208|Metazoa	A	nucleic acid binding	DHX34	GO:0000956,GO:0003674,GO:0003676,GO:0003723,GO:0003724,GO:0003824,GO:0004004,GO:0004386,GO:0005488,GO:0005575,GO:0005622,GO:0005623,GO:0005737,GO:0006139,GO:0006396,GO:0006401,GO:0006402,GO:0006725,GO:0006807,GO:0008026,GO:0008150,GO:0008152,GO:0008186,GO:0009056,GO:0009057,GO:0009892,GO:0009893,GO:0009894,GO:0009895,GO:0009987,GO:0010467,GO:0010468,GO:0010604,GO:0010605,GO:0010628,GO:0010629,GO:…	3.6.4.13	ko:K20101	-	-	-	-	ko00000,ko01000,ko03019	-	-	-	DEAD,HA2,Helicase_C,OB_NTP_bind
LOC119646188	168.883	111.075	97.6363	197.892	46.6737	36.538	62.4867	47.0095	60.4695	56.7282	64.4975	97.4673	49.5419	68.2734	38.192	72.9617	31.9771	28.0919	59.817	19.1589	59.2429	64.675	58.4406	35.1523	70.6561	64.7268	40.9834	18.5294	XP_037902499.1	7176.CPIJ007194-PA	1.8e-108	328	COG0122@1|root,KOG2875@2759|Eukaryota,38GBH@33154|Opisthokonta,3BG64@33208|Metazoa,3CZUC@33213|Bilateria,41WI1@6656|Arthropoda,3SFRJ@50557|Insecta,44XZJ@7147|Diptera,45E57@7148|Nematocera	33208|Metazoa	L	8-oxoguanine DNA glycosylase, N-terminal domain	OGG1	GO:0000702,GO:0001101,GO:0002526,GO:0003674,GO:0003676,GO:0003677,GO:0003684,GO:0003824,GO:0003906,GO:0004518,GO:0004519,GO:0005488,GO:0005515,GO:0005575,GO:0005622,GO:0005623,GO:0005634,GO:0005654,GO:0005737,GO:0005739,GO:0006139,GO:0006220,GO:0006244,GO:0006259,GO:0006281,GO:0006282,GO:0006284,GO:0006285,GO:0006289,GO:0006304,GO:0006355,GO:0006725,GO:0006753,GO:0006793,GO:0006796,GO:0006807,GO:…	4.2.99.18	ko:K03660,ko:K20315	ko03410,map03410	-	-	-	ko00000,ko00001,ko01000,ko03400,ko04131	-	-	-	HhH-GPD,OGG_N
LOC119646190	526.128	446.322	331.581	213.768	152.767	203.556	337.428	202.001	409.107	276.349	345.676	249.276	262.423	246.567	372.764	321.801	249.999	194.016	311.346	263.1	300.42	264.329	242.935	230.627	307.439	264.198	348.181	307.875	XP_037902502.1	7370.XP_005177641.1	0	989	KOG1127@1|root,KOG1127@2759|Eukaryota,38B8M@33154|Opisthokonta,3BCFI@33208|Metazoa,3CZ85@33213|Bilateria,41UKE@6656|Arthropoda,3SGCN@50557|Insecta,450NE@7147|Diptera	33208|Metazoa	A	Tetratricopeptide repeat	TTC37	GO:0000288,GO:0000291,GO:0000785,GO:0000956,GO:0005575,GO:0005622,GO:0005623,GO:0005634,GO:0005654,GO:0005694,GO:0005737,GO:0005829,GO:0006139,GO:0006401,GO:0006402,GO:0006725,GO:0006807,GO:0008150,GO:0008152,GO:0009056,GO:0009057,GO:0009892,GO:0009987,GO:0010468,GO:0010605,GO:0010629,GO:0016070,GO:0016071,GO:0019222,GO:0019439,GO:0031974,GO:0031981,GO:0032991,GO:0034641,GO:0034655,GO:0035327,GO:…	-	ko:K12600	ko03018,map03018	M00392	-	-	ko00000,ko00001,ko00002,ko03019	-	-	-	TPR_16,TPR_2,TPR_8
LOC119646192	299.295	244.255	529.629	284.546	126.621	251.054	539.069	345.261	355.294	378.642	514.661	552.138	311.971	530.432	264.194	532.239	850.29	291.045	251.424	679.419	374.144	932.745	136.576	1116.31	391.392	90.5468	257.938	212.755	XP_037902503.1	7237.FBpp0277827	2.65e-225	664	COG2234@1|root,KOG2194@2759|Eukaryota,38F29@33154|Opisthokonta,3BCDX@33208|Metazoa,3CTWE@33213|Bilateria,41V7T@6656|Arthropoda,3SQQR@50557|Insecta,44XRQ@7147|Diptera,45SS4@7214|Drosophilidae	33208|Metazoa	O	Peptidase family M20/M25/M40	-	-	-	-	-	-	-	-	-	-	-	-	Peptidase_M28
LOC119646194	122.965	175.874	136.745	167.553	239.01	181.537	220.127	277.07	139.148	129.622	136.338	111.497	155.192	149.387	173.719	114.435	155.524	128.945	174.741	111.871	165.944	170.988	131.279	185.634	124.665	213.505	184.383	211.113	XP_037902506.1	7370.XP_005185734.1	6.56e-108	318	KOG0092@1|root,KOG0092@2759|Eukaryota,3A22T@33154|Opisthokonta,3BQZZ@33208|Metazoa,3D6BU@33213|Bilateria,41Z0U@6656|Arthropoda,3SM9R@50557|Insecta,451PZ@7147|Diptera	33208|Metazoa	U	GTP binding. It is involved in the biological process described with protein transport	-	GO:0003674,GO:0003824,GO:0003924,GO:0005575,GO:0006810,GO:0007154,GO:0007165,GO:0007264,GO:0007265,GO:0007275,GO:0007399,GO:0007422,GO:0008150,GO:0009987,GO:0016192,GO:0016462,GO:0016787,GO:0016817,GO:0016818,GO:0017111,GO:0023052,GO:0031982,GO:0032482,GO:0032501,GO:0032502,GO:0035556,GO:0043226,GO:0043227,GO:0048731,GO:0048856,GO:0050789,GO:0050794,GO:0050896,GO:0051179,GO:0051234,GO:0051716,GO:…	-	ko:K07890	-	-	-	-	ko00000,ko04031,ko04131,ko04147	-	-	-	Ras
LOC119646196	0	19.465	15.491	8.66456	0	26.7999	11.4451	7.3184	11.5928	17.2104	11.7041	14.0432	15.6799	21.3373	18.0651	18.4283	30.5165	28.0798	23.9337	16.1844	15.8018	16.9751	21.868	11.7116	46.5294	22.1754	12.1372	24.9743	XP_037902507.1	7217.FBpp0117717	1.55e-59	211	KOG2462@1|root,KOG2462@2759|Eukaryota,39RNQ@33154|Opisthokonta,3B9Z2@33208|Metazoa,3D6VB@33213|Bilateria,41VPX@6656|Arthropoda,3SHKT@50557|Insecta,452PX@7147|Diptera,45WW9@7214|Drosophilidae	33208|Metazoa	K	Metal ion binding	-	GO:0003674,GO:0003700,GO:0006355,GO:0006357,GO:0007275,GO:0007399,GO:0007405,GO:0007417,GO:0007420,GO:0008150,GO:0008283,GO:0008356,GO:0009889,GO:0009891,GO:0009893,GO:0009987,GO:0010468,GO:0010556,GO:0010557,GO:0010604,GO:0010628,GO:0017145,GO:0019219,GO:0019222,GO:0022008,GO:0030154,GO:0031323,GO:0031325,GO:0031326,GO:0031328,GO:0032501,GO:0032502,GO:0036445,GO:0045165,GO:0045893,GO:0045935,GO:…	-	ko:K09218	-	-	-	-	ko00000,ko03000	-	-	-	zf-C2H2
LOC119646197	23.7513	41.0075	35.0266	83.777	65.7993	35.3312	69.5563	63.7719	24.0199	40.5085	29.2799	51.7987	53.6583	103.501	37.5202	37.633	71.2214	82.9863	34.707	39.7493	44.7765	92.8767	51.9746	66.6859	157.912	32.3509	66.0154	51.5684	XP_037902508.1	7245.FBpp0264411	1.14e-22	105	KOG2462@1|root,KOG2462@2759|Eukaryota,39RNQ@33154|Opisthokonta,3B9Z2@33208|Metazoa,3D6VB@33213|Bilateria,41VPX@6656|Arthropoda,3SHKT@50557|Insecta,44Z49@7147|Diptera,45SZH@7214|Drosophilidae	33208|Metazoa	K	Metal ion binding	-	GO:0000122,GO:0000976,GO:0000977,GO:0001012,GO:0001067,GO:0001654,GO:0001655,GO:0001703,GO:0001704,GO:0001707,GO:0001708,GO:0001709,GO:0001710,GO:0002009,GO:0003002,GO:0003674,GO:0003676,GO:0003677,GO:0003690,GO:0005488,GO:0005515,GO:0005575,GO:0005622,GO:0005623,GO:0005634,GO:0006355,GO:0006357,GO:0007154,GO:0007267,GO:0007275,GO:0007369,GO:0007370,GO:0007389,GO:0007399,GO:0007405,GO:0007417,GO:…	-	ko:K09218	-	-	-	-	ko00000,ko03000	-	-	-	zf-C2H2
LOC119646198	37.6388	18.0218	1.34684	0	0	14.6201	1.76037	6.26348	5.80524	6.08735	7.56556	1.75846	0	50.1606	5.55397	5.38133	0	2.55683	0	0	1.31628	0	0	0	0	11.115	3.79968	2.41707	XP_037902509.1	7244.FBpp0237822	4.18e-54	181	2C57V@1|root,2S2XG@2759|Eukaryota,3A56E@33154|Opisthokonta,3BSBS@33208|Metazoa,3D8FD@33213|Bilateria,42078@6656|Arthropoda,3SN9X@50557|Insecta,453BG@7147|Diptera,45WY2@7214|Drosophilidae	33208|Metazoa	S	DM4/DM12 family of domains in Drosophila melanogaster proteins of unknown function.	-	-	-	-	-	-	-	-	-	-	-	-	DM4_12
LOC119646199	6.9966	18.8005	14.827	0	15.6247	25.5971	80.1733	11.5133	13.2504	8.09807	28.3878	15.7991	11.5531	1.0674	36.8599	12.2884	13.0813	6.38207	19.16	32.3353	6.58822	5.64776	20.9261	19.8194	34.0674	44.3405	26.5496	27.4026	XP_037902510.1	7217.FBpp0114251	2.56e-114	371	2C9WG@1|root,2TATF@2759|Eukaryota,395UF@33154|Opisthokonta,3CA8J@33208|Metazoa,3DRDG@33213|Bilateria,427HX@6656|Arthropoda,3SQDF@50557|Insecta,44XMW@7147|Diptera,45SNS@7214|Drosophilidae	33208|Metazoa	-	-	-	GO:0001700,GO:0005575,GO:0005622,GO:0005623,GO:0005813,GO:0005815,GO:0005856,GO:0006996,GO:0007010,GO:0007015,GO:0007049,GO:0007275,GO:0008150,GO:0009790,GO:0009792,GO:0009987,GO:0015630,GO:0016043,GO:0022402,GO:0030029,GO:0030036,GO:0030037,GO:0030588,GO:0030589,GO:0031532,GO:0032501,GO:0032502,GO:0043226,GO:0043228,GO:0043229,GO:0043232,GO:0044422,GO:0044424,GO:0044430,GO:0044446,GO:0044464,GO:…	-	-	-	-	-	-	-	-	-	-	-
LOC119646200	1199.28	120.902	78.3752	663.079	675.992	414.311	145.423	156.886	128.85	224.974	220.661	307.549	116.659	466.673	92.5172	86.7859	130.347	246.763	174.135	195.436	263.3	412.347	623.903	88.6258	256.672	278.084	190.248	137.775	XP_037902511.1	7227.FBpp0302899	1.44e-15	70.9	2F6YY@1|root,2T81I@2759|Eukaryota,392GD@33154|Opisthokonta,3C7V7@33208|Metazoa,3DNVU@33213|Bilateria,42550@6656|Arthropoda,3SUKY@50557|Insecta,454SD@7147|Diptera,45YTZ@7214|Drosophilidae	33208|Metazoa	-	-	-	-	-	-	-	-	-	-	-	-	-	-	-
LOC119646201	117.933	28.9529	29.5538	46.2318	49.6362	88.7618	23.7094	16.6205	40.6288	25.3712	58.2593	49.2255	25.627	63.9325	18.6886	28.4132	11.625	8.94755	4.77577	17.7936	13.1324	10.3171	45.1387	9.92946	23.2952	5.56251	14.4403	8.84777	NA	NA	NA	NA	NA	NA	NA	NA	NA	NA	NA	NA	NA	NA	NA	NA	NA	NA	NA	NA	NA
LOC119646202	391.356	161.326	794.272	423.214	3136.23	988.178	1072.58	2646.81	272.491	663.25	62.7111	629.447	910.458	21.3423	567.109	520.718	2648.26	3197.97	1735.62	2672.38	3183.51	4803.55	2709.34	5351.57	1179.28	3165.28	2430.99	951.66	XP_037902512.1	7213.XP_004521784.1	8.73e-80	272	COG0733@1|root,KOG3659@2759|Eukaryota,39QXY@33154|Opisthokonta,3CR3Y@33208|Metazoa,3E78Y@33213|Bilateria,42CTN@6656|Arthropoda,3T0P1@50557|Insecta,459F0@7147|Diptera	33208|Metazoa	P	Neurotransmitter sodium symporter activity. It is involved in the biological process described with neurotransmitter transport	-	GO:0005575,GO:0005623,GO:0005886,GO:0008150,GO:0016020,GO:0032879,GO:0040012,GO:0040017,GO:0044297,GO:0044298,GO:0044425,GO:0044459,GO:0044464,GO:0048518,GO:0048522,GO:0050789,GO:0050794,GO:0051270,GO:0051272,GO:0065007,GO:0071944,GO:1901317,GO:1902093,GO:2000145,GO:2000147	-	ko:K05038,ko:K05336	-	-	-	-	ko00000,ko02000	2.A.22,2.A.22.2	-	-	SNF
LOC119646203	114.71	154.529	72.1055	36.1097	32.9692	43.8767	98.6628	68.0179	70.3946	52.6419	50.1145	49.1551	59.42	65.1068	144.632	57.6016	21.8023	42.1235	95.7892	41.1667	38.2079	41.8149	79.1879	67.5702	60.6594	61.8989	59.9297	93.4867	XP_037902513.1	7165.AGAP006988-PA	0	1003	COG0515@1|root,KOG1026@2759|Eukaryota,38CP6@33154|Opisthokonta,3BC7R@33208|Metazoa,3CUG8@33213|Bilateria,41WZ1@6656|Arthropoda,3SG0E@50557|Insecta,452EU@7147|Diptera,45GMB@7148|Nematocera	33208|Metazoa	T	Belongs to the protein kinase superfamily. Tyr protein kinase family	MUSK	GO:0000902,GO:0000904,GO:0001654,GO:0001745,GO:0001751,GO:0001754,GO:0001932,GO:0001934,GO:0001941,GO:0003008,GO:0003674,GO:0003824,GO:0004672,GO:0004713,GO:0004714,GO:0004888,GO:0005488,GO:0005515,GO:0005575,GO:0005623,GO:0005886,GO:0005887,GO:0006355,GO:0006464,GO:0006468,GO:0006793,GO:0006796,GO:0006807,GO:0006928,GO:0006935,GO:0006950,GO:0006996,GO:0007154,GO:0007165,GO:0007166,GO:0007167,GO:…	2.7.10.1	ko:K05122,ko:K05129	-	-	-	-	ko00000,ko01000,ko01001,ko01020,ko04050	-	-	-	Fz,I-set,Ig_3,Kringle,Pkinase_Tyr
LOC119646204	29.1752	10.3529	26.2416	2.89585	387.193	1.21829	152.193	0	54.8478	13.2241	0	9.69152	4.97145	4.27081	14.561	38.4785	0	0	1903.12	0	0	0	1115.34	0	0	0	12.9493	0	NA	NA	NA	NA	NA	NA	NA	NA	NA	NA	NA	NA	NA	NA	NA	NA	NA	NA	NA	NA	NA
LOC119646205	15858.6	4653.67	6920.64	0	7467.83	2784.26	4634.88	7307.17	745.858	1142.97	4.31582	4288.23	3457.05	1.06413	3687.38	2845.05	3071.18	897.072	3609.52	3670.52	1400.82	1913.95	5860.84	4720.39	944.331	553.725	1869.38	1405.64	NA	NA	NA	NA	NA	NA	NA	NA	NA	NA	NA	NA	NA	NA	NA	NA	NA	NA	NA	NA	NA
LOC119646207	35.4482	3.37213	0	0	0	9.67977	1.74049	3.067	2.49057	0	6.90088	0.881201	0	66.9174	20.5308	0	60.8712	74.0916	175.18	25.5438	36.4767	257.68	678.513	81.2995	1626.67	3678.68	331.073	1608.42	NA	NA	NA	NA	NA	NA	NA	NA	NA	NA	NA	NA	NA	NA	NA	NA	NA	NA	NA	NA	NA
LOC119646208	627.025	852.466	1402.94	929.427	630.352	609.178	997.209	1175.15	1011.67	1271.85	526.965	717.935	1194.09	610.156	634.438	944.871	2028.8	1440.47	675.448	1794.86	2014.97	1818.53	535.224	1220.93	1694.78	894.289	881.875	1486.52	XP_037902517.1	43151.ADAC000962-PA	3.19e-203	602	KOG3626@1|root,KOG3626@2759|Eukaryota,3AHGA@33154|Opisthokonta,3BZ8T@33208|Metazoa,3DEQS@33213|Bilateria,4224B@6656|Arthropoda,3SKCI@50557|Insecta,450S5@7147|Diptera,45CWH@7148|Nematocera	33208|Metazoa	Q	Organic Anion Transporter Polypeptide (OATP) family	-	GO:0003674,GO:0005215,GO:0005575,GO:0005623,GO:0005886,GO:0005887,GO:0006810,GO:0006811,GO:0006820,GO:0008150,GO:0008509,GO:0008514,GO:0015075,GO:0015291,GO:0015347,GO:0015711,GO:0016020,GO:0016021,GO:0016328,GO:0022804,GO:0022857,GO:0031224,GO:0031226,GO:0034220,GO:0043252,GO:0044425,GO:0044459,GO:0044464,GO:0051179,GO:0051234,GO:0055085,GO:0071702,GO:0071944,GO:0098656	-	-	-	-	-	-	-	-	-	-	OATP
LOC119646209	194.31	233.687	280.267	85.2203	109.189	126.727	308.231	132.826	202.916	186.309	113.694	144.848	203.876	132.327	156.386	375.562	375.001	255.321	128.084	225.115	244.999	439.037	211.379	478.464	536.023	263.373	316.383	760.702	XP_037902520.1	7227.FBpp0088515	4.15e-214	616	COG0659@1|root,KOG0236@2759|Eukaryota,38C1D@33154|Opisthokonta,3BE0D@33208|Metazoa,3CTB7@33213|Bilateria,41X9M@6656|Arthropoda,3SIZA@50557|Insecta,44Y66@7147|Diptera,45T7U@7214|Drosophilidae	33208|Metazoa	P	Sulfate transmembrane transporter activity. It is involved in the biological process described with sulfate transport	SLC26A11	GO:0000003,GO:0000323,GO:0003674,GO:0005215,GO:0005216,GO:0005253,GO:0005254,GO:0005310,GO:0005342,GO:0005575,GO:0005622,GO:0005623,GO:0005634,GO:0005654,GO:0005737,GO:0005764,GO:0005765,GO:0005773,GO:0005774,GO:0005783,GO:0005794,GO:0005886,GO:0005887,GO:0006810,GO:0006811,GO:0006820,GO:0006821,GO:0006835,GO:0006873,GO:0006885,GO:0007610,GO:0007617,GO:0007618,GO:0007621,GO:0008150,GO:0008272,GO:…	-	ko:K14708	-	-	-	-	ko00000,ko02000	2.A.53.1	-	-	STAS,Sulfate_transp
LOC119646210	6206.89	2134.58	8039.93	23.1523	875.313	1370.33	742.393	2409.23	848.387	186.583	0.861293	1202.06	567.428	0	577.006	133.498	471.746	217.457	316.714	387.553	121.41	167.925	928.489	905.187	30.8187	62.4995	140.188	0	NA	NA	NA	NA	NA	NA	NA	NA	NA	NA	NA	NA	NA	NA	NA	NA	NA	NA	NA	NA	NA
LOC119646212	1920.22	1280.61	824.141	963.462	774.237	957.249	752.433	464.817	935.219	890.47	823.552	1165.25	668.839	914.191	1052.61	1032.98	542.158	736.791	781.164	610.237	862.268	632.173	942.563	662.506	971.752	957.089	731.653	758.88	XP_037902523.1	7213.XP_004524645.1	6e-215	594	COG1310@1|root,KOG1555@2759|Eukaryota,38G6Q@33154|Opisthokonta,3BA2E@33208|Metazoa,3D0E4@33213|Bilateria,41YE2@6656|Arthropoda,3SHBD@50557|Insecta,44ZVM@7147|Diptera	33208|Metazoa	O	26S proteasome non-ATPase regulatory subunit	PSMD14	GO:0000502,GO:0000724,GO:0000725,GO:0000726,GO:0001775,GO:0002252,GO:0002263,GO:0002274,GO:0002275,GO:0002283,GO:0002366,GO:0002376,GO:0002443,GO:0002444,GO:0002446,GO:0003674,GO:0003824,GO:0004175,GO:0004843,GO:0005488,GO:0005515,GO:0005575,GO:0005576,GO:0005622,GO:0005623,GO:0005634,GO:0005654,GO:0005737,GO:0005829,GO:0005838,GO:0006139,GO:0006259,GO:0006281,GO:0006302,GO:0006303,GO:0006310,GO:…	-	ko:K03030	ko03050,ko05169,map03050,map05169	M00341	-	-	ko00000,ko00001,ko00002,ko01002,ko03051,ko04121	-	-	-	JAB,MitMem_reg
LOC119646214	428.346	210.961	122.536	330.785	271.248	179.017	175.995	176.503	127.57	214.777	286.59	207.238	187.448	286.94	168.705	162.052	181.689	182.606	150.72	147.428	169.811	217.98	210.12	152.337	158.777	177.559	148.765	169.978	XP_037902524.1	7425.NV10317-PA	6.01e-27	112	KOG4454@1|root,KOG4454@2759|Eukaryota,39EK2@33154|Opisthokonta,3BCKZ@33208|Metazoa,3CW40@33213|Bilateria,420JT@6656|Arthropoda,3SNVG@50557|Insecta,46IV4@7399|Hymenoptera	33208|Metazoa	A	Pfam:RRM_6	RBM7	GO:0000381,GO:0003674,GO:0003676,GO:0003723,GO:0003727,GO:0003729,GO:0005488,GO:0005575,GO:0005622,GO:0005623,GO:0005634,GO:0005654,GO:0008150,GO:0010468,GO:0019219,GO:0019222,GO:0031323,GO:0031974,GO:0031981,GO:0043226,GO:0043227,GO:0043229,GO:0043231,GO:0043233,GO:0043484,GO:0044422,GO:0044424,GO:0044428,GO:0044446,GO:0044464,GO:0048024,GO:0050684,GO:0050789,GO:0050794,GO:0051171,GO:0051252,GO:…	-	ko:K13188	-	-	-	-	ko00000,ko03041	-	-	-	RRM_1
LOC119646217	5.46582	1.34815	23.9919	0	34.9676	19.5039	32.2848	28.6245	34.3714	14.4136	0	64.909	15.8361	0	6.86557	19.2471	1.45882	2.57173	121.174	1.52028	2.61546	0	88.3148	0.910094	0	0	170.228	0	NA	NA	NA	NA	NA	NA	NA	NA	NA	NA	NA	NA	NA	NA	NA	NA	NA	NA	NA	NA	NA
LOC119646218	227.758	282.919	272.14	193.553	112.572	224.178	229.81	271.837	234.398	140.762	227.516	188.755	258.379	177.129	283.505	222.726	236.92	252.785	286.046	228.164	284.473	191.38	186.897	202.757	269.277	224.598	265.573	274.768	XP_037902528.1	7176.CPIJ016790-PA	5.69e-283	782	KOG1812@1|root,KOG1812@2759|Eukaryota,38F4G@33154|Opisthokonta,3BDWF@33208|Metazoa,3CUBI@33213|Bilateria,41UGD@6656|Arthropoda,3SIVT@50557|Insecta,44XRA@7147|Diptera,45HA2@7148|Nematocera	33208|Metazoa	O	Zinc finger protein	ARIH2	GO:0000151,GO:0000209,GO:0002376,GO:0002520,GO:0003674,GO:0003824,GO:0004842,GO:0005488,GO:0005515,GO:0005575,GO:0005622,GO:0005623,GO:0005634,GO:0005654,GO:0005737,GO:0006464,GO:0006508,GO:0006511,GO:0006807,GO:0007275,GO:0008150,GO:0008152,GO:0008270,GO:0008283,GO:0009056,GO:0009057,GO:0009893,GO:0009894,GO:0009896,GO:0009987,GO:0010604,GO:0016049,GO:0016567,GO:0016740,GO:0019222,GO:0019538,GO:…	2.3.2.31	ko:K11969	-	-	-	-	ko00000,ko01000,ko04121	-	-	-	IBR
LOC119646220	162.151	88.3235	214.913	449.213	10235.3	414.294	330.242	378.595	183.039	166.06	80.259	481.075	143.623	133.393	2406.2	131.331	34.8838	199.152	196.312	453.192	44.7842	29.4222	114.808	320.781	57.3424	321.597	369.496	40.2911	XP_037902534.1	43151.ADAC007789-PA	1.83e-164	483	COG2124@1|root,KOG0159@2759|Eukaryota,38CZC@33154|Opisthokonta,3B9J4@33208|Metazoa,3CUCS@33213|Bilateria,41VNR@6656|Arthropoda,3SJDH@50557|Insecta,454XE@7147|Diptera,45HI6@7148|Nematocera	33208|Metazoa	Q	cytochrome P450	-	GO:0003674,GO:0003824,GO:0005575,GO:0005622,GO:0005623,GO:0005737,GO:0005739,GO:0008150,GO:0008152,GO:0009636,GO:0010033,GO:0014070,GO:0016491,GO:0017085,GO:0030342,GO:0042221,GO:0042493,GO:0043226,GO:0043227,GO:0043229,GO:0043231,GO:0044424,GO:0044444,GO:0044464,GO:0046680,GO:0050896,GO:0055114,GO:0070576	1.14.15.15	ko:K00488,ko:K15004,ko:K17951,ko:K17960	ko00120,ko01100,ko03320,ko04979,map00120,map01100,map03320,map04979	M00104	R04806,R04807,R08505,R08758,R08759,R08760,R08761,R11142	RC00099,RC00242,RC01216,RC03368	ko00000,ko00001,ko00002,ko00199,ko01000	-	-	-	p450
LOC119646221	0	66.0359	86.9588	91.7324	76.1939	47.6582	101.622	135.062	87.4166	72.2195	136.534	47.1645	144.368	69.9032	97.2192	89.329	187.523	301.899	307.853	196.757	208.652	120.406	125.341	261.502	108.91	200.111	155.665	126.832	XP_037902536.1	7165.AGAP009158-PA	0	1190	COG0515@1|root,KOG1055@1|root,KOG1055@2759|Eukaryota,KOG4258@2759|Eukaryota,39VZ2@33154|Opisthokonta,3BJE8@33208|Metazoa,3D5VC@33213|Bilateria,41TG5@6656|Arthropoda,3SJ6G@50557|Insecta,44XEX@7147|Diptera,45E69@7148|Nematocera	33208|Metazoa	T	Tyrosine kinase, catalytic domain	Vkr	-	2.7.10.1	ko:K04527	ko04010,ko04014,ko04015,ko04022,ko04066,ko04068,ko04072,ko04150,ko04151,ko04152,ko04211,ko04212,ko04213,ko04520,ko04910,ko04913,ko04923,ko04930,ko04931,ko04932,ko04960,map04010,map04014,map04015,map04022,map04066,map04068,map04072,map04150,map04151,map04152,map04211,map04212,map04213,map04520,map04910,map04913,map04923,map04930,map04931,map04932,map04960	M00676	-	-	ko00000,ko00001,ko00002,ko01000,ko01001,ko01020,ko04050,ko04090	-	-	-	ANF_receptor,Pkinase_Tyr
LOC119646222	230.121	160.496	196.043	53.6273	133.984	152.856	209.738	174.211	130.61	198.167	148.692	95.7275	226.741	158.523	205.305	197.645	247.636	295.899	66.9207	194.429	334.122	374.621	45.693	276.659	527.621	255.107	193.034	329.929	XP_037902537.1	7176.CPIJ004813-PA	1.17e-83	265	KOG0850@1|root,KOG0848@2759|Eukaryota,38E8M@33154|Opisthokonta,3BDSW@33208|Metazoa,3CSS0@33213|Bilateria,41ZXM@6656|Arthropoda,3SNFY@50557|Insecta,450UZ@7147|Diptera,45C72@7148|Nematocera	33208|Metazoa	K	Homeobox protein CDX	cad	GO:0000976,GO:0000977,GO:0001012,GO:0001067,GO:0001655,GO:0001703,GO:0002009,GO:0002225,GO:0002682,GO:0002684,GO:0002697,GO:0002699,GO:0002700,GO:0002702,GO:0002759,GO:0002760,GO:0002784,GO:0002805,GO:0002807,GO:0002831,GO:0002833,GO:0002920,GO:0002922,GO:0003002,GO:0003674,GO:0003676,GO:0003677,GO:0003690,GO:0003700,GO:0005488,GO:0005575,GO:0005622,GO:0005623,GO:0005634,GO:0005737,GO:0006355,GO:…	-	ko:K09312,ko:K22234	ko05226,map05226	-	-	-	ko00000,ko00001,ko03000	-	-	-	Homeobox
LOC119646224	65.3015	17.4648	209.156	0	0	60.5958	17.3792	93.7419	58.2879	10.2284	1.73992	81.3054	18.2327	0	2.05075	25.2802	0	0	260.166	1.5099	0	0	94.1511	0	0	1.8719	200.549	0	NA	NA	NA	NA	NA	NA	NA	NA	NA	NA	NA	NA	NA	NA	NA	NA	NA	NA	NA	NA	NA
LOC119646226	709.973	851.868	1557.12	4964.7	1982.39	2051.81	1105.99	1908.72	1089.34	925.041	3048.07	1610.57	1977.83	2634.54	937.081	1508.38	579.951	878.594	1504.63	710.829	1045.08	617.941	1113.2	1039.38	272.677	440.25	657.337	372.966	XP_037902542.1	7159.AAEL004521-PA	1.36e-39	138	2C6C8@1|root,2SD52@2759|Eukaryota,3ADR0@33154|Opisthokonta,3BWIT@33208|Metazoa,3DCGA@33213|Bilateria,421P4@6656|Arthropoda,3SPGV@50557|Insecta,453D3@7147|Diptera,45I31@7148|Nematocera	33208|Metazoa	-	-	-	-	-	-	-	-	-	-	-	-	-	-	-
LOC119646228	86.6544	224.596	202.776	112.665	291.081	403.309	696.549	1086.51	183.042	217.71	210.718	106.225	262.491	281.716	410.034	211.206	370.641	398.312	306.422	462.091	538.701	512.756	304.394	350.526	564.295	329.009	380.888	382.757	XP_037902544.1	7370.XP_005179873.1	2.78e-144	431	COG0265@1|root,KOG1320@2759|Eukaryota,39UGG@33154|Opisthokonta,3BC20@33208|Metazoa,3D0KB@33213|Bilateria,41YU2@6656|Arthropoda,3SM4Y@50557|Insecta,44YC6@7147|Diptera	33208|Metazoa	O	Catalytic activity	TYSND1	GO:0002020,GO:0003674,GO:0003824,GO:0004175,GO:0004252,GO:0005488,GO:0005515,GO:0005575,GO:0005622,GO:0005623,GO:0005737,GO:0005777,GO:0005782,GO:0005829,GO:0006508,GO:0006605,GO:0006625,GO:0006807,GO:0006810,GO:0006886,GO:0006996,GO:0007031,GO:0008104,GO:0008150,GO:0008152,GO:0008233,GO:0008234,GO:0008236,GO:0009894,GO:0009987,GO:0010467,GO:0010565,GO:0015031,GO:0015833,GO:0016043,GO:0016485,GO:…	-	-	-	-	-	-	-	-	-	-	Trypsin_2
LOC119646229	315.164	246.154	36.1809	1413.45	89.3327	714.394	658.063	92.4879	91.5918	68.2964	2929.84	97.2991	119.427	4067.13	1329.51	74.2299	18.7406	79.7041	71.2247	43.7951	92.9631	71.8706	110.302	100.993	75.5771	54.6879	59.6333	115.082	XP_037902546.1	7213.XP_004526070.1	4.28e-252	705	COG3320@1|root,KOG1221@2759|Eukaryota,38GG2@33154|Opisthokonta,3CNQM@33208|Metazoa,3E4WM@33213|Bilateria,42AHU@6656|Arthropoda,3SZZB@50557|Insecta,451ES@7147|Diptera	33208|Metazoa	I	Catalyzes the reduction of fatty acyl-CoA to fatty alcohols	-	GO:0003674,GO:0003824,GO:0005575,GO:0005622,GO:0005623,GO:0005737,GO:0005777,GO:0006139,GO:0006163,GO:0006637,GO:0006725,GO:0006732,GO:0006753,GO:0006790,GO:0006793,GO:0006796,GO:0006807,GO:0008150,GO:0008152,GO:0009058,GO:0009117,GO:0009150,GO:0009259,GO:0009987,GO:0010025,GO:0010166,GO:0016491,GO:0016620,GO:0016903,GO:0019637,GO:0019693,GO:0033865,GO:0033875,GO:0034032,GO:0034641,GO:0035336,GO:…	1.2.1.84	ko:K13356	ko00073,ko04146,ko04212,map00073,map04146,map04212	-	R09470	RC00004	ko00000,ko00001,ko01000	-	-	-	NAD_binding_4,Sterile
LOC119646231	208.234	301.056	278.22	210.885	190.564	186.419	258.886	204.951	289.059	254.169	238.336	205.43	237.732	225.155	278.671	259.591	271.803	314.057	424.909	387.07	321.368	374.714	210.547	244.201	334.093	253.233	330.058	237.709	XP_037902549.1	7222.FBpp0155777	0	946	KOG3758@1|root,KOG3758@2759|Eukaryota,38DBZ@33154|Opisthokonta,3BC45@33208|Metazoa,3CTIF@33213|Bilateria,41TCU@6656|Arthropoda,3SGV4@50557|Insecta,451Z9@7147|Diptera,45PYP@7214|Drosophilidae	33208|Metazoa	S	It is involved in the biological process described with intra-Golgi vesicle-mediated transport	COG6	GO:0000003,GO:0000139,GO:0003006,GO:0005575,GO:0005622,GO:0005623,GO:0005737,GO:0005794,GO:0005802,GO:0006810,GO:0006888,GO:0006891,GO:0007275,GO:0007548,GO:0008150,GO:0008152,GO:0008406,GO:0009653,GO:0009887,GO:0012505,GO:0016020,GO:0016192,GO:0017119,GO:0022414,GO:0030334,GO:0031090,GO:0031984,GO:0032501,GO:0032502,GO:0032588,GO:0032879,GO:0032991,GO:0035262,GO:0040012,GO:0043226,GO:0043227,GO:…	-	ko:K20293	-	-	-	-	ko00000,ko04131	-	-	-	COG6
LOC119646233	183.276	102.687	216.294	4320.62	560.601	4027.41	1192.37	883.257	190.621	354.349	5567.45	210.908	597.887	4629.17	849.648	304.299	897.284	1582.96	1345.45	1120.51	871.022	1117.63	1172.45	1168.44	308.197	352.365	645.19	269.623	XP_037902550.1	7227.FBpp0072319	1.9e-255	713	COG3320@1|root,KOG1221@2759|Eukaryota,39Z71@33154|Opisthokonta,3BCQ2@33208|Metazoa,3D528@33213|Bilateria,41V4T@6656|Arthropoda,3SIW0@50557|Insecta,44ZVG@7147|Diptera,45R58@7214|Drosophilidae	33208|Metazoa	I	Catalyzes the reduction of fatty acyl-CoA to fatty alcohols	-	GO:0003674,GO:0003824,GO:0005575,GO:0005622,GO:0005623,GO:0005737,GO:0005777,GO:0006139,GO:0006163,GO:0006637,GO:0006725,GO:0006732,GO:0006753,GO:0006790,GO:0006793,GO:0006796,GO:0006807,GO:0007275,GO:0007568,GO:0008150,GO:0008152,GO:0008340,GO:0009058,GO:0009117,GO:0009150,GO:0009259,GO:0009987,GO:0010025,GO:0010166,GO:0010259,GO:0016491,GO:0016620,GO:0016903,GO:0019637,GO:0019693,GO:0032501,GO:…	1.2.1.84	ko:K13356	ko00073,ko04146,ko04212,map00073,map04146,map04212	-	R09470	RC00004	ko00000,ko00001,ko01000	-	-	-	NAD_binding_4,Sterile
LOC119646235	13.7358	2.72217	0.669257	14.4892	10.1008	17.002	5.25077	1.03007	2.49593	11.2237	28.364	7.06244	0	25.5757	1.37707	0	4.36388	0	0	3.00358	6.54678	2.34225	0	0.90585	0.834267	1.86672	0	4.81813	NA	NA	NA	NA	NA	NA	NA	NA	NA	NA	NA	NA	NA	NA	NA	NA	NA	NA	NA	NA	NA
LOC119646236	945.01	302.719	237.029	676.008	522.148	504.241	325.65	328.048	240.219	461.916	376.882	360.886	335.225	320.039	249.306	267.27	395.353	376.681	319.436	624.803	426.564	487.807	512.19	478.602	562.745	466.014	295.226	452.769	XP_037902554.1	7370.XP_005176252.1	3.97e-166	476	KOG2922@1|root,KOG2922@2759|Eukaryota,38B71@33154|Opisthokonta,3BBGW@33208|Metazoa,3CU8Y@33213|Bilateria,41U88@6656|Arthropoda,3SIAQ@50557|Insecta,44ZQS@7147|Diptera	33208|Metazoa	U	Magnesium ion transmembrane transporter activity. It is involved in the biological process described with magnesium ion transport	NIPAL1	GO:0001558,GO:0005575,GO:0005622,GO:0005623,GO:0005737,GO:0005768,GO:0005769,GO:0005886,GO:0006355,GO:0006357,GO:0006810,GO:0006811,GO:0006812,GO:0007275,GO:0007399,GO:0007610,GO:0007626,GO:0008150,GO:0008344,GO:0008361,GO:0008582,GO:0009889,GO:0009966,GO:0009968,GO:0009987,GO:0010468,GO:0010556,GO:0010646,GO:0010648,GO:0010720,GO:0010769,GO:0010770,GO:0010975,GO:0010976,GO:0012505,GO:0015693,GO:…	-	-	-	-	-	-	-	-	-	-	Mg_trans_NIPA
LOC119646238	2238.22	830.752	845.663	2431.05	1783.27	1504.04	910.809	1377.66	829.195	1411.21	1067.46	1735.16	1116.4	1627.8	783.866	1031.45	1075.6	895.141	894.783	1043.68	1146.59	950.098	1151.85	860.821	1034.11	1045.9	774.927	693.617	XP_037902558.1	7244.FBpp0232623	1.82e-93	293	2CZN2@1|root,2S4RT@2759|Eukaryota,3A85V@33154|Opisthokonta,3BT3A@33208|Metazoa,3DA9Y@33213|Bilateria,420VV@6656|Arthropoda,3SP4B@50557|Insecta,44X0E@7147|Diptera,45SPN@7214|Drosophilidae	33208|Metazoa	-	-	-	-	-	-	-	-	-	-	-	-	-	-	-
LOC119646243	0	0	6.64451	0	81.4391	10.897	8.69296	64.259	3.32581	2.04209	0	41.4808	11.5938	0	10.9393	12.2542	156.608	950.827	421.127	174.803	154.941	311.157	470.905	236.894	91.6483	93.4503	217.114	39.9772	NA	NA	NA	NA	NA	NA	NA	NA	NA	NA	NA	NA	NA	NA	NA	NA	NA	NA	NA	NA	NA
LOC119646244	145.456	89.7714	74.1218	132.884	112.75	108.466	103.058	210.299	93.5853	95.1661	91.9009	97.4357	141.954	105.66	98.7267	78.3382	98.8371	93.1852	106.557	66.1755	110.663	84.7913	121.093	82.8896	110.52	108.101	109.244	133.778	XP_037902565.1	7213.XP_004531389.1	6.19e-50	189	2CMD8@1|root,2QQ0S@2759|Eukaryota,38BR3@33154|Opisthokonta,3BDSP@33208|Metazoa,3D1BT@33213|Bilateria,420GP@6656|Arthropoda,3SNWT@50557|Insecta,458SC@7147|Diptera	33208|Metazoa	B	PEHE	MSL1	GO:0000123,GO:0000228,GO:0000803,GO:0000805,GO:0001067,GO:0003674,GO:0003676,GO:0003677,GO:0003682,GO:0005488,GO:0005515,GO:0005575,GO:0005622,GO:0005623,GO:0005634,GO:0005654,GO:0005694,GO:0006325,GO:0006355,GO:0006464,GO:0006473,GO:0006475,GO:0006807,GO:0006996,GO:0007549,GO:0008150,GO:0008152,GO:0009047,GO:0009889,GO:0009891,GO:0009893,GO:0009987,GO:0010468,GO:0010556,GO:0010557,GO:0010604,GO:…	-	ko:K13163,ko:K14820	-	-	-	-	ko00000,ko03009,ko03036,ko03041	-	-	-	MSL1_dimer,PEHE
LOC119646246	158.857	281.711	79.4343	5.80359	31.3969	55.1007	1061.97	38.9049	204.643	62.5146	164.6	31.7404	110.827	164.054	3202.19	114.582	33.5811	11.5394	111.875	29.5247	12.9177	26.0915	44.7753	40.7219	16.693	41.755	99.8176	93.1057	XP_037902569.1	7370.XP_005181157.1	0	1262	2CN3F@1|root,2QTPZ@2759|Eukaryota,39Y1N@33154|Opisthokonta,3BDVC@33208|Metazoa,3CVGD@33213|Bilateria,41VDZ@6656|Arthropoda,3SGPX@50557|Insecta,44YWH@7147|Diptera	33208|Metazoa	S	divergent subfamily of APPLE domains	-	GO:0000003,GO:0005575,GO:0005576,GO:0005615,GO:0008150,GO:0032501,GO:0032504,GO:0044421	-	-	-	-	-	-	-	-	-	-	PAN_1
LOC119646248	452.426	100.309	96.6009	304.913	3873.99	2997.65	589.444	1386.75	164.244	722.162	738.108	1199.67	209.268	876.623	337.982	176.617	313.879	346.55	351.825	570.892	329.302	474.46	1299.11	1138.86	89.8873	236.683	115.586	36.9755	XP_037902573.1	28737.XP_006891561.1	8.6e-33	124	KOG4295@1|root,KOG4295@2759|Eukaryota,39W2M@33154|Opisthokonta,3BFPP@33208|Metazoa,3D4UK@33213|Bilateria,48BPC@7711|Chordata,4972A@7742|Vertebrata,3J494@40674|Mammalia,34TF1@311790|Afrotheria	33208|Metazoa	O	Tissue factor pathway inhibitor	TFPI2	GO:0005575,GO:0005576	-	-	-	-	-	-	-	-	-	-	Kunitz_BPTI
LOC119646251	0	0.668715	19.7547	0	171.629	30.4199	19.8837	127.44	10.868	20.5476	0	55.8727	42.3055	0	50.4532	43.5713	592.068	3059.43	2257.6	743.066	767.74	1947.76	3625.37	1470.77	549.571	844.192	1425.48	111.354	NA	NA	NA	NA	NA	NA	NA	NA	NA	NA	NA	NA	NA	NA	NA	NA	NA	NA	NA	NA	NA
LOC119646253	1742.9	691.231	608.837	889.778	768.282	684.605	492.974	517.333	499.467	520.596	580.045	590.895	497.004	658.287	407.758	442.379	411.341	420.064	617.45	425.651	510.907	453.387	863.1	421.778	508.676	586.107	525.891	537.404	XP_037902616.1	7176.CPIJ015952-PA	1.09e-105	319	KOG4223@1|root,KOG4223@2759|Eukaryota,39T0S@33154|Opisthokonta,3BAGW@33208|Metazoa,3D0YJ@33213|Bilateria,41UR6@6656|Arthropoda,3SIIF@50557|Insecta,44YW7@7147|Diptera,45CCJ@7148|Nematocera	33208|Metazoa	TU	EF-hand domain pair	RCN2	GO:0003674,GO:0005488,GO:0005509,GO:0005575,GO:0005622,GO:0005623,GO:0005634,GO:0005730,GO:0005737,GO:0005783,GO:0005788,GO:0006996,GO:0007030,GO:0008150,GO:0009987,GO:0010256,GO:0012505,GO:0016043,GO:0031974,GO:0031981,GO:0043167,GO:0043169,GO:0043226,GO:0043227,GO:0043228,GO:0043229,GO:0043231,GO:0043232,GO:0043233,GO:0044422,GO:0044424,GO:0044428,GO:0044432,GO:0044444,GO:0044446,GO:0044464,GO:…	-	-	-	-	-	-	-	-	-	-	EF-hand_5,EF-hand_7,EF-hand_8
LOC119646254	0	45.8986	76.7909	62.097	0	18.2747	64.2778	10.4574	32.294	3.03695	92.7645	33.3517	12.3784	188.852	95.2081	19.9645	0	6.38164	23.9369	8.82535	6.58488	21.4913	14.573	24.3233	9.97035	32.3363	14.4123	4.83406	XP_037902587.1	7370.XP_005179766.1	8.84e-96	318	2C8YT@1|root,2SFS6@2759|Eukaryota,3ABSX@33154|Opisthokonta,3BVIT@33208|Metazoa,3DCT0@33213|Bilateria,421J8@6656|Arthropoda,3SPUW@50557|Insecta,450RZ@7147|Diptera	33208|Metazoa	-	-	-	GO:0000775,GO:0000776,GO:0003674,GO:0005488,GO:0005515,GO:0005575,GO:0005622,GO:0005623,GO:0005694,GO:0005856,GO:0005874,GO:0007088,GO:0007346,GO:0008150,GO:0008157,GO:0010564,GO:0010965,GO:0015630,GO:0019899,GO:0019902,GO:0019903,GO:0030071,GO:0032991,GO:0033043,GO:0033044,GO:0033045,GO:0033047,GO:0043226,GO:0043228,GO:0043229,GO:0043232,GO:0044422,GO:0044424,GO:0044427,GO:0044430,GO:0044446,GO:…	-	-	-	-	-	-	-	-	-	-	-
LOC119646256	117.065	232.256	368.379	114.073	264.351	258.762	247.595	565.776	213.199	210.992	123.364	182.337	343.99	99.5408	248.033	348.883	480.342	272.376	214.215	362.999	340.08	552.85	288.228	477.938	326.106	188.88	242.384	327.465	XP_037902585.1	7227.FBpp0110096	4.25e-138	396	KOG2913@1|root,KOG2913@2759|Eukaryota,38ERJ@33154|Opisthokonta,3BBE8@33208|Metazoa,3CSP8@33213|Bilateria,41TSY@6656|Arthropoda,3SH3Z@50557|Insecta,44ZU8@7147|Diptera,45S7G@7214|Drosophilidae	33208|Metazoa	S	Repeated motif present between transmembrane helices in cystinosin, yeast ERS1p, mannose-P-dolichol utilization defect 1, and other hypothetical proteins.	PQLC1	-	-	-	-	-	-	-	-	-	-	-	PQ-loop
LOC119646257	194.365	130.01	53.2401	294.755	27.7378	64.6018	52.8032	39.7172	51.3667	27.3479	155.28	51.8111	39.6326	99.276	72.3068	39.9498	29.0791	40.8647	107.767	39.7404	53.99	63.3334	102.083	35.1197	43.9631	80.4249	75.8961	157.992	XP_037902586.1	7159.AAEL007336-PA	1.06e-101	300	KOG0897@1|root,KOG0897@2759|Eukaryota,38HWB@33154|Opisthokonta,3BC59@33208|Metazoa,3D472@33213|Bilateria,41V1M@6656|Arthropoda,3SIY8@50557|Insecta,44ZEI@7147|Diptera,45FZN@7148|Nematocera	33208|Metazoa	O	Belongs to the ubiquitin-conjugating enzyme family	UBE2QL1	GO:0003674,GO:0003824,GO:0004842,GO:0005575,GO:0005622,GO:0005623,GO:0005634,GO:0005886,GO:0006464,GO:0006807,GO:0008150,GO:0008152,GO:0009987,GO:0016020,GO:0016567,GO:0016740,GO:0019538,GO:0019787,GO:0032446,GO:0036211,GO:0043170,GO:0043226,GO:0043227,GO:0043229,GO:0043231,GO:0043412,GO:0044237,GO:0044238,GO:0044260,GO:0044267,GO:0044424,GO:0044464,GO:0061631,GO:0061650,GO:0070647,GO:0071704,GO:…	2.3.2.23	ko:K10582	ko04120,map04120	-	-	-	ko00000,ko00001,ko01000,ko04121	-	-	-	UQ_con
LOC119646258	895.166	522.576	587.259	1245.21	588.752	462.504	413.258	593.087	339.761	477.504	455.532	484.073	330.479	637.608	310.675	285.719	572.539	564.64	447.092	456.556	470.744	630.096	730.508	514.091	424.077	619.287	533.09	404.885	XP_037902589.1	7213.XP_004530265.1	2.12e-79	244	KOG4836@1|root,KOG4836@2759|Eukaryota,3A3FB@33154|Opisthokonta,3BPG8@33208|Metazoa,3D88A@33213|Bilateria,4203U@6656|Arthropoda,3SMVX@50557|Insecta,452Z9@7147|Diptera	33208|Metazoa	S	It is involved in the biological process described with protein import into mitochondrial matrix	TIMM21	GO:0005575,GO:0005622,GO:0005623,GO:0005737,GO:0005739,GO:0005740,GO:0005743,GO:0005744,GO:0006605,GO:0006626,GO:0006810,GO:0006839,GO:0006886,GO:0006996,GO:0007005,GO:0008104,GO:0008150,GO:0008535,GO:0009987,GO:0010257,GO:0015031,GO:0015833,GO:0016020,GO:0016043,GO:0017004,GO:0017038,GO:0019866,GO:0022607,GO:0030150,GO:0031090,GO:0031966,GO:0031967,GO:0031975,GO:0032981,GO:0032991,GO:0033036,GO:…	-	ko:K17796	-	-	-	-	ko00000,ko02000,ko03029	3.A.8.1	-	-	TIM21
LOC119646262	51.0818	81.667	84.8604	122.689	37.4223	19.5317	63.4749	46.8774	86.2842	35.1698	47.2419	65.594	72.6826	74.0904	69.6747	44.4437	34.2309	70.4365	59.2109	44.4098	69.0584	45.8823	57.6111	39.3299	74.3254	110.668	76.0902	65.832	XP_037902593.1	7159.AAEL005449-PA	4.39e-237	664	KOG3651@1|root,KOG3651@2759|Eukaryota,38CMW@33154|Opisthokonta,3BD4A@33208|Metazoa,3CUTZ@33213|Bilateria,41VGA@6656|Arthropoda,3SJRM@50557|Insecta,44XGM@7147|Diptera,45C9C@7148|Nematocera	33208|Metazoa	T	Arfaptin-like domain	PICK1	GO:0000003,GO:0001664,GO:0002090,GO:0002092,GO:0003674,GO:0003779,GO:0005080,GO:0005102,GO:0005484,GO:0005488,GO:0005515,GO:0005543,GO:0005575,GO:0005622,GO:0005623,GO:0005737,GO:0005739,GO:0005768,GO:0005769,GO:0005794,GO:0005829,GO:0005886,GO:0006139,GO:0006259,GO:0006304,GO:0006305,GO:0006306,GO:0006464,GO:0006468,GO:0006605,GO:0006725,GO:0006793,GO:0006796,GO:0006807,GO:0006810,GO:0006811,GO:…	-	-	-	-	-	-	-	-	-	-	Arfaptin,PDZ
LOC119646264	81.2993	320.17	175.471	75.2346	92.1703	225.343	254.863	188.348	128.531	62.4912	1140.67	73.792	117.917	470.45	401.706	62.2355	99.0039	210.875	290.184	85.1126	86.8931	161.794	180.446	150.701	106.536	117.515	197.304	126.482	XP_037902595.1	7159.AAEL012449-PA	0	1587	COG5022@1|root,KOG0160@2759|Eukaryota,38G58@33154|Opisthokonta,3BB5V@33208|Metazoa,3D5BE@33213|Bilateria,41Y4F@6656|Arthropoda,3SH5S@50557|Insecta,44ZM2@7147|Diptera,45CW8@7148|Nematocera	33208|Metazoa	Z	Belongs to the TRAFAC class myosin-kinesin ATPase superfamily. Myosin family	Myo20	GO:0001654,GO:0001736,GO:0001738,GO:0001745,GO:0002009,GO:0002165,GO:0003674,GO:0003779,GO:0005198,GO:0005488,GO:0005515,GO:0005575,GO:0005622,GO:0005623,GO:0005737,GO:0005829,GO:0005886,GO:0007163,GO:0007164,GO:0007275,GO:0007423,GO:0007444,GO:0007472,GO:0007476,GO:0007552,GO:0007560,GO:0008092,GO:0008104,GO:0008150,GO:0008586,GO:0009653,GO:0009791,GO:0009886,GO:0009887,GO:0009888,GO:0009966,GO:…	-	ko:K16677	ko04391,map04391	-	-	-	ko00000,ko00001	-	-	-	IQ,Myosin_head
LOC119646269	301.616	638.912	829.536	361.494	252.33	284.236	689.168	852.757	566.137	524.186	465.707	283.099	661.699	329.684	610.965	653.767	742.303	837.921	718.399	639.85	724.885	777.835	375.861	629.401	563.599	618.273	692.685	705.633	XP_037902605.1	7222.FBpp0155447	1.75e-222	678	KOG0998@1|root,KOG0998@2759|Eukaryota,38GSU@33154|Opisthokonta,3BCZJ@33208|Metazoa,3CRGM@33213|Bilateria,41X77@6656|Arthropoda,3SH7E@50557|Insecta,44ZXB@7147|Diptera,45NTP@7214|Drosophilidae	33208|Metazoa	TU	Calcium ion binding	Eps-15	GO:0006810,GO:0006897,GO:0006898,GO:0008150,GO:0008582,GO:0008593,GO:0009966,GO:0009968,GO:0010646,GO:0010648,GO:0016192,GO:0023051,GO:0023057,GO:0036465,GO:0040008,GO:0044087,GO:0045746,GO:0048488,GO:0048519,GO:0048523,GO:0048583,GO:0048585,GO:0048638,GO:0050789,GO:0050793,GO:0050794,GO:0050803,GO:0050807,GO:0051128,GO:0051179,GO:0051234,GO:0051239,GO:0051641,GO:0051649,GO:0051960,GO:0051963,GO:…	-	ko:K12472	ko04144,map04144	-	-	-	ko00000,ko00001,ko04131	-	-	-	EF-hand_4
LOC119646270	266.898	218.287	254.632	179.109	240.755	460.548	264.156	457.961	140.804	499.243	396.45	193.143	337.622	627.43	150.096	182.021	601.747	155.755	101.734	151.609	277.893	184.566	178.677	118.949	327.451	260.639	156.307	301.361	XP_037902606.1	7213.XP_004523795.1	1.69e-14	83.6	KOG1947@1|root,KOG1947@2759|Eukaryota,3A4Z0@33154|Opisthokonta,3BRND@33208|Metazoa,3D8FH@33213|Bilateria,41ZWJ@6656|Arthropoda,3SN1D@50557|Insecta,4544I@7147|Diptera	33208|Metazoa	S	nucleic acid binding	-	-	-	-	-	-	-	-	-	-	-	-	F-box,LRR_6,RRM_1
LOC119646271	245.04	321.172	135.909	50.4097	444.03	166.596	648.166	135.928	264.148	157.032	297.208	94.4577	307.639	691.177	670.538	106.472	10.224	47.0248	50.6566	5.17303	57.4751	42.7364	0	99.5713	6.81956	9.85245	51.592	34.3767	XP_037902607.1	7159.AAEL000234-PA	1.35e-136	412	KOG3776@1|root,KOG3776@2759|Eukaryota,39TD7@33154|Opisthokonta,3BMAI@33208|Metazoa,3D4T4@33213|Bilateria,41X0D@6656|Arthropoda,3SH41@50557|Insecta,452V0@7147|Diptera,45C27@7148|Nematocera	33208|Metazoa	T	Class B Scavenger Receptor (CD36 domain)	SCRB7	-	-	ko:K13885	ko04145,ko04913,ko04925,ko04927,ko04934,ko04975,ko04976,ko04977,ko04979,ko05160,map04145,map04913,map04925,map04927,map04934,map04975,map04976,map04977,map04979,map05160	-	-	-	ko00000,ko00001,ko04131,ko04147	9.B.39.1.3	-	-	CD36
LOC119646273	113.246	175.988	103.084	53.4431	26.0034	59.7103	90.7131	46.0231	113.466	59.7381	110.331	102.708	99.0461	208.101	472.673	124.419	58.1396	66.3821	304.065	98.5656	50.0559	80.3202	309.721	81.0934	63.989	69.305	147.945	120.071	XP_037902610.1	7370.XP_005176261.1	1.29e-276	767	COG0531@1|root,KOG1287@2759|Eukaryota,38BBK@33154|Opisthokonta,3B9U2@33208|Metazoa,3CR7T@33213|Bilateria,41X9Y@6656|Arthropoda,3SI4M@50557|Insecta,44XEY@7147|Diptera	33208|Metazoa	E	amino acid transmembrane transporter activity. It is involved in the biological process described with amino acid transmembrane transport	SLC7A6	GO:0000820,GO:0000821,GO:0002376,GO:0003333,GO:0003674,GO:0005215,GO:0005342,GO:0005575,GO:0005622,GO:0005623,GO:0005886,GO:0005887,GO:0006082,GO:0006520,GO:0006521,GO:0006807,GO:0006810,GO:0006811,GO:0006812,GO:0006820,GO:0006865,GO:0006928,GO:0006950,GO:0006952,GO:0008150,GO:0008152,GO:0008509,GO:0008514,GO:0009605,GO:0009607,GO:0009620,GO:0009987,GO:0010565,GO:0015075,GO:0015171,GO:0015174,GO:…	-	ko:K13780,ko:K13867,ko:K13872	ko04150,ko04974,ko05230,map04150,map04974,map05230	-	-	-	ko00000,ko00001,ko02000	2.A.3.8,2.A.3.8.1,2.A.3.8.7	-	-	AA_permease_2
LOC119646274	375.664	330.622	371.215	456.498	314.683	320.05	210.976	273.896	474.898	499.897	248.142	992.821	357.759	353.953	277.3	869.374	313.882	224.866	267.727	232.126	252.409	335.36	321.108	257.093	355.108	294.457	249.122	292.165	XP_037902611.1	7159.AAEL010505-PA	3.36e-129	370	COG0036@1|root,KOG3111@2759|Eukaryota,38G6J@33154|Opisthokonta,3BBFI@33208|Metazoa,3CTKR@33213|Bilateria,41VPK@6656|Arthropoda,3SHK2@50557|Insecta,450NT@7147|Diptera,45F34@7148|Nematocera	33208|Metazoa	G	Belongs to the ribulose-phosphate 3-epimerase family	RPE	GO:0003674,GO:0003824,GO:0004750,GO:0005488,GO:0005515,GO:0005575,GO:0005622,GO:0005623,GO:0005737,GO:0005829,GO:0005975,GO:0005996,GO:0006081,GO:0006098,GO:0006139,GO:0006725,GO:0006732,GO:0006733,GO:0006739,GO:0006753,GO:0006793,GO:0006796,GO:0006807,GO:0008150,GO:0008152,GO:0009052,GO:0009056,GO:0009117,GO:0009987,GO:0016052,GO:0016853,GO:0016854,GO:0016857,GO:0019321,GO:0019323,GO:0019362,GO:…	5.1.3.1	ko:K01783	ko00030,ko00040,ko00710,ko01100,ko01110,ko01120,ko01130,ko01200,ko01230,map00030,map00040,map00710,map01100,map01110,map01120,map01130,map01200,map01230	M00004,M00007	R01529	RC00540	ko00000,ko00001,ko00002,ko01000	-	-	-	Ribul_P_3_epim
LOC119646275	1952.16	539.088	309.928	988.109	659.555	647.278	396.358	296.608	349.789	700.792	529.569	749.516	290.865	1046.79	442.131	353.26	446.114	353.955	383.572	369.887	281.26	463.674	852.267	504.349	437.489	551.121	389.704	468.355	XP_037902612.1	7370.XP_005179026.1	2.67e-92	273	KOG4357@1|root,KOG4357@2759|Eukaryota,38FUM@33154|Opisthokonta,3BKBY@33208|Metazoa,3D306@33213|Bilateria,41YRN@6656|Arthropoda,3SM5X@50557|Insecta,452XD@7147|Diptera	33208|Metazoa	S	Chaperone for wingless signalling and trafficking of LDL receptor	MESDC2	GO:0003674,GO:0005102,GO:0005488,GO:0005515,GO:0005575,GO:0005622,GO:0005623,GO:0005737,GO:0005783,GO:0005788,GO:0005886,GO:0006457,GO:0006605,GO:0006612,GO:0006810,GO:0006886,GO:0006888,GO:0006897,GO:0006909,GO:0007498,GO:0008104,GO:0008150,GO:0009888,GO:0009987,GO:0012505,GO:0015031,GO:0015833,GO:0016020,GO:0016192,GO:0031974,GO:0032502,GO:0032879,GO:0032880,GO:0033036,GO:0034394,GO:0034613,GO:…	-	-	-	-	-	-	-	-	-	-	Mesd
LOC119646276	11.181	109.166	136.755	80.8875	140.337	149.869	220.146	147.445	416.607	217.711	293.508	265.125	322.75	155.797	280.765	374.026	143.896	150.644	226.224	145.695	276.593	139.231	143.999	211.758	128.816	301.286	213.966	186.14	XP_037902613.1	7370.XP_005176519.1	3.95e-241	689	COG2940@1|root,KOG2084@2759|Eukaryota,38DMQ@33154|Opisthokonta,3BEFP@33208|Metazoa,3D2H3@33213|Bilateria,41WDG@6656|Arthropoda,3SJ66@50557|Insecta,44YN5@7147|Diptera	33208|Metazoa	B	MYND finger	-	GO:0001654,GO:0001745,GO:0001751,GO:0001754,GO:0003674,GO:0005488,GO:0005515,GO:0005575,GO:0005622,GO:0005623,GO:0005737,GO:0007275,GO:0007399,GO:0007423,GO:0008150,GO:0009653,GO:0009887,GO:0009892,GO:0009987,GO:0010468,GO:0010605,GO:0010629,GO:0019222,GO:0019899,GO:0022008,GO:0030154,GO:0030182,GO:0032501,GO:0032502,GO:0042051,GO:0042461,GO:0042462,GO:0042826,GO:0044424,GO:0044464,GO:0046530,GO:…	-	-	-	-	-	-	-	-	-	-	SET,zf-MYND
LOC119646281	384.911	169.204	116.278	365.492	166.436	137.458	144.976	126.899	112.739	120.708	186.217	151.149	102.477	206.773	124.002	122.101	142.408	129.07	163.67	108.077	148.48	152.056	140.641	106.48	222.925	146.387	101.808	217.249	XP_037902617.1	7213.XP_004521883.1	1.08e-47	160	KOG4496@1|root,KOG4496@2759|Eukaryota,38G72@33154|Opisthokonta,3BIJF@33208|Metazoa,3CVF7@33213|Bilateria,420AP@6656|Arthropoda,3SP3T@50557|Insecta,453PV@7147|Diptera	33208|Metazoa	S	Subunit CCDC53 of WASH complex	CCDC53	GO:0003674,GO:0005488,GO:0005515,GO:0005575,GO:0005622,GO:0005623,GO:0005737,GO:0007275,GO:0007568,GO:0008104,GO:0008150,GO:0008340,GO:0010259,GO:0030155,GO:0032501,GO:0032502,GO:0032991,GO:0033036,GO:0044424,GO:0044444,GO:0044464,GO:0045185,GO:0045785,GO:0048518,GO:0048856,GO:0050789,GO:0051098,GO:0051101,GO:0051179,GO:0051220,GO:0051235,GO:0065007,GO:0065008,GO:0065009,GO:0071203,GO:2000677	-	ko:K17410,ko:K18463	ko04144,ko04212,map04144,map04212	-	-	-	br01610,ko00000,ko00001,ko03011,ko04131	-	-	-	CCDC53
LOC119646282	102742	11627.4	7560.8	74297.4	84879.5	65399.4	12744.7	14933	17489.5	32319.5	35029.8	43440.1	16473.1	58417.5	11878.6	12076.6	10505.2	8214.07	9093.75	9653.05	13490.8	11944.1	45801.5	11765.8	13661.8	16884.4	8645.04	9162.27	XP_037902618.1	7213.XP_004521884.1	4.96e-55	173	COG1631@1|root,KOG3464@2759|Eukaryota,3A3DQ@33154|Opisthokonta,3BRG4@33208|Metazoa,3D8JT@33213|Bilateria,41ZR2@6656|Arthropoda,3SN0Q@50557|Insecta,453NJ@7147|Diptera	33208|Metazoa	J	Belongs to the eukaryotic ribosomal protein eL42 family	RPL36A	GO:0000184,GO:0000956,GO:0002181,GO:0003674,GO:0003735,GO:0005198,GO:0005575,GO:0005622,GO:0005623,GO:0005634,GO:0005737,GO:0005783,GO:0005789,GO:0005791,GO:0005829,GO:0005840,GO:0005844,GO:0005886,GO:0006139,GO:0006401,GO:0006402,GO:0006412,GO:0006413,GO:0006518,GO:0006605,GO:0006612,GO:0006613,GO:0006614,GO:0006725,GO:0006807,GO:0006810,GO:0006886,GO:0007275,GO:0008104,GO:0008150,GO:0008152,GO:…	-	ko:K02929	ko03010,map03010	M00177,M00179	-	-	br01610,ko00000,ko00001,ko00002,ko03011	-	-	-	Ribosomal_L44
LOC119646283	78.1502	78.4791	106.101	14.825	213.62	73.1713	46.2271	154.447	83.2203	44.8137	45.3702	59.3899	77.8591	43.7356	106.558	45.1546	12.4659	29.1941	157.461	30.8243	32.6436	9.02621	110.965	32.6251	38.0093	54.5852	112	55.2962	XP_037902624.1	7070.TC000393-PA	1.03e-280	778	KOG0255@1|root,KOG0255@2759|Eukaryota,39SVS@33154|Opisthokonta,3BMZV@33208|Metazoa,3D3N7@33213|Bilateria,41Y88@6656|Arthropoda,3SHRM@50557|Insecta	33208|Metazoa	S	synaptic vesicle	-	-	-	ko:K06258	ko04512,map04512	-	-	-	ko00000,ko00001,ko02000	2.A.1.22	-	-	MFS_1,Sugar_tr
LOC119646284	0	1.40617	0	0	8.756	1.2329	4.40985	0	3.35335	3.07534	1.63731	1.77728	1.67119	2.15966	2.81217	0	0	7.75358	20.371	4.47224	7.99621	1.14728	9.23474	4.40765	28.6023	8.13812	7.89412	14.349	NA	NA	NA	NA	NA	NA	NA	NA	NA	NA	NA	NA	NA	NA	NA	NA	NA	NA	NA	NA	NA
LOC119646286	132.784	257.988	107.79	131.442	67.5782	185.208	304.692	78.4327	148.255	62.7805	434.787	113.247	89.9723	579.446	470.511	111.363	130.814	67.6614	191.517	92.7075	88.2484	199.198	114.823	130.658	111.362	204.24	132.778	257.859	XP_037902625.1	7217.FBpp0118076	1.74e-246	699	KOG3736@1|root,KOG3736@2759|Eukaryota,38FDW@33154|Opisthokonta,3BICI@33208|Metazoa,3CTEU@33213|Bilateria,41XES@6656|Arthropoda,3SG00@50557|Insecta,450KY@7147|Diptera,45N8W@7214|Drosophilidae	33208|Metazoa	O	Ricin-type beta-trefoil	-	GO:0003674,GO:0003824,GO:0004653,GO:0005575,GO:0005622,GO:0005623,GO:0005737,GO:0005794,GO:0005795,GO:0005975,GO:0007275,GO:0007424,GO:0008150,GO:0008152,GO:0008194,GO:0008376,GO:0009058,GO:0009311,GO:0009312,GO:0012505,GO:0016051,GO:0016740,GO:0016757,GO:0016758,GO:0031984,GO:0032501,GO:0032502,GO:0043226,GO:0043227,GO:0043229,GO:0043231,GO:0044238,GO:0044422,GO:0044424,GO:0044431,GO:0044444,GO:…	2.4.1.41	ko:K00710	ko00512,ko01100,map00512,map01100	M00056	R05907	-	ko00000,ko00001,ko00002,ko01000,ko01003	-	GT27	-	Glycos_transf_2,Ricin_B_lectin
LOC119646287	978.95	279.804	304.12	1065.36	333.943	390.918	202.337	166.385	421.628	412.834	499.801	623.154	220.148	744.215	179.346	370.077	117.686	108.742	127.435	93.9795	119.227	135.536	297.36	109.356	206.49	160.816	136.981	101.997	XP_037902626.1	7159.AAEL008044-PA	3.76e-23	92	2E4YM@1|root,2SBTE@2759|Eukaryota,3ADYP@33154|Opisthokonta,3BVFK@33208|Metazoa,3DCJ4@33213|Bilateria,421M6@6656|Arthropoda,3SPZ6@50557|Insecta,454MS@7147|Diptera,45JEE@7148|Nematocera	33208|Metazoa	J	Ribosomal protein L34	-	GO:0000313,GO:0000315,GO:0003674,GO:0003735,GO:0005198,GO:0005575,GO:0005622,GO:0005623,GO:0005737,GO:0005739,GO:0005759,GO:0005761,GO:0005762,GO:0005840,GO:0006412,GO:0006518,GO:0006807,GO:0008150,GO:0008152,GO:0009058,GO:0009059,GO:0009987,GO:0010467,GO:0015934,GO:0019538,GO:0031974,GO:0032543,GO:0032991,GO:0034641,GO:0034645,GO:0043043,GO:0043170,GO:0043226,GO:0043227,GO:0043228,GO:0043229,GO:…	-	ko:K02914	ko03010,map03010	M00178	-	-	br01610,ko00000,ko00001,ko00002,ko03011	-	-	-	Ribosomal_L34
LOC119646290	29.4337	55.7946	16.878	380.791	17.3872	605.032	146.919	80.4725	64.5076	65.709	1055.09	20.1604	72.522	944.376	115.314	32.9794	36.287	38.2405	62.3776	44.1797	26.3986	3.39564	30.9963	27.9782	24.0638	20.3603	22.0382	19.3159	XP_037902629.1	7213.XP_004533832.1	0	1026	KOG2579@1|root,KOG2579@2759|Eukaryota,39PX8@33154|Opisthokonta,3BKKW@33208|Metazoa,3DBS6@33213|Bilateria,41Y0B@6656|Arthropoda,3SHZH@50557|Insecta,44ZBU@7147|Diptera	33208|Metazoa	S	Fibrinogen-related domains (FReDs)	ANGPT4	GO:0001666,GO:0001932,GO:0001934,GO:0002376,GO:0003674,GO:0005102,GO:0005488,GO:0005515,GO:0005575,GO:0005576,GO:0005615,GO:0006928,GO:0006950,GO:0007154,GO:0007165,GO:0007166,GO:0007167,GO:0007169,GO:0007171,GO:0008047,GO:0008150,GO:0009628,GO:0009893,GO:0009966,GO:0009967,GO:0009987,GO:0010469,GO:0010562,GO:0010594,GO:0010595,GO:0010596,GO:0010604,GO:0010632,GO:0010633,GO:0010634,GO:0010646,GO:…	-	ko:K05466,ko:K05467,ko:K09624	ko04010,ko04014,ko04015,ko04066,ko04151,ko05167,map04010,map04014,map04015,map04066,map04151,map05167	-	-	-	ko00000,ko00001,ko01000,ko01002,ko04052	-	-	-	Fibrinogen_C
LOC119646292	192.771	283.073	191.045	115.854	89.1684	89.3789	106.388	179.706	212.335	170.279	121.956	141.427	340.803	118.974	235.919	170.938	193.297	103.605	84.2936	144.367	222.812	229.789	61.4345	120.966	287.654	103.901	91.2466	185.827	XP_037902634.1	7165.AGAP009284-PA	7.71e-257	741	COG1055@1|root,KOG2639@2759|Eukaryota,38FH6@33154|Opisthokonta,3B9J7@33208|Metazoa,3CUUX@33213|Bilateria,41V8N@6656|Arthropoda,3SGD4@50557|Insecta,44X55@7147|Diptera,45DZJ@7148|Nematocera	33208|Metazoa	P	Citrate transporter	OCA2	GO:0000003,GO:0000323,GO:0003006,GO:0003333,GO:0003674,GO:0005215,GO:0005302,GO:0005342,GO:0005575,GO:0005622,GO:0005623,GO:0005737,GO:0005764,GO:0005765,GO:0005768,GO:0005773,GO:0005774,GO:0005783,GO:0005789,GO:0006582,GO:0006725,GO:0006726,GO:0006810,GO:0006811,GO:0006812,GO:0006820,GO:0006855,GO:0006865,GO:0007276,GO:0007281,GO:0007283,GO:0007286,GO:0008150,GO:0008152,GO:0008283,GO:0008324,GO:…	-	-	-	-	-	-	-	-	-	-	CitMHS,Na_sulph_symp
LOC119646293	82.5644	165.734	123.336	27.4431	95.4929	70.6979	122.465	58.6153	147.41	127.542	88.4968	62.3182	160.091	93.932	325.49	168.197	280.522	298.678	510.145	267.485	304.381	339.962	176.493	209.903	285	357.487	327.694	319.968	XP_037902636.1	7213.XP_004520720.1	2.38e-257	752	KOG3755@1|root,KOG3755@2759|Eukaryota,39U9H@33154|Opisthokonta,3BNWW@33208|Metazoa,3D3B9@33213|Bilateria,41WXR@6656|Arthropoda,3SIJD@50557|Insecta,451SJ@7147|Diptera	33208|Metazoa	K	DNA- binding	dve-1	GO:0000003,GO:0000041,GO:0000122,GO:0002009,GO:0002165,GO:0003002,GO:0003006,GO:0003674,GO:0003676,GO:0003677,GO:0003700,GO:0005488,GO:0005515,GO:0005575,GO:0005622,GO:0005623,GO:0005634,GO:0005667,GO:0005737,GO:0005829,GO:0006355,GO:0006357,GO:0006810,GO:0006811,GO:0006812,GO:0006825,GO:0006950,GO:0006986,GO:0007275,GO:0007389,GO:0007444,GO:0007472,GO:0007476,GO:0007478,GO:0007480,GO:0007494,GO:…	-	ko:K19774	ko04212,map04212	-	-	-	ko00000,ko00001	-	-	-	Homeobox,ULD
LOC119646294	0	19.4845	34.3611	0	0	0	16.734	0	16.5609	4.04882	5.01126	0	7.42644	0	0	0	0	0	0	7.35077	3.95175	0	0	3.60322	0	12.9325	8.34343	0	XP_037902637.1	244447.XP_008330351.1	7e-227	690	COG2801@1|root,KOG0017@2759|Eukaryota,38F42@33154|Opisthokonta,3BA5H@33208|Metazoa,3CZSS@33213|Bilateria,48AQP@7711|Chordata,48YUZ@7742|Vertebrata,4A5WT@7898|Actinopterygii	33208|Metazoa	L	K02A2.6-like	-	-	-	-	-	-	-	-	-	-	-	-	RVP,RVT_1,rve
LOC119646296	3716.43	2937.1	4833.61	563.318	14532.5	4578.3	10502.8	759.424	6183.43	6905.18	1321.35	17988.7	7696.58	4469.44	7433.81	6142.63	465.117	717.429	69436.5	166.224	1506.98	514.661	27698.9	299.14	831.016	2602.1	43425.4	552.817	XP_037902642.1	7159.AAEL000389-PA	7.75e-260	747	COG3325@1|root,KOG2806@2759|Eukaryota,38BJK@33154|Opisthokonta,3BA7Q@33208|Metazoa,3CS5K@33213|Bilateria,41U3S@6656|Arthropoda,3SI40@50557|Insecta,458BZ@7147|Diptera,45MJB@7148|Nematocera	33208|Metazoa	G	Glyco_18	-	-	3.2.1.14	ko:K01183	ko00520,ko01100,map00520,map01100	-	R01206,R02334	RC00467	ko00000,ko00001,ko01000	-	GH18	-	CBM_14,Glyco_hydro_18,LysM,Self-incomp_S1
LOC119646297	247.554	385.529	359.154	128.551	208.152	283.961	348.813	319.11	405.813	248.039	304.945	249.295	348.284	219.858	442.184	411.659	398.255	368.911	437.003	326.467	285.88	300.728	345.982	435.17	329.067	455.502	387.663	339.281	XP_037902639.1	7370.XP_005187713.1	2.15e-261	738	KOG0574@1|root,KOG0574@2759|Eukaryota,3AJ3H@33154|Opisthokonta,3BA3K@33208|Metazoa,3CV9N@33213|Bilateria,41VZQ@6656|Arthropoda,3SIZF@50557|Insecta,44Y1T@7147|Diptera	33208|Metazoa	T	It is involved in the biological process described with protein phosphorylation	-	GO:0000003,GO:0001654,GO:0001667,GO:0001708,GO:0001745,GO:0001751,GO:0001752,GO:0001754,GO:0001932,GO:0001934,GO:0002009,GO:0002011,GO:0002064,GO:0002065,GO:0002066,GO:0003006,GO:0003674,GO:0003824,GO:0004672,GO:0004674,GO:0005488,GO:0005515,GO:0005575,GO:0005622,GO:0005623,GO:0005737,GO:0005829,GO:0005911,GO:0005938,GO:0006464,GO:0006468,GO:0006508,GO:0006793,GO:0006796,GO:0006807,GO:0006915,GO:…	-	ko:K04412	ko04010,ko04214,ko04390,ko04391,ko04392,map04010,map04214,map04390,map04391,map04392	M00683	-	-	ko00000,ko00001,ko00002,ko01001	-	-	-	Mst1_SARAH,Pkinase
LOC119646298	48.0677	127.224	81.567	60.4173	64.0409	58.6072	87.9804	60.1571	96.5363	46.3927	155.774	50.5073	63.0835	86.3041	84.8437	93.8205	96.5932	59.4467	101.546	82.1601	38.3695	54.9622	74.3648	72.9035	35.6499	74.3976	116.784	65.8083	XP_037902643.1	7370.XP_005179840.1	2.54e-263	768	KOG1704@1|root,KOG1704@2759|Eukaryota,38HNJ@33154|Opisthokonta,3BAH0@33208|Metazoa,3CRZ2@33213|Bilateria,41V7Z@6656|Arthropoda,3SK7R@50557|Insecta,44YK8@7147|Diptera	33208|Metazoa	TZ	Zinc ion binding	PRICKLE2	GO:0000226,GO:0001558,GO:0001568,GO:0001654,GO:0001701,GO:0001736,GO:0001737,GO:0001738,GO:0001745,GO:0001824,GO:0001825,GO:0001829,GO:0001830,GO:0001838,GO:0001841,GO:0001843,GO:0001944,GO:0002009,GO:0002165,GO:0003002,GO:0003674,GO:0005488,GO:0005515,GO:0005575,GO:0005622,GO:0005623,GO:0005634,GO:0005635,GO:0005737,GO:0005813,GO:0005815,GO:0005829,GO:0005856,GO:0005886,GO:0006355,GO:0006606,GO:…	-	ko:K04511	ko04310,map04310	-	-	-	ko00000,ko00001	-	-	-	LIM,PET
LOC119646300	529.978	885.696	586.199	420.321	428.319	454.555	635.039	586.875	678.298	483.955	509.748	463.491	644.599	496.261	711.172	712.723	571.221	570.615	538.735	453.021	612.563	598.251	499.069	527.088	598.321	511.898	638.795	732.535	XP_037902644.1	7370.XP_005179507.1	2.84e-219	635	KOG1363@1|root,KOG1363@2759|Eukaryota,39RQQ@33154|Opisthokonta,3BA6D@33208|Metazoa,3CXI3@33213|Bilateria,41TWB@6656|Arthropoda,3SG36@50557|Insecta,44YEF@7147|Diptera	33208|Metazoa	T	UAS	FAF1	GO:0001932,GO:0002682,GO:0002683,GO:0002697,GO:0002698,GO:0002700,GO:0002701,GO:0002759,GO:0002784,GO:0002785,GO:0002786,GO:0002787,GO:0002805,GO:0002806,GO:0002808,GO:0002809,GO:0002813,GO:0002814,GO:0002831,GO:0002832,GO:0002920,GO:0002921,GO:0003674,GO:0005488,GO:0005515,GO:0005575,GO:0005622,GO:0005623,GO:0005634,GO:0005635,GO:0005737,GO:0005783,GO:0005789,GO:0005829,GO:0005886,GO:0006275,GO:…	-	ko:K20703	ko04217,ko04624,map04217,map04624	-	-	-	ko00000,ko00001	-	-	-	UBA_4,UBX
LOC119646301	483.552	330.26	232.412	56.3324	492.006	395.989	317.885	368.077	138.317	216.702	170.597	112.372	198.11	234.759	260.603	122.883	234.013	385.55	476.377	214.874	273.954	172.072	789.318	267.629	263.452	521.253	404.415	322.318	NA	NA	NA	NA	NA	NA	NA	NA	NA	NA	NA	NA	NA	NA	NA	NA	NA	NA	NA	NA	NA
LOC119646303	240.122	190.964	156.231	241.224	134.888	207.064	121.465	145.233	170.636	124.591	222.744	194.927	115.592	244.304	119.454	158.98	146.804	149.393	108.877	119.345	156.677	81.6611	130.535	85.6234	162.919	182.143	130.534	143.407	XP_037902646.1	7213.XP_004522539.1	5.25e-205	567	KOG0662@1|root,KOG0662@2759|Eukaryota,3AJNJ@33154|Opisthokonta,3BASC@33208|Metazoa,3CR6Q@33213|Bilateria,41VZC@6656|Arthropoda,3SK54@50557|Insecta,4528P@7147|Diptera	33208|Metazoa	TU	It is involved in the biological process described with protein phosphorylation	CDK5	GO:0000226,GO:0000902,GO:0000904,GO:0001505,GO:0001558,GO:0001764,GO:0001932,GO:0001934,GO:0001963,GO:0002039,GO:0002252,GO:0002376,GO:0003008,GO:0003674,GO:0003824,GO:0004672,GO:0004674,GO:0004693,GO:0005102,GO:0005176,GO:0005488,GO:0005515,GO:0005575,GO:0005622,GO:0005623,GO:0005634,GO:0005654,GO:0005737,GO:0005829,GO:0005856,GO:0005886,GO:0006325,GO:0006355,GO:0006464,GO:0006468,GO:0006582,GO:…	2.7.11.22	ko:K02090	ko04360,ko05010,ko05030,map04360,map05010,map05030	-	-	-	ko00000,ko00001,ko01000,ko01001,ko04131	-	-	-	Pkinase
LOC119646304	2.35466	49.3419	55.2868	23.0963	25.6075	25.1794	38.0805	42.982	56.3232	20.631	47.2661	26.3876	47.0269	18.8416	63.9465	62.9645	36.8683	36.5916	85.384	50.6529	74.5622	36.1422	25.0001	50.991	13.7775	50.5704	59.9552	45.7166	XP_037902648.1	7213.XP_004520576.1	0	993	COG0194@1|root,KOG0609@2759|Eukaryota,38CU2@33154|Opisthokonta,3BA43@33208|Metazoa,3CXF3@33213|Bilateria,41XW0@6656|Arthropoda,3SK9T@50557|Insecta,44WPR@7147|Diptera	33208|Metazoa	T	Belongs to the MAGUK family	MPP7	GO:0003674,GO:0005198,GO:0005488,GO:0005515,GO:0005575,GO:0005622,GO:0005623,GO:0005634,GO:0005654,GO:0005737,GO:0005886,GO:0005911,GO:0005912,GO:0005923,GO:0007043,GO:0007163,GO:0008104,GO:0008150,GO:0008582,GO:0009966,GO:0009967,GO:0009987,GO:0010646,GO:0010647,GO:0016020,GO:0016043,GO:0019904,GO:0022607,GO:0023051,GO:0023056,GO:0030010,GO:0030054,GO:0030424,GO:0031334,GO:0031974,GO:0031981,GO:…	-	-	-	-	-	-	-	-	-	-	Guanylate_kin,L27,PDZ,SH3_1,SH3_2
LOC119646307	431.289	788.602	909.372	937.822	1879.45	1940.84	1892.09	2453.23	1859.06	1652.72	1476.5	1494.06	1674.54	1368.35	1746.44	1223.48	2455.5	2180.61	2989.26	2473.09	2507.03	2221.13	2594.33	3004.91	2272.76	4830.48	2816.63	2647.71	NA	NA	NA	NA	NA	NA	NA	NA	NA	NA	NA	NA	NA	NA	NA	NA	NA	NA	NA	NA	NA
LOC119646308	421.844	827.585	1234.6	30.3332	1431.48	871.037	1119.85	2361.27	374.386	842.628	51.8814	1107.13	425.985	19.2054	832.98	848.661	1954.96	1288.24	1043.52	2948.01	1322.13	1700.74	651.249	2164.68	1709.66	1068.59	1280.91	1011.19	XP_037902653.1	7227.FBpp0085807	2.31e-199	568	COG0596@1|root,KOG2565@2759|Eukaryota,38FY7@33154|Opisthokonta,3BB6M@33208|Metazoa,3CZY0@33213|Bilateria,41UUK@6656|Arthropoda,3SIFQ@50557|Insecta,44Z2E@7147|Diptera,45Q2T@7214|Drosophilidae	33208|Metazoa	S	Catalyzes juvenile hormone hydrolysis	EPHX1	GO:0001889,GO:0003674,GO:0003824,GO:0004301,GO:0005488,GO:0005515,GO:0005575,GO:0005622,GO:0005623,GO:0005737,GO:0005783,GO:0005789,GO:0005886,GO:0006066,GO:0006629,GO:0006714,GO:0006716,GO:0006719,GO:0006720,GO:0006721,GO:0006725,GO:0006805,GO:0007275,GO:0008096,GO:0008150,GO:0008152,GO:0008300,GO:0009056,GO:0009058,GO:0009410,GO:0009719,GO:0009725,GO:0009987,GO:0010033,GO:0010817,GO:0012505,GO:…	1.11.1.12,3.3.2.9	ko:K01253,ko:K05361,ko:K10719	ko00480,ko00980,ko00981,ko04216,ko04976,ko05204,map00480,map00980,map00981,map04216,map04976,map05204	-	R03167,R07013,R07014,R07027,R07071,R07072,R07082,R08152,R08153,R09410,R09417,R09443	RC00011,RC01447,RC01728,RC01764,RC02031,RC02528	ko00000,ko00001,ko01000,ko01002	-	-	-	Abhydrolase_1,EHN
LOC119646309	894.926	482.651	310.448	537.337	598.408	511.579	330.076	368.844	353.695	317.044	305.622	466.241	294.755	439.539	321.564	258.054	248.549	242.601	319.458	268.141	314.677	275.577	571.384	255.065	341.627	474.301	334.678	328.711	XP_037902654.1	7213.XP_004533520.1	5.64e-279	766	COG5277@1|root,KOG0679@2759|Eukaryota,38BYA@33154|Opisthokonta,3BA27@33208|Metazoa,3CY3R@33213|Bilateria,41U57@6656|Arthropoda,3SFZJ@50557|Insecta,44WQI@7147|Diptera	33208|Metazoa	Z	Belongs to the actin family	ACTL6A	GO:0000123,GO:0000228,GO:0000278,GO:0000281,GO:0000785,GO:0000790,GO:0000902,GO:0000904,GO:0000910,GO:0001654,GO:0003407,GO:0003674,GO:0003682,GO:0003712,GO:0003713,GO:0005198,GO:0005200,GO:0005488,GO:0005575,GO:0005622,GO:0005623,GO:0005634,GO:0005654,GO:0005694,GO:0005730,GO:0005886,GO:0006325,GO:0006333,GO:0006338,GO:0006355,GO:0006357,GO:0006464,GO:0006473,GO:0006475,GO:0006508,GO:0006807,GO:…	-	ko:K11340,ko:K11652	ko04714,ko05225,map04714,map05225	-	-	-	ko00000,ko00001,ko03021,ko03036,ko04147	-	-	-	Actin
LOC119646311	88.3565	33.4946	28.8158	63.3877	86.9578	53.7801	6.18377	41.4867	40.4887	41.6353	41.0714	72.9979	61.6151	66.3654	47.1765	25.8896	11.6627	1.28037	119.93	1.4753	2.64252	6.8062	188.177	5.42224	1.64781	0	49.4082	2.42482	XP_037902658.1	7176.CPIJ005482-PA	9.91e-86	259	2ABV9@1|root,2RYQ1@2759|Eukaryota,3A00B@33154|Opisthokonta,3BPY7@33208|Metazoa,3D6RG@33213|Bilateria,41YNW@6656|Arthropoda,3SM6W@50557|Insecta,454JW@7147|Diptera,45E8C@7148|Nematocera	33208|Metazoa	-	-	-	-	-	-	-	-	-	-	-	-	-	-	-
LOC119646313	182601	20870.8	35788.3	46744.8	63323.8	26501.6	35143.1	36758.5	11242.3	61169.7	8566.75	33507.5	3961.71	23010.6	7742.01	5941.32	49449.3	75885.1	85595.9	107659	98085.3	70004.6	98153.5	29971.5	36877.1	1121.29	139658	112016	XP_037902659.1	7370.XP_005178936.1	2.05e-72	230	COG5640@1|root,KOG3627@2759|Eukaryota,3A0SR@33154|Opisthokonta,3BQSN@33208|Metazoa,3D7GV@33213|Bilateria,41Z8W@6656|Arthropoda,3SM0S@50557|Insecta,44WVM@7147|Diptera	33208|Metazoa	O	activity. It is involved in the biological process described with proteolysis	-	GO:0003674,GO:0003824,GO:0004175,GO:0004252,GO:0005575,GO:0005622,GO:0005623,GO:0005737,GO:0006508,GO:0006807,GO:0008150,GO:0008152,GO:0008233,GO:0008236,GO:0016787,GO:0017171,GO:0019538,GO:0043170,GO:0044238,GO:0044424,GO:0044464,GO:0070011,GO:0071704,GO:0140096,GO:1901564	-	ko:K09640	-	-	-	-	ko00000,ko01000,ko01002	-	-	-	Trypsin
LOC119646314	0	8.98271	9.8829	0	154.333	0	16.742	0	12.4902	11.2132	0	4.41406	10.7934	5.34818	55.4606	0	0	6.41835	0	22.3606	0	0	0	22.6629	0	0	6.10611	4.84387	XP_037902660.1	7222.FBpp0152787	9.67e-66	218	COG2124@1|root,KOG0158@2759|Eukaryota,38BTY@33154|Opisthokonta,3BF8S@33208|Metazoa,3CV2F@33213|Bilateria,42555@6656|Arthropoda,3SQY5@50557|Insecta,451FP@7147|Diptera,45WP1@7214|Drosophilidae	33208|Metazoa	Q	heme binding. It is involved in the biological process described with oxidation-reduction process	CYP3A4	GO:0001676,GO:0002933,GO:0003674,GO:0003824,GO:0004497,GO:0005488,GO:0005496,GO:0005506,GO:0005515,GO:0005575,GO:0005622,GO:0005623,GO:0005737,GO:0005783,GO:0005789,GO:0006066,GO:0006082,GO:0006629,GO:0006631,GO:0006633,GO:0006694,GO:0006706,GO:0006720,GO:0006721,GO:0006766,GO:0006775,GO:0006805,GO:0006807,GO:0008144,GO:0008150,GO:0008152,GO:0008202,GO:0008209,GO:0008289,GO:0008395,GO:0008610,GO:…	1.14.13.32,1.14.13.97,1.14.14.1,1.14.14.55,1.14.14.56	ko:K07424,ko:K14999,ko:K15003,ko:K17689,ko:K17690,ko:K17691,ko:K17692,ko:K17860	ko00140,ko00591,ko00830,ko00980,ko00982,ko00983,ko01100,ko05204,map00140,map00591,map00830,map00980,map00982,map00983,map01100,map05204	-	R02356,R03408,R05727,R07000,R07001,R07055,R07056,R07079,R07080,R07081,R07085,R07087,R08256,R08257,R08264,R08268,R08269,R08271,R08272,R08274,R08275,R08276,R08277,R08285,R08286,R08287,R08293,R08294,R08303,R08304,R08312,R08313,R08318,R08339,R08340,R08341,R08342,R08343,R08390,R08391,R08392,R09404,R09408,R09423	RC00046,RC00060,RC00181,RC00190,RC00225,RC00277,RC00490,RC00704,RC00723,RC00724,RC01198,RC01203,RC01349,RC01444,RC01445,RC01459,RC01624,RC01711,RC01727,RC02136,RC02225,RC02226,RC02228,RC02229,RC02230,RC02232,RC02234,RC02238,RC02239,RC02241,RC02246,RC02266,RC02267,RC02274,RC02281,RC02298,RC02299,RC02526,RC02531	ko00000,ko00001,ko00199,ko01000	-	-	-	p450
LOC119646315	818.418	1075.4	873.042	603.189	1664.68	1437.92	1352.48	1525.9	1788.36	1268.42	1464.8	1329.19	1821.67	1411.35	1623.91	1603.21	1684.79	1834	1941.06	1949.68	1913.29	2061.31	1562.89	1734.61	2556.47	2534.67	2040.11	2283.53	XP_037902665.1	7213.XP_004533936.1	2.45e-242	687	KOG0147@1|root,KOG0147@2759|Eukaryota,39R6Y@33154|Opisthokonta,3BANI@33208|Metazoa,3CXB8@33213|Bilateria,41VFH@6656|Arthropoda,3SH74@50557|Insecta,450S7@7147|Diptera	33208|Metazoa	A	nucleotide binding. It is involved in the biological process described with mRNA processing	RBM39	GO:0000375,GO:0000377,GO:0000381,GO:0000398,GO:0003674,GO:0003676,GO:0003712,GO:0003713,GO:0003723,GO:0003729,GO:0005488,GO:0005575,GO:0005622,GO:0005623,GO:0005634,GO:0005654,GO:0005815,GO:0005856,GO:0006139,GO:0006351,GO:0006396,GO:0006397,GO:0006725,GO:0006807,GO:0008150,GO:0008152,GO:0008380,GO:0009058,GO:0009059,GO:0009889,GO:0009891,GO:0009893,GO:0009987,GO:0010467,GO:0010468,GO:0010556,GO:…	-	ko:K13091	-	-	-	-	ko00000,ko03041	-	-	-	RBM39linker,RRM_1
LOC119646319	943.383	956.059	811.095	532.991	412.342	477.63	605.84	389.001	587.226	640.985	448.213	495.135	482.063	542.086	661.601	635.153	824.131	651.09	598.473	659.312	773.139	876.15	523.145	969.585	848.525	624.755	681.354	892.826	XP_037902668.1	7165.AGAP009255-PA	4.31e-220	618	COG5391@1|root,KOG2273@2759|Eukaryota,38B4R@33154|Opisthokonta,3BA59@33208|Metazoa,3CWCM@33213|Bilateria,41UFR@6656|Arthropoda,3SGXU@50557|Insecta,44ZC3@7147|Diptera,45EZV@7148|Nematocera	33208|Metazoa	U	Vps5 C terminal like	SNX2	GO:0000323,GO:0000902,GO:0001845,GO:0003674,GO:0005102,GO:0005154,GO:0005158,GO:0005488,GO:0005515,GO:0005543,GO:0005547,GO:0005575,GO:0005622,GO:0005623,GO:0005737,GO:0005764,GO:0005768,GO:0005769,GO:0005773,GO:0005829,GO:0006810,GO:0006886,GO:0006897,GO:0006898,GO:0006906,GO:0006909,GO:0006915,GO:0006996,GO:0007033,GO:0007040,GO:0007275,GO:0007399,GO:0007610,GO:0007638,GO:0008104,GO:0008150,GO:…	-	ko:K17917	ko04144,map04144	-	-	-	ko00000,ko00001,ko04131	-	-	-	PX,Sorting_nexin,Vps5
LOC119646320	399.492	430.158	542.492	349.27	427.764	310.479	506.061	399.386	407.275	397.614	395.934	315.781	352.993	404.131	337.053	406.278	403.75	339.306	467.676	357.244	290.872	317.7	264.008	333.127	456.709	379.254	380.872	338.985	XP_037902670.1	7370.XP_005181809.1	0	986	COG0339@1|root,KOG2090@2759|Eukaryota,38FWV@33154|Opisthokonta,3B9X7@33208|Metazoa,3CTJ9@33213|Bilateria,41VVJ@6656|Arthropoda,3SI21@50557|Insecta,44WSY@7147|Diptera	33208|Metazoa	O	metalloendopeptidase activity. It is involved in the biological process described with proteolysis	MIPEP	GO:0003674,GO:0003824,GO:0004175,GO:0004222,GO:0005575,GO:0005622,GO:0005623,GO:0005737,GO:0005739,GO:0005759,GO:0006508,GO:0006518,GO:0006605,GO:0006626,GO:0006627,GO:0006807,GO:0006810,GO:0006839,GO:0006886,GO:0006996,GO:0007005,GO:0008104,GO:0008150,GO:0008152,GO:0008233,GO:0008237,GO:0009987,GO:0010467,GO:0015031,GO:0015833,GO:0016043,GO:0016485,GO:0016787,GO:0019538,GO:0031974,GO:0033036,GO:…	3.4.24.59	ko:K01410	-	-	-	-	ko00000,ko01000,ko01002,ko03029	-	-	-	Peptidase_M3
LOC119646323	58.4848	56.0803	43.0576	41.891	18.9449	30.4297	47.4851	27.111	58.0049	33.4539	31.9266	94.8803	30.5685	129.019	36.7585	55.3031	39.2351	34.4898	28.6921	33.9739	39.4515	29.6115	22.9054	32.4666	34.9217	20.3626	43.2822	43.4683	XP_037902671.1	7370.XP_005182882.1	1.44e-88	268	KOG2899@1|root,KOG2899@2759|Eukaryota,38CII@33154|Opisthokonta,3BIUH@33208|Metazoa,3CVCW@33213|Bilateria,41ZFJ@6656|Arthropoda,3SMGC@50557|Insecta,452XN@7147|Diptera	33208|Metazoa	S	methyltransferase activity	BCDIN3D	GO:0001510,GO:0003674,GO:0003824,GO:0005575,GO:0005622,GO:0005623,GO:0005634,GO:0005737,GO:0005829,GO:0006139,GO:0006725,GO:0006807,GO:0008150,GO:0008152,GO:0008168,GO:0008171,GO:0008173,GO:0009451,GO:0009892,GO:0009893,GO:0009987,GO:0010468,GO:0010586,GO:0010604,GO:0010605,GO:0010628,GO:0010629,GO:0016070,GO:0016740,GO:0016741,GO:0019219,GO:0019222,GO:0031323,GO:0031324,GO:0032259,GO:0034641,GO:…	-	-	-	-	-	-	-	-	-	-	Bin3
LOC119646324	660.486	137.545	102.863	400.155	82.4517	156.955	80.8551	79.0991	106.925	125.755	127.121	172.222	66.9312	239.849	71.3805	86.7798	79.923	70.279	102.766	66.5758	82.8028	60.5233	239.68	71.2754	123.927	135.23	91.1574	76.4508	NA	NA	NA	NA	NA	NA	NA	NA	NA	NA	NA	NA	NA	NA	NA	NA	NA	NA	NA	NA	NA
LOC119646325	455.664	234.496	173.649	736.314	993.819	441.326	226.716	552.737	120.407	253.367	324.662	162.621	146.695	256.161	188.025	101.949	177.09	72.4791	132.73	211.943	152.48	173.003	221.105	212.688	209.627	200.579	188.785	332.499	XP_037902675.1	7213.XP_004524851.1	1.09e-58	204	2AMXB@1|root,2SF49@2759|Eukaryota,3ACI7@33154|Opisthokonta,3BVVK@33208|Metazoa,3DGYD@33213|Bilateria,422IH@6656|Arthropoda,3SNR1@50557|Insecta,452MC@7147|Diptera	33208|Metazoa	S	transferase activity, transferring phosphorus-containing groups	-	-	-	-	-	-	-	-	-	-	-	-	EcKinase
LOC119646327	403.084	361.409	8.07698	22524	0	19812.9	8575.45	19.8368	62.9415	13.1675	77448.6	4.38964	29.7208	22371.9	13828	21.4991	8.7189	11.4901	44.2461	10.3187	2.63197	2.27054	17.3563	5.40718	4.1555	16.6428	40.977	13.6912	XP_037902680.1	7165.AGAP008817-PA	1.22e-21	101	2E6M2@1|root,2SDAB@2759|Eukaryota,3A139@33154|Opisthokonta,3BPT5@33208|Metazoa,3E5PY@33213|Bilateria,41Z5G@6656|Arthropoda,3SJP4@50557|Insecta,44YYH@7147|Diptera,45E3D@7148|Nematocera	33208|Metazoa	-	-	-	-	-	-	-	-	-	-	-	-	-	-	-
LOC119646328	26.5602	114.756	423.094	1346.19	519.946	963.853	679.869	1038.55	771.908	765.489	1875.13	468.782	1003.7	526.105	482.364	910.104	1290.7	1650.65	1434.06	1455.16	692.846	631.404	737.1	1544.42	180.337	195.913	368.735	173.253	XP_037902681.1	7244.FBpp0232786	1.52e-160	466	2C2BC@1|root,2S19I@2759|Eukaryota,3A434@33154|Opisthokonta,3BS3K@33208|Metazoa,3D8EI@33213|Bilateria,42A31@6656|Arthropoda,3SZIE@50557|Insecta,452SI@7147|Diptera,45NZN@7214|Drosophilidae	33208|Metazoa	S	It is involved in the biological process described with regulation of transcription, DNA-templated	-	GO:0005575,GO:0005622,GO:0005623,GO:0005737,GO:0006022,GO:0006023,GO:0006030,GO:0006031,GO:0006034,GO:0006035,GO:0006040,GO:0006807,GO:0007275,GO:0008150,GO:0008152,GO:0009058,GO:0009059,GO:0009653,GO:0009887,GO:0009987,GO:0017144,GO:0032501,GO:0032502,GO:0040003,GO:0042335,GO:0043170,GO:0044237,GO:0044424,GO:0044464,GO:0045177,GO:0046349,GO:0048513,GO:0048731,GO:0048856,GO:0060438,GO:0060439,GO:…	-	-	-	-	-	-	-	-	-	-	MH2
LOC119646331	345.099	389.927	326.693	1333.21	502.167	359.405	349.545	425.5	372.721	366.6	484.363	354.689	332.68	555.918	382.849	315.656	440.41	446.848	320.743	400.43	408.258	505.143	364.724	376.684	390.624	484.336	395.332	425.441	XP_037902683.1	7159.AAEL006420-PA	1.16e-127	365	KOG4025@1|root,KOG4025@2759|Eukaryota,38C8U@33154|Opisthokonta,3B9B9@33208|Metazoa,3CXIY@33213|Bilateria,41Y8D@6656|Arthropoda,3SHS0@50557|Insecta,44ZMW@7147|Diptera,45GYZ@7148|Nematocera	33208|Metazoa	S	Protein of unknown function (DUF1241)	PDCD10	GO:0000139,GO:0000302,GO:0001568,GO:0001932,GO:0001934,GO:0001936,GO:0001937,GO:0001944,GO:0002009,GO:0002011,GO:0003007,GO:0003674,GO:0005488,GO:0005515,GO:0005575,GO:0005622,GO:0005623,GO:0005737,GO:0005794,GO:0005829,GO:0005886,GO:0006915,GO:0006928,GO:0006950,GO:0006979,GO:0006996,GO:0007029,GO:0007030,GO:0007154,GO:0007165,GO:0007275,GO:0007507,GO:0008150,GO:0008219,GO:0008284,GO:0008285,GO:…	-	ko:K18269	-	-	-	-	ko00000,ko04147	-	-	-	DUF1241
LOC119646332	61.3812	55.963	294.161	6255.69	2633.99	520.151	1662.83	2989.87	1314.51	1468.32	3690.91	1132.67	1207.4	0	592.048	1241.39	3825.15	6481.18	3802.18	6379.97	1855.5	2270.35	2096.85	5413.47	123.666	247.14	459.734	31.0429	XP_037902685.1	7234.FBpp0175739	2.75e-39	149	2D6YQ@1|root,2T3HG@2759|Eukaryota,38XBP@33154|Opisthokonta,3C5H0@33208|Metazoa,3DRHS@33213|Bilateria,427NS@6656|Arthropoda,3SXDZ@50557|Insecta,4501Q@7147|Diptera,45PVV@7214|Drosophilidae	33208|Metazoa	S	Structural constituent of cuticle	-	GO:0002376,GO:0003674,GO:0005198,GO:0005214,GO:0005575,GO:0005576,GO:0006950,GO:0006952,GO:0006955,GO:0006959,GO:0007275,GO:0007599,GO:0008010,GO:0008150,GO:0009611,GO:0031012,GO:0032501,GO:0032502,GO:0040003,GO:0042060,GO:0042302,GO:0042335,GO:0042381,GO:0044421,GO:0045087,GO:0048856,GO:0050817,GO:0050878,GO:0050896,GO:0065007,GO:0065008	-	-	-	-	-	-	-	-	-	-	Chitin_bind_4
LOC119646334	850.546	842.726	1237.23	833.444	3294.89	1068.34	1285.28	1890.69	988.989	1674.19	593.4	1430.25	1271.39	468.381	1112.86	993.817	3264.56	923.113	1351	2359.36	2813.99	1403.11	1477.02	2155.73	4294.62	1874.77	1209.61	1924.84	XP_037902688.1	43151.ADAC002561-PA	2.75e-177	514	COG2124@1|root,KOG0158@2759|Eukaryota,38BTY@33154|Opisthokonta,3BF8S@33208|Metazoa,3CV2F@33213|Bilateria,41VYX@6656|Arthropoda,3SGMH@50557|Insecta,44XUS@7147|Diptera,45FWK@7148|Nematocera	33208|Metazoa	Q	cytochrome P450	Cyp6a9	GO:0002118,GO:0003674,GO:0003824,GO:0004497,GO:0005575,GO:0005622,GO:0005623,GO:0005737,GO:0005783,GO:0005789,GO:0006082,GO:0006091,GO:0006629,GO:0006631,GO:0006805,GO:0006950,GO:0006952,GO:0007610,GO:0008150,GO:0008152,GO:0009055,GO:0009266,GO:0009404,GO:0009410,GO:0009605,GO:0009607,GO:0009617,GO:0009628,GO:0009636,GO:0009987,GO:0010033,GO:0010243,GO:0012505,GO:0014070,GO:0014074,GO:0016020,GO:…	-	ko:K14999	-	-	-	-	ko00000,ko00199,ko01000	-	-	-	p450
LOC119646335	452.912	310.712	268.157	226.809	475.133	194.62	224.914	251.676	280.198	210.999	158.452	214.428	267.771	256.856	223.733	233.45	263.018	267.094	406.159	251.739	311.389	229.878	363.2	293.285	375.156	350.241	268.969	302.526	XP_037902725.1	7260.FBpp0254003	1.27e-25	107	COG0666@1|root,KOG0504@2759|Eukaryota,3A1B8@33154|Opisthokonta,3BPK3@33208|Metazoa,3CZH5@33213|Bilateria,41ZK6@6656|Arthropoda,3SMP8@50557|Insecta,452HF@7147|Diptera,45WS1@7214|Drosophilidae	33208|Metazoa	S	Ankyrin repeat	ANKRD39	-	-	-	-	-	-	-	-	-	-	-	Ank_2,Ank_4,Ank_5
LOC119646336	1834.24	1392.14	1472.7	2340.03	1213.79	1388.5	1015.69	878.645	595.575	898.499	1195.09	751.623	1289.7	1215.09	1293.08	679.696	619.193	1133.87	1006.17	705.829	302.811	727.134	1475.34	1050.93	531.156	775.756	711.877	527.696	XP_037902689.1	136037.KDR21214	2.05e-24	111	COG2273@1|root,2RVCU@2759|Eukaryota,39ZIB@33154|Opisthokonta,3BNZE@33208|Metazoa,3D25B@33213|Bilateria,41X4H@6656|Arthropoda,3SG1B@50557|Insecta	33208|Metazoa	G	Hydrolase activity, hydrolyzing O-glycosyl compounds. It is involved in the biological process described with carbohydrate metabolic process	GNBP3	GO:0001530,GO:0001871,GO:0001872,GO:0002218,GO:0002220,GO:0002221,GO:0002238,GO:0002252,GO:0002253,GO:0002376,GO:0002429,GO:0002682,GO:0002684,GO:0002752,GO:0002757,GO:0002758,GO:0002764,GO:0002768,GO:0003674,GO:0005488,GO:0005575,GO:0005576,GO:0005623,GO:0006950,GO:0006952,GO:0007154,GO:0007165,GO:0007166,GO:0008150,GO:0008289,GO:0008329,GO:0009593,GO:0009595,GO:0009605,GO:0009607,GO:0009615,GO:…	-	ko:K20692,ko:K20697	ko04624,map04624	-	-	-	ko00000,ko00001	-	CBM39,GH16	-	CBM39,Glyco_hydro_16
LOC119646337	25.1744	79.3308	1158.31	181.994	62.4436	79.216	251.038	122.411	83.6472	215.644	117.804	25.4563	354.063	25.6144	86.2109	46.8493	82.8487	1702.87	2.39452	866.184	1006.5	592.432	0.910506	118.929	43.211	664.318	498.426	2147.7	NA	NA	NA	NA	NA	NA	NA	NA	NA	NA	NA	NA	NA	NA	NA	NA	NA	NA	NA	NA	NA
LOC119646338	57.6616	103.475	160.127	152.308	220.9	111.944	190.263	63.5762	159.456	243.977	207.296	271.265	164.528	318.348	81.7951	140.67	293.454	275.44	81.0249	54.1503	244.559	238	196.861	135.8	100.293	220.743	78.5511	41.8047	XP_037902692.1	7425.NV17909-PA	2.01e-13	79	2AMXB@1|root,2SF49@2759|Eukaryota,3ACI7@33154|Opisthokonta,3BVVK@33208|Metazoa,3DGYD@33213|Bilateria,422IH@6656|Arthropoda,3SNR1@50557|Insecta,46GH6@7399|Hymenoptera	33208|Metazoa	S	ZnF_C4 abd HLH domain containing kinases domain	-	-	-	-	-	-	-	-	-	-	-	-	EcKinase
LOC119646339	141.054	67.3876	115.841	99.6667	437.794	222.924	98.5953	339.667	159.034	178.258	47.7084	269.546	141.175	108.826	141.709	116.739	61.047	93.2055	33.5052	69.2223	67.1557	43.0706	81.199	103.642	76.4675	48.996	34.9075	90.2389	XP_037902693.1	7159.AAEL006630-PA	9.5e-68	228	2AMXB@1|root,2SF49@2759|Eukaryota,3ACI7@33154|Opisthokonta,3BVVK@33208|Metazoa,3DGYD@33213|Bilateria,422IH@6656|Arthropoda,3SR9M@50557|Insecta,458E6@7147|Diptera,45HNF@7148|Nematocera	33208|Metazoa	S	ZnF_C4 abd HLH domain containing kinases domain	-	-	-	-	-	-	-	-	-	-	-	-	EcKinase
LOC119646340	283.631	290.542	230.371	307.663	261.484	287.526	196.346	263.46	241.854	295.708	257.65	269.527	221.235	258.221	196.639	242.694	341.572	273.215	313.565	337.118	323.976	330.707	340.093	296.48	309.173	261.576	257.989	277.182	XP_037902694.1	7213.XP_004531269.1	2.61e-269	753	KOG2069@1|root,KOG2069@2759|Eukaryota,38FHH@33154|Opisthokonta,3BB0C@33208|Metazoa,3D0XY@33213|Bilateria,41WP9@6656|Arthropoda,3SKBK@50557|Insecta,44Z4D@7147|Diptera	33208|Metazoa	U	Conserved oligomeric Golgi complex	COG8	GO:0000003,GO:0000139,GO:0003006,GO:0005575,GO:0005622,GO:0005623,GO:0005737,GO:0005794,GO:0005802,GO:0006810,GO:0006888,GO:0006891,GO:0007275,GO:0007548,GO:0008150,GO:0008406,GO:0009653,GO:0009887,GO:0012505,GO:0016020,GO:0016192,GO:0017119,GO:0022414,GO:0030334,GO:0031090,GO:0031984,GO:0032501,GO:0032502,GO:0032588,GO:0032879,GO:0032991,GO:0035262,GO:0040012,GO:0043226,GO:0043227,GO:0043229,GO:…	-	ko:K20295	-	-	-	-	ko00000,ko04131	-	-	-	Dor1
LOC119646341	241.51	207.621	226.263	195.002	304.345	216.806	293.976	295.682	237.732	222.848	226.94	117.659	287.33	141.887	171.537	263.43	251.456	319.216	262.018	210.703	280.435	172.406	278.427	208.201	197.831	225.602	232.23	186.911	XP_037902695.1	7425.NV18221-PA	6.93e-39	154	KOG1414@1|root,KOG1414@2759|Eukaryota,39QGM@33154|Opisthokonta,3BFUN@33208|Metazoa,3CX98@33213|Bilateria,41ZG3@6656|Arthropoda,3SNR2@50557|Insecta,46H0Q@7399|Hymenoptera	33208|Metazoa	K	basic region leucin zipper	ATF2	GO:0000075,GO:0000077,GO:0000122,GO:0000278,GO:0000976,GO:0000977,GO:0000978,GO:0000980,GO:0000981,GO:0000982,GO:0000987,GO:0001012,GO:0001067,GO:0001077,GO:0001085,GO:0001101,GO:0001102,GO:0001158,GO:0001228,GO:0001817,GO:0001819,GO:0003007,GO:0003151,GO:0003674,GO:0003676,GO:0003677,GO:0003682,GO:0003690,GO:0003700,GO:0003705,GO:0003712,GO:0003713,GO:0003824,GO:0004402,GO:0005488,GO:0005515,GO:…	-	ko:K04450,ko:K09047	ko04010,ko04013,ko04022,ko04024,ko04151,ko04152,ko04211,ko04261,ko04624,ko04668,ko04714,ko04725,ko04728,ko04911,ko04915,ko04918,ko04922,ko04925,ko04926,ko04927,ko04931,ko04934,ko04962,ko05016,ko05030,ko05031,ko05034,ko05161,ko05164,ko05165,ko05166,ko05169,ko05203,ko05215,map04010,map04013,map04022,map04024,map04151,map04152,map04211,map04261,map04624,map04668,map04714,map04725,map04728,map04911,m…	-	-	-	ko00000,ko00001,ko03000	-	-	-	bZIP_1
LOC119646342	96.2145	192.071	211.865	313.619	590.458	637.048	500.769	651.776	332.072	457.694	194.517	319.057	365.678	185.201	610.4	432.635	362.838	703.022	456.673	498.405	976.443	407.556	588.796	714.829	167.384	342.176	452.069	291.331	XP_037902696.1	7370.XP_005176809.1	6.28e-86	264	2BGDU@1|root,2S199@2759|Eukaryota,3A3EU@33154|Opisthokonta,3BRX3@33208|Metazoa,3D8VM@33213|Bilateria,42056@6656|Arthropoda,3SMEE@50557|Insecta,4531I@7147|Diptera	33208|Metazoa	T	Required for homeostatic regulation of sleep under normal conditions and after sleep deprivation. Important regulator of the Sh K( ) channel, acting as a signaling molecule that connects sleep drive to lowered membrane excitability, possibly by enhancing K( ) channel activity and thus reducing neuronal excitability	-	GO:0003674,GO:0005488,GO:0005543,GO:0005575,GO:0005623,GO:0005886,GO:0008150,GO:0008289,GO:0009897,GO:0009966,GO:0009968,GO:0009986,GO:0010469,GO:0010646,GO:0010648,GO:0016020,GO:0022898,GO:0023051,GO:0023057,GO:0030431,GO:0031644,GO:0031645,GO:0032222,GO:0032409,GO:0032410,GO:0032412,GO:0032413,GO:0032501,GO:0032879,GO:0034235,GO:0034762,GO:0034763,GO:0034765,GO:0034766,GO:0035091,GO:0042391,GO:…	-	-	-	-	-	-	-	-	-	-	QVR
LOC119646344	2665.59	1629.54	1431.24	5476.04	2046.35	2538.9	1270.53	1128.75	1672.53	2171.25	2728.61	2970.84	1372.5	4008.36	1469.5	1501.47	1546.54	1457.08	1477.14	1275.63	1636.08	1470.97	2665.04	1736.19	1419.91	1713.82	1445.98	1502.34	XP_037902706.1	43151.ADAC000336-PA	6.29e-63	205	COG5066@1|root,KOG0439@2759|Eukaryota,39W5E@33154|Opisthokonta,3BHVG@33208|Metazoa,3CZXH@33213|Bilateria,41ZJ3@6656|Arthropoda,3SMSM@50557|Insecta,458W4@7147|Diptera,45IJ0@7148|Nematocera	33208|Metazoa	U	MSP (Major sperm protein) domain	VAPA	GO:0000226,GO:0000323,GO:0001505,GO:0001775,GO:0002252,GO:0002263,GO:0002274,GO:0002275,GO:0002283,GO:0002366,GO:0002376,GO:0002443,GO:0002444,GO:0002446,GO:0003674,GO:0005488,GO:0005515,GO:0005575,GO:0005576,GO:0005615,GO:0005622,GO:0005623,GO:0005634,GO:0005635,GO:0005737,GO:0005764,GO:0005765,GO:0005766,GO:0005773,GO:0005774,GO:0005783,GO:0005789,GO:0005794,GO:0005856,GO:0005886,GO:0006629,GO:…	-	ko:K06096,ko:K10707	ko04979,map04979	-	-	-	ko00000,ko00001,ko02000,ko04131	9.B.17.1.1	-	-	Motile_Sperm
LOC119646345	338.12	542.851	386.739	708.256	443.817	643.316	988.249	862.248	707.424	543.37	1130.68	372.821	736.831	957.672	956.37	608.489	384.781	837.175	867.193	684.193	440.129	365.796	465.334	659.323	111.653	282.089	325.515	286.932	XP_037902708.1	7159.AAEL003331-PA	1.81e-179	562	COG4886@1|root,KOG0619@2759|Eukaryota,38G2A@33154|Opisthokonta,3BJN8@33208|Metazoa,3D0FV@33213|Bilateria,41UH3@6656|Arthropoda,3SGCY@50557|Insecta,450JZ@7147|Diptera,45E49@7148|Nematocera	33208|Metazoa	S	Leucine rich repeat C-terminal domain	-	GO:0000902,GO:0000904,GO:0006928,GO:0006935,GO:0007275,GO:0007399,GO:0007409,GO:0007411,GO:0007424,GO:0008045,GO:0008150,GO:0009605,GO:0009653,GO:0009987,GO:0016043,GO:0022008,GO:0030030,GO:0030154,GO:0030182,GO:0031175,GO:0032501,GO:0032502,GO:0032989,GO:0032990,GO:0035150,GO:0035151,GO:0035152,GO:0035159,GO:0040011,GO:0042221,GO:0042330,GO:0048468,GO:0048666,GO:0048667,GO:0048699,GO:0048731,GO:…	-	-	-	-	-	-	-	-	-	-	LRR_1,LRR_5,LRR_8
LOC119646347	196.975	93.1238	284.244	1229.21	874.279	571.371	269.409	513.27	603.816	644.105	409.139	783.14	388	1041.38	315.427	394.762	125.001	61.2832	320.728	163.433	395.072	199.383	745.995	318.117	313.336	434.445	301.249	257.032	NA	NA	NA	NA	NA	NA	NA	NA	NA	NA	NA	NA	NA	NA	NA	NA	NA	NA	NA	NA	NA
LOC119646348	114.449	143.008	125.917	41.8895	95.0746	140.062	117.932	99.2415	237.736	164.107	69.5241	180.007	122.204	130.146	127.074	161.284	109.013	100.876	99.2959	103.164	71.0913	107.793	139.711	102.753	65.6687	57.3297	85.7618	70.8949	XP_037902710.1	7159.AAEL001407-PA	1.37e-171	484	KOG0594@1|root,KOG0594@2759|Eukaryota,38I5W@33154|Opisthokonta,3BC5E@33208|Metazoa,3CVB1@33213|Bilateria,41TQS@6656|Arthropoda,3SGAU@50557|Insecta,44Z8S@7147|Diptera,45F9B@7148|Nematocera	33208|Metazoa	T	Belongs to the protein kinase superfamily	CDK6	GO:0000003,GO:0000079,GO:0000082,GO:0000122,GO:0000166,GO:0000278,GO:0000307,GO:0000785,GO:0001101,GO:0001558,GO:0001654,GO:0001726,GO:0001775,GO:0001932,GO:0001933,GO:0001952,GO:0001954,GO:0002064,GO:0002065,GO:0002066,GO:0002067,GO:0002068,GO:0002088,GO:0002119,GO:0002164,GO:0002237,GO:0002244,GO:0002376,GO:0002520,GO:0002521,GO:0002682,GO:0002683,GO:0002761,GO:0002762,GO:0003002,GO:0003006,GO:…	2.7.11.22	ko:K02089,ko:K02091,ko:K02503	ko01522,ko04110,ko04115,ko04151,ko04218,ko04530,ko04660,ko04933,ko04934,ko05161,ko05162,ko05165,ko05166,ko05167,ko05200,ko05203,ko05206,ko05212,ko05214,ko05218,ko05219,ko05220,ko05222,ko05223,ko05224,ko05225,map01522,map04110,map04115,map04151,map04218,map04530,map04660,map04933,map04934,map05161,map05162,map05165,map05166,map05167,map05200,map05203,map05206,map05212,map05214,map05218,map05219,ma…	M00692	-	-	ko00000,ko00001,ko00002,ko01000,ko01001,ko04147	-	-	-	Pkinase
LOC119646349	40460.7	11249.9	9203.67	8406.63	4555.22	9089.07	3974.71	12169.3	5425.08	11021.7	13868.9	21478.2	4694.82	16408.4	11132	9145.95	27791.6	0	0	24068.2	31788.5	12988.2	0.914213	4368.47	21134	210.886	6.83149	38824.2	XP_037902711.1	7370.XP_005180154.1	5.48e-91	282	28N19@1|root,2R63T@2759|Eukaryota,39YAF@33154|Opisthokonta,3BP5G@33208|Metazoa,3D09Z@33213|Bilateria,41Y9V@6656|Arthropoda,3SQJT@50557|Insecta,4556N@7147|Diptera	33208|Metazoa	O	Phosphatidylcholine 1-acylhydrolase activity. It is involved in the biological process described with lipid metabolic process	-	GO:0003674,GO:0003824,GO:0006629,GO:0008150,GO:0008152,GO:0009056,GO:0016042,GO:0016298,GO:0016787,GO:0016788,GO:0044238,GO:0071704,GO:1901575	-	-	-	-	-	-	-	-	-	-	Lipase
LOC119646351	0	6.26925	8.76315	2.8891	0	2.43829	0	5.23481	6.62589	5.06161	8.34807	0.877809	9.07814	5.33791	5.56518	3.84059	0	0	23.9123	0	1.31791	0	10.0062	0	0	0	14.4138	0	XP_037902714.1	7227.FBpp0304311	0	1214	KOG4418@1|root,KOG4418@2759|Eukaryota,38DVM@33154|Opisthokonta,3BCTJ@33208|Metazoa,3CRX0@33213|Bilateria,41UTP@6656|Arthropoda,3SGKU@50557|Insecta,44YZ2@7147|Diptera,45WHG@7214|Drosophilidae	33208|Metazoa	S	G-protein coupled GABA receptor activity. It is involved in the biological process described with G-protein coupled receptor signaling pathway	-	-	-	ko:K08469	-	-	-	-	ko00000,ko04030	-	-	-	7tm_3
LOC119646354	1260.38	974.809	924.285	629.926	591.788	809.759	1035.53	2673.34	985.213	630.44	771.165	1202.57	572.482	2777.6	1236.71	930.245	13773.3	3.83218	0	478.231	4792.28	535.721	0	6575.49	10358.9	624.576	13.6673	899.871	XP_037902719.1	43151.ADAC001208-PA	7.46e-93	289	28N19@1|root,2R63T@2759|Eukaryota,39YAF@33154|Opisthokonta,3BP5G@33208|Metazoa,3D09Z@33213|Bilateria,41Y9V@6656|Arthropoda,3SQJT@50557|Insecta,4556N@7147|Diptera,45H7V@7148|Nematocera	33208|Metazoa	O	Alpha/beta hydrolase family	-	GO:0003674,GO:0003824,GO:0006629,GO:0008150,GO:0008152,GO:0009056,GO:0016042,GO:0016298,GO:0016787,GO:0016788,GO:0044238,GO:0071704,GO:1901575	-	ko:K19404	-	-	-	-	ko00000,ko01000	-	-	-	Lipase
LOC119646355	47.4425	4.85787	6.06063	13.0036	38.0078	32.8872	22.8834	26.113	11.6003	4.05362	24.3129	29.8647	19.824	53.3457	29.8575	14.596	93.048	2.55464	9.57128	0	10.5329	12.4954	23.7645	18.0331	19.9565	0	0	0	XP_037902720.1	7227.FBpp0084520	1.45e-72	235	28N19@1|root,2R63T@2759|Eukaryota,39YAF@33154|Opisthokonta,3BP5G@33208|Metazoa,3D09Z@33213|Bilateria,41Y9V@6656|Arthropoda,3SQJT@50557|Insecta,455R9@7147|Diptera,45W0Z@7214|Drosophilidae	33208|Metazoa	O	Phosphatidylcholine 1-acylhydrolase activity. It is involved in the biological process described with lipid	-	GO:0003674,GO:0003824,GO:0006629,GO:0008150,GO:0008152,GO:0009056,GO:0016042,GO:0016298,GO:0016787,GO:0016788,GO:0044238,GO:0071704,GO:1901575	-	-	-	-	-	-	-	-	-	-	Lipase
LOC119646356	427.404	254.997	320.597	651.443	704.417	392.264	264.988	341.788	143.295	356.503	232.648	193.156	222.902	280.608	367.498	182.021	271.804	325.575	222.58	406.446	316.04	401.152	311.97	423.569	295.059	305.056	312.642	420.586	XP_037902721.1	7245.FBpp0258040	2.15e-219	619	COG0493@1|root,KOG1800@2759|Eukaryota,38D89@33154|Opisthokonta,3BBUN@33208|Metazoa,3CRSC@33213|Bilateria,41WR7@6656|Arthropoda,3SGJF@50557|Insecta,4501D@7147|Diptera,45SYN@7214|Drosophilidae	33208|Metazoa	C	Oxidoreductase activity. It is involved in the biological process described with oxidation-reduction process	FDXR	GO:0000166,GO:0002165,GO:0003674,GO:0003824,GO:0004324,GO:0005488,GO:0005575,GO:0005622,GO:0005623,GO:0005737,GO:0005739,GO:0005759,GO:0006066,GO:0006091,GO:0006139,GO:0006629,GO:0006694,GO:0006700,GO:0006706,GO:0006707,GO:0006725,GO:0006732,GO:0006733,GO:0006739,GO:0006743,GO:0006744,GO:0006753,GO:0006793,GO:0006796,GO:0006807,GO:0007275,GO:0007552,GO:0007591,GO:0007610,GO:0007635,GO:0008150,GO:…	1.18.1.6	ko:K10846,ko:K18914	ko03420,map03420	-	-	-	ko00000,ko00001,ko01000,ko03029,ko03400	-	-	-	Pyr_redox_2
LOC119646361	321.244	193.153	300.389	3076.66	430.94	838.122	304.601	193.363	1029.57	502.349	975.813	600.543	706.686	1168.3	247.311	765.715	313.956	633.278	220.185	465.363	302.869	142.789	329.313	579.482	212.776	722.896	193.505	343.235	XP_037902726.1	7220.FBpp0140806	2.99e-18	81.6	2FAVD@1|root,2TC2J@2759|Eukaryota,397FZ@33154|Opisthokonta,3CBRZ@33208|Metazoa,3DT1F@33213|Bilateria,4294C@6656|Arthropoda,3SW1K@50557|Insecta,454N3@7147|Diptera,45UIF@7214|Drosophilidae	33208|Metazoa	-	-	-	GO:0002791,GO:0002792,GO:0006950,GO:0007154,GO:0008150,GO:0009267,GO:0009605,GO:0009743,GO:0009966,GO:0009987,GO:0009991,GO:0010033,GO:0010646,GO:0010648,GO:0010817,GO:0023051,GO:0023057,GO:0031667,GO:0031668,GO:0031669,GO:0032879,GO:0033500,GO:0033554,GO:0042221,GO:0042592,GO:0042593,GO:0042594,GO:0046883,GO:0046888,GO:0048519,GO:0048523,GO:0048583,GO:0048878,GO:0050789,GO:0050794,GO:0050848,GO:…	-	-	-	-	-	-	-	-	-	-	-
LOC119646362	910.698	471.791	406.811	829.108	280.392	476.323	301.966	316.708	400.893	399.038	406.704	571.565	315.364	734.064	316.789	386.314	389.538	365.154	314.727	331.334	385.834	403.403	458.819	316.324	416.406	348.5	293.67	388.358	XP_037902727.1	7244.FBpp0235096	3.98e-136	394	KOG3113@1|root,KOG3113@2759|Eukaryota,38H16@33154|Opisthokonta,3BCHG@33208|Metazoa,3D39N@33213|Bilateria,41YKY@6656|Arthropoda,3SG2S@50557|Insecta,450CP@7147|Diptera,45XZ1@7214|Drosophilidae	33208|Metazoa	S	Rtf2 RING-finger	RTFDC1	GO:0005575,GO:0005622,GO:0005623,GO:0005634,GO:0006139,GO:0006259,GO:0006260,GO:0006261,GO:0006274,GO:0006725,GO:0006807,GO:0008150,GO:0008152,GO:0009058,GO:0009059,GO:0009987,GO:0010453,GO:0019222,GO:0031494,GO:0034641,GO:0034645,GO:0043170,GO:0043226,GO:0043227,GO:0043229,GO:0043231,GO:0044237,GO:0044238,GO:0044249,GO:0044260,GO:0044424,GO:0044464,GO:0045595,GO:0046483,GO:0050789,GO:0050793,GO:…	-	-	-	-	-	-	-	-	-	-	Rtf2
LOC119646363	5150.12	1929.8	1247.83	5743.16	3035.05	2762.49	1791.18	1457.56	1642.58	2505.99	3016.2	2845.76	1272.33	5022.64	1665.42	1329.44	1789.26	1542.44	1563.76	1479.27	1416.68	1784.02	3352.76	1905.34	1873.56	1727.12	1451.04	1568.62	XP_037902728.1	7213.XP_004534918.1	5.62e-135	396	KOG4010@1|root,KOG4010@2759|Eukaryota,38DH1@33154|Opisthokonta,3BKWS@33208|Metazoa,3CSS2@33213|Bilateria,41WJH@6656|Arthropoda,3SM7C@50557|Insecta,44X2Q@7147|Diptera	33208|Metazoa	S	Tumour protein D52 family	TPD52L2	GO:0003674,GO:0005488,GO:0005515,GO:0005575,GO:0005622,GO:0005623,GO:0005737,GO:0008150,GO:0042127,GO:0042802,GO:0042803,GO:0044424,GO:0044444,GO:0044464,GO:0046982,GO:0046983,GO:0048471,GO:0050789,GO:0050794,GO:0065007	-	-	-	-	-	-	-	-	-	-	TPD52
LOC119646364	5.84541	29.9113	41.9594	84.4072	72.9227	17.976	15.7187	29.4151	28.4702	11.7875	43.6732	20.4701	14.8832	34.9211	20.0278	13.4522	7.68762	14.9843	15.027	9.45564	9.80968	6.91726	6.81337	35.3305	8.80862	4.87961	11.2427	7.49121	XP_037902730.1	7159.AAEL008952-PA	1.28e-11	70.9	COG5160@1|root,KOG0778@2759|Eukaryota,38HPZ@33154|Opisthokonta,3BCKW@33208|Metazoa,3CYJ0@33213|Bilateria,41XJI@6656|Arthropoda,3SGUT@50557|Insecta,450SV@7147|Diptera,45KHK@7148|Nematocera	33208|Metazoa	O	Ulp1 protease family, C-terminal catalytic domain	SENP1	GO:0002682,GO:0003674,GO:0003824,GO:0004175,GO:0004197,GO:0005575,GO:0005622,GO:0005623,GO:0005634,GO:0005635,GO:0005654,GO:0005737,GO:0005912,GO:0005924,GO:0005925,GO:0006282,GO:0006355,GO:0006357,GO:0006464,GO:0006508,GO:0006807,GO:0006915,GO:0006919,GO:0007154,GO:0007165,GO:0007275,GO:0008150,GO:0008152,GO:0008219,GO:0008233,GO:0008234,GO:0009790,GO:0009792,GO:0009889,GO:0009891,GO:0009892,GO:…	3.4.22.68	ko:K08592	-	-	-	-	ko00000,ko01000,ko01002,ko04121	-	-	-	Peptidase_C48
LOC119646366	8.20711	2.70869	0.667265	17.3716	5.02208	0	6.98135	1.02594	3.32523	2.04011	1.72363	3.52925	2.48609	15.9613	3.43156	3.83769	0	1.27967	8.30637	0	0	10.5752	0.941274	9.04653	5.83305	1.86647	9.14654	0	NA	NA	NA	NA	NA	NA	NA	NA	NA	NA	NA	NA	NA	NA	NA	NA	NA	NA	NA	NA	NA
LOC119646367	166.282	25.0256	16.1669	70.7769	25.9794	29.2408	10.5661	21.9565	7.45434	13.1647	20.0742	14.0468	4.95292	18.1399	9.72827	6.14416	20.3489	17.8736	4.78743	13.2479	6.58508	6.79422	41.0246	9.91251	7.47988	4.62132	26.5572	2.41732	NA	NA	NA	NA	NA	NA	NA	NA	NA	NA	NA	NA	NA	NA	NA	NA	NA	NA	NA	NA	NA
LOC119646369	0	3.61895	0.701759	4.51541	0	1.26929	6.35524	4.71612	7.47362	8.44336	11.3399	3.65963	0	0	0.723779	2.40086	0	3.99137	16.2087	0	1.18825	0	4.11447	0.939121	0.866107	9.63342	4.79279	2.51861	XP_037902733.1	7244.FBpp0232094	1.4e-144	417	COG0646@1|root,KOG1579@2759|Eukaryota,38BGW@33154|Opisthokonta,3BIZV@33208|Metazoa,3CUSA@33213|Bilateria,41VTM@6656|Arthropoda,3SGBD@50557|Insecta,44WZG@7147|Diptera,45Q8N@7214|Drosophilidae	33208|Metazoa	E	S-adenosylmethionine-homocysteine S-methyltransferase activity	-	-	2.1.1.10	ko:K00547	ko00270,ko01100,ko01110,map00270,map01100,map01110	-	R00650	RC00003,RC00035	ko00000,ko00001,ko01000	-	-	-	S-methyl_trans
LOC119646370	550.003	144.518	89.2745	394.469	179.324	263.765	61.4331	75.7435	86.2521	106.607	115.893	212.785	54.578	243.963	71.2414	56.0591	74.1103	63.9264	59.6667	43.0584	64.3177	57.4513	160.586	65.9104	137.301	113.172	65.3778	84.4269	XP_037902734.1	7213.XP_004530278.1	5.95e-56	179	KOG4057@1|root,KOG4057@2759|Eukaryota,3A46X@33154|Opisthokonta,3BRY4@33208|Metazoa,3DA52@33213|Bilateria,41Z96@6656|Arthropoda,3SZMJ@50557|Insecta,458Z2@7147|Diptera	33208|Metazoa	K	Mediator of RNA polymerase II transcription subunit	MED11	GO:0000151,GO:0005575,GO:0005622,GO:0005623,GO:0005634,GO:0005654,GO:0006464,GO:0006807,GO:0008150,GO:0008152,GO:0009987,GO:0016567,GO:0016592,GO:0019538,GO:0031974,GO:0031981,GO:0032446,GO:0032991,GO:0036211,GO:0043170,GO:0043226,GO:0043227,GO:0043229,GO:0043231,GO:0043233,GO:0043412,GO:0044237,GO:0044238,GO:0044260,GO:0044267,GO:0044422,GO:0044424,GO:0044428,GO:0044446,GO:0044451,GO:0044464,GO:…	-	ko:K15131	-	-	-	-	ko00000,ko03021	-	-	-	Med11
LOC119646371	3813.27	960.776	733.578	3180.17	1504.12	1680.31	822.567	911.68	841.568	1189.6	1416.36	1707.43	813.525	2036.8	767.153	654.944	723.56	758.64	764.674	721.837	829.423	739.928	1737.09	835.05	716.862	1120.93	786.831	718.846	XP_037902735.1	7244.FBpp0232095	1.68e-45	147	COG5272@1|root,KOG0005@2759|Eukaryota,3A5PS@33154|Opisthokonta,3BSQN@33208|Metazoa,3D98U@33213|Bilateria,420FH@6656|Arthropoda,3SNIZ@50557|Insecta,4548S@7147|Diptera,45YKI@7214|Drosophilidae	33208|Metazoa	O	Ubiquitin-like domain	NEDD8	GO:0003674,GO:0005488,GO:0005515,GO:0005575,GO:0005622,GO:0005623,GO:0005634,GO:0005737,GO:0006464,GO:0006807,GO:0008150,GO:0008152,GO:0008283,GO:0008589,GO:0009892,GO:0009966,GO:0009968,GO:0009987,GO:0010468,GO:0010605,GO:0010629,GO:0010646,GO:0010648,GO:0010941,GO:0010942,GO:0019222,GO:0019538,GO:0019827,GO:0023051,GO:0023057,GO:0030162,GO:0030431,GO:0030718,GO:0031323,GO:0031386,GO:0031396,GO:…	-	ko:K12158	-	-	-	-	ko00000,ko04121	-	-	-	ubiquitin
LOC119646374	245.217	300.44	277.337	198.632	214.736	272.503	299.765	270.183	226.144	202.323	289.268	190.188	234.339	223.856	277.408	238.59	358.063	488.315	423.863	408.792	281.539	382.475	297.648	433.202	284.452	400.362	355.757	434.247	XP_037902741.1	7159.AAEL018236-PA	9.35e-83	267	KOG1216@1|root,KOG1216@2759|Eukaryota,38TEU@33154|Opisthokonta,3B98U@33208|Metazoa,3CRF5@33213|Bilateria,41TQR@6656|Arthropoda,3SGXG@50557|Insecta,44ZK7@7147|Diptera,45BMF@7148|Nematocera	33208|Metazoa	VW	C8	BMPER	GO:0001525,GO:0001568,GO:0001655,GO:0001657,GO:0001775,GO:0001822,GO:0001823,GO:0001932,GO:0001934,GO:0001935,GO:0001944,GO:0002009,GO:0002040,GO:0002043,GO:0002165,GO:0003002,GO:0003674,GO:0005102,GO:0005488,GO:0005515,GO:0005575,GO:0005576,GO:0005615,GO:0005623,GO:0006355,GO:0006357,GO:0007275,GO:0007389,GO:0007423,GO:0007444,GO:0007472,GO:0007474,GO:0007476,GO:0007552,GO:0007560,GO:0008150,GO:…	-	-	-	-	-	-	-	-	-	-	C8,TIL,VWC,VWD
LOC119646376	626.232	418.264	536.529	774.246	828.764	713.549	497.986	442.696	814.321	765.988	289.244	917.7	218.845	566.363	438.672	899.347	271.807	293.719	316.944	349.545	358.004	338.553	351	401.153	197.028	369.969	264.154	180.439	XP_037902743.1	7370.XP_005185138.1	3.68e-161	460	KOG3296@1|root,KOG3296@2759|Eukaryota,38FFD@33154|Opisthokonta,3B974@33208|Metazoa,3CT7X@33213|Bilateria,41UKP@6656|Arthropoda,3SJA5@50557|Insecta,4501G@7147|Diptera	33208|Metazoa	U	It is involved in the biological process described with transmembrane transport	TOMM40L	GO:0001666,GO:0003674,GO:0005048,GO:0005215,GO:0005216,GO:0005261,GO:0005488,GO:0005515,GO:0005575,GO:0005622,GO:0005623,GO:0005737,GO:0005739,GO:0005740,GO:0005741,GO:0005742,GO:0005743,GO:0005758,GO:0005829,GO:0006605,GO:0006626,GO:0006810,GO:0006811,GO:0006812,GO:0006839,GO:0006886,GO:0006950,GO:0006996,GO:0007005,GO:0007006,GO:0008104,GO:0008150,GO:0008320,GO:0008324,GO:0008565,GO:0009628,GO:…	-	ko:K11518	ko05014,map05014	-	-	-	ko00000,ko00001,ko02000,ko03029	3.A.8.1	-	-	Porin_3
LOC119646378	315.872	275.182	605.498	317.518	561.08	314.409	518.414	593.875	278.397	592.393	190.759	535.538	279.114	164.322	191.74	453.815	988.052	681.853	380.666	773.121	562.142	851.903	284.478	1019.84	543.617	298.693	363.43	299.716	XP_037902745.1	7370.XP_005176310.1	1.37e-150	449	KOG1192@1|root,KOG1192@2759|Eukaryota,3ABE4@33154|Opisthokonta,3BZ0V@33208|Metazoa,3CWJW@33213|Bilateria,422E9@6656|Arthropoda,3SHWX@50557|Insecta,44X92@7147|Diptera	33208|Metazoa	G	transferase activity, transferring hexosyl groups. It is involved in the biological process described with metabolic process	Ugt37b1	GO:0003674,GO:0003824,GO:0005575,GO:0005622,GO:0005623,GO:0006011,GO:0006139,GO:0006725,GO:0006793,GO:0006807,GO:0008150,GO:0008152,GO:0008194,GO:0009225,GO:0009987,GO:0015020,GO:0016020,GO:0016021,GO:0016740,GO:0016757,GO:0016758,GO:0031224,GO:0034641,GO:0043226,GO:0043227,GO:0043229,GO:0043231,GO:0044237,GO:0044238,GO:0044281,GO:0044424,GO:0044425,GO:0044464,GO:0046483,GO:0055086,GO:0071704,GO:…	2.4.1.17,2.4.1.47	ko:K00699,ko:K04628	ko00040,ko00053,ko00140,ko00565,ko00600,ko00830,ko00860,ko00980,ko00982,ko00983,ko01100,ko01110,ko05204,map00040,map00053,map00140,map00565,map00600,map00830,map00860,map00980,map00982,map00983,map01100,map01110,map05204	M00014,M00067,M00129	R01383,R01500,R02358,R02389,R02478,R02502,R02902,R03091,R04322,R04352,R04353,R04354,R04683,R06277,R07106,R08259,R08261,R08262,R08263,R08615,R09426,R09427,R09428,R10804	RC00005,RC00033,RC00049,RC00059,RC00078,RC00171,RC00397,RC00523,RC00529,RC00708,RC02748	ko00000,ko00001,ko00002,ko01000,ko01003	-	GT1	-	UDPGT
LOC119646379	299.52	175.596	134.239	380.877	208.973	193.638	192.077	205.502	125.723	180.446	201.049	148.2	137.735	257.157	162.208	105.823	106.099	216.492	137.161	143.106	139.555	179.598	288.382	150.719	128.392	147.381	140.544	145.172	XP_037902749.1	7370.XP_005190137.1	1.7e-10	69.7	2D7ZX@1|root,2T849@2759|Eukaryota,392JH@33154|Opisthokonta,3C7Y2@33208|Metazoa,3DNYP@33213|Bilateria,4257N@6656|Arthropoda,3SUQ2@50557|Insecta,4558E@7147|Diptera	33208|Metazoa	-	-	-	-	-	-	-	-	-	-	-	-	-	-	-
LOC119646380	180.301	209.985	260.104	115.598	90.0767	158.441	161.944	147.464	431.691	193.5	191.644	266.995	279.127	139.643	271.083	396.447	164.307	127.719	148.459	169.364	131.746	148.429	84.8311	159.565	147.163	165.513	157	160.406	XP_037902751.1	7370.XP_005174926.1	1.01e-250	708	COG1867@1|root,KOG1253@2759|Eukaryota,38I4E@33154|Opisthokonta,3BG0R@33208|Metazoa,3CXQC@33213|Bilateria,41TNP@6656|Arthropoda,3SICF@50557|Insecta,452RX@7147|Diptera	33208|Metazoa	J	tRNA (guanine-N2-)-methyltransferase activity. It is involved in the biological process described with tRNA processing	TRMT1	GO:0001510,GO:0002940,GO:0003674,GO:0003824,GO:0004809,GO:0005575,GO:0005622,GO:0005623,GO:0005634,GO:0005654,GO:0005737,GO:0005739,GO:0006139,GO:0006396,GO:0006399,GO:0006400,GO:0006725,GO:0006807,GO:0008033,GO:0008150,GO:0008152,GO:0008168,GO:0008170,GO:0008173,GO:0008175,GO:0008757,GO:0009451,GO:0009987,GO:0010467,GO:0016070,GO:0016423,GO:0016740,GO:0016741,GO:0030488,GO:0031974,GO:0031981,GO:…	1.1.1.21,2.1.1.215,2.1.1.216	ko:K00011,ko:K00555	ko00040,ko00051,ko00052,ko00561,ko00790,ko01100,map00040,map00051,map00052,map00561,map00790,map01100	-	R01036,R01041,R01093,R01095,R01431,R01758,R01759,R01787,R02531,R02577,R04285,R11764	RC00099,RC00108,RC00133,RC00205,RC00670	ko00000,ko00001,ko01000,ko03016	-	-	-	TRM,zf-CCCH
LOC119646381	1172.6	382.382	421.602	1730.65	1051.89	595.033	322.586	243.625	611.678	636.829	562.938	1006.91	431.309	1019.16	251.614	484.595	225.24	168.658	219.895	210.005	147.225	195.149	449.733	212.003	246.178	257.452	227.113	181.888	XP_037902753.1	7213.XP_004521762.1	4.21e-75	231	COG1186@1|root,KOG3429@2759|Eukaryota,3A880@33154|Opisthokonta,3BQKR@33208|Metazoa,3D7ZM@33213|Bilateria,41ZP2@6656|Arthropoda,3SMWT@50557|Insecta,452YI@7147|Diptera	33208|Metazoa	J	Translation release factor activity. It is involved in the biological process described with translational termination	-	GO:0000313,GO:0000315,GO:0003674,GO:0003676,GO:0003723,GO:0003747,GO:0003824,GO:0004045,GO:0005488,GO:0005575,GO:0005622,GO:0005623,GO:0005737,GO:0005739,GO:0005759,GO:0005761,GO:0005762,GO:0005840,GO:0006412,GO:0006414,GO:0006415,GO:0006417,GO:0006518,GO:0006807,GO:0008079,GO:0008135,GO:0008150,GO:0008152,GO:0009058,GO:0009059,GO:0009889,GO:0009987,GO:0010467,GO:0010468,GO:0010556,GO:0010608,GO:…	3.1.1.29	ko:K15033	-	-	-	-	ko00000,ko01000,ko03012	-	-	-	RF-1
LOC119646382	187.509	276.438	292.495	86.6626	190.968	135.299	199.993	196.772	300.618	226.746	150.288	194.856	200.529	144.098	251.064	329.481	145.348	185.08	220.34	141.099	160.753	210.096	170.137	226.122	226.008	191.218	238.946	215.191	XP_037902754.1	7213.XP_004520259.1	0	2032	COG5161@1|root,KOG1896@2759|Eukaryota,38EZW@33154|Opisthokonta,3BBGG@33208|Metazoa,3CTTJ@33213|Bilateria,41W7M@6656|Arthropoda,3SFV0@50557|Insecta,450PT@7147|Diptera	33208|Metazoa	A	nucleic acid binding	CPSF1	GO:0000375,GO:0000377,GO:0000398,GO:0003674,GO:0003676,GO:0003723,GO:0003729,GO:0003730,GO:0005488,GO:0005515,GO:0005575,GO:0005622,GO:0005623,GO:0005634,GO:0005654,GO:0005847,GO:0005849,GO:0006139,GO:0006351,GO:0006353,GO:0006366,GO:0006369,GO:0006378,GO:0006379,GO:0006396,GO:0006397,GO:0006403,GO:0006405,GO:0006406,GO:0006611,GO:0006725,GO:0006807,GO:0006810,GO:0006886,GO:0006913,GO:0008092,GO:…	-	ko:K14401	ko03015,map03015	-	-	-	ko00000,ko00001,ko03019,ko03021	-	-	-	CPSF_A,MMS1_N
LOC119646383	26.5836	151.077	150.958	64.9972	97.1986	86.5389	170.028	229.196	126.708	94.1436	96.0332	59.6868	154.321	102.467	132.824	165.893	162.79	142.961	167.641	86.7294	148.887	153.654	106.47	106.307	148.736	162.59	109.994	180.531	XP_037902755.1	7370.XP_005181860.1	0	1168	2C769@1|root,2QQKG@2759|Eukaryota,38XEP@33154|Opisthokonta,3BADN@33208|Metazoa,3CWAA@33213|Bilateria,41XTE@6656|Arthropoda,3SK3I@50557|Insecta,44Z9S@7147|Diptera	33208|Metazoa	S	Focadhesin	FOCAD	GO:0005575,GO:0005912,GO:0005924,GO:0005925,GO:0030054,GO:0030055,GO:0070161	-	-	-	-	-	-	-	-	-	-	DUF3730,Focadhesin
LOC119646384	130.066	400.127	396.884	238.325	272.317	230.335	449.223	438.373	365.232	338.147	294.931	216.818	332.605	226.26	374.736	341.769	399.709	389.337	363.965	398.538	354.382	501.996	231.273	426.163	383.914	300.284	451.392	493.204	XP_037902756.1	7159.AAEL001144-PA	0	996	KOG2063@1|root,KOG2063@2759|Eukaryota,38EJP@33154|Opisthokonta,3BEK3@33208|Metazoa,3CTQP@33213|Bilateria,41TXP@6656|Arthropoda,3SHQQ@50557|Insecta,458IF@7147|Diptera,45DE5@7148|Nematocera	33208|Metazoa	U	Vacuolar sorting protein 39 domain 2	VPS39	GO:0000323,GO:0003674,GO:0005488,GO:0005515,GO:0005575,GO:0005622,GO:0005623,GO:0005737,GO:0005764,GO:0005765,GO:0005768,GO:0005770,GO:0005773,GO:0005774,GO:0006810,GO:0006906,GO:0006914,GO:0006996,GO:0007034,GO:0007041,GO:0008150,GO:0008152,GO:0008333,GO:0009056,GO:0009987,GO:0010008,GO:0012505,GO:0016020,GO:0016043,GO:0016050,GO:0016192,GO:0016197,GO:0030897,GO:0031090,GO:0031410,GO:0031902,GO:…	-	ko:K20183	ko04138,map04138	-	-	-	ko00000,ko00001,ko04131	-	-	-	CNH,Clathrin,Vps39_1,Vps39_2
LOC119646386	14162.3	3787.14	3182.74	11548.3	9127.34	10760.9	3196.14	4999.27	1743.81	3307.74	5157.95	4439.67	3675.98	7986.17	3290.66	2447.57	4972.71	4410.54	3348.85	4444.94	6517.68	7341.78	8489.69	4853.32	13270.7	6178.37	4800.31	7187.24	XP_037902757.1	7213.XP_004517560.1	1.31e-33	124	29NDY@1|root,2RVQQ@2759|Eukaryota,39IKI@33154|Opisthokonta,3CNCW@33208|Metazoa,3DQ2M@33213|Bilateria,4269A@6656|Arthropoda,3SVX4@50557|Insecta,454MP@7147|Diptera	33208|Metazoa	S	Domain of unknown function (DUF4728)	-	GO:0005575,GO:0016020,GO:0016021,GO:0031224,GO:0044425	-	-	-	-	-	-	-	-	-	-	DUF4728
LOC119646388	1549.29	959.813	994.913	2987.21	2202.54	2385.27	1428.76	1383.26	1429.85	2635.49	1231	2879.63	754.837	2375.22	744.004	1319.45	3245.7	2154.42	1146.91	2830.77	2361.12	4782	2223.51	2201.46	3008.7	1046.15	1704.91	2069.36	XP_037902759.1	43151.ADAC008979-PA	5.74e-87	262	KOG4189@1|root,KOG4189@2759|Eukaryota,39SYP@33154|Opisthokonta,3BHDS@33208|Metazoa,3CYJ6@33213|Bilateria,41ZMB@6656|Arthropoda,3SMQ8@50557|Insecta,452Z5@7147|Diptera,45C64@7148|Nematocera	33208|Metazoa	S	Glycolipid transfer protein (GLTP)	GLTPD1	GO:0001817,GO:0001818,GO:0002791,GO:0002792,GO:0003674,GO:0005215,GO:0005319,GO:0005488,GO:0005543,GO:0005548,GO:0005575,GO:0005622,GO:0005623,GO:0005737,GO:0005829,GO:0006629,GO:0006643,GO:0006664,GO:0006665,GO:0006687,GO:0006807,GO:0006810,GO:0006811,GO:0006820,GO:0006869,GO:0008150,GO:0008152,GO:0008289,GO:0009892,GO:0009894,GO:0009895,GO:0009987,GO:0010506,GO:0010507,GO:0010876,GO:0015711,GO:…	-	-	-	-	-	-	-	-	-	-	GLTP
LOC119646389	1749.13	1125.87	959.19	3042.65	3454.12	1954.24	1445.09	2115.41	1005.65	1144.23	1467.85	1059.73	1459.78	1412.44	1112.85	947.212	1372.44	1712.17	2514.4	1632.34	2033.46	1776.94	2694.23	1918.57	1550.94	2363.82	1604.85	1390.57	XP_037902762.1	7370.XP_005179404.1	4.41e-60	211	2CMXY@1|root,2S3ZC@2759|Eukaryota,3A7ME@33154|Opisthokonta,3BTII@33208|Metazoa,3D9XX@33213|Bilateria,420CT@6656|Arthropoda,3SZ5Y@50557|Insecta,458NI@7147|Diptera	33208|Metazoa	-	-	-	-	-	-	-	-	-	-	-	-	-	-	-
LOC119646391	0	24.2455	85.4602	0	0	12.1721	34.2973	0	0	35.4729	42.8163	0	19.8244	0	6.93627	0	15.9884	0	7.17296	0	10.5254	0	23.8023	0	0	12.9541	26.5725	6.44296	XP_037902763.1	13735.ENSPSIP00000000006	1.04e-43	163	COG2801@1|root,KOG0017@2759|Eukaryota,38F42@33154|Opisthokonta,3BA5H@33208|Metazoa,3CZSS@33213|Bilateria,48AQP@7711|Chordata,48YUZ@7742|Vertebrata,4CJ7F@8459|Testudines	33208|Metazoa	L	Integrase core domain	-	-	-	-	-	-	-	-	-	-	-	-	RVT_1,rve,zf-H2C2
LOC119646392	118.88	226.86	214.278	67.8866	206.413	146.245	292.438	318.061	197.937	179.196	231.428	114.114	248.421	143.014	312.863	188.933	248.546	199.136	235.861	188.235	235.817	272.47	120.185	203.621	217.717	203.268	247.316	208.726	XP_037902764.1	132113.XP_003489124.1	3.23e-58	214	2C99P@1|root,2S366@2759|Eukaryota,3A4GZ@33154|Opisthokonta,3BRWW@33208|Metazoa,3D8G6@33213|Bilateria,42036@6656|Arthropoda,3SN3C@50557|Insecta,46FRW@7399|Hymenoptera	33208|Metazoa	A	Nucleic acid binding	Pof	GO:0003674,GO:0003676,GO:0003682,GO:0003723,GO:0003729,GO:0005488,GO:0005515,GO:0005575,GO:0005622,GO:0005623,GO:0005694,GO:0005700,GO:0008150,GO:0009893,GO:0010468,GO:0010604,GO:0010628,GO:0019222,GO:0030849,GO:0043226,GO:0043228,GO:0043229,GO:0043232,GO:0044424,GO:0044464,GO:0048518,GO:0050789,GO:0060255,GO:0065007,GO:0097159,GO:1901363	-	-	-	-	-	-	-	-	-	-	RRM_1
LOC119646393	0	0.690783	14.8156	2.89833	60.0148	7.31602	4.40242	36.4437	17.4665	14.2535	0	33.5085	6.63428	0	0	20.026	0	0	16.7608	0	0	0	0	0	0	0	9.91092	0	XP_037902765.1	7244.FBpp0229516	2.17e-14	72.8	2C51N@1|root,2T2AN@2759|Eukaryota,3AVBD@33154|Opisthokonta,3C3FV@33208|Metazoa,3DK8J@33213|Bilateria,4239P@6656|Arthropoda,3SRYM@50557|Insecta,4547I@7147|Diptera,45U9U@7214|Drosophilidae	33208|Metazoa	S	odorant binding	Obp28a	GO:0003008,GO:0003674,GO:0005488,GO:0005549,GO:0005550,GO:0005575,GO:0005576,GO:0005615,GO:0007600,GO:0007606,GO:0007608,GO:0008150,GO:0032501,GO:0044421,GO:0050877	-	-	-	-	-	-	-	-	-	-	PBP_GOBP
LOC119646394	120.294	167.038	188.681	157.439	143.998	134.063	118.038	115.098	140.791	103.262	83.535	125.523	153.505	67.2398	143.232	114.435	122.093	121.266	118.535	158.803	158.096	108.512	100.137	102.709	145.419	149.672	162.345	133.781	XP_037902766.1	7213.XP_004530267.1	1.16e-91	296	28KW1@1|root,2QTCH@2759|Eukaryota,38E8X@33154|Opisthokonta,3BAWS@33208|Metazoa,3CZS7@33213|Bilateria,41ZCF@6656|Arthropoda,3SMFM@50557|Insecta,44YKI@7147|Diptera	33208|Metazoa	S	family with sequence similarity	FAM122B	-	-	-	-	-	-	-	-	-	-	-	-
LOC119646395	0	21.5902	8.08741	0	0	3.65668	8.81037	11.5144	1.65611	13.1572	4.17298	0.877617	9.90124	0	7.65063	8.44749	4.36005	11.4863	10.7775	5.87706	10.5411	6.77371	6.36597	4.50379	13.2929	12.0066	12.1352	4.83552	XP_037902770.1	7213.XP_004533328.1	0	2516	KOG3594@1|root,KOG1219@2759|Eukaryota,3ARS9@33154|Opisthokonta,3C2BJ@33208|Metazoa,3CV8B@33213|Bilateria,41UNS@6656|Arthropoda,3SFU9@50557|Insecta,44YT1@7147|Diptera	33208|Metazoa	T	calcium ion binding. It is involved in the biological process described with homophilic cell adhesion via plasma membrane adhesion molecules	FAT4	GO:0000226,GO:0000902,GO:0000904,GO:0001654,GO:0001736,GO:0001737,GO:0001738,GO:0001745,GO:0002009,GO:0002164,GO:0002165,GO:0002168,GO:0003002,GO:0003674,GO:0005488,GO:0005509,GO:0005515,GO:0005575,GO:0005623,GO:0005886,GO:0005887,GO:0006464,GO:0006807,GO:0006996,GO:0007010,GO:0007017,GO:0007155,GO:0007157,GO:0007163,GO:0007164,GO:0007275,GO:0007389,GO:0007399,GO:0007423,GO:0007424,GO:0007444,GO:…	-	ko:K16496,ko:K16506,ko:K16669	ko04391,ko04392,map04391,map04392	-	-	-	ko00000,ko00001,ko04147,ko04516	-	-	-	Cadherin,EGF,Laminin_G_1,Laminin_G_2
LOC119646396	171202	48622.1	38986	162068	54199	43661.6	35275.3	60005.2	15418.8	42518	25027.4	40636.5	6438.69	47338.9	11546.6	13759.9	118023	221040	110576	130924	116046	96815.8	293731	68487.4	39610.8	2254.43	51249.5	59214.5	XP_037902767.1	7370.XP_005178936.1	1.45e-72	230	COG5640@1|root,KOG3627@2759|Eukaryota,3A0SR@33154|Opisthokonta,3BQSN@33208|Metazoa,3D7GV@33213|Bilateria,41Z8W@6656|Arthropoda,3SM0S@50557|Insecta,44WVM@7147|Diptera	33208|Metazoa	O	activity. It is involved in the biological process described with proteolysis	-	GO:0003674,GO:0003824,GO:0004175,GO:0004252,GO:0005575,GO:0005622,GO:0005623,GO:0005737,GO:0006508,GO:0006807,GO:0008150,GO:0008152,GO:0008233,GO:0008236,GO:0016787,GO:0017171,GO:0019538,GO:0043170,GO:0044238,GO:0044424,GO:0044464,GO:0070011,GO:0071704,GO:0140096,GO:1901564	-	ko:K09640	-	-	-	-	ko00000,ko01000,ko01002	-	-	-	Trypsin
LOC119646398	1955.99	825.024	494.843	1534.04	1029.56	1004.66	494.528	435.485	505.312	589.639	916.851	693.731	499.594	1576.54	581.761	404.745	462.216	418.851	462.911	402.514	460.713	465.549	667.898	462.426	608.513	511.424	463.759	494.62	XP_037902771.1	7260.FBpp0253723	7.4e-115	335	KOG3972@1|root,KOG3972@2759|Eukaryota,38GFG@33154|Opisthokonta,3BA9Y@33208|Metazoa,3CRWC@33213|Bilateria,41UER@6656|Arthropoda,3SH25@50557|Insecta,44X42@7147|Diptera,45XX7@7214|Drosophilidae	33208|Metazoa	S	It is involved in the biological process described with	APH1A	GO:0000003,GO:0001655,GO:0001656,GO:0001822,GO:0003006,GO:0003674,GO:0003824,GO:0004175,GO:0005575,GO:0005622,GO:0005623,GO:0005737,GO:0005768,GO:0005770,GO:0005783,GO:0005794,GO:0005886,GO:0005887,GO:0006508,GO:0006509,GO:0006518,GO:0006807,GO:0007154,GO:0007165,GO:0007166,GO:0007219,GO:0007220,GO:0007275,GO:0007276,GO:0007281,GO:0007292,GO:0007389,GO:0008104,GO:0008150,GO:0008152,GO:0008233,GO:…	-	ko:K06172	ko04330,ko05010,map04330,map05010	M00682	-	-	ko00000,ko00001,ko00002	-	-	-	Aph-1
LOC119646399	738.968	511.019	1843.65	595.134	1534.12	243.508	930.742	1631.53	209.592	889.682	179.487	223.948	1809.53	460.736	383.07	262.661	5322.77	632.165	649.358	5826.25	4067.91	3812.57	513.023	1833.7	1336.03	727.078	1846.16	3351.64	XP_037902772.1	7370.XP_005183199.1	2.09e-135	395	COG1052@1|root,KOG0069@2759|Eukaryota,38CKW@33154|Opisthokonta,3BDXZ@33208|Metazoa,3D594@33213|Bilateria,41UNK@6656|Arthropoda,3SIIN@50557|Insecta,451ZC@7147|Diptera	33208|Metazoa	E	Oxidoreductase activity, acting on the CH-OH group of donors, NAD or NADP as acceptor. It is involved in the biological process described with oxidation-reduction process	-	GO:0003674,GO:0003824,GO:0005575,GO:0005622,GO:0005623,GO:0005737,GO:0005829,GO:0008150,GO:0008152,GO:0016491,GO:0016614,GO:0016616,GO:0016618,GO:0030267,GO:0044424,GO:0044444,GO:0044464,GO:0055114	1.1.1.79,1.1.1.81	ko:K00049	ko00260,ko00620,ko00630,ko01100,ko01110,ko01120,map00260,map00620,map00630,map01100,map01110,map01120	-	R00465,R01388,R01392,R02527	RC00031,RC00042,RC00670	ko00000,ko00001,ko01000	-	-	-	2-Hacid_dh,2-Hacid_dh_C
LOC119646400	2498.77	2167.72	3103.81	1906.74	1411.81	781.681	2303.19	2112.88	1067.01	2725.72	936.752	489.165	3652.01	3113.23	1136.08	997.652	11870.9	2111.02	1282.02	11114.4	8738.83	7313.68	1082.61	4109.98	4823.62	1348.66	3046.26	6688.08	XP_037902773.1	7370.XP_005183199.1	2.99e-132	387	COG1052@1|root,KOG0069@2759|Eukaryota,38CKW@33154|Opisthokonta,3BDXZ@33208|Metazoa,3D594@33213|Bilateria,41UNK@6656|Arthropoda,3SIIN@50557|Insecta,451ZC@7147|Diptera	33208|Metazoa	E	Oxidoreductase activity, acting on the CH-OH group of donors, NAD or NADP as acceptor. It is involved in the biological process described with oxidation-reduction process	-	GO:0003674,GO:0003824,GO:0005575,GO:0005622,GO:0005623,GO:0005737,GO:0005829,GO:0008150,GO:0008152,GO:0016491,GO:0016614,GO:0016616,GO:0016618,GO:0030267,GO:0044424,GO:0044444,GO:0044464,GO:0055114	1.1.1.79,1.1.1.81	ko:K00049	ko00260,ko00620,ko00630,ko01100,ko01110,ko01120,map00260,map00620,map00630,map01100,map01110,map01120	-	R00465,R01388,R01392,R02527	RC00031,RC00042,RC00670	ko00000,ko00001,ko01000	-	-	-	2-Hacid_dh,2-Hacid_dh_C
LOC119646401	32.1277	122.994	130.667	287.443	122.9	163.244	184.881	162.019	63.778	74.9449	136.395	32.485	99.0659	146.175	81.2841	48.3852	270.351	194.066	104.113	104.548	230.452	173.355	159.616	174.832	68.1537	36.0509	66.7769	103.939	XP_037902774.1	7176.CPIJ010546-PA	7.1e-153	454	COG2124@1|root,KOG0158@2759|Eukaryota,38BTY@33154|Opisthokonta,3BF8S@33208|Metazoa,3CV2F@33213|Bilateria,41TTZ@6656|Arthropoda,3SI58@50557|Insecta,455KG@7147|Diptera,45BKE@7148|Nematocera	33208|Metazoa	Q	Cytochrome p450	-	GO:0003674,GO:0003824,GO:0007275,GO:0007444,GO:0008150,GO:0008152,GO:0009888,GO:0016491,GO:0032501,GO:0032502,GO:0035220,GO:0035295,GO:0048513,GO:0048731,GO:0048856,GO:0055114,GO:0060429	-	ko:K14999,ko:K15003	-	-	-	-	ko00000,ko00199,ko01000	-	-	-	p450
LOC119646402	180.196	94.5043	118.544	205.11	112.515	108.424	133.819	109.755	108.505	150.902	136.394	151.011	101.542	106.697	91.7055	132.099	142.443	52.3467	62.2288	116.327	114.568	143.894	103.978	83.8112	84.7764	87.8161	88.7828	101.522	XP_037902775.1	43151.ADAC008190-PA	4.22e-83	271	COG5062@1|root,KOG0411@2759|Eukaryota,38CY0@33154|Opisthokonta,3BE2R@33208|Metazoa,3CXHN@33213|Bilateria,41Z2V@6656|Arthropoda,3SKY4@50557|Insecta,453DN@7147|Diptera,45GKA@7148|Nematocera	33208|Metazoa	I	acetyltransferase, which acetylates the inositol ring of phosphatidylinositol during biosynthesis of GPI- anchor	PIGW	GO:0003674,GO:0003824,GO:0005575,GO:0005622,GO:0005623,GO:0005737,GO:0005783,GO:0005789,GO:0006464,GO:0006497,GO:0006505,GO:0006506,GO:0006629,GO:0006643,GO:0006644,GO:0006650,GO:0006661,GO:0006664,GO:0006793,GO:0006796,GO:0006807,GO:0008104,GO:0008150,GO:0008152,GO:0008374,GO:0008610,GO:0008654,GO:0009058,GO:0009059,GO:0009247,GO:0009987,GO:0012505,GO:0016020,GO:0016254,GO:0016740,GO:0016746,GO:…	-	ko:K05283	ko00563,ko01100,map00563,map01100	M00065	R05918	RC00004	ko00000,ko00001,ko00002,ko01000	-	-	-	GWT1
LOC119646404	65.7678	272.955	240.601	410.203	289.923	215.746	241.4	267.944	242.648	248.003	191.2	200.122	374.651	213.479	285.837	238.087	158.429	182.527	277.819	191.073	392.657	228.17	211.991	203.6	191.941	383.361	219.224	278.861	XP_037902776.1	7165.AGAP008989-PA	4.97e-135	385	COG1100@1|root,KOG0395@2759|Eukaryota,3A184@33154|Opisthokonta,3BQ4A@33208|Metazoa,3D74F@33213|Bilateria,41Z5A@6656|Arthropoda,3SM21@50557|Insecta,4524B@7147|Diptera,45FGT@7148|Nematocera	33208|Metazoa	S	Ras family	-	-	-	ko:K07852,ko:K17198	-	-	-	-	ko00000,ko04031	-	-	-	Ras
LOC119646405	1826.02	1599.95	1089.19	1245.1	742.817	1091.6	792.408	537.349	1388.18	1239.57	1210.54	1571.53	1049.23	1667.74	1482.73	1339.43	921.517	966.473	1023.25	893.641	1355.14	1294.65	1162.62	1311.19	1469.42	1262.62	1186.01	1290.01	XP_037902777.1	7159.AAEL010496-PA	1.21e-271	754	KOG1872@1|root,KOG1872@2759|Eukaryota,38F2F@33154|Opisthokonta,3BDEN@33208|Metazoa,3CTZU@33213|Bilateria,41UT6@6656|Arthropoda,3SIJ2@50557|Insecta,44Z1W@7147|Diptera,45D2A@7148|Nematocera	33208|Metazoa	O	Ubiquitin homologues	USP14	GO:0000966,GO:0003674,GO:0003824,GO:0004175,GO:0004197,GO:0004843,GO:0004857,GO:0004866,GO:0005488,GO:0005575,GO:0005622,GO:0005623,GO:0005634,GO:0005737,GO:0005829,GO:0006139,GO:0006396,GO:0006399,GO:0006464,GO:0006508,GO:0006725,GO:0006807,GO:0007154,GO:0007267,GO:0007268,GO:0008033,GO:0008150,GO:0008152,GO:0008192,GO:0008193,GO:0008233,GO:0008234,GO:0009892,GO:0009894,GO:0009895,GO:0009986,GO:…	3.4.19.12	ko:K11843	-	-	-	-	ko00000,ko01000,ko01002,ko04121	-	-	-	UCH
LOC119646406	3977.73	1342.58	1132.57	3853.83	2463.23	2042.46	1226.84	1222.22	1332.82	1900.41	1613.33	2416.5	1161.76	2498.36	1018.67	1217.31	1469.5	1177.31	1038.41	1441.38	1349.41	1471.71	2281.09	1383.56	1864.5	1350.95	1139.19	1268.85	XP_037902778.1	7176.CPIJ006347-PA	2.61e-93	280	KOG3306@1|root,KOG3306@2759|Eukaryota,38R38@33154|Opisthokonta,3BFBF@33208|Metazoa,3CVA1@33213|Bilateria,41U74@6656|Arthropoda,3SKX2@50557|Insecta,4502S@7147|Diptera,45G6D@7148|Nematocera	33208|Metazoa	S	Protein of unknown function (DUF2012)	EMC7	GO:0003674,GO:0003779,GO:0005488,GO:0005515,GO:0005575,GO:0005622,GO:0005623,GO:0005737,GO:0005783,GO:0005789,GO:0008092,GO:0012505,GO:0016020,GO:0016021,GO:0030176,GO:0031224,GO:0031227,GO:0031984,GO:0032991,GO:0042175,GO:0043226,GO:0043227,GO:0043229,GO:0043231,GO:0044422,GO:0044424,GO:0044425,GO:0044432,GO:0044444,GO:0044446,GO:0044464,GO:0072546,GO:0098796,GO:0098827	-	-	-	-	-	-	-	-	-	-	DUF2012
LOC119646407	0	13.9923	13.5402	10.1556	6.97802	13.3176	7.96534	5.25756	19.7396	16.0846	1.65797	6.17126	17.406	5.36105	16.5799	19.8324	1.45996	0	74.935	1.45939	2.64724	0	51.4887	1.80971	0	2.78338	32.7618	0	XP_037902779.1	7370.XP_005182600.1	3.81E-313	897	COG0457@1|root,KOG1124@2759|Eukaryota,38CY4@33154|Opisthokonta,3BDZ9@33208|Metazoa,3CW1H@33213|Bilateria,41VA9@6656|Arthropoda,3SKNK@50557|Insecta,44XMA@7147|Diptera	33208|Metazoa	S	Tetratricopeptide repeat	-	-	-	-	-	-	-	-	-	-	-	-	DUF1736,PMT_2,TPR_1,TPR_11,TPR_16,TPR_2,TPR_7,TPR_8
LOC119646408	13.9978	4.87611	9.43628	1.44433	0	0	0.881133	0	4.96863	0	2.50365	0.877663	7.42627	0	2.0868	8.44807	1.45345	0	7.18578	2.93843	1.31777	0	23.6434	0	0	6.46532	6.82641	0	XP_037902781.1	7217.FBpp0114479	0	1065	KOG3509@1|root,KOG3509@2759|Eukaryota,38GWR@33154|Opisthokonta,3BDA1@33208|Metazoa,3CYUY@33213|Bilateria,41YBP@6656|Arthropoda,3SIQT@50557|Insecta,44Z6G@7147|Diptera,45TIC@7214|Drosophilidae	33208|Metazoa	O	Laminin G domain	EGFLAM	GO:0001654,GO:0001745,GO:0001751,GO:0001754,GO:0003674,GO:0005488,GO:0005539,GO:0005575,GO:0005576,GO:0005604,GO:0005614,GO:0005615,GO:0005623,GO:0006022,GO:0006029,GO:0006082,GO:0006464,GO:0006790,GO:0006807,GO:0006996,GO:0007275,GO:0007399,GO:0007423,GO:0008150,GO:0008152,GO:0009100,GO:0009653,GO:0009887,GO:0009986,GO:0009987,GO:0010810,GO:0010811,GO:0016043,GO:0018149,GO:0018193,GO:0018209,GO:…	-	-	-	-	-	-	-	-	-	-	EGF,Laminin_G_1,Laminin_G_2,fn3,hEGF
LOC119646410	89.2169	86.0172	212.211	99.2745	20.7552	72.8524	135.156	60.4746	115.72	36.2987	184.613	118.906	56.7179	322.171	205.071	111.598	52.122	34.3287	69.1874	54.1653	30.189	46.1239	43.4962	48.0948	86.0777	43.2464	89.1604	36.1277	XP_037902782.1	7370.XP_005179020.1	0	957	KOG3640@1|root,KOG3640@2759|Eukaryota,38FZE@33154|Opisthokonta,3BIFS@33208|Metazoa,3CVII@33213|Bilateria,41X67@6656|Arthropoda,3SJFX@50557|Insecta,44YBA@7147|Diptera	33208|Metazoa	DZ	Anillin N-terminus	ANLN	GO:0000003,GO:0000278,GO:0000280,GO:0000281,GO:0000910,GO:0000912,GO:0000915,GO:0000921,GO:0001667,GO:0002244,GO:0002376,GO:0002520,GO:0003006,GO:0003674,GO:0003779,GO:0005488,GO:0005515,GO:0005575,GO:0005576,GO:0005622,GO:0005623,GO:0005634,GO:0005654,GO:0005737,GO:0005826,GO:0005856,GO:0005886,GO:0005938,GO:0006928,GO:0006949,GO:0006996,GO:0007009,GO:0007010,GO:0007015,GO:0007049,GO:0007088,GO:…	-	ko:K18621	-	-	-	-	ko00000,ko04812	-	-	-	Anillin,Anillin_N,PH
LOC119646411	1238.17	2196.71	1600.41	1050.12	600.439	1685.83	1389.8	310.696	3133.72	1341.34	3254.79	1747.92	1993.89	3324.46	2124.86	2563.01	934.733	1118.36	1440.43	1414.47	766.9	1498.88	1194.38	1530.03	1189.96	1675.07	1473.94	1254.2	XP_037902785.1	7159.AAEL001176-PA	1.61e-188	532	KOG0788@1|root,KOG0788@2759|Eukaryota,38CW7@33154|Opisthokonta,3BCGR@33208|Metazoa,3CS4V@33213|Bilateria,41WK6@6656|Arthropoda,3SJ65@50557|Insecta,44ZF5@7147|Diptera,45EMB@7148|Nematocera	33208|Metazoa	T	S-adenosylmethionine decarboxylase	AMD 1.00	GO:0001701,GO:0003674,GO:0003824,GO:0004014,GO:0005488,GO:0005575,GO:0005622,GO:0005623,GO:0005737,GO:0005829,GO:0006576,GO:0006595,GO:0006596,GO:0006597,GO:0006732,GO:0006790,GO:0006807,GO:0006950,GO:0006952,GO:0007275,GO:0008150,GO:0008152,GO:0008215,GO:0008216,GO:0008295,GO:0009058,GO:0009308,GO:0009309,GO:0009605,GO:0009607,GO:0009617,GO:0009790,GO:0009792,GO:0009987,GO:0016829,GO:0016830,GO:…	4.1.1.50	ko:K01611,ko:K15203	ko00270,ko00330,ko01100,map00270,map00330,map01100	M00034,M00133	R00178	RC00299	ko00000,ko00001,ko00002,ko01000,ko03021	-	-	-	SAM_decarbox
LOC119646412	40.464	14.573	10.1005	1.44476	0	6.08991	3.52035	0	6.62839	1.01335	15.0897	3.51329	0.825951	8.53487	2.77731	3.07267	1.45379	0	3.58905	2.94964	1.31655	0	0	0.901605	0	3.7001	3.79588	3.22287	XP_037902786.1	7159.AAEL001162-PA	2.21e-24	102	2FA3D@1|root,2TB9M@2759|Eukaryota,396EX@33154|Opisthokonta,3CATE@33208|Metazoa,3DS11@33213|Bilateria,42CIP@6656|Arthropoda,3SS4F@50557|Insecta,454W6@7147|Diptera,45J7Z@7148|Nematocera	33208|Metazoa	S	Protein phosphatase 1 regulatory subunit 35 C-terminus	-	GO:0000226,GO:0005575,GO:0005622,GO:0005623,GO:0005737,GO:0005814,GO:0005815,GO:0005856,GO:0006996,GO:0007010,GO:0007017,GO:0007049,GO:0007098,GO:0007099,GO:0008150,GO:0009987,GO:0015630,GO:0016043,GO:0022402,GO:0022607,GO:0031023,GO:0043226,GO:0043228,GO:0043229,GO:0043232,GO:0044085,GO:0044422,GO:0044424,GO:0044430,GO:0044444,GO:0044446,GO:0044450,GO:0044464,GO:0051298,GO:0070925,GO:0071840,GO:…	-	ko:K16721	-	-	-	-	ko00000,ko03036	-	-	-	PPP1R35_C
LOC119646413	463.358	240.728	285.819	355.376	137.589	81.5355	100.217	110.403	74.59	99.3681	100.087	136.182	74.3602	318.775	117.165	92.1608	159.847	84.3231	152.991	167.056	126.209	112.91	253.182	176.803	101.457	120.371	139.748	75.6581	XP_037902790.1	7222.FBpp0156264	4.72e-30	127	2D6A8@1|root,2T1B4@2759|Eukaryota,3AU7H@33154|Opisthokonta,3C3S7@33208|Metazoa,3DKN4@33213|Bilateria,423NJ@6656|Arthropoda,3SQ18@50557|Insecta,454TV@7147|Diptera,45YWY@7214|Drosophilidae	33208|Metazoa	S	Domain of unknown function (DUF4780)	-	-	-	-	-	-	-	-	-	-	-	-	DUF4780
LOC119646415	235.353	74.7811	543.623	2126.32	6745.34	7420.18	2840.4	5271.5	741.626	2604.29	171.376	1248.36	1316.1	161.01	1805.42	1003.9	9029.91	10583	3639.22	4399.94	3984.71	5369.13	14161	11198	996.082	2054.68	2820.88	190.78	XP_037902788.1	7213.XP_004520628.1	6.78e-29	108	2F6X0@1|root,2T7ZI@2759|Eukaryota,392DS@33154|Opisthokonta,3C7T9@33208|Metazoa,3DNTN@33213|Bilateria,421IY@6656|Arthropoda,3SPYK@50557|Insecta,4547X@7147|Diptera	33208|Metazoa	-	-	-	GO:0000003,GO:0005575,GO:0005576,GO:0005615,GO:0006950,GO:0006952,GO:0007610,GO:0007617,GO:0007618,GO:0008150,GO:0019098,GO:0019953,GO:0022414,GO:0032501,GO:0032504,GO:0044421,GO:0044703,GO:0045924,GO:0048609,GO:0050896,GO:0051704,GO:0060180,GO:0065007,GO:0065008	-	-	-	-	-	-	-	-	-	-	-
LOC119646416	11767.2	1154.47	971.643	5085.96	7040.59	3969.22	726.073	869.141	1054.49	1548.89	2521.33	2098.63	1427.64	3005.08	923.541	985.367	651.171	656.331	629.271	621.939	859.675	743.22	2460.96	575.959	1326.68	1069.85	632.969	787.899	XP_037902789.1	7165.AGAP005174-PA	5.92e-175	497	KOG2445@1|root,KOG2445@2759|Eukaryota,38GGF@33154|Opisthokonta,3BFZI@33208|Metazoa,3CUQR@33213|Bilateria,41XHY@6656|Arthropoda,3SIHM@50557|Insecta,44YZI@7147|Diptera,45FEB@7148|Nematocera	33208|Metazoa	U	Belongs to the WD repeat SEC13 family	SEH1L	GO:0000003,GO:0000070,GO:0000278,GO:0000280,GO:0000323,GO:0000819,GO:0003006,GO:0005575,GO:0005622,GO:0005623,GO:0005634,GO:0005635,GO:0005643,GO:0005737,GO:0005764,GO:0005765,GO:0005767,GO:0005773,GO:0005774,GO:0005776,GO:0006950,GO:0006996,GO:0006997,GO:0006999,GO:0007049,GO:0007059,GO:0007080,GO:0007154,GO:0007276,GO:0007281,GO:0007292,GO:0007293,GO:0007346,GO:0008150,GO:0008361,GO:0008608,GO:…	-	ko:K14299,ko:K16725	ko03013,ko04150,map03013,map04150	M00427	-	-	ko00000,ko00001,ko00002,ko01009,ko03019,ko03036	1.I.1	-	-	WD40
LOC119646417	318.763	327.624	355.738	205.106	376.172	240.059	251.001	288.687	260.061	238.954	228.19	215.074	251.743	197.428	273.174	253.447	196.221	208.083	220.266	189.779	217.347	178.746	245.049	227.062	232.688	217.157	207.882	261.093	XP_037902791.1	7213.XP_004537522.1	1.7e-291	827	COG5190@1|root,KOG0323@2759|Eukaryota,38IPM@33154|Opisthokonta,3BB6D@33208|Metazoa,3CTTC@33213|Bilateria,41U81@6656|Arthropoda,3SHZA@50557|Insecta,44X18@7147|Diptera	33208|Metazoa	L	Phosphoprotein phosphatase activity	CTDP1	GO:0000278,GO:0000280,GO:0000428,GO:0000922,GO:0001085,GO:0001091,GO:0001096,GO:0001098,GO:0001099,GO:0001558,GO:0003674,GO:0003824,GO:0004721,GO:0004722,GO:0005488,GO:0005515,GO:0005575,GO:0005622,GO:0005623,GO:0005634,GO:0005654,GO:0005694,GO:0005700,GO:0005813,GO:0005815,GO:0005819,GO:0005856,GO:0006139,GO:0006351,GO:0006354,GO:0006355,GO:0006357,GO:0006366,GO:0006368,GO:0006464,GO:0006470,GO:…	3.1.3.16	ko:K15732	-	-	-	-	ko00000,ko01000,ko01009,ko03021	-	-	-	BRCT,FCP1_C,NIF,PTCB-BRCT
LOC119646418	111.916	371.02	401.639	138.661	118	126.756	273.088	263.706	216.152	148.813	129.458	140.443	242.63	62.9725	328.904	251.911	280.522	262.951	332.871	207.298	306.984	238.446	248.476	234.242	250.115	256.831	237.442	298.998	XP_037902792.1	7159.AAEL009289-PA	2.23E-316	915	KOG2047@1|root,KOG4535@2759|Eukaryota,38HYB@33154|Opisthokonta,3BCDE@33208|Metazoa,3CVRY@33213|Bilateria,41VQD@6656|Arthropoda,3SFKB@50557|Insecta,44ZFT@7147|Diptera,45CBJ@7148|Nematocera	33208|Metazoa	S	Domain of unknown function (DUF4042)	HEATR6	-	-	-	-	-	-	-	-	-	-	-	DUF4042,HEAT,HEAT_2,HEAT_EZ
LOC119646419	854.802	479.418	479.548	1324.55	1235.74	886.854	657.626	954.283	318.893	549.948	813.44	467.966	627.43	704.185	662.049	331.016	515.992	559.224	381.736	449.156	587.305	474.817	547.323	791.265	307.527	463.131	437.093	356.128	XP_037902793.1	7237.FBpp0287503	6.01e-183	522	KOG2369@1|root,KOG2369@2759|Eukaryota,38DE3@33154|Opisthokonta,3BDIK@33208|Metazoa,3CTGA@33213|Bilateria,41TRY@6656|Arthropoda,3SFXH@50557|Insecta,450J2@7147|Diptera,45Q67@7214|Drosophilidae	33208|Metazoa	G	O-acyltransferase activity. It is involved in the biological process described with lipid metabolic process	PLA2G15	GO:0000323,GO:0003674,GO:0003824,GO:0004620,GO:0004622,GO:0004623,GO:0005488,GO:0005543,GO:0005575,GO:0005576,GO:0005615,GO:0005622,GO:0005623,GO:0005634,GO:0005654,GO:0005737,GO:0005764,GO:0005773,GO:0006082,GO:0006629,GO:0006631,GO:0006643,GO:0006644,GO:0006650,GO:0006665,GO:0006672,GO:0006793,GO:0006796,GO:0006807,GO:0008150,GO:0008152,GO:0008289,GO:0008374,GO:0009056,GO:0009062,GO:0009395,GO:…	3.1.1.5	ko:K06129	ko00564,ko04142,map00564,map04142	-	R02746	RC00020,RC00041	ko00000,ko00001,ko01000	-	-	-	LCAT
LOC119646420	1452.68	1188.89	1753.21	1749.22	3397.74	2369.45	2525.8	4876.14	694.934	1281.17	1589.11	2506.62	1943.36	756.475	4187.79	1966.9	2837.23	1106.95	374.564	1338.55	1605.24	1854.89	766.192	1645.6	1909.97	959.521	1363.62	1132.85	XP_037902794.1	7176.CPIJ016852-PA	6.6e-174	506	COG2124@1|root,KOG0158@2759|Eukaryota,38BTY@33154|Opisthokonta,3BF8S@33208|Metazoa,3CV2F@33213|Bilateria,41VYX@6656|Arthropoda,3SK5P@50557|Insecta,458DN@7147|Diptera,45MJX@7148|Nematocera	33208|Metazoa	Q	cytochrome P450	Cyp6a9	GO:0002118,GO:0003674,GO:0003824,GO:0004497,GO:0005575,GO:0005622,GO:0005623,GO:0005737,GO:0005783,GO:0005789,GO:0006082,GO:0006091,GO:0006629,GO:0006631,GO:0006805,GO:0006950,GO:0006952,GO:0007610,GO:0008150,GO:0008152,GO:0009055,GO:0009266,GO:0009404,GO:0009410,GO:0009605,GO:0009607,GO:0009617,GO:0009628,GO:0009636,GO:0009987,GO:0010033,GO:0010243,GO:0012505,GO:0014070,GO:0014074,GO:0016020,GO:…	-	ko:K14999,ko:K15003	-	-	-	-	ko00000,ko00199,ko01000	-	-	-	p450
LOC119646421	161.138	161.228	164.714	128.664	86.2972	92.24	129.578	128.02	107.915	95.6195	112.575	95.0817	140.725	68.1305	118.564	152.788	165.626	152.259	222.607	204.585	161.081	138.119	185.24	170.841	219.842	159.036	187.252	203.122	XP_037902827.1	7213.XP_004531209.1	1.38e-32	120	COG0666@1|root,KOG0504@2759|Eukaryota,3AB5M@33154|Opisthokonta,3BU9E@33208|Metazoa,3DB8W@33213|Bilateria,4210Z@6656|Arthropoda,3SP81@50557|Insecta,456YH@7147|Diptera	33208|Metazoa	S	protein ubiquitination	-	-	-	-	-	-	-	-	-	-	-	-	-
LOC119646422	0	7.64409	22.8992	5.77717	25.9678	18.2726	7.92314	15.6793	8.28196	3.0379	13.385	2.63361	12.3817	2.13379	13.1997	9.98328	14.5336	17.8724	10.7698	13.2495	13.168	22.6535	9.11836	3.60435	4.98627	5.54548	12.1398	12.085	XP_037902795.1	7213.XP_004530166.1	3.59e-17	92	2DJWY@1|root,2S61H@2759|Eukaryota,3A5YU@33154|Opisthokonta,3BTRR@33208|Metazoa,3D98S@33213|Bilateria,420H4@6656|Arthropoda,3SNQP@50557|Insecta,452YF@7147|Diptera	33208|Metazoa	S	Mab-21	-	-	2.7.7.86	ko:K17834	ko04623,map04623	-	-	-	ko00000,ko00001,ko01000	-	-	-	Mab-21
LOC119646425	323.033	459.914	436.623	166.106	100.583	383.878	412.21	204	274.962	289.56	508.888	700.5	90.7878	657.419	542.95	168.197	649.709	694.436	1160.09	554.487	234.49	757.659	756.759	604.57	1003.84	2025.38	1035.57	1354.67	XP_037902800.1	7370.XP_005184246.1	7.05e-97	317	2AMXB@1|root,2SF49@2759|Eukaryota,3ACI7@33154|Opisthokonta,3BVVK@33208|Metazoa,3DGYD@33213|Bilateria,422IH@6656|Arthropoda,3SNR1@50557|Insecta,44ZS8@7147|Diptera	33208|Metazoa	S	Transferase activity, transferring phosphorus-containing groups	-	-	-	-	-	-	-	-	-	-	-	-	EcKinase
LOC119646426	36.912	65.2628	17.7613	458.35	21.1334	448.278	29.5005	12.7434	107.379	25.726	2240.74	26.7213	34.1521	82.7518	31.3158	73.7844	11.7995	10.2191	49.1303	4.47535	1.337	37.8382	22.2691	36.5685	12.648	10.3121	24.6331	16.9371	XP_037902799.1	7159.AAEL008596-PA	9.02e-181	527	28PYH@1|root,2QWM3@2759|Eukaryota,39X3V@33154|Opisthokonta,3BGNW@33208|Metazoa,3D3TE@33213|Bilateria,41XVG@6656|Arthropoda,3SGKP@50557|Insecta,452JJ@7147|Diptera,45HNA@7148|Nematocera	33208|Metazoa	S	Spaetzle	-	GO:0003674,GO:0005102,GO:0005121,GO:0005488,GO:0005515,GO:0005575,GO:0005576,GO:0007154,GO:0007165,GO:0007166,GO:0008063,GO:0008150,GO:0009987,GO:0023052,GO:0050789,GO:0050794,GO:0050896,GO:0051716,GO:0065007	-	-	-	-	-	-	-	-	-	-	Spaetzle
LOC119646429	1154.38	2971.53	2864.72	1486.27	2998.39	2224.39	3662.78	5248.54	2700.17	2660.63	1859.49	1801.67	4041.62	1329.23	2889.87	2864.52	3969.11	3229.79	3343.27	3628.57	4073.37	3994.27	1863.32	3514.58	3637.81	3171.51	3569.68	4241.49	XP_037902807.1	7370.XP_005186163.1	1.36e-231	685	KOG3863@1|root,KOG3863@2759|Eukaryota,396KH@33154|Opisthokonta,3BHF0@33208|Metazoa,3CSNI@33213|Bilateria,41TJJ@6656|Arthropoda,3SJ5K@50557|Insecta,458X9@7147|Diptera	33208|Metazoa	K	Belongs to the bZIP family	NFE2L1	GO:0000003,GO:0000122,GO:0000226,GO:0000302,GO:0000303,GO:0000305,GO:0000578,GO:0000785,GO:0000902,GO:0000904,GO:0000976,GO:0000977,GO:0000978,GO:0000980,GO:0000981,GO:0000982,GO:0000987,GO:0000988,GO:0000989,GO:0001012,GO:0001067,GO:0001076,GO:0001077,GO:0001078,GO:0001085,GO:0001102,GO:0001158,GO:0001190,GO:0001205,GO:0001221,GO:0001227,GO:0001228,GO:0001666,GO:0001704,GO:0001706,GO:0001708,GO:…	-	ko:K05638,ko:K09039,ko:K09040,ko:K09041	ko04141,ko04212,ko05200,ko05225,ko05418,map04141,map04212,map05200,map05225,map05418	-	-	-	ko00000,ko00001,ko03000,ko03029	-	-	-	bZIP_Maf
LOC119646430	11781.7	6730.45	6129.27	10492.7	28059.6	11993.8	7662.47	10775.2	7883.72	12816.1	6258.07	17375.8	9437.84	6386.11	3602.28	6874.52	12555.4	8222.53	7407.7	7559.49	6876.42	8351.85	15903.1	8363.37	12132.1	16388.8	8238.4	7953.37	XP_037902808.1	7213.XP_004521794.1	8.38e-152	436	COG3648@1|root,KOG1599@2759|Eukaryota,38FJ4@33154|Opisthokonta,3BBA4@33208|Metazoa,3CS1C@33213|Bilateria,41V03@6656|Arthropoda,3SH53@50557|Insecta,452P3@7147|Diptera	33208|Metazoa	Q	Catalyzes the oxidation of uric acid to 5- hydroxyisourate, which is further processed to form (S)-allantoin	UOX	GO:0000255,GO:0003674,GO:0003824,GO:0004846,GO:0005575,GO:0005622,GO:0005623,GO:0005737,GO:0005777,GO:0005782,GO:0005829,GO:0006082,GO:0006139,GO:0006144,GO:0006145,GO:0006725,GO:0006807,GO:0008150,GO:0008152,GO:0009056,GO:0009058,GO:0009112,GO:0009636,GO:0009987,GO:0010033,GO:0016043,GO:0016491,GO:0016661,GO:0016663,GO:0017144,GO:0018130,GO:0019428,GO:0019439,GO:0019628,GO:0022607,GO:0031907,GO:…	1.7.3.3	ko:K00365	ko00230,ko00232,ko01100,ko01120,map00230,map00232,map01100,map01120	M00546	R02106,R07981	RC02107,RC02551	ko00000,ko00001,ko00002,ko01000	-	-	-	Uricase
LOC119646431	301.994	24.8479	9.95811	384.331	338.53	310.308	35.6237	69.2762	1.66588	69.574	105.341	158.228	52.2176	166.074	34.861	36.0075	31.9288	48.5977	41.3894	46.824	36.4575	26.1527	131.335	28.0548	80.948	83.323	20.5915	41.6045	NA	NA	NA	NA	NA	NA	NA	NA	NA	NA	NA	NA	NA	NA	NA	NA	NA	NA	NA	NA	NA
LOC119646432	36.0701	11.0284	2.68666	50.5694	78.72	69.3084	15.8061	17.6581	0	34.5081	28.7145	65.0532	9.09424	31.9672	8.30585	13.8233	7.26597	14.0615	11.9393	5.93232	3.93972	5.73329	37.778	7.22192	18.3046	36.1606	9.12076	16.8913	NA	NA	NA	NA	NA	NA	NA	NA	NA	NA	NA	NA	NA	NA	NA	NA	NA	NA	NA	NA	NA
LOC119646434	4.18842	7.63754	2.69575	11498.6	1.72816	13.4093	2.64242	6.27117	10.782	2.02889	1139.25	3.51693	2.48048	3.20342	0	7.68915	0	0	2.39469	0	0	0	0	0	0	0	0	0	XP_037902812.1	7165.AGAP009877-PA	1.34e-48	171	28PBF@1|root,2QVYU@2759|Eukaryota,3A08F@33154|Opisthokonta,3BQ4I@33208|Metazoa,3D74D@33213|Bilateria,422QA@6656|Arthropoda,3SMH2@50557|Insecta,453GT@7147|Diptera,45I6N@7148|Nematocera	33208|Metazoa	S	Insect cuticle protein	-	-	-	-	-	-	-	-	-	-	-	-	Chitin_bind_4
LOC119646436	0	49.8822	70.1716	18.9073	280.81	155.038	426.677	302.929	90.9761	80.2595	490.491	60.3693	265.752	322.562	214.693	101.244	91.6371	306.515	509.283	82.8436	131.965	186.735	174.254	159.208	35.7183	40.6824	113.042	65.4401	XP_037902815.1	7217.FBpp0119678	0	1092	COG4631@1|root,KOG0430@2759|Eukaryota,38GEI@33154|Opisthokonta,3BBFK@33208|Metazoa,3D3DE@33213|Bilateria,41V8S@6656|Arthropoda,3SGAH@50557|Insecta,44ZSP@7147|Diptera,45N4G@7214|Drosophilidae	33208|Metazoa	F	electron carrier activity. It is involved in the biological process described with oxidation-reduction process	-	GO:0000166,GO:0003674,GO:0003824,GO:0004031,GO:0004854,GO:0005488,GO:0005575,GO:0005622,GO:0005623,GO:0005737,GO:0005829,GO:0006081,GO:0006117,GO:0006139,GO:0006144,GO:0006145,GO:0006725,GO:0006807,GO:0008150,GO:0008152,GO:0009056,GO:0009112,GO:0009115,GO:0009987,GO:0016491,GO:0016623,GO:0016725,GO:0016726,GO:0016903,GO:0019439,GO:0034641,GO:0036094,GO:0043167,GO:0043168,GO:0044237,GO:0044238,GO:…	1.17.1.4,1.17.3.2	ko:K00106	ko00230,ko00232,ko00983,ko01100,ko01110,ko01120,ko04146,map00230,map00232,map00983,map01100,map01110,map01120,map04146	M00546	R01768,R01769,R02103,R02107,R07942,R07977,R07978,R07979,R08235	RC00143,RC02017,RC02199	ko00000,ko00001,ko00002,ko01000,ko04147	-	-	-	Ald_Xan_dh_C,Ald_Xan_dh_C2,CO_deh_flav_C,FAD_binding_5,Fer2,Fer2_2
LOC119646437	16468.1	4075.27	3102.2	7409.29	28969.2	14907.7	7426.74	9284.12	2528.62	6814.52	1744.31	5535.26	7056.36	6861.71	4662.95	2850.23	2635.82	2032.03	2120.04	509.433	1582.67	1599.33	5322.67	1938.65	1903.3	1529.68	1526.86	1486.53	XP_037902817.1	7217.FBpp0119049	4.92e-101	303	COG1877@1|root,KOG1050@2759|Eukaryota,38EGS@33154|Opisthokonta,3BMA5@33208|Metazoa,3CWD5@33213|Bilateria,41VGH@6656|Arthropoda,3SJ1W@50557|Insecta,4554D@7147|Diptera,45W57@7214|Drosophilidae	33208|Metazoa	G	Removes the phosphate from trehalose 6-phosphate to produce free trehalose	-	GO:0003674,GO:0003824,GO:0004805,GO:0005575,GO:0005622,GO:0005623,GO:0005737,GO:0005975,GO:0005984,GO:0005991,GO:0005992,GO:0006793,GO:0006796,GO:0006950,GO:0008150,GO:0008152,GO:0009058,GO:0009311,GO:0009312,GO:0009987,GO:0016051,GO:0016311,GO:0016787,GO:0016788,GO:0016791,GO:0019203,GO:0033554,GO:0034637,GO:0042578,GO:0044237,GO:0044238,GO:0044249,GO:0044262,GO:0044424,GO:0044464,GO:0046351,GO:…	2.4.1.15,3.1.3.12	ko:K01087,ko:K16055	ko00500,ko01100,map00500,map01100	-	R02737,R02778	RC00005,RC00017,RC00049,RC02748	ko00000,ko00001,ko01000,ko01003	-	GT20	-	Glyco_transf_20,Trehalose_PPase
LOC119646440	595.969	192.991	132.65	371.228	174.591	153.459	114.412	104.465	91.1185	83.0666	135.698	100.98	100.735	237.889	154.85	81.4099	133.723	150.675	112.455	104.638	138.233	112.333	225.548	81.1209	226.931	125.756	133.576	126.483	XP_037902818.1	7370.XP_005174780.1	1.2e-218	610	COG0673@1|root,KOG2742@2759|Eukaryota,38FYZ@33154|Opisthokonta,3BAMF@33208|Metazoa,3CUXE@33213|Bilateria,41YFT@6656|Arthropoda,3SIV2@50557|Insecta,44Y4S@7147|Diptera	33208|Metazoa	S	Oxidoreductase activity	GFOD1	GO:0005575,GO:0005576,GO:0008150,GO:0009987,GO:0016043,GO:0030198,GO:0031012,GO:0043062,GO:0044421,GO:0071840	-	-	-	-	-	-	-	-	-	-	GFO_IDH_MocA,GFO_IDH_MocA_C
LOC119646441	1046.65	381.859	288.049	499.802	75.8753	158.259	120.5	108.525	261.794	172.283	231.613	273.147	72.6853	226.08	129.045	149.763	66.8618	84.2941	154.242	63.4697	51.3185	96.6947	208.628	125.323	161.299	158.207	166.26	141.756	XP_037902819.1	7230.FBpp0173827	1.5e-103	311	COG2214@1|root,KOG0719@2759|Eukaryota,38CKR@33154|Opisthokonta,3BE6K@33208|Metazoa,3CVVW@33213|Bilateria,41YWI@6656|Arthropoda,3SM4V@50557|Insecta,4529B@7147|Diptera,45XH3@7214|Drosophilidae	33208|Metazoa	O	DnaJ domain	DNAJC9	GO:0003674,GO:0005488,GO:0005515,GO:0005575,GO:0005576,GO:0005615,GO:0005622,GO:0005623,GO:0005634,GO:0005654,GO:0005737,GO:0005829,GO:0005886,GO:0007610,GO:0008150,GO:0016020,GO:0031072,GO:0031974,GO:0031981,GO:0032781,GO:0035176,GO:0043085,GO:0043226,GO:0043227,GO:0043229,GO:0043231,GO:0043233,GO:0043462,GO:0044093,GO:0044421,GO:0044422,GO:0044424,GO:0044428,GO:0044444,GO:0044446,GO:0044464,GO:…	-	ko:K09529	-	-	-	-	ko00000,ko03110	-	-	-	DnaJ
LOC119646442	26.5382	11.8119	16.1646	0	1604.41	2108.73	858.351	1688.04	13.2527	392.965	2.5106	694.487	41.2783	12.8034	431.411	141.316	4133.76	3594.1	2096.57	3607.96	2577.04	7017.94	3144.35	6412.14	12114.1	1625.12	2355.45	3827.18	XP_037902820.1	7176.CPIJ016856-PA	1.75e-183	530	COG2124@1|root,KOG0158@2759|Eukaryota,38BTY@33154|Opisthokonta,3BF8S@33208|Metazoa,3CV2F@33213|Bilateria,41VYX@6656|Arthropoda,3SK5P@50557|Insecta,455FX@7147|Diptera,45FEX@7148|Nematocera	33208|Metazoa	Q	cytochrome P450	Cyp6a9	GO:0002118,GO:0003674,GO:0003824,GO:0004497,GO:0005575,GO:0005622,GO:0005623,GO:0005737,GO:0005783,GO:0005789,GO:0006082,GO:0006091,GO:0006629,GO:0006631,GO:0006805,GO:0006950,GO:0006952,GO:0007610,GO:0008150,GO:0008152,GO:0009055,GO:0009266,GO:0009404,GO:0009410,GO:0009605,GO:0009607,GO:0009617,GO:0009628,GO:0009636,GO:0009987,GO:0010033,GO:0010243,GO:0012505,GO:0014070,GO:0014074,GO:0016020,GO:…	-	ko:K14999,ko:K15003	-	-	-	-	ko00000,ko00199,ko01000	-	-	-	p450
LOC119646446	1315.9	805.951	602.221	1586.21	610.822	502.389	571.113	589.762	632.503	551.812	650.509	651.174	622.299	598.999	547.959	561.36	597.241	623.625	608.083	469.329	643.846	617.389	516.616	537.817	728.666	778.264	633.646	703.241	XP_037902825.1	7213.XP_004521752.1	2.27e-19	81.6	KOG4117@1|root,KOG4117@2759|Eukaryota,3A5YA@33154|Opisthokonta,3BSP9@33208|Metazoa,3D9EB@33213|Bilateria,4217Y@6656|Arthropoda,3SP7E@50557|Insecta,4589R@7147|Diptera	33208|Metazoa	KO	Heat shock factor binding protein 1	HSBP1	GO:0000122,GO:0001704,GO:0001706,GO:0003008,GO:0003012,GO:0003674,GO:0003712,GO:0003714,GO:0005488,GO:0005515,GO:0005575,GO:0005622,GO:0005623,GO:0005634,GO:0005654,GO:0005856,GO:0006355,GO:0006357,GO:0006936,GO:0007275,GO:0007369,GO:0007444,GO:0007492,GO:0008150,GO:0009653,GO:0009790,GO:0009888,GO:0009889,GO:0009890,GO:0009892,GO:0009987,GO:0010468,GO:0010556,GO:0010558,GO:0010605,GO:0010629,GO:…	-	ko:K19765	ko04212,map04212	-	-	-	ko00000,ko00001	-	-	-	HSBP1
LOC119646447	971.679	484.02	386.54	216.668	520.55	282.583	348.555	325.996	529.302	381.874	270.466	437.268	333.563	379.793	482.683	420.106	289.247	319.214	440.296	347.712	313.356	377.666	595.145	345.196	368.228	385.549	358.966	384.299	XP_037902826.1	43151.ADAC010118-PA	5.41e-123	358	COG1834@1|root,2QWPA@2759|Eukaryota,397GW@33154|Opisthokonta,3BFNA@33208|Metazoa,3CV93@33213|Bilateria,41UKH@6656|Arthropoda,3SKJ8@50557|Insecta,4592J@7147|Diptera,45HSC@7148|Nematocera	33208|Metazoa	E	Amidinotransferase	DDAH1	GO:0000052,GO:0001505,GO:0003008,GO:0003013,GO:0003018,GO:0003073,GO:0003674,GO:0003824,GO:0005488,GO:0005575,GO:0005622,GO:0005623,GO:0005737,GO:0005829,GO:0006082,GO:0006464,GO:0006520,GO:0006525,GO:0006527,GO:0006807,GO:0006809,GO:0007154,GO:0007165,GO:0007263,GO:0008015,GO:0008150,GO:0008152,GO:0008217,GO:0008270,GO:0008285,GO:0009056,GO:0009058,GO:0009063,GO:0009064,GO:0009065,GO:0009889,GO:…	3.5.3.18	ko:K01482	-	-	-	-	ko00000,ko01000,ko04147	-	-	-	Amidinotransf
LOC119646448	0	48.7088	48.5129	12.9988	48.564	70.6809	31.7081	56.4939	128.362	70.8649	22.557	138.685	81.7022	23.4785	45.1885	122.876	154.061	99.5625	61.0567	144.112	98.8	122.099	57.3591	63.9658	231.831	54.5099	28.0681	85.4194	XP_037902828.1	7213.XP_004531203.1	3.37e-214	604	KOG0583@1|root,KOG0583@2759|Eukaryota,38CXY@33154|Opisthokonta,3BBHD@33208|Metazoa,3CXUD@33213|Bilateria,41Y2M@6656|Arthropoda,3SKTP@50557|Insecta,44Z7H@7147|Diptera	33208|Metazoa	T	It is involved in the biological process described with protein phosphorylation	NIM1K	GO:0000166,GO:0000287,GO:0003674,GO:0003824,GO:0004672,GO:0004674,GO:0005488,GO:0005524,GO:0005575,GO:0005622,GO:0005623,GO:0005634,GO:0005737,GO:0006464,GO:0006468,GO:0006793,GO:0006796,GO:0006807,GO:0007154,GO:0007165,GO:0008144,GO:0008150,GO:0008152,GO:0009987,GO:0016301,GO:0016310,GO:0016740,GO:0016772,GO:0016773,GO:0017076,GO:0019538,GO:0023052,GO:0030554,GO:0032553,GO:0032555,GO:0032559,GO:…	2.7.11.1	ko:K16310	-	-	-	-	ko00000,ko01000,ko01001	-	-	-	Pkinase
LOC119646449	26.3602	35.8444	33.5832	26.0055	59.9015	24.3181	52.6865	51.937	41.4583	76.1147	42.2195	43.0727	33.8942	68.1942	44.2979	51.4509	29.0625	107.371	11.9392	38.5546	59.0949	96.2995	25.7951	24.3727	47.4225	16.6879	20.5206	57.9119	XP_037902831.1	7213.XP_004521932.1	1.18e-50	171	2E01N@1|root,2S7HI@2759|Eukaryota,3AAUF@33154|Opisthokonta,3BTWP@33208|Metazoa,3DBKT@33213|Bilateria,421BW@6656|Arthropoda,3SP4A@50557|Insecta,452Z1@7147|Diptera	33208|Metazoa	-	-	-	-	-	-	-	-	-	-	-	-	-	-	-
LOC119646451	643.015	176.199	107.039	265.785	139.871	130.293	90.6257	49.0751	94.4374	140.834	174.369	191.442	84.2334	347.716	88.8487	95.234	120.641	83.0068	81.3313	79.6372	103.982	98.8267	243.116	74.8208	130.519	138.735	91.8452	140.97	XP_037902829.1	7176.CPIJ004396-PA	1.5e-71	231	COG5648@1|root,KOG0381@2759|Eukaryota,38DGI@33154|Opisthokonta,3BGI7@33208|Metazoa,3CYRU@33213|Bilateria,41YI8@6656|Arthropoda,3SKUH@50557|Insecta,453I2@7147|Diptera,45BQ4@7148|Nematocera	33208|Metazoa	K	HMG-box domain	HMG20A	GO:0000122,GO:0000981,GO:0003674,GO:0003676,GO:0003677,GO:0003700,GO:0005488,GO:0005515,GO:0005575,GO:0005622,GO:0005623,GO:0005634,GO:0006325,GO:0006355,GO:0006357,GO:0006996,GO:0007275,GO:0007399,GO:0008150,GO:0009889,GO:0009890,GO:0009892,GO:0009987,GO:0010468,GO:0010556,GO:0010558,GO:0010605,GO:0010629,GO:0010721,GO:0016043,GO:0019219,GO:0019222,GO:0022008,GO:0030154,GO:0031323,GO:0031324,GO:…	-	-	-	-	-	-	-	-	-	-	HMG_box
LOC119646452	4147.59	654.29	651.299	2950.73	5161.46	2900.6	932.335	1395.75	1188.24	1964.86	1342.32	2377.67	929.893	2429.01	750.164	838.184	658.432	645.716	807.016	946.085	810.675	471.202	2542.62	987.657	1168.93	749.666	882.595	625.527	XP_037902830.1	7222.FBpp0145923	2.96e-20	81.3	2D0EY@1|root,2SDYX@2759|Eukaryota,3ACHF@33154|Opisthokonta,3BVQY@33208|Metazoa,3DNIA@33213|Bilateria,421K8@6656|Arthropoda,3SQ55@50557|Insecta,454TM@7147|Diptera,45Z42@7214|Drosophilidae	33208|Metazoa	S	ATP synthase regulation	Neb-cGP	GO:0003674,GO:0005102,GO:0005179,GO:0005488,GO:0005515,GO:0005575,GO:0005576,GO:0005615,GO:0005622,GO:0005623,GO:0005737,GO:0005739,GO:0005740,GO:0005743,GO:0005753,GO:0008150,GO:0009966,GO:0010469,GO:0010646,GO:0016020,GO:0016469,GO:0019866,GO:0023051,GO:0030545,GO:0031090,GO:0031966,GO:0031967,GO:0031975,GO:0032991,GO:0040008,GO:0043226,GO:0043227,GO:0043229,GO:0043231,GO:0044421,GO:0044422,GO:…	-	ko:K18194	-	-	-	-	ko00000,ko03029	-	-	-	ATP_synth_reg
LOC119646453	120.302	135.729	234.509	125.662	293.234	274.226	527.662	283.575	457.981	683.339	618.942	441.521	300.403	603.033	191.216	460.813	781.975	297.419	128.116	532.247	339.914	421.566	98.3072	536.962	417.139	84.0728	168.411	124.917	XP_037902832.1	7370.XP_005177919.1	7.49e-225	663	COG2234@1|root,KOG2194@2759|Eukaryota,38F29@33154|Opisthokonta,3BCDX@33208|Metazoa,3CTWE@33213|Bilateria,41V7T@6656|Arthropoda,3SI3R@50557|Insecta,451U3@7147|Diptera	33208|Metazoa	O	Peptidase family M28	-	-	-	-	-	-	-	-	-	-	-	-	Peptidase_M28
LOC119646454	66347.4	22515	27305.6	9311.22	50499.2	20672	13827.9	35993.3	3185.28	4650.95	1192.53	5804.99	9554.52	14027.1	5676.97	4093.52	177611	41879.4	9533.83	70890.6	44299.6	40327.8	73695.4	24044.1	6333.38	13786.2	17041.7	8603.57	XP_037902833.1	7213.XP_004537913.1	1.13e-92	286	28N19@1|root,2R63T@2759|Eukaryota,39YAF@33154|Opisthokonta,3BP5G@33208|Metazoa,3D09Z@33213|Bilateria,41Y9V@6656|Arthropoda,3SQJT@50557|Insecta,4556N@7147|Diptera	33208|Metazoa	O	Phosphatidylcholine 1-acylhydrolase activity. It is involved in the biological process described with lipid metabolic process	-	GO:0003674,GO:0003824,GO:0006629,GO:0008150,GO:0008152,GO:0009056,GO:0016042,GO:0016298,GO:0016787,GO:0016788,GO:0044238,GO:0071704,GO:1901575	-	-	-	-	-	-	-	-	-	-	Lipase
LOC119646458	7162.6	2831.05	2965.48	3053.64	25809.7	6982.27	2622.01	7174.48	4330.86	4150.01	3385.01	6883.09	5930.17	3642.51	4586.88	4269.4	687.511	650.005	617.166	585.467	1181.98	723.565	1731.01	991.597	561.979	719.564	1146.92	1199.45	XP_037902836.1	7244.FBpp0229347	1.71e-192	539	COG0111@1|root,KOG0068@2759|Eukaryota,38GJA@33154|Opisthokonta,3BEWZ@33208|Metazoa,3CTJ7@33213|Bilateria,41VU6@6656|Arthropoda,3SGK1@50557|Insecta,450ZJ@7147|Diptera,45WAM@7214|Drosophilidae	33208|Metazoa	E	Oxidoreductase activity, acting on the CH-OH group of donors, NAD or NADP as acceptor. It is involved in the biological process described with oxidation-reduction process	PHGDH	GO:0001505,GO:0003674,GO:0003824,GO:0004617,GO:0005575,GO:0005622,GO:0005623,GO:0005737,GO:0005829,GO:0006082,GO:0006091,GO:0006520,GO:0006541,GO:0006544,GO:0006563,GO:0006564,GO:0006566,GO:0006790,GO:0006805,GO:0006807,GO:0007049,GO:0007275,GO:0007399,GO:0007417,GO:0007420,GO:0008150,GO:0008152,GO:0008652,GO:0009055,GO:0009058,GO:0009064,GO:0009066,GO:0009069,GO:0009070,GO:0009410,GO:0009448,GO:…	1.1.1.399,1.1.1.95	ko:K00058	ko00260,ko00680,ko01100,ko01120,ko01130,ko01200,ko01230,map00260,map00680,map01100,map01120,map01130,map01200,map01230	M00020	R01513	RC00031	ko00000,ko00001,ko00002,ko01000,ko04147	-	-	-	2-Hacid_dh,2-Hacid_dh_C
LOC119646459	5.58875	8.34088	8.75668	0	6.92673	9.74653	12.3265	9.40919	14.9086	4.05073	2.50951	9.65717	15.6843	8.5361	11.8121	18.4322	0	5.10673	50.2656	29.4419	0	2.26505	5.47053	6.30797	0	4.6214	18.2107	44.3163	XP_037902840.1	7176.CPIJ003457-PA	5.88e-80	270	2DZQH@1|root,2S77B@2759|Eukaryota,39MZY@33154|Opisthokonta,3CPJ5@33208|Metazoa,3DAYI@33213|Bilateria,42ARV@6656|Arthropoda,3T054@50557|Insecta,4597F@7147|Diptera,45FKJ@7148|Nematocera	33208|Metazoa	O	Domain first found in C1r, C1s, uEGF, and bone morphogenetic protein.	-	-	-	-	-	-	-	-	-	-	-	-	CUB
LOC119646461	399.408	350.818	428.338	501.223	500.059	458.025	417.263	682.452	515.205	489.201	399.262	506.609	610.113	341.412	517.506	583.694	218.025	240.037	302.74	209.148	313.39	291.311	333.936	255.952	300.053	323.563	283.815	333.56	XP_037902837.1	7213.XP_004518001.1	2.95e-192	550	KOG2444@1|root,KOG2444@2759|Eukaryota,38J6R@33154|Opisthokonta,3BEVN@33208|Metazoa,3CWMP@33213|Bilateria,41X80@6656|Arthropoda,3SJ0K@50557|Insecta,44ZUB@7147|Diptera	33208|Metazoa	S	WD repeat-containing protein 55 homolog	WDR55	GO:0001654,GO:0001889,GO:0002376,GO:0002520,GO:0005575,GO:0005622,GO:0005623,GO:0005634,GO:0005730,GO:0005737,GO:0006139,GO:0006364,GO:0006396,GO:0006725,GO:0006807,GO:0006950,GO:0006952,GO:0007275,GO:0007423,GO:0008150,GO:0008152,GO:0009605,GO:0009607,GO:0009617,GO:0009987,GO:0010467,GO:0016070,GO:0016072,GO:0022613,GO:0031974,GO:0031981,GO:0032501,GO:0032502,GO:0034470,GO:0034641,GO:0034660,GO:…	-	-	-	-	-	-	-	-	-	-	ANAPC4_WD40,WD40
LOC119646462	503.208	573.254	835.931	323.57	1236.79	799.859	1211.25	1466.33	867.385	1274.83	781.94	915.147	1081.98	544.959	941.571	1165.08	1533.46	946.368	649.297	1601.2	1301.46	1256.64	640.364	1551.6	1026.8	761.378	781.165	884.391	XP_037902838.1	7370.XP_005188868.1	3.09e-139	403	COG0274@1|root,KOG3981@2759|Eukaryota,38FG8@33154|Opisthokonta,3BFYA@33208|Metazoa,3CXMC@33213|Bilateria,41WBT@6656|Arthropoda,3SGAV@50557|Insecta,450VH@7147|Diptera	33208|Metazoa	F	Deoxyribose-phosphate aldolase activity. It is involved in the biological process described with deoxyribonucleotide catabolic process	DERA	GO:0001775,GO:0002252,GO:0002263,GO:0002274,GO:0002275,GO:0002283,GO:0002366,GO:0002376,GO:0002443,GO:0002444,GO:0002446,GO:0003674,GO:0003824,GO:0004139,GO:0005575,GO:0005576,GO:0005622,GO:0005623,GO:0005634,GO:0005737,GO:0005829,GO:0005975,GO:0006081,GO:0006098,GO:0006139,GO:0006725,GO:0006732,GO:0006733,GO:0006739,GO:0006753,GO:0006793,GO:0006796,GO:0006807,GO:0006810,GO:0006887,GO:0006955,GO:…	4.1.2.4	ko:K01619	ko00030,map00030	-	R01066	RC00436,RC00437	ko00000,ko00001,ko01000	-	-	-	DeoC
LOC119646464	867.666	167.703	110.549	414.856	113.654	161.485	97.2458	73.4029	139.426	128.102	133.591	189.214	67.0345	185.266	98.6659	105.959	71.1948	48.6127	65.5147	65.6084	83.8671	81.0245	72.4326	39.7627	64.1082	131.039	87.5047	99.6017	XP_037902841.1	7159.AAEL003264-PA	4.75e-29	108	2C76C@1|root,2S31R@2759|Eukaryota,3A3KR@33154|Opisthokonta,3BRNE@33208|Metazoa,3D729@33213|Bilateria,42171@6656|Arthropoda,3SPDR@50557|Insecta,454UI@7147|Diptera,45IXV@7148|Nematocera	33208|Metazoa	S	Proteasome assembly chaperone 4	PSMG4	-	-	ko:K11878	-	-	-	-	ko00000,ko03051	-	-	-	PAC4
LOC119646465	0	4.85631	8.74963	4.33184	0	4.86956	3.51872	6.26444	11.5929	0	3.35039	3.5112	3.30178	5.3316	6.24635	8.44511	10.1709	3.82947	15.5452	13.2626	9.21141	3.40426	27.3941	4.50529	1.66196	11.0931	9.8633	4.02649	XP_037902842.1	7234.FBpp0175516	6.12e-92	288	KOG0485@1|root,KOG0485@2759|Eukaryota,3A560@33154|Opisthokonta,3BRSH@33208|Metazoa,3D85Z@33213|Bilateria,4206M@6656|Arthropoda,3SN11@50557|Insecta,44ZKF@7147|Diptera,45SHJ@7214|Drosophilidae	33208|Metazoa	K	Sequence-specific DNA binding. It is involved in the biological process described with regulation of transcription, DNA-templated	-	GO:0002164,GO:0007275,GO:0007525,GO:0007526,GO:0008150,GO:0009791,GO:0032501,GO:0032502,GO:0040011,GO:0048513,GO:0048569,GO:0048731,GO:0048856,GO:0060361,GO:0061061	-	ko:K09360	-	-	-	-	ko00000,ko03000	-	-	-	Homeobox
LOC119646466	54.4992	135.565	146.179	86.6654	6.92855	97.4714	115.35	85.739	101.875	110.379	143.854	59.6984	75.9437	110.975	100.066	135.172	194.768	158.307	150.808	169.267	173.85	178.895	124.886	126.158	186.995	172.833	149.477	134.566	XP_037902843.1	7220.FBpp0139397	1.69e-214	605	KOG1413@1|root,KOG1413@2759|Eukaryota,38PAJ@33154|Opisthokonta,3BJM1@33208|Metazoa,3CTXT@33213|Bilateria,41U3R@6656|Arthropoda,3SJY6@50557|Insecta,44YD1@7147|Diptera,45SQF@7214|Drosophilidae	33208|Metazoa	G	Acetylglucosaminyltransferase activity. It is involved in the biological process described with protein glycosylation	MGAT1	GO:0000139,GO:0001701,GO:0002252,GO:0002376,GO:0003002,GO:0003674,GO:0003824,GO:0003827,GO:0005575,GO:0005622,GO:0005623,GO:0005737,GO:0005794,GO:0005795,GO:0005797,GO:0005975,GO:0006040,GO:0006047,GO:0006049,GO:0006139,GO:0006464,GO:0006486,GO:0006487,GO:0006725,GO:0006793,GO:0006807,GO:0007275,GO:0007389,GO:0007399,GO:0007417,GO:0007420,GO:0007568,GO:0007610,GO:0007626,GO:0008150,GO:0008152,GO:…	2.4.1.101	ko:K00726	ko00510,ko00513,ko01100,map00510,map00513,map01100	-	R05983	-	ko00000,ko00001,ko01000,ko01003	-	GT13	-	GNT-I
LOC119646467	48647	48886	41293.3	24617.7	20728.4	30510.9	40350.3	24252	43045.6	55895.3	37878.5	50582.3	33530.3	46179.8	46711.5	44019	78764.6	70876.4	49478.2	80592.5	73451.5	71890.8	54860.6	67023.2	69196.8	62536.1	54417	55461.9	XP_037902845.1	103372.F4WEV7	8.35e-279	761	COG5277@1|root,KOG0676@2759|Eukaryota,38C0D@33154|Opisthokonta,3BBGP@33208|Metazoa,3CRBJ@33213|Bilateria,41XDG@6656|Arthropoda,3SIU0@50557|Insecta,46JEY@7399|Hymenoptera	33208|Metazoa	Z	Actin	ACTB	GO:0000003,GO:0000228,GO:0000278,GO:0000281,GO:0000785,GO:0000790,GO:0000910,GO:0003006,GO:0003674,GO:0005198,GO:0005200,GO:0005575,GO:0005622,GO:0005623,GO:0005634,GO:0005694,GO:0005737,GO:0005856,GO:0005884,GO:0005886,GO:0005912,GO:0005924,GO:0005925,GO:0006325,GO:0006338,GO:0006996,GO:0007010,GO:0007049,GO:0007275,GO:0007276,GO:0007281,GO:0007283,GO:0007286,GO:0007291,GO:0007349,GO:0008104,GO:…	-	ko:K05692	ko04015,ko04145,ko04210,ko04390,ko04391,ko04510,ko04520,ko04530,ko04611,ko04670,ko04714,ko04745,ko04810,ko04919,ko04921,ko05100,ko05110,ko05130,ko05131,ko05132,ko05164,ko05205,ko05225,ko05410,ko05412,ko05414,ko05416,ko05418,map04015,map04145,map04210,map04390,map04391,map04510,map04520,map04530,map04611,map04670,map04714,map04745,map04810,map04919,map04921,map05100,map05110,map05130,map05131,map0…	-	-	-	ko00000,ko00001,ko03019,ko03021,ko03029,ko03036,ko04147,ko04812	-	-	-	Actin
LOC119646468	325.117	416.401	640.3	447.787	666.961	513.924	485.758	526.4	651.927	650.399	475.936	404.814	817.491	352.013	459.618	717.328	469.483	423.949	398.341	456.995	446.256	432.507	348.037	383.09	452.218	480.877	382.533	392.322	XP_037902846.1	7370.XP_005184598.1	1.89e-138	407	KOG3890@1|root,KOG3890@2759|Eukaryota,38JH5@33154|Opisthokonta,3BGIN@33208|Metazoa,3CSF9@33213|Bilateria,41YSK@6656|Arthropoda,3SM22@50557|Insecta,4516N@7147|Diptera	33208|Metazoa	J	ribosomal protein S22	MRPS22	GO:0000313,GO:0000314,GO:0003674,GO:0003735,GO:0005198,GO:0005575,GO:0005622,GO:0005623,GO:0005737,GO:0005739,GO:0005740,GO:0005743,GO:0005759,GO:0005761,GO:0005763,GO:0005840,GO:0006412,GO:0006414,GO:0006415,GO:0006518,GO:0006807,GO:0008150,GO:0008152,GO:0009058,GO:0009059,GO:0009987,GO:0010467,GO:0015935,GO:0016020,GO:0016043,GO:0019538,GO:0019866,GO:0022411,GO:0031090,GO:0031966,GO:0031967,GO:…	-	ko:K17401	-	-	-	-	br01610,ko00000,ko03011,ko03029	-	-	-	MRP-S22
LOC119646469	1413.32	252.569	129.058	1159.85	495.334	468.207	133.79	79.2984	197.647	319.717	370.754	451.102	114.288	703.449	141.078	109.013	190.292	129.256	105.819	134.757	79.8018	183.125	431.876	146.489	186.567	204.877	124.155	137.976	XP_037902847.1	7260.FBpp0251070	1.92e-46	149	2CHT7@1|root,2S3PY@2759|Eukaryota,3A5XZ@33154|Opisthokonta,3BSJJ@33208|Metazoa,3D9DK@33213|Bilateria,420U4@6656|Arthropoda,3SNNN@50557|Insecta,45422@7147|Diptera,45YKQ@7214|Drosophilidae	33208|Metazoa	S	positive regulation of lamellipodium assembly	BRK1	GO:0001701,GO:0002252,GO:0002253,GO:0002376,GO:0002429,GO:0002431,GO:0002433,GO:0002682,GO:0002684,GO:0002757,GO:0002764,GO:0002768,GO:0003674,GO:0005488,GO:0005515,GO:0005575,GO:0005622,GO:0005623,GO:0005737,GO:0005829,GO:0006810,GO:0006897,GO:0006909,GO:0006928,GO:0006996,GO:0007010,GO:0007154,GO:0007165,GO:0007166,GO:0007167,GO:0007169,GO:0007264,GO:0007265,GO:0007275,GO:0007399,GO:0007417,GO:…	-	ko:K05752	ko04810,map04810	-	-	-	ko00000,ko00001	-	-	-	-
LOC119646471	18.76	5.26481	7.3593	6.82815	0	2.30466	0	0	8.7604	0.95715	7.61864	3.00149	5.01791	12.1642	6.02577	5.34157	0	1.20687	5.45825	0	0	4.27422	15.1263	0	0	6.11447	6.10359	0	XP_037902849.1	7213.XP_004535918.1	0	931	KOG3549@1|root,KOG3549@2759|Eukaryota,38DF3@33154|Opisthokonta,3BD4J@33208|Metazoa,3CTPQ@33213|Bilateria,41VKF@6656|Arthropoda,3SG9M@50557|Insecta,44Z8U@7147|Diptera	33208|Metazoa	W	PDZ domain (Also known as DHR or GLGF)	SNTG1	GO:0001654,GO:0001726,GO:0001745,GO:0001751,GO:0001754,GO:0003674,GO:0005102,GO:0005198,GO:0005488,GO:0005515,GO:0005575,GO:0005622,GO:0005623,GO:0005634,GO:0005737,GO:0005856,GO:0005886,GO:0006996,GO:0007154,GO:0007275,GO:0007399,GO:0007417,GO:0007423,GO:0008022,GO:0008092,GO:0008150,GO:0008307,GO:0008582,GO:0009653,GO:0009887,GO:0009987,GO:0016010,GO:0016013,GO:0016020,GO:0016043,GO:0019904,GO:…	-	-	-	-	-	-	-	-	-	-	PDZ
LOC119646474	9.79263	96.0616	138.821	38.9984	102.383	69.472	123.33	153.828	95.2396	80.9868	113.589	29.844	139.471	38.4239	129.337	89.0905	138.081	144.24	108.961	99.9733	138.34	105.097	81.9152	123.427	95.5589	77.6037	153.996	93.4872	XP_037902856.1	7070.TC012726-PA	7.13e-83	298	KOG1721@1|root,KOG1721@2759|Eukaryota,38GE2@33154|Opisthokonta,3B95D@33208|Metazoa,3CTJ5@33213|Bilateria,41XU7@6656|Arthropoda,3SJSV@50557|Insecta	33208|Metazoa	K	PR domain zinc finger protein 10-like	PRDM10	GO:0000981,GO:0003674,GO:0003700,GO:0006355,GO:0006357,GO:0008150,GO:0009889,GO:0010468,GO:0010556,GO:0019219,GO:0019222,GO:0031323,GO:0031326,GO:0050789,GO:0050794,GO:0051171,GO:0051252,GO:0060255,GO:0065007,GO:0080090,GO:0140110,GO:1903506,GO:2000112,GO:2001141	-	-	-	-	-	-	-	-	-	-	Tristanin_u2,zf-C2H2,zf-met
LOC119646476	5433.3	1156.5	983.578	1814.27	3673.4	2381.86	1266.16	1253.06	1824.12	2486.31	1564.13	2590.57	980.227	1499.69	1028.75	1403.93	767.454	749.606	746.358	753.538	817.397	690.55	1641.3	898.736	1232.85	929.492	820.52	978.745	XP_037902858.1	7165.AGAP005129-PA	1.05e-133	386	COG0005@1|root,KOG3985@2759|Eukaryota,38GVK@33154|Opisthokonta,3BF5F@33208|Metazoa,3CS6F@33213|Bilateria,41UQB@6656|Arthropoda,3SI22@50557|Insecta,45016@7147|Diptera,45G2U@7148|Nematocera	33208|Metazoa	F	Catalyzes the reversible phosphorylation of S-methyl-5'- thioadenosine (MTA) to adenine and 5-methylthioribose-1-phosphate. Involved in the breakdown of MTA, a major by-product of polyamine biosynthesis. Responsible for the first step in the methionine salvage pathway after MTA has been generated from S- adenosylmethionine. Has broad substrate specificity with 6- aminopurine nucleosides as prefer…	MTAP	GO:0000096,GO:0000097,GO:0003674,GO:0003824,GO:0004645,GO:0004731,GO:0005575,GO:0005622,GO:0005623,GO:0005737,GO:0005829,GO:0006082,GO:0006139,GO:0006520,GO:0006555,GO:0006725,GO:0006790,GO:0006807,GO:0007154,GO:0007165,GO:0007166,GO:0008150,GO:0008152,GO:0008652,GO:0009058,GO:0009066,GO:0009067,GO:0009086,GO:0009987,GO:0010033,GO:0016053,GO:0016740,GO:0016757,GO:0016758,GO:0016763,GO:0017061,GO:…	2.4.2.28	ko:K00772	ko00270,ko01100,map00270,map01100	M00034	R01402	RC00063,RC02819	ko00000,ko00001,ko00002,ko01000	-	-	-	PNP_UDP_1
LOC119646477	2314.01	435.788	264.212	1923.52	1555.59	923.286	299.878	312.771	462.938	653.278	734.742	1151.51	409.5	1410.1	286.008	353.994	433.02	309.499	355.279	308.012	361.982	304.479	1094.28	349.58	408.712	425.259	381.801	364.864	XP_037902859.1	7159.AAEL007125-PA	5.03e-28	103	2DZUE@1|root,2S7B1@2759|Eukaryota,3A8U7@33154|Opisthokonta,3BTYY@33208|Metazoa,3DB0A@33213|Bilateria,42102@6656|Arthropoda,3SP9P@50557|Insecta,454Q1@7147|Diptera,45JMH@7148|Nematocera	33208|Metazoa	S	PET assembly of cytochrome c oxidase, mitochondrial	PET117	GO:0005575,GO:0005622,GO:0005623,GO:0005737,GO:0005739,GO:0006996,GO:0007005,GO:0008150,GO:0008535,GO:0009987,GO:0016043,GO:0017004,GO:0022607,GO:0033108,GO:0033617,GO:0034622,GO:0043226,GO:0043227,GO:0043229,GO:0043231,GO:0043933,GO:0044085,GO:0044424,GO:0044444,GO:0044464,GO:0065003,GO:0071840	-	ko:K18188	-	-	-	-	ko00000,ko03029	-	-	-	PET117
LOC119646479	247.6	451.042	465.649	239.768	267.212	351.01	472.167	414.378	504.358	332.051	461.904	415.187	481.14	338.34	623.02	724.244	350.29	488.89	454.994	382.273	515.143	387.654	304.931	429.749	370.605	529.379	490.061	437.613	XP_037902860.1	7213.XP_004527494.1	0	1033	COG5657@1|root,KOG1993@2759|Eukaryota,38EA7@33154|Opisthokonta,3BE4T@33208|Metazoa,3CXXI@33213|Bilateria,41Y6A@6656|Arthropoda,3SHP4@50557|Insecta,44WT0@7147|Diptera	33208|Metazoa	UY	Ran GTPase binding. It is involved in the biological process described with intracellular protein transport	IPO11	GO:0001650,GO:0003674,GO:0005215,GO:0005575,GO:0005622,GO:0005623,GO:0005634,GO:0005635,GO:0005730,GO:0005737,GO:0005829,GO:0006606,GO:0006610,GO:0006810,GO:0006886,GO:0006913,GO:0008104,GO:0008150,GO:0008565,GO:0012505,GO:0015031,GO:0015833,GO:0017038,GO:0031967,GO:0031974,GO:0031975,GO:0031981,GO:0033036,GO:0033365,GO:0034504,GO:0034613,GO:0042886,GO:0043226,GO:0043227,GO:0043228,GO:0043229,GO:…	-	-	-	-	-	-	-	-	-	-	IBN_N
LOC119646480	597.941	578.045	557.943	485.355	538.103	480.876	660.576	581.273	529.383	676.954	480.797	575.269	541.825	773.165	534.939	578.315	723.852	554.29	579.923	704.007	609.261	691.545	612.998	686.107	761.588	551.394	599.739	576.699	XP_037902861.1	7213.XP_004533377.1	2.05e-123	358	COG5080@1|root,KOG3103@2759|Eukaryota,38BJ4@33154|Opisthokonta,3BFWT@33208|Metazoa,3D087@33213|Bilateria,41ZGV@6656|Arthropoda,3SMNF@50557|Insecta,45099@7147|Diptera	33208|Metazoa	U	Yip1 domain	YIPF5	GO:0000003,GO:0005575,GO:0005622,GO:0005623,GO:0005634,GO:0005654,GO:0005737,GO:0005783,GO:0005794,GO:0005798,GO:0007276,GO:0007283,GO:0008150,GO:0012505,GO:0016020,GO:0019953,GO:0022414,GO:0030134,GO:0030135,GO:0031410,GO:0031974,GO:0031981,GO:0031982,GO:0032386,GO:0032501,GO:0032504,GO:0032879,GO:0042175,GO:0043226,GO:0043227,GO:0043229,GO:0043231,GO:0043233,GO:0044422,GO:0044424,GO:0044428,GO:…	-	ko:K20363	-	-	-	-	ko00000,ko04131	-	-	-	Yip1
LOC119646481	4493.14	496.638	376.318	2101.17	1642.58	1193.19	344.695	305.708	518.459	939.562	826.407	1270.08	349.065	1437.94	342.791	397.004	431.577	310.748	281.445	321.179	334.531	387.041	1200.43	405.521	788.201	459.47	335.363	317.499	XP_037902862.1	7176.CPIJ000751-PA	8.76e-45	148	KOG3918@1|root,KOG3918@2759|Eukaryota,3A73Y@33154|Opisthokonta,3BSH1@33208|Metazoa,3D6CT@33213|Bilateria,420DJ@6656|Arthropoda,3SP0H@50557|Insecta,453VX@7147|Diptera,45IR9@7148|Nematocera	33208|Metazoa	S	Membrane magnesium transporter	MMGT1	GO:0000041,GO:0000139,GO:0003674,GO:0005215,GO:0005375,GO:0005381,GO:0005384,GO:0005575,GO:0005622,GO:0005623,GO:0005737,GO:0005768,GO:0005769,GO:0005783,GO:0005789,GO:0005794,GO:0005886,GO:0006810,GO:0006811,GO:0006812,GO:0006824,GO:0006825,GO:0006826,GO:0006828,GO:0008150,GO:0008324,GO:0012505,GO:0015075,GO:0015087,GO:0015093,GO:0015095,GO:0015099,GO:0015318,GO:0015675,GO:0015684,GO:0015693,GO:…	-	-	-	-	-	-	-	-	-	-	MMgT
LOC119646482	459.552	591.603	854.945	602.637	756.828	759.838	1008.31	1190.97	1021.84	982.266	726.486	1480	1047.25	705.436	737.585	1247.63	1110.65	1055.41	733.463	1098.11	926.388	767.559	544.874	993.562	709.563	660.922	446.825	480.231	XP_037902864.1	7213.XP_004520575.1	2.62e-224	624	COG0388@1|root,KOG0808@2759|Eukaryota,39RP7@33154|Opisthokonta,3BBQB@33208|Metazoa,3CVE8@33213|Bilateria,41XD4@6656|Arthropoda,3SGA7@50557|Insecta,450ZD@7147|Diptera	33208|Metazoa	E	Hydrolase activity, acting on carbon-nitrogen (but not peptide) bonds. It is involved in the biological process described with nitrogen compound metabolic process	UPB1	GO:0001505,GO:0001889,GO:0003674,GO:0003824,GO:0003837,GO:0005488,GO:0005575,GO:0005622,GO:0005623,GO:0005737,GO:0005829,GO:0006082,GO:0006139,GO:0006206,GO:0006207,GO:0006208,GO:0006210,GO:0006212,GO:0006213,GO:0006520,GO:0006725,GO:0006807,GO:0007275,GO:0008150,GO:0008152,GO:0008270,GO:0008652,GO:0009056,GO:0009058,GO:0009112,GO:0009116,GO:0009164,GO:0009987,GO:0016053,GO:0016787,GO:0016810,GO:…	3.5.1.6	ko:K01431	ko00240,ko00410,ko00770,ko00983,ko01100,map00240,map00410,map00770,map00983,map01100	M00046	R00905,R04666,R08228	RC00096	ko00000,ko00001,ko00002,ko01000	-	-	-	CN_hydrolase
LOC119646483	5557.25	1627.36	2210.08	2850.19	6554.97	3713.09	2735.93	3206.65	2382.65	4781.57	2026.43	4878.71	3432.92	2382.93	3095.85	2330.95	1762.67	2018.55	1457.09	1328.77	1084.69	898.391	1996.4	1846.41	949.671	1119.35	1157.41	958.64	XP_037902866.1	7260.FBpp0249231	8.34e-105	310	KOG1207@1|root,KOG1207@2759|Eukaryota,39RC8@33154|Opisthokonta,3BENY@33208|Metazoa,3CXY6@33213|Bilateria,41WMV@6656|Arthropoda,3SFPC@50557|Insecta,4513N@7147|Diptera,45R89@7214|Drosophilidae	33208|Metazoa	Q	Oxidoreductase activity. It is involved in the biological process described with metabolic process	DCXR	GO:0003674,GO:0003824,GO:0004090,GO:0005488,GO:0005515,GO:0005575,GO:0005622,GO:0005623,GO:0005737,GO:0005856,GO:0005874,GO:0005881,GO:0005886,GO:0005902,GO:0005903,GO:0005975,GO:0005996,GO:0005997,GO:0005998,GO:0006006,GO:0006063,GO:0006064,GO:0006082,GO:0006139,GO:0006725,GO:0006732,GO:0006733,GO:0006739,GO:0006753,GO:0006793,GO:0006796,GO:0006807,GO:0008150,GO:0008152,GO:0009056,GO:0009058,GO:…	1.1.1.10	ko:K03331	ko00040,ko01100,map00040,map01100	M00014	R01904	RC00102	ko00000,ko00001,ko00002,ko01000	-	-	-	adh_short,adh_short_C2
LOC119646485	236.571	524.239	384.605	750.08	293.488	330.464	636.808	312.23	494.975	353.281	710.902	245.485	428.693	377.77	923.626	422.107	464.827	450.017	514.325	487.77	334.049	409.528	329.914	488.993	232.908	207.494	321.197	301.259	XP_037902872.1	7213.XP_004520571.1	5.9e-308	947	COG0515@1|root,KOG0197@2759|Eukaryota,38E1B@33154|Opisthokonta,3BAZR@33208|Metazoa,3CTKV@33213|Bilateria,41VM4@6656|Arthropoda,3SG2J@50557|Insecta,450KU@7147|Diptera	33208|Metazoa	T	ATP binding. It is involved in the biological process described with protein phosphorylation	Src42A	GO:0000165,GO:0000902,GO:0000904,GO:0001654,GO:0001700,GO:0002009,GO:0002165,GO:0002376,GO:0003674,GO:0003824,GO:0004672,GO:0004713,GO:0004715,GO:0005102,GO:0005488,GO:0005515,GO:0005575,GO:0005622,GO:0005623,GO:0005886,GO:0005912,GO:0006082,GO:0006091,GO:0006099,GO:0006101,GO:0006464,GO:0006468,GO:0006793,GO:0006796,GO:0006807,GO:0006810,GO:0006897,GO:0006909,GO:0006928,GO:0006935,GO:0006950,GO:…	2.7.10.2	ko:K08892	ko04013,map04013	-	-	-	ko00000,ko00001,ko01000,ko01001	-	-	-	Pkinase_Tyr,SH2,SH3_1
LOC119646487	200.042	174.017	301.899	125.662	161.373	113.348	252.822	320.205	267.5	191.333	195.449	125.521	301.227	210.262	190.524	182.789	351.743	288.482	911.192	346.98	252.962	278.017	463.301	328.842	235.99	379.709	596.264	257.894	XP_037902874.1	7159.AAEL001184-PA	2.07e-147	433	2APXQ@1|root,2RZHR@2759|Eukaryota,3A244@33154|Opisthokonta,3BQJD@33208|Metazoa,3D74R@33213|Bilateria,41Z7D@6656|Arthropoda,3SND3@50557|Insecta,451PS@7147|Diptera,45E96@7148|Nematocera	33208|Metazoa	-	-	-	-	-	-	-	-	-	-	-	-	-	-	Claudin_2
LOC119646489	435.694	407.757	306.431	326.445	204.158	183.938	258.803	294.707	323.869	228.905	255.31	273.062	230.343	197.376	244.505	307.207	241.281	199.182	264.443	269.55	316.018	235.791	191.617	192.867	279.276	195.066	209.449	302.941	XP_037902876.1	7159.AAEL002483-PA	1.73e-222	630	KOG2762@1|root,KOG2762@2759|Eukaryota,38BSJ@33154|Opisthokonta,3BF6K@33208|Metazoa,3CS4N@33213|Bilateria,41UQR@6656|Arthropoda,3SJ3C@50557|Insecta,451KF@7147|Diptera,45FZC@7148|Nematocera	33208|Metazoa	G	ALG3 protein	ALG3	GO:0000030,GO:0000033,GO:0003674,GO:0003824,GO:0005575,GO:0005622,GO:0005623,GO:0005737,GO:0005783,GO:0005789,GO:0006464,GO:0006486,GO:0006487,GO:0006488,GO:0006490,GO:0006629,GO:0006807,GO:0008150,GO:0008152,GO:0009058,GO:0009059,GO:0009100,GO:0009101,GO:0009987,GO:0012505,GO:0016020,GO:0016740,GO:0016757,GO:0016758,GO:0019538,GO:0031984,GO:0034645,GO:0036211,GO:0042175,GO:0043170,GO:0043226,GO:…	2.4.1.258	ko:K03845	ko00510,ko00513,ko01100,map00510,map00513,map01100	M00055	R06258	-	ko00000,ko00001,ko00002,ko01000,ko01003	-	GT58	-	ALG3
LOC119646492	2577.6	1786.92	2298.3	1653.94	3603.72	2755.61	2640.44	3776.65	2285.56	6121.73	1670.79	2799.62	1609.53	2969.44	2480.8	2365.49	5550.96	3501.62	1755.79	6424.19	3523.51	4092.92	2953.11	4839.03	4968.05	3931.76	4840.48	2943.44	XP_037902878.1	6669.EFX71508	3.87e-150	434	COG2130@1|root,KOG1196@2759|Eukaryota,39AU4@33154|Opisthokonta,3BC1U@33208|Metazoa,3CZZB@33213|Bilateria,41UVE@6656|Arthropoda	33208|Metazoa	L	Prostaglandin reductase	PTGR1	GO:0003674,GO:0003824,GO:0005575,GO:0005622,GO:0005623,GO:0005737,GO:0005829,GO:0006082,GO:0006690,GO:0006691,GO:0008150,GO:0008152,GO:0009987,GO:0016491,GO:0016614,GO:0016616,GO:0019752,GO:0036185,GO:0042221,GO:0042493,GO:0043436,GO:0044237,GO:0044281,GO:0044424,GO:0044444,GO:0044464,GO:0050896,GO:0055114,GO:0071704,GO:0097257,GO:0097327,GO:1901568	1.3.1.48,1.3.1.74	ko:K13948	-	-	-	-	ko00000,ko01000	-	-	-	ADH_N_2,ADH_zinc_N
LOC119646493	72.6863	59.1121	59.9594	30.3327	176.762	67.0175	79.2571	82.6197	52.1787	89.1063	14.2131	59.6957	55.3033	90.7064	27.8008	43.0091	155.524	357.453	175.961	198.646	143.571	183.333	121.191	163.095	196.128	137.697	160.849	265.114	XP_037902879.1	6669.EFX71508	3.53e-141	411	COG2130@1|root,KOG1196@2759|Eukaryota,39AU4@33154|Opisthokonta,3BC1U@33208|Metazoa,3CZZB@33213|Bilateria,41UVE@6656|Arthropoda	33208|Metazoa	L	Prostaglandin reductase	PTGR1	GO:0003674,GO:0003824,GO:0005575,GO:0005622,GO:0005623,GO:0005737,GO:0005829,GO:0006082,GO:0006690,GO:0006691,GO:0008150,GO:0008152,GO:0009987,GO:0016491,GO:0016614,GO:0016616,GO:0019752,GO:0036185,GO:0042221,GO:0042493,GO:0043436,GO:0044237,GO:0044281,GO:0044424,GO:0044444,GO:0044464,GO:0050896,GO:0055114,GO:0071704,GO:0097257,GO:0097327,GO:1901568	1.3.1.48,1.3.1.74	ko:K13948	-	-	-	-	ko00000,ko01000	-	-	-	ADH_N_2,ADH_zinc_N
LOC119646497	27.9424	58.3828	93.6285	36.1108	83.1133	70.6621	99.4915	131.724	72.8879	63.801	35.1364	54.4327	80.9004	21.3403	68.0918	109.059	142.443	91.9234	144.812	78.0274	123.793	184.625	137.689	136.076	32.4136	55.459	100.92	60.4316	XP_037902880.1	7370.XP_005190928.1	2.77e-152	476	KOG1844@1|root,KOG4161@1|root,KOG1844@2759|Eukaryota,KOG4161@2759|Eukaryota,38BEJ@33154|Opisthokonta,3BJEJ@33208|Metazoa,3CXIN@33213|Bilateria,41UN3@6656|Arthropoda,3SGG6@50557|Insecta,451VG@7147|Diptera	33208|Metazoa	BK	Zinc ion binding	PHF20	GO:0000123,GO:0000785,GO:0000981,GO:0003674,GO:0003682,GO:0003700,GO:0005488,GO:0005515,GO:0005575,GO:0005622,GO:0005623,GO:0005634,GO:0005635,GO:0005654,GO:0005694,GO:0005700,GO:0005705,GO:0005737,GO:0005829,GO:0006325,GO:0006355,GO:0006357,GO:0006464,GO:0006473,GO:0006475,GO:0006807,GO:0006996,GO:0008150,GO:0008152,GO:0009889,GO:0009891,GO:0009893,GO:0009966,GO:0009987,GO:0010468,GO:0010556,GO:…	-	ko:K18402	-	-	-	-	ko00000,ko03036	-	-	-	DUF3776,MBD,MBT,PHD,PHD20L1_u1,THAP
LOC119646499	376.958	158.337	204.72	190.668	418.54	204.632	206.847	267.491	242.7	198.532	196.77	322.242	334.386	168.561	227.109	273.415	303.782	173.651	202.204	191.529	161.947	286.918	261.048	363.219	114.707	147.006	188.209	145.019	XP_037902882.1	136037.KDR24228	6.38e-148	435	KOG3645@1|root,KOG3645@2759|Eukaryota,39QA0@33154|Opisthokonta,3BJ0P@33208|Metazoa,3D1AU@33213|Bilateria,41UKD@6656|Arthropoda,3SK1R@50557|Insecta	33208|Metazoa	T	channel activity. It is involved in the biological process described with ion transport	-	GO:0003008,GO:0003674,GO:0005215,GO:0005216,GO:0005230,GO:0005231,GO:0005261,GO:0005575,GO:0005623,GO:0005886,GO:0005887,GO:0005892,GO:0006810,GO:0006811,GO:0006812,GO:0007154,GO:0007165,GO:0007166,GO:0007267,GO:0007268,GO:0007271,GO:0008150,GO:0008324,GO:0009987,GO:0015075,GO:0015267,GO:0015276,GO:0015318,GO:0016020,GO:0016021,GO:0022803,GO:0022824,GO:0022834,GO:0022835,GO:0022836,GO:0022838,GO:…	-	ko:K04803,ko:K05312	ko04080,map04080	-	-	-	ko00000,ko00001,ko04040	1.A.9.1	-	-	Neur_chan_LBD,Neur_chan_memb
LOC119646501	11997.2	2976.51	3140.32	35992.1	24804.7	18994.3	6898.1	10445.8	1203.63	4548.24	5702.67	5967.17	2049.32	8693	4947.94	1038.41	3042.21	4090.47	3252.76	2222.65	5496.4	6231.12	7877.31	5063.81	2712.76	2931.88	2596.29	2377.41	NA	NA	NA	NA	NA	NA	NA	NA	NA	NA	NA	NA	NA	NA	NA	NA	NA	NA	NA	NA	NA
LOC119646502	0	19.488	12.1284	5.77679	0	0	0	0	4.96838	2.02441	0	0	9.07683	0	4.86685	2.30376	0	0	7.18331	0	2.6347	3.38984	20.0214	2.70244	4.1542	8.31363	5.30952	3.22327	XP_037902886.1	400682.PAC_15707793	7.53e-193	603	COG2801@1|root,KOG0017@2759|Eukaryota,38F42@33154|Opisthokonta,3BA5H@33208|Metazoa	33208|Metazoa	OU	K02A2.6-like	-	-	-	-	-	-	-	-	-	-	-	-	RVT_1,rve,zf-H2C2
LOC119646505	72.6352	73.6556	65.3332	661.553	154.053	235.119	81.8754	51.2183	52.1821	56.7154	304.595	70.238	74.2997	457.727	98.6514	73.7298	17.442	21.7048	38.2943	48.5937	39.5057	28.3269	80.2662	44.1588	71.4784	47.1438	31.1121	53.9838	XP_037902888.1	7159.AAEL003051-PA	1.84e-57	182	2E8FU@1|root,2SEY2@2759|Eukaryota,3A8XI@33154|Opisthokonta,3BU09@33208|Metazoa,3DAMD@33213|Bilateria,4218Y@6656|Arthropoda,3SP95@50557|Insecta,453UR@7147|Diptera,45IFY@7148|Nematocera	33208|Metazoa	S	SAM / Pointed domain	-	GO:0000122,GO:0000981,GO:0000988,GO:0000989,GO:0001076,GO:0001191,GO:0003674,GO:0003700,GO:0005488,GO:0005515,GO:0005575,GO:0005622,GO:0005623,GO:0005634,GO:0006355,GO:0006357,GO:0006810,GO:0006913,GO:0007275,GO:0007389,GO:0007399,GO:0007423,GO:0008150,GO:0009790,GO:0009880,GO:0009889,GO:0009890,GO:0009892,GO:0009966,GO:0009987,GO:0010468,GO:0010556,GO:0010558,GO:0010605,GO:0010629,GO:0010646,GO:…	-	ko:K20232	ko04013,map04013	-	-	-	ko00000,ko00001	-	-	-	SAM_PNT
LOC119646506	875.35	139.916	96.7149	582.241	177.967	89.9749	54.4406	49.8557	110.281	147.16	150.321	226.796	61.1764	304.739	78.9017	77.5604	37.7812	63.9127	56.1121	72.6673	56.4665	85.9952	233.106	37.9132	89.0227	58.4104	79.8027	75.6051	XP_037902889.1	7213.XP_004526053.1	1.87e-102	297	COG0652@1|root,KOG0884@2759|Eukaryota,3A033@33154|Opisthokonta,3BAXY@33208|Metazoa,3CV7X@33213|Bilateria,41X9C@6656|Arthropoda,3SH80@50557|Insecta,44X1Z@7147|Diptera	33208|Metazoa	O	PPIases accelerate the folding of proteins. It catalyzes the cis-trans isomerization of proline imidic peptide bonds in oligopeptides	PPIL3	GO:0000209,GO:0000375,GO:0000377,GO:0000398,GO:0000413,GO:0003674,GO:0003755,GO:0003824,GO:0005575,GO:0005622,GO:0005623,GO:0005634,GO:0005681,GO:0006139,GO:0006396,GO:0006397,GO:0006464,GO:0006725,GO:0006807,GO:0008150,GO:0008152,GO:0008380,GO:0009987,GO:0010467,GO:0016070,GO:0016071,GO:0016567,GO:0016853,GO:0016859,GO:0018193,GO:0018208,GO:0019538,GO:0032446,GO:0032991,GO:0034641,GO:0036211,GO:…	5.2.1.8	ko:K12734,ko:K22190	-	-	-	-	ko00000,ko01000,ko02000,ko03041,ko03110	1.A.37.2	-	-	Pro_isomerase
LOC119646507	177.887	95.7904	105.175	112.752	35.6043	77.6998	98.1072	69.2477	140.264	136.249	80.0233	133.782	116.693	104.34	92.4384	151.256	98.7986	88.273	84.5633	95.4599	73.3743	86.864	81.7595	81.3376	79.9302	108.753	63.9227	49.7953	XP_037902890.1	7227.FBpp0111321	1.08e-46	154	2CXS0@1|root,2RZAY@2759|Eukaryota,3A1RH@33154|Opisthokonta,3BQIY@33208|Metazoa,3D7IV@33213|Bilateria,420Q2@6656|Arthropoda,3SNWV@50557|Insecta,454AW@7147|Diptera	33208|Metazoa	-	-	NR2C2AP	GO:0005575,GO:0005622,GO:0005623,GO:0005634,GO:0005654,GO:0006139,GO:0006351,GO:0006352,GO:0006366,GO:0006367,GO:0006725,GO:0006807,GO:0008150,GO:0008152,GO:0009058,GO:0009059,GO:0009987,GO:0010467,GO:0016070,GO:0018130,GO:0019438,GO:0031974,GO:0031981,GO:0032774,GO:0034641,GO:0034645,GO:0034654,GO:0043170,GO:0043226,GO:0043227,GO:0043229,GO:0043231,GO:0043233,GO:0044237,GO:0044238,GO:0044249,GO:…	-	-	-	-	-	-	-	-	-	-	F5_F8_type_C,Sad1_UNC
LOC119646508	174027	15457.5	12016	113844	144568	88653	15854.1	19973.8	21161.2	38558.8	44353.1	58144.8	22630.2	81277	15825.9	16762.5	16899.9	14034.2	13324.7	16892.9	21964	19736	81153.6	18755.7	26022.9	23596	11936.1	13183.8	XP_037902892.1	7159.AAEL005451-PA	2.12e-36	123	KOG3499@1|root,KOG3499@2759|Eukaryota,3A8NK@33154|Opisthokonta,3BSI0@33208|Metazoa,3D980@33213|Bilateria,420CC@6656|Arthropoda,3SNMQ@50557|Insecta,4546D@7147|Diptera,45J64@7148|Nematocera	33208|Metazoa	J	Belongs to the eukaryotic ribosomal protein eL38 family	RPL38	GO:0000027,GO:0000028,GO:0000184,GO:0000956,GO:0001501,GO:0001503,GO:0002181,GO:0003008,GO:0003674,GO:0003676,GO:0003723,GO:0003735,GO:0005198,GO:0005488,GO:0005575,GO:0005622,GO:0005623,GO:0005737,GO:0005829,GO:0005840,GO:0005844,GO:0006139,GO:0006401,GO:0006402,GO:0006412,GO:0006413,GO:0006417,GO:0006518,GO:0006605,GO:0006612,GO:0006613,GO:0006614,GO:0006725,GO:0006807,GO:0006810,GO:0006886,GO:…	-	ko:K02923	ko03010,map03010	M00177	-	-	br01610,ko00000,ko00001,ko00002,ko03011	-	-	-	Ribosomal_L38e
LOC119646509	1244.6	438.703	596.294	1770.97	1212.34	1186.95	482.886	385.065	1026.46	1201.92	950.752	1553.68	768.146	1067.49	503.7	1075.99	447.684	370.381	565.562	304.054	386.867	304.856	955.254	460.715	443.986	558.807	468.409	387.415	XP_037902893.1	7217.FBpp0114075	6.71e-90	273	KOG2873@1|root,KOG2873@2759|Eukaryota,38HKQ@33154|Opisthokonta,3BM2S@33208|Metazoa,3CZHN@33213|Bilateria,41ZPB@6656|Arthropoda,3SN5U@50557|Insecta,44X77@7147|Diptera,45TNK@7214|Drosophilidae	33208|Metazoa	C	Ubiquinol-cytochrome C chaperone	UQCC1	GO:0005575,GO:0005622,GO:0005623,GO:0005737,GO:0005739,GO:0005740,GO:0005743,GO:0006417,GO:0006996,GO:0007005,GO:0007030,GO:0008150,GO:0009889,GO:0009891,GO:0009893,GO:0009987,GO:0010256,GO:0010468,GO:0010556,GO:0010557,GO:0010604,GO:0010608,GO:0010628,GO:0016020,GO:0016043,GO:0017004,GO:0017062,GO:0019222,GO:0019866,GO:0022607,GO:0031090,GO:0031323,GO:0031325,GO:0031326,GO:0031328,GO:0031410,GO:…	-	ko:K17662	-	-	-	-	ko00000,ko03029	-	-	-	Ubiq_cyt_C_chap
LOC119646510	1357.6	149.441	76.4165	978.456	482.668	568.425	111.32	57.9543	98.7405	239.843	376.323	350.172	81.9118	740.104	91.8334	72.9458	84.2779	69.0706	82.2338	64.0431	79.9744	88.9441	495.945	121.968	230.596	160.697	67.7025	125.341	XP_037902894.1	7370.XP_005178241.1	3.27e-25	96.7	2CYW9@1|root,2S6UI@2759|Eukaryota,3A8MC@33154|Opisthokonta,3BSJT@33208|Metazoa,3D9A7@33213|Bilateria,421FS@6656|Arthropoda,3SPTG@50557|Insecta	33208|Metazoa	S	Mitotic-spindle organizing gamma-tubulin ring associated	MZT1	GO:0000226,GO:0000278,GO:0000280,GO:0000923,GO:0000930,GO:0000931,GO:0003674,GO:0005488,GO:0005515,GO:0005575,GO:0005622,GO:0005623,GO:0005737,GO:0005813,GO:0005815,GO:0005819,GO:0005829,GO:0005856,GO:0006996,GO:0007010,GO:0007017,GO:0007020,GO:0007049,GO:0007051,GO:0007052,GO:0008092,GO:0008104,GO:0008150,GO:0008274,GO:0009987,GO:0015630,GO:0015631,GO:0016043,GO:0022402,GO:0022607,GO:0031021,GO:…	-	ko:K18633	-	-	-	-	ko00000,ko04812	-	-	-	MOZART1
LOC119646511	92.3138	113.817	122.51	82.579	56.6747	52.0361	92.285	80.448	78.4762	97.5585	69.1354	35.7498	87.0795	38.9061	66.0184	86.9676	116.106	96.0575	140.455	142.689	109.893	109.567	117.389	119.137	121.345	93.3147	109.24	118.428	XP_037903014.1	7230.FBpp0166197	2.29e-71	216	2BJPB@1|root,2S1GR@2759|Eukaryota,3A4MS@33154|Opisthokonta,3BRQM@33208|Metazoa,3D8MI@33213|Bilateria,42088@6656|Arthropoda,3SMYF@50557|Insecta,452XB@7147|Diptera,45UCW@7214|Drosophilidae	33208|Metazoa	-	-	-	-	-	-	-	-	-	-	-	-	-	-	-
LOC119646512	30.883	78.6742	88.3699	166.061	27.3587	116.372	95.6899	89.8869	60.1667	100.231	120.79	50.189	44.2587	76.6261	62.7069	73.0269	288.123	249.715	164.047	177.57	163.926	185.052	98.3905	333.502	34.9056	131.454	153.258	102.589	XP_037902897.1	7217.FBpp0114387	2.14e-206	587	KOG4564@1|root,KOG4564@2759|Eukaryota,38EUZ@33154|Opisthokonta,3BIY2@33208|Metazoa,3CX86@33213|Bilateria,41TJM@6656|Arthropoda,3SHM0@50557|Insecta,4506K@7147|Diptera,45TE0@7214|Drosophilidae	33208|Metazoa	T	receptor activity. It is involved in the biological process described with G-protein coupled receptor signaling pathway	CALCRL	GO:0000323,GO:0001525,GO:0001568,GO:0001605,GO:0001635,GO:0001653,GO:0001669,GO:0001756,GO:0001932,GO:0001934,GO:0001944,GO:0002376,GO:0002520,GO:0002521,GO:0002573,GO:0003002,GO:0003674,GO:0004888,GO:0004930,GO:0004948,GO:0005215,GO:0005488,GO:0005575,GO:0005622,GO:0005623,GO:0005737,GO:0005764,GO:0005768,GO:0005773,GO:0005783,GO:0005886,GO:0005887,GO:0005929,GO:0006810,GO:0006811,GO:0006812,GO:…	-	ko:K04576,ko:K04577	ko04080,ko04270,ko04380,map04080,map04270,map04380	-	-	-	ko00000,ko00001,ko04030	-	-	-	7tm_2,HRM
LOC119646513	22.3389	45.1415	37.0386	18.7779	22.4846	20.707	22.8855	27.1676	31.4763	11.142	11.722	20.1949	23.1179	16.0028	25.0032	23.8086	24.7096	14.0453	26.3227	25.0454	21.0664	14.742	13.6907	17.1244	19.1177	9.24554	30.3561	22.5587	XP_037902898.1	7370.XP_005180968.1	2.4e-101	319	KOG2651@1|root,KOG2651@2759|Eukaryota,3A2CI@33154|Opisthokonta,3BQGE@33208|Metazoa,3D77T@33213|Bilateria,41ZM3@6656|Arthropoda,3SMVZ@50557|Insecta,452VE@7147|Diptera	33208|Metazoa	A	rRNA (adenine-N6,N6-)-dimethyltransferase activity. It is involved in the biological process described with rRNA modification	-	-	-	-	-	-	-	-	-	-	-	-	Methyltransf_32
LOC119646515	1372.95	2172.6	3394.52	1911	1471.06	1458.18	1749.25	1545.85	3097.82	2327.42	1707.28	2378.47	2490.75	1209.91	1772.15	3540.57	2135.19	2041.56	1854.81	2216.39	1880.41	1661.37	1314.54	1763.68	1799.46	1608.5	1839.44	1636.41	XP_037902899.1	7165.AGAP006996-PA	2.47e-274	758	COG0050@1|root,KOG0460@2759|Eukaryota,38BHM@33154|Opisthokonta,3BE5J@33208|Metazoa,3CUKG@33213|Bilateria,41VN7@6656|Arthropoda,3SFX6@50557|Insecta,4526Y@7147|Diptera,45GUA@7148|Nematocera	33208|Metazoa	J	This protein promotes the GTP-dependent binding of aminoacyl-tRNA to the A-site of ribosomes during protein biosynthesis	TUFM	GO:0000278,GO:0003674,GO:0003676,GO:0003723,GO:0003746,GO:0003824,GO:0003924,GO:0005488,GO:0005575,GO:0005622,GO:0005623,GO:0005737,GO:0005739,GO:0005740,GO:0005743,GO:0005759,GO:0006412,GO:0006414,GO:0006518,GO:0006807,GO:0006996,GO:0007030,GO:0007049,GO:0008135,GO:0008150,GO:0008152,GO:0008283,GO:0009058,GO:0009059,GO:0009295,GO:0009636,GO:0009987,GO:0010033,GO:0010256,GO:0010467,GO:0016020,GO:…	-	ko:K02358	-	-	-	-	ko00000,ko03012,ko03029,ko04147	-	-	-	GTP_EFTU,GTP_EFTU_D2,GTP_EFTU_D3
LOC119646516	7584.92	4933.65	4376.09	7496.47	6817.51	7478.99	4724.37	4682.06	5527.11	7312.6	6167.01	6352.81	5117.36	8244.54	4475.05	5003.89	5924.12	5918.64	5275.05	5327.93	5652.46	6273.65	7739.27	6138.88	6474.27	5929.29	5965.44	6340.66	XP_037902902.1	132113.XP_003492137.1	3.26e-130	373	COG1100@1|root,KOG0393@2759|Eukaryota,38B7E@33154|Opisthokonta,3BG87@33208|Metazoa,3CUE7@33213|Bilateria,41TC5@6656|Arthropoda,3SIUJ@50557|Insecta,46EDW@7399|Hymenoptera	33208|Metazoa	U	Rho (Ras homology) subfamily of Ras-like small GTPases	RHOA	GO:0000003,GO:0000166,GO:0000226,GO:0000278,GO:0000280,GO:0000281,GO:0000902,GO:0000904,GO:0000910,GO:0000912,GO:0000915,GO:0001101,GO:0001501,GO:0001503,GO:0001558,GO:0001654,GO:0001655,GO:0001666,GO:0001667,GO:0001700,GO:0001703,GO:0001726,GO:0001736,GO:0001738,GO:0001745,GO:0001775,GO:0001882,GO:0001883,GO:0001932,GO:0001934,GO:0001952,GO:0001990,GO:0001998,GO:0002009,GO:0002011,GO:0002034,GO:…	-	ko:K04513,ko:K07857	ko04011,ko04014,ko04015,ko04022,ko04024,ko04062,ko04071,ko04072,ko04144,ko04150,ko04270,ko04310,ko04350,ko04360,ko04510,ko04520,ko04530,ko04611,ko04621,ko04660,ko04670,ko04722,ko04810,ko04921,ko04972,ko05100,ko05130,ko05133,ko05152,ko05200,ko05203,ko05205,ko05206,ko05210,ko05418,map04011,map04014,map04015,map04022,map04024,map04062,map04071,map04072,map04144,map04150,map04270,map04310,map04350,ma…	-	-	-	ko00000,ko00001,ko04031,ko04131,ko04147	-	-	-	Ras
LOC119646517	486.895	523.163	393.361	311.072	289.925	376.298	363.052	395.945	424.693	306.804	323.604	416.125	301.137	321.176	466.4	334.88	329.24	502.829	534.276	344.741	372.201	442.683	691.621	382.991	559.498	579.156	566.959	518.368	XP_037902905.1	7213.XP_004536438.1	3.54e-46	166	KOG1911@1|root,KOG1911@2759|Eukaryota,3ADFY@33154|Opisthokonta,3BVYP@33208|Metazoa,3E4NV@33213|Bilateria,42AG7@6656|Arthropoda,3SZXK@50557|Insecta,4595C@7147|Diptera	33208|Metazoa	B	Chromatin organization modifier domain	-	-	-	-	-	-	-	-	-	-	-	-	Chromo
LOC119646518	7107.84	786.901	447.989	3703.88	2258.17	2167.64	537.217	556.508	424.297	972.266	1339.04	1190.43	599.819	2219.88	511.757	397.847	633.572	601.702	603.679	648.701	641.666	688.326	1634.5	730.571	965.421	769.29	559.684	720.414	XP_037902906.1	7159.AAEL002324-PA	3.27e-120	346	KOG3284@1|root,KOG3284@2759|Eukaryota,38D26@33154|Opisthokonta,3BC2W@33208|Metazoa,3D18V@33213|Bilateria,41WK0@6656|Arthropoda,3SFMR@50557|Insecta,450EB@7147|Diptera,45HBX@7148|Nematocera	33208|Metazoa	U	Component of the ESCRT-I complex (endosomal sorting complex required for transport I), a regulator of vesicular trafficking process	VPS28	GO:0000003,GO:0000813,GO:0001654,GO:0003006,GO:0003674,GO:0005488,GO:0005515,GO:0005575,GO:0005622,GO:0005623,GO:0005737,GO:0005768,GO:0005829,GO:0006508,GO:0006511,GO:0006807,GO:0006810,GO:0006886,GO:0006914,GO:0006996,GO:0007010,GO:0007034,GO:0007275,GO:0007276,GO:0007281,GO:0007283,GO:0007286,GO:0007291,GO:0007349,GO:0007399,GO:0007423,GO:0008104,GO:0008150,GO:0008152,GO:0008593,GO:0009056,GO:…	-	ko:K12184	ko04144,map04144	M00409	-	-	ko00000,ko00001,ko00002,ko04131,ko04147	-	-	-	VPS28
LOC119646519	51.7679	100.95	188.698	89.5516	159.683	113.354	244.911	173.728	197.93	204.484	106.054	110.596	319.371	91.7932	260.78	282.632	232.557	375.273	405.931	363.088	480.919	306.179	350.349	287.389	118.823	227.256	366.394	191.008	XP_037902907.1	7370.XP_005192056.1	0	932	KOG3637@1|root,KOG3637@2759|Eukaryota,38CFX@33154|Opisthokonta,3B96W@33208|Metazoa,3CSVN@33213|Bilateria,41VI5@6656|Arthropoda,3SKJ9@50557|Insecta,458AE@7147|Diptera	33208|Metazoa	W	Integrin alpha-ps	ITGA9	GO:0000003,GO:0000902,GO:0000904,GO:0001555,GO:0001667,GO:0001700,GO:0001701,GO:0001704,GO:0001706,GO:0001775,GO:0001890,GO:0001892,GO:0001936,GO:0001938,GO:0001968,GO:0001974,GO:0002009,GO:0002011,GO:0002164,GO:0002376,GO:0002520,GO:0002521,GO:0002682,GO:0002684,GO:0002685,GO:0002687,GO:0002691,GO:0002693,GO:0003006,GO:0003008,GO:0003344,GO:0003366,GO:0003674,GO:0003823,GO:0005488,GO:0005515,GO:…	-	ko:K06483,ko:K06484,ko:K06487,ko:K06584,ko:K06585	ko04145,ko04151,ko04510,ko04512,ko04514,ko04640,ko04670,ko04672,ko04810,ko04919,ko05100,ko05131,ko05133,ko05140,ko05165,ko05200,ko05205,ko05206,ko05222,ko05410,ko05412,ko05414,ko05418,map04145,map04151,map04510,map04512,map04514,map04640,map04670,map04672,map04810,map04919,map05100,map05131,map05133,map05140,map05165,map05200,map05205,map05206,map05222,map05410,map05412,map05414,map05418	-	-	-	ko00000,ko00001,ko04090,ko04131,ko04147,ko04516	-	-	-	FG-GAP,Integrin_alpha2
LOC119646521	287.31	753.328	837.802	676.168	380.458	517.471	748.08	735.261	1175.55	758.78	704.514	704.689	903.42	611.83	924.009	1163.52	886.238	928.284	800.63	947.999	891.777	878.76	629.362	819.819	742.708	698.607	933.625	949.959	XP_037902909.1	7213.XP_004520534.1	3.89e-227	672	COG5236@1|root,KOG2231@2759|Eukaryota,39EZR@33154|Opisthokonta,3BBP3@33208|Metazoa,3CVUU@33213|Bilateria,41U59@6656|Arthropoda,3SHFN@50557|Insecta,452N2@7147|Diptera	33208|Metazoa	O	Zinc ion binding	ZNF598	GO:0003674,GO:0003676,GO:0003723,GO:0003824,GO:0004842,GO:0005488,GO:0006412,GO:0006414,GO:0006417,GO:0006464,GO:0006513,GO:0006518,GO:0006807,GO:0008150,GO:0008152,GO:0008270,GO:0009058,GO:0009059,GO:0009889,GO:0009987,GO:0010467,GO:0010468,GO:0010556,GO:0010608,GO:0016567,GO:0016740,GO:0019222,GO:0019538,GO:0019787,GO:0031323,GO:0031326,GO:0032268,GO:0032446,GO:0034248,GO:0034641,GO:0034645,GO:…	2.3.2.27	ko:K22381	-	-	-	-	ko00000,ko01000,ko04121	-	-	-	zf-C3HC4_3
LOC119646522	1259.65	866.724	887.8	1441.14	928.318	1159.7	866.894	819.821	871.796	1030.96	1193.03	873.301	1016.37	1929.82	953.582	820.042	721.812	679.073	577.316	705.647	904.914	829.29	590.363	765.183	981.454	690.532	647.785	812.147	XP_037902915.1	7213.XP_004521126.1	3.11e-190	534	COG5273@1|root,KOG1315@2759|Eukaryota,38BXK@33154|Opisthokonta,3BB3W@33208|Metazoa,3CRFU@33213|Bilateria,41VZF@6656|Arthropoda,3SJEI@50557|Insecta,44ZYQ@7147|Diptera	33208|Metazoa	S	Belongs to the DHHC palmitoyltransferase family	ZDHHC2	GO:0000139,GO:0003674,GO:0003824,GO:0005488,GO:0005575,GO:0005622,GO:0005623,GO:0005737,GO:0005768,GO:0005783,GO:0005794,GO:0005886,GO:0005887,GO:0006464,GO:0006497,GO:0006807,GO:0006996,GO:0007275,GO:0007399,GO:0007417,GO:0007420,GO:0008104,GO:0008150,GO:0008152,GO:0008270,GO:0009058,GO:0009059,GO:0009987,GO:0010008,GO:0012505,GO:0016020,GO:0016021,GO:0016043,GO:0016050,GO:0016188,GO:0016409,GO:…	2.3.1.225	ko:K20028	-	-	-	-	ko00000,ko01000,ko04131	-	-	-	DHHC
LOC119646523	306.506	1016.86	820.41	271.505	437.66	398.568	672.627	669.928	785.786	570.466	637.554	359.803	655.094	354.353	789.835	762.544	716.469	745.29	938.782	832.984	803.119	681.785	401.913	742.183	587.347	522.716	769.32	881.645	XP_037902930.1	7176.CPIJ008053-PA	2.12e-142	475	COG5222@1|root,KOG0314@2759|Eukaryota,39G1W@33154|Opisthokonta,3BH3Z@33208|Metazoa,3CWGY@33213|Bilateria,41XXW@6656|Arthropoda,3SJWR@50557|Insecta,44Y1K@7147|Diptera,45EW3@7148|Nematocera	33208|Metazoa	O	zinc finger	RBBP6	GO:0000209,GO:0001654,GO:0001701,GO:0001745,GO:0003674,GO:0003824,GO:0004842,GO:0005488,GO:0005515,GO:0005575,GO:0005622,GO:0005623,GO:0005634,GO:0005654,GO:0005694,GO:0005730,GO:0005737,GO:0005815,GO:0005829,GO:0005856,GO:0006275,GO:0006464,GO:0006508,GO:0006511,GO:0006807,GO:0006915,GO:0006950,GO:0006974,GO:0007275,GO:0007423,GO:0008150,GO:0008152,GO:0008219,GO:0008270,GO:0008283,GO:0009056,GO:…	2.3.2.27	ko:K10624	-	-	-	-	ko00000,ko01000,ko04121	-	-	-	DWNN,U-box,zf-CCHC,zf-CCHC_2
LOC119646524	75.5259	124.568	144.201	128.551	119.69	204.745	225.496	380.843	197.109	211.592	69.3424	163.27	102.339	85.382	228.742	165.893	200.581	302.532	171.21	407.342	200.249	140.185	57.3591	320.746	294.997	241.147	154.003	99.9309	XP_037902916.1	7159.AAEL001451-PA	2.08e-39	147	COG5125@1|root,KOG2866@2759|Eukaryota,39GJI@33154|Opisthokonta,3BF2I@33208|Metazoa,3CYZH@33213|Bilateria,4213U@6656|Arthropoda,3SP8B@50557|Insecta,453X0@7147|Diptera,45II2@7148|Nematocera	33208|Metazoa	S	DNA repair protein Rad62	NSMCE4A	GO:0000793,GO:0005575,GO:0005622,GO:0005623,GO:0005634,GO:0005654,GO:0005694,GO:0005730,GO:0006139,GO:0006259,GO:0006281,GO:0006725,GO:0006807,GO:0006950,GO:0006974,GO:0008150,GO:0008152,GO:0009987,GO:0016604,GO:0030915,GO:0031974,GO:0031981,GO:0032991,GO:0033554,GO:0034641,GO:0043170,GO:0043226,GO:0043227,GO:0043228,GO:0043229,GO:0043231,GO:0043232,GO:0043233,GO:0044237,GO:0044238,GO:0044260,GO:…	-	-	-	-	-	-	-	-	-	-	Nse4-Nse3_bdg,Nse4_C
LOC119646525	227.43	119.361	95.6054	249.894	183.138	226.512	117.917	121.151	130.883	112.454	117.316	122.06	112.303	120.536	107.611	104.45	152.618	135.358	143.543	101.724	256.691	132.83	267.672	104.562	125.525	197.904	166.221	153.866	XP_037902917.1	7213.XP_004524647.1	1.75e-119	345	COG1100@1|root,KOG0098@2759|Eukaryota,39Z6V@33154|Opisthokonta,3BDPZ@33208|Metazoa,3D1MY@33213|Bilateria,41XE9@6656|Arthropoda,3SIY1@50557|Insecta,452NI@7147|Diptera	33208|Metazoa	U	GTP binding. It is involved in the biological process described with small GTPase mediated signal transduction	-	GO:0003674,GO:0003824,GO:0003924,GO:0005575,GO:0005622,GO:0005623,GO:0005737,GO:0005794,GO:0006810,GO:0006996,GO:0007154,GO:0007165,GO:0007264,GO:0007265,GO:0008150,GO:0009987,GO:0012505,GO:0016043,GO:0016192,GO:0016462,GO:0016787,GO:0016817,GO:0016818,GO:0017111,GO:0023052,GO:0031982,GO:0032482,GO:0034389,GO:0035556,GO:0036477,GO:0043025,GO:0043226,GO:0043227,GO:0043229,GO:0043231,GO:0044297,GO:…	-	-	-	-	-	-	-	-	-	-	Ras
LOC119646526	564.762	600.914	593.548	670.207	341.438	649.476	263.319	320.04	1508.2	688.532	640.359	1233.4	740.391	817.44	725.636	1752.62	273.256	275.746	409.391	379.602	234.462	405.085	325.265	282.032	459.566	516.579	361.905	403.721	XP_037902918.1	7213.XP_004535837.1	5.08e-212	621	COG0144@1|root,KOG1122@2759|Eukaryota,38DFV@33154|Opisthokonta,3BEH5@33208|Metazoa,3CR9Y@33213|Bilateria,41X0V@6656|Arthropoda,3SG28@50557|Insecta,4503A@7147|Diptera	33208|Metazoa	A	Belongs to the class I-like SAM-binding methyltransferase superfamily. RsmB NOP family	NOP2	GO:0000027,GO:0000154,GO:0000470,GO:0001510,GO:0003674,GO:0003824,GO:0005575,GO:0005622,GO:0005623,GO:0005634,GO:0005654,GO:0005730,GO:0006139,GO:0006355,GO:0006357,GO:0006364,GO:0006396,GO:0006725,GO:0006807,GO:0006996,GO:0008150,GO:0008152,GO:0008168,GO:0008169,GO:0008173,GO:0008284,GO:0008649,GO:0008757,GO:0009383,GO:0009451,GO:0009889,GO:0009966,GO:0009987,GO:0010467,GO:0010468,GO:0010556,GO:…	2.1.1.310	ko:K14835	-	-	-	-	ko00000,ko01000,ko03009	-	-	-	Methyltr_RsmB-F,Methyltr_RsmF_N,P120R
LOC119646527	488.123	339.857	277.346	765.58	464.402	574.724	339.607	470.864	292.428	317.141	423.42	343.373	367.5	552.489	397.01	261.125	329.947	292.445	281.057	278.77	300.085	338.592	366.573	322.73	265.201	359.804	341.582	310.126	XP_037902919.1	7159.AAEL006460-PA	1.28e-163	464	KOG3606@1|root,KOG3606@2759|Eukaryota,38FAD@33154|Opisthokonta,3B9VV@33208|Metazoa,3CXWX@33213|Bilateria,41VN6@6656|Arthropoda,3SJEX@50557|Insecta,450DY@7147|Diptera,45HSP@7148|Nematocera	33208|Metazoa	T	PB1 domain	PARD6B	GO:0000003,GO:0000226,GO:0000278,GO:0000902,GO:0000904,GO:0001667,GO:0001738,GO:0001763,GO:0001932,GO:0001933,GO:0002009,GO:0002064,GO:0002065,GO:0002066,GO:0003002,GO:0003006,GO:0003674,GO:0005080,GO:0005488,GO:0005515,GO:0005575,GO:0005622,GO:0005623,GO:0005634,GO:0005737,GO:0005813,GO:0005815,GO:0005829,GO:0005856,GO:0005886,GO:0005911,GO:0005923,GO:0005938,GO:0006469,GO:0006928,GO:0006996,GO:…	-	ko:K06093	ko04015,ko04144,ko04360,ko04390,ko04391,ko04530,ko05165,map04015,map04144,map04360,map04390,map04391,map04530,map05165	-	-	-	ko00000,ko00001,ko03036	-	-	-	PB1,PDZ
LOC119646528	208.084	153.527	113.82	197.889	98.6286	172.978	106.517	127.503	231.097	168.131	197.537	173.845	151.909	265.661	154.905	215.813	58.14	116.188	107.694	94.263	65.8383	96.3469	146.894	98.2349	111.377	110.936	149.496	120.049	XP_037902920.1	7213.XP_004522721.1	3.32e-259	724	COG0513@1|root,KOG0340@2759|Eukaryota,38C0R@33154|Opisthokonta,3BE6I@33208|Metazoa,3D0CB@33213|Bilateria,41VP8@6656|Arthropoda,3SJDY@50557|Insecta,450DC@7147|Diptera	33208|Metazoa	A	Belongs to the DEAD box helicase family	DDX49	GO:0003674,GO:0003724,GO:0003824,GO:0004004,GO:0004386,GO:0005575,GO:0005622,GO:0005623,GO:0005634,GO:0005654,GO:0005730,GO:0005737,GO:0006139,GO:0006364,GO:0006396,GO:0006725,GO:0006807,GO:0008026,GO:0008150,GO:0008152,GO:0008186,GO:0009987,GO:0010467,GO:0010501,GO:0016070,GO:0016072,GO:0016462,GO:0016787,GO:0016817,GO:0016818,GO:0016887,GO:0017111,GO:0022613,GO:0031974,GO:0031981,GO:0034470,GO:…	3.6.4.13	ko:K14778	-	-	-	-	ko00000,ko01000,ko03009	-	-	-	DEAD,Helicase_C
LOC119646529	120.16	161.259	111.818	306.219	888.361	120.615	368.039	74.229	382.659	305.835	180.688	209.827	160.148	246.484	307.814	32.2568	40.6979	225.976	159.177	537.325	31.6074	36.2415	107.589	419.937	252.657	4.62147	325.521	184.52	XP_037902921.1	7159.AAEL009126-PA	6.84e-181	523	COG2124@1|root,KOG0158@2759|Eukaryota,38BTY@33154|Opisthokonta,3BF8S@33208|Metazoa,3CV2F@33213|Bilateria,41VYX@6656|Arthropoda,3SK5P@50557|Insecta,458DN@7147|Diptera,45MJX@7148|Nematocera	33208|Metazoa	Q	cytochrome P450	Cyp6a9	GO:0002118,GO:0003674,GO:0003824,GO:0004497,GO:0005575,GO:0005622,GO:0005623,GO:0005737,GO:0005783,GO:0005789,GO:0006082,GO:0006091,GO:0006629,GO:0006631,GO:0006805,GO:0006950,GO:0006952,GO:0007610,GO:0008150,GO:0008152,GO:0009055,GO:0009266,GO:0009404,GO:0009410,GO:0009605,GO:0009607,GO:0009617,GO:0009628,GO:0009636,GO:0009987,GO:0010033,GO:0010243,GO:0012505,GO:0014070,GO:0014074,GO:0016020,GO:…	-	ko:K14999,ko:K15003	-	-	-	-	ko00000,ko00199,ko01000	-	-	-	p450
LOC119646530	0	1.38949	3.36784	10.1125	5.19122	208.329	345.119	0	4.97053	4.05196	262.878	1.75626	4.12857	845.1	266.075	0.768124	4.3611	2.55396	2.39348	2.94629	2.63384	0	1.82516	0	0	0	0	13.6987	XP_037902923.1	7176.CPIJ019702-PA	5.12e-172	501	COG2124@1|root,KOG0158@2759|Eukaryota,38BTY@33154|Opisthokonta,3BF8S@33208|Metazoa,3CV2F@33213|Bilateria,41VYX@6656|Arthropoda,3SGMH@50557|Insecta,44XUS@7147|Diptera,45FWK@7148|Nematocera	33208|Metazoa	Q	cytochrome P450	Cyp6a9	GO:0002118,GO:0003674,GO:0003824,GO:0004497,GO:0005575,GO:0005622,GO:0005623,GO:0005737,GO:0005783,GO:0005789,GO:0006082,GO:0006091,GO:0006629,GO:0006631,GO:0006805,GO:0006950,GO:0006952,GO:0007610,GO:0008150,GO:0008152,GO:0009055,GO:0009266,GO:0009404,GO:0009410,GO:0009605,GO:0009607,GO:0009617,GO:0009628,GO:0009636,GO:0009987,GO:0010033,GO:0010243,GO:0012505,GO:0014070,GO:0014074,GO:0016020,GO:…	-	ko:K14999,ko:K15003	-	-	-	-	ko00000,ko00199,ko01000	-	-	-	p450
LOC119646532	2300.33	1471.18	1086.82	1276.9	1109.94	1013.34	1066.71	1130.38	972.475	1020.07	896.18	1222.28	990.822	875.834	1034.01	1010.71	816.87	992.143	1018.11	857.661	1299.43	876.968	1228.04	804.885	1033.23	1526.58	1100.46	1122.25	XP_037902926.1	7370.XP_005187389.1	1.41e-130	387	KOG2086@1|root,KOG2086@2759|Eukaryota,38GGJ@33154|Opisthokonta,3BF67@33208|Metazoa,3CTD1@33213|Bilateria,41XED@6656|Arthropoda,3SH58@50557|Insecta,44Z0D@7147|Diptera	33208|Metazoa	Y	nuclear envelope reassembly	NSFL1C	GO:0000045,GO:0000132,GO:0000226,GO:0000278,GO:0000922,GO:0001654,GO:0001745,GO:0001751,GO:0001754,GO:0003674,GO:0005488,GO:0005515,GO:0005575,GO:0005622,GO:0005623,GO:0005634,GO:0005654,GO:0005737,GO:0005813,GO:0005815,GO:0005819,GO:0005829,GO:0005856,GO:0005886,GO:0006508,GO:0006511,GO:0006807,GO:0006914,GO:0006996,GO:0006997,GO:0006998,GO:0007010,GO:0007017,GO:0007030,GO:0007033,GO:0007049,GO:…	-	ko:K14012	ko04141,map04141	-	-	-	ko00000,ko00001	-	-	-	SEP,UBA_4,UBX
LOC119646533	2410.75	731.727	852.666	3430.73	1689.58	1202.72	605.107	733.517	871.552	888.811	826.727	1663.5	1276.16	1995.2	603.549	1112.85	662.805	590.07	544.007	575.735	772.376	538.201	852.97	585.154	671.816	618.981	500.31	569.429	XP_037902927.1	7213.XP_004521834.1	5.54e-129	375	COG0088@1|root,KOG1624@2759|Eukaryota,38BG5@33154|Opisthokonta,3BF2T@33208|Metazoa,3CUTH@33213|Bilateria,41WDT@6656|Arthropoda,3SJXU@50557|Insecta,4504W@7147|Diptera	33208|Metazoa	J	Structural constituent of ribosome. It is involved in the biological process described with translation	MRPL4	GO:0000313,GO:0000315,GO:0003674,GO:0003676,GO:0003723,GO:0003735,GO:0005198,GO:0005488,GO:0005575,GO:0005622,GO:0005623,GO:0005737,GO:0005739,GO:0005740,GO:0005743,GO:0005759,GO:0005761,GO:0005762,GO:0005829,GO:0005840,GO:0006412,GO:0006414,GO:0006415,GO:0006518,GO:0006807,GO:0008150,GO:0008152,GO:0009058,GO:0009059,GO:0009987,GO:0010467,GO:0015934,GO:0016020,GO:0016043,GO:0019538,GO:0019866,GO:…	-	ko:K02926	ko03010,map03010	M00178	-	-	br01610,ko00000,ko00001,ko00002,ko03011	-	-	-	Ribosomal_L4
LOC119646535	64.8135	157.748	233.092	96.6935	53.8724	104.088	174.399	93.9621	186.481	190.244	121.629	133.325	133.769	92.137	147.777	182.162	228.243	167.253	77.6809	94.6897	200.646	250.68	79.7156	155.65	168.601	117.999	214.445	206.988	XP_037902932.1	7222.FBpp0155332	1.44e-225	666	COG1524@1|root,KOG2124@2759|Eukaryota,38EK1@33154|Opisthokonta,3B9XA@33208|Metazoa,3D0G4@33213|Bilateria,41U6V@6656|Arthropoda,3SK5N@50557|Insecta,44Y33@7147|Diptera,45NKX@7214|Drosophilidae	33208|Metazoa	T	Transferase activity. It is involved in the biological process described with GPI anchor biosynthetic process	PIGN	GO:0003674,GO:0003824,GO:0005575,GO:0005622,GO:0005623,GO:0005737,GO:0005783,GO:0005789,GO:0005829,GO:0005886,GO:0006464,GO:0006497,GO:0006505,GO:0006506,GO:0006629,GO:0006643,GO:0006644,GO:0006650,GO:0006661,GO:0006664,GO:0006793,GO:0006796,GO:0006807,GO:0008150,GO:0008152,GO:0008610,GO:0008654,GO:0009058,GO:0009059,GO:0009247,GO:0009987,GO:0012505,GO:0016020,GO:0016021,GO:0016254,GO:0016740,GO:…	-	ko:K05285,ko:K06626	ko00563,ko01100,ko04110,ko04114,ko04115,ko04151,ko04218,ko04391,ko04934,ko05161,ko05162,ko05165,ko05200,ko05203,ko05206,ko05215,ko05222,ko05226,map00563,map01100,map04110,map04114,map04115,map04151,map04218,map04391,map04934,map05161,map05162,map05165,map05200,map05203,map05206,map05215,map05222,map05226	M00065,M00692	R05920	RC00017	ko00000,ko00001,ko00002,ko01000,ko03032,ko03036	-	-	-	Phosphodiest,PigN
LOC119646536	365.915	624.641	658.477	579.379	380.063	582.853	686.573	628.947	930.576	581.23	633.321	763.582	601.181	612.884	745.152	719.816	647.839	672.91	529.248	765.576	582.337	796.502	481.211	632.668	801.885	575.954	685.572	696.434	XP_037902933.1	7213.XP_004526515.1	2.25e-157	473	COG1184@1|root,KOG1467@2759|Eukaryota,38CIH@33154|Opisthokonta,3BCWI@33208|Metazoa,3D0H4@33213|Bilateria,41WQD@6656|Arthropoda,3SJBD@50557|Insecta,44X7S@7147|Diptera	33208|Metazoa	J	Belongs to the eIF-2B alpha beta delta subunits family	EIF2B4	GO:0000003,GO:0001541,GO:0002253,GO:0002376,GO:0002429,GO:0002682,GO:0002684,GO:0002757,GO:0002764,GO:0002768,GO:0003006,GO:0003674,GO:0003676,GO:0003723,GO:0003743,GO:0005085,GO:0005488,GO:0005515,GO:0005575,GO:0005622,GO:0005623,GO:0005737,GO:0005829,GO:0005851,GO:0006412,GO:0006413,GO:0006417,GO:0006518,GO:0006807,GO:0006950,GO:0006979,GO:0007154,GO:0007165,GO:0007166,GO:0007272,GO:0007275,GO:…	-	ko:K03680	ko03013,map03013	-	-	-	ko00000,ko00001,ko03012	-	-	-	IF-2B
LOC119646537	150657	22945.5	19323	102379	125479	87779.6	25661.1	32319.7	33325.8	48487.6	49922.4	76200.8	33296.2	85914.2	25307	27173.6	24798	22163.4	21206.8	23015.6	31094.6	28816.4	80261	27683.6	24194	30310.8	17506.7	18632.3	XP_037902936.1	7244.FBpp0232340	2.47e-112	327	COG4352@1|root,KOG3295@2759|Eukaryota,39QV9@33154|Opisthokonta,3BJ7T@33208|Metazoa,3D0KP@33213|Bilateria,41WKK@6656|Arthropoda,3SH30@50557|Insecta,452J0@7147|Diptera,45V3B@7214|Drosophilidae	33208|Metazoa	J	Structural constituent of ribosome. It is involved in the biological process described with	RPL13	GO:0000184,GO:0000956,GO:0001889,GO:0002181,GO:0003674,GO:0003676,GO:0003723,GO:0003735,GO:0005198,GO:0005488,GO:0005575,GO:0005622,GO:0005623,GO:0005634,GO:0005730,GO:0005737,GO:0005783,GO:0005829,GO:0005840,GO:0006139,GO:0006401,GO:0006402,GO:0006412,GO:0006413,GO:0006518,GO:0006605,GO:0006612,GO:0006613,GO:0006614,GO:0006725,GO:0006807,GO:0006810,GO:0006886,GO:0007275,GO:0008104,GO:0008150,GO:…	-	ko:K02873	ko03010,map03010	M00177,M00179	-	-	br01610,ko00000,ko00001,ko00002,ko03011	-	-	-	Ribosomal_L13e
LOC119646538	338.488	375.123	331.535	144.439	130.111	148.687	217.574	234.376	451.36	280.43	268.995	251.048	236.862	197.449	232.226	358.666	181.686	234.875	292.142	244.096	220.014	266.776	259.46	233.349	263.417	211.576	288.278	363.462	XP_037902937.1	7213.XP_004527252.1	4.52e-206	614	KOG1010@1|root,KOG1010@2759|Eukaryota,38C3E@33154|Opisthokonta,3B9FR@33208|Metazoa,3CTY8@33213|Bilateria,41UH6@6656|Arthropoda,3SITE@50557|Insecta,44XR1@7147|Diptera	33208|Metazoa	D	It is involved in the biological process described with regulation of	RBL1	GO:0000003,GO:0000070,GO:0000075,GO:0000077,GO:0000122,GO:0000278,GO:0000280,GO:0000785,GO:0000819,GO:0001012,GO:0001067,GO:0002064,GO:0002065,GO:0002066,GO:0002119,GO:0002164,GO:0003006,GO:0003674,GO:0003676,GO:0003677,GO:0003682,GO:0005488,GO:0005515,GO:0005575,GO:0005622,GO:0005623,GO:0005634,GO:0005654,GO:0005667,GO:0005694,GO:0005730,GO:0005737,GO:0005829,GO:0006139,GO:0006259,GO:0006260,GO:…	-	ko:K04681,ko:K07605,ko:K16332	ko04068,ko04110,ko04151,ko04218,ko04350,ko05165,ko05203,map04068,map04110,map04151,map04218,map04350,map05165,map05203	M00692	-	-	ko00000,ko00001,ko00002,ko03000,ko04147,ko04812	-	-	-	DUF3452,RB_A,RB_B,Rb_C
LOC119646539	0	9.6693	20.1887	7.23746	25.7227	17.0552	8.79795	23.9373	22.4299	15.2517	0	24.6596	11.5955	0	2.08046	22.3121	0	0	61.0068	0	0	0	5.5377	0	0	0	19.0365	0	XP_037902938.1	7245.FBpp0258436	5.62e-13	72	2BZKA@1|root,2T840@2759|Eukaryota,392J6@33154|Opisthokonta,3C7XW@33208|Metazoa,3DNYF@33213|Bilateria,4257H@6656|Arthropoda,3SSDN@50557|Insecta,45439@7147|Diptera,45TYA@7214|Drosophilidae	33208|Metazoa	S	odorant binding	Obp49a	GO:0003008,GO:0003674,GO:0005488,GO:0005549,GO:0005575,GO:0005576,GO:0007600,GO:0007606,GO:0008150,GO:0032501,GO:0050877	-	-	-	-	-	-	-	-	-	-	PBP_GOBP
LOC119646540	2405.29	643.843	788.111	1943.01	1316.84	1041.64	495.764	409.214	750.075	961.299	993.606	1282.79	594.903	1156.72	479.69	645.108	547.84	373.085	362.13	459.888	489.018	426.728	841.49	414.972	503.986	555.619	481.555	404.833	XP_037902939.1	7159.AAEL004527-PA	1.21e-102	303	COG0049@1|root,KOG3291@2759|Eukaryota,38HF4@33154|Opisthokonta,3BDUG@33208|Metazoa,3D1W1@33213|Bilateria,41YYR@6656|Arthropoda,3SMA0@50557|Insecta,4531B@7147|Diptera,45HGF@7148|Nematocera	33208|Metazoa	J	Ribosomal protein S7p/S5e	MRPS7	GO:0000028,GO:0000313,GO:0000314,GO:0003674,GO:0003676,GO:0003723,GO:0003729,GO:0003735,GO:0005198,GO:0005488,GO:0005575,GO:0005622,GO:0005623,GO:0005737,GO:0005739,GO:0005740,GO:0005743,GO:0005759,GO:0005761,GO:0005763,GO:0005840,GO:0006412,GO:0006414,GO:0006415,GO:0006518,GO:0006807,GO:0006996,GO:0008150,GO:0008152,GO:0009058,GO:0009059,GO:0009987,GO:0010467,GO:0015935,GO:0016020,GO:0016043,GO:…	-	ko:K02992	ko03010,map03010	M00178,M00179	-	-	br01610,ko00000,ko00001,ko00002,ko03011	-	-	-	Ribosomal_S7
LOC119646541	464.674	116.883	156.013	371.266	259.618	229.993	125.703	81.2243	167.418	216.998	245.645	304.001	119.805	337.956	110.915	208.125	90.0958	67.7165	58.5637	72.4532	94.6507	103.817	175.254	59.5383	108.114	106.49	105.576	58.754	XP_037902941.1	7245.FBpp0257534	6.36e-33	123	2BD24@1|root,2S11D@2759|Eukaryota,3A13Z@33154|Opisthokonta,3BQRJ@33208|Metazoa,3D6IJ@33213|Bilateria,421NW@6656|Arthropoda,3SQ66@50557|Insecta,454GM@7147|Diptera,45WG7@7214|Drosophilidae	33208|Metazoa	-	-	TMEM186	GO:0005575,GO:0005622,GO:0005623,GO:0005737,GO:0005739,GO:0043226,GO:0043227,GO:0043229,GO:0043231,GO:0044424,GO:0044444,GO:0044464	-	-	-	-	-	-	-	-	-	-	TMEM223
LOC119646543	69.7489	70.0722	48.4724	40.4455	10.3627	45.0559	29.9166	13.5751	62.1293	31.408	48.6154	92.2065	16.516	63.9984	31.2379	62.9774	23.2562	26.8171	37.079	28.0173	34.2231	23.8502	90.4692	27.0431	34.084	43.4684	28.8433	53.9722	XP_037902943.1	7159.AAEL004574-PA	6.28e-78	237	KOG2612@1|root,KOG2612@2759|Eukaryota,38FJF@33154|Opisthokonta,3BK0J@33208|Metazoa,3CTCX@33213|Bilateria,41YN0@6656|Arthropoda,3SMDV@50557|Insecta,45419@7147|Diptera,45G2A@7148|Nematocera	33208|Metazoa	K	Component of the transcription regulatory histone acetylation (HAT) complex SAGA, a multiprotein complex that activates transcription by remodeling chromatin and mediating histone acetylation and deubiquitination. Within the SAGA complex, participates in a subcomplex that specifically deubiquitinates histone H2B. The SAGA complex is recruited to specific gene promoters by activators, where it is …	ATXN7L3	GO:0000123,GO:0000124,GO:0003674,GO:0003712,GO:0003713,GO:0005488,GO:0005515,GO:0005575,GO:0005622,GO:0005623,GO:0005634,GO:0005654,GO:0006325,GO:0006355,GO:0006464,GO:0006508,GO:0006513,GO:0006807,GO:0006996,GO:0008150,GO:0008152,GO:0009889,GO:0009891,GO:0009893,GO:0009987,GO:0010390,GO:0010468,GO:0010556,GO:0010557,GO:0010604,GO:0010628,GO:0016043,GO:0016567,GO:0016569,GO:0016570,GO:0016574,GO:…	-	ko:K11363	-	-	-	-	ko00000,ko03021,ko03036	-	-	-	SCA7,Sgf11
LOC119646544	8284.34	1487.11	1450.7	7433.84	7015.77	4916.88	1904.75	2540.15	2468.01	4389.59	3005.49	5350.8	2216.96	5270.04	1318.36	2008.82	1743.73	1535.9	1833.88	1664.5	1366.79	1188.4	5590.93	1663.77	1628.93	1884.62	1552.2	1064.13	XP_037902944.1	7213.XP_004521002.1	2.44e-56	177	KOG3468@1|root,KOG3468@2759|Eukaryota,3A3ZB@33154|Opisthokonta,3BREI@33208|Metazoa,3D9BP@33213|Bilateria,420FA@6656|Arthropoda,3SN8G@50557|Insecta,453Q7@7147|Diptera	33208|Metazoa	C	NADH dehydrogenase (ubiquinone) activity	NDUFB7	GO:0003674,GO:0003824,GO:0003954,GO:0005575,GO:0005622,GO:0005623,GO:0005737,GO:0005739,GO:0005740,GO:0005743,GO:0005746,GO:0005747,GO:0005758,GO:0006091,GO:0006119,GO:0006120,GO:0006139,GO:0006163,GO:0006725,GO:0006753,GO:0006793,GO:0006796,GO:0006807,GO:0006996,GO:0007005,GO:0008137,GO:0008150,GO:0008152,GO:0009117,GO:0009123,GO:0009126,GO:0009141,GO:0009144,GO:0009150,GO:0009161,GO:0009167,GO:…	-	ko:K03963	ko00190,ko01100,ko04714,ko04723,ko04932,ko05010,ko05012,ko05016,map00190,map01100,map04714,map04723,map04932,map05010,map05012,map05016	M00147	-	-	ko00000,ko00001,ko00002	3.D.1.6	-	-	NDUF_B7
LOC119646545	114.734	198.166	266.136	235.419	298.272	187.971	201.458	232.929	173.18	159.056	311.723	83.0942	297.189	39.5883	149.617	159.661	189.872	222.989	464.013	252.995	92.5963	166.433	260.136	243.683	132.185	226.287	223.7	368.841	XP_037902946.1	7213.XP_004537511.1	0	1536	KOG0039@1|root,KOG0039@2759|Eukaryota,38CNF@33154|Opisthokonta,3BE7B@33208|Metazoa,3CX51@33213|Bilateria,41V4N@6656|Arthropoda,3SJ7G@50557|Insecta,44ZRB@7147|Diptera	33208|Metazoa	PQ	superoxide-generating NADPH oxidase activity. It is involved in the biological process described with	NOX5	GO:0000003,GO:0000166,GO:0000910,GO:0001525,GO:0001568,GO:0001816,GO:0001935,GO:0001944,GO:0002790,GO:0003674,GO:0003824,GO:0005215,GO:0005216,GO:0005261,GO:0005488,GO:0005575,GO:0005622,GO:0005623,GO:0005737,GO:0005783,GO:0005789,GO:0006801,GO:0006810,GO:0006811,GO:0006812,GO:0006915,GO:0006937,GO:0006940,GO:0006950,GO:0006979,GO:0007049,GO:0007275,GO:0007276,GO:0007292,GO:0008104,GO:0008150,GO:…	-	ko:K21424	-	-	-	-	ko00000,ko01000,ko04131	5.B.1.1.5	-	-	EF-hand_1,EF-hand_5,EF-hand_6,EF-hand_7,FAD_binding_8,Ferric_reduct,NAD_binding_6
LOC119646547	333.949	414.385	775.552	2023.34	1299.4	1837.68	1408.93	1040.94	852.46	970.171	4255.99	912.51	972.414	1804.67	1075	1078.35	1189.63	982.527	750.072	1264.36	882.335	973.976	719.509	1569.99	577.668	663.438	638.358	510.182	XP_037902950.1	7370.XP_005189427.1	1.38e-203	575	COG0142@1|root,KOG0776@2759|Eukaryota,38FKG@33154|Opisthokonta,3BEZH@33208|Metazoa,3CRGN@33213|Bilateria,41X1Z@6656|Arthropoda,3SFSE@50557|Insecta,44Y76@7147|Diptera	33208|Metazoa	H	Belongs to the FPP GGPP synthase family	PDSS1	GO:0003674,GO:0003824,GO:0005488,GO:0005515,GO:0005575,GO:0005622,GO:0005623,GO:0005737,GO:0005739,GO:0005740,GO:0005743,GO:0005759,GO:0006629,GO:0006720,GO:0006732,GO:0006733,GO:0006743,GO:0006744,GO:0006950,GO:0007275,GO:0007399,GO:0008150,GO:0008152,GO:0008299,GO:0008610,GO:0009058,GO:0009108,GO:0009987,GO:0010941,GO:0014016,GO:0014019,GO:0016020,GO:0016043,GO:0016740,GO:0016765,GO:0019866,GO:…	2.5.1.91	ko:K12504	ko00900,ko01110,map00900,map01110	-	R09249	RC00279	ko00000,ko00001,ko01000,ko01006	-	-	-	polyprenyl_synt
LOC119646549	953.773	394.556	303.063	752.557	565.755	475.07	328.345	501.627	149.096	278.535	339.021	192.285	296.392	470.501	270.899	192.773	367.736	308.987	262.049	331.417	434.523	406.971	392.362	322.647	603.437	388.284	341.493	538.202	XP_037902955.1	7176.CPIJ014044-PA	5.81e-56	195	2CNWZ@1|root,2S41T@2759|Eukaryota,3A6YZ@33154|Opisthokonta,3BTP1@33208|Metazoa,3DAED@33213|Bilateria,420N6@6656|Arthropoda,3SNWY@50557|Insecta,453SQ@7147|Diptera,45I1H@7148|Nematocera	33208|Metazoa	-	-	spn-F	GO:0000003,GO:0000226,GO:0000578,GO:0003002,GO:0003006,GO:0003674,GO:0003774,GO:0003777,GO:0003824,GO:0005488,GO:0005515,GO:0005575,GO:0005622,GO:0005623,GO:0005737,GO:0005794,GO:0006996,GO:0007010,GO:0007017,GO:0007163,GO:0007275,GO:0007276,GO:0007281,GO:0007292,GO:0007308,GO:0007309,GO:0007314,GO:0007317,GO:0007350,GO:0007351,GO:0007389,GO:0007399,GO:0007423,GO:0008103,GO:0008104,GO:0008150,GO:…	-	-	-	-	-	-	-	-	-	-	-
LOC119646550	138.103	135.982	191.87	306.23	115.717	126.644	127.586	127.397	217.867	179.329	154.227	252.031	141.211	145.063	132.588	180.484	129.362	128.978	119.61	117.967	125.046	76.0929	106.004	137.92	94.7702	133.179	129.036	98.2778	XP_037902956.1	7213.XP_004529391.1	4.43e-105	320	COG0223@1|root,KOG3082@2759|Eukaryota,38GNB@33154|Opisthokonta,3BEGR@33208|Metazoa,3CWI9@33213|Bilateria,41W9Y@6656|Arthropoda,3SK6P@50557|Insecta,452GX@7147|Diptera	33208|Metazoa	J	methionyl-tRNA formyltransferase activity. It is involved in the biological process described with	MTFMT	GO:0003674,GO:0003824,GO:0004479,GO:0005575,GO:0005622,GO:0005623,GO:0005737,GO:0005739,GO:0005759,GO:0006139,GO:0006396,GO:0006399,GO:0006400,GO:0006412,GO:0006413,GO:0006464,GO:0006518,GO:0006725,GO:0006807,GO:0008033,GO:0008150,GO:0008152,GO:0009058,GO:0009059,GO:0009451,GO:0009987,GO:0010467,GO:0016070,GO:0016740,GO:0016741,GO:0016742,GO:0019538,GO:0019988,GO:0031974,GO:0034470,GO:0034641,GO:…	2.1.2.9	ko:K00604	ko00670,ko00970,map00670,map00970	-	R03940	RC00026,RC00165	ko00000,ko00001,ko01000	-	-	-	Formyl_trans_C,Formyl_trans_N
LOC119646551	1078.89	373.052	426.475	2405.2	1282.4	758.255	341.152	232.422	656.326	772.532	660.651	967.27	478.369	950.011	277.382	605.226	191.816	206.952	181.704	218.685	222.219	198.275	445.487	206.541	379.178	276.789	201.24	181.11	XP_037902957.1	7370.XP_005191657.1	5.3e-66	208	COG0333@1|root,KOG4080@2759|Eukaryota,3A2GA@33154|Opisthokonta,3BPSR@33208|Metazoa,3D2B1@33213|Bilateria,41ZA1@6656|Arthropoda,3SMXH@50557|Insecta,453I3@7147|Diptera	33208|Metazoa	J	It is involved in the biological process described with translation	MRPL32	GO:0000313,GO:0000315,GO:0003674,GO:0003735,GO:0005198,GO:0005575,GO:0005622,GO:0005623,GO:0005737,GO:0005739,GO:0005740,GO:0005743,GO:0005759,GO:0005761,GO:0005762,GO:0005840,GO:0006412,GO:0006414,GO:0006415,GO:0006518,GO:0006807,GO:0008150,GO:0008152,GO:0009058,GO:0009059,GO:0009987,GO:0010467,GO:0015934,GO:0016020,GO:0016043,GO:0019538,GO:0019866,GO:0022411,GO:0031090,GO:0031966,GO:0031967,GO:…	-	ko:K02911	ko03010,map03010	M00178	-	-	br01610,ko00000,ko00001,ko00002,ko03011,ko03029	-	-	-	Ribosomal_L32p
LOC119646552	201.114	222.318	170.396	138.667	481.08	191.254	247.372	323.998	127.558	193.448	28.4565	200.183	132.918	97.0904	282.035	136.707	446.225	305.151	199.837	229.751	294.962	642.622	195.234	373.108	333.297	205.226	139.629	134.553	XP_037902958.1	7165.AGAP008212-PA	9.33e-172	500	COG2124@1|root,KOG0158@2759|Eukaryota,38BTY@33154|Opisthokonta,3BF8S@33208|Metazoa,3CV2F@33213|Bilateria,41VYX@6656|Arthropoda,3SGMH@50557|Insecta,44XUS@7147|Diptera,45FWK@7148|Nematocera	33208|Metazoa	Q	cytochrome P450	Cyp6a9	GO:0002118,GO:0003674,GO:0003824,GO:0004497,GO:0005575,GO:0005622,GO:0005623,GO:0005737,GO:0005783,GO:0005789,GO:0006082,GO:0006091,GO:0006629,GO:0006631,GO:0006805,GO:0006950,GO:0006952,GO:0007610,GO:0008150,GO:0008152,GO:0009055,GO:0009266,GO:0009404,GO:0009410,GO:0009605,GO:0009607,GO:0009617,GO:0009628,GO:0009636,GO:0009987,GO:0010033,GO:0010243,GO:0012505,GO:0014070,GO:0014074,GO:0016020,GO:…	-	ko:K14999,ko:K15003	-	-	-	-	ko00000,ko00199,ko01000	-	-	-	p450
LOC119646553	427.324	372.338	291.617	248.445	237.039	259.463	191.903	181.843	238.552	177.248	172.435	299.401	168.422	227.25	168.099	262.662	152.618	155.77	162.735	131.09	183.028	160.968	232.672	146.903	264.314	196.914	198.824	232.846	XP_037902959.1	7217.FBpp0118298	5.43e-148	434	KOG2752@1|root,KOG2752@2759|Eukaryota,38GJS@33154|Opisthokonta,3BA1D@33208|Metazoa,3CXRE@33213|Bilateria,41W9W@6656|Arthropoda,3SIVY@50557|Insecta,44XWS@7147|Diptera,45PQF@7214|Drosophilidae	33208|Metazoa	S	Zinc ion binding	UBR7	-	2.3.2.27	ko:K11979	-	-	-	-	ko00000,ko01000,ko04121	-	-	-	zf-UBR
LOC119646554	296.754	502.239	419.92	277.318	262.292	262.092	562.17	635.479	322.14	357.293	372.226	177.292	510.775	326.647	525.879	370.955	520.345	504.158	470.675	499.553	640.446	556.546	277.368	517.974	648.908	511.698	581.017	685.907	XP_037902960.1	7213.XP_004536180.1	0	1749	KOG2955@1|root,KOG2955@2759|Eukaryota,39PEE@33154|Opisthokonta,3BGNS@33208|Metazoa,3CYTX@33213|Bilateria,41TS0@6656|Arthropoda,3SICD@50557|Insecta,44WX6@7147|Diptera	33208|Metazoa	S	identical protein binding	UHRF1BP1L	GO:0003674,GO:0005488,GO:0005515,GO:0005575,GO:0005622,GO:0005623,GO:0005737,GO:0005768,GO:0005769,GO:0005829,GO:0012505,GO:0019899,GO:0031410,GO:0031982,GO:0042802,GO:0042803,GO:0042826,GO:0043226,GO:0043227,GO:0043229,GO:0044424,GO:0044444,GO:0044464,GO:0046983,GO:0097708	-	-	-	-	-	-	-	-	-	-	Chorein_N
LOC119646556	2349	1037.83	766.118	1327.48	725.313	979.035	683.666	470.929	1015.61	1559.28	921.248	1638.66	412.079	1087.96	606.688	926.996	773.268	607.861	700.897	886.287	643.644	828.029	1198.13	868.093	858.759	553.078	803.827	821.658	XP_037902961.1	7213.XP_004521810.1	5.57e-106	314	KOG3211@1|root,KOG3211@2759|Eukaryota,38E44@33154|Opisthokonta,3BJGB@33208|Metazoa,3CUU0@33213|Bilateria,41XKW@6656|Arthropoda,3SFTG@50557|Insecta,44WVF@7147|Diptera	33208|Metazoa	S	Mannose-P-dolichol utilization defect 1	MPDU1	GO:0005575,GO:0005622,GO:0005623,GO:0005737,GO:0005783,GO:0005789,GO:0005975,GO:0006457,GO:0006464,GO:0006486,GO:0006487,GO:0006488,GO:0006490,GO:0006629,GO:0006807,GO:0008150,GO:0008152,GO:0009058,GO:0009059,GO:0009100,GO:0009101,GO:0009311,GO:0009312,GO:0009987,GO:0012505,GO:0016020,GO:0016021,GO:0016051,GO:0019538,GO:0031224,GO:0031984,GO:0034645,GO:0036211,GO:0042175,GO:0043170,GO:0043226,GO:…	-	ko:K09660	-	-	-	-	ko00000,ko01003	-	-	-	PQ-loop
LOC119646557	361.691	120.177	204.065	473.779	524.26	383.714	220.954	234.098	163.176	490.217	226.005	384.568	153.561	234.719	147.956	165.124	495.644	300.048	169.915	198.843	348.939	377.476	303.839	319.941	373.198	238.515	265.604	446.356	XP_037902962.1	7159.AAEL009127-PA	7.63e-165	482	COG2124@1|root,KOG0158@2759|Eukaryota,38BTY@33154|Opisthokonta,3BF8S@33208|Metazoa,3CV2F@33213|Bilateria,41VYX@6656|Arthropoda,3SGMH@50557|Insecta,44XUS@7147|Diptera,45FWK@7148|Nematocera	33208|Metazoa	Q	cytochrome P450	Cyp6a9	GO:0002118,GO:0003674,GO:0003824,GO:0004497,GO:0005575,GO:0005622,GO:0005623,GO:0005737,GO:0005783,GO:0005789,GO:0006082,GO:0006091,GO:0006629,GO:0006631,GO:0006805,GO:0006950,GO:0006952,GO:0007610,GO:0008150,GO:0008152,GO:0009055,GO:0009266,GO:0009404,GO:0009410,GO:0009605,GO:0009607,GO:0009617,GO:0009628,GO:0009636,GO:0009987,GO:0010033,GO:0010243,GO:0012505,GO:0014070,GO:0014074,GO:0016020,GO:…	-	ko:K14999,ko:K15003	-	-	-	-	ko00000,ko00199,ko01000	-	-	-	p450
LOC119646558	791.471	333.966	272.719	829.121	570.567	637.002	279.004	200.591	304.001	372.773	599.655	508.401	295.592	1091.34	319.446	282.631	297.969	398.387	345.758	310.925	321.241	317.636	656.435	363.232	213.627	466.012	321.029	261.027	XP_037902963.1	7159.AAEL012011-PA	6.32e-95	280	KOG0420@1|root,KOG0420@2759|Eukaryota,38TD7@33154|Opisthokonta,3BD5A@33208|Metazoa,3CVD6@33213|Bilateria,41YNJ@6656|Arthropoda,3SMDA@50557|Insecta,455ST@7147|Diptera,45C5Y@7148|Nematocera	33208|Metazoa	O	Belongs to the ubiquitin-conjugating enzyme family	UBE2F	GO:0003674,GO:0003824,GO:0004842,GO:0005488,GO:0005515,GO:0005575,GO:0005622,GO:0005623,GO:0005737,GO:0005829,GO:0006464,GO:0006807,GO:0008150,GO:0008152,GO:0009966,GO:0009968,GO:0009987,GO:0010646,GO:0010648,GO:0016567,GO:0016740,GO:0019538,GO:0019787,GO:0019788,GO:0019899,GO:0023051,GO:0023057,GO:0031625,GO:0032446,GO:0036211,GO:0043170,GO:0043412,GO:0043516,GO:0043518,GO:0043687,GO:0044237,GO:…	2.3.2.23	ko:K10687	ko04120,map04120	-	-	-	ko00000,ko00001,ko01000,ko04121	-	-	-	UQ_con
LOC119646559	477.994	511.745	661.472	150.951	1351.26	914.735	737.018	854.212	393.827	835.558	427.266	920.531	607.379	630.354	959.975	853.043	1007.08	1128.81	1020.72	1652.29	985.061	1144.1	1441.61	1833.48	542.547	1299.62	678.173	919.828	XP_037902967.1	7159.AAEL008494-PA	3.89e-113	339	KOG0762@1|root,KOG0762@2759|Eukaryota,3ANYM@33154|Opisthokonta,3BFAF@33208|Metazoa,3CRM5@33213|Bilateria,41TNW@6656|Arthropoda,3SGEM@50557|Insecta,44YN9@7147|Diptera,45FUP@7148|Nematocera	33208|Metazoa	C	Belongs to the mitochondrial carrier (TC 2.A.29) family	SLC25A29	GO:0003333,GO:0003674,GO:0005215,GO:0005287,GO:0005289,GO:0005292,GO:0005342,GO:0005575,GO:0005622,GO:0005623,GO:0005737,GO:0005739,GO:0005740,GO:0005743,GO:0006810,GO:0006811,GO:0006812,GO:0006820,GO:0006839,GO:0006844,GO:0006855,GO:0006865,GO:0008150,GO:0008324,GO:0008509,GO:0008514,GO:0008519,GO:0015075,GO:0015101,GO:0015171,GO:0015174,GO:0015179,GO:0015181,GO:0015189,GO:0015227,GO:0015238,GO:…	-	ko:K15109	ko04714,map04714	-	-	-	ko00000,ko00001,ko02000	2.A.29.8	-	-	Mito_carr
LOC119646562	178.885	321.913	153.594	101.109	71.028	110.877	216.619	32.4156	511.858	191.387	301.893	349.406	176.648	219.82	616.411	498.445	78.4887	127.666	247.763	100.079	146.196	134.717	179.558	97.3199	141.283	300.368	231.42	191.779	XP_037902969.1	7213.XP_004523458.1	3.45e-274	761	COG0531@1|root,KOG1287@2759|Eukaryota,38BBK@33154|Opisthokonta,3B9U2@33208|Metazoa,3CR7T@33213|Bilateria,41UVY@6656|Arthropoda,3SJVI@50557|Insecta,44Z4B@7147|Diptera	33208|Metazoa	E	amino acid transmembrane transporter activity. It is involved in the biological process described with amino acid transmembrane transport	SLC7A6	GO:0000003,GO:0000820,GO:0000821,GO:0002376,GO:0003333,GO:0003674,GO:0005215,GO:0005342,GO:0005575,GO:0005622,GO:0005623,GO:0005886,GO:0005887,GO:0006082,GO:0006520,GO:0006521,GO:0006807,GO:0006810,GO:0006811,GO:0006820,GO:0006835,GO:0006865,GO:0006897,GO:0006909,GO:0006928,GO:0006950,GO:0006952,GO:0007610,GO:0007617,GO:0007618,GO:0007619,GO:0007635,GO:0008049,GO:0008150,GO:0008152,GO:0008509,GO:…	-	ko:K13867,ko:K13872	ko04974,map04974	-	-	-	ko00000,ko00001,ko02000	2.A.3.8,2.A.3.8.7	-	-	AA_permease_2
LOC119646563	330.402	118.911	125.883	460.694	295.299	387.884	97.2047	113.566	215.074	203.643	182.017	362.413	180.259	434.546	149.235	210.611	56.6057	75.0531	63.3661	42.643	55.0395	78.2085	155.406	82.1307	91.9216	87.5467	110.399	56.3769	XP_037902971.1	7370.XP_005179764.1	1.32e-58	191	COG1412@1|root,KOG3164@2759|Eukaryota,38GU1@33154|Opisthokonta,3BBJX@33208|Metazoa,3CSXP@33213|Bilateria,41YSR@6656|Arthropoda,3SMF0@50557|Insecta,453NH@7147|Diptera	33208|Metazoa	S	Fcf1	UTP23	GO:0000462,GO:0000469,GO:0000478,GO:0000479,GO:0000480,GO:0003674,GO:0003676,GO:0003723,GO:0003729,GO:0003730,GO:0005488,GO:0005575,GO:0005622,GO:0005623,GO:0005634,GO:0005730,GO:0006139,GO:0006364,GO:0006396,GO:0006725,GO:0006807,GO:0008150,GO:0008152,GO:0009987,GO:0010467,GO:0016070,GO:0016072,GO:0019843,GO:0022613,GO:0030490,GO:0030684,GO:0031974,GO:0031981,GO:0032040,GO:0032991,GO:0034470,GO:…	-	ko:K14773	-	-	-	-	ko00000,ko03009	-	-	-	Fcf1
LOC119646565	2754.07	633.799	350.576	1493.65	1051.25	955.61	468.763	377.63	631.388	825.11	735.608	1192.05	454.371	1449.21	523.054	601.425	463.583	496.862	459.13	417.855	459.015	587.266	945.884	574.422	772.372	781.956	475.293	644.821	XP_037902972.1	7217.FBpp0118517	9.65e-90	264	KOG2729@1|root,KOG2729@2759|Eukaryota,38Z1C@33154|Opisthokonta,3BHXU@33208|Metazoa,3D0V7@33213|Bilateria,41Z18@6656|Arthropoda,3SM3F@50557|Insecta,451EG@7147|Diptera,45TP0@7214|Drosophilidae	33208|Metazoa	U	It is involved in the biological process described with intracellular signal transduction	CNIH1	GO:0000003,GO:0000139,GO:0000578,GO:0002064,GO:0002065,GO:0002066,GO:0002376,GO:0003002,GO:0003006,GO:0003674,GO:0005102,GO:0005488,GO:0005515,GO:0005575,GO:0005622,GO:0005623,GO:0005737,GO:0005783,GO:0005789,GO:0005793,GO:0005794,GO:0005798,GO:0006810,GO:0006888,GO:0006900,GO:0006901,GO:0006903,GO:0006955,GO:0006996,GO:0007154,GO:0007165,GO:0007166,GO:0007167,GO:0007169,GO:0007173,GO:0007275,GO:…	-	ko:K20368	-	-	-	-	ko00000,ko02000,ko04131	8.A.61	-	-	Cornichon
LOC119646568	312.907	312.014	511.225	453.553	6392.91	627.401	435.798	644.958	260.081	757.544	267.757	364.356	722.35	279.548	1120.63	556.814	66.8609	57.4534	41.8852	89.8195	127.738	38.5209	18.2409	17.1226	1.66228	30.5042	12.9	9.66882	XP_037902979.1	7370.XP_005183433.1	5.2e-143	427	COG2124@1|root,KOG0158@2759|Eukaryota,39RVP@33154|Opisthokonta,3BMY8@33208|Metazoa,3D605@33213|Bilateria,41WDN@6656|Arthropoda,3SINQ@50557|Insecta,451H4@7147|Diptera	33208|Metazoa	Q	heme binding. It is involved in the biological process described with oxidation-reduction process	-	GO:0003674,GO:0003824,GO:0008150,GO:0008152,GO:0016491,GO:0055114	-	ko:K14999	-	-	-	-	ko00000,ko00199,ko01000	-	-	-	p450
LOC119646569	262.891	605.107	683.027	403.257	526.902	474.06	692.979	834.635	786.236	757.388	564.098	552.484	860.028	548.758	703.563	844.066	1033.99	1199.51	923.222	1075.69	1110.05	894.399	548.246	840.317	746.214	752.973	1043.69	892.817	XP_037902986.1	7165.AGAP010235-PA	0	962	COG5142@1|root,KOG2801@2759|Eukaryota,39S21@33154|Opisthokonta,3BGVM@33208|Metazoa,3CUE1@33213|Bilateria,41V8Q@6656|Arthropoda,3SJP1@50557|Insecta,452CM@7147|Diptera,45HQ9@7148|Nematocera	33208|Metazoa	U	domain in TBC and LysM domain containing proteins	TBC1D24	GO:0003674,GO:0005096,GO:0005575,GO:0005622,GO:0005623,GO:0005737,GO:0005886,GO:0007154,GO:0007267,GO:0007268,GO:0007274,GO:0007275,GO:0007399,GO:0008047,GO:0008150,GO:0009892,GO:0009966,GO:0009967,GO:0009987,GO:0010605,GO:0010646,GO:0010647,GO:0010720,GO:0010769,GO:0010770,GO:0010941,GO:0010975,GO:0010976,GO:0016020,GO:0016043,GO:0019222,GO:0022008,GO:0022603,GO:0022604,GO:0023051,GO:0023052,GO:…	-	ko:K21841	-	-	-	-	ko00000,ko04131	-	-	-	RabGAP-TBC,TLD
LOC119646570	1885.18	2118.82	2260.65	3222.45	9570.28	5291.53	4493.02	7588.1	1724.3	2834.8	2053.78	3276.87	6002.64	1861.29	5182.9	2754.89	2481.1	3104.51	3643.18	2085.44	4060.18	2778.16	3484.79	3211.12	1718.48	3442.7	2407.95	1973.61	XP_037902989.1	7213.XP_004521668.1	7.83e-20	95.5	2E8P6@1|root,2SF4P@2759|Eukaryota,3ADEE@33154|Opisthokonta,3BW1Q@33208|Metazoa,3DCGY@33213|Bilateria,421J3@6656|Arthropoda,3SQ01@50557|Insecta,453S2@7147|Diptera	33208|Metazoa	-	-	-	GO:0002252,GO:0002376,GO:0006950,GO:0006952,GO:0008150,GO:0009605,GO:0009607,GO:0009615,GO:0043207,GO:0050896,GO:0051607,GO:0051704,GO:0051707,GO:0098542	-	-	-	-	-	-	-	-	-	-	-
LOC119646571	1331.49	457.715	582.111	515.893	1467.45	1083.65	984.293	1270.18	775.094	1924.89	1344.28	1218.1	1361.26	2291.14	851.228	1251.64	1716.8	0	1.19589	331.066	510.397	1546.58	0	4850.4	2913.02	9.26	16.7126	653.053	XP_037902988.1	136037.KDR20688	1.99e-68	219	COG5640@1|root,KOG3627@2759|Eukaryota,3A0SR@33154|Opisthokonta,3BQSN@33208|Metazoa,3D7GV@33213|Bilateria,41Z8W@6656|Arthropoda,3SM0S@50557|Insecta	33208|Metazoa	O	serine-type endopeptidase activity. It is involved in the biological process described with proteolysis	-	GO:0003674,GO:0003824,GO:0004175,GO:0004252,GO:0005575,GO:0005622,GO:0005623,GO:0005737,GO:0006508,GO:0006807,GO:0008150,GO:0008152,GO:0008233,GO:0008236,GO:0016787,GO:0017171,GO:0019538,GO:0043170,GO:0044238,GO:0044424,GO:0044464,GO:0070011,GO:0071704,GO:0140096,GO:1901564	-	ko:K09640	-	-	-	-	ko00000,ko01000,ko01002	-	-	-	Trypsin
LOC119646572	0	3.44318	2.68413	12.9911	0	9.71826	0	2.07548	0.828427	15.2095	40.498	22.8346	9.0855	3.19368	0	3.06892	14.5181	2.55419	0	10.3714	13.12	13.7462	0	89.2858	35.7429	0	0	9.64304	XP_037902990.1	7370.XP_005182806.1	4.24e-22	94	2E2XC@1|root,2SA3C@2759|Eukaryota,3A937@33154|Opisthokonta,3BU45@33208|Metazoa,3DBVJ@33213|Bilateria,421V7@6656|Arthropoda,3SPMI@50557|Insecta,454CC@7147|Diptera	33208|Metazoa	-	-	-	-	-	-	-	-	-	-	-	-	-	-	-
LOC119646574	396.119	306.393	185.785	52.8453	125.672	83.8932	171.65	215.259	283.315	108.409	20.5524	177.25	153.242	42.8223	184.802	171.373	146.082	137.154	380.107	111.235	87.0193	92.9496	314.054	194.45	60.8522	73.5159	154.809	125.273	XP_037902992.1	7213.XP_004537624.1	1.14e-21	105	2ETVU@1|root,2SW4T@2759|Eukaryota,3ASBF@33154|Opisthokonta,3C41Y@33208|Metazoa,3DJ9C@33213|Bilateria,423XT@6656|Arthropoda,3SSAZ@50557|Insecta,456UX@7147|Diptera	33208|Metazoa	-	-	-	-	-	-	-	-	-	-	-	-	-	-	-
LOC119646575	396.522	272.243	258.598	258.557	344.197	292.335	205.091	180.771	253.467	218.788	246.995	251.119	194.85	251.778	187.526	187.396	164.246	199.187	214.172	234.244	193.549	157.622	249.166	148.711	275.128	229.288	186.689	246.535	XP_037902996.1	7213.XP_004520662.1	7.26e-134	400	2CY2K@1|root,2S1HG@2759|Eukaryota,3A4W4@33154|Opisthokonta,3BRQC@33208|Metazoa,3D8XG@33213|Bilateria,41ZXW@6656|Arthropoda,3SPPP@50557|Insecta,4589Z@7147|Diptera	33208|Metazoa	S	YqaJ-like viral recombinase domain	-	-	-	-	-	-	-	-	-	-	-	-	Herpes_alk_exo,YqaJ
LOC119646576	299.265	250.488	74.7924	137.218	123.131	106.024	275.689	138.094	131.684	91.1197	372.675	80.7591	160.116	388.476	436.589	82.9463	75.5814	256.583	237.048	152.959	139.641	161.704	163.915	155.872	84.7614	248.551	138.075	172.458	XP_037902997.1	7159.AAEL013489-PA	3.49e-290	801	KOG0253@1|root,KOG0253@2759|Eukaryota,38BRT@33154|Opisthokonta,3BCKS@33208|Metazoa,3CUK1@33213|Bilateria,41VI2@6656|Arthropoda,3SFY3@50557|Insecta,44ZW4@7147|Diptera,45HKM@7148|Nematocera	33208|Metazoa	S	Sugar (and other) transporter	SVOP	GO:0005575,GO:0005622,GO:0005623,GO:0005737,GO:0008021,GO:0012505,GO:0016020,GO:0016021,GO:0030133,GO:0031224,GO:0031410,GO:0031982,GO:0043226,GO:0043227,GO:0043229,GO:0044424,GO:0044425,GO:0044444,GO:0044456,GO:0044464,GO:0045202,GO:0070382,GO:0097458,GO:0097708,GO:0098793,GO:0099503	-	-	-	-	-	-	-	-	-	-	MFS_1,Sugar_tr
LOC119646578	1060.97	667.337	663.319	1001.06	1029.72	781.411	973.405	1196.87	644.694	740.054	872.231	435.749	686.567	236.708	897.41	642.885	370.553	583.787	855.956	379.667	389.241	338.323	828.402	583.514	393.295	412.827	745.695	580.372	NA	NA	NA	NA	NA	NA	NA	NA	NA	NA	NA	NA	NA	NA	NA	NA	NA	NA	NA	NA	NA
LOC119646579	187.278	276.734	314.602	190.663	289.33	190.077	283.547	358.675	189.668	320.999	162.227	158.022	239.381	112.045	190.418	248.839	327.036	322.992	313.599	222.224	279.225	313.56	205.067	261.32	335.753	326.241	246.593	319.902	XP_037902999.1	7159.AAEL007768-PA	4.3e-78	258	28PXY@1|root,2QWKI@2759|Eukaryota,39UIK@33154|Opisthokonta,3BIBY@33208|Metazoa,3CXMR@33213|Bilateria,41Z1V@6656|Arthropoda,3SKXH@50557|Insecta,453TI@7147|Diptera,45BSY@7148|Nematocera	33208|Metazoa	T	TIR domain	MYD88	GO:0000165,GO:0001775,GO:0001816,GO:0001817,GO:0001819,GO:0001885,GO:0001932,GO:0001934,GO:0002064,GO:0002218,GO:0002221,GO:0002224,GO:0002225,GO:0002237,GO:0002238,GO:0002250,GO:0002252,GO:0002253,GO:0002263,GO:0002274,GO:0002275,GO:0002283,GO:0002366,GO:0002376,GO:0002440,GO:0002443,GO:0002449,GO:0002460,GO:0002682,GO:0002684,GO:0002685,GO:0002694,GO:0002696,GO:0002697,GO:0002699,GO:0002700,GO:…	-	ko:K04729	ko04010,ko04064,ko04620,ko04621,ko04624,ko05132,ko05133,ko05134,ko05140,ko05142,ko05143,ko05144,ko05145,ko05152,ko05161,ko05162,ko05164,ko05168,map04010,map04064,map04620,map04621,map04624,map05132,map05133,map05134,map05140,map05142,map05143,map05144,map05145,map05152,map05161,map05162,map05164,map05168	M00686	-	-	ko00000,ko00001,ko00002	-	-	-	Death,TIR,TIR_2
LOC119646580	3227.82	4369.6	8124.67	4925.54	5398.06	3441.42	3826.89	6056.99	1456.14	3396.92	1004.26	3570.77	2517.15	698.849	2556.48	2195	2595.95	1939.41	421.225	986.681	1898.86	1689.65	711.53	1191.41	718.949	1031.65	901.506	811.358	XP_037903000.1	7176.CPIJ016856-PA	8.31e-169	493	COG2124@1|root,KOG0158@2759|Eukaryota,38BTY@33154|Opisthokonta,3BF8S@33208|Metazoa,3CV2F@33213|Bilateria,41VYX@6656|Arthropoda,3SK5P@50557|Insecta,455FX@7147|Diptera,45FEX@7148|Nematocera	33208|Metazoa	Q	cytochrome P450	Cyp6a9	GO:0002118,GO:0003674,GO:0003824,GO:0004497,GO:0005575,GO:0005622,GO:0005623,GO:0005737,GO:0005783,GO:0005789,GO:0006082,GO:0006091,GO:0006629,GO:0006631,GO:0006805,GO:0006950,GO:0006952,GO:0007610,GO:0008150,GO:0008152,GO:0009055,GO:0009266,GO:0009404,GO:0009410,GO:0009605,GO:0009607,GO:0009617,GO:0009628,GO:0009636,GO:0009987,GO:0010033,GO:0010243,GO:0012505,GO:0014070,GO:0014074,GO:0016020,GO:…	-	ko:K14999,ko:K15003	-	-	-	-	ko00000,ko00199,ko01000	-	-	-	p450
LOC119646581	1164.17	754.023	666.646	860.899	774.581	565.14	464.711	389.689	566.585	662.484	568.672	727.918	349.262	843.838	463.195	489.227	481.11	407.326	419.933	430.288	422.615	449.233	969.597	485.812	576.045	527.963	428.039	497.08	XP_037903002.1	7165.AGAP009834-PA	2.4e-252	697	KOG1497@1|root,KOG1497@2759|Eukaryota,38DU8@33154|Opisthokonta,3BCHH@33208|Metazoa,3CV5W@33213|Bilateria,41WKS@6656|Arthropoda,3SI27@50557|Insecta,44Y2W@7147|Diptera,45CTH@7148|Nematocera	33208|Metazoa	OT	motif in proteasome subunits, Int-6, Nip-1 and TRIP-15	COPS4	GO:0000003,GO:0000338,GO:0000715,GO:0001067,GO:0001654,GO:0001745,GO:0001751,GO:0001754,GO:0002009,GO:0003006,GO:0003674,GO:0003676,GO:0003677,GO:0003824,GO:0005488,GO:0005515,GO:0005575,GO:0005622,GO:0005623,GO:0005634,GO:0005654,GO:0005737,GO:0005829,GO:0006139,GO:0006259,GO:0006281,GO:0006283,GO:0006289,GO:0006464,GO:0006508,GO:0006725,GO:0006807,GO:0006950,GO:0006974,GO:0006996,GO:0007275,GO:…	-	ko:K12178	-	-	-	-	ko00000,ko04121	-	-	-	PCI
LOC119646583	33.8319	26.4124	32.3051	165.906	232.211	96.1627	27.2732	78.3752	14.8895	25.2797	71.7996	64.8791	88.2028	31.1959	43.7485	17.6433	24.905	57.3739	81.3163	29.3761	25.0009	13.5504	83.7161	18.0836	43.9889	44.2958	80.3434	58.7594	XP_037903005.1	7370.XP_005180219.1	3.46e-173	492	COG1100@1|root,KOG0395@2759|Eukaryota,39TE6@33154|Opisthokonta,3BHVI@33208|Metazoa,3CV32@33213|Bilateria,41YCF@6656|Arthropoda,3SKR8@50557|Insecta,44YVY@7147|Diptera	33208|Metazoa	S	GTP binding. It is involved in the biological process described with	-	-	-	-	-	-	-	-	-	-	-	-	Ras
LOC119646584	363.313	144.84	178.378	584.73	586.184	476.157	240.431	260.89	354.335	511.886	316.484	500.575	313.099	460.236	206.407	263.33	232.711	285.92	256.239	216.144	248.084	212.6	426.202	291.491	235.399	326.102	246.319	227.921	XP_037903006.1	7165.AGAP008033-PA	2.77e-118	353	COG0457@1|root,KOG1840@2759|Eukaryota,39WUJ@33154|Opisthokonta,3BGH9@33208|Metazoa,3D1GY@33213|Bilateria,41U1X@6656|Arthropoda,3SMUT@50557|Insecta,44YQD@7147|Diptera,45F5R@7148|Nematocera	33208|Metazoa	Z	Tetratricopeptide repeat	TTC19	GO:0000278,GO:0000281,GO:0000910,GO:0005575,GO:0005622,GO:0005623,GO:0005737,GO:0005739,GO:0005740,GO:0005743,GO:0005813,GO:0005815,GO:0005856,GO:0006996,GO:0007005,GO:0007049,GO:0007610,GO:0007626,GO:0007630,GO:0007632,GO:0007634,GO:0008150,GO:0008344,GO:0009314,GO:0009416,GO:0009628,GO:0009987,GO:0015630,GO:0016020,GO:0016043,GO:0017004,GO:0017062,GO:0019866,GO:0022402,GO:0022607,GO:0030496,GO:…	-	ko:K18169	-	-	-	-	ko00000,ko03029	-	-	-	TPR_10,TPR_12,TPR_8
LOC119646585	884.521	658.493	760.106	657.238	1983.11	1296.93	1644.61	1077.75	652.764	1624.04	1618.32	1097.68	763.017	2014.94	1278.76	709.647	1236.94	1485.13	867.21	1099.91	838.498	1038.97	1704.92	2364.41	522.058	860.08	820.497	1346.91	XP_037903008.1	7213.XP_004522611.1	1.77e-95	286	KOG4064@1|root,KOG4064@2759|Eukaryota,38G67@33154|Opisthokonta,3BI7G@33208|Metazoa,3D0I1@33213|Bilateria,41YTW@6656|Arthropoda,3SM4P@50557|Insecta,44Z26@7147|Diptera	33208|Metazoa	E	cysteine dioxygenase activity. It is involved in the biological process described with	CDO1	GO:0000096,GO:0000097,GO:0000098,GO:0001101,GO:0003674,GO:0003824,GO:0005488,GO:0005506,GO:0005575,GO:0005622,GO:0005623,GO:0005737,GO:0005829,GO:0005886,GO:0006082,GO:0006520,GO:0006534,GO:0006790,GO:0006805,GO:0006807,GO:0006810,GO:0006950,GO:0006952,GO:0006954,GO:0007275,GO:0007589,GO:0007595,GO:0008150,GO:0008152,GO:0008198,GO:0008652,GO:0009056,GO:0009058,GO:0009063,GO:0009069,GO:0009071,GO:…	1.13.11.20	ko:K00456	ko00270,ko00430,ko01100,map00270,map00430,map01100	-	R00893	RC00404	ko00000,ko00001,ko01000	-	-	-	CDO_I
LOC119646587	547.476	320.971	316.546	444.889	297.645	196.126	197.193	189.173	354.512	312.961	358.218	300.274	244.372	270.999	171.582	268.807	143.897	197.901	179.494	200.297	147.481	146.205	260.92	198.27	171.22	224.639	246.628	199.01	XP_037903009.1	7245.FBpp0262362	3.33e-231	651	COG0144@1|root,KOG2198@2759|Eukaryota,38EFR@33154|Opisthokonta,3BKJ4@33208|Metazoa,3D1U9@33213|Bilateria,41WUA@6656|Arthropoda,3SH6F@50557|Insecta,450UM@7147|Diptera,45XGV@7214|Drosophilidae	33208|Metazoa	A	Belongs to the class I-like SAM-binding methyltransferase superfamily. RsmB NOP family	NSUN4	GO:0000154,GO:0000313,GO:0000315,GO:0001510,GO:0003674,GO:0003824,GO:0005575,GO:0005622,GO:0005623,GO:0005737,GO:0005739,GO:0005759,GO:0005761,GO:0005762,GO:0005840,GO:0006139,GO:0006364,GO:0006396,GO:0006725,GO:0006807,GO:0008150,GO:0008152,GO:0008168,GO:0008169,GO:0008173,GO:0008649,GO:0008757,GO:0009383,GO:0009451,GO:0009987,GO:0010467,GO:0015934,GO:0016070,GO:0016072,GO:0016434,GO:0016740,GO:…	-	ko:K21970	-	-	-	-	ko00000,ko01000,ko03009,ko03029	-	-	-	Methyltr_RsmB-F
LOC119646588	33.5562	11.0339	20.6698	60.2742	43.9926	23.9884	12.9547	19.6675	9.10143	29.395	18.0096	23.9183	7.42136	35.9655	3.49671	7.71954	7.36345	6.36347	10.6666	4.53406	9.19966	5.86607	16.7628	2.74791	14.7987	1.88396	2.22772	2.35227	NA	NA	NA	NA	NA	NA	NA	NA	NA	NA	NA	NA	NA	NA	NA	NA	NA	NA	NA	NA	NA
LOC119646589	381.316	375.9	637.83	190.666	3113.69	750.42	790.566	1343.12	831.605	528.676	76.1534	1301.17	364.073	88.557	599.533	576.014	255.816	343.449	482.26	985.177	362.13	124.649	335.682	563.256	104.725	226.48	214.751	111.995	XP_037903010.1	7227.FBpp0085807	1.63e-199	568	COG0596@1|root,KOG2565@2759|Eukaryota,38FY7@33154|Opisthokonta,3BB6M@33208|Metazoa,3CZY0@33213|Bilateria,41UUK@6656|Arthropoda,3SIFQ@50557|Insecta,44Z2E@7147|Diptera,45Q2T@7214|Drosophilidae	33208|Metazoa	S	Catalyzes juvenile hormone hydrolysis	EPHX1	GO:0001889,GO:0003674,GO:0003824,GO:0004301,GO:0005488,GO:0005515,GO:0005575,GO:0005622,GO:0005623,GO:0005737,GO:0005783,GO:0005789,GO:0005886,GO:0006066,GO:0006629,GO:0006714,GO:0006716,GO:0006719,GO:0006720,GO:0006721,GO:0006725,GO:0006805,GO:0007275,GO:0008096,GO:0008150,GO:0008152,GO:0008300,GO:0009056,GO:0009058,GO:0009410,GO:0009719,GO:0009725,GO:0009987,GO:0010033,GO:0010817,GO:0012505,GO:…	1.11.1.12,3.3.2.9	ko:K01253,ko:K05361,ko:K10719	ko00480,ko00980,ko00981,ko04216,ko04976,ko05204,map00480,map00980,map00981,map04216,map04976,map05204	-	R03167,R07013,R07014,R07027,R07071,R07072,R07082,R08152,R08153,R09410,R09417,R09443	RC00011,RC01447,RC01728,RC01764,RC02031,RC02528	ko00000,ko00001,ko01000,ko01002	-	-	-	Abhydrolase_1,EHN
LOC119646590	759.598	826.534	726.655	543.114	1001.6	822.213	643.461	826.583	557.457	660.399	637.098	542.62	752.14	514.233	643.177	749.586	1042.16	833.766	896.202	539.156	1185.03	1250.59	1087.81	843.584	906.831	1825	1038.16	1292.31	XP_037903011.1	7370.XP_005187815.1	2.95e-155	447	COG5057@1|root,KOG2867@2759|Eukaryota,38E5Z@33154|Opisthokonta,3BHQ3@33208|Metazoa,3CXXA@33213|Bilateria,41TTW@6656|Arthropoda,3SIU8@50557|Insecta,44XN6@7147|Diptera	33208|Metazoa	O	PPIases accelerate the folding of proteins. It catalyzes the cis-trans isomerization of proline imidic peptide bonds in oligopeptides	PPP2R4	GO:0000159,GO:0000166,GO:0000413,GO:0003674,GO:0003755,GO:0003824,GO:0005102,GO:0005488,GO:0005515,GO:0005524,GO:0005575,GO:0005622,GO:0005623,GO:0005634,GO:0005654,GO:0005737,GO:0006464,GO:0006807,GO:0008047,GO:0008104,GO:0008144,GO:0008150,GO:0008152,GO:0008160,GO:0008287,GO:0009892,GO:0009893,GO:0009987,GO:0010453,GO:0010562,GO:0010563,GO:0010604,GO:0010605,GO:0010921,GO:0010922,GO:0010923,GO:…	-	ko:K17605	ko04931,map04931	-	-	-	ko00000,ko00001,ko01009	-	-	-	PTPA
LOC119646591	244.668	367.28	364.499	340.88	142.152	313.175	384.87	327.392	281.594	273.378	452.191	196.638	229.457	234.781	485.88	300.296	252.907	285.954	326.81	267.745	324.046	276.03	258.708	349.603	311.635	350.221	364.172	341.679	XP_037903012.1	7213.XP_004537817.1	7.17e-167	503	KOG4274@1|root,KOG4274@2759|Eukaryota,39RNT@33154|Opisthokonta,3BFG5@33208|Metazoa,3CT47@33213|Bilateria,41YC6@6656|Arthropoda,3SGSA@50557|Insecta,44ZCK@7147|Diptera	33208|Metazoa	K	RNA polymerase II transcription cofactor activity. It is involved in the biological process described with regulation of transcription from RNA polymerase II promoter	MED15	GO:0000003,GO:0002064,GO:0002065,GO:0002066,GO:0003006,GO:0003674,GO:0003712,GO:0005575,GO:0005622,GO:0005623,GO:0005634,GO:0005654,GO:0005737,GO:0006139,GO:0006351,GO:0006352,GO:0006366,GO:0006367,GO:0006725,GO:0006807,GO:0007276,GO:0007281,GO:0007292,GO:0008150,GO:0008152,GO:0009058,GO:0009059,GO:0009888,GO:0009889,GO:0009987,GO:0010467,GO:0010556,GO:0016070,GO:0016592,GO:0018130,GO:0019219,GO:…	-	ko:K15157	-	-	-	-	ko00000,ko03021	-	-	-	Med15
LOC119646592	36.3707	62.645	61.3229	80.8857	91.963	98.7217	232.56	104.641	124.226	135.655	78.5151	108.844	177.436	70.443	149.497	184.325	97.3835	125.094	189.182	124.974	86.9552	97.1955	180.227	176.584	75.6168	151.515	81.9296	66.0852	XP_037903013.1	7370.XP_005185242.1	3.92e-97	300	KOG3898@1|root,KOG3898@2759|Eukaryota,39Y76@33154|Opisthokonta,3BHDN@33208|Metazoa,3CY2P@33213|Bilateria,41Z6X@6656|Arthropoda,3SMR1@50557|Insecta,4530W@7147|Diptera	33208|Metazoa	K	protein dimerization activity	ATOH8	GO:0000122,GO:0000976,GO:0000977,GO:0000978,GO:0000981,GO:0000987,GO:0001012,GO:0001067,GO:0001704,GO:0001936,GO:0001937,GO:0001947,GO:0002009,GO:0002165,GO:0003002,GO:0003007,GO:0003143,GO:0003674,GO:0003676,GO:0003677,GO:0003690,GO:0003700,GO:0005488,GO:0005515,GO:0005575,GO:0005622,GO:0005623,GO:0005634,GO:0005654,GO:0005737,GO:0006355,GO:0006357,GO:0007154,GO:0007165,GO:0007166,GO:0007167,GO:…	-	ko:K09084	-	-	-	-	ko00000,ko03000	-	-	-	HLH
LOC119646593	155.209	176.014	198.091	77.9978	26.0088	249.818	123.306	100.424	533.365	165.033	207.256	272.128	197.261	313.761	278.064	405.515	100.291	116.166	102.956	94.1397	67.1831	75.7783	97.4536	86.4975	86.4249	72.0738	141.872	114.432	XP_037903015.1	43151.ADAC006732-PA	1.55e-224	657	KOG0319@1|root,KOG0319@2759|Eukaryota,38BUJ@33154|Opisthokonta,3B9H7@33208|Metazoa,3CT9V@33213|Bilateria,41WW5@6656|Arthropoda,3SGNN@50557|Insecta,4508H@7147|Diptera,45E0I@7148|Nematocera	33208|Metazoa	A	Utp13 specific WD40 associated domain	TBL3	GO:0000462,GO:0003674,GO:0003676,GO:0003723,GO:0005488,GO:0005575,GO:0005622,GO:0005623,GO:0005634,GO:0005654,GO:0005730,GO:0006139,GO:0006364,GO:0006396,GO:0006725,GO:0006807,GO:0008150,GO:0008152,GO:0009987,GO:0010467,GO:0016070,GO:0016072,GO:0022613,GO:0030490,GO:0030515,GO:0030684,GO:0030686,GO:0031974,GO:0031981,GO:0032040,GO:0032991,GO:0034388,GO:0034470,GO:0034641,GO:0034660,GO:0042254,GO:…	-	ko:K14555	ko03008,map03008	-	-	-	ko00000,ko00001,ko03009	-	-	-	Utp13,WD40
LOC119646595	47.5581	148.247	214.962	196.437	331.372	190.126	182.343	275.191	401.667	464.679	115.278	367.791	240.986	149.422	181.475	376.33	767.44	495.277	226.294	644.032	570.465	1386.91	371.416	159.469	474.48	130.27	263.241	410.207	XP_037903017.1	7213.XP_004535853.1	5.46e-169	519	COG2234@1|root,KOG2194@2759|Eukaryota,38F29@33154|Opisthokonta,3BCDX@33208|Metazoa,3CTWE@33213|Bilateria,41V7T@6656|Arthropoda,3SI3R@50557|Insecta,451U3@7147|Diptera	33208|Metazoa	O	Peptidase family M28	-	-	-	-	-	-	-	-	-	-	-	-	Peptidase_M28
LOC119646596	276.608	218.915	427.715	15.8888	3081.71	650.562	1510.81	2173.32	87.7975	417.248	51.0366	489.9	353.326	76.8236	735.773	162.052	643.9	457.069	595.983	449.064	221.242	442.934	782.455	871.439	332.451	450.156	233.714	678.437	XP_037903021.1	7230.FBpp0166570	1.03e-80	264	28N19@1|root,2S0GJ@2759|Eukaryota,3A225@33154|Opisthokonta,3BQJB@33208|Metazoa,3D7UY@33213|Bilateria,41Z5R@6656|Arthropoda,3SM6U@50557|Insecta,44YCW@7147|Diptera,45P7T@7214|Drosophilidae	33208|Metazoa	G	Carboxylic ester hydrolase activity	-	-	-	ko:K19404	-	-	-	-	ko00000,ko01000	-	-	-	Lipase
LOC119646598	25.1787	19.488	21.5664	28.8933	27.757	19.5029	18.5008	6.27857	29.8205	3.03782	15.0419	10.5356	30.5427	0	11.8213	8.44982	0	0	10.7773	0	0	0	3.64281	0	6.64912	3.69651	12.8993	0	XP_037903019.1	7159.AAEL000715-PA	8.5e-124	375	KOG1721@1|root,KOG1721@2759|Eukaryota,39276@33154|Opisthokonta,3BHK3@33208|Metazoa,3D3M2@33213|Bilateria,41VV2@6656|Arthropoda,3SJ4F@50557|Insecta,451FT@7147|Diptera,45H20@7148|Nematocera	33208|Metazoa	S	Zinc finger protein	-	-	-	-	-	-	-	-	-	-	-	-	zf-C2H2,zf-C2H2_6,zf-H2C2_2
LOC119646599	27.9589	78.5929	94.995	125.664	55.4632	96.2643	51.0788	128.645	98.5589	61.7652	61.0254	113.245	114.731	62.9622	100.784	110.595	143.896	117.447	208.288	85.3357	113.28	125.596	198.618	36.9434	85.5972	49.9018	156.294	131.35	XP_037903020.1	7213.XP_004526610.1	1.12e-25	115	2F6WE@1|root,2T7YX@2759|Eukaryota,392CV@33154|Opisthokonta,3C7SM@33208|Metazoa,3DNT0@33213|Bilateria,4252H@6656|Arthropoda,3SUHT@50557|Insecta,45443@7147|Diptera	33208|Metazoa	-	-	-	-	-	-	-	-	-	-	-	-	-	-	-
LOC119646600	580.18	271.901	130.579	1871.58	364.33	609.957	226.967	137.809	290.206	519.654	901.757	447.774	176.687	748.813	223.477	251.223	396.731	257.906	230.799	340.575	253.988	271.399	260.845	360.032	619.213	237.645	220.078	302.022	XP_037903023.1	7217.FBpp0120179	1.23e-97	293	KOG4186@1|root,KOG4186@2759|Eukaryota,39UQT@33154|Opisthokonta,3BB6V@33208|Metazoa,3D4CB@33213|Bilateria,41ZQZ@6656|Arthropoda,3SM18@50557|Insecta,451U4@7147|Diptera,45WQH@7214|Drosophilidae	33208|Metazoa	U	It is involved in the biological process described with peroxisome fission	PEX11G	GO:0005575,GO:0005622,GO:0005623,GO:0005737,GO:0005777,GO:0005778,GO:0006996,GO:0007031,GO:0008150,GO:0009987,GO:0016020,GO:0016043,GO:0016559,GO:0031090,GO:0031224,GO:0031231,GO:0031300,GO:0031903,GO:0032535,GO:0032991,GO:0042579,GO:0043226,GO:0043227,GO:0043229,GO:0043231,GO:0044375,GO:0044422,GO:0044424,GO:0044425,GO:0044438,GO:0044439,GO:0044444,GO:0044446,GO:0044464,GO:0048285,GO:0065007,GO:…	-	ko:K13353	ko04146,map04146	-	-	-	ko00000,ko00001,ko02000	1.A.101.1,3.A.20.1.1	-	-	PEX11
LOC119646601	145.514	202.598	237.898	75.1083	76.3739	130.42	144.482	133.962	220.291	133.614	147.804	154.484	173.302	115.277	197.494	221.19	125	141.685	180.816	111.717	135.708	160.428	149.236	138.74	111.345	145.037	168.405	121.698	XP_037903025.1	7213.XP_004535847.1	0	907	KOG0308@1|root,KOG0308@2759|Eukaryota,38H09@33154|Opisthokonta,3BF8X@33208|Metazoa,3CY00@33213|Bilateria,41TYA@6656|Arthropoda,3SJDA@50557|Insecta,44XNW@7147|Diptera	33208|Metazoa	S	Regulator of deubiquitinating complexes. Activates deubiquitination by increasing the catalytic turnover without increasing the affinity of deubiquitinating enzymes for the substrate (By similarity)	WDR48	GO:0000003,GO:0000724,GO:0000725,GO:0001501,GO:0003006,GO:0003674,GO:0003824,GO:0005488,GO:0005515,GO:0005575,GO:0005622,GO:0005623,GO:0005634,GO:0005654,GO:0006139,GO:0006259,GO:0006281,GO:0006302,GO:0006310,GO:0006464,GO:0006508,GO:0006725,GO:0006807,GO:0006950,GO:0006974,GO:0007275,GO:0007276,GO:0007283,GO:0007338,GO:0007548,GO:0008150,GO:0008152,GO:0008233,GO:0008234,GO:0008284,GO:0008406,GO:…	-	ko:K15361	ko03460,map03460	-	-	-	ko00000,ko00001,ko03400	-	-	-	DUF3337,WD40
LOC119646602	128.631	148.172	264.784	166.103	195.909	230.311	225.463	331.584	590.502	224.768	137.064	607.452	562.066	119.524	280.828	941.572	4.36037	44.6788	95.7687	16.1809	0	15.8356	26.4144	13.5151	12.465	9.24024	54.6239	54.7969	XP_037903026.1	13249.RPRC010407-PA	1.52e-229	665	COG3590@1|root,KOG3624@2759|Eukaryota,38BNF@33154|Opisthokonta,3B9I2@33208|Metazoa,3CW8Q@33213|Bilateria,41XSV@6656|Arthropoda,3SIXK@50557|Insecta,3ECH5@33342|Paraneoptera	33208|Metazoa	E	Peptidase family M13	MMEL1	GO:0001501,GO:0001503,GO:0001655,GO:0001775,GO:0001822,GO:0001990,GO:0001991,GO:0002002,GO:0002003,GO:0002252,GO:0002263,GO:0002274,GO:0002275,GO:0002283,GO:0002366,GO:0002376,GO:0002443,GO:0002444,GO:0002446,GO:0003008,GO:0003013,GO:0003044,GO:0003073,GO:0003081,GO:0003674,GO:0003824,GO:0004175,GO:0004222,GO:0005488,GO:0005575,GO:0005576,GO:0005615,GO:0005622,GO:0005623,GO:0005737,GO:0005783,GO:…	3.4.24.11	ko:K01389,ko:K08635,ko:K08636	ko04614,ko04640,ko04974,ko05010,map04614,map04640,map04974,map05010	-	-	-	ko00000,ko00001,ko01000,ko01002,ko04090,ko04147	-	-	-	Peptidase_M13,Peptidase_M13_N
LOC119646605	639.276	715.785	559.567	912.901	446.03	410.45	572.074	803.37	979.104	815.457	366.859	473.283	450.001	208.023	320.128	579.853	3104.69	2242.23	446.243	2505.26	1394.21	3067.82	437.36	896.825	2821.23	950.541	2147.05	2814.07	XP_037903033.1	7234.FBpp0181269	6.79e-32	132	KOG1721@1|root,KOG1721@2759|Eukaryota,38FYE@33154|Opisthokonta,3BJB2@33208|Metazoa,3D31F@33213|Bilateria,41VU1@6656|Arthropoda,3SKYG@50557|Insecta,4534E@7147|Diptera,45X17@7214|Drosophilidae	33208|Metazoa	K	Metal ion binding	GLIS2	GO:0000122,GO:0000976,GO:0000977,GO:0000981,GO:0000982,GO:0001012,GO:0001067,GO:0001077,GO:0001228,GO:0001655,GO:0001822,GO:0003674,GO:0003676,GO:0003677,GO:0003690,GO:0003700,GO:0005488,GO:0005575,GO:0005622,GO:0005623,GO:0005634,GO:0005654,GO:0005667,GO:0005737,GO:0005929,GO:0006139,GO:0006351,GO:0006355,GO:0006357,GO:0006366,GO:0006725,GO:0006807,GO:0006950,GO:0007154,GO:0007275,GO:0007584,GO:…	-	ko:K09233	-	-	-	-	ko00000,ko03000	-	-	-	zf-C2H2
LOC119646606	81.091	62.6054	173.828	948.975	464.603	446.001	151.483	233.256	153.22	230.852	763.95	155.379	322.724	438.614	121.645	187.397	226.744	473.61	250.196	253.031	429.429	208.149	213.157	268.509	126.316	175.572	148.703	156.334	XP_037903035.1	7217.FBpp0116586	5.84e-305	842	COG2124@1|root,KOG0159@2759|Eukaryota,38CZC@33154|Opisthokonta,3B9J4@33208|Metazoa,3CUCS@33213|Bilateria,41Y9R@6656|Arthropoda,3SH8D@50557|Insecta,451C5@7147|Diptera,45NJS@7214|Drosophilidae	33208|Metazoa	Q	Oxidoreductase activity, acting on paired donors, with incorporation or reduction of molecular oxygen	CYP301A1	GO:0002009,GO:0002165,GO:0007275,GO:0007444,GO:0007488,GO:0007490,GO:0007552,GO:0007560,GO:0008150,GO:0009653,GO:0009791,GO:0009886,GO:0009887,GO:0009888,GO:0032501,GO:0032502,GO:0035239,GO:0035295,GO:0048513,GO:0048563,GO:0048569,GO:0048707,GO:0048729,GO:0048731,GO:0048856,GO:0060429,GO:0060562	1.14.15.15	ko:K00488,ko:K15004,ko:K17951,ko:K17960	ko00120,ko01100,ko03320,ko04979,map00120,map01100,map03320,map04979	M00104	R04806,R04807,R08505,R08758,R08759,R08760,R08761,R11142	RC00099,RC00242,RC01216,RC03368	ko00000,ko00001,ko00002,ko00199,ko01000	-	-	-	p450
LOC119646608	468.176	326.78	483.011	561.88	485.07	314.354	256.244	267.691	407.498	376.698	392.209	399.447	345.867	242.229	246.009	389.386	261.629	183.839	187.917	181.025	168.587	151.697	319.012	280.245	254.31	296.671	251.148	253.019	XP_037903037.1	7159.AAEL013488-PA	0	889	COG0445@1|root,KOG2311@2759|Eukaryota,38BWB@33154|Opisthokonta,3BFG6@33208|Metazoa,3CTUH@33213|Bilateria,41TFM@6656|Arthropoda,3SKGZ@50557|Insecta,4520R@7147|Diptera,45CRE@7148|Nematocera	33208|Metazoa	J	GidA associated domain 3	MTO1	GO:0000166,GO:0000959,GO:0000963,GO:0001510,GO:0002097,GO:0002098,GO:0003674,GO:0005488,GO:0005575,GO:0005622,GO:0005623,GO:0005737,GO:0005739,GO:0006139,GO:0006396,GO:0006399,GO:0006400,GO:0006725,GO:0006807,GO:0008033,GO:0008150,GO:0008152,GO:0009451,GO:0009987,GO:0010467,GO:0016070,GO:0030488,GO:0032259,GO:0034470,GO:0034641,GO:0034660,GO:0036094,GO:0043167,GO:0043168,GO:0043170,GO:0043226,GO:…	-	ko:K03495	-	-	R08701	RC00053,RC00209,RC00870	ko00000,ko03016,ko03036	-	-	-	GIDA,GIDA_assoc
LOC119646609	182.586	51.2886	26.9211	144.451	198.335	114.436	55.4142	64.7013	82.8456	101.341	71.3235	85.1926	44.6016	166.363	38.8539	36.8647	40.6985	40.8694	21.5228	26.5666	38.1609	25.0236	95.1536	54.9969	81.4801	58.2852	40.9949	57.1865	XP_037903038.1	13037.EHJ65083	5.62e-07	57	2EZD2@1|root,2T0QM@2759|Eukaryota,391QX@33154|Opisthokonta,3C78H@33208|Metazoa,3DKNM@33213|Bilateria,424NT@6656|Arthropoda,3T1AZ@50557|Insecta,44A96@7088|Lepidoptera	33208|Metazoa	-	-	-	-	-	-	-	-	-	-	-	-	-	-	-
LOC119646610	429.371	274.37	287.346	424.816	106.818	331.013	201.36	258.654	462.225	232.124	267.786	476.175	228.893	462.832	210.841	469.283	190.409	178.766	255.843	212.674	172.399	155.881	259.964	207.34	310.157	368.266	246.822	251.197	XP_037903040.1	7370.XP_005181878.1	6.25e-120	349	COG4886@1|root,KOG1644@2759|Eukaryota,38E9Y@33154|Opisthokonta,3BGXU@33208|Metazoa,3CWN3@33213|Bilateria,41XWS@6656|Arthropoda,3SIS6@50557|Insecta,44WQN@7147|Diptera	33208|Metazoa	A	U2 small nuclear ribonucleoprotein	SNRPA1	GO:0000003,GO:0000245,GO:0000375,GO:0000377,GO:0000389,GO:0000398,GO:0003006,GO:0003674,GO:0003676,GO:0003723,GO:0005488,GO:0005515,GO:0005575,GO:0005622,GO:0005623,GO:0005634,GO:0005654,GO:0005681,GO:0005684,GO:0005686,GO:0006139,GO:0006325,GO:0006376,GO:0006396,GO:0006397,GO:0006725,GO:0006807,GO:0006996,GO:0007049,GO:0007154,GO:0007165,GO:0007166,GO:0007275,GO:0007276,GO:0007283,GO:0007346,GO:…	-	ko:K08672,ko:K11092	ko03040,map03040	M00352	-	-	ko00000,ko00001,ko00002,ko01000,ko01002,ko03041,ko03110	-	-	-	LRR_9
LOC119646612	5144.49	1506.79	1800.36	2761.9	4653.16	3535.34	3039.87	3319.61	2812.61	4397.17	3023.25	4558.24	2147.48	4790.42	2021.8	2466.09	2241.32	1927.25	1462.36	2717.16	1738.3	1673.15	2307.45	2490.18	4468.1	2453.52	2796.76	2094.15	XP_037903042.1	7260.FBpp0254469	3.07e-138	395	KOG1199@1|root,KOG1199@2759|Eukaryota,38CCA@33154|Opisthokonta,3BD0V@33208|Metazoa,3CY8V@33213|Bilateria,41TTR@6656|Arthropoda,3SIZ9@50557|Insecta,452SZ@7147|Diptera,45RTS@7214|Drosophilidae	33208|Metazoa	Q	Oxidoreductase activity. It is involved in the biological process described with metabolic process	HSD17B10	GO:0000003,GO:0000049,GO:0000166,GO:0000959,GO:0000963,GO:0000964,GO:0000965,GO:0000966,GO:0001510,GO:0001540,GO:0002165,GO:0003006,GO:0003674,GO:0003676,GO:0003723,GO:0003824,GO:0003857,GO:0004303,GO:0005102,GO:0005488,GO:0005496,GO:0005515,GO:0005575,GO:0005622,GO:0005623,GO:0005737,GO:0005739,GO:0005759,GO:0005783,GO:0005829,GO:0005886,GO:0006066,GO:0006082,GO:0006139,GO:0006163,GO:0006396,GO:…	1.1.1.178,1.1.1.35	ko:K08683	ko00280,ko01100,ko01110,ko01130,ko05010,map00280,map01100,map01110,map01130,map05010	-	R04203	RC00525	ko00000,ko00001,ko01000,ko03029,ko04147	-	-	-	adh_short
LOC119646613	0	31.3129	19.5721	15.3235	18.417	1.29481	23.657	15.4217	21.3215	23.7058	9.74415	27.9556	22.4179	15.8741	17.5913	16.8669	35.4011	17.9354	40.3299	29.6665	13.578	22.7998	22.1573	15.4676	23.8012	9.8131	15.9672	20.3853	XP_037903043.1	7213.XP_004519439.1	1.25e-292	833	COG2126@1|root,KOG3713@2759|Eukaryota,38D0S@33154|Opisthokonta,3BAS8@33208|Metazoa,3CR98@33213|Bilateria,41U4N@6656|Arthropoda,3SKHW@50557|Insecta,44YTI@7147|Diptera	33208|Metazoa	P	Voltage-gated potassium channel activity. It is involved in the biological process described with	-	GO:0003674,GO:0005215,GO:0005216,GO:0005244,GO:0005249,GO:0005261,GO:0005267,GO:0005575,GO:0005623,GO:0005886,GO:0005887,GO:0006810,GO:0006811,GO:0006812,GO:0006813,GO:0008076,GO:0008150,GO:0008324,GO:0009987,GO:0015075,GO:0015077,GO:0015079,GO:0015267,GO:0015318,GO:0015672,GO:0016020,GO:0016021,GO:0022803,GO:0022832,GO:0022836,GO:0022838,GO:0022839,GO:0022843,GO:0022857,GO:0022890,GO:0030001,GO:…	-	ko:K04887	-	-	-	-	ko00000,ko04040	1.A.1.2.2	-	-	BTB_2,Ion_trans
LOC119646614	8516.01	13419.4	13831.5	7457.29	16197.7	14708	22754.6	20705	26665.2	22009.7	19009	17243.5	22140.9	14280.1	24248.1	31652.5	17611.8	15371.5	16359.8	18684.2	17240.8	15873.2	12527.8	18078.4	10031.4	14091.2	13509.6	13997.4	XP_037903047.1	7370.XP_005174824.1	0	1630	KOG2208@1|root,KOG2208@2759|Eukaryota,38D8R@33154|Opisthokonta,3BFE4@33208|Metazoa,3CSZ5@33213|Bilateria,41VST@6656|Arthropoda,3SI35@50557|Insecta,44ZRP@7147|Diptera	33208|Metazoa	I	RNA binding	HDLBP	GO:0000785,GO:0000792,GO:0003674,GO:0003676,GO:0003677,GO:0003690,GO:0003696,GO:0003697,GO:0003723,GO:0003729,GO:0003730,GO:0005488,GO:0005575,GO:0005622,GO:0005623,GO:0005634,GO:0005694,GO:0005700,GO:0005701,GO:0005737,GO:0005829,GO:0005886,GO:0006066,GO:0006323,GO:0006325,GO:0006333,GO:0006338,GO:0006417,GO:0006629,GO:0006996,GO:0007059,GO:0008150,GO:0008152,GO:0008202,GO:0008203,GO:0008289,GO:…	-	-	-	-	-	-	-	-	-	-	KH_1
LOC119646616	1006.61	579.623	751.85	951.926	855.848	907.049	567.405	600.185	578.246	773.165	570.376	802.706	697.886	624.971	455.226	771.087	1053.8	885.039	603.902	1028.4	815.934	942.443	914.556	747.373	871.298	635.514	526.07	674.994	XP_037903050.1	7230.FBpp0170636	3.4e-36	137	COG0020@1|root,KOG2818@2759|Eukaryota,39XNK@33154|Opisthokonta,3BMKR@33208|Metazoa,3CSWG@33213|Bilateria,421BN@6656|Arthropoda,3SYZS@50557|Insecta,453ZF@7147|Diptera,45NYY@7214|Drosophilidae	33208|Metazoa	I	Transferase activity, transferring alkyl or aryl (other than methyl) groups	NUS1	GO:0001525,GO:0001568,GO:0001944,GO:0002040,GO:0002790,GO:0003674,GO:0003824,GO:0004659,GO:0005575,GO:0005622,GO:0005623,GO:0005737,GO:0005783,GO:0005789,GO:0006066,GO:0006464,GO:0006486,GO:0006629,GO:0006720,GO:0006807,GO:0006810,GO:0007154,GO:0007165,GO:0007166,GO:0007167,GO:0007169,GO:0007275,GO:0008104,GO:0008150,GO:0008152,GO:0008299,GO:0008610,GO:0009058,GO:0009059,GO:0009100,GO:0009101,GO:…	2.5.1.87	ko:K19177	ko00900,ko01110,map00900,map01110	-	R05556	RC00279,RC02839	ko00000,ko00001,ko01000	-	-	-	Prenyltransf
LOC119646617	114.721	399.59	407.039	303.321	328.007	312.021	442.238	602.785	407.457	335.077	209.621	320.381	398.601	300.992	504.849	393.227	357.557	338.26	367.604	311.661	368.915	322.036	243.903	354.962	292.49	324.265	412.673	394.101	XP_037903051.1	7213.XP_004537789.1	0	919	KOG2140@1|root,KOG2140@2759|Eukaryota,38ENJ@33154|Opisthokonta,3BAIE@33208|Metazoa,3CUJ0@33213|Bilateria,41U56@6656|Arthropoda,3SH5V@50557|Insecta,44WWG@7147|Diptera	33208|Metazoa	S	RNA binding	CWC22	GO:0000003,GO:0000228,GO:0000375,GO:0000377,GO:0000398,GO:0000785,GO:0000790,GO:0003006,GO:0003674,GO:0003676,GO:0003723,GO:0005488,GO:0005515,GO:0005575,GO:0005622,GO:0005623,GO:0005634,GO:0005654,GO:0005681,GO:0005684,GO:0005694,GO:0005737,GO:0005829,GO:0006139,GO:0006396,GO:0006397,GO:0006725,GO:0006807,GO:0007275,GO:0007276,GO:0007281,GO:0007369,GO:0008150,GO:0008152,GO:0008380,GO:0009653,GO:…	-	ko:K13100	-	-	-	-	ko00000,ko03041	-	-	-	MA3,MIF4G
LOC119646618	2348.39	2761.97	2570.9	2658.31	2439.3	2869.88	3125.17	3139.47	2313.34	2861.82	3183.31	1781.1	3014.92	3291.99	3375.75	2367.15	3471.78	4035.19	3392.25	3140.27	4214.09	4365.67	2875.48	3511.2	4307.4	3383.35	3352.99	4372.86	XP_037903053.1	7370.XP_005185079.1	2.5e-135	385	KOG0092@1|root,KOG0092@2759|Eukaryota,38HB3@33154|Opisthokonta,3B9WF@33208|Metazoa,3CUGC@33213|Bilateria,41V12@6656|Arthropoda,3SIJ4@50557|Insecta,452FC@7147|Diptera	33208|Metazoa	U	GTP binding. It is involved in the biological process described with protein transport	RAB5A	GO:0000003,GO:0000166,GO:0000323,GO:0000902,GO:0000904,GO:0001505,GO:0001667,GO:0001700,GO:0001726,GO:0001775,GO:0001882,GO:0001883,GO:0002009,GO:0002064,GO:0002065,GO:0002066,GO:0002165,GO:0002252,GO:0002263,GO:0002274,GO:0002275,GO:0002283,GO:0002366,GO:0002376,GO:0002443,GO:0002444,GO:0002446,GO:0002790,GO:0003002,GO:0003006,GO:0003674,GO:0003824,GO:0003924,GO:0005488,GO:0005515,GO:0005525,GO:…	-	ko:K07887,ko:K07888,ko:K07889	ko04014,ko04144,ko04145,ko04962,ko05014,ko05146,ko05152,map04014,map04144,map04145,map04962,map05014,map05146,map05152	-	-	-	ko00000,ko00001,ko04031,ko04131,ko04147	-	-	-	Ras
LOC119646620	461.86	151.129	265.953	669.005	53.5529	144.953	176.852	51.1818	204.479	78.0388	211.789	187.986	66.0852	635.65	170.057	112.124	20.3555	52.374	59.8225	33.928	23.6999	51.1277	91.4176	55.0053	93.969	77.7138	78.6968	56.4061	XP_037903055.1	7176.CPIJ001155-PA	8.96e-192	535	KOG0594@1|root,KOG0594@2759|Eukaryota,38B58@33154|Opisthokonta,3BH44@33208|Metazoa,3CYR4@33213|Bilateria,41TXM@6656|Arthropoda,3SGU2@50557|Insecta,44ZAH@7147|Diptera,45BD1@7148|Nematocera	33208|Metazoa	T	Belongs to the protein kinase superfamily	CDK1	GO:0000003,GO:0000075,GO:0000077,GO:0000082,GO:0000086,GO:0000187,GO:0000226,GO:0000278,GO:0000280,GO:0000302,GO:0000307,GO:0000578,GO:0000724,GO:0000725,GO:0000741,GO:0001556,GO:0001932,GO:0001934,GO:0002064,GO:0002065,GO:0002066,GO:0002082,GO:0003002,GO:0003006,GO:0003674,GO:0003682,GO:0003824,GO:0004672,GO:0004674,GO:0004693,GO:0005488,GO:0005515,GO:0005575,GO:0005622,GO:0005623,GO:0005634,GO:…	2.7.11.22,2.7.11.23	ko:K02087	ko04110,ko04114,ko04115,ko04218,ko04540,ko04914,ko05168,ko05169,ko05203,map04110,map04114,map04115,map04218,map04540,map04914,map05168,map05169,map05203	M00693	-	-	ko00000,ko00001,ko00002,ko01000,ko01001,ko03032,ko03036,ko04147	-	-	-	Pkinase
LOC119646621	824.86	295.732	129.283	169.002	226.447	275.251	150.495	207.883	218.684	179.303	184.283	252.011	151.103	177.083	164.571	175.876	98.8384	122.583	162.701	117.903	114.536	128.22	168.934	101.852	279.3	168.291	136.612	207.045	XP_037903057.1	7176.CPIJ016981-PA	2.25e-237	658	COG4725@1|root,KOG2097@2759|Eukaryota,38CG1@33154|Opisthokonta,3BG33@33208|Metazoa,3CZTV@33213|Bilateria,41W8B@6656|Arthropoda,3SIMK@50557|Insecta,44YMF@7147|Diptera,45GB3@7148|Nematocera	33208|Metazoa	K	Belongs to the MT-A70-like family	METTL14	GO:0000003,GO:0000375,GO:0000377,GO:0000381,GO:0000398,GO:0001510,GO:0001734,GO:0003006,GO:0003674,GO:0003676,GO:0003723,GO:0003729,GO:0003824,GO:0005488,GO:0005575,GO:0005622,GO:0005623,GO:0005634,GO:0005654,GO:0005737,GO:0006139,GO:0006396,GO:0006397,GO:0006401,GO:0006402,GO:0006417,GO:0006725,GO:0006807,GO:0007275,GO:0007276,GO:0007283,GO:0007399,GO:0007417,GO:0007420,GO:0007530,GO:0008150,GO:…	2.1.1.62	ko:K05925	-	-	-	-	ko00000,ko01000,ko03019	-	-	-	MT-A70
LOC119646622	15.3334	34.6591	59.9019	88.1149	20.6998	56.0025	43.1019	107.497	56.3344	100.324	89.7708	116.808	93.3306	122.643	81.1825	70.6573	59.5942	28.0972	78.9204	36.8937	27.6348	34.1162	64.9501	15.3266	49.0534	16.6522	58.4543	88.6004	XP_037903058.1	7213.XP_004527320.1	1.1e-17	80.9	2CI81@1|root,2SAVV@2759|Eukaryota,3A9IV@33154|Opisthokonta,3BUS5@33208|Metazoa,3DB1J@33213|Bilateria,421A6@6656|Arthropoda,3SP8Q@50557|Insecta,4540R@7147|Diptera	33208|Metazoa	S	Diuretic hormone	Dh31	GO:0001664,GO:0003674,GO:0005102,GO:0005179,GO:0005184,GO:0005488,GO:0005515,GO:0005575,GO:0005576,GO:0005615,GO:0006810,GO:0007154,GO:0007165,GO:0007186,GO:0007187,GO:0007188,GO:0007189,GO:0007218,GO:0007589,GO:0008150,GO:0008613,GO:0009966,GO:0009987,GO:0010469,GO:0010646,GO:0010840,GO:0010841,GO:0019932,GO:0019933,GO:0019935,GO:0023051,GO:0023052,GO:0030545,GO:0035556,GO:0042749,GO:0042752,GO:…	-	-	-	-	-	-	-	-	-	-	-
LOC119646623	25.1515	88.2828	110.473	57.7771	50.2253	37.7692	65.1572	110.827	62.9479	32.4057	28.4391	43.0185	68.5157	53.3523	82.6894	72.9619	107.559	47.2375	69.4172	58.8805	71.1184	96.2544	47.4073	73.8935	123.003	41.5921	43.2504	60.4329	XP_037903059.1	7213.XP_004536271.1	1.54e-50	187	28W1G@1|root,2R2TD@2759|Eukaryota,38EY7@33154|Opisthokonta,3BISC@33208|Metazoa,3CWB6@33213|Bilateria,420EH@6656|Arthropoda,3SNKI@50557|Insecta,453SK@7147|Diptera	33208|Metazoa	S	Metal ion binding	NUPL2	GO:0001750,GO:0003674,GO:0005049,GO:0005575,GO:0005622,GO:0005623,GO:0005634,GO:0005654,GO:0005737,GO:0005829,GO:0005929,GO:0006403,GO:0006405,GO:0006406,GO:0006611,GO:0006810,GO:0006886,GO:0006913,GO:0008104,GO:0008150,GO:0008152,GO:0010467,GO:0015031,GO:0015833,GO:0015931,GO:0016032,GO:0031503,GO:0031974,GO:0031981,GO:0033036,GO:0034613,GO:0042886,GO:0042995,GO:0043005,GO:0043170,GO:0043226,GO:…	-	ko:K14321,ko:K18716	ko03013,map03013	M00427	-	-	ko00000,ko00001,ko00002,ko03019	1.I.1	-	-	Nucleoporin_FG,zf-CCCH
LOC119646624	365.658	298.546	280.34	521.502	271.348	311.464	219.705	193.563	340.676	273.832	328.379	759.187	233.026	661.965	257.092	419.304	216.518	256.841	283.192	213.07	252.338	206.737	324.225	227.366	306.911	297.337	199.794	206.009	XP_037903060.1	7237.FBpp0280763	8.22e-87	261	KOG4018@1|root,KOG4018@2759|Eukaryota,3A3YV@33154|Opisthokonta,3BB5Q@33208|Metazoa,3CZ79@33213|Bilateria,41ZGM@6656|Arthropoda,3SMIK@50557|Insecta,452HM@7147|Diptera,45WDC@7214|Drosophilidae	33208|Metazoa	S	RWD	RWDD4	-	-	-	-	-	-	-	-	-	-	-	RWD
LOC119646625	740.582	149.162	127.028	226.808	78.9179	164.216	53.5953	41.6035	211.389	107.524	138.203	271.546	61.9828	75.6731	40.1776	112.118	31.9691	21.7249	26.282	66.6284	67.011	64.0327	181.109	49.6316	107.304	151.024	57.7431	43.449	XP_037903061.1	7370.XP_005191077.1	5.78e-116	335	COG5093@1|root,KOG4071@2759|Eukaryota,39ABE@33154|Opisthokonta,3BFYM@33208|Metazoa,3D066@33213|Bilateria,41YWJ@6656|Arthropoda,3SM8J@50557|Insecta,4526A@7147|Diptera	33208|Metazoa	L	DNA replication complex GINS protein PSF2	GINS2	GO:0000228,GO:0000278,GO:0000724,GO:0000725,GO:0000727,GO:0000811,GO:0005575,GO:0005622,GO:0005623,GO:0005634,GO:0005654,GO:0005657,GO:0005694,GO:0006139,GO:0006259,GO:0006260,GO:0006261,GO:0006270,GO:0006271,GO:0006281,GO:0006302,GO:0006310,GO:0006323,GO:0006355,GO:0006725,GO:0006807,GO:0006950,GO:0006974,GO:0006996,GO:0007049,GO:0007346,GO:0008150,GO:0008152,GO:0009058,GO:0009059,GO:0009889,GO:…	-	ko:K10733	-	M00286	-	-	ko00000,ko00002,ko03032	-	-	-	Sld5
LOC119646626	228.541	167.88	164.632	200.65	132.884	341.052	213.103	238.372	241.31	264.482	166.275	341.382	225.439	260.937	192.289	236.453	302.734	137.955	112.913	191.073	246.999	243.946	121.948	186.087	638.445	74.867	108.874	129.049	XP_037903063.1	136037.KDR16553	0.000643	51.2	KOG1721@1|root,KOG1721@2759|Eukaryota,38BZ9@33154|Opisthokonta,3BA9A@33208|Metazoa,3CT35@33213|Bilateria,41WW3@6656|Arthropoda,3SJ74@50557|Insecta	33208|Metazoa	S	Zinc finger protein	-	-	2.1.1.43	ko:K09228,ko:K20796	ko00310,map00310	-	R03875,R04866,R04867	RC00003,RC00060,RC00181,RC00496	ko00000,ko00001,ko01000,ko03000,ko03036	-	-	-	zf-AD,zf-C2H2,zf-C2H2_4,zf-C2H2_6,zf-H2C2_2,zf-H2C2_5,zf-met
LOC119646628	181.58	539.188	618.299	44.7776	1239.26	475.104	713.976	873.818	642.754	650.21	111.3	755.063	772.725	101.361	832.263	458.507	635.179	580.927	540.898	631.747	659.736	466.863	253.584	584.884	530.274	794.063	394.596	311.815	XP_037903064.1	7176.CPIJ016856-PA	4.64e-176	511	COG2124@1|root,KOG0158@2759|Eukaryota,38BTY@33154|Opisthokonta,3BF8S@33208|Metazoa,3CV2F@33213|Bilateria,41VYX@6656|Arthropoda,3SK5P@50557|Insecta,455FX@7147|Diptera,45FEX@7148|Nematocera	33208|Metazoa	Q	cytochrome P450	Cyp6a9	GO:0002118,GO:0003674,GO:0003824,GO:0004497,GO:0005575,GO:0005622,GO:0005623,GO:0005737,GO:0005783,GO:0005789,GO:0006082,GO:0006091,GO:0006629,GO:0006631,GO:0006805,GO:0006950,GO:0006952,GO:0007610,GO:0008150,GO:0008152,GO:0009055,GO:0009266,GO:0009404,GO:0009410,GO:0009605,GO:0009607,GO:0009617,GO:0009628,GO:0009636,GO:0009987,GO:0010033,GO:0010243,GO:0012505,GO:0014070,GO:0014074,GO:0016020,GO:…	-	ko:K14999,ko:K15003	-	-	-	-	ko00000,ko00199,ko01000	-	-	-	p450
LOC119646629	1073.31	1416.27	4068.2	167.553	7416.31	1733.82	7152.81	13193.1	812.512	3106.75	412.282	3534.45	1376.04	54.4214	2828.39	2100.53	11197.7	14112.2	9728.59	14995.8	6929.16	12726.8	10546.6	20579.6	5664.64	6740.28	9789.45	6468.91	XP_037903065.1	7213.XP_004525040.1	8.05e-186	545	COG2303@1|root,KOG1238@2759|Eukaryota,39Y6A@33154|Opisthokonta,3BB8M@33208|Metazoa,3D339@33213|Bilateria,41WFV@6656|Arthropoda,3SKVU@50557|Insecta,450VP@7147|Diptera	33208|Metazoa	E	flavin adenine dinucleotide binding. It is involved in the biological process described with oxidation-reduction process	-	GO:0002165,GO:0003674,GO:0003824,GO:0006629,GO:0007275,GO:0008150,GO:0008152,GO:0008202,GO:0009791,GO:0009987,GO:0010817,GO:0016491,GO:0032501,GO:0032502,GO:0034754,GO:0042180,GO:0042445,GO:0044237,GO:0044238,GO:0044281,GO:0045455,GO:0048856,GO:0055114,GO:0065007,GO:0065008,GO:0071704,GO:1901360	1.1.3.49,1.1.5.9,1.1.99.1	ko:K00108,ko:K00115,ko:K21270	ko00030,ko00260,ko01100,ko01110,ko01130,map00030,map00260,map01100,map01110,map01130	M00555	R00305,R01025	RC00066,RC00087	ko00000,ko00001,ko00002,ko01000	-	-	-	GMC_oxred_C,GMC_oxred_N
LOC119646630	74.4499	60.4885	71.8626	40.9736	76.1885	28.4476	75.6589	63.7801	79.6178	77.4988	34.3069	63.0777	92.6783	32.8838	95.7901	111.662	321.907	504.621	301.116	156.143	154.046	234.835	253.171	275.888	227.452	307.454	218.329	217.75	XP_037903067.1	7244.FBpp0229394	2.87e-210	596	KOG0490@1|root,KOG0490@2759|Eukaryota,38BZF@33154|Opisthokonta,3BD2S@33208|Metazoa,3CTZ6@33213|Bilateria,41YA0@6656|Arthropoda,3SIAI@50557|Insecta,45065@7147|Diptera,45W2S@7214|Drosophilidae	33208|Metazoa	K	binding. It is involved in the biological process described with regulation of transcription, DNA-templated	LHX2	GO:0000003,GO:0000902,GO:0000904,GO:0000976,GO:0000977,GO:0000978,GO:0000981,GO:0000982,GO:0000987,GO:0000988,GO:0000989,GO:0001012,GO:0001067,GO:0001076,GO:0001077,GO:0001228,GO:0001558,GO:0001654,GO:0001708,GO:0001838,GO:0001841,GO:0001843,GO:0001942,GO:0002009,GO:0002119,GO:0002164,GO:0002165,GO:0003002,GO:0003006,GO:0003008,GO:0003674,GO:0003676,GO:0003677,GO:0003682,GO:0003690,GO:0003700,GO:…	-	ko:K09373	-	-	-	-	ko00000,ko03000	-	-	-	Homeobox,LIM
LOC119646632	0	24.1979	8.46371	0	15.0761	21.1956	61.4138	85.9127	5.60228	21.5252	29.3734	60.2284	4.78554	56.7181	56.4218	14.1009	14.2945	0	126.95	1.42161	0	9.83889	0	160.208	196.543	11.6084	14.6629	58.4028	XP_037903072.1	7159.AAEL007340-PA	3.04e-10	69.7	COG2940@1|root,KOG2084@2759|Eukaryota,390AW@33154|Opisthokonta,3BF4T@33208|Metazoa,3CVV2@33213|Bilateria,41WNI@6656|Arthropoda,3SGGE@50557|Insecta,44XKX@7147|Diptera,45FV7@7148|Nematocera	33208|Metazoa	B	SET (Su(var)3-9, Enhancer-of-zeste, Trithorax) domain	-	GO:0001654,GO:0001745,GO:0001751,GO:0001754,GO:0003674,GO:0005488,GO:0005515,GO:0005575,GO:0005622,GO:0005623,GO:0005634,GO:0005737,GO:0005886,GO:0007275,GO:0007399,GO:0007423,GO:0008150,GO:0009653,GO:0009887,GO:0009892,GO:0009987,GO:0010468,GO:0010605,GO:0010629,GO:0016020,GO:0019222,GO:0019899,GO:0022008,GO:0030154,GO:0030182,GO:0032501,GO:0032502,GO:0042051,GO:0042461,GO:0042462,GO:0042826,GO:…	-	-	-	-	-	-	-	-	-	-	SET,zf-MYND
LOC119646633	518.523	412.333	73.4303	51.9991	10.3955	21.9321	774.038	28.2344	79.5113	3.03782	187.308	16.68	12.3817	228.36	2339.26	28.4167	21.8024	12.7664	65.8326	11.7732	18.4396	12.4513	41.9232	29.7362	39.0603	63.7688	40.2134	154.714	XP_037903073.1	7370.XP_005185783.1	2.07e-113	361	2BA8V@1|root,2S0V8@2759|Eukaryota,3A34B@33154|Opisthokonta,3BR0T@33208|Metazoa,3D81X@33213|Bilateria,41ZHT@6656|Arthropoda,3SMWU@50557|Insecta,44ZXI@7147|Diptera	33208|Metazoa	-	-	-	-	-	-	-	-	-	-	-	-	-	-	-
LOC119646634	11.2051	8.34225	4.04671	2.89058	29.5468	4.8792	6.17187	1.04756	3.31462	0	10.8287	7.02599	0.823541	0	2.08811	2.30554	7.27204	6.38586	9.58718	2.94053	1.31862	0	9.07651	1.79811	0	0	3.79499	0.806512	XP_037903075.1	7230.FBpp0167201	0	2094	COG0666@1|root,KOG3609@1|root,KOG3609@2759|Eukaryota,KOG4177@2759|Eukaryota,38GCA@33154|Opisthokonta,3B9FZ@33208|Metazoa,3CWTC@33213|Bilateria,41U79@6656|Arthropoda,3SFUA@50557|Insecta,44YAW@7147|Diptera,45XGK@7214|Drosophilidae	33208|Metazoa	MPT	Calcium channel activity. It is involved in the biological process described with calcium ion transmembrane transport	-	GO:0001964,GO:0003008,GO:0003674,GO:0005215,GO:0005216,GO:0005261,GO:0005262,GO:0005488,GO:0005515,GO:0005575,GO:0005623,GO:0005886,GO:0005887,GO:0005929,GO:0006810,GO:0006811,GO:0006812,GO:0006816,GO:0007600,GO:0007605,GO:0007610,GO:0007638,GO:0008092,GO:0008150,GO:0008324,GO:0008381,GO:0009581,GO:0009582,GO:0009605,GO:0009612,GO:0009628,GO:0009987,GO:0010996,GO:0015075,GO:0015085,GO:0015267,GO:…	-	-	-	-	-	-	-	-	-	-	Ank,Ank_2,Ank_3,Ank_4,Ion_trans
LOC119646635	72.6972	183.628	270.168	80.8869	84.9362	136.478	183.183	266.714	188.835	136.691	157.986	136.068	203.872	68.2989	168.905	234.246	222.384	191.489	204.701	164.776	175.192	196.861	143.941	131.553	223.548	152.474	172.984	171.644	XP_037903076.1	43151.ADAC000960-PA	3.87e-85	291	COG2940@1|root,KOG2084@2759|Eukaryota,390AW@33154|Opisthokonta,3BF4T@33208|Metazoa,3CVV2@33213|Bilateria,41WNI@6656|Arthropoda,3SGGE@50557|Insecta,44XKX@7147|Diptera,45FV7@7148|Nematocera	33208|Metazoa	B	SET (Su(var)3-9, Enhancer-of-zeste, Trithorax) domain	-	GO:0001654,GO:0001745,GO:0001751,GO:0001754,GO:0003674,GO:0005488,GO:0005515,GO:0005575,GO:0005622,GO:0005623,GO:0005634,GO:0005737,GO:0005886,GO:0007275,GO:0007399,GO:0007423,GO:0008150,GO:0009653,GO:0009887,GO:0009892,GO:0009987,GO:0010468,GO:0010605,GO:0010629,GO:0016020,GO:0019222,GO:0019899,GO:0022008,GO:0030154,GO:0030182,GO:0032501,GO:0032502,GO:0042051,GO:0042461,GO:0042462,GO:0042826,GO:…	-	-	-	-	-	-	-	-	-	-	SET,zf-MYND
LOC119646637	1190.92	578.78	344.135	593.742	348.343	543.758	369.036	359.91	407.849	572.089	626.02	864.707	344.616	738.635	339.457	390.112	245.581	508.606	559.114	279.803	327.187	266.362	492.669	371.773	548.159	530.873	374.559	494.047	XP_037903078.1	7234.FBpp0183829	7.82e-96	285	KOG1730@1|root,KOG1730@2759|Eukaryota,38FZ1@33154|Opisthokonta,3B98A@33208|Metazoa,3D2ZN@33213|Bilateria,41Z46@6656|Arthropoda,3SFRT@50557|Insecta,45274@7147|Diptera	33208|Metazoa	O	PITH domain	PITHD1	GO:0005575,GO:0005622,GO:0005623,GO:0005634,GO:0006950,GO:0006974,GO:0008150,GO:0009987,GO:0033554,GO:0043226,GO:0043227,GO:0043229,GO:0043231,GO:0044424,GO:0044464,GO:0050896,GO:0051716	-	-	-	-	-	-	-	-	-	-	PITH
LOC119646638	1749.67	1111.04	2641.78	9106.86	5332.33	1512.48	1938.95	3564.45	1802.74	1442.03	606.784	2642.97	3686.02	566.071	1413.94	1448.4	1037.56	2431.55	2817.91	1569.3	1803.43	1167.71	2866.84	2856.26	1029.64	2833.97	2031.93	606.006	XP_037903079.1	7217.FBpp0124189	4.65e-08	56.6	2D93Y@1|root,2TCUA@2759|Eukaryota,398DU@33154|Opisthokonta,3CCMW@33208|Metazoa,3DTYB@33213|Bilateria,4253J@6656|Arthropoda,3SSTJ@50557|Insecta,454CW@7147|Diptera,45U0J@7214|Drosophilidae	33208|Metazoa	-	-	-	-	-	-	-	-	-	-	-	-	-	-	-
LOC119646639	27.9597	34.7769	46.4874	13688.7	74.5326	34.1193	118.892	89.9487	569.818	229.845	45.9762	205.419	502.668	10.6716	56.9959	554.511	302.326	446.808	830.766	698.847	221.293	282.859	419.084	595.596	20.7759	32.3434	135.808	2.41751	XP_037903080.1	7213.XP_004521346.1	1.02e-289	802	COG2124@1|root,KOG0157@2759|Eukaryota,38CHP@33154|Opisthokonta,3B9GY@33208|Metazoa,3CSG8@33213|Bilateria,41U3I@6656|Arthropoda,3SGAE@50557|Insecta,4517P@7147|Diptera	33208|Metazoa	Q	cytochrome p450	CYP4V2	GO:0000003,GO:0000280,GO:0000910,GO:0001523,GO:0003006,GO:0003674,GO:0003824,GO:0004497,GO:0005575,GO:0005622,GO:0005623,GO:0005737,GO:0005783,GO:0005789,GO:0006082,GO:0006629,GO:0006631,GO:0006720,GO:0006721,GO:0006950,GO:0006952,GO:0006996,GO:0007049,GO:0007143,GO:0007275,GO:0007276,GO:0007281,GO:0007292,GO:0008150,GO:0008152,GO:0008202,GO:0008356,GO:0008610,GO:0009058,GO:0009605,GO:0009607,GO:…	-	ko:K07427,ko:K15001,ko:K17953,ko:K17954,ko:K17959	-	-	-	-	ko00000,ko00199,ko01000	-	-	-	p450
LOC119646640	279.674	276.913	367.218	176.217	541.041	349.753	398.993	702.998	407.476	320.948	314.203	347.618	500.161	247.597	462.994	466.957	354.651	352.326	411.834	320.642	279.277	324.567	280.496	343.283	386.415	379.764	386.918	366.671	XP_037903081.1	7159.AAEL014002-PA	9.51E-311	880	KOG1008@1|root,KOG1008@2759|Eukaryota,38BEP@33154|Opisthokonta,3BBBG@33208|Metazoa,3D36K@33213|Bilateria,41XJ0@6656|Arthropoda,3SIF3@50557|Insecta,44WVI@7147|Diptera,45BJS@7148|Nematocera	33208|Metazoa	S	Zinc-ribbon like family	MIOS	GO:0000003,GO:0000323,GO:0001674,GO:0001709,GO:0003006,GO:0005575,GO:0005622,GO:0005623,GO:0005634,GO:0005654,GO:0005737,GO:0005764,GO:0005765,GO:0005767,GO:0005773,GO:0005774,GO:0005776,GO:0005829,GO:0006139,GO:0006259,GO:0006281,GO:0006302,GO:0006725,GO:0006807,GO:0006950,GO:0006974,GO:0007154,GO:0007276,GO:0007281,GO:0007292,GO:0007293,GO:0008104,GO:0008150,GO:0008152,GO:0008361,GO:0009267,GO:…	-	ko:K20407	ko04150,map04150	-	-	-	ko00000,ko00001	-	-	-	zinc_ribbon_16
LOC119646641	205.615	452.386	390.163	132.884	230.738	186.469	387.585	333.781	371.025	304.726	287.366	258.947	342.499	209.19	376.156	358.666	274.709	288.487	347.22	222.034	293.794	285.983	242.155	236.952	323.246	335.378	367.173	403.758	XP_037903082.1	7213.XP_004522734.1	0	991	KOG0151@1|root,KOG0151@2759|Eukaryota,39PUR@33154|Opisthokonta,3B972@33208|Metazoa,3CTP5@33213|Bilateria,41Y9P@6656|Arthropoda,3SJ26@50557|Insecta,45003@7147|Diptera	33208|Metazoa	A	nucleotide binding. It is involved in the biological process described with RNA processing	U2SURP	GO:0000375,GO:0000377,GO:0000398,GO:0003674,GO:0003676,GO:0003723,GO:0003729,GO:0005488,GO:0005575,GO:0005622,GO:0005623,GO:0005634,GO:0005654,GO:0006139,GO:0006396,GO:0006397,GO:0006725,GO:0006807,GO:0008150,GO:0008152,GO:0008380,GO:0009987,GO:0010467,GO:0016070,GO:0016071,GO:0031974,GO:0031981,GO:0034641,GO:0043170,GO:0043226,GO:0043227,GO:0043229,GO:0043231,GO:0043233,GO:0044237,GO:0044238,GO:…	-	ko:K12842	ko03040,map03040	-	-	-	ko00000,ko00001,ko03041	-	-	-	RRM_1,Surp,cwf21
LOC119646642	15.1102	11.2776	27.9049	5.20119	84.335	32.9148	29.276	15.0711	4.2014	12.7594	2.25614	5.42958	95.2054	3.84327	35.6778	3.45701	7.85091	3.44745	3.10132	3.97127	16.6043	2.03526	0	12.9773	19.4498	3.12582	5.13207	31.9222	XP_037903083.1	7213.XP_004536324.1	1.4e-132	397	KOG3806@1|root,KOG3806@2759|Eukaryota,38GQW@33154|Opisthokonta,3BNXX@33208|Metazoa,3D5TI@33213|Bilateria,41WKF@6656|Arthropoda,3SI2W@50557|Insecta,44XUQ@7147|Diptera	33208|Metazoa	K	DNA binding. It is involved in the biological process described with regulation of transcription, DNA-templated	-	GO:0000981,GO:0003674,GO:0003700,GO:0005575,GO:0005622,GO:0005623,GO:0005634,GO:0006355,GO:0006357,GO:0006950,GO:0006952,GO:0008150,GO:0009605,GO:0009607,GO:0009617,GO:0009889,GO:0010468,GO:0010556,GO:0019219,GO:0019222,GO:0031323,GO:0031326,GO:0042742,GO:0043207,GO:0043226,GO:0043227,GO:0043229,GO:0043231,GO:0044424,GO:0044464,GO:0050789,GO:0050794,GO:0050896,GO:0051171,GO:0051252,GO:0051704,GO:…	-	ko:K09437,ko:K09443	ko05202,map05202	-	-	-	ko00000,ko00001,ko03000	-	-	-	Ets,SAM_PNT
LOC119646643	4.19878	11.8399	3.37022	8.66715	15.6287	2.43814	1.7623	9.42156	14.9081	9.11104	0	14.9227	11.5541	7.4727	13.9116	9.21723	0	2.55306	34.7323	0	1.31782	3.38846	17.2863	0	0	2.77147	18.207	2.41816	NA	NA	NA	NA	NA	NA	NA	NA	NA	NA	NA	NA	NA	NA	NA	NA	NA	NA	NA	NA	NA
LOC119646644	0	19.4593	13.4705	12.9986	36.3593	7.3092	13.2056	25.0882	30.6431	11.1388	15.0568	44.7709	28.0648	30.9406	20.8426	16.1269	7.2668	2.55318	38.2938	2.94412	1.31683	4.53014	82.0573	6.30753	4.15519	6.46957	28.0729	5.63976	XP_037903085.1	7159.AAEL006267-PA	2.31e-152	428	KOG0093@1|root,KOG0093@2759|Eukaryota,38F35@33154|Opisthokonta,3BAAA@33208|Metazoa,3CREC@33213|Bilateria,41VK5@6656|Arthropoda,3SJH0@50557|Insecta,44WT9@7147|Diptera,45GKT@7148|Nematocera	33208|Metazoa	U	Rab subfamily of small GTPases	RAB3B	GO:0000003,GO:0000166,GO:0000902,GO:0000904,GO:0001505,GO:0001669,GO:0001671,GO:0001775,GO:0001882,GO:0001883,GO:0002252,GO:0002263,GO:0002274,GO:0002275,GO:0002283,GO:0002366,GO:0002376,GO:0002443,GO:0002444,GO:0002446,GO:0003008,GO:0003016,GO:0003674,GO:0003824,GO:0003924,GO:0005488,GO:0005515,GO:0005525,GO:0005575,GO:0005622,GO:0005623,GO:0005737,GO:0005768,GO:0005829,GO:0005886,GO:0006464,GO:…	-	ko:K06108,ko:K07882,ko:K07883	ko04721,ko04911,map04721,map04911	-	-	-	ko00000,ko00001,ko04031,ko04131,ko04147	-	-	-	Ras
LOC119646646	0	9.05584	3.37095	0	0	6.09668	4.4067	3.14118	1.65683	1.01257	3.34054	8.78009	11.5567	3.20329	8.34873	7.68275	4.36188	1.27682	27.4298	2.94032	13.1811	2.25956	16.3807	5.407	4.98706	2.77212	6.07038	8.01233	XP_037903089.1	7213.XP_004533530.1	0	1469	KOG0498@1|root,KOG0498@2759|Eukaryota,38B8A@33154|Opisthokonta,3BAHT@33208|Metazoa,3CU2J@33213|Bilateria,41VX9@6656|Arthropoda,3SK21@50557|Insecta,450YI@7147|Diptera	33208|Metazoa	P	phosphorelay sensor kinase activity. It is involved in the biological process described with	KCNH4	GO:0000981,GO:0003674,GO:0003700,GO:0003705,GO:0005215,GO:0005216,GO:0005244,GO:0005249,GO:0005261,GO:0005267,GO:0005575,GO:0005623,GO:0005886,GO:0005887,GO:0006355,GO:0006357,GO:0006810,GO:0006811,GO:0006812,GO:0006813,GO:0008076,GO:0008150,GO:0008324,GO:0009889,GO:0009987,GO:0010468,GO:0010556,GO:0010941,GO:0015075,GO:0015077,GO:0015079,GO:0015267,GO:0015318,GO:0015672,GO:0016020,GO:0016021,GO:…	-	ko:K04906,ko:K04907,ko:K04911	-	-	-	-	ko00000,ko04040	1.A.1.20,1.A.1.20.5	-	-	Ion_trans,PAS_9,cNMP_binding
LOC119646647	722.344	429.969	430.814	889.809	390.098	385.977	326.396	251.595	457.286	417.464	363.1	532.193	281.619	481.016	317.865	446.985	260.179	297.558	248.755	364.36	271.12	194.329	453.486	329.047	197.033	258.995	251.258	265.818	XP_037903091.1	132113.XP_003492968.1	8.4e-42	152	KOG4776@1|root,KOG4776@2759|Eukaryota,39UJG@33154|Opisthokonta,3BHVU@33208|Metazoa,3CY9V@33213|Bilateria,41Z98@6656|Arthropoda,3SMKI@50557|Insecta,46IY9@7399|Hymenoptera	33208|Metazoa	K	Bucentaur or craniofacial development	CFDP1	GO:0000003,GO:0000070,GO:0000278,GO:0000280,GO:0000819,GO:0003674,GO:0005488,GO:0005515,GO:0005575,GO:0005576,GO:0005604,GO:0005622,GO:0005623,GO:0005634,GO:0005694,GO:0005700,GO:0006323,GO:0006996,GO:0007049,GO:0007059,GO:0007076,GO:0007155,GO:0008092,GO:0008150,GO:0008360,GO:0009987,GO:0010032,GO:0010941,GO:0016043,GO:0019222,GO:0019894,GO:0022402,GO:0022414,GO:0022603,GO:0022604,GO:0022610,GO:…	-	-	-	-	-	-	-	-	-	-	BCNT
LOC119646649	16.7469	54.8386	25.5829	75.096	0	45.0554	33.4379	19.8458	24.0167	23.2934	44.3791	32.4816	21.4631	82.1258	65.2637	19.9642	24.7043	25.5322	39.4724	26.5191	21.0604	21.5498	51.117	17.1215	49.0323	30.5063	40.9738	56.3827	XP_037903094.1	6500.XP_005099620.1	1.73e-29	120	2CAYR@1|root,2S3MH@2759|Eukaryota,3A5NU@33154|Opisthokonta,3BTHD@33208|Metazoa,3D9JB@33213|Bilateria	33208|Metazoa	K	Alcohol dehydrogenase transcription factor Myb/SANT-like	-	-	-	-	-	-	-	-	-	-	-	-	MADF_DNA_bdg
LOC119646650	1646.68	1007	833.931	1966.24	1083.82	1102.58	886.785	779.533	443.308	838.2	1173.37	1136.6	409.5	1433.59	733.738	481.555	839.318	635.646	282.387	710.805	915.443	957.284	598.723	1309.82	947.085	659.611	438.301	689.419	XP_037903096.1	7159.AAEL012457-PA	5.25e-111	331	COG2130@1|root,KOG1196@2759|Eukaryota,39AU4@33154|Opisthokonta,3BC1U@33208|Metazoa,3CZZB@33213|Bilateria,41UVE@6656|Arthropoda,3SFSU@50557|Insecta,4564E@7147|Diptera,45HSM@7148|Nematocera	33208|Metazoa	S	N-terminal domain of oxidoreductase	PTGR1	GO:0003674,GO:0003824,GO:0005575,GO:0005622,GO:0005623,GO:0005737,GO:0005829,GO:0006082,GO:0006690,GO:0006691,GO:0008150,GO:0008152,GO:0009987,GO:0016491,GO:0016614,GO:0016616,GO:0019752,GO:0036185,GO:0042221,GO:0042493,GO:0043436,GO:0044237,GO:0044281,GO:0044424,GO:0044444,GO:0044464,GO:0050896,GO:0055114,GO:0071704,GO:0097257,GO:0097327,GO:1901568	1.3.1.48,1.3.1.74	ko:K13948	-	-	-	-	ko00000,ko01000	-	-	-	ADH_N_2,ADH_zinc_N
LOC119646651	19.4355	2.06901	6.05157	65.1157	11.983	17.0448	5.27478	6.23763	7.47461	5.08312	0.846575	14.088	1.65614	0	0.692901	3.84537	0	0	15.5398	0	0	0	21.2429	0	6.66641	0	2.28377	0	XP_037903097.1	7159.AAEL010666-PA	4.36e-17	81.3	2D7ZU@1|root,2T83Z@2759|Eukaryota,392J5@33154|Opisthokonta,3C7XV@33208|Metazoa,3DNYE@33213|Bilateria,4257G@6656|Arthropoda,3SSNQ@50557|Insecta,4557A@7147|Diptera,45HY1@7148|Nematocera	33208|Metazoa	S	Odorant binding protein	Obp58c	GO:0003008,GO:0003674,GO:0005488,GO:0005549,GO:0005575,GO:0005576,GO:0007600,GO:0007606,GO:0008150,GO:0032501,GO:0050877	-	-	-	-	-	-	-	-	-	-	PBP_GOBP
LOC119646652	37902.5	13456.2	13383.3	57464.8	39103.3	23637.7	27623.6	21684.9	31242.4	40217	41215.4	44303.2	11158.9	65494.2	6403.03	20472.3	14762.6	26706.5	7156.26	10401.5	14504.4	17045.6	12668.8	4638.17	10065.6	346.274	5552.44	7898.45	XP_037903098.1	136037.KDR20688	2.2e-72	229	COG5640@1|root,KOG3627@2759|Eukaryota,3A0SR@33154|Opisthokonta,3BQSN@33208|Metazoa,3D7GV@33213|Bilateria,41Z8W@6656|Arthropoda,3SM0S@50557|Insecta	33208|Metazoa	O	serine-type endopeptidase activity. It is involved in the biological process described with proteolysis	-	GO:0003674,GO:0003824,GO:0004175,GO:0004252,GO:0005575,GO:0005622,GO:0005623,GO:0005737,GO:0006508,GO:0006807,GO:0008150,GO:0008152,GO:0008233,GO:0008236,GO:0016787,GO:0017171,GO:0019538,GO:0043170,GO:0044238,GO:0044424,GO:0044464,GO:0070011,GO:0071704,GO:0140096,GO:1901564	-	ko:K09640	-	-	-	-	ko00000,ko01000,ko01002	-	-	-	Trypsin
LOC119646653	0	5.2294	11.1475	39.0087	1.80202	0	9.14985	8.69478	7.74233	3.15478	0.86774	4.39544	17.2189	3.32588	9.38884	7.05093	9.05868	18.5631	26.5184	15.2033	17.7902	11.7418	12.2933	16.8454	5.17891	18.1499	43.3617	11.7196	XP_037903103.1	7176.CPIJ019283-PA	7.87e-288	807	KOG3588@1|root,KOG3588@2759|Eukaryota,38DJN@33154|Opisthokonta,3BAVK@33208|Metazoa,3CYIJ@33213|Bilateria,41WHQ@6656|Arthropoda,3SG8J@50557|Insecta,44Z6C@7147|Diptera,45GP0@7148|Nematocera	33208|Metazoa	G	Chondroitin N-acetylgalactosaminyltransferase	CSGALNACT1	GO:0000139,GO:0000271,GO:0001501,GO:0001503,GO:0001958,GO:0003674,GO:0003824,GO:0005488,GO:0005575,GO:0005622,GO:0005623,GO:0005737,GO:0005794,GO:0005975,GO:0005976,GO:0006022,GO:0006023,GO:0006024,GO:0006029,GO:0006040,GO:0006082,GO:0006139,GO:0006725,GO:0006790,GO:0006793,GO:0006807,GO:0006950,GO:0007275,GO:0007399,GO:0008037,GO:0008150,GO:0008152,GO:0008194,GO:0008283,GO:0008376,GO:0008955,GO:…	2.4.1.174,2.4.1.175	ko:K00746	ko00532,ko01100,map00532,map01100	M00058	R05929	-	ko00000,ko00001,ko00002,ko01000,ko01003	-	GT7	-	CHGN
LOC119646654	4202.9	1723.34	1549.02	4383.16	3604.61	3050.08	1935.68	2316.49	1561.85	2156.11	2423.22	2341.68	2094.4	3640.37	1916.1	1670.3	2886.33	3045.43	2019.41	2397.05	2902.79	3487.09	4088.5	2921.23	3973.1	3432.22	2433.81	3604.2	XP_037903111.1	7159.AAEL013571-PA	9.5e-44	146	COG5143@1|root,KOG0860@2759|Eukaryota,3A1KN@33154|Opisthokonta,3CNR0@33208|Metazoa,3D6Z7@33213|Bilateria	33208|Metazoa	U	Synaptobrevin	VAMP2	-	-	ko:K13504	ko04130,ko04721,ko04911,ko04962,ko04970,map04130,map04721,map04911,map04962,map04970	-	-	-	ko00000,ko00001,ko04131	-	-	-	Synaptobrevin
LOC119646655	0	16.5956	20.1631	0	12.0369	0	2.6356	1.0412	9.93699	1.01307	0.840034	0	7.43004	4.26154	0	9.97674	2.90404	0	0	2.95336	0	2.27783	6.41291	0.90127	0	2.7752	0	0	XP_037903113.1	7159.AAEL006280-PA	2.34e-66	216	2BMX3@1|root,2S1MZ@2759|Eukaryota,3A4DF@33154|Opisthokonta,3BRPH@33208|Metazoa,3D8I6@33213|Bilateria,41ZR4@6656|Arthropoda,3SMR4@50557|Insecta,44XEH@7147|Diptera,45H05@7148|Nematocera	33208|Metazoa	H	Juvenile hormone acid	jhamt	GO:0000003,GO:0003674,GO:0003824,GO:0005575,GO:0005622,GO:0005623,GO:0005737,GO:0006629,GO:0006714,GO:0006716,GO:0006718,GO:0006720,GO:0006721,GO:0007610,GO:0007617,GO:0007618,GO:0007619,GO:0008049,GO:0008150,GO:0008152,GO:0008168,GO:0008171,GO:0008299,GO:0008610,GO:0008757,GO:0009058,GO:0009987,GO:0010817,GO:0016106,GO:0016114,GO:0016740,GO:0016741,GO:0019010,GO:0019098,GO:0019953,GO:0022414,GO:…	2.1.1.325	ko:K10718	ko00981,map00981	-	R08147,R08151	RC00003,RC00460	ko00000,ko00001,ko01000	-	-	-	Methyltransf_11,Methyltransf_12,Methyltransf_23,Methyltransf_25,Methyltransf_31
LOC119646657	419.132	646.373	792.135	378.441	247.604	247.316	484.249	325.127	723.082	567.122	441.721	514.477	444.953	323.304	601.706	736.531	787.796	755.816	637.886	803.838	742.757	721.521	549.853	649.74	731.385	740.38	679.886	718.732	XP_037903115.1	7227.FBpp0088856	1.7e-80	268	KOG4211@1|root,KOG4211@2759|Eukaryota,38B9D@33154|Opisthokonta,3BBKX@33208|Metazoa,3CRF2@33213|Bilateria,41U0Q@6656|Arthropoda,3SH22@50557|Insecta,450FI@7147|Diptera,45V6F@7214|Drosophilidae	33208|Metazoa	A	nucleic acid binding	HNRNPH1	GO:0000003,GO:0000375,GO:0000377,GO:0000398,GO:0000578,GO:0003002,GO:0003006,GO:0003674,GO:0003676,GO:0003723,GO:0003727,GO:0003729,GO:0005488,GO:0005515,GO:0005575,GO:0005622,GO:0005623,GO:0005634,GO:0005654,GO:0005681,GO:0005737,GO:0005829,GO:0005886,GO:0006139,GO:0006396,GO:0006397,GO:0006403,GO:0006417,GO:0006725,GO:0006807,GO:0006950,GO:0006996,GO:0007028,GO:0007154,GO:0007165,GO:0007166,GO:…	-	ko:K12898	-	-	-	-	ko00000,ko03041	-	-	-	RRM_1,zf-RNPHF
LOC119646658	1237.62	1222.99	1093.16	743.885	482.948	595.72	1074.07	730.657	1502.51	1086.7	941.372	1007.91	1016.25	793.825	1261.64	1449.25	572.679	693.275	685.713	543.353	601.809	578.979	471.548	488.448	722.262	799.59	928.805	994.272	XP_037903116.1	7227.FBpp0088856	5.52e-102	323	KOG4211@1|root,KOG4211@2759|Eukaryota,38B9D@33154|Opisthokonta,3BBKX@33208|Metazoa,3CRF2@33213|Bilateria,41U0Q@6656|Arthropoda,3SH22@50557|Insecta,450FI@7147|Diptera,45V6F@7214|Drosophilidae	33208|Metazoa	A	nucleic acid binding	HNRNPH1	GO:0000003,GO:0000375,GO:0000377,GO:0000398,GO:0000578,GO:0003002,GO:0003006,GO:0003674,GO:0003676,GO:0003723,GO:0003727,GO:0003729,GO:0005488,GO:0005515,GO:0005575,GO:0005622,GO:0005623,GO:0005634,GO:0005654,GO:0005681,GO:0005737,GO:0005829,GO:0005886,GO:0006139,GO:0006396,GO:0006397,GO:0006403,GO:0006417,GO:0006725,GO:0006807,GO:0006950,GO:0006996,GO:0007028,GO:0007154,GO:0007165,GO:0007166,GO:…	-	ko:K12898	-	-	-	-	ko00000,ko03041	-	-	-	RRM_1,zf-RNPHF
LOC119646659	467.987	192.526	189.741	457.912	217.088	309.192	102.013	107.429	368.733	265.588	303.209	580.676	177.624	397.741	167.863	321.836	152.583	163.498	130.32	122.571	140.721	118.397	237.216	144.287	235.295	203.603	149.58	155.365	XP_037903117.1	7370.XP_005179656.1	1.58e-93	283	KOG2551@1|root,KOG2551@2759|Eukaryota,39X34@33154|Opisthokonta,3BM9A@33208|Metazoa,3D30H@33213|Bilateria,42047@6656|Arthropoda,3SMQU@50557|Insecta,451FF@7147|Diptera	33208|Metazoa	E	Serine hydrolase (FSH1)	OVCA2	GO:0001101,GO:0003674,GO:0003824,GO:0005575,GO:0005622,GO:0005623,GO:0005634,GO:0005737,GO:0008150,GO:0010033,GO:0016787,GO:0032526,GO:0033993,GO:0042221,GO:0043226,GO:0043227,GO:0043229,GO:0043231,GO:0044424,GO:0044464,GO:0050896,GO:1901700	2.5.1.108	ko:K07561	-	-	R10455	RC00021,RC03180	ko00000,ko01000,ko03012	-	-	-	FSH1
LOC119646660	4347.72	965.222	785.157	2707.01	3239.99	2184.91	980.508	1096	1194.89	1933.2	1522.24	2121.61	1057.51	2761.68	848.953	997.758	914.035	955.476	915.78	976.297	1015.24	942.886	2503.73	1316.67	1440.08	1728.9	1148.85	1065.79	XP_037903118.1	7370.XP_005179647.1	4.74e-55	174	KOG4495@1|root,KOG4495@2759|Eukaryota,3A1MC@33154|Opisthokonta,3BQKS@33208|Metazoa,3D7A4@33213|Bilateria,42009@6656|Arthropoda,3SNFS@50557|Insecta,453BQ@7147|Diptera	33208|Metazoa	K	Ubiquitin family	TCEB2	GO:0000151,GO:0000153,GO:0001666,GO:0002009,GO:0002164,GO:0002165,GO:0003002,GO:0003674,GO:0003712,GO:0003713,GO:0005488,GO:0005515,GO:0005575,GO:0005622,GO:0005623,GO:0005634,GO:0005654,GO:0005667,GO:0005737,GO:0005829,GO:0006139,GO:0006351,GO:0006354,GO:0006355,GO:0006357,GO:0006366,GO:0006368,GO:0006464,GO:0006725,GO:0006807,GO:0006950,GO:0007275,GO:0007389,GO:0007444,GO:0007472,GO:0007474,GO:…	-	ko:K03873	ko04066,ko04120,ko05200,ko05211,map04066,map04120,map05200,map05211	M00383,M00388	-	-	ko00000,ko00001,ko00002,ko03400,ko04121	-	-	-	ubiquitin
LOC119646665	120.172	131.386	115.863	85.2211	140.291	56.0451	126.794	155.788	55.4934	77.9755	87.8235	46.53	124.648	24.5422	95.1987	61.4416	106.105	63.8342	94.5521	86.8462	101.411	72.4704	76.5781	72.0908	106.38	59.1526	78.1539	94.2757	XP_037903123.1	7222.FBpp0155877	3.87e-52	187	2C8Z2@1|root,2TDAP@2759|Eukaryota,398XU@33154|Opisthokonta,3CD4R@33208|Metazoa,3DUFT@33213|Bilateria,42BV3@6656|Arthropoda,3SVHF@50557|Insecta,44X64@7147|Diptera,45RQJ@7214|Drosophilidae	33208|Metazoa	K	MADF	-	-	-	-	-	-	-	-	-	-	-	-	MADF_DNA_bdg
LOC119646666	51.7269	64.6871	74.111	20.2217	91.8699	25.5897	25.54	58.5724	51.3497	32.4009	34.272	33.3586	45.3967	28.8136	38.9247	39.169	29.0698	42.1275	45.4891	19.1258	38.1998	29.4159	50.1059	21.6252	29.0862	47.1284	50.8329	58.0204	XP_037903124.1	7213.XP_004523863.1	4.74e-96	302	KOG4585@1|root,KOG4585@2759|Eukaryota,38NKY@33154|Opisthokonta,3BK0T@33208|Metazoa,3D11T@33213|Bilateria,41ZB0@6656|Arthropoda,3SNIP@50557|Insecta,4545U@7147|Diptera	33208|Metazoa	L	Plant transposon protein	-	-	-	-	-	-	-	-	-	-	-	-	DDE_Tnp_4
LOC119646667	337.914	336.869	146.14	236.89	235.268	198.55	479.738	221.539	201.281	179.279	232.734	150.142	231.173	290.191	1022.42	137.475	82.8496	122.575	150.764	135.524	100.069	114.512	135.973	191.068	69.82	155.318	167.714	169.193	XP_037903125.1	7159.AAEL001262-PA	1.63e-201	566	28HJG@1|root,2QPX9@2759|Eukaryota,39RI6@33154|Opisthokonta,3BMBI@33208|Metazoa,3CU24@33213|Bilateria,41UE1@6656|Arthropoda,3SK4D@50557|Insecta,44Z51@7147|Diptera,45EGI@7148|Nematocera	33208|Metazoa	T	Src homology 3 domains	-	GO:0001736,GO:0001738,GO:0002009,GO:0003674,GO:0005488,GO:0005515,GO:0005575,GO:0005622,GO:0005623,GO:0005737,GO:0005886,GO:0005938,GO:0007163,GO:0007164,GO:0008104,GO:0008150,GO:0009653,GO:0009888,GO:0009966,GO:0009968,GO:0009987,GO:0010646,GO:0010648,GO:0016020,GO:0016327,GO:0023051,GO:0023057,GO:0030010,GO:0032502,GO:0033036,GO:0034613,GO:0035330,GO:0035331,GO:0044424,GO:0044425,GO:0044444,GO:…	-	-	-	-	-	-	-	-	-	-	SH3_1,SH3_2,SH3_9
LOC119646668	43.3777	73.1107	88.9608	17.3325	62.4957	19.5024	51.0988	33.4924	42.2357	48.5888	94.3508	11.4105	127.91	4.26955	69.5457	60.6737	59.5927	119.983	131.723	94.069	138.351	50.8323	60.9609	73.8728	48.1931	84.9868	90.269	106.386	XP_037903126.1	7159.AAEL003245-PA	2.26e-98	328	COG0515@1|root,KOG4250@2759|Eukaryota,38FHS@33154|Opisthokonta,3BHXK@33208|Metazoa,3CVZY@33213|Bilateria,41XBA@6656|Arthropoda,3SG9S@50557|Insecta,450Z1@7147|Diptera,45CCY@7148|Nematocera	33208|Metazoa	T	Protein tyrosine kinase	IKBKB	GO:0000165,GO:0000166,GO:0000302,GO:0001101,GO:0001666,GO:0001702,GO:0001756,GO:0001757,GO:0001776,GO:0001782,GO:0001817,GO:0001819,GO:0001959,GO:0002009,GO:0002011,GO:0002028,GO:0002218,GO:0002220,GO:0002221,GO:0002223,GO:0002224,GO:0002225,GO:0002230,GO:0002237,GO:0002252,GO:0002253,GO:0002260,GO:0002376,GO:0002429,GO:0002474,GO:0002478,GO:0002479,GO:0002520,GO:0002521,GO:0002573,GO:0002682,GO:…	2.7.11.10	ko:K04467,ko:K07209	ko01523,ko04010,ko04014,ko04062,ko04064,ko04068,ko04150,ko04151,ko04210,ko04380,ko04620,ko04621,ko04622,ko04623,ko04624,ko04657,ko04658,ko04659,ko04660,ko04662,ko04668,ko04722,ko04910,ko04920,ko04930,ko04931,ko04932,ko05120,ko05131,ko05142,ko05145,ko05160,ko05161,ko05162,ko05164,ko05165,ko05166,ko05167,ko05168,ko05169,ko05200,ko05206,ko05212,ko05215,ko05220,ko05221,ko05222,ko05418,map01523,map040…	M00686	-	-	ko00000,ko00001,ko00002,ko01000,ko01001	-	-	-	IKKbetaNEMObind,Pkinase
LOC119646669	932.864	96.0537	36.9744	395.821	920.44	566.953	93.153	197.716	54.7076	154.16	316.614	191.556	128.083	202.531	180.86	82.9394	62.4851	115.004	218.663	16.2771	157.708	134.791	914.884	219.25	93.1554	267.702	426.182	501.336	NA	NA	NA	NA	NA	NA	NA	NA	NA	NA	NA	NA	NA	NA	NA	NA	NA	NA	NA	NA	NA
LOC119646670	43.3379	190.579	194.709	124.219	60.6667	86.517	133.864	100.408	106.841	78.9776	99.475	93.0532	91.6192	102.448	125.113	131.332	66.8606	94.4679	129.284	129.47	80.3508	98.4338	80.1718	100.918	115.514	99.8022	125.945	125.71	XP_037903128.1	7370.XP_005180426.1	0	920	KOG1173@1|root,KOG1173@2759|Eukaryota,38DIV@33154|Opisthokonta,3BC0I@33208|Metazoa,3CY6I@33213|Bilateria,41W0J@6656|Arthropoda,3SI10@50557|Insecta,44Y8F@7147|Diptera	33208|Metazoa	DO	Anaphase-promoting complex, cyclosome, subunit 3	CDC16	GO:0000003,GO:0000151,GO:0000152,GO:0000209,GO:0000278,GO:0003002,GO:0003006,GO:0003674,GO:0003824,GO:0004842,GO:0005575,GO:0005622,GO:0005623,GO:0005634,GO:0005654,GO:0005680,GO:0005737,GO:0005813,GO:0005815,GO:0005819,GO:0005829,GO:0005856,GO:0006464,GO:0006508,GO:0006511,GO:0006807,GO:0007049,GO:0007088,GO:0007275,GO:0007276,GO:0007281,GO:0007292,GO:0007346,GO:0007389,GO:0008150,GO:0008152,GO:…	-	ko:K03353	ko04110,ko04111,ko04113,ko04114,ko04120,ko04914,ko05166,map04110,map04111,map04113,map04114,map04120,map04914,map05166	M00389	-	-	ko00000,ko00001,ko00002,ko01009,ko03036,ko04121	-	-	-	ANAPC3,TPR_1,TPR_7,TPR_8
LOC119646671	294.646	177.457	211.832	298.4	107.805	71.3285	218.353	106.65	356.899	293.969	130.124	394.35	168.201	155.678	111.603	440.922	167.415	306.993	277.695	79.1967	147.595	161.672	133.707	167.338	394.697	137.867	137.242	98.6864	XP_037903129.1	43151.ADAC003421-PA	4.48e-89	275	COG4229@1|root,KOG2630@2759|Eukaryota,398HV@33154|Opisthokonta,3BEY0@33208|Metazoa,3CV76@33213|Bilateria,41XV4@6656|Arthropoda,3SJNB@50557|Insecta,453CH@7147|Diptera,45DJZ@7148|Nematocera	33208|Metazoa	E	Bifunctional enzyme that catalyzes the enolization of 2,3-diketo-5-methylthiopentyl-1-phosphate (DK-MTP-1-P) into the intermediate 2-hydroxy-3-keto-5-methylthiopentenyl-1-phosphate (HK-MTPenyl-1-P), which is then dephosphorylated to form the acireductone 1,2-dihydroxy-3-keto-5-methylthiopentene (DHK- MTPene)	ENOPH1	GO:0000096,GO:0000097,GO:0003674,GO:0003824,GO:0005575,GO:0005622,GO:0005623,GO:0005737,GO:0005829,GO:0006082,GO:0006520,GO:0006555,GO:0006790,GO:0006793,GO:0006796,GO:0006807,GO:0008150,GO:0008152,GO:0008652,GO:0009058,GO:0009066,GO:0009067,GO:0009086,GO:0009987,GO:0016053,GO:0016311,GO:0016787,GO:0016788,GO:0016791,GO:0017144,GO:0019509,GO:0019752,GO:0042578,GO:0043094,GO:0043102,GO:0043436,GO:…	3.1.3.77	ko:K09880	ko00270,ko01100,map00270,map01100	M00034	R07395	RC02779	ko00000,ko00001,ko00002,ko01000	-	-	-	Hydrolase
LOC119646673	103.593	137.938	207.607	138.659	34.7457	215.775	202.67	229.29	215.31	170.039	144.368	139.55	206.286	123.83	226.78	178.949	143.894	154.436	159.292	133.692	122.558	160.279	78.199	241.417	102.195	176.41	175.971	107.2	XP_037903131.1	7213.XP_004520613.1	5.02e-227	683	KOG2687@1|root,KOG2687@2759|Eukaryota,38G26@33154|Opisthokonta,3BJMT@33208|Metazoa,3CYV6@33213|Bilateria,41YPH@6656|Arthropoda,3SJ53@50557|Insecta,451XW@7147|Diptera	33208|Metazoa	D	Sad1 / UNC-like C-terminal	SUN1	GO:0000003,GO:0000226,GO:0000280,GO:0000724,GO:0000725,GO:0001669,GO:0002080,GO:0002119,GO:0002164,GO:0003674,GO:0005488,GO:0005515,GO:0005521,GO:0005575,GO:0005622,GO:0005623,GO:0005634,GO:0005635,GO:0005637,GO:0005639,GO:0005737,GO:0006139,GO:0006259,GO:0006281,GO:0006302,GO:0006310,GO:0006725,GO:0006807,GO:0006810,GO:0006928,GO:0006950,GO:0006974,GO:0006996,GO:0006997,GO:0006998,GO:0007010,GO:…	-	ko:K19347	-	-	-	-	ko00000,ko03036	-	-	-	MRP,Sad1_UNC
LOC119646674	313.763	210.132	269.933	239.786	81.1279	185.075	160.119	86.6494	335.509	322.216	283.433	235.359	212.246	250.641	232.501	363.271	140.991	135.37	125.574	125.386	160.567	103.413	148.112	100.968	222.805	225.695	145.745	158.686	XP_037903132.1	7213.XP_004537596.1	1.73e-148	427	COG1864@1|root,KOG3721@2759|Eukaryota,38E5K@33154|Opisthokonta,3BD2Y@33208|Metazoa,3CVAJ@33213|Bilateria,41V62@6656|Arthropoda,3SGZW@50557|Insecta,451J7@7147|Diptera	33208|Metazoa	F	Metal ion binding	ENDOG	GO:0000001,GO:0000003,GO:0000737,GO:0001701,GO:0003006,GO:0003674,GO:0003676,GO:0003677,GO:0003824,GO:0004518,GO:0004519,GO:0004520,GO:0004521,GO:0004536,GO:0004540,GO:0005488,GO:0005515,GO:0005575,GO:0005622,GO:0005623,GO:0005634,GO:0005737,GO:0005739,GO:0005829,GO:0006139,GO:0006259,GO:0006260,GO:0006261,GO:0006308,GO:0006309,GO:0006310,GO:0006401,GO:0006725,GO:0006807,GO:0006915,GO:0006921,GO:…	-	ko:K01173	ko04210,map04210	-	-	-	ko00000,ko00001,ko03029	-	-	-	Endonuclease_NS
LOC119646676	35.3185	51.3502	108.636	16.2482	247.561	89.0937	168.171	295.529	79.5464	113.735	147.448	122.096	228.497	56.4235	177.479	177.492	183.195	111.89	140.567	122.854	186.521	136.574	94.9459	141.936	90.7263	85.4799	82.0654	33.6272	XP_037903137.1	7165.AGAP004847-PA	1.62e-101	322	KOG3776@1|root,KOG3776@2759|Eukaryota,39TD7@33154|Opisthokonta,3BMAI@33208|Metazoa,3D4T4@33213|Bilateria,41X0D@6656|Arthropoda,3SH41@50557|Insecta,452V0@7147|Diptera,45C27@7148|Nematocera	33208|Metazoa	T	Class B Scavenger Receptor (CD36 domain)	SCRB7	-	-	ko:K13885	ko04145,ko04913,ko04925,ko04927,ko04934,ko04975,ko04976,ko04977,ko04979,ko05160,map04145,map04913,map04925,map04927,map04934,map04975,map04976,map04977,map04979,map05160	-	-	-	ko00000,ko00001,ko04131,ko04147	9.B.39.1.3	-	-	CD36
LOC119646677	202.174	307.547	264.29	161.382	226.616	194.343	245.143	284.912	292.522	168.518	212.453	194.62	321.496	238.915	301.269	256.352	275.018	278.055	725.718	190.174	314.098	306.595	478.06	224.34	398.891	238.85	396.603	347.858	XP_037903141.1	7230.FBpp0169275	1.88e-227	650	KOG3736@1|root,KOG3736@2759|Eukaryota,38H6Z@33154|Opisthokonta,3BJTB@33208|Metazoa,3CXEE@33213|Bilateria,41UDG@6656|Arthropoda,3SGN8@50557|Insecta,44WUI@7147|Diptera,45WNF@7214|Drosophilidae	33208|Metazoa	O	Ricin-type beta-trefoil	pgant3	GO:0003674,GO:0003824,GO:0004653,GO:0005575,GO:0005622,GO:0005623,GO:0005737,GO:0005794,GO:0005795,GO:0005975,GO:0006464,GO:0006486,GO:0006493,GO:0006807,GO:0006810,GO:0007155,GO:0008150,GO:0008152,GO:0008194,GO:0008376,GO:0009058,GO:0009059,GO:0009100,GO:0009101,GO:0009311,GO:0009312,GO:0009987,GO:0012505,GO:0016043,GO:0016051,GO:0016266,GO:0016740,GO:0016757,GO:0016758,GO:0019538,GO:0022610,GO:…	2.4.1.41	ko:K00710	ko00512,ko01100,map00512,map01100	M00056	R05907	-	ko00000,ko00001,ko00002,ko01000,ko01003	-	GT27	-	Glyco_transf_7C,Glycos_transf_2,Ricin_B_lectin
LOC119646678	15.767	14.9785	21.3586	16.2738	40.9025	24.9704	6.8969	11.2065	15.2607	8.29454	7.69635	9.88934	17.7794	4.37328	23.879	17.6243	13.3989	23.5378	34.7571	7.5216	22.9116	6.9363	14.9096	16.539	16.9135	4.73084	28.2145	5.77872	XP_037903146.1	7213.XP_004518588.1	8.93e-238	699	KOG3915@1|root,KOG3915@2759|Eukaryota,38EAV@33154|Opisthokonta,3BDQE@33208|Metazoa,3CRT5@33213|Bilateria,41W2E@6656|Arthropoda,3SHS7@50557|Insecta,4510W@7147|Diptera	33208|Metazoa	K	SKI/SNO/DAC family	DACH1	GO:0000003,GO:0000122,GO:0000902,GO:0000904,GO:0000981,GO:0000982,GO:0000983,GO:0001075,GO:0001078,GO:0001227,GO:0001654,GO:0001708,GO:0001745,GO:0001751,GO:0001754,GO:0001967,GO:0002009,GO:0002165,GO:0003002,GO:0003006,GO:0003674,GO:0003700,GO:0005488,GO:0005515,GO:0005575,GO:0005622,GO:0005623,GO:0005634,GO:0005654,GO:0005667,GO:0005737,GO:0006139,GO:0006275,GO:0006351,GO:0006352,GO:0006355,GO:…	-	-	-	-	-	-	-	-	-	-	Ski_Sno
LOC119646681	17.0511	65.0152	151.762	62.3448	112.342	1058.25	205.008	118.409	52.9788	60.674	3456.56	38.3414	124.62	2170.07	94.7251	49.3834	46.206	324.298	238.778	126.927	127.487	126.57	118.071	150.929	88.8305	184.061	368.326	137.707	XP_037903165.1	7213.XP_004522717.1	6.35e-265	762	KOG3700@1|root,KOG3700@2759|Eukaryota,38GB4@33154|Opisthokonta,3BE7Z@33208|Metazoa,3D4AT@33213|Bilateria,4223T@6656|Arthropoda,3SQFA@50557|Insecta,44X6Y@7147|Diptera	33208|Metazoa	S	transferase activity, transferring acyl groups other than amino-acyl groups	-	-	-	-	-	-	-	-	-	-	-	-	Acyl_transf_3
LOC119646684	348.063	1167.41	1001.05	577.902	909.72	610.534	804.537	1100.59	696.027	526.521	570.667	525.604	994	476.203	949.827	675.808	1133.16	1207.46	1225.36	1087.86	1114.1	1095.92	710.045	1034.52	1004.5	937.455	1005	1030.45	XP_037903170.1	7370.XP_005185248.1	0	1460	KOG3689@1|root,KOG3689@2759|Eukaryota,38BQB@33154|Opisthokonta,3B9XB@33208|Metazoa,3CSEF@33213|Bilateria,41UY5@6656|Arthropoda,3SKQF@50557|Insecta,44ZX5@7147|Diptera	33208|Metazoa	T	3',5'-cyclic-nucleotide phosphodiesterase activity. It is involved in the biological process described with signal transduction	PDE5A	GO:0000166,GO:0001666,GO:0001932,GO:0001934,GO:0002026,GO:0002237,GO:0002676,GO:0002678,GO:0002682,GO:0002683,GO:0002694,GO:0002695,GO:0003008,GO:0003012,GO:0003013,GO:0003018,GO:0003674,GO:0003824,GO:0004112,GO:0004114,GO:0004115,GO:0005488,GO:0005575,GO:0005622,GO:0005623,GO:0005737,GO:0005829,GO:0006139,GO:0006163,GO:0006195,GO:0006725,GO:0006753,GO:0006793,GO:0006796,GO:0006807,GO:0006937,GO:…	3.1.4.17,3.1.4.35	ko:K13298,ko:K13762	ko00230,ko04022,ko04934,ko05032,map00230,map04022,map04934,map05032	-	R00191,R01234	RC00296	ko00000,ko00001,ko01000	-	-	-	GAF,PDEase_I
LOC119646685	370.462	725.663	1477.54	756.308	794.31	790.241	877.415	1185.06	830.326	926.19	663.59	698.38	1180.52	646.5	1360.71	1269.03	845.916	1195.9	982.216	949.924	1305.1	795.193	770.46	948.739	567.59	926.512	971.817	959.313	XP_037903923.1	7213.XP_004526546.1	5.85e-302	855	COG5253@1|root,KOG0229@2759|Eukaryota,38BAH@33154|Opisthokonta,3BABX@33208|Metazoa,3CRDG@33213|Bilateria,41VE3@6656|Arthropoda,3SIX8@50557|Insecta,452B5@7147|Diptera	33208|Metazoa	T	Phosphatidylinositol phosphate kinase activity. It is involved in the biological process described with phosphatidylinositol metabolic process	PIP5K1B	GO:0000285,GO:0000902,GO:0000904,GO:0001505,GO:0001667,GO:0001726,GO:0001775,GO:0001891,GO:0001931,GO:0002376,GO:0003674,GO:0003824,GO:0005488,GO:0005515,GO:0005516,GO:0005575,GO:0005622,GO:0005623,GO:0005634,GO:0005654,GO:0005737,GO:0005768,GO:0005829,GO:0005886,GO:0005902,GO:0005912,GO:0005924,GO:0005925,GO:0006629,GO:0006644,GO:0006650,GO:0006661,GO:0006793,GO:0006796,GO:0006810,GO:0006836,GO:…	2.7.1.68	ko:K00889,ko:K03029	ko00562,ko01100,ko03050,ko04011,ko04070,ko04072,ko04139,ko04144,ko04666,ko04810,ko05169,ko05231,map00562,map01100,map03050,map04011,map04070,map04072,map04139,map04144,map04666,map04810,map05169,map05231	M00130,M00341	R03469	RC00002,RC00078	ko00000,ko00001,ko00002,ko01000,ko03051,ko04131	-	-	-	PIP5K
LOC119646686	20.8777	10.3785	29.6037	11.5635	42.9972	26.786	23.7464	13.543	16.5859	18.2632	2.52566	16.7034	11.5742	7.46683	19.4198	26.1262	13.0859	1.27843	8.37054	17.7562	1.31528	0	19.2838	14.4423	14.9786	0	9.87998	0.805283	XP_037903176.1	43151.ADAC010278-PA	2.82e-77	249	COG2124@1|root,KOG0158@2759|Eukaryota,38BTY@33154|Opisthokonta,3BF8S@33208|Metazoa,3CV2F@33213|Bilateria,41VYX@6656|Arthropoda,3SGMH@50557|Insecta,455EK@7147|Diptera,45C09@7148|Nematocera	33208|Metazoa	Q	cytochrome P450	-	-	-	ko:K14999	-	-	-	-	ko00000,ko00199,ko01000	-	-	-	p450
LOC119646688	162.108	221.783	245.882	186.332	133.385	181.544	196.363	194.477	247.64	211.643	208.244	150.124	174.174	217.685	216.121	184.326	164.246	159.584	189.101	133.937	154.097	143.785	133.083	209.061	128.819	149.725	195.003	161.964	XP_037903177.1	43151.ADAC004126-PA	0	990	KOG0882@1|root,KOG0882@2759|Eukaryota,38E5A@33154|Opisthokonta,3BAA0@33208|Metazoa,3CYYJ@33213|Bilateria,41WN2@6656|Arthropoda,3SI3F@50557|Insecta,44Z8K@7147|Diptera,45HAD@7148|Nematocera	33208|Metazoa	O	Cyclophilin type peptidyl-prolyl cis-trans isomerase/CLD	PPWD1	GO:0000375,GO:0000377,GO:0000398,GO:0000413,GO:0003674,GO:0003755,GO:0003824,GO:0005488,GO:0005575,GO:0005622,GO:0005623,GO:0005634,GO:0005654,GO:0005681,GO:0006139,GO:0006396,GO:0006397,GO:0006464,GO:0006725,GO:0006807,GO:0008144,GO:0008150,GO:0008152,GO:0008380,GO:0009987,GO:0010467,GO:0016018,GO:0016070,GO:0016071,GO:0016604,GO:0016853,GO:0016859,GO:0018193,GO:0018208,GO:0019538,GO:0031974,GO:…	5.2.1.8	ko:K12736	-	-	-	-	ko00000,ko01000,ko03041,ko03110	-	-	-	Pro_isomerase,WD40
LOC119646689	2020.24	868.61	747.774	3139.24	1929.08	3180.25	712.004	1070.35	963.59	1181.05	2378.06	1410.27	1148.41	3639.44	1087.59	972.568	1569.8	2627.05	1429.58	1094.2	1205.26	1682.5	2338.41	2146.12	1270.21	1791.52	1458.83	1480.04	XP_037903181.1	7213.XP_004526606.1	2.22e-80	244	2CUVT@1|root,2S4EZ@2759|Eukaryota,3A6I3@33154|Opisthokonta,3BSVN@33208|Metazoa,3D9AY@33213|Bilateria,420P4@6656|Arthropoda,3SNU2@50557|Insecta,452W5@7147|Diptera	33208|Metazoa	-	-	-	GO:0007610,GO:0007635,GO:0008150,GO:0042048,GO:0042221,GO:0050896	-	-	-	-	-	-	-	-	-	-	-
LOC119646691	10681.5	2427.77	1760.28	58.7716	1001.42	1434.03	954.372	1362.69	2041.64	851.627	199.212	1196.21	462.272	458.652	1182.8	761.836	763.358	2768.42	723.598	2104.44	1128.77	2006.05	959.891	2076.68	2360.25	3611.9	1430.12	2594.17	NA	NA	NA	NA	NA	NA	NA	NA	NA	NA	NA	NA	NA	NA	NA	NA	NA	NA	NA	NA	NA
LOC119646693	489.768	95.0783	84.8346	54.89	279.916	275.23	35.1999	120.111	246.854	217.813	41.0578	162.452	137.9	58.6688	47.2115	176.644	145.351	120.034	99.2861	112.038	53.972	179.36	186.351	244.276	146.306	75.8307	90.3202	103.116	XP_037903185.1	7244.FBpp0235448	5.42e-89	273	2CDJY@1|root,2S3EM@2759|Eukaryota,3A56F@33154|Opisthokonta,3BRCJ@33208|Metazoa,3D84J@33213|Bilateria,41ZYJ@6656|Arthropoda,3SMVB@50557|Insecta,453TK@7147|Diptera,45QK9@7214|Drosophilidae	33208|Metazoa	S	Juvenile hormone binding protein domains in insects.	-	GO:0000003,GO:0005575,GO:0005576,GO:0005615,GO:0007623,GO:0008150,GO:0032501,GO:0032504,GO:0044421,GO:0048511	-	-	-	-	-	-	-	-	-	-	JHBP
LOC119646694	59.6337	34.498	60.3594	1084.04	586.999	386.143	222.69	545.066	74.2731	232.167	549.378	177.507	539.27	668.033	127.59	89.7634	534.528	214.158	56.4073	248.455	323.058	233.479	113.075	175.276	594.078	157.894	180.284	444.687	NA	NA	NA	NA	NA	NA	NA	NA	NA	NA	NA	NA	NA	NA	NA	NA	NA	NA	NA	NA	NA
LOC119646695	0	6.22256	4.70577	186.296	24.0629	23.1137	2.63628	11.4511	4.1427	17.2327	9.25081	14.9317	12.3897	19.1838	3.46499	1.53549	11.6216	0	0	23.6507	7.88505	17.1072	6.42088	2.70543	4.9883	10.1828	4.55577	4.02296	NA	NA	NA	NA	NA	NA	NA	NA	NA	NA	NA	NA	NA	NA	NA	NA	NA	NA	NA	NA	NA
LOC119646696	420.336	141.709	259.289	216.667	475.799	774.733	539.615	545.525	752.932	1253.91	757.552	993.03	356.66	1109.58	607.792	692.753	918.613	457.096	264.444	807.172	607.018	513.519	346.732	614.65	660.787	159.935	525.898	344.031	XP_037903188.1	7213.XP_004521855.1	1.24e-142	413	COG0300@1|root,KOG1014@2759|Eukaryota,39C1P@33154|Opisthokonta,3BGTQ@33208|Metazoa,3CSKI@33213|Bilateria,41VIA@6656|Arthropoda,3SGJZ@50557|Insecta,451MK@7147|Diptera	33208|Metazoa	Q	Belongs to the short-chain dehydrogenases reductases (SDR) family	-	-	1.1.1.330,1.1.1.62	ko:K10251	ko00062,ko00140,ko01040,ko01100,ko01110,ko01212,map00062,map00140,map01040,map01100,map01110,map01212	M00415	R02352,R02353,R04681,R04682,R07759,R08945,R08980,R10826	RC00029,RC00103,RC00127,RC00261	ko00000,ko00001,ko00002,ko01000,ko01004	-	-	-	adh_short
LOC119646697	290.582	129.219	94.4568	411.319	177.903	179.998	105.064	95.6991	114.421	138.82	175.098	160.012	119.803	219.521	106.36	88.7633	49.7874	81.6368	72.758	87.2914	72.2093	65.8262	118.133	85.6765	138.057	85.6427	101.082	113.249	XP_037903191.1	7159.AAEL012957-PA	1.26e-89	285	KOG0045@1|root,KOG0045@2759|Eukaryota,39N4G@33154|Opisthokonta,3CPPS@33208|Metazoa,3E5UU@33213|Bilateria,42AX9@6656|Arthropoda,3SK0G@50557|Insecta,4531E@7147|Diptera,45ERP@7148|Nematocera	33208|Metazoa	OT	XK-related protein	-	-	-	-	-	-	-	-	-	-	-	-	XK-related
LOC119646698	301.696	106.306	95.6404	0	131.536	328.917	49.3001	267.577	3.31318	139.766	171.559	251.104	165.939	57.6153	84.059	140.548	375.004	38.3031	122.06	4.41793	310.772	397.758	338.428	145.096	320.826	386.406	30.3537	269.111	XP_037903192.1	7176.CPIJ016856-PA	9.41e-162	475	COG2124@1|root,KOG0158@2759|Eukaryota,38BTY@33154|Opisthokonta,3BF8S@33208|Metazoa,3CV2F@33213|Bilateria,41VYX@6656|Arthropoda,3SK5P@50557|Insecta,455FX@7147|Diptera,45FEX@7148|Nematocera	33208|Metazoa	Q	cytochrome P450	Cyp6a9	GO:0002118,GO:0003674,GO:0003824,GO:0004497,GO:0005575,GO:0005622,GO:0005623,GO:0005737,GO:0005783,GO:0005789,GO:0006082,GO:0006091,GO:0006629,GO:0006631,GO:0006805,GO:0006950,GO:0006952,GO:0007610,GO:0008150,GO:0008152,GO:0009055,GO:0009266,GO:0009404,GO:0009410,GO:0009605,GO:0009607,GO:0009617,GO:0009628,GO:0009636,GO:0009987,GO:0010033,GO:0010243,GO:0012505,GO:0014070,GO:0014074,GO:0016020,GO:…	-	ko:K14999,ko:K15003	-	-	-	-	ko00000,ko00199,ko01000	-	-	-	p450
LOC119646699	7338.66	6444.72	8945.45	8515.56	30829.7	16845.6	18655.6	25680.1	13462.2	15830.1	12106.3	17927.3	18991.9	14526.3	15803.4	11828.8	21907.6	27080.8	34090.5	27770.2	22157.8	15785.4	30874.1	28785.1	16298.8	31199.5	23777.5	18005.1	XP_037903193.1	7370.XP_005179877.1	9.89e-135	388	COG1877@1|root,KOG1050@2759|Eukaryota,38EGS@33154|Opisthokonta,3BMA5@33208|Metazoa,3CWD5@33213|Bilateria,41VGH@6656|Arthropoda,3SJ1W@50557|Insecta,44Y9F@7147|Diptera	33208|Metazoa	G	Removes the phosphate from trehalose 6-phosphate to produce free trehalose	-	GO:0003674,GO:0003824,GO:0005575,GO:0005622,GO:0005623,GO:0005737,GO:0005975,GO:0005984,GO:0005991,GO:0005992,GO:0006793,GO:0006796,GO:0006950,GO:0008150,GO:0008152,GO:0009058,GO:0009311,GO:0009312,GO:0009987,GO:0016051,GO:0016311,GO:0016787,GO:0016788,GO:0016791,GO:0033554,GO:0034637,GO:0042578,GO:0044237,GO:0044238,GO:0044249,GO:0044262,GO:0044424,GO:0044464,GO:0046351,GO:0050896,GO:0051716,GO:…	2.4.1.15,3.1.3.12	ko:K01087,ko:K16055	ko00500,ko01100,map00500,map01100	-	R02737,R02778	RC00005,RC00017,RC00049,RC02748	ko00000,ko00001,ko01000,ko01003	-	GT20	-	Glyco_transf_20,Trehalose_PPase
LOC119646701	82.5815	151.145	1.34809	330.784	0	1403.14	5150.35	4.18753	13.2511	4.04909	4451.94	0	2.47574	3624.22	4242.45	0.768076	0	3.82939	0	0	1.31782	0	3.63858	0	0	0	2.27575	2.41812	XP_037903195.1	7370.XP_005176545.1	1.45e-237	729	COG5640@1|root,KOG3627@2759|Eukaryota,39X1U@33154|Opisthokonta,3BKY1@33208|Metazoa,3D2B5@33213|Bilateria,41TSE@6656|Arthropoda,3SHFF@50557|Insecta,452NB@7147|Diptera	33208|Metazoa	O	serine-type endopeptidase activity. It is involved in the biological process described with proteolysis	TMPRSS11D	GO:0003674,GO:0003824,GO:0004175,GO:0004252,GO:0005575,GO:0005576,GO:0005623,GO:0005886,GO:0005887,GO:0006508,GO:0006807,GO:0007585,GO:0008150,GO:0008152,GO:0008233,GO:0008236,GO:0009986,GO:0016020,GO:0016021,GO:0016787,GO:0017171,GO:0019538,GO:0031224,GO:0031226,GO:0032501,GO:0040008,GO:0043170,GO:0044238,GO:0044425,GO:0044459,GO:0044464,GO:0050789,GO:0065007,GO:0070011,GO:0071704,GO:0071944,GO:…	-	ko:K09641	-	-	-	-	ko00000,ko01000,ko01002	-	-	-	SEA,Trypsin
LOC119646702	360	920.794	892.602	204.116	341.508	490.152	1000.49	1091.62	719.471	596.437	565.929	369.875	867.038	335.883	975.574	743.23	847.399	847.588	1238.9	827.385	968.731	960.899	560.535	813.113	975.219	785.444	984.656	1183.16	XP_037903197.1	7217.FBpp0115583	0	1674	COG5076@1|root,KOG1245@2759|Eukaryota,38FE7@33154|Opisthokonta,3B9S9@33208|Metazoa,3CTK1@33213|Bilateria,41UPP@6656|Arthropoda,3SG3E@50557|Insecta,44WRY@7147|Diptera,45NDK@7214|Drosophilidae	33208|Metazoa	B	Zinc ion binding	-	GO:0000228,GO:0000785,GO:0000790,GO:0003674,GO:0005488,GO:0005515,GO:0005575,GO:0005622,GO:0005623,GO:0005634,GO:0005694,GO:0006325,GO:0006338,GO:0006355,GO:0006357,GO:0006996,GO:0007275,GO:0007399,GO:0008134,GO:0008150,GO:0009889,GO:0009891,GO:0009893,GO:0009987,GO:0010468,GO:0010556,GO:0010557,GO:0010604,GO:0010628,GO:0016043,GO:0019219,GO:0019222,GO:0031010,GO:0031323,GO:0031325,GO:0031326,GO:…	-	-	-	-	-	-	-	-	-	-	Bromodomain,CENP-B_N,DDT,MBD,PHD,WHIM1,WSD
LOC119646703	0	3.95405	4.4659	0	12.8945	0	5.83794	5.91773	12.0069	7.66719	7.11643	9.14099	5.46912	5.05232	6.58309	6.54391	0	1.20845	16.682	0	0	0	16.3719	0	0	0	6.43824	2.33648	XP_037903206.1	7370.XP_005177453.1	1.67e-188	529	KOG3510@1|root,KOG3510@2759|Eukaryota,39VUX@33154|Opisthokonta,3BE2J@33208|Metazoa,3D5X8@33213|Bilateria,41WJU@6656|Arthropoda,3SIAA@50557|Insecta,44ZA1@7147|Diptera	33208|Metazoa	T	Immunoglobulin I-set domain	-	GO:0003008,GO:0007275,GO:0007399,GO:0007600,GO:0007606,GO:0008037,GO:0008038,GO:0008039,GO:0008150,GO:0009987,GO:0016043,GO:0022008,GO:0030154,GO:0030182,GO:0032501,GO:0032502,GO:0048468,GO:0048666,GO:0048699,GO:0048731,GO:0048856,GO:0048869,GO:0050808,GO:0050877,GO:0071840	-	-	-	-	-	-	-	-	-	-	I-set,Ig_3,V-set
LOC119646704	27.9265	15.2805	29.632	33.2224	70.9254	40.1972	14.084	36.5746	4.96989	32.4122	10.8833	28.0968	7.43057	6.40125	54.1771	7.68019	23.256	6.38411	7.1792	22.0964	6.58349	6.80278	2.73775	22.5316	18.2862	31.4336	1.51777	7.25113	XP_037903212.1	7159.AAEL009127-PA	1.89e-170	497	COG2124@1|root,KOG0158@2759|Eukaryota,38BTY@33154|Opisthokonta,3BF8S@33208|Metazoa,3CV2F@33213|Bilateria,41VYX@6656|Arthropoda,3SGMH@50557|Insecta,44XUS@7147|Diptera,45FWK@7148|Nematocera	33208|Metazoa	Q	cytochrome P450	Cyp6a9	GO:0002118,GO:0003674,GO:0003824,GO:0004497,GO:0005575,GO:0005622,GO:0005623,GO:0005737,GO:0005783,GO:0005789,GO:0006082,GO:0006091,GO:0006629,GO:0006631,GO:0006805,GO:0006950,GO:0006952,GO:0007610,GO:0008150,GO:0008152,GO:0009055,GO:0009266,GO:0009404,GO:0009410,GO:0009605,GO:0009607,GO:0009617,GO:0009628,GO:0009636,GO:0009987,GO:0010033,GO:0010243,GO:0012505,GO:0014070,GO:0014074,GO:0016020,GO:…	-	ko:K14999,ko:K15003	-	-	-	-	ko00000,ko00199,ko01000	-	-	-	p450
LOC119646708	25.1277	6.24922	6.06097	3558.07	3.45813	2298.53	888.135	6.26894	10.7695	6.0785	3889.95	1.75632	7.4319	5761.26	1385.53	7.68096	0	0	5.98249	2.94757	5.26671	1.1346	8.2181	1.80284	0	0	9.1082	6.44574	XP_037903214.1	7165.AGAP010196-PA	1.84e-160	449	KOG4297@1|root,KOG4297@2759|Eukaryota,39UXB@33154|Opisthokonta,3BJ6G@33208|Metazoa,3D2A5@33213|Bilateria,41V54@6656|Arthropoda,3SIPR@50557|Insecta,452JC@7147|Diptera,45E07@7148|Nematocera	33208|Metazoa	TV	C-type lectin (CTL) or carbohydrate-recognition domain (CRD)	CTLGA1	GO:0003674,GO:0005488,GO:0030246	-	-	-	-	-	-	-	-	-	-	Lectin_C
LOC119646709	1219.8	889.045	947.767	1247.99	479.708	510.487	537.099	674.351	627.824	521.534	568.809	673.375	443.292	625.283	567	656.657	563.957	625.581	558.92	482.839	547.868	519.808	656.444	568.624	549.361	655.317	619.928	584.181	XP_037903215.1	7370.XP_005175089.1	4.82e-129	390	KOG3973@1|root,KOG3973@2759|Eukaryota,38C4H@33154|Opisthokonta,3BGFC@33208|Metazoa,3CUA4@33213|Bilateria,41WZK@6656|Arthropoda,3SI1H@50557|Insecta,44Z55@7147|Diptera	33208|Metazoa	S	Protein of unknown function (DUF2465)	FAM98A	GO:0003674,GO:0003676,GO:0003723,GO:0003824,GO:0005488,GO:0005515,GO:0005575,GO:0005622,GO:0005623,GO:0005634,GO:0005654,GO:0005737,GO:0006464,GO:0006479,GO:0006807,GO:0008150,GO:0008152,GO:0008168,GO:0008213,GO:0008276,GO:0008284,GO:0009893,GO:0009987,GO:0010468,GO:0010604,GO:0010628,GO:0016740,GO:0016741,GO:0019222,GO:0019538,GO:0031344,GO:0031346,GO:0031974,GO:0031981,GO:0032259,GO:0032418,GO:…	-	ko:K15434	-	-	-	-	ko00000,ko03016	-	-	-	DUF2465
LOC119646711	999.234	337.349	310.405	505.564	852.074	1243.47	575.557	931.757	435.716	872.223	265.565	596.229	429.374	984.606	478.41	527.628	1059.61	1174.77	340.943	694.22	767.497	1006.62	520.566	447.976	1202	535.405	459.176	1038.43	NA	NA	NA	NA	NA	NA	NA	NA	NA	NA	NA	NA	NA	NA	NA	NA	NA	NA	NA	NA	NA
LOC119646712	130.119	263.396	220.014	147.487	81.5194	136.612	153.055	209.953	213.779	184.005	85.3241	127.765	175.57	93.9257	171.145	161.252	160.054	182.754	220.475	142.477	176.365	140.461	129.552	171.952	212.98	175.605	217.09	179.885	XP_037903219.1	7213.XP_004525118.1	1.16e-30	134	KOG1721@1|root,KOG1721@2759|Eukaryota,3AKZ4@33154|Opisthokonta,3C0KF@33208|Metazoa,3DGM6@33213|Bilateria,422JF@6656|Arthropoda,3SQHT@50557|Insecta,44YZW@7147|Diptera	33208|Metazoa	S	Zinc ion binding	-	GO:0000976,GO:0001067,GO:0003674,GO:0003676,GO:0003677,GO:0003690,GO:0003700,GO:0005488,GO:0005575,GO:0005622,GO:0005623,GO:0005634,GO:0006355,GO:0008150,GO:0009889,GO:0010468,GO:0010556,GO:0019219,GO:0019222,GO:0031323,GO:0031326,GO:0043226,GO:0043227,GO:0043229,GO:0043231,GO:0043565,GO:0044212,GO:0044424,GO:0044464,GO:0050789,GO:0050794,GO:0051171,GO:0051252,GO:0060255,GO:0065007,GO:0080090,GO:…	-	-	-	-	-	-	-	-	-	-	zf-AD,zf-C2H2,zf-C2H2_4,zf-C2H2_6,zf-met
LOC119646713	307.763	336.904	743.296	137.217	1648.49	764.188	860.66	1356.18	457.979	721.799	75.1708	630.238	435.746	157.964	1093.09	626.705	1925.87	795.239	401.119	1346.72	590.248	1027.27	579.792	1258.6	1453.33	567.25	726.741	593.964	XP_037903223.1	69319.XP_008560133.1	4.57e-231	692	COG2124@1|root,KOG0158@2759|Eukaryota,38BTY@33154|Opisthokonta,3BF8S@33208|Metazoa,3D3J9@33213|Bilateria,41X57@6656|Arthropoda,3SZNZ@50557|Insecta,46KZH@7399|Hymenoptera	33208|Metazoa	Q	Cytochrome P450	-	-	-	ko:K14999	-	-	-	-	ko00000,ko00199,ko01000	-	-	-	p450
LOC119646714	211.546	231.788	188.993	413.154	134.196	161.862	207.481	87.5109	224.591	183.517	196.758	216.129	146.24	189.781	192.754	225.031	186.003	144.365	163.758	202.493	161.717	201.796	198.081	154.243	172.138	168.504	137.462	125.565	XP_037903220.1	7159.AAEL010895-PA	4.99e-79	236	COG0284@1|root,KOG1743@2759|Eukaryota,3A47E@33154|Opisthokonta,3BPD7@33208|Metazoa,3D67H@33213|Bilateria,41Z7N@6656|Arthropoda,3SMFP@50557|Insecta,453BF@7147|Diptera,45I68@7148|Nematocera	33208|Metazoa	P	Got1/Sft2-like family	GOLT1B	GO:0005575,GO:0005622,GO:0005623,GO:0005737,GO:0005783,GO:0012505,GO:0043226,GO:0043227,GO:0043229,GO:0043231,GO:0044424,GO:0044444,GO:0044464	-	-	-	-	-	-	-	-	-	-	Got1
LOC119646715	2799.52	1731.32	1248.11	1437.3	1219.79	1175.9	1237.35	1055.5	1199.84	1275.24	1131.39	1592.69	1048.4	1045	1408.78	1517.77	985.249	956.723	1019.84	990.919	1346.71	973.391	1194.35	1069.53	1279.58	1238.28	1176.91	1263.04	XP_037903221.1	7370.XP_005177971.1	3.82e-135	387	COG0638@1|root,KOG0176@2759|Eukaryota,38CVS@33154|Opisthokonta,3BED7@33208|Metazoa,3CTCZ@33213|Bilateria,41TUW@6656|Arthropoda,3SIUH@50557|Insecta,451RF@7147|Diptera	33208|Metazoa	O	The proteasome is a multicatalytic proteinase complex which is characterized by its ability to cleave peptides with Arg, Phe, Tyr, Leu, and Glu adjacent to the leaving group at neutral or slightly basic pH	PSMA5	GO:0000502,GO:0001775,GO:0002252,GO:0002263,GO:0002274,GO:0002275,GO:0002283,GO:0002366,GO:0002376,GO:0002443,GO:0002444,GO:0002446,GO:0003674,GO:0005488,GO:0005515,GO:0005575,GO:0005576,GO:0005622,GO:0005623,GO:0005634,GO:0005654,GO:0005737,GO:0005829,GO:0005839,GO:0006464,GO:0006508,GO:0006511,GO:0006807,GO:0006810,GO:0006887,GO:0006955,GO:0008150,GO:0008152,GO:0009056,GO:0009057,GO:0009987,GO:…	3.4.25.1	ko:K02729	ko03050,map03050	M00337,M00340	-	-	ko00000,ko00001,ko00002,ko01000,ko01002,ko03051	-	-	-	Proteasome,Proteasome_A_N
LOC119646717	428.348	501.561	450.257	222.432	210.192	335.238	357.749	321.411	443.873	269.233	308.784	288.756	371.32	292.49	379.809	382.475	303.777	336.954	450.321	340.86	346.582	363.484	288.267	285.559	296.618	393.467	371.666	347.388	XP_037903224.1	7213.XP_004531196.1	0	1253	KOG3766@1|root,KOG3766@2759|Eukaryota,38EBR@33154|Opisthokonta,3BA62@33208|Metazoa,3CS6Y@33213|Bilateria,41TIH@6656|Arthropoda,3SID1@50557|Insecta,44ZEJ@7147|Diptera	33208|Metazoa	K	Zinc ion binding. It is involved in the biological process described with regulation of transcription, DNA-templated	MBTD1	GO:0000003,GO:0000785,GO:0001501,GO:0002119,GO:0002164,GO:0003006,GO:0003674,GO:0003682,GO:0005488,GO:0005515,GO:0005575,GO:0005622,GO:0005623,GO:0005634,GO:0005654,GO:0005694,GO:0006325,GO:0006342,GO:0006355,GO:0006996,GO:0007275,GO:0007276,GO:0007281,GO:0007292,GO:0007398,GO:0007444,GO:0007446,GO:0008150,GO:0008283,GO:0009790,GO:0009791,GO:0009792,GO:0009888,GO:0009889,GO:0009890,GO:0009892,GO:…	-	-	-	-	-	-	-	-	-	-	MBT,SAM_1,THAP
LOC119646718	334.25	418.211	547.144	244.103	277.513	223.021	328.547	292.942	243.489	328.024	262.353	230.863	213.76	191.04	362.218	312.585	286.337	322.959	251.422	245.598	330.667	371.986	196.678	320.75	454.549	392.682	602.364	564.926	XP_037903225.1	7159.AAEL001191-PA	2.45e-234	672	28KV9@1|root,2QTBN@2759|Eukaryota,38DU3@33154|Opisthokonta,3BBCZ@33208|Metazoa,3CTUR@33213|Bilateria,41V4F@6656|Arthropoda,3SFVN@50557|Insecta,45526@7147|Diptera,45HB7@7148|Nematocera	33208|Metazoa	S	Calcineurin-like phosphoesterase	TMEM62	-	-	-	-	-	-	-	-	-	-	-	Metallophos
LOC119646719	284.761	367.292	461.939	533.006	290.469	286.224	327.411	304.021	424.938	439.629	337.517	482.059	275.776	392.582	245.14	411.658	438.959	370.296	356.525	458.284	344.939	442.425	200.857	371.344	388.186	266.293	328.619	310.977	XP_037903226.1	7370.XP_005187153.1	7.99e-208	584	COG0472@1|root,KOG2788@2759|Eukaryota,38CE1@33154|Opisthokonta,3BAR2@33208|Metazoa,3CZ9H@33213|Bilateria,41W2V@6656|Arthropoda,3SG3Q@50557|Insecta,44ZR3@7147|Diptera	33208|Metazoa	G	phospho-N-acetylmuramoyl-pentapeptide-transferase activity	DPAGT1	GO:0003674,GO:0003824,GO:0003975,GO:0003976,GO:0005575,GO:0005622,GO:0005623,GO:0005737,GO:0005783,GO:0005789,GO:0006040,GO:0006047,GO:0006066,GO:0006139,GO:0006464,GO:0006486,GO:0006487,GO:0006488,GO:0006489,GO:0006490,GO:0006629,GO:0006644,GO:0006720,GO:0006725,GO:0006793,GO:0006796,GO:0006807,GO:0008150,GO:0008152,GO:0008299,GO:0008610,GO:0008654,GO:0009058,GO:0009059,GO:0009100,GO:0009101,GO:…	2.7.8.15	ko:K01001	ko00510,ko01100,map00510,map01100	M00055	R05969	RC00002	ko00000,ko00001,ko00002,ko01000,ko01003	-	-	-	Glycos_transf_4
LOC119646721	756.93	252.325	179.707	730.92	420.912	345.757	183.845	211.866	241.906	283.743	323.837	405.754	214.742	541.764	226.204	223.492	194.771	172.414	173.387	112.154	210.553	171.711	292.723	148.758	208.684	188.723	136.646	194.116	XP_037903228.1	7222.FBpp0156183	2.14e-142	410	KOG0226@1|root,KOG0226@2759|Eukaryota,38DU1@33154|Opisthokonta,3B94F@33208|Metazoa,3CSIQ@33213|Bilateria,41YRB@6656|Arthropoda,3SM51@50557|Insecta,452RU@7147|Diptera,45W0Q@7214|Drosophilidae	33208|Metazoa	A	nucleic acid binding	RBM42	GO:0000375,GO:0000377,GO:0000398,GO:0001654,GO:0002088,GO:0003674,GO:0003676,GO:0003723,GO:0003729,GO:0005488,GO:0006139,GO:0006396,GO:0006397,GO:0006725,GO:0006807,GO:0007275,GO:0007423,GO:0008150,GO:0008152,GO:0008380,GO:0009892,GO:0009987,GO:0010467,GO:0010468,GO:0010605,GO:0010629,GO:0016070,GO:0016071,GO:0019219,GO:0019222,GO:0031323,GO:0031324,GO:0032501,GO:0032502,GO:0033119,GO:0034641,GO:…	-	-	-	-	-	-	-	-	-	-	RRM_1
LOC119646722	980.163	152.213	76.7456	1654.97	1560.68	976.532	614.273	382.035	415.216	1043.66	708.248	857.604	413.696	980.711	209.72	191.42	518.898	1428.15	1860.48	297.323	125.527	459.1	4837.53	1077.4	2237.18	2467.68	1177.08	1478.78	XP_037903229.1	13249.RPRC001725-PA	0.000853	45.8	KOG0226@1|root,KOG0226@2759|Eukaryota,38DU1@33154|Opisthokonta,3B94F@33208|Metazoa,3CSIQ@33213|Bilateria,41YRB@6656|Arthropoda,3SM51@50557|Insecta,3EADF@33342|Paraneoptera	33208|Metazoa	A	RNA recognition motif	RBM42	GO:0000375,GO:0000377,GO:0000398,GO:0001654,GO:0002088,GO:0003674,GO:0003676,GO:0003723,GO:0003729,GO:0005488,GO:0006139,GO:0006396,GO:0006397,GO:0006725,GO:0006807,GO:0007275,GO:0007423,GO:0008150,GO:0008152,GO:0008380,GO:0009892,GO:0009987,GO:0010467,GO:0010468,GO:0010605,GO:0010629,GO:0016070,GO:0016071,GO:0019219,GO:0019222,GO:0031323,GO:0031324,GO:0032501,GO:0032502,GO:0033119,GO:0034641,GO:…	-	-	-	-	-	-	-	-	-	-	RRM_1
LOC119646724	1924.88	496.963	390.361	2549.56	719.217	1051.85	894.554	234.808	333.867	865.443	1527.94	692.077	363.418	3296.36	1287.06	355.591	507.278	422.741	283.387	550.502	517.151	506.131	589.195	783.475	439.824	448.698	424.371	357.619	XP_037903231.1	7213.XP_004536193.1	1.36e-68	210	KOG1736@1|root,KOG1736@2759|Eukaryota,3A0DU@33154|Opisthokonta,3BPN2@33208|Metazoa,3CUCE@33213|Bilateria,4204X@6656|Arthropoda,3SNBS@50557|Insecta,4530B@7147|Diptera	33208|Metazoa	W	binding. It is involved in the biological process described with negative regulation of Arp2 3 complex-mediated actin nucleation	GMFG	GO:0000003,GO:0001667,GO:0001775,GO:0001932,GO:0001933,GO:0002064,GO:0002065,GO:0002066,GO:0002252,GO:0002263,GO:0002274,GO:0002275,GO:0002283,GO:0002366,GO:0002376,GO:0002443,GO:0002444,GO:0002446,GO:0003006,GO:0003008,GO:0003674,GO:0004857,GO:0004860,GO:0005488,GO:0005575,GO:0005576,GO:0005622,GO:0005623,GO:0005634,GO:0005737,GO:0006464,GO:0006468,GO:0006469,GO:0006793,GO:0006796,GO:0006807,GO:…	-	-	-	-	-	-	-	-	-	-	Cofilin_ADF
LOC119646725	304.091	101.484	157.899	343.669	22.9766	165.61	185.756	101.127	133.299	67.3851	267.443	117.261	52.8339	509.794	222.849	61.6313	28.5777	16.9281	44.8483	37.1446	24.3931	30.0154	55.7709	47.489	45.635	24.87	60.8649	22.3715	XP_037903232.1	7213.XP_004521465.1	1.22e-149	450	2CN9Q@1|root,2QUQ2@2759|Eukaryota,38YK9@33154|Opisthokonta,3BIBX@33208|Metazoa,3CSZZ@33213|Bilateria,41UJT@6656|Arthropoda,3SK5T@50557|Insecta,44YZE@7147|Diptera	33208|Metazoa	S	SHC SH2 domain-binding protein	SHCBP1	GO:0000003,GO:0000280,GO:0000910,GO:0003006,GO:0003674,GO:0005488,GO:0005515,GO:0005575,GO:0005576,GO:0005622,GO:0005623,GO:0005737,GO:0006810,GO:0006996,GO:0007010,GO:0007049,GO:0007112,GO:0007140,GO:0007154,GO:0007165,GO:0007166,GO:0007167,GO:0007169,GO:0007276,GO:0007281,GO:0007292,GO:0007300,GO:0008150,GO:0008335,GO:0008543,GO:0009719,GO:0009987,GO:0010033,GO:0016043,GO:0019904,GO:0019953,GO:…	-	-	-	-	-	-	-	-	-	-	Beta_helix
LOC119646726	474.225	204.598	130.269	745.526	256.514	320.96	129.933	159.899	210.625	212.14	295.744	245.281	132.285	516.747	193.062	135.156	142.407	136.781	159.957	112.753	122.108	130.803	269.187	172.429	168.904	171.554	126.173	158.433	XP_037903234.1	7159.AAEL001972-PA	4.33e-75	226	COG5248@1|root,KOG3901@2759|Eukaryota,3A3W7@33154|Opisthokonta,3BRVA@33208|Metazoa,3D6MK@33213|Bilateria,41Z6F@6656|Arthropoda,3SMNW@50557|Insecta,458UD@7147|Diptera,45I5T@7148|Nematocera	33208|Metazoa	J	Transcription initiation factor IID, 18kD subunit	TAF13	GO:0000428,GO:0003674,GO:0003676,GO:0003677,GO:0003700,GO:0003712,GO:0005488,GO:0005515,GO:0005575,GO:0005622,GO:0005623,GO:0005634,GO:0005654,GO:0005667,GO:0005669,GO:0005730,GO:0006139,GO:0006351,GO:0006352,GO:0006355,GO:0006357,GO:0006366,GO:0006367,GO:0006725,GO:0006807,GO:0008022,GO:0008150,GO:0008152,GO:0009058,GO:0009059,GO:0009301,GO:0009889,GO:0009966,GO:0009987,GO:0010467,GO:0010468,GO:…	-	ko:K03127	ko03022,ko05168,map03022,map05168	-	-	-	ko00000,ko00001,ko03021	-	-	-	TFIID-18kDa
LOC119646729	4783.08	702.439	493.526	3152.15	2218.51	1771.66	554.613	495.526	702.033	1192.57	1139.51	1431.32	575.088	1698.21	556.567	521.455	589.985	656.76	611.861	591.629	624.365	617.526	1736.81	682.94	1016.33	625.141	555.267	636.588	XP_037903238.1	7370.XP_005179878.1	2.3e-127	365	COG5080@1|root,KOG2946@2759|Eukaryota,38DNV@33154|Opisthokonta,3BGE3@33208|Metazoa,3D0Y3@33213|Bilateria,41WPJ@6656|Arthropoda,3SH59@50557|Insecta,450A9@7147|Diptera	33208|Metazoa	U	Yip1 domain	YIPF6	GO:0000138,GO:0002064,GO:0002065,GO:0002066,GO:0003674,GO:0005488,GO:0005515,GO:0005575,GO:0005622,GO:0005623,GO:0005737,GO:0005783,GO:0005794,GO:0005795,GO:0005797,GO:0005798,GO:0005801,GO:0005802,GO:0007275,GO:0008150,GO:0009888,GO:0009987,GO:0012505,GO:0030134,GO:0030135,GO:0030154,GO:0030855,GO:0031410,GO:0031982,GO:0031984,GO:0031985,GO:0032501,GO:0032502,GO:0035295,GO:0042802,GO:0043226,GO:…	-	-	-	-	-	-	-	-	-	-	Yip1
LOC119646730	1735.88	2155.73	1806.56	160.329	866.322	692.749	2208.01	5799.51	1552.37	1094.28	3494.47	4622.64	1147.9	4615.66	4486.38	2237.86	10867.2	14.0471	0	2684.83	6915.55	1058.11	20.1155	3729.33	1910.38	53.6474	0.759053	782.089	XP_037903239.1	7370.XP_005180154.1	1.35e-100	306	28N19@1|root,2R63T@2759|Eukaryota,39YAF@33154|Opisthokonta,3BP5G@33208|Metazoa,3D09Z@33213|Bilateria,41Y9V@6656|Arthropoda,3SQJT@50557|Insecta,4556N@7147|Diptera	33208|Metazoa	O	Phosphatidylcholine 1-acylhydrolase activity. It is involved in the biological process described with lipid metabolic process	-	GO:0003674,GO:0003824,GO:0006629,GO:0008150,GO:0008152,GO:0009056,GO:0016042,GO:0016298,GO:0016787,GO:0016788,GO:0044238,GO:0071704,GO:1901575	-	-	-	-	-	-	-	-	-	-	Lipase
LOC119646733	0	2.08566	43.7937	7.22383	1.73202	51.1815	177.896	74.2447	0	32.4141	0	1.75629	0	3.20181	2.08497	39.9463	266.052	10.216	2.39416	0	0	3.39859	20.9764	32.4492	0	0	69.0663	0.805946	XP_037903242.1	7176.CPIJ016856-PA	4.82e-152	454	COG2124@1|root,KOG0158@2759|Eukaryota,38BTY@33154|Opisthokonta,3BF8S@33208|Metazoa,3CV2F@33213|Bilateria,41VYX@6656|Arthropoda,3SK5P@50557|Insecta,455FX@7147|Diptera,45FEX@7148|Nematocera	33208|Metazoa	Q	cytochrome P450	Cyp6a9	GO:0002118,GO:0003674,GO:0003824,GO:0004497,GO:0005575,GO:0005622,GO:0005623,GO:0005737,GO:0005783,GO:0005789,GO:0006082,GO:0006091,GO:0006629,GO:0006631,GO:0006805,GO:0006950,GO:0006952,GO:0007610,GO:0008150,GO:0008152,GO:0009055,GO:0009266,GO:0009404,GO:0009410,GO:0009605,GO:0009607,GO:0009617,GO:0009628,GO:0009636,GO:0009987,GO:0010033,GO:0010243,GO:0012505,GO:0014070,GO:0014074,GO:0016020,GO:…	-	ko:K14999,ko:K15003	-	-	-	-	ko00000,ko00199,ko01000	-	-	-	p450
LOC119646736	386.004	304.098	425.859	150.217	72.8495	202.305	192.902	179.953	333.761	161.986	187.151	223.84	165.89	185.704	278.793	368.65	186.046	90.6326	203.533	120.591	191.024	130.021	260.409	181.097	220.21	129.353	161.591	186.16	XP_037903241.1	7213.XP_004520590.1	9.67e-205	592	KOG3091@1|root,KOG3091@2759|Eukaryota,3988N@33154|Opisthokonta,3BGQ5@33208|Metazoa,3CTFW@33213|Bilateria,41YHW@6656|Arthropoda,3SJK0@50557|Insecta,44XVH@7147|Diptera	33208|Metazoa	UY	Nucleoporin complex subunit 54	NUP54	GO:0000003,GO:0000132,GO:0000226,GO:0000278,GO:0003006,GO:0003674,GO:0005198,GO:0005488,GO:0005515,GO:0005516,GO:0005575,GO:0005622,GO:0005623,GO:0005634,GO:0005635,GO:0005643,GO:0006403,GO:0006405,GO:0006406,GO:0006605,GO:0006606,GO:0006607,GO:0006611,GO:0006810,GO:0006886,GO:0006913,GO:0006996,GO:0006997,GO:0006999,GO:0007010,GO:0007017,GO:0007049,GO:0007163,GO:0007275,GO:0007276,GO:0007281,GO:…	-	ko:K14308	ko03013,map03013	M00427	-	-	ko00000,ko00001,ko00002,ko03019	1.I.1	-	-	Nup54
LOC119646737	23.7565	0	3.36825	144.446	3.46432	565.346	347.818	0	1.65655	1.01268	962.679	0.877938	3.30198	2027.47	125.085	0.768038	0	0	5.98455	1.47193	0	0	3.64642	0.901148	0	0	4.55271	5.6406	XP_037903243.1	7159.AAEL005685-PA	0	928	29D7G@1|root,2RKBA@2759|Eukaryota,39T6K@33154|Opisthokonta,3BJCU@33208|Metazoa,3D3GM@33213|Bilateria,41Y5C@6656|Arthropoda,3SG93@50557|Insecta,450EJ@7147|Diptera,45DB2@7148|Nematocera	33208|Metazoa	O	Polysaccharide deacetylase	-	GO:0003674,GO:0003824,GO:0004099,GO:0004553,GO:0004568,GO:0005488,GO:0005575,GO:0005576,GO:0006022,GO:0006026,GO:0006030,GO:0006032,GO:0006040,GO:0006807,GO:0008061,GO:0008144,GO:0008150,GO:0008152,GO:0009056,GO:0009057,GO:0009987,GO:0016787,GO:0016798,GO:0016810,GO:0016811,GO:0017144,GO:0019213,GO:0042737,GO:0043170,GO:0044237,GO:0044248,GO:0046348,GO:0071704,GO:0097367,GO:1901071,GO:1901072,GO:…	-	-	-	-	-	-	-	-	-	-	CBM_14,Ldl_recept_a,Polysacc_deac_1
LOC119646738	3025.82	326.839	242.127	677.77	362.756	539.446	195.567	144.007	279.566	344.372	306.112	402.865	167.925	444.146	163.074	203.494	116.249	86.9608	114.472	156.174	118.056	124.472	360.841	155.355	345.426	237.658	183.28	240.318	XP_037903244.1	7213.XP_004524833.1	1.01e-55	176	KOG1781@1|root,KOG1781@2759|Eukaryota,3A654@33154|Opisthokonta,3BRX8@33208|Metazoa,3D84X@33213|Bilateria,41ZSB@6656|Arthropoda,3SN35@50557|Insecta,453RQ@7147|Diptera	33208|Metazoa	A	LSM domain	LSM 7.00	GO:0000288,GO:0000291,GO:0000375,GO:0000377,GO:0000398,GO:0000956,GO:0003674,GO:0003676,GO:0003723,GO:0005488,GO:0005515,GO:0005575,GO:0005622,GO:0005623,GO:0005634,GO:0005654,GO:0005681,GO:0005684,GO:0005688,GO:0005689,GO:0005737,GO:0005829,GO:0006139,GO:0006396,GO:0006397,GO:0006401,GO:0006402,GO:0006725,GO:0006807,GO:0008150,GO:0008152,GO:0008380,GO:0009056,GO:0009057,GO:0009892,GO:0009987,GO:…	-	ko:K12626	ko03018,ko03040,map03018,map03040	M00354,M00396,M00397	-	-	ko00000,ko00001,ko00002,ko03019,ko03041	-	-	-	LSM
LOC119646739	140.923	149.895	123.21	101.113	8.63864	66.9796	55.4386	48.0426	120.114	84.0871	62.8477	151.916	71.8409	154.67	88.866	111.362	52.3263	76.6179	87.3222	61.9189	75.0329	64.7117	81.3061	72.1118	82.2977	83.2304	66.7921	67.669	XP_037903245.1	7159.AAEL012330-PA	6.54e-147	423	COG2101@1|root,KOG3302@2759|Eukaryota,38BPR@33154|Opisthokonta,3BBTG@33208|Metazoa,3CX9C@33213|Bilateria,41VYQ@6656|Arthropoda,3SJZZ@50557|Insecta,450Q3@7147|Diptera,45CNM@7148|Nematocera	33208|Metazoa	K	TATA-box-binding protein	TBP	GO:0000120,GO:0000126,GO:0000228,GO:0000428,GO:0000785,GO:0000790,GO:0000791,GO:0000976,GO:0000977,GO:0000978,GO:0000981,GO:0000987,GO:0000988,GO:0000989,GO:0000992,GO:0001006,GO:0001012,GO:0001016,GO:0001032,GO:0001034,GO:0001047,GO:0001067,GO:0001076,GO:0001085,GO:0001091,GO:0001092,GO:0001093,GO:0001098,GO:0001099,GO:0001103,GO:0001129,GO:0001132,GO:0001939,GO:0001940,GO:0002376,GO:0002520,GO:…	-	ko:K03120	ko03022,ko05016,ko05165,ko05166,ko05168,ko05169,ko05203,map03022,map05016,map05165,map05166,map05168,map05169,map05203	-	-	-	ko00000,ko00001,ko03000,ko03021	-	-	-	TBP
LOC119646740	158.009	111.316	342.283	915.751	447.369	349.748	302.983	315.921	517.628	542.683	551.554	290.561	648.73	288.15	164.755	624.401	385.175	469.771	441.757	378.021	252.927	283.875	250.457	493.754	351.516	437.059	336.849	435.167	XP_037903246.1	7213.XP_004524977.1	6.21e-298	845	KOG3700@1|root,KOG3700@2759|Eukaryota,39YBZ@33154|Opisthokonta,3BDE2@33208|Metazoa,3D5ZD@33213|Bilateria,41YD7@6656|Arthropoda,3SGQS@50557|Insecta,44XE1@7147|Diptera	33208|Metazoa	S	transferase activity, transferring acyl groups other than amino-acyl groups	-	GO:0000003,GO:0003006,GO:0003008,GO:0007275,GO:0007276,GO:0007281,GO:0007292,GO:0007586,GO:0007588,GO:0008150,GO:0009987,GO:0019953,GO:0022412,GO:0022414,GO:0022600,GO:0030154,GO:0030421,GO:0032501,GO:0032502,GO:0032504,GO:0040003,GO:0042335,GO:0044703,GO:0048468,GO:0048477,GO:0048609,GO:0048856,GO:0048869,GO:0051704	-	-	-	-	-	-	-	-	-	-	Acyl_transf_3
LOC119646741	12877.9	3466.03	728.409	1937.84	1693.73	2112.43	1560.67	988.656	974.201	770.769	2421.81	924.355	299.355	5339.81	1491.62	443.334	649.954	732.482	288.587	713.46	568.369	655.056	1933.16	793.395	697.216	1128.32	747.425	1157.69	XP_037903247.1	7159.AAEL010500-PA	2.55e-86	261	COG0625@1|root,KOG0867@2759|Eukaryota,3A335@33154|Opisthokonta,3BQXC@33208|Metazoa,3D80I@33213|Bilateria,41ZNR@6656|Arthropoda,3SMFJ@50557|Insecta,4556A@7147|Diptera,45GWD@7148|Nematocera	33208|Metazoa	O	Glutathione S-transferase, N-terminal domain	-	-	2.5.1.18	ko:K00799	ko00480,ko00980,ko00982,ko00983,ko01524,ko05200,ko05204,ko05225,ko05418,map00480,map00980,map00982,map00983,map01524,map05200,map05204,map05225,map05418	-	R03522,R07002,R07003,R07004,R07023,R07024,R07025,R07026,R07069,R07070,R07083,R07084,R07091,R07092,R07093,R07094,R07100,R07113,R07116,R08280,R09409,R11905	RC00004,RC00069,RC00840,RC00948,RC01704,RC01705,RC01706,RC01758,RC01759,RC01765,RC01767,RC01769,RC02243,RC02527,RC02939,RC02940,RC02942,RC02943,RC02944	ko00000,ko00001,ko01000,ko02000	1.A.12.2.2,1.A.12.3.2	-	-	GST_C,GST_N,GST_N_3
LOC119646743	0	8.35674	2.69596	0	27.7813	7.31384	6.16755	5.23374	9.93805	0	3.33955	3.51099	14.029	7.47213	6.95521	8.44852	5.81411	3.82932	10.7781	0	2.63543	2.2589	10.0074	5.4054	0	0	3.03429	0	XP_037903250.1	7260.FBpp0253016	3.44e-142	413	28MP4@1|root,2QU73@2759|Eukaryota,39P1D@33154|Opisthokonta,3BQ20@33208|Metazoa,3CZXY@33213|Bilateria,41XI5@6656|Arthropoda,3SJHA@50557|Insecta,453AG@7147|Diptera,45VCM@7214|Drosophilidae	33208|Metazoa	S	Immunoglobulin	-	GO:0000902,GO:0000904,GO:0006928,GO:0006935,GO:0007155,GO:0007157,GO:0007275,GO:0007399,GO:0007409,GO:0007411,GO:0008037,GO:0008038,GO:0008039,GO:0008045,GO:0008150,GO:0009605,GO:0009653,GO:0009987,GO:0016043,GO:0016201,GO:0022008,GO:0022610,GO:0030030,GO:0030154,GO:0030182,GO:0031175,GO:0032501,GO:0032502,GO:0032989,GO:0032990,GO:0040011,GO:0042221,GO:0042330,GO:0048468,GO:0048666,GO:0048667,GO:…	-	-	-	-	-	-	-	-	-	-	C2-set_2,Ig_3
LOC119646744	2397.47	2044.12	2566.73	553.202	9687.76	4829.93	2851.41	5921.28	1453.46	2409.45	772.701	3401.42	2975.2	649.985	4078.64	2039.1	3484	1091.4	522.03	2495.27	1721.93	1093.04	1061.46	1694.7	2097.35	788.088	736.62	1474	XP_037903253.1	69319.XP_008560133.1	1.02e-251	742	COG2124@1|root,KOG0158@2759|Eukaryota,38BTY@33154|Opisthokonta,3BF8S@33208|Metazoa,3D3J9@33213|Bilateria,41X57@6656|Arthropoda,3SZNZ@50557|Insecta,46KZH@7399|Hymenoptera	33208|Metazoa	Q	Cytochrome P450	-	-	-	ko:K14999	-	-	-	-	ko00000,ko00199,ko01000	-	-	-	p450
LOC119646747	69.9255	62.6259	49.1887	15.8884	17.344	13.4056	14.093	20.9242	38.0969	23.2858	29.2439	40.3792	18.9826	43.7575	36.8471	42.2412	30.5232	39.5722	58.6646	26.4722	27.6652	28.2673	33.6911	19.8217	42.3804	38.8065	57.6572	37.0706	XP_037903252.1	7234.FBpp0190739	6.74e-12	76.6	KOG1721@1|root,KOG1721@2759|Eukaryota,38BZ9@33154|Opisthokonta,3BA9A@33208|Metazoa,3CT35@33213|Bilateria,41WW3@6656|Arthropoda,3SR27@50557|Insecta,451JP@7147|Diptera,45P2K@7214|Drosophilidae	33208|Metazoa	K	Metal ion binding	-	GO:0000122,GO:0000976,GO:0000977,GO:0000978,GO:0000981,GO:0000982,GO:0000987,GO:0001012,GO:0001067,GO:0001078,GO:0001227,GO:0003674,GO:0003676,GO:0003677,GO:0003690,GO:0003700,GO:0005488,GO:0005575,GO:0005622,GO:0005623,GO:0005634,GO:0006355,GO:0006357,GO:0008150,GO:0009889,GO:0009890,GO:0009892,GO:0010468,GO:0010556,GO:0010558,GO:0010605,GO:0010629,GO:0019219,GO:0019222,GO:0031323,GO:0031324,GO:…	-	ko:K09228	-	-	-	-	ko00000,ko03000	-	-	-	zf-AD,zf-C2H2,zf-C2H2_6,zf-met
LOC119646749	427.504	276.946	319.57	273.014	494.304	306.733	383.401	197.081	323.998	362.922	357.065	341.744	315.598	232.448	239.28	314.152	319.693	309.129	283.336	410.633	249.861	238.024	333.494	366.149	301.822	370.225	338.663	290.594	XP_037903255.1	7159.AAEL007196-PA	2.13e-98	296	28IWR@1|root,2QR8E@2759|Eukaryota,39THM@33154|Opisthokonta,3BGQQ@33208|Metazoa,3CSJ7@33213|Bilateria,41YYP@6656|Arthropoda,3SKZZ@50557|Insecta,44WZY@7147|Diptera,45DIB@7148|Nematocera	33208|Metazoa	S	Matrix AAA peptidase interacting protein 1	C2orf47	GO:0003674,GO:0005488,GO:0005515,GO:0005575,GO:0005622,GO:0005623,GO:0005737,GO:0005739,GO:0005740,GO:0005743,GO:0005759,GO:0006810,GO:0006811,GO:0006812,GO:0006816,GO:0006839,GO:0006851,GO:0006873,GO:0006874,GO:0006875,GO:0006996,GO:0007005,GO:0007006,GO:0007007,GO:0008104,GO:0008150,GO:0009987,GO:0016020,GO:0016043,GO:0019725,GO:0019866,GO:0030001,GO:0030003,GO:0031090,GO:0031966,GO:0031967,GO:…	-	-	-	-	-	-	-	-	-	-	-
LOC119646750	83.8128	59.7607	158.283	69.333	285.62	180.3	466.608	543.555	87.7982	190.4	16.7353	79.8953	129.611	17.0716	52.8004	297.223	385.177	182.575	75.3928	331.309	268.642	242.464	51.076	350.565	435.518	96.1352	213.23	306.178	XP_037903256.1	7176.CPIJ016856-PA	4.51e-173	504	COG2124@1|root,KOG0158@2759|Eukaryota,38BTY@33154|Opisthokonta,3BF8S@33208|Metazoa,3CV2F@33213|Bilateria,41VYX@6656|Arthropoda,3SK5P@50557|Insecta,455FX@7147|Diptera,45FEX@7148|Nematocera	33208|Metazoa	Q	cytochrome P450	Cyp6a9	GO:0002118,GO:0003674,GO:0003824,GO:0004497,GO:0005575,GO:0005622,GO:0005623,GO:0005737,GO:0005783,GO:0005789,GO:0006082,GO:0006091,GO:0006629,GO:0006631,GO:0006805,GO:0006950,GO:0006952,GO:0007610,GO:0008150,GO:0008152,GO:0009055,GO:0009266,GO:0009404,GO:0009410,GO:0009605,GO:0009607,GO:0009617,GO:0009628,GO:0009636,GO:0009987,GO:0010033,GO:0010243,GO:0012505,GO:0014070,GO:0014074,GO:0016020,GO:…	-	ko:K14999,ko:K15003	-	-	-	-	ko00000,ko00199,ko01000	-	-	-	p450
LOC119646751	391.087	535.698	776.571	322.11	681.91	464.137	526.453	760.919	390.126	563.114	163.19	539.96	648.894	126.967	337.624	496.14	1402.63	669.025	293.183	1273.83	952.067	1387.05	520.867	1040	1187.72	586.078	399.91	925.771	XP_037903257.1	7176.CPIJ016856-PA	9.68e-174	505	COG2124@1|root,KOG0158@2759|Eukaryota,38BTY@33154|Opisthokonta,3BF8S@33208|Metazoa,3CV2F@33213|Bilateria,41VYX@6656|Arthropoda,3SK5P@50557|Insecta,455FX@7147|Diptera,45FEX@7148|Nematocera	33208|Metazoa	Q	cytochrome P450	Cyp6a9	GO:0002118,GO:0003674,GO:0003824,GO:0004497,GO:0005575,GO:0005622,GO:0005623,GO:0005737,GO:0005783,GO:0005789,GO:0006082,GO:0006091,GO:0006629,GO:0006631,GO:0006805,GO:0006950,GO:0006952,GO:0007610,GO:0008150,GO:0008152,GO:0009055,GO:0009266,GO:0009404,GO:0009410,GO:0009605,GO:0009607,GO:0009617,GO:0009628,GO:0009636,GO:0009987,GO:0010033,GO:0010243,GO:0012505,GO:0014070,GO:0014074,GO:0016020,GO:…	-	ko:K14999,ko:K15003	-	-	-	-	ko00000,ko00199,ko01000	-	-	-	p450
LOC119646752	2282.39	1500.27	2555.11	352.837	2531.75	980.058	1403.89	1668.7	553.533	884.282	442.637	738.602	590.617	604.697	2272.4	504.434	1759.03	1046.01	486.937	1575.71	950.719	2145.69	479.122	1236.91	1024.86	457.871	1108.93	3626.01	XP_037903258.1	7159.AAEL009126-PA	8.43e-182	526	COG2124@1|root,KOG0158@2759|Eukaryota,38BTY@33154|Opisthokonta,3BF8S@33208|Metazoa,3CV2F@33213|Bilateria,41VYX@6656|Arthropoda,3SK5P@50557|Insecta,458DN@7147|Diptera,45MJX@7148|Nematocera	33208|Metazoa	Q	cytochrome P450	Cyp6a9	GO:0002118,GO:0003674,GO:0003824,GO:0004497,GO:0005575,GO:0005622,GO:0005623,GO:0005737,GO:0005783,GO:0005789,GO:0006082,GO:0006091,GO:0006629,GO:0006631,GO:0006805,GO:0006950,GO:0006952,GO:0007610,GO:0008150,GO:0008152,GO:0009055,GO:0009266,GO:0009404,GO:0009410,GO:0009605,GO:0009607,GO:0009617,GO:0009628,GO:0009636,GO:0009987,GO:0010033,GO:0010243,GO:0012505,GO:0014070,GO:0014074,GO:0016020,GO:…	-	ko:K14999,ko:K15003	-	-	-	-	ko00000,ko00199,ko01000	-	-	-	p450
LOC119646753	543.218	360.518	99.0007	195	145.331	266.77	216.549	146.308	192.996	130.658	207.598	156.286	76.7811	310.467	322.995	73.7298	223.839	402.194	279.998	749.738	208.044	269.803	165.157	401.056	779.648	195.991	332.387	663.89	XP_037903264.1	43151.ADAC002563-PA	8.43e-178	515	COG2124@1|root,KOG0158@2759|Eukaryota,38BTY@33154|Opisthokonta,3BF8S@33208|Metazoa,3CV2F@33213|Bilateria,41VYX@6656|Arthropoda,3SK5P@50557|Insecta,458DN@7147|Diptera,45MJX@7148|Nematocera	33208|Metazoa	Q	cytochrome P450	Cyp6a9	GO:0002118,GO:0003674,GO:0003824,GO:0004497,GO:0005575,GO:0005622,GO:0005623,GO:0005737,GO:0005783,GO:0005789,GO:0006082,GO:0006091,GO:0006629,GO:0006631,GO:0006805,GO:0006950,GO:0006952,GO:0007610,GO:0008150,GO:0008152,GO:0009055,GO:0009266,GO:0009404,GO:0009410,GO:0009605,GO:0009607,GO:0009617,GO:0009628,GO:0009636,GO:0009987,GO:0010033,GO:0010243,GO:0012505,GO:0014070,GO:0014074,GO:0016020,GO:…	-	ko:K14999,ko:K15003	-	-	-	-	ko00000,ko00199,ko01000	-	-	-	p450
LOC119646754	1535.16	1254.96	1833.39	733.774	19089.5	1592.24	1702.67	1749.82	1033.7	1721.71	244.338	1103.61	457.354	151.51	4759.65	1698.86	223.839	215.771	65.8189	833.434	154.074	72.5138	144.109	606.505	20.7785	27.7314	91.0593	45.1209	XP_037903261.1	7165.AGAP008212-PA	8.14e-180	521	COG2124@1|root,KOG0158@2759|Eukaryota,38BTY@33154|Opisthokonta,3BF8S@33208|Metazoa,3CV2F@33213|Bilateria,41VYX@6656|Arthropoda,3SGMH@50557|Insecta,44XUS@7147|Diptera,45FWK@7148|Nematocera	33208|Metazoa	Q	cytochrome P450	Cyp6a9	GO:0002118,GO:0003674,GO:0003824,GO:0004497,GO:0005575,GO:0005622,GO:0005623,GO:0005737,GO:0005783,GO:0005789,GO:0006082,GO:0006091,GO:0006629,GO:0006631,GO:0006805,GO:0006950,GO:0006952,GO:0007610,GO:0008150,GO:0008152,GO:0009055,GO:0009266,GO:0009404,GO:0009410,GO:0009605,GO:0009607,GO:0009617,GO:0009628,GO:0009636,GO:0009987,GO:0010033,GO:0010243,GO:0012505,GO:0014070,GO:0014074,GO:0016020,GO:…	-	ko:K14999,ko:K15003	-	-	-	-	ko00000,ko00199,ko01000	-	-	-	p450
LOC119646755	213.649	161.15	204.734	300.445	735.268	286.257	275.524	210.051	241.867	373.747	104.64	339.793	225.391	136.562	309.097	237.318	219.479	108.529	161.535	301.968	146.156	106.567	164.252	234.326	102.236	109.091	116.867	189.337	XP_037903262.1	7176.CPIJ016855-PA	6.34e-176	511	COG2124@1|root,KOG0158@2759|Eukaryota,38BTY@33154|Opisthokonta,3BF8S@33208|Metazoa,3CV2F@33213|Bilateria,41YJ6@6656|Arthropoda,3SKH6@50557|Insecta,45543@7147|Diptera,45K3R@7148|Nematocera	33208|Metazoa	Q	Cytochrome P450	-	GO:0003674,GO:0003824,GO:0006950,GO:0006952,GO:0008150,GO:0008152,GO:0009605,GO:0009607,GO:0009617,GO:0016491,GO:0042742,GO:0043207,GO:0050896,GO:0051704,GO:0051707,GO:0055114,GO:0098542	-	ko:K14999,ko:K15003	-	-	-	-	ko00000,ko00199,ko01000	-	-	-	p450
LOC119646756	201.133	96.5802	186.567	194.999	905.197	1232.83	276.434	1049.41	175.598	383.848	92.0541	474.988	323.62	152.574	343.88	230.406	776.169	93.2037	53.8503	272.434	441.14	705.973	202.505	339.756	1023.98	350.351	120.655	280.391	XP_037903263.1	7176.CPIJ016855-PA	4.64e-178	516	COG2124@1|root,KOG0158@2759|Eukaryota,38BTY@33154|Opisthokonta,3BF8S@33208|Metazoa,3CV2F@33213|Bilateria,41YJ6@6656|Arthropoda,3SKH6@50557|Insecta,45543@7147|Diptera,45K3R@7148|Nematocera	33208|Metazoa	Q	Cytochrome P450	-	GO:0003674,GO:0003824,GO:0006950,GO:0006952,GO:0008150,GO:0008152,GO:0009605,GO:0009607,GO:0009617,GO:0016491,GO:0042742,GO:0043207,GO:0050896,GO:0051704,GO:0051707,GO:0055114,GO:0098542	-	ko:K14999,ko:K15003	-	-	-	-	ko00000,ko00199,ko01000	-	-	-	p450
LOC119646757	888.238	711.403	394.671	423.222	847.922	292.361	562.525	386.703	216.186	400.065	462.846	265.155	251.803	301.939	625.888	185.093	617.738	706.062	729.939	1643.64	534.615	735.58	675.123	1245.5	979.945	659.131	644.269	870.969	XP_037903265.1	7159.AAEL009127-PA	3.51e-175	509	COG2124@1|root,KOG0158@2759|Eukaryota,38BTY@33154|Opisthokonta,3BF8S@33208|Metazoa,3CV2F@33213|Bilateria,41VYX@6656|Arthropoda,3SGMH@50557|Insecta,44XUS@7147|Diptera,45FWK@7148|Nematocera	33208|Metazoa	Q	cytochrome P450	Cyp6a9	GO:0002118,GO:0003674,GO:0003824,GO:0004497,GO:0005575,GO:0005622,GO:0005623,GO:0005737,GO:0005783,GO:0005789,GO:0006082,GO:0006091,GO:0006629,GO:0006631,GO:0006805,GO:0006950,GO:0006952,GO:0007610,GO:0008150,GO:0008152,GO:0009055,GO:0009266,GO:0009404,GO:0009410,GO:0009605,GO:0009607,GO:0009617,GO:0009628,GO:0009636,GO:0009987,GO:0010033,GO:0010243,GO:0012505,GO:0014070,GO:0014074,GO:0016020,GO:…	-	ko:K14999,ko:K15003	-	-	-	-	ko00000,ko00199,ko01000	-	-	-	p450
LOC119646759	326.844	122.29	206.773	248.444	1059.25	1053.76	263.229	778.702	164.002	477.023	284.527	833.204	378.932	337.157	322.346	380.937	818.32	149.381	281.219	290.103	599.162	939.392	560.073	626.339	682.374	676.664	227.651	364.186	XP_037903266.1	7176.CPIJ016856-PA	1.4e-169	494	COG2124@1|root,KOG0158@2759|Eukaryota,38BTY@33154|Opisthokonta,3BF8S@33208|Metazoa,3CV2F@33213|Bilateria,41VYX@6656|Arthropoda,3SK5P@50557|Insecta,455FX@7147|Diptera,45FEX@7148|Nematocera	33208|Metazoa	Q	cytochrome P450	Cyp6a9	GO:0002118,GO:0003674,GO:0003824,GO:0004497,GO:0005575,GO:0005622,GO:0005623,GO:0005737,GO:0005783,GO:0005789,GO:0006082,GO:0006091,GO:0006629,GO:0006631,GO:0006805,GO:0006950,GO:0006952,GO:0007610,GO:0008150,GO:0008152,GO:0009055,GO:0009266,GO:0009404,GO:0009410,GO:0009605,GO:0009607,GO:0009617,GO:0009628,GO:0009636,GO:0009987,GO:0010033,GO:0010243,GO:0012505,GO:0014070,GO:0014074,GO:0016020,GO:…	-	ko:K14999,ko:K15003	-	-	-	-	ko00000,ko00199,ko01000	-	-	-	p450
LOC119646761	156.586	194.768	355.739	46.221	294.7	84.0816	80.1443	108.781	67.0856	100.239	18.3888	115.876	39.6185	16.0077	934.218	190.469	203.489	84.2543	56.2638	127.989	187.05	608.634	79.2532	163.989	128.809	215.308	133.53	486.73	XP_037903268.1	7176.CPIJ019702-PA	4.05e-173	504	COG2124@1|root,KOG0158@2759|Eukaryota,38BTY@33154|Opisthokonta,3BF8S@33208|Metazoa,3CV2F@33213|Bilateria,41VYX@6656|Arthropoda,3SGMH@50557|Insecta,44XUS@7147|Diptera,45FWK@7148|Nematocera	33208|Metazoa	Q	cytochrome P450	Cyp6a9	GO:0002118,GO:0003674,GO:0003824,GO:0004497,GO:0005575,GO:0005622,GO:0005623,GO:0005737,GO:0005783,GO:0005789,GO:0006082,GO:0006091,GO:0006629,GO:0006631,GO:0006805,GO:0006950,GO:0006952,GO:0007610,GO:0008150,GO:0008152,GO:0009055,GO:0009266,GO:0009404,GO:0009410,GO:0009605,GO:0009607,GO:0009617,GO:0009628,GO:0009636,GO:0009987,GO:0010033,GO:0010243,GO:0012505,GO:0014070,GO:0014074,GO:0016020,GO:…	-	ko:K14999,ko:K15003	-	-	-	-	ko00000,ko00199,ko01000	-	-	-	p450
LOC119646762	28236.3	4961.15	5173.58	24455.9	47109.1	26443.3	7017.55	9962.64	9493.01	14823.4	13205.2	21758.1	9743.42	19970.1	5555.07	7871.19	6972.75	6241.37	6624.3	6831.37	6677.96	4654.74	20352.3	6823.1	9241.93	10663.7	6318	5283.2	XP_037903269.1	7159.AAEL006509-PA	1.92e-54	171	KOG4103@1|root,KOG4103@2759|Eukaryota,3A6U7@33154|Opisthokonta,3BTVE@33208|Metazoa,3DA8I@33213|Bilateria,420PQ@6656|Arthropoda,3SNTN@50557|Insecta,453TF@7147|Diptera,45IUK@7148|Nematocera	33208|Metazoa	C	Mitochondrial ATP synthase g subunit	-	GO:0000276,GO:0005575,GO:0005622,GO:0005623,GO:0005737,GO:0005739,GO:0005740,GO:0005743,GO:0005753,GO:0005929,GO:0006139,GO:0006163,GO:0006164,GO:0006725,GO:0006753,GO:0006754,GO:0006793,GO:0006796,GO:0006807,GO:0006810,GO:0006811,GO:0006812,GO:0008150,GO:0008152,GO:0009058,GO:0009117,GO:0009123,GO:0009124,GO:0009126,GO:0009127,GO:0009141,GO:0009142,GO:0009144,GO:0009145,GO:0009150,GO:0009152,GO:…	-	ko:K02140	ko00190,ko01100,ko04714,map00190,map01100,map04714	M00158	-	-	ko00000,ko00001,ko00002	3.A.2.1	-	-	ATP-synt_G
LOC119646763	0	97.8572	63.957	216.641	133.06	112.03	98.552	177.55	106.844	63.8129	71.2003	110.626	102.376	88.5273	125.659	84.4704	66.8522	93.203	93.2973	100.216	113.199	77.163	136.063	68.4943	124.673	107.252	103.965	107.131	XP_037903271.1	7370.XP_005186860.1	1.15e-44	159	2CZ6Y@1|root,2S8TP@2759|Eukaryota,3A4ZQ@33154|Opisthokonta,3BRMQ@33208|Metazoa,3DAWW@33213|Bilateria,421CU@6656|Arthropoda,3SPBA@50557|Insecta,4579Z@7147|Diptera	33208|Metazoa	K	BESS motif	-	-	-	-	-	-	-	-	-	-	-	-	BESS,MADF_DNA_bdg
LOC119646764	0	13.2257	50.5399	17.3318	43.3824	110.907	56.3774	174.753	22.3595	32.393	31.7356	77.2396	62.7175	8.5383	67.4477	133.63	126.447	61.2672	40.7094	102.906	260.86	62.1486	95.56	81.9805	98.8777	84.9898	103.164	49.9652	XP_037903275.1	69319.XP_008554633.1	4.27e-245	723	COG2124@1|root,KOG0158@2759|Eukaryota,38BTY@33154|Opisthokonta,3BF8S@33208|Metazoa,3CV2F@33213|Bilateria,41TTZ@6656|Arthropoda,3SZ1K@50557|Insecta,46JF2@7399|Hymenoptera	33208|Metazoa	Q	Cytochrome P450	-	-	-	ko:K14999,ko:K15003	-	-	-	-	ko00000,ko00199,ko01000	-	-	-	p450
LOC119646767	3483.39	554.462	588.189	1198.41	4449.75	2178.69	562.139	24.8569	1021.62	1213.54	377.815	3170.59	872.241	2029.36	708.876	689.733	0	0	8528.1	1.48886	1.31175	4.61704	19405.4	11.7469	0	0	3723.39	0	XP_037903278.1	7213.XP_004531360.1	4.22e-21	87.4	KOG4295@1|root,KOG4295@2759|Eukaryota	2759|Eukaryota	S	serine-type endopeptidase inhibitor activity	-	-	-	-	-	-	-	-	-	-	-	-	Kunitz_BPTI
LOC119646769	72.6451	34.7465	40.4243	40.46	86.544	36.5582	44.0315	77.3655	49.7175	33.4368	15.9102	43.039	32.2107	42.6925	34.7446	41.4889	0	1.27729	118.507	0	0	0	6.3895	0	0	1.84966	94.8951	0	XP_037903279.1	7245.FBpp0257819	7.54e-207	578	KOG3865@1|root,KOG3865@2759|Eukaryota,38FJ9@33154|Opisthokonta,3BBXK@33208|Metazoa,3CWCI@33213|Bilateria,41XBW@6656|Arthropoda,3SIJZ@50557|Insecta,451JS@7147|Diptera,45UYP@7214|Drosophilidae	33208|Metazoa	T	It is involved in the biological process described with signal transduction	Arr1	GO:0001894,GO:0001895,GO:0002029,GO:0002032,GO:0002046,GO:0003008,GO:0003674,GO:0005488,GO:0005515,GO:0005575,GO:0005622,GO:0005623,GO:0005737,GO:0006810,GO:0006897,GO:0007600,GO:0007606,GO:0007608,GO:0008150,GO:0008277,GO:0009966,GO:0009968,GO:0010646,GO:0010648,GO:0016028,GO:0016059,GO:0016060,GO:0016192,GO:0022400,GO:0022401,GO:0023051,GO:0023057,GO:0023058,GO:0032091,GO:0032101,GO:0032501,GO:…	-	ko:K13808	-	-	-	-	ko00000	-	-	-	Arrestin_C,Arrestin_N
LOC119646770	142.556	209.986	235.11	183.441	58.9061	246.126	121.52	113.982	438.141	166.069	168.08	356.427	281.478	242.231	239.066	486.925	122.093	100.855	149.618	98.6024	44.7815	73.5784	144.001	103.627	134.634	142.326	166.165	115.229	XP_037903280.1	7213.XP_004526400.1	1.22e-186	549	KOG0127@1|root,KOG0127@2759|Eukaryota,38BUA@33154|Opisthokonta,3BCDB@33208|Metazoa,3CRCA@33213|Bilateria,41X8H@6656|Arthropoda,3SHMP@50557|Insecta,4513U@7147|Diptera	33208|Metazoa	A	nucleic acid binding	RBM28	GO:0003674,GO:0003676,GO:0003723,GO:0003729,GO:0005488,GO:0005575,GO:0005622,GO:0005623,GO:0005634,GO:0005730,GO:0031974,GO:0031981,GO:0043226,GO:0043227,GO:0043228,GO:0043229,GO:0043231,GO:0043232,GO:0043233,GO:0044422,GO:0044424,GO:0044428,GO:0044446,GO:0044464,GO:0070013,GO:0097159,GO:1901363	-	ko:K14573	ko03008,map03008	-	-	-	ko00000,ko00001,ko03009	-	-	-	RRM_1
LOC119646772	5050.6	1135.77	1399.16	8351.03	1995.03	4874.49	1237.12	1322.62	1223.98	3297.96	4395.09	3291	1524.34	6597.83	1542.94	1655.92	5261.85	3944.86	441.109	3563.97	4516.7	4521.58	1386.88	2216.03	4638.28	6411.5	1590.18	5364.09	XP_037903282.1	136037.KDR20688	8.88e-48	166	COG5640@1|root,KOG3627@2759|Eukaryota,3A0SR@33154|Opisthokonta,3BQSN@33208|Metazoa,3D7GV@33213|Bilateria,41Z8W@6656|Arthropoda,3SM0S@50557|Insecta	33208|Metazoa	O	serine-type endopeptidase activity. It is involved in the biological process described with proteolysis	-	GO:0003674,GO:0003824,GO:0004175,GO:0004252,GO:0005575,GO:0005622,GO:0005623,GO:0005737,GO:0006508,GO:0006807,GO:0008150,GO:0008152,GO:0008233,GO:0008236,GO:0016787,GO:0017171,GO:0019538,GO:0043170,GO:0044238,GO:0044424,GO:0044464,GO:0070011,GO:0071704,GO:0140096,GO:1901564	-	ko:K09640	-	-	-	-	ko00000,ko01000,ko01002	-	-	-	Trypsin
LOC119646773	137.152	165.749	527.055	135.771	1245.04	554.626	518.952	786.119	110.971	351.24	168.628	602.11	290.47	87.5291	692.047	569.872	1981.09	736.475	958.046	1252.08	565.294	876.325	1075.21	2148.55	1651.82	1719.03	1259.17	804.364	XP_037903287.1	7070.TC016235-PA	5.06e-259	793	COG2124@1|root,KOG0158@2759|Eukaryota,38BTY@33154|Opisthokonta,3BF8S@33208|Metazoa,3D3J9@33213|Bilateria,41X57@6656|Arthropoda,3SZNZ@50557|Insecta	33208|Metazoa	Q	Cytochrome P450	-	-	-	ko:K14999,ko:K15005	-	-	-	-	ko00000,ko00199,ko01000	-	-	-	p450
LOC119646775	109.041	94.1776	88.4854	18.5526	40.7905	51.1976	55.3492	56.4469	159.4	74.5303	32.8222	121.597	113.672	29.3232	74.6132	130.057	78.1348	200.154	102.906	95.6102	92.3558	107.553	112.847	104.914	34.2547	71.5372	79.3085	96.191	XP_037903285.1	7370.XP_005187447.1	1.46e-118	351	KOG3913@1|root,KOG3913@2759|Eukaryota,38K2G@33154|Opisthokonta,3B9HW@33208|Metazoa,3CS9G@33213|Bilateria,41W0Z@6656|Arthropoda,3SIBC@50557|Insecta,458S1@7147|Diptera	33208|Metazoa	T	Ligand for members of the frizzled family of seven transmembrane receptors	WNT7A	GO:0000003,GO:0000165,GO:0000187,GO:0000578,GO:0000902,GO:0000904,GO:0001101,GO:0001501,GO:0001502,GO:0001505,GO:0001525,GO:0001568,GO:0001570,GO:0001654,GO:0001655,GO:0001656,GO:0001664,GO:0001701,GO:0001709,GO:0001775,GO:0001822,GO:0001885,GO:0001890,GO:0001892,GO:0001932,GO:0001934,GO:0001944,GO:0002009,GO:0002011,GO:0002062,GO:0002064,GO:0002088,GO:0003002,GO:0003006,GO:0003158,GO:0003338,GO:…	-	ko:K00312,ko:K00572	ko04150,ko04310,ko04390,ko04550,ko04916,ko04934,ko05165,ko05166,ko05200,ko05205,ko05206,ko05217,ko05224,ko05225,ko05226,map04150,map04310,map04390,map04550,map04916,map04934,map05165,map05166,map05200,map05205,map05206,map05217,map05224,map05225,map05226	M00677	-	-	ko00000,ko00001,ko00002,ko00536	-	-	-	wnt
LOC119646776	297.657	419.222	437.867	85.221	242.51	201.036	367.186	269.769	573.151	360.502	160.576	294.979	694.22	146.189	382.202	480.012	75.5817	314.06	284.861	273.764	326.63	238.893	87.5081	210.862	313.32	299.451	277.707	328.761	XP_037903286.1	7176.CPIJ001861-PA	5.75e-185	545	COG0591@1|root,KOG2349@2759|Eukaryota,38EY4@33154|Opisthokonta,3BAZ5@33208|Metazoa,3CW54@33213|Bilateria,41U13@6656|Arthropoda,3SFM6@50557|Insecta,4565X@7147|Diptera,45CSD@7148|Nematocera	33208|Metazoa	P	Belongs to the sodium solute symporter (SSF) (TC 2.A.21) family	-	-	1.4.3.4	ko:K00274,ko:K14388	ko00260,ko00330,ko00340,ko00350,ko00360,ko00380,ko00950,ko00982,ko01100,ko01110,ko04726,ko04728,ko05030,ko05031,ko05034,map00260,map00330,map00340,map00350,map00360,map00380,map00950,map00982,map01100,map01110,map04726,map04728,map05030,map05031,map05034	M00135	R02173,R02382,R02529,R02532,R02613,R02908,R02919,R04025,R04300,R04674,R04890,R04893,R04894,R04907,R04908,R08346,R08347,R08348,R11354	RC00062,RC00160,RC00225,RC00676,RC00807,RC00808,RC01808,RC02226,RC02713	ko00000,ko00001,ko00002,ko01000,ko02000	2.A.21.5.3,2.A.21.5.4,2.A.21.5.5	-	-	SSF
[truncated: 10,387 more rows]
[truncated: 1 more columns]

## Sheet: Day 2 DEG
Gene	baseMean	log2FoldChange	lfcSE	stat	pvalue	padj	Comparison	eggNOG_OGs	max_annot_lvl	COG_category	Description	Preferred_name	GOs	EC	KEGG_ko	KEGG_Pathway	KEGG_Module	KEGG_Reaction	KEGG_rclass	BRITE	KEGG_TC	CAZy	BiGG_Reaction	PFAMs
LOC119646137	629.272	1.42673	0.409573	3.48345	0.000494991	0.0325534	mM10_vs_Control	28UV5@1|root,2R1K6@2759|Eukaryota,39WEK@33154|Opisthokonta,3BFIN@33208|Metazoa,3CZQB@33213|Bilateria,41W39@6656|Arthropoda,3SJE0@50557|Insecta	33208|Metazoa	S	regulation of mRNA processing	PTCD2	GO:0001655,GO:0001822,GO:0001889,GO:0003007,GO:0003205,GO:0003206,GO:0003208,GO:0003229,GO:0003231,GO:0005575,GO:0005622,GO:0005623,GO:0005737,GO:0005739,GO:0006996,GO:0007005,GO:0007275,GO:0007507,GO:0007517,GO:0008150,GO:0009653,GO:0009887,GO:0009888,GO:0009987,GO:0010468,GO:0014706,GO:0016043,GO:0019219,GO:0019222,GO:0030154,GO:0031323,GO:0032501,GO:0032502,GO:0042692,GO:0043226,GO:0043227,GO:…	-	ko:K17711	-	-	-	-	ko00000,ko03029	-	-	-	MRP-S27
[truncated: 343 more rows]

## Sheet: Day 7 DEG
Gene	baseMean	log2FoldChange	lfcSE	stat	pvalue	padj	Comparison	eggNOG_OGs	max_annot_lvl	COG_category	Description	Preferred_name	GOs	EC	KEGG_ko	KEGG_Pathway	KEGG_Module	KEGG_Reaction	KEGG_rclass	BRITE	KEGG_TC	CAZy	BiGG_Reaction	PFAMs
[truncated: 1,209 more rows]
